# Supplementary material
Source: HighWire-hosted journal article supplement (doi:10.1101/rna.075580.120)
Supplement: Supplemental_Information_.docx [file Supplemental_Information_.docx]

**Supplementary Information Donsbach *et al*.**

**Supplementary Methods**

*Derivation of eq. 1.*

The two relevant reactions are the binding equilibria of RNA1 (fl-32mer) and RNA2 (unlabeled RNA) to Hera (E):

The equilibrium constants *K*d1 and *K*d2 are

and

The fraction of the complex of Hera with unlabeled RNA, *E·RNA2*, is

which can be simplified to

and

resulting in

The anisotropy signal measured, *r*, is then given by

which is eq. 1.

**Supplementary Figures**

Supplementary Figure 1: **Growth curves**.

Cultures 1 and 2 (orange, squares; red, circles) were grown under normal-growth conditions (75°C), and RNA-protein complexes were cross-linked after the last time point. Cultures 3 and 4 (light blue, triangles; dark blue, inverted triangles) were subjected to a cold shock (65°C, 10 min) after the last time point, and RNA/protein complexes were then cross-linked.

Supplementary Figure 2: **Overlap between replicates and unrelated data sets.**

**A**: Schematic indicating how overlaps (purple) between two samples (1, 2; red, blue) were calculated, and the resulting Venn plot (right). The numbers above denote the number of individual (red, blue) and overlapping peaks (purple).

**B**: Venn plots showing the overlap between biological replicates Hera1 and Hera2 (red, orange) and Hera3 and Hera4 (blue, light blue) on the level of peaks identified.

**C**: Venn plots showing the overlap between unrelated samples (Hera1 and Hera3, Hera1 and Hera4, Hera2 and Hera3, Hera2 and Hera4) on the level of peaks identified. Note that the total number of peaks for each sample varies because of the assignment of overlaps depicted in panel A. The color code is the same as in B.

**D**: Venn plots showing the overlap between biological replicates Hera1 and Hera2, and Hera3 and Hera4 on the level of genes with significant peaks. The color code is the same as in B.

**E**: Venn plots showing the overlap between unrelated samples (Hera1 and Hera3, Hera1 and Hera4, Hera2 and Hera3, Hera2 and Hera4) on the level of genes with significant peaks. The color code is the same as in B.

Supplementary Figure 3: **Number of peaks per gene, gene length, and peak distance.**

**A:** Number of genes as a function of the number of peaks under normal-growth conditions (Hera12).

**B**: Number of genes as a function of the number of peaks under cold-shock conditions (Hera34).

**C**: Gene length as a function of the number of peaks identified per gene (Hera12).

**D**: Gene length as a function of the number of peaks identified per gene (Hera34).

**E**: Distance between peaks (peak center) under normal-growth conditions (Hera12). Black: all genes, red: genes with only two peaks.

**F**: Distance between peaks (peak center) under cold-shock conditions (Hera34). Black: all genes, blue: genes with only two peaks.

Supplementary Figure 4: **Nucleotide bias, purine/pyrimidine contents,** **and thermodynamic stability.**

**A**: Nucleotide content of RNA sequences identified under normal-growth- and cold-shock conditions (all sequences and top25 according to log2-fold enrichment over input).

**B**: Purine and pyrimidine content of RNA sequences identified under normal-growth- and cold-shock conditions (all sequences and top25 according to log2-fold enrichment over input).

**C**: Nucleotide content of RNA sequences identified under normal-growth- and cold-shock conditions relative to the nucleotide content of all genes (all peak sequences and top25 according to log2-fold enrichment over input).

**D**: Purine and pyrimidine content of RNA sequences identified under normal-growth- and cold-shock conditions relative to the purine and pyrimidine content of all genes (all peak sequences and top25 according to log2-fold enrichment over input).

**E:** Thermodynamic stabilityof the 25 highest-enriched sequences under normal-growth (n.g.) and cold-shock (c. s.) conditions at 25°C. n.s.: not significant.

**F**: Thermodynamic stabilityof the 25 highest-enriched sequences under normal-growth (n.g.) and cold-shock (c. s.) conditions at 65°C and at 75°. n.s.: not significant, *: *p* < 0.05.

Supplementary Figure 5: **Presence of a GGNY motif in RNA sequences identified.**

**A**: Occurrences of the GGNY motifs (GGAC, GGAU, GGGC, and GGGU) in RNA sequences identified under normal-growth- (red) and cold-shock conditions (blue).

**B**: Venn plot of occurrences of each sequence motif in RNA sequences identified under normal-growth conditions. 85% of the sequences identified contained at least one GGNY motif. 37% of the sequences contained one type of motif, 33% contained two of the motifs, 13% contained three of the motifs, and 2% contained all four motifs.

**C**: Venn plot of occurrences of each GGNY motif in RNA sequences identified under cold-shock conditions. 85% of the sequences identified contained at least one GGNY motif. 37% of the sequences contained one type of motif, 33% contained two of the motifs, 13% contained three of the motifs, and 2% contained all four motifs.

**D**: log2-fold enrichment of sequences identified under normal-growth (red, orange) and cold-shock conditions (blue, light blue) that contain a GGNY motif (red, blue) or that do not contain such a motif (orange, light blue). There is no positive correlation of the presence of a GGNY motif and the log2-fold enrichment. Instead, sequences containing the motif have a lower log2-fold enrichment (normal-growth conditions: *p* = 0.0002, cold-shock conditions: *p* = 0.003).

Supplementary Figure 6: **Displacement titrations of a Hera/32mer complex with unlabeled RNAs and DNA.**

Displacement titrations of a Hera/32mer complex with unlabeled 32mer (red, positive control), the homopolymeric 50mer 50U (blue open circles, positive control), 9mer DNA and 50A (gray and black open circles; negative controls). The fluorescence anisotropy of a fluorescein attached to the 5’-end of the 32mer (32mer-fl) was used as a probe for 32mer dissociation due to binding of unlabeled RNAs. Lines are fits using eq. 1 (see main text, Supplementary Methods). The *K*d values are 0.88 ± 0.23 µM (32mer) and 0.24 ± 0.05 µM (50U).

Anisotropy data were normalized by subtracting the offset and dividing by the amplitude. A value of one corresponds to no displacement, a value of zero to complete displacement of the fluorescein-labeled 32mer. Error bars denote standard errors of the mean (SEM) from duplicate experiments.

Supplementary Figure 7: **GC content of peaks in the *hera* gene.**

The GC content of peaks in the *hera* gene is higher than the average GC content of the *Thermus* genome, but similar to the GC content of the Hera gene (72.5%; orange triangles). Peaks: mean 73.4%, median 72.3%, genome: mean 69.4%, median 69.7%. ***: *p*-value < 0.001.

Supplementary Figure 8: **Sequence alignment of all *T. thermophilus* tRNAs.**

*T. thermophilus* has two classes of tRNAs, short tRNAs with a length of 72-77 nucleotides, and long tRNAs with 87-94 nucleotides. Long tRNAs contain insertions of varying lengths in the variable loop between the anticodon arm and the TC arm. The anticodon position is highlighted in orange. The sequence alignment was performed with CLUSTAL W.

Supplementary Figure 9: **Single-molecule FRET experiments: positive and negative controls.**

**A:** Displacement titration of a Hera/32mer complex with poly-G. The fluorescence anisotropy of a fluorescein attached to the 5’-end of the 32mer (32mer-fl) was used as a probe for 32mer dissociation due to binding of unlabeled RNAs. See Supplementary Figure 6 for control experiments. The concentration of poly-G is given in µM bases. The line represents the curve from an analysis with eq. 1 (see main text, Supplementary Methods); the *K*d value is 1.5 ± 0.5 µM bases.

Anisotropy data were normalized by subtracting the offset and dividing by the amplitude. A value of one corresponds to no displacement, a value of zero to complete displacement of the fluorescein-labeled 32mer. Error bars denote standard errors of the mean (SEM) from duplicate experiments.

**B:** FRET histograms for Hera (gray) and Hera in the presence of poly-G and ADPNP (top; magenta) and poly-U and ADPNP (bottom, cyan; positive control).

Supplementary Figure 10: **Confirmation of *hera* deletion mutants, growth curves, and phenotypes.**

**A**: PCR screen to confirm the replacement of the *hera* gene by the hygromycin cassette in mutants. DNA from the wildtype (wt) strain and each of the putative *hera* mutants (*hera*1-4) was purified and amplified with primers Hera10Dir and Hera11Rev (see Supplementary Table 6). Amplicons of the expected size of 1646 bp (wildtype) and 1358 bp (mutants) were detected. The amplicons were also sequenced. The molecular masses of the marker bands are: M1: 23130 bp, 9420 bp, 6560 bp, 4360 bp, bp 2320 bp, 2320 bp, 2020 bp, M2: 4370 bp, 2899 bp, 2498 bp, 2201 bp, 1933 bp, 1331 bp, 1150 bp, 759 bp, 579-611 bp.

**B**: Growth curves of the wildtype (wt, black) and the four *hera* deletion mutants (red) at 72°C. Data are the mean from two biological replicates, the error bars depict the standard error of the mean.

**C**: Growth curves of Hera wildtype (wt, black) and the four *hera* deletion mutants (red) at 55°C. Data are the mean from two biological replicates, the error bars depict the standard error of the mean.

The data in panels B and C are shown continuously on a logarithmic scale in Figure 9, main text.

**D**: Microscopic images of *T. thermophilus* wildtype (wt) and the mutants *hera*1-4 in the exponential (left) and stationary phase (right; growth temperature: 65°C). The scale bar corresponds to 10 µm. Arrows mark cells with aberrant morphologies.

Supplementary Figure 11: **Western Blots**.

**A**: Western Blot of 100, 10, 1, and 0.1 ng purified recombinant Hera with the -Hera antibody used for eCLIP experiments.

**B**: (In-line) Western Blots of input (inp) and immunoprecipitation (IP) samples with -IgG (control) and -Hera from eCLIP experiments (1, 2, 3, and 4: Hera1, Hera2, Hera,3 and Hera4, see main text for details of eCLIP experiments and IP). The red arrow marks the position of Hera. Hera is robustly detected in the input and -Hera IPs; only traces of Hera are detected in the control IPs with IgG.

Detection was performed with a secondary sheep -rabbit IgG (ThermoFisher) coupled to horseradish peroxidase through enhanced chemiluminescence (ECL System, GE Healthcare).

Supplementary Figure 12: **Size distribution of eCLIP libraries before purification**.

**A**: Size distribution of the eCLIP libraries before purification, analyzed on a D1000 Screentape (Agilent). The red lines mark the expected size range for eCLIP libraries (175-350 bp, of which 142 bp account for the adapters).

**B**: Size distribution of the eCLIP libraries before purification, analyzed on a D1000 Screentape (Agilent); densitometric analyses of the data shown in A. The red box highlights the expected size range for eCLIP libraries, the numbers refer to the mean number of basepairs.

SMInput: Size-matched input for samples 1, 2, 3, and 4. Hera: libraries from cells cultivated under normal-growth conditions (1, 2) and under cold-shock conditions (3, 4).

Supplementary Figure 13: **Size distribution of eCLIP libraries after purification**.

**A**: Size distribution of pooled eCLIP libraries after purification, analyzed on a D1000 Screentape (Agilent). The red lines mark the expected size range for eCLIP libraries (175-350 bp, of which 142 bp account for the adapters).

**B**: Size distribution of pooled eCLIP libraries after purification, analyzed on a D1000 Screentape (Agilent); densitometric analyses of the data shown in A. The red box highlights the expected size range for eCLIP libraries, the numbers refer to the mean number of basepairs. The area within the box is enlarged on the right.

Numbers 1-4 mark the libraries from cells cultivated under normal-growth conditions (1, 2) and under cold-shock conditions (3, 4), pooled with the corresponding size-matched input and an IgG control.

**Supplementary tables**

Supplementary Table 1: **Statistics on eCLIP sequencing data sets and data analysis**.

(SupplementaryTable_1.xlsx)

Supplementary Table 2: **Peaks identified under normal-growth conditions**.

Consolidated list, Hera12, 2797 peaks in 1370 genes. peak_contig: contig on GCF_000008125.1 on the peak was found, peak_start, peak_end: first and last nucleotide of the peak sequence, l10p: decadic logarithm of the *p*-value, l2fc: log2-fold change, enrichment over input, peak_strand: strand to which peak was mapped, gene_contig: contig of GCF_000008125.1 by which the gene was found, gene_start, gene_end: beginning and end of gene (nucleotide of the genome), gene_name: name of the gene, annotation build ASM812v1, gene_strand: coding strand.

(SupplementaryTable_2.xlsx)

Supplementary Table 3: **Peaks identified under cold-shock conditions.**

Consolidated list, Hera34, 1654 peaks in 1025 genes. peak_contig: contig on GCF_000008125.1 on the peak was found, peak_start, peak_end: first and last nucleotide of the peak sequence, l10p: decadic logarithm of the *p*-value, l2fc: log2-fold change, enrichment over input, peak_strand: strand to which peak was mapped, gene_contig: contig of GCF_000008125.1 by which the gene was found, gene_start, gene_end: beginning and end of gene (nucleotide of the genome), gene_name: name of the gene, annotation build ASM812v1, gene_strand: coding strand.

(SupplementaryTable_3.xlsx)

Supplementary Table 4: **Gene Ontology analysis with DAVID**

1. Analysis of genes identified in Hera12 (normal-growth conditions)
2. Analysis of genes identified in Hera34 (cold-shock conditions)
3. Analysis of genes identified both under normal-growth and cold-shock conditions
4. Analysis of genes identified only under normal-growth conditions
5. Analysis of genes identified only under cold-shock conditions
6. Analysis of genes without eCLIP peaks

(SupplementaryTable_4.xlsx, sheets a-f)

Supplementary Table5: **Peaks in genes related to tRNA metabolism**

1. aminoacyl-tRNA synthetase genes

all_tRNA-ligase_genes: all genes coding for aminoacyl-tRNA synthetases (tRNA ligases) in *T. thermophilus*, 12_total: aminoacyl-tRNA synthetase genes with peaks in Hera12, 34_total: aminoacyl-tRNA synthetase genes with peaks in Hera34, 12_34_common: aminoacyl-tRNA synthetase genes with peaks in Hera12 and in Hera34, 12_only: aminoacyl-tRNA synthetase genes with peaks only in Hera12, 34_only: aminoacyl-tRNA synthetase genes with peaks only in Hera34, nopeaks: aminoacyl-tRNA synthetase genes in which no peak was identified.

1. tRNA genes identified under normal-growth and cold-shock conditions.

all_tRNA-genes: all genes coding for tRNAs in *T. thermophilus*, 12_total: tRNAs with peaks in Hera12, 34_total: tRNAs with peaks in Hera34, 12_34_common: tRNAs with peaks in Hera12 and in Hera34, 12_only: tRNAs with peaks only in Hera12, 34_only: tRNAs with peaks only in Hera34, nopeaks: tRNAs in which no peak was identified.

1. genes coding for tRNA-modifying enzymes

all_tRNA-related_genes: all genes related to tRNA metabolism in *T. thermophilus*, 12_total: tRNA-related genes with peaks in Hera12, 34_total: tRNA-related genes with peaks in Hera34, 12_34_common: tRNA-related genes with peaks in Hera12 and in Hera34, 12_only: tRNA-related genes with peaks only in Hera12, 34_only: tRNA-related genes with peaks only in Hera34, nopeaks: tRNA-related genes in which no peak was identified.

(SupplementaryTable_5a.xlsx, SupplementaryTable_5b.xlsx, SupplementaryTable_5c.xlsx)

Supplementary Table 6: **Oligonucleotides used for the isolation and analysis of the *hera* mutants**.

| primer | sequence | purpose |
| --- | --- | --- |
| Hera1-UpDir-EcoRI | 5’-CGACCAGGAATTCACCGCCATAGAC-3’ | amplification of upstream arm |
| Hera2-UpRev-XbaI | 5’-TCTTTAAACTCTAGACTCTGCCTTTCC-3’ | amplification of upstream arm |
| Hera3-DownDir-XbaI | 5’-ACGAGGCGCCCGTCTAGAGCGTAGGT-3’ | amplification of downstream arm |
| Hera4-DownRev-SalI | 5’-TGCTTGGTCGACCCGAAGCCGATGTG-3’ | amplification of downstream arm |
| Hera10-Dir | 5’-TTGACTTTCGTGCCCTAGTT-3’ | confirmation of mutation |
| Hera11-Rev | 5’-GAAGAACCCACGGGAAA-3’ | confirmation of mutation |
