# Supplementary material
Source: HighWire-hosted journal article supplement (doi:10.1101/rna.075580.120)
Supplement: Supplemental_Table_1.xlsx [file Supplemental_Table_1.xlsx]

## Sheet: Sheet1
	Inline barcode	Initial reads num	Reads after cutadapt 2	RepBase filtered reads (Uniquely mapped)	RepBase filtered reads (Mapped to multiple loci)	Reads after RepBase filter	Genome mapped reads (Uniquely mapped)	Genome mapped reads (Mapped to multiple loci)	CLIPPER peak clusters	Significant peaks (-l10p >= 3, l2fc >= 3)
HER1_CLIP	X1A	745034	704000	5288	791	697922	335406	261926	8327	7129
HER1_CLIP	X1B	409083	383594	2974	433	380187	169831	156566	8327	7129
HER1_INPUT		2622193	2618025	8051	820	2609155	28740	2450293
HER2_CLIP	X1A	749887	703476	7058	718	695700	223616	391120	8059	5939
HER2_CLIP	X1B	420111	390987	4306	371	386310	111780	229853	8059	5939
HER2_INPUT		2467081	2465224	15705	1406	2448113	14717	2330454
HER3_CLIP	X1A	516756	459212	1835	773	456604	156915	260992	6900	5259
HER3_CLIP	X1B	274158	242187	973	349	240865	75257	145182	6900	5259
HER3_INPUT		3215097	3209416	29274	6469	3173673	55044	2929795
HER4_CLIP	X1A	673096	638980	19379	2454	617149	262968	241407	5970	4940
HER4_CLIP	X1B	378963	357457	11029	1227	345203	134645	149454	5970	4940
HER4_INPUT		2493575	2491617	6169	627	2484823	29511	2351987
