# Supplementary material
Source: HighWire-hosted journal article supplement (doi:10.1101/rna.075580.120)
Supplement: Supplemental_Table_2.xlsx [file Supplemental_Table_2.xlsx]

## Sheet: Sheet1
peak_contig	peak_start	peak_end	l10p	l2fc	peak_strand	gene_contig	gene_start	gene_end	gene_name	gene_strand
NC_005835.1	438369	438463	114.666	9.22929	-	NC_005835.1	438009	438546	TT_RS02280	-
NC_005835.1	340640	340665	83.1127	8.71391	+	NC_005835.1	339637	341689	TT_RS01800	+
NC_005835.1	967337	967363	78.624	8.70428	+	NC_005835.1	967095	967389	TT_RS04970	+
NC_005835.1	341292	341354	135.811	8.51758	+	NC_005835.1	339637	341689	TT_RS01800	+
NC_005835.1	1255292	1255328	62.9805	8.39723	-	NC_005835.1	1255127	1255346	TT_RS06585	-
NC_005835.1	340853	340965	112.096	8.36758	+	NC_005835.1	339637	341689	TT_RS01800	+
NC_005835.1	340392	340474	147.819	8.33177	+	NC_005835.1	339637	341689	TT_RS01800	+
NC_005835.1	1497409	1497446	62.2909	8.26761	+	NC_005835.1	1497146	1497941	TT_RS07980	+
NC_005838.1	6744	6803	58.5193	8.25799	+	NC_005838.1	5965	7066	TT_RS10175	+
NC_005835.1	300253	300339	154.861	8.22873	-	NC_005835.1	299799	301557	TT_RS01595	-
NC_005835.1	1253818	1253873	81.2908	8.20393	-	NC_005835.1	1253544	1254174	TT_RS06565	-
NC_005835.1	297959	298023	55.3868	8.17663	-	NC_005835.1	297724	298393	TT_RS01580	-
NC_005835.1	752713	752756	54.1377	8.1712	+	NC_005835.1	752545	752815	TT_RS03920	+
NC_005835.1	301454	301543	77.1368	8.12078	-	NC_005835.1	299799	301557	TT_RS01595	-
NC_005835.1	1233424	1233471	50.4918	8.11302	-	NC_005835.1	1232980	1234168	TT_RS06455	-
NC_005835.1	1482738	1482762	102.518	8.11063	-	NC_005835.1	1482685	1482762	TT_RS07895	-
NC_005835.1	297241	297297	63.0857	8.09709	-	NC_005835.1	296983	297724	TT_RS01575	-
NC_005835.1	1254515	1254557	50.9932	8.05462	-	NC_005835.1	1254186	1254576	TT_RS06570	-
NC_005835.1	1249678	1249726	61.9107	8.02994	-	NC_005835.1	1248817	1250179	TT_RS06535	-
NC_005835.1	1631513	1631531	73.2567	8.01238	+	NC_005835.1	1630034	1631666	TT_RS08700	+
NC_005835.1	1255452	1255484	47.6466	8.00267	-	NC_005835.1	1255354	1256122	TT_RS06590	-
NC_005835.1	438174	438205	47.7538	8.00018	-	NC_005835.1	438009	438546	TT_RS02280	-
NC_005835.1	340800	340836	97.6491	7.95873	+	NC_005835.1	339637	341689	TT_RS01800	+
NC_005835.1	1793317	1793352	47.4536	7.9456	+	NC_005835.1	1793286	1793358	TT_RS09590	+
NC_005835.1	1577622	1577796	53.1223	7.93578	+	NC_005835.1	1576802	1577624	TT_RS08430	+
NC_005835.1	1577622	1577796	53.1223	7.93578	+	NC_005835.1	1577604	1578831	TT_RS08435	+
NC_005835.1	339748	339823	190.584	7.92869	+	NC_005835.1	339637	341689	TT_RS01800	+
NC_005835.1	1068352	1068380	44.9495	7.91336	-	NC_005835.1	1068266	1068689	TT_RS05560	-
NC_005835.1	1233794	1233833	43.7068	7.88641	-	NC_005835.1	1232980	1234168	TT_RS06455	-
NC_005835.1	1464885	1464962	46.4931	7.88166	-	NC_005835.1	1464036	1465599	TT_RS07770	-
NC_005835.1	1579823	1579918	43.6892	7.87588	-	NC_005835.1	1579490	1579934	TT_RS08445	-
NC_005835.1	1068588	1068667	60.0071	7.85661	-	NC_005835.1	1068266	1068689	TT_RS05560	-
NC_005835.1	1233349	1233389	62.8125	7.8455	-	NC_005835.1	1232980	1234168	TT_RS06455	-
NC_005835.1	1233501	1233540	60.2317	7.8424	-	NC_005835.1	1232980	1234168	TT_RS06455	-
NC_005835.1	1412880	1412936	61.7035	7.82826	+	NC_005835.1	1412232	1412985	TT_RS07515	+
NC_005835.1	1605526	1605579	50.0163	7.81389	-	NC_005835.1	1605359	1606430	TT_RS08580	-
NC_005835.1	1380891	1380962	43.5809	7.79988	-	NC_005835.1	1377887	1382462	TT_RS07380	-
NC_005835.1	1497552	1497588	64.329	7.79771	+	NC_005835.1	1497146	1497941	TT_RS07980	+
NC_005835.1	1389273	1389314	43.2865	7.78559	-	NC_005835.1	1388165	1389890	TT_RS07405	-
NC_005835.1	1464254	1464333	44.8023	7.77834	-	NC_005835.1	1464036	1465599	TT_RS07770	-
NC_005835.1	217080	217140	41.8116	7.77395	-	NC_005835.1	216032	217478	TT_RS01160	-
NC_005835.1	1258969	1259013	57.1678	7.76414	-	NC_005835.1	1258615	1259104	TT_RS06615	-
NC_005835.1	298965	299008	41.0753	7.76411	-	NC_005835.1	298380	299031	TT_RS01585	-
NC_005835.1	752575	752613	40.0885	7.76196	+	NC_005835.1	752545	752815	TT_RS03920	+
NC_005835.1	146148	146238	39.4978	7.73941	-	NC_005835.1	146029	147157	TT_RS00840	-
NC_005838.1	14101	14168	45.326	7.73583	+	NC_005838.1	13776	14484	TT_RS10220	+
NC_005835.1	156239	156382	41.7657	7.69713	-	NC_005835.1	155469	157680	TT_RS00885	-
NC_005835.1	588043	588093	39.6018	7.69664	-	NC_005835.1	586767	588774	TT_RS03065	-
NC_005835.1	1253754	1253792	56.0696	7.69631	-	NC_005835.1	1253544	1254174	TT_RS06565	-
NC_005835.1	903717	903803	37.9983	7.69045	-	NC_005835.1	902447	905348	TT_RS04665	-
NC_005835.1	193717	193842	41.9676	7.67381	+	NC_005835.1	193148	194201	TT_RS01050	+
NC_005835.1	1681524	1681554	38.9759	7.67305	+	NC_005835.1	1681160	1681592	TT_RS09025	+
NC_005835.1	655873	655918	37.5292	7.66665	-	NC_005835.1	655731	656172	TT_RS03405	-
NC_005835.1	1650525	1650577	140.682	7.64777	+	NC_005835.1	1649912	1651133	TT_RS08820	+
NC_005835.1	1268704	1268742	38.0188	7.63949	-	NC_005835.1	1268243	1270319	TT_RS06715	-
NC_005835.1	1255372	1255416	51.4315	7.63499	-	NC_005835.1	1255354	1256122	TT_RS06590	-
NC_005835.1	33919	34014	66.5764	7.63135	+	NC_005835.1	32843	34217	TT_RS00175	+
NC_005835.1	299595	299676	100.302	7.62286	-	NC_005835.1	299027	299789	TT_RS01590	-
NC_005835.1	1174718	1174871	61.0649	7.6212	-	NC_005835.1	1174203	1175463	TT_RS06125	-
NC_005835.1	1258811	1258846	36.5478	7.61473	-	NC_005835.1	1258615	1259104	TT_RS06615	-
NC_005835.1	1286600	1286676	37.0739	7.60583	+	NC_005835.1	1286127	1288344	TT_RS06835	+
NC_005835.1	263760	263874	64.1339	7.60297	-	NC_005835.1	263043	263994	TT_RS01415	-
NC_005835.1	406669	406718	37.8737	7.59933	-	NC_005835.1	405922	408310	TT_RS02120	-
NC_005835.1	1233685	1233755	73.538	7.59877	-	NC_005835.1	1232980	1234168	TT_RS06455	-
NC_005835.1	1731001	1731155	60.3536	7.59516	+	NC_005835.1	1729688	1731299	TT_RS09280	+
NC_005835.1	182695	182773	35.9028	7.59394	+	NC_005835.1	179497	187516	TT_RS01015	+
NC_005835.1	1346138	1346199	35.886	7.59287	-	NC_005835.1	1345789	1347040	TT_RS07175	-
NC_005835.1	34042	34132	43.5745	7.58808	+	NC_005835.1	32843	34217	TT_RS00175	+
NC_005835.1	1381775	1381987	48.7617	7.58507	-	NC_005835.1	1377887	1382462	TT_RS07380	-
NC_005835.1	1631421	1631468	99.0194	7.58391	+	NC_005835.1	1630034	1631666	TT_RS08700	+
NC_005835.1	1278416	1278451	179.48	7.57885	-	NC_005835.1	1278358	1278451	TT_RS06780	-
NC_005835.1	1466897	1466960	35.01	7.57549	-	NC_005835.1	1466444	1467479	TT_RS07780	-
NC_005835.1	165465	165496	60.8789	7.57324	+	NC_005835.1	165396	165594	TT_RS00935	+
NC_005835.1	1254688	1254745	147.296	7.56235	-	NC_005835.1	1254612	1254993	TT_RS06575	-
NC_005835.1	653379	653413	61.1064	7.55751	+	NC_005835.1	653359	654217	TT_RS03390	+
NC_005835.1	1286956	1286996	39.5451	7.54415	+	NC_005835.1	1286127	1288344	TT_RS06835	+
NC_005835.1	1168489	1168568	38.8425	7.54056	-	NC_005835.1	1166785	1169536	TT_RS06085	-
NC_005835.1	224426	224503	40.6194	7.53989	-	NC_005835.1	223332	224958	TT_RS01195	-
NC_005835.1	1401220	1401341	48.0953	7.53975	-	NC_005835.1	1400967	1401651	TT_RS07475	-
NC_005835.1	1264457	1264541	34.0896	7.53784	-	NC_005835.1	1264224	1265055	TT_RS06685	-
NC_005835.1	704200	704271	34.7079	7.53626	+	NC_005835.1	704083	705103	TT_RS03655	+
NC_005835.1	1654914	1654954	35.1491	7.53377	+	NC_005835.1	1654891	1655338	TT_RS08870	+
NC_005838.1	101823	102113	48.6324	7.53277	+	NC_005838.1	101656	103567	TT_RS10680	+
NC_005835.1	1631123	1631181	89.647	7.53255	+	NC_005835.1	1630034	1631666	TT_RS08700	+
NC_005835.1	339840	339858	69.1949	7.53246	+	NC_005835.1	339637	341689	TT_RS01800	+
NC_005835.1	1259141	1259190	35.5545	7.5324	-	NC_005835.1	1259116	1259455	TT_RS06620	-
NC_005835.1	740274	740335	45.5981	7.52859	-	NC_005835.1	740160	740499	TT_RS03840	-
NC_005835.1	556364	556451	36.3677	7.52139	+	NC_005835.1	555834	556868	TT_RS11370	+
NC_005835.1	1122612	1122711	49.8659	7.51444	+	NC_005835.1	1122100	1123492	TT_RS05840	+
NC_005838.1	93930	93999	33.5497	7.51372	+	NC_005838.1	92781	95199	TT_RS10645	+
NC_005835.1	1253591	1253629	50.8723	7.51211	-	NC_005835.1	1253544	1254174	TT_RS06565	-
NC_005835.1	904286	904346	33.5355	7.51161	-	NC_005835.1	902447	905348	TT_RS04665	-
NC_005835.1	1808295	1808332	34.0828	7.5102	-	NC_005835.1	1807821	1808349	TT_RS09665	-
NC_005835.1	1808295	1808332	34.0828	7.5102	-	NC_005835.1	1808313	1808390	TT_RS09670	-
NC_005835.1	1681176	1681214	46.7228	7.50208	+	NC_005835.1	1681160	1681592	TT_RS09025	+
NC_005835.1	298430	298495	54.1712	7.49505	-	NC_005835.1	298380	299031	TT_RS01585	-
NC_005835.1	184234	184327	43.5183	7.49239	+	NC_005835.1	179497	187516	TT_RS01015	+
NC_005835.1	1631211	1631252	131.642	7.48871	+	NC_005835.1	1630034	1631666	TT_RS08700	+
NC_005835.1	1654629	1654669	47.3071	7.48817	+	NC_005835.1	1654614	1654881	TT_RS08865	+
NC_005838.1	7795	7881	78.8513	7.48683	+	NC_005838.1	7757	8969	TT_RS10185	+
NC_005835.1	297150	297199	51.0146	7.48442	-	NC_005835.1	296983	297724	TT_RS01575	-
NC_005835.1	184751	184801	40.7796	7.47583	+	NC_005835.1	179497	187516	TT_RS01015	+
NC_005835.1	1265953	1265993	45.8809	7.4751	-	NC_005835.1	1265393	1266011	TT_RS06695	-
NC_005835.1	1808357	1808390	48.4445	7.47482	-	NC_005835.1	1808313	1808390	TT_RS09670	-
NC_005835.1	1387804	1387849	33.9363	7.47459	-	NC_005835.1	1387116	1388154	TT_RS07400	-
NC_005835.1	1378293	1378343	32.5801	7.47236	-	NC_005835.1	1377887	1382462	TT_RS07380	-
NC_005835.1	1557765	1557845	74.9057	7.4723	+	NC_005835.1	1557491	1557941	TT_RS08295	+
NC_005835.1	184917	185007	42.2144	7.46944	+	NC_005835.1	179497	187516	TT_RS01015	+
NC_005835.1	300732	300794	95.073	7.46373	-	NC_005835.1	299799	301557	TT_RS01595	-
NC_005835.1	1709652	1709738	34.3799	7.46365	+	NC_005835.1	1709501	1710764	TT_RS09165	+
NC_005835.1	1654232	1654278	61.8113	7.46043	+	NC_005835.1	1653826	1654618	TT_RS08860	+
NC_005835.1	1346232	1346297	32.2654	7.4566	-	NC_005835.1	1345789	1347040	TT_RS07175	-
NC_005838.1	6355	6387	37.7121	7.44075	+	NC_005838.1	5965	7066	TT_RS10175	+
NC_005835.1	1130806	1130974	52.9526	7.43985	-	NC_005835.1	1130050	1131007	TT_RS05875	-
NC_005838.1	108030	108133	44.6243	7.43688	+	NC_005838.1	107990	109076	TT_RS10710	+
NC_005835.1	180290	180357	34.494	7.43686	+	NC_005835.1	179497	187516	TT_RS01015	+
NC_005835.1	653734	653769	34.9023	7.42507	+	NC_005835.1	653359	654217	TT_RS03390	+
NC_005835.1	561474	561553	35.2726	7.42242	-	NC_005835.1	561058	562092	TT_RS11375	-
NC_005835.1	1381293	1381468	47.5557	7.42048	-	NC_005835.1	1377887	1382462	TT_RS07380	-
NC_005835.1	1381202	1381259	43.9697	7.41711	-	NC_005835.1	1377887	1382462	TT_RS07380	-
NC_005835.1	1552215	1552272	31.9142	7.4128	-	NC_005835.1	1551649	1553476	TT_RS08260	-
NC_005835.1	987937	987956	172.101	7.41277	+	NC_005835.1	987922	987999	TT_RS05100	+
NC_005835.1	886408	886445	46.2872	7.40838	-	NC_005835.1	886375	887047	TT_RS04580	-
NC_005835.1	1224062	1224109	34.2396	7.40633	-	NC_005835.1	1223976	1225845	TT_RS06415	-
NC_005838.1	91488	91567	34.6097	7.40416	-	NC_005838.1	91070	92104	TT_RS11505	-
NC_005835.1	1729915	1729962	31.9881	7.40252	+	NC_005835.1	1729688	1731299	TT_RS09280	+
NC_005835.1	342038	342123	47.0996	7.39335	+	NC_005835.1	341821	342397	TT_RS01805	+
NC_005835.1	544998	545031	43.3155	7.38971	+	NC_005835.1	544998	545075	TT_RS02830	+
NC_005835.1	920353	920407	31.6945	7.38513	-	NC_005835.1	919761	920631	TT_RS04750	-
NC_005835.1	183514	183712	36.1488	7.38479	+	NC_005835.1	179497	187516	TT_RS01015	+
NC_005838.1	7612	7687	75.7871	7.37636	+	NC_005838.1	7100	7757	TT_RS10180	+
NC_005835.1	1347423	1347452	50.3866	7.37334	-	NC_005835.1	1347310	1347616	TT_RS07185	-
NC_005835.1	1475500	1475578	30.131	7.36388	-	NC_005835.1	1474922	1476137	TT_RS07840	-
NC_005835.1	299511	299566	66.5337	7.36235	-	NC_005835.1	299027	299789	TT_RS01590	-
NC_005835.1	1267249	1267422	138.434	7.36186	-	NC_005835.1	1266965	1268186	TT_RS06710	-
NC_005835.1	155937	156008	30.0814	7.36128	-	NC_005835.1	155469	157680	TT_RS00885	-
NC_005835.1	845381	845487	38.2605	7.36112	+	NC_005835.1	845299	846034	TT_RS04405	+
NC_005835.1	1336071	1336149	30.6655	7.3552	-	NC_005835.1	1335801	1336659	TT_RS07110	-
NC_005835.1	1253464	1253510	42.292	7.35434	-	NC_005835.1	1252578	1253526	TT_RS06560	-
NC_005835.1	893991	894037	30.2253	7.35432	-	NC_005835.1	892485	894444	TT_RS04615	-
NC_005835.1	128370	128486	46.3535	7.35298	+	NC_005835.1	128352	129233	TT_RS00745	+
NC_005838.1	6814	6842	31.4761	7.35287	+	NC_005838.1	5965	7066	TT_RS10175	+
NC_005835.1	1254449	1254492	42.3583	7.35113	-	NC_005835.1	1254186	1254576	TT_RS06570	-
NC_005835.1	1256132	1256156	29.5758	7.34108	-	NC_005835.1	1256121	1256682	TT_RS06595	-
NC_005835.1	586894	586949	33.733	7.33752	-	NC_005835.1	586767	588774	TT_RS03065	-
NC_005835.1	1071587	1071608	50.8385	7.3342	-	NC_005835.1	1071532	1071608	TT_RS05575	-
NC_005835.1	1258399	1258443	29.4725	7.33032	-	NC_005835.1	1258003	1258456	TT_RS06605	-
NC_005835.1	654079	654141	36.8398	7.32608	+	NC_005835.1	653359	654217	TT_RS03390	+
NC_005835.1	1167913	1167987	35.8827	7.32488	-	NC_005835.1	1166785	1169536	TT_RS06085	-
NC_005835.1	699370	699477	43.7899	7.32353	+	NC_005835.1	698957	700274	TT_RS03630	+
NC_005835.1	1255805	1255822	29.1629	7.31694	-	NC_005835.1	1255354	1256122	TT_RS06590	-
NC_005835.1	1474481	1474563	30.8901	7.31386	-	NC_005835.1	1474346	1474913	TT_RS07835	-
NC_005835.1	181462	181588	42.5117	7.31053	+	NC_005835.1	179497	187516	TT_RS01015	+
NC_005835.1	1259831	1259919	37.6088	7.31011	-	NC_005835.1	1259466	1260009	TT_RS06625	-
NC_005835.1	340979	341081	164.467	7.30389	+	NC_005835.1	339637	341689	TT_RS01800	+
NC_005838.1	10687	10740	41.6413	7.30019	+	NC_005838.1	10381	11245	TT_RS10200	+
NC_005835.1	1761397	1761494	50.1746	7.29775	+	NC_005835.1	1761389	1763210	TT_RS09445	+
NC_005835.1	182507	182617	45.4484	7.2967	+	NC_005835.1	179497	187516	TT_RS01015	+
NC_005835.1	1267522	1267571	102.497	7.29556	-	NC_005835.1	1266965	1268186	TT_RS06710	-
NC_005835.1	91326	91422	51.9398	7.28785	+	NC_005835.1	91248	92232	TT_RS00510	+
NC_005835.1	1228578	1228645	28.3625	7.28364	+	NC_005835.1	1228563	1229280	TT_RS06435	+
NC_005835.1	664215	664378	29.0871	7.28236	-	NC_005835.1	662914	664393	TT_RS03455	-
NC_005835.1	1382224	1382258	29.0871	7.28236	-	NC_005835.1	1377887	1382462	TT_RS07380	-
NC_005835.1	699150	699282	47.8945	7.27832	+	NC_005835.1	698957	700274	TT_RS03630	+
NC_005835.1	1615397	1615442	29.1241	7.27686	+	NC_005835.1	1614584	1615952	TT_RS08630	+
NC_005835.1	1555213	1555290	28.0332	7.26706	+	NC_005835.1	1554830	1555637	TT_RS08275	+
NC_005835.1	1259394	1259440	28.3533	7.26409	-	NC_005835.1	1259116	1259455	TT_RS06620	-
NC_005835.1	1463350	1463395	29.9739	7.26145	-	NC_005835.1	1463158	1464037	TT_RS07765	-
NC_005835.1	1630056	1630085	100.304	7.26103	+	NC_005835.1	1630034	1631666	TT_RS08700	+
NC_005835.1	1577241	1577388	41.9706	7.25624	+	NC_005835.1	1576802	1577624	TT_RS08430	+
NC_005835.1	1275760	1275799	29.6431	7.25009	-	NC_005835.1	1275337	1276120	TT_RS06760	-
NC_005835.1	918118	918293	54.56	7.24874	-	NC_005835.1	917699	919169	TT_RS04740	-
NC_005835.1	1160794	1160834	39.6687	7.24537	-	NC_005835.1	1160190	1160853	TT_RS06050	-
NC_005835.1	1532240	1532288	36.5452	7.24316	-	NC_005835.1	1531941	1532586	TT_RS08165	-
NC_005835.1	848565	848618	39.7025	7.24181	-	NC_005835.1	848117	849173	TT_RS04420	-
NC_005835.1	1212727	1212781	27.5854	7.24093	-	NC_005835.1	1212681	1213152	TT_RS06350	-
NC_005838.1	15681	15773	27.6572	7.2382	+	NC_005838.1	15093	15942	TT_RS10230	+
NC_005835.1	127546	127652	49.5341	7.2347	+	NC_005835.1	126617	128348	TT_RS00740	+
NC_005835.1	1414168	1414202	27.7297	7.2327	+	NC_005835.1	1412981	1414388	TT_RS07520	+
NC_005835.1	703111	703196	28.5753	7.23167	+	NC_005835.1	703018	704087	TT_RS03650	+
NC_005835.1	1576476	1576537	38.4626	7.22909	+	NC_005835.1	1575876	1576794	TT_RS08425	+
NC_005835.1	917897	917934	31.5328	7.22612	-	NC_005835.1	917699	919169	TT_RS04740	-
NC_005835.1	1265157	1265211	39.0454	7.22282	-	NC_005835.1	1265106	1265397	TT_RS06690	-
NC_005835.1	78591	78658	31.9042	7.21913	+	NC_005835.1	78118	79402	TT_RS00435	+
NC_005835.1	1497275	1497326	61.4251	7.21682	+	NC_005835.1	1497146	1497941	TT_RS07980	+
NC_005835.1	237021	237058	38.1359	7.21632	+	NC_005835.1	236991	238206	TT_RS01270	+
NC_005835.1	1260031	1260143	35.3607	7.21204	-	NC_005835.1	1260008	1260425	TT_RS06630	-
NC_005835.1	1252384	1252437	42.3153	7.20638	-	NC_005835.1	1252217	1252574	TT_RS06555	-
NC_005835.1	1389465	1389574	49.8936	7.20312	-	NC_005835.1	1388165	1389890	TT_RS07405	-
NC_005838.1	9654	9686	40.9022	7.19338	+	NC_005838.1	9633	10377	TT_RS10195	+
NC_005835.1	1439016	1439113	35.095	7.19337	-	NC_005835.1	1438772	1440752	TT_RS07650	-
NC_005835.1	733192	733254	26.7401	7.18897	-	NC_005835.1	733118	734051	TT_RS03795	-
NC_005835.1	1654138	1654147	27.2167	7.1864	+	NC_005835.1	1653826	1654618	TT_RS08860	+
NC_005835.1	1464988	1465055	37.6987	7.18605	-	NC_005835.1	1464036	1465599	TT_RS07770	-
NC_005835.1	1144225	1144287	30.2081	7.18603	+	NC_005835.1	1144119	1145643	TT_RS11410	+
NC_005835.1	683724	683779	28.7663	7.18345	-	NC_005835.1	683285	684419	TT_RS03555	-
NC_005835.1	994973	995018	42.5705	7.18237	+	NC_005835.1	994960	997234	TT_RS05145	+
NC_005835.1	1249987	1250010	30.5792	7.18012	-	NC_005835.1	1248817	1250179	TT_RS06535	-
NC_005835.1	386277	386321	52.7599	7.17793	-	NC_005835.1	386258	386918	TT_RS02020	-
NC_005835.1	1269949	1269993	26.3744	7.17565	-	NC_005835.1	1268243	1270319	TT_RS06715	-
NC_005835.1	1759889	1759925	26.3744	7.17565	-	NC_005835.1	1759751	1761029	TT_RS09435	-
NC_005835.1	484828	484868	45.9104	7.17431	+	NC_005835.1	484819	486016	TT_RS02530	+
NC_005835.1	889819	889887	30.9508	7.17266	-	NC_005835.1	888504	890241	TT_RS04590	-
NC_005835.1	467888	467990	27.6975	7.1689	+	NC_005835.1	467126	469583	TT_RS02430	+
NC_005835.1	437973	438002	26.1283	7.16776	-	NC_005835.1	437236	438010	TT_RS02275	-
NC_005838.1	73481	73493	27.3291	7.16512	+	NC_005838.1	72919	73609	TT_RS10530	+
NC_005835.1	341852	341938	43.8714	7.16117	+	NC_005835.1	341821	342397	TT_RS01805	+
NC_005838.1	107613	107681	26.1169	7.15597	+	NC_005838.1	106246	108001	TT_RS10705	+
NC_005835.1	1574748	1574905	57.745	7.1552	+	NC_005835.1	1574486	1575296	TT_RS08415	+
NC_005835.1	1265577	1265613	29.215	7.15444	-	NC_005835.1	1265393	1266011	TT_RS06695	-
NC_005838.1	5866	5944	60.6492	7.15426	+	NC_005838.1	5306	5969	TT_RS10170	+
NC_005835.1	1259034	1259069	37.5722	7.15407	-	NC_005835.1	1258615	1259104	TT_RS06615	-
NC_005835.1	165660	165704	55.9043	7.15342	+	NC_005835.1	165605	165962	TT_RS00940	+
NC_005835.1	1454733	1454801	141.159	7.14926	-	NC_005835.1	1454320	1457167	TT_RS07725	-
NC_005835.1	1256173	1256211	37.2954	7.14885	-	NC_005835.1	1256121	1256682	TT_RS06595	-
NC_005835.1	891098	891165	36.1611	7.14769	-	NC_005835.1	890570	891542	TT_RS04600	-
NC_005835.1	1760928	1760961	28.884	7.14359	-	NC_005835.1	1759751	1761029	TT_RS09435	-
NC_005835.1	1162972	1163052	34.0572	7.14282	-	NC_005835.1	1162777	1163734	TT_RS06065	-
NC_005835.1	1386710	1386845	66.7807	7.13939	-	NC_005835.1	1386681	1387110	TT_RS07395	-
NC_005835.1	338488	338547	25.8235	7.1377	+	NC_005835.1	338360	339254	TT_RS01790	+
NC_005835.1	1314303	1314342	44.7082	7.13715	-	NC_005835.1	1314283	1314661	TT_RS07000	-
NC_005835.1	1677790	1677860	35.9618	7.13615	+	NC_005835.1	1677316	1678426	TT_RS09005	+
NC_005835.1	182901	182961	40.079	7.13259	+	NC_005835.1	179497	187516	TT_RS01015	+
NC_005835.1	1233010	1233119	62.1161	7.13186	-	NC_005835.1	1232980	1234168	TT_RS06455	-
NC_005835.1	1605833	1605865	37.8333	7.1314	-	NC_005835.1	1605359	1606430	TT_RS08580	-
NC_005835.1	1249417	1249461	48.0399	7.13129	-	NC_005835.1	1248817	1250179	TT_RS06535	-
NC_005835.1	920656	920751	31.568	7.12973	-	NC_005835.1	920634	920967	TT_RS04755	-
NC_005835.1	1389597	1389876	89.6919	7.1286	-	NC_005835.1	1388165	1389890	TT_RS07405	-
NC_005835.1	1264328	1264410	25.3507	7.127	-	NC_005835.1	1264224	1265055	TT_RS06685	-
NC_005835.1	237805	237868	46.7467	7.12391	+	NC_005835.1	236991	238206	TT_RS01270	+
NC_005835.1	1266056	1266130	35.6668	7.12381	-	NC_005835.1	1266022	1266643	TT_RS06700	-
NC_005838.1	160693	160777	58.1573	7.12143	+	NC_005838.1	160288	160978	TT_RS10910	+
NC_005835.1	894512	894567	35.7318	7.1214	-	NC_005835.1	894440	894803	TT_RS04620	-
NC_005835.1	1484056	1484127	28.2223	7.12139	+	NC_005835.1	1483174	1484287	TT_RS07905	+
NC_005835.1	1650675	1650848	146.33	7.11324	+	NC_005835.1	1649912	1651133	TT_RS08820	+
NC_005835.1	1729279	1729331	58.3081	7.11008	-	NC_005835.1	1728911	1729424	TT_RS09270	-
NC_005835.1	975384	975467	49.3616	7.10915	+	NC_005835.1	975176	975785	TT_RS05020	+
NC_005835.1	33389	33456	54.3645	7.10433	+	NC_005835.1	32843	34217	TT_RS00175	+
NC_005835.1	1288368	1288418	25.2007	7.10345	+	NC_005835.1	1288363	1290547	TT_RS06840	+
NC_005835.1	217148	217316	56.5695	7.10094	-	NC_005835.1	216032	217478	TT_RS01160	-
NC_005835.1	224529	224582	26.8214	7.10015	-	NC_005835.1	223332	224958	TT_RS01195	-
NC_005835.1	1256057	1256108	50.4135	7.09999	-	NC_005835.1	1255354	1256122	TT_RS06590	-
NC_005835.1	888012	888070	26.4524	7.09849	-	NC_005835.1	887057	888494	TT_RS04585	-
NC_005838.1	73322	73402	60.1324	7.09116	+	NC_005838.1	72919	73609	TT_RS10530	+
NC_005835.1	43384	43442	24.6577	7.09012	-	NC_005835.1	43346	43589	TT_RS00225	-
NC_005835.1	1415916	1415989	83.1498	7.08065	+	NC_005835.1	1415738	1416041	TT_RS07530	+
NC_005835.1	1533556	1533638	49.4988	7.0801	-	NC_005835.1	1533350	1534040	TT_RS08175	-
NC_005835.1	1465128	1465175	24.9761	7.07225	-	NC_005835.1	1464036	1465599	TT_RS07770	-
NC_005835.1	253654	253684	24.329	7.07139	-	NC_005835.1	253609	253686	TT_RS01350	-
NC_005835.1	1070751	1070826	23.9935	7.07096	-	NC_005835.1	1070448	1071487	TT_RS05570	-
NC_005835.1	1389908	1389982	73.8731	7.06868	-	NC_005835.1	1389890	1390913	TT_RS07410	-
NC_005835.1	1080928	1080984	24.5782	7.06836	-	NC_005835.1	1080082	1081243	TT_RS05600	-
NC_005835.1	894060	894172	40.3253	7.06836	-	NC_005835.1	892485	894444	TT_RS04615	-
NC_005835.1	1606268	1606329	66.8927	7.06615	-	NC_005835.1	1605359	1606430	TT_RS08580	-
NC_005835.1	1371315	1371395	53.0422	7.06394	+	NC_005835.1	1370909	1371599	TT_RS07325	+
NC_005838.1	6176	6246	68.6934	7.06147	+	NC_005838.1	5965	7066	TT_RS10175	+
NC_005835.1	1730210	1730256	32.0536	7.06113	+	NC_005835.1	1729688	1731299	TT_RS09280	+
NC_005835.1	355225	355311	30.5461	7.06082	+	NC_005835.1	354832	356071	TT_RS01875	+
NC_005835.1	1266822	1266891	24.6516	7.05964	-	NC_005835.1	1266639	1266957	TT_RS06705	-
NC_005835.1	1224594	1224684	43.0367	7.05751	-	NC_005835.1	1223976	1225845	TT_RS06415	-
NC_005835.1	972454	972495	24.2125	7.0548	+	NC_005835.1	971722	974140	TT_RS05000	+
NC_005835.1	67861	67918	40.7229	7.05461	-	NC_005835.1	67792	67942	TT_RS00380	-
NC_005835.1	1270333	1270386	41.2567	7.05424	-	NC_005835.1	1270321	1270792	TT_RS06720	-
NC_005835.1	293625	293710	25.0935	7.05392	-	NC_005835.1	293203	294112	TT_RS01555	-
NC_005835.1	891299	891330	25.5	7.0486	-	NC_005835.1	890570	891542	TT_RS04600	-
NC_005835.1	658447	658510	36.2759	7.03965	-	NC_005835.1	658017	659322	TT_RS03430	-
NC_005835.1	1128677	1128757	34.3918	7.03875	+	NC_005835.1	1127601	1129188	TT_RS05865	+
NC_005835.1	889190	889277	35.9258	7.03784	-	NC_005835.1	888504	890241	TT_RS04590	-
NC_005835.1	1727048	1727136	34.8258	7.03762	-	NC_005835.1	1726570	1727140	TT_RS09250	-
NC_005835.1	217999	218055	28.4242	7.03376	-	NC_005835.1	217461	218835	TT_RS01165	-
NC_005835.1	1364851	1364897	39.4943	7.03241	+	NC_005835.1	1364844	1365261	TT_RS07295	+
NC_005835.1	1476058	1476106	23.9558	7.03238	-	NC_005835.1	1474922	1476137	TT_RS07840	-
NC_005835.1	183210	183266	25.5775	7.02506	+	NC_005835.1	179497	187516	TT_RS01015	+
NC_005835.1	1577931	1577985	33.1648	7.02485	+	NC_005835.1	1577604	1578831	TT_RS08435	+
NC_005835.1	538326	538398	28.0932	7.02322	+	NC_005835.1	537202	538447	TT_RS02800	+
NC_005835.1	590523	590567	28.0932	7.02322	-	NC_005835.1	590513	591485	TT_RS03085	-
NC_005835.1	1008121	1008170	33.2838	7.02139	-	NC_005835.1	1008088	1008409	TT_RS05215	-
NC_005835.1	722806	722888	23.4831	7.02137	-	NC_005835.1	722513	723059	TT_RS03745	-
NC_005835.1	1063918	1064011	23.4831	7.02137	+	NC_005835.1	1063184	1064108	TT_RS05530	+
NC_005835.1	741440	741503	23.5543	7.02044	-	NC_005835.1	740509	741847	TT_RS03845	-
NC_005835.1	1456731	1456910	117.459	7.02009	-	NC_005835.1	1454320	1457167	TT_RS07725	-
NC_005835.1	1658455	1658511	24.4715	7.01673	+	NC_005835.1	1658319	1659291	TT_RS08890	+
NC_005835.1	1853662	1853741	23.6265	7.0158	+	NC_005835.1	1853656	1853977	TT_RS09900	+
NC_005838.1	102958	103023	32.8559	7.01372	+	NC_005838.1	101656	103567	TT_RS10680	+
NC_005835.1	1268292	1268387	61.025	7.01211	-	NC_005835.1	1268243	1270319	TT_RS06715	-
NC_005838.1	86413	86493	51.7965	7.0103	+	NC_005838.1	86007	86697	TT_RS10595	+
NC_005835.1	44282	44345	24.104	7.01019	-	NC_005835.1	43621	44359	TT_RS00230	-
NC_005838.1	57808	57886	50.9996	7.00888	-	NC_005838.1	57604	58294	TT_RS10455	-
NC_005835.1	1775045	1775118	74.173	7.00823	+	NC_005835.1	1774544	1775453	TT_RS09530	+
NC_005835.1	1269058	1269173	36.7803	7.00643	-	NC_005835.1	1268243	1270319	TT_RS06715	-
NC_005835.1	1726170	1726264	50.6119	7.00528	-	NC_005835.1	1726079	1726574	TT_RS09245	-
NC_005835.1	918313	918402	45.1548	7.00352	-	NC_005835.1	917699	919169	TT_RS04740	-
NC_005835.1	1803602	1803693	23.1544	7.00263	+	NC_005835.1	1802866	1804420	TT_RS09640	+
NC_005835.1	1455390	1455426	71.7338	7.00212	-	NC_005835.1	1454320	1457167	TT_RS07725	-
NC_005835.1	1471797	1471896	23.1194	7.00121	-	NC_005835.1	1471089	1472220	TT_RS07820	-
NC_005835.1	1372548	1372639	28.9436	7.00114	+	NC_005835.1	1372403	1372742	TT_RS07345	+
NC_005835.1	373058	373146	45.7733	6.99886	-	NC_005835.1	372651	373326	TT_RS01950	-
NC_005835.1	1308480	1308578	37.0966	6.99639	-	NC_005835.1	1307595	1308600	TT_RS06960	-
NC_005835.1	1390009	1390065	59.8013	6.99554	-	NC_005835.1	1389890	1390913	TT_RS07410	-
NC_005835.1	903460	903652	52.625	6.99374	-	NC_005835.1	902447	905348	TT_RS04665	-
NC_005835.1	1262538	1262619	25.7469	6.99348	-	NC_005835.1	1262452	1262878	TT_RS06665	-
NC_005838.1	5479	5516	32.8249	6.98366	+	NC_005838.1	5306	5969	TT_RS10170	+
NC_005835.1	237729	237775	49.9471	6.98295	+	NC_005835.1	236991	238206	TT_RS01270	+
NC_005835.1	1651626	1651675	23.4447	6.97949	+	NC_005835.1	1651520	1652075	TT_RS08835	+
NC_005835.1	1751851	1751958	28.1766	6.97851	+	NC_005835.1	1750437	1752084	TT_RS09380	+
NC_005835.1	1188295	1188411	31.3847	6.974	-	NC_005835.1	1188246	1188867	TT_RS06190	-
NC_005835.1	903275	903313	24.6258	6.97259	-	NC_005835.1	902447	905348	TT_RS04665	-
NC_005835.1	197611	197691	23.4822	6.9721	-	NC_005835.1	197538	198669	TT_RS01070	-
NC_005835.1	848431	848517	47.0784	6.97115	-	NC_005835.1	848117	849173	TT_RS04420	-
NC_005835.1	1094826	1095046	25.0935	6.96976	-	NC_005835.1	1094237	1096085	TT_RS05695	-
NC_005835.1	57707	57859	23.078	6.96962	+	NC_005835.1	56881	58363	TT_RS00315	+
NC_005835.1	299995	300136	76.0925	6.96895	-	NC_005835.1	299799	301557	TT_RS01595	-
NC_005835.1	94120	94179	31.717	6.9664	+	NC_005835.1	94043	94241	TT_RS00525	+
NC_005835.1	299307	299372	44.8584	6.96617	-	NC_005835.1	299027	299789	TT_RS01590	-
NC_005835.1	864183	864243	22.5679	6.96563	-	NC_005835.1	863090	866084	TT_RS04490	-
NC_005835.1	1249205	1249255	44.8795	6.96554	-	NC_005835.1	1248817	1250179	TT_RS06535	-
NC_005835.1	129296	129364	34.0108	6.96515	+	NC_005835.1	129229	130960	TT_RS00750	+
NC_005835.1	658663	658725	23.5201	6.96363	-	NC_005835.1	658017	659322	TT_RS03430	-
NC_005835.1	338943	339016	23.1152	6.96363	+	NC_005835.1	338360	339254	TT_RS01790	+
NC_005835.1	60626	60685	25.0353	6.95608	-	NC_005835.1	60533	60974	TT_RS00340	-
NC_005835.1	844274	844323	23.5582	6.95405	+	NC_005835.1	844236	844770	TT_RS04395	+
NC_005835.1	1454539	1454714	87.8259	6.95202	-	NC_005835.1	1454320	1457167	TT_RS07725	-
NC_005835.1	1286358	1286564	72.7467	6.9518	+	NC_005835.1	1286127	1288344	TT_RS06835	+
NC_005835.1	1551778	1551858	22.8056	6.95132	-	NC_005835.1	1551649	1553476	TT_RS08260	-
NC_005835.1	1652922	1652977	32.9565	6.95076	+	NC_005835.1	1652554	1653244	TT_RS08845	+
NC_005835.1	151874	151932	22.7858	6.94742	-	NC_005835.1	150932	152108	TT_RS00865	-
NC_005838.1	9905	10085	75.9616	6.94715	+	NC_005838.1	9633	10377	TT_RS10195	+
NC_005835.1	1249114	1249159	31.2226	6.94538	-	NC_005835.1	1248817	1250179	TT_RS06535	-
NC_005835.1	1391148	1391199	34.8105	6.94333	-	NC_005835.1	1390863	1391460	TT_RS07415	-
NC_005835.1	1345659	1345708	32.2665	6.93608	-	NC_005835.1	1345228	1345789	TT_RS07170	-
NC_005835.1	1588444	1588550	22.8608	6.93293	-	NC_005835.1	1586738	1588565	TT_RS08490	-
NC_005835.1	993225	993276	23.6355	6.93136	+	NC_005835.1	992894	993518	TT_RS05130	+
NC_005835.1	1169003	1169059	31.0525	6.92875	-	NC_005835.1	1166785	1169536	TT_RS06085	-
NC_005835.1	1045747	1045827	33.6584	6.92839	+	NC_005835.1	1043080	1045939	TT_RS05430	+
NC_005835.1	242940	243036	22.0178	6.92505	+	NC_005835.1	241631	245189	TT_RS01290	+
NC_005835.1	1826185	1826234	22.0178	6.92505	-	NC_005835.1	1825704	1826250	TT_RS09755	-
NC_005835.1	1402595	1402739	38.9395	6.92502	-	NC_005835.1	1401660	1404309	TT_RS07480	-
NC_005835.1	1269829	1269897	31.5439	6.92453	-	NC_005835.1	1268243	1270319	TT_RS06715	-
NC_005835.1	1651534	1651560	22.054	6.9224	+	NC_005835.1	1651520	1652075	TT_RS08835	+
NC_005835.1	1347250	1347282	55.8675	6.92138	-	NC_005835.1	1347049	1347307	TT_RS07180	-
NC_005835.1	1313805	1313870	25.1161	6.92081	-	NC_005835.1	1312904	1313885	TT_RS06990	-
NC_005835.1	180159	180249	37.6462	6.9206	+	NC_005835.1	179497	187516	TT_RS01015	+
NC_005835.1	973867	973943	30.6807	6.91789	+	NC_005835.1	971722	974140	TT_RS05000	+
NC_005835.1	1144712	1144813	74.9456	6.91716	+	NC_005835.1	1144119	1145643	TT_RS11410	+
NC_005835.1	407277	407318	22.937	6.91386	-	NC_005835.1	405922	408310	TT_RS02120	-
NC_005835.1	1808224	1808265	22.1273	6.91386	-	NC_005835.1	1807821	1808349	TT_RS09665	-
NC_005835.1	1463008	1463083	25.4877	6.91279	-	NC_005835.1	1462326	1463172	TT_RS07760	-
NC_005835.1	1200334	1200381	22.5691	6.90847	+	NC_005835.1	1200243	1200582	TT_RS06260	+
NC_005835.1	683949	683981	21.6178	6.90739	-	NC_005835.1	683285	684419	TT_RS03555	-
NC_005835.1	975197	975278	50.3549	6.9069	+	NC_005835.1	975176	975785	TT_RS05020	+
NC_005835.1	1256623	1256659	33.4957	6.90633	-	NC_005835.1	1256121	1256682	TT_RS06595	-
NC_005835.1	438253	438286	54.3754	6.90559	-	NC_005835.1	438009	438546	TT_RS02280	-
NC_005835.1	1697571	1697647	23.3446	6.90414	+	NC_005835.1	1697046	1698126	TT_RS09105	+
NC_005835.1	1304921	1305004	23.7142	6.90359	+	NC_005835.1	1304657	1305074	TT_RS06935	+
NC_005835.1	1402041	1402216	31.2989	6.89889	-	NC_005835.1	1401660	1404309	TT_RS07480	-
NC_005835.1	886793	886871	64.4103	6.89739	-	NC_005835.1	886375	887047	TT_RS04580	-
NC_005835.1	1522750	1522881	24.8779	6.89283	-	NC_005835.1	1521173	1522967	TT_RS08125	-
NC_005835.1	1478513	1478599	30.9563	6.89097	+	NC_005835.1	1478179	1479850	TT_RS07870	+
NC_005838.1	7900	7937	26.2329	6.88986	+	NC_005838.1	7757	8969	TT_RS10185	+
NC_005835.1	1437631	1437673	24.8265	6.88874	-	NC_005835.1	1436788	1437976	TT_RS07640	-
NC_005835.1	237185	237305	101.045	6.88605	+	NC_005835.1	236991	238206	TT_RS01270	+
NC_005835.1	386436	386506	42.5017	6.88543	-	NC_005835.1	386258	386918	TT_RS02020	-
NC_005835.1	60245	60417	52.2551	6.88496	-	NC_005835.1	59619	60534	TT_RS00335	-
NC_005835.1	180806	180880	49.7352	6.88433	+	NC_005835.1	179497	187516	TT_RS01015	+
NC_005835.1	659127	659192	34.628	6.88234	-	NC_005835.1	658017	659322	TT_RS03430	-
NC_005835.1	1270444	1270498	36.2598	6.87925	-	NC_005835.1	1270321	1270792	TT_RS06720	-
NC_005835.1	658739	658870	33.3634	6.87874	-	NC_005835.1	658017	659322	TT_RS03430	-
NC_005835.1	1065315	1065370	21.4693	6.87867	-	NC_005835.1	1065070	1065451	TT_RS05540	-
NC_005835.1	1380984	1381023	31.7834	6.87671	-	NC_005835.1	1377887	1382462	TT_RS07380	-
NC_005835.1	1764942	1764982	31.7834	6.87671	-	NC_005835.1	1764534	1764999	TT_RS09460	-
NC_005835.1	1470229	1470271	23.0541	6.87585	-	NC_005835.1	1469387	1470650	TT_RS07805	-
NC_005835.1	1130526	1130614	36.3025	6.87489	-	NC_005835.1	1130050	1131007	TT_RS05875	-
NC_005835.1	719038	719092	26.6065	6.87472	+	NC_005835.1	717957	719145	TT_RS03725	+
NC_005835.1	1381485	1381684	71.5869	6.87428	-	NC_005835.1	1377887	1382462	TT_RS07380	-
NC_005835.1	1412605	1412656	42.2518	6.87323	+	NC_005835.1	1412232	1412985	TT_RS07515	+
NC_005835.1	409729	409809	46.157	6.87248	-	NC_005835.1	409102	409849	TT_RS02130	-
NC_005835.1	1285234	1285390	38.2164	6.87191	+	NC_005835.1	1285062	1286131	TT_RS06830	+
NC_005835.1	1249519	1249632	92.563	6.87066	-	NC_005835.1	1248817	1250179	TT_RS06535	-
NC_005835.1	1123933	1124046	23.7944	6.87017	-	NC_005835.1	1123477	1124398	TT_RS05845	-
NC_005835.1	1262914	1262991	29.8758	6.86732	-	NC_005835.1	1262881	1263601	TT_RS06670	-
NC_005835.1	1364933	1364963	20.9967	6.8673	+	NC_005835.1	1364844	1365261	TT_RS07295	+
NC_005835.1	964138	964184	32.5462	6.86618	-	NC_005835.1	963992	964757	TT_RS04950	-
NC_005835.1	386329	386354	20.9615	6.86616	-	NC_005835.1	386258	386918	TT_RS02020	-
NC_005835.1	1575553	1575660	48.2808	6.86132	+	NC_005835.1	1575301	1575880	TT_RS08420	+
NC_005835.1	168868	168959	53.9933	6.86045	-	NC_005835.1	168830	169445	TT_RS00960	-
NC_005835.1	1268755	1268782	29.3215	6.86042	-	NC_005835.1	1268243	1270319	TT_RS06715	-
NC_005835.1	1631360	1631381	81.4078	6.85935	+	NC_005835.1	1630034	1631666	TT_RS08700	+
NC_005838.1	6252	6342	128.981	6.8593	+	NC_005838.1	5965	7066	TT_RS10175	+
NC_005835.1	1730722	1730762	31.4905	6.85694	+	NC_005835.1	1729688	1731299	TT_RS09280	+
NC_005835.1	961823	961854	21.9866	6.85693	-	NC_005835.1	961811	962945	TT_RS04940	-
NC_005835.1	1347502	1347568	126.883	6.85493	-	NC_005835.1	1347310	1347616	TT_RS07185	-
NC_005835.1	300354	300386	44.4632	6.8542	-	NC_005835.1	299799	301557	TT_RS01595	-
NC_005835.1	1869381	1869468	21.6189	6.8511	+	NC_005835.1	1869150	1869732	TT_RS10000	+
NC_005835.1	297826	297866	30.0977	6.84994	-	NC_005835.1	297724	298393	TT_RS01580	-
NC_005835.1	421170	421322	27.5971	6.8495	-	NC_005835.1	420139	421450	TT_RS02190	-
NC_005835.1	1314562	1314596	36.622	6.84701	-	NC_005835.1	1314283	1314661	TT_RS07000	-
NC_005835.1	1245921	1245972	22.3942	6.84699	-	NC_005835.1	1245375	1245999	TT_RS06510	-
NC_005835.1	1477493	1477516	68.211	6.84666	-	NC_005835.1	1477442	1477516	TT_RS07860	-
NC_005835.1	1651355	1651402	20.6336	6.84462	+	NC_005835.1	1651341	1651524	TT_RS08830	+
NC_005835.1	1733175	1733326	21.2518	6.84285	+	NC_005835.1	1731470	1734107	TT_RS09285	+
NC_005835.1	1224925	1224951	20.8118	6.84166	-	NC_005835.1	1223976	1225845	TT_RS06415	-
NC_005835.1	1497672	1497704	49.9037	6.83755	+	NC_005835.1	1497146	1497941	TT_RS07980	+
NC_005835.1	905480	905541	36.4642	6.83753	-	NC_005835.1	905328	906447	TT_RS04670	-
NC_005835.1	1365669	1365773	37.4948	6.83701	+	NC_005835.1	1365271	1366492	TT_RS07300	+
NC_005835.1	1606349	1606428	56.2837	6.83657	-	NC_005835.1	1605359	1606430	TT_RS08580	-
NC_005835.1	1287473	1287624	75.219	6.83566	+	NC_005835.1	1286127	1288344	TT_RS06835	+
NC_005835.1	1267117	1267153	73.0439	6.83393	-	NC_005835.1	1266965	1268186	TT_RS06710	-
NC_005835.1	1683027	1683087	56.4073	6.83216	-	NC_005835.1	1682778	1683156	TT_RS09035	-
NC_005835.1	1676807	1676871	30.2253	6.83032	+	NC_005835.1	1676375	1677314	TT_RS09000	+
NC_005835.1	180397	180434	25.2831	6.83031	+	NC_005835.1	179497	187516	TT_RS01015	+
NC_005835.1	1470524	1470605	20.9865	6.8297	-	NC_005835.1	1469387	1470650	TT_RS07805	-
NC_005835.1	1817785	1817905	20.9865	6.8297	-	NC_005835.1	1817756	1819577	TT_RS09720	-
NC_005835.1	333549	333707	35.0109	6.82848	-	NC_005835.1	332905	334621	TT_RS01765	-
NC_005835.1	1225783	1225820	28.6467	6.8276	-	NC_005835.1	1223976	1225845	TT_RS06415	-
NC_005835.1	1539258	1539316	20.4113	6.82607	-	NC_005835.1	1538332	1539334	TT_RS08200	-
NC_005835.1	178126	178178	21.3277	6.82486	+	NC_005835.1	177672	179184	TT_RS01005	+
NC_005835.1	52638	52748	20.3407	6.82486	+	NC_005835.1	52175	52793	TT_RS00280	+
NC_005835.1	1373011	1373053	20.3407	6.82486	+	NC_005835.1	1372707	1373511	TT_RS07350	+
NC_005835.1	893572	893657	30.8735	6.82451	-	NC_005835.1	892485	894444	TT_RS04615	-
NC_005835.1	1259924	1259975	36.749	6.82306	-	NC_005835.1	1259466	1260009	TT_RS06625	-
NC_005835.1	127935	127993	20.4832	6.82243	+	NC_005835.1	126617	128348	TT_RS00740	+
NC_005835.1	1248600	1248745	93.8769	6.82092	-	NC_005835.1	1248045	1248816	TT_RS06530	-
NC_005835.1	60167	60202	20.5197	6.81876	-	NC_005835.1	59619	60534	TT_RS00335	-
NC_005835.1	1657687	1657772	33.492	6.81839	+	NC_005835.1	1657676	1658330	TT_RS08885	+
NC_005835.1	1168143	1168181	20.9604	6.81754	-	NC_005835.1	1166785	1169536	TT_RS06085	-
NC_005835.1	957607	957655	21.7348	6.81692	-	NC_005835.1	957042	958215	TT_RS04925	-
NC_005835.1	1067943	1068021	104.154	6.81508	-	NC_005835.1	1067877	1068264	TT_RS05555	-
NC_005835.1	739761	739789	20.5566	6.81385	-	NC_005835.1	739721	740177	TT_RS03835	-
NC_005835.1	1665131	1665194	22.8445	6.81138	-	NC_005835.1	1664233	1665589	TT_RS08925	-
NC_005835.1	1831790	1831822	236.946	6.81066	+	NC_005835.1	1831790	1831866	TT_RS09800	+
NC_005838.1	15154	15216	20.9984	6.80828	+	NC_005838.1	15093	15942	TT_RS10230	+
NC_005835.1	157434	157470	20.1189	6.80454	-	NC_005835.1	155469	157680	TT_RS00885	-
NC_005835.1	1070652	1070708	20.0479	6.80454	-	NC_005835.1	1070448	1071487	TT_RS05570	-
NC_005835.1	1391955	1392077	27.0458	6.80338	-	NC_005835.1	1391456	1392641	TT_RS07420	-
NC_005835.1	373881	373960	28.1498	6.80268	-	NC_005835.1	373313	374165	TT_RS01955	-
NC_005835.1	1288679	1288726	20.013	6.80266	+	NC_005835.1	1288363	1290547	TT_RS06840	+
NC_005835.1	1469607	1469743	47.92	6.80177	-	NC_005835.1	1469387	1470650	TT_RS07805	-
NC_005835.1	739007	739071	22.1439	6.80141	-	NC_005835.1	738872	739721	TT_RS03830	-
NC_005835.1	1496826	1496886	22.1439	6.80141	-	NC_005835.1	1496016	1497081	TT_RS07975	-
NC_005835.1	1206032	1206087	20.1912	6.79952	+	NC_005835.1	1205972	1206584	TT_RS06305	+
NC_005835.1	1415040	1415122	24.8978	6.7958	+	NC_005835.1	1414440	1415736	TT_RS07525	+
NC_005835.1	1457001	1457029	63.7166	6.79518	-	NC_005835.1	1454320	1457167	TT_RS07725	-
NC_005838.1	94165	94239	28.4425	6.79512	+	NC_005838.1	92781	95199	TT_RS10645	+
NC_005835.1	1337223	1337312	25.4176	6.79371	-	NC_005835.1	1337031	1337931	TT_RS07120	-
NC_005835.1	156769	156855	30.114	6.79252	-	NC_005835.1	155469	157680	TT_RS00885	-
NC_005835.1	765676	765704	20.6692	6.7913	-	NC_005835.1	765537	765999	TT_RS03965	-
NC_005835.1	1402279	1402387	40.2076	6.79112	-	NC_005835.1	1401660	1404309	TT_RS07480	-
NC_005835.1	1287373	1287439	41.3156	6.78954	+	NC_005835.1	1286127	1288344	TT_RS06835	+
NC_005835.1	756435	756713	23.1564	6.78808	+	NC_005835.1	755074	756796	TT_RS03930	+
NC_005835.1	63568	63729	44.6394	6.78512	+	NC_005835.1	63182	64526	TT_RS00355	+
NC_005835.1	1385110	1385228	23.5015	6.78469	-	NC_005835.1	1382491	1385851	TT_RS07385	-
NC_005835.1	263335	263425	38.7306	6.78366	-	NC_005835.1	263043	263994	TT_RS01415	-
NC_005835.1	392027	392112	30.0691	6.78364	+	NC_005835.1	392004	393198	TT_RS02050	+
NC_005835.1	1420471	1420578	25.7007	6.78364	+	NC_005835.1	1419651	1421915	TT_RS07555	+
NC_005835.1	35409	35490	22.1843	6.78363	-	NC_005835.1	35265	36240	TT_RS00185	-
NC_005835.1	1721056	1721137	30.6484	6.78236	-	NC_005835.1	1720850	1721903	TT_RS09215	-
NC_005835.1	1263013	1263045	20.3024	6.78234	-	NC_005835.1	1262881	1263601	TT_RS06670	-
NC_005835.1	802248	802320	19.8266	6.78234	-	NC_005835.1	802233	804321	TT_RS04145	-
NC_005835.1	67777	67813	20.1047	6.78105	-	NC_005835.1	67792	67942	TT_RS00380	-
NC_005835.1	67777	67813	20.1047	6.78105	-	NC_005835.1	67454	67826	TT_RS11295	-
NC_005835.1	1168932	1168979	19.6855	6.77976	-	NC_005835.1	1166785	1169536	TT_RS06085	-
NC_005835.1	145843	146018	43.6041	6.77931	-	NC_005835.1	144754	146026	TT_RS00835	-
NC_005835.1	905625	905708	31.3776	6.77589	-	NC_005835.1	905328	906447	TT_RS04670	-
NC_005835.1	1749557	1749658	19.9954	6.77575	+	NC_005835.1	1749272	1750460	TT_RS09375	+
NC_005835.1	1746404	1746515	19.8437	6.77392	+	NC_005835.1	1744979	1746419	TT_RS09345	+
NC_005835.1	1746404	1746515	19.8437	6.77392	+	NC_005835.1	1746403	1746832	TT_RS09350	+
NC_005835.1	1057774	1057815	21.4843	6.77196	+	NC_005835.1	1057418	1057973	TT_RS05495	+
NC_005835.1	1437006	1437058	23.6299	6.77066	-	NC_005835.1	1436788	1437976	TT_RS07640	-
NC_005835.1	1381027	1381063	30.6845	6.76969	-	NC_005835.1	1377887	1382462	TT_RS07380	-
NC_005835.1	1292261	1292339	21.8544	6.76935	+	NC_005835.1	1291242	1293639	TT_RS06855	+
NC_005835.1	185651	185725	25.149	6.76779	+	NC_005835.1	179497	187516	TT_RS01015	+
NC_005835.1	1650591	1650649	142.29	6.76658	+	NC_005835.1	1649912	1651133	TT_RS08820	+
NC_005835.1	218754	218799	34.7941	6.76608	-	NC_005835.1	217461	218835	TT_RS01165	-
NC_005835.1	556511	556596	29.5893	6.76601	+	NC_005835.1	555834	556868	TT_RS11370	+
NC_005835.1	1254108	1254151	86.8239	6.76461	-	NC_005835.1	1253544	1254174	TT_RS06565	-
NC_005835.1	1564700	1564773	36.9791	6.76234	+	NC_005835.1	1564400	1565168	TT_RS08335	+
NC_005835.1	1413265	1413305	35.1833	6.76234	+	NC_005835.1	1412981	1414388	TT_RS07520	+
NC_005835.1	1194338	1194398	19.4985	6.76143	-	NC_005835.1	1193900	1194665	TT_RS06220	-
NC_005835.1	1271096	1271141	19.4276	6.76143	-	NC_005835.1	1270799	1271207	TT_RS06725	-
NC_005835.1	285953	286073	38.9034	6.75951	+	NC_005835.1	285888	286575	TT_RS01520	+
NC_005835.1	561207	561249	19.5346	6.75944	-	NC_005835.1	561058	562092	TT_RS11375	-
NC_005835.1	296698	296728	24.0033	6.75611	-	NC_005835.1	296268	296991	TT_RS01570	-
NC_005835.1	590403	590476	35.4686	6.7495	-	NC_005835.1	589976	590504	TT_RS03080	-
NC_005835.1	299706	299747	51.282	6.74911	-	NC_005835.1	299027	299789	TT_RS01590	-
NC_005835.1	1286264	1286320	43.9877	6.74858	+	NC_005835.1	1286127	1288344	TT_RS06835	+
NC_005835.1	1637022	1637087	23.6727	6.74399	-	NC_005835.1	1636618	1637404	TT_RS08730	-
NC_005835.1	1475844	1475891	21.1947	6.7399	-	NC_005835.1	1474922	1476137	TT_RS07840	-
NC_005835.1	898544	898646	20.456	6.7399	+	NC_005835.1	898050	899940	TT_RS04650	+
NC_005835.1	972277	972346	19.2065	6.73853	+	NC_005835.1	971722	974140	TT_RS05000	+
NC_005835.1	893702	893789	47.4847	6.73805	-	NC_005835.1	892485	894444	TT_RS04615	-
NC_005835.1	994846	994873	35.6396	6.73787	+	NC_005835.1	994085	994964	TT_RS05140	+
NC_005835.1	492591	492627	19.485	6.73579	-	NC_005835.1	492348	492939	TT_RS02575	-
NC_005835.1	1170172	1170246	32.8687	6.73558	-	NC_005835.1	1169590	1170628	TT_RS06090	-
NC_005835.1	992190	992332	39.3284	6.73431	+	NC_005835.1	991768	992902	TT_RS05125	+
NC_005838.1	98394	98478	23.3422	6.73166	+	NC_005838.1	98387	99782	TT_RS10670	+
NC_005835.1	17020	17055	19.2793	6.73165	+	NC_005835.1	16862	17084	TT_RS00090	+
NC_005835.1	1118663	1118720	19.2793	6.73165	+	NC_005835.1	1118537	1119221	TT_RS05825	+
NC_005835.1	1192689	1192745	19.2793	6.73165	-	NC_005835.1	1191942	1193901	TT_RS06215	-
NC_005835.1	1045829	1045873	19.7204	6.72888	+	NC_005835.1	1043080	1045939	TT_RS05430	+
NC_005835.1	1464473	1464520	28.6462	6.72855	-	NC_005835.1	1464036	1465599	TT_RS07770	-
NC_005835.1	1764780	1764910	36.5582	6.72851	-	NC_005835.1	1764534	1764999	TT_RS09460	-
NC_005835.1	1604636	1604720	70.0738	6.72722	-	NC_005835.1	1604233	1605142	TT_RS08570	-
NC_005835.1	1048492	1048527	20.4955	6.72541	+	NC_005835.1	1048355	1048655	TT_RS05445	+
NC_005835.1	344920	344987	19.7153	6.72541	-	NC_005835.1	344678	345572	TT_RS01820	-
NC_005835.1	894200	894229	20.865	6.72471	-	NC_005835.1	892485	894444	TT_RS04615	-
NC_005835.1	1446171	1446216	20.1267	6.72331	-	NC_005835.1	1445753	1446323	TT_RS07685	-
NC_005835.1	1818127	1818312	25.8382	6.72265	-	NC_005835.1	1817756	1819577	TT_RS09720	-
NC_005835.1	1413360	1413395	30.1011	6.72158	+	NC_005835.1	1412981	1414388	TT_RS07520	+
NC_005835.1	232075	232162	26.7538	6.72122	-	NC_005835.1	231976	232840	TT_RS01240	-
NC_005838.1	7353	7466	65.2027	6.72122	+	NC_005838.1	7100	7757	TT_RS10180	+
NC_005835.1	1519786	1519824	21.2354	6.72122	-	NC_005835.1	1519681	1520431	TT_RS08115	-
NC_005835.1	1338853	1338914	19.3537	6.71911	-	NC_005835.1	1338060	1339332	TT_RS07125	-
NC_005835.1	886993	887038	44.1353	6.7178	-	NC_005835.1	886375	887047	TT_RS04580	-
NC_005835.1	1654840	1654858	18.8429	6.7177	+	NC_005835.1	1654614	1654881	TT_RS08865	+
NC_005835.1	279712	279786	28.6547	6.71763	-	NC_005835.1	279440	280474	TT_RS11330	-
NC_005835.1	839682	839803	29.1352	6.71699	-	NC_005835.1	839164	839821	TT_RS04365	-
NC_005835.1	1681629	1681667	18.8077	6.71699	+	NC_005835.1	1681613	1682729	TT_RS09030	+
NC_005835.1	165413	165453	41.9574	6.71592	+	NC_005835.1	165396	165594	TT_RS00935	+
NC_005835.1	708281	708365	29.4085	6.71489	+	NC_005835.1	707820	709056	TT_RS03675	+
NC_005835.1	1347008	1347023	18.9146	6.71487	-	NC_005835.1	1345789	1347040	TT_RS07175	-
NC_005835.1	1347457	1347485	55.1998	6.71334	-	NC_005835.1	1347310	1347616	TT_RS07185	-
NC_005835.1	149439	149476	18.9511	6.71133	-	NC_005835.1	149071	150055	TT_RS00855	-
NC_005835.1	90442	90472	19.3916	6.71062	+	NC_005835.1	90229	91252	TT_RS00505	+
NC_005835.1	1815134	1815195	19.3916	6.71062	-	NC_005835.1	1815073	1816357	TT_RS09710	-
NC_005835.1	64078	64159	19.3916	6.71062	-	NC_005835.1	63818	65321	TT_RS11290	-
NC_005835.1	1827439	1827476	20.9056	6.70634	-	NC_005835.1	1826260	1827490	TT_RS09760	-
NC_005835.1	1266415	1266451	19.7975	6.70634	-	NC_005835.1	1266022	1266643	TT_RS06700	-
NC_005835.1	904971	905019	18.9879	6.70634	-	NC_005835.1	902447	905348	TT_RS04665	-
NC_005835.1	962213	962256	18.9879	6.70634	-	NC_005835.1	961811	962945	TT_RS04940	-
NC_005835.1	1606129	1606167	39.2213	6.70063	-	NC_005835.1	1605359	1606430	TT_RS08580	-
NC_005835.1	561331	561419	28.1223	6.6999	-	NC_005835.1	561058	562092	TT_RS11375	-
NC_005835.1	281051	281093	19.0252	6.69987	-	NC_005835.1	280583	281957	TT_RS01485	-
NC_005835.1	1290170	1290268	23.5596	6.6982	+	NC_005835.1	1288363	1290547	TT_RS06840	+
NC_005838.1	8021	8063	32.5903	6.69772	+	NC_005838.1	7757	8969	TT_RS10185	+
NC_005835.1	1254846	1254881	78.8215	6.69742	-	NC_005835.1	1254612	1254993	TT_RS06575	-
NC_005835.1	1525857	1525934	18.5154	6.6948	+	NC_005835.1	1525821	1527090	TT_RS08140	+
NC_005835.1	1456140	1456210	95.8545	6.69383	-	NC_005835.1	1454320	1457167	TT_RS07725	-
NC_005835.1	809065	809132	41.1666	6.69338	+	NC_005835.1	808784	809573	TT_RS04185	+
NC_005835.1	1168206	1168239	18.5868	6.69334	-	NC_005835.1	1166785	1169536	TT_RS06085	-
NC_005835.1	1539377	1539438	19.8368	6.69261	-	NC_005835.1	1539339	1540749	TT_RS08205	-
NC_005835.1	188616	188734	28.763	6.69238	+	NC_005835.1	188599	189658	TT_RS01025	+
NC_005835.1	957522	957591	21.6482	6.69189	-	NC_005835.1	957042	958215	TT_RS04925	-
NC_005835.1	1159014	1159045	21.6482	6.69189	-	NC_005835.1	1158713	1159904	TT_RS06040	-
NC_005835.1	1709560	1709649	19.0629	6.69188	+	NC_005835.1	1709501	1710764	TT_RS09165	+
NC_005835.1	682989	683061	18.4457	6.69042	-	NC_005835.1	682700	683285	TT_RS03550	-
NC_005835.1	1489807	1489847	18.4457	6.69042	-	NC_005835.1	1489376	1490108	TT_RS07940	-
NC_005835.1	492816	492886	35.1717	6.68984	-	NC_005835.1	492348	492939	TT_RS02575	-
NC_005835.1	1165685	1165762	33.2936	6.68898	-	NC_005835.1	1165327	1165951	TT_RS06075	-
NC_005835.1	1086504	1086542	18.7653	6.68804	-	NC_005835.1	1086150	1086573	TT_RS05645	-
NC_005835.1	1401818	1402003	34.8682	6.68707	-	NC_005835.1	1401660	1404309	TT_RS07480	-
NC_005835.1	1788472	1788582	26.1244	6.68603	-	NC_005835.1	1787737	1789366	TT_RS09575	-
NC_005835.1	1462919	1462973	20.9466	6.68602	-	NC_005835.1	1462326	1463172	TT_RS07760	-
NC_005835.1	854311	854344	18.6597	6.68602	-	NC_005835.1	854040	854346	TT_RS04455	-
NC_005835.1	587631	587733	43.6216	6.68591	-	NC_005835.1	586767	588774	TT_RS03065	-
NC_005835.1	1367612	1367653	27.6993	6.68308	+	NC_005835.1	1366478	1367783	TT_RS07305	+
NC_005835.1	261872	262089	34.7073	6.68282	-	NC_005835.1	261253	262882	TT_RS01410	-
NC_005835.1	1062200	1062253	19.101	6.68233	+	NC_005835.1	1062037	1063183	TT_RS05525	+
NC_005835.1	1071401	1071467	19.101	6.68233	-	NC_005835.1	1070448	1071487	TT_RS05570	-
NC_005835.1	149350	149409	35.1156	6.68013	-	NC_005835.1	149071	150055	TT_RS00855	-
NC_005835.1	1874535	1874597	18.6968	6.6801	-	NC_005835.1	1873670	1874621	TT_RS10020	-
NC_005835.1	536871	536949	18.3777	6.6801	+	NC_005835.1	536794	537193	TT_RS02795	+
NC_005835.1	1630182	1630188	52.3707	6.67867	+	NC_005835.1	1630034	1631666	TT_RS08700	+
NC_005835.1	920503	920630	43.7577	6.67686	-	NC_005835.1	919761	920631	TT_RS04750	-
NC_005835.1	1448856	1448930	19.5076	6.67564	+	NC_005835.1	1448466	1449345	TT_RS07700	+
NC_005835.1	1496903	1496963	19.5076	6.67564	-	NC_005835.1	1496016	1497081	TT_RS07975	-
NC_005835.1	46450	46505	44.3693	6.67431	-	NC_005835.1	46401	46584	TT_RS00245	-
NC_005835.1	1252274	1252334	46.4049	6.67394	-	NC_005835.1	1252217	1252574	TT_RS06555	-
NC_005835.1	153856	154035	39.7363	6.67342	-	NC_005835.1	153180	154191	TT_RS00875	-
NC_005835.1	150163	150214	18.7343	6.67264	-	NC_005835.1	150069	150936	TT_RS00860	-
NC_005835.1	1120547	1120619	17.8856	6.67217	+	NC_005835.1	1119930	1122108	TT_RS05835	+
NC_005835.1	993402	993453	18.259	6.67114	+	NC_005835.1	992894	993518	TT_RS05130	+
NC_005835.1	863120	863272	23.454	6.66542	-	NC_005835.1	863090	866084	TT_RS04490	-
NC_005835.1	1461753	1461841	33.7488	6.66336	-	NC_005835.1	1461666	1462317	TT_RS07755	-
NC_005835.1	467732	467829	50.6742	6.662	+	NC_005835.1	467126	469583	TT_RS02430	+
NC_005835.1	1344583	1344669	33.1633	6.66032	-	NC_005835.1	1343611	1344709	TT_RS07160	-
NC_005835.1	122138	122183	18.5647	6.65889	-	NC_005835.1	121902	123012	TT_RS00705	-
NC_005835.1	1684966	1685055	19.1786	6.65826	-	NC_005835.1	1683879	1685232	TT_RS09045	-
NC_005835.1	1454916	1454966	83.9823	6.65293	-	NC_005835.1	1454320	1457167	TT_RS07725	-
NC_005835.1	1314405	1314441	33.7818	6.65291	-	NC_005835.1	1314283	1314661	TT_RS07000	-
NC_005835.1	1377983	1378022	31.1986	6.6529	-	NC_005835.1	1377887	1382462	TT_RS07380	-
NC_005835.1	1413167	1413211	31.6064	6.64956	+	NC_005835.1	1412981	1414388	TT_RS07520	+
NC_005835.1	839839	839928	21.8802	6.64933	-	NC_005835.1	839817	840831	TT_RS04370	-
NC_005835.1	284797	284858	25.1582	6.64903	+	NC_005835.1	284516	285119	TT_RS01510	+
NC_005835.1	359128	359191	20.6584	6.64902	+	NC_005835.1	358285	359431	TT_RS01890	+
NC_005835.1	799408	799451	18.6096	6.64823	-	NC_005835.1	798656	799445	TT_RS04125	-
NC_005835.1	799408	799451	18.6096	6.64823	-	NC_005835.1	799407	799893	TT_RS04130	-
NC_005835.1	953803	953989	20.0763	6.64771	+	NC_005835.1	952490	954068	TT_RS04905	+
NC_005835.1	15670	15746	17.9674	6.64669	+	NC_005835.1	15447	16818	TT_RS00085	+
NC_005835.1	1340435	1340526	17.861	6.64669	-	NC_005835.1	1339937	1340855	TT_RS07135	-
NC_005835.1	801021	801112	18.4438	6.64435	-	NC_005835.1	799954	801502	TT_RS04135	-
NC_005835.1	1387475	1387513	25.0858	6.64358	-	NC_005835.1	1387116	1388154	TT_RS07400	-
NC_005835.1	1074935	1075027	19.2181	6.64357	+	NC_005835.1	1071778	1076257	TT_RS05580	+
NC_005835.1	967180	967217	85.0825	6.64341	+	NC_005835.1	967095	967389	TT_RS04970	+
NC_005835.1	1224708	1224858	44.5363	6.64203	-	NC_005835.1	1223976	1225845	TT_RS06415	-
NC_005835.1	1267448	1267507	150.367	6.64144	-	NC_005835.1	1266965	1268186	TT_RS06710	-
NC_005835.1	1663349	1663395	18.8496	6.64044	-	NC_005835.1	1662837	1664232	TT_RS08920	-
NC_005835.1	178499	178577	28.5344	6.63889	+	NC_005835.1	177672	179184	TT_RS01005	+
NC_005835.1	407449	407480	21.7337	6.63888	-	NC_005835.1	405922	408310	TT_RS02120	-
NC_005835.1	1192379	1192525	19.527	6.63543	-	NC_005835.1	1191942	1193901	TT_RS06215	-
NC_005835.1	165860	165945	64.8821	6.63437	+	NC_005835.1	165605	165962	TT_RS00940	+
NC_005835.1	1061541	1061583	25.2709	6.63415	+	NC_005835.1	1061506	1061950	TT_RS05520	+
NC_005835.1	132737	132825	19.3003	6.63414	+	NC_005835.1	132536	133853	TT_RS00765	+
NC_005835.1	1681462	1681495	35.0709	6.63259	+	NC_005835.1	1681160	1681592	TT_RS09025	+
NC_005835.1	1466235	1466284	18.0777	6.63256	-	NC_005835.1	1465603	1466413	TT_RS07775	-
NC_005835.1	988037	988068	163.838	6.63065	+	NC_005835.1	988000	988076	TT_RS05105	+
NC_005835.1	799299	799391	26.9985	6.63001	-	NC_005835.1	798656	799445	TT_RS04125	-
NC_005835.1	590590	590692	30.8583	6.62978	-	NC_005835.1	590513	591485	TT_RS03085	-
NC_005835.1	300661	300701	56.0383	6.62625	-	NC_005835.1	299799	301557	TT_RS01595	-
NC_005835.1	21681	21758	17.7253	6.62459	+	NC_005835.1	21533	21926	TT_RS00115	+
NC_005835.1	1315765	1315799	17.7253	6.62459	-	NC_005835.1	1315177	1316191	TT_RS07010	-
NC_005835.1	1629732	1629813	92.0114	6.62415	+	NC_005835.1	1629716	1630022	TT_RS08695	+
NC_005835.1	120660	120713	17.6399	6.62378	-	NC_005835.1	119660	120803	TT_RS00695	-
NC_005835.1	1476897	1476958	17.569	6.62378	-	NC_005835.1	1476144	1477122	TT_RS07845	-
NC_005835.1	1802905	1802959	17.569	6.62378	+	NC_005835.1	1802866	1804420	TT_RS09640	+
NC_005838.1	93199	93232	17.569	6.62378	+	NC_005838.1	92781	95199	TT_RS10645	+
NC_005838.1	12129	12178	28.5715	6.6222	+	NC_005838.1	11237	12317	TT_RS10205	+
NC_005835.1	1039525	1039597	17.676	6.62137	-	NC_005835.1	1039267	1039975	TT_RS05405	-
NC_005835.1	847215	847369	28.2256	6.61898	+	NC_005835.1	846030	847698	TT_RS04410	+
NC_005835.1	1460610	1460660	19.9989	6.61896	-	NC_005835.1	1460264	1461242	TT_RS07745	-
NC_005835.1	408388	408447	50.4471	6.61861	-	NC_005835.1	408368	409118	TT_RS02125	-
NC_005835.1	1576565	1576692	39.888	6.6186	+	NC_005835.1	1575876	1576794	TT_RS08425	+
NC_005835.1	1455537	1455566	60.1398	6.61498	-	NC_005835.1	1454320	1457167	TT_RS07725	-
NC_005835.1	891721	891763	31.763	6.61384	-	NC_005835.1	891545	892112	TT_RS04605	-
NC_005838.1	107755	107914	31.4101	6.61299	+	NC_005838.1	106246	108001	TT_RS10705	+
NC_005835.1	1677418	1677537	37.785	6.61262	+	NC_005835.1	1677316	1678426	TT_RS09005	+
NC_005835.1	1615249	1615381	41.21	6.61252	+	NC_005835.1	1614584	1615952	TT_RS08630	+
NC_005838.1	8645	8685	25.4418	6.61166	+	NC_005838.1	7757	8969	TT_RS10185	+
NC_005835.1	1097996	1098068	21.0734	6.61165	+	NC_005835.1	1096219	1098094	TT_RS05700	+
NC_005835.1	1697871	1697934	24.9518	6.61003	+	NC_005835.1	1697046	1698126	TT_RS09105	+
NC_005835.1	1383347	1383383	20.3707	6.61002	-	NC_005835.1	1382491	1385851	TT_RS07385	-
NC_005835.1	1261083	1261201	21.7774	6.60838	-	NC_005835.1	1260688	1261237	TT_RS06640	-
NC_005835.1	374293	374381	24.57	6.60634	-	NC_005835.1	374161	376087	TT_RS01960	-
NC_005835.1	1532161	1532218	21.4157	6.60552	-	NC_005835.1	1531941	1532586	TT_RS08165	-
NC_005835.1	1455299	1455318	42.6929	6.60403	-	NC_005835.1	1454320	1457167	TT_RS07725	-
NC_005835.1	1456073	1456111	75.3886	6.60393	-	NC_005835.1	1454320	1457167	TT_RS07725	-
NC_005835.1	1604344	1604435	39.0922	6.60122	-	NC_005835.1	1604233	1605142	TT_RS08570	-
NC_005835.1	1824699	1824786	22.1468	6.60047	-	NC_005835.1	1824391	1825708	TT_RS09750	-
NC_005835.1	698989	699037	17.3126	6.60013	+	NC_005835.1	698957	700274	TT_RS03630	+
NC_005835.1	1223780	1223814	17.3126	6.60013	-	NC_005835.1	1222891	1223902	TT_RS06410	-
NC_005835.1	49961	50093	18.5714	6.59956	-	NC_005835.1	49667	50372	TT_RS00265	-
NC_005835.1	905407	905453	20.7433	6.59764	-	NC_005835.1	905328	906447	TT_RS04670	-
NC_005835.1	1497834	1497854	52.1949	6.59741	+	NC_005835.1	1497146	1497941	TT_RS07980	+
NC_005835.1	1438859	1439000	39.1371	6.59695	-	NC_005835.1	1438772	1440752	TT_RS07650	-
NC_005835.1	801923	802045	22.0246	6.5962	-	NC_005835.1	801488	802223	TT_RS04140	-
NC_005838.1	9074	9131	33.7787	6.59558	+	NC_005838.1	8965	9637	TT_RS10190	+
NC_005835.1	296411	296453	31.8275	6.59516	-	NC_005835.1	296268	296991	TT_RS01570	-
NC_005835.1	386507	386548	25.4117	6.59515	-	NC_005835.1	386258	386918	TT_RS02020	-
NC_005835.1	1158111	1158170	17.8251	6.59514	-	NC_005835.1	1157596	1158208	TT_RS06030	-
NC_005835.1	1684489	1684570	17.3849	6.59514	-	NC_005835.1	1683879	1685232	TT_RS09045	-
NC_005835.1	252009	252067	18.9694	6.59179	+	NC_005835.1	250324	252901	TT_RS01330	+
NC_005838.1	13523	13603	29.5976	6.58603	+	NC_005838.1	13417	13780	TT_RS10215	+
NC_005838.1	171149	171220	17.8636	6.5842	+	NC_005838.1	170931	171420	TT_RS10970	+
NC_005835.1	1753621	1753710	20.4982	6.58407	+	NC_005835.1	1753403	1753742	TT_RS09390	+
NC_005835.1	1412498	1412527	26.8959	6.5838	+	NC_005835.1	1412232	1412985	TT_RS07515	+
NC_005835.1	1679329	1679380	27.9529	6.58337	+	NC_005835.1	1678762	1680331	TT_RS09015	+
NC_005835.1	974160	974222	21.117	6.58166	+	NC_005835.1	974139	974451	TT_RS05005	+
NC_005835.1	447014	447084	17.4969	6.57482	+	NC_005835.1	445909	447163	TT_RS02330	+
NC_005835.1	1194063	1194104	16.9503	6.57482	-	NC_005835.1	1193900	1194665	TT_RS06220	-
NC_005835.1	1441328	1441401	26.7496	6.57225	-	NC_005835.1	1440779	1441445	TT_RS07655	-
NC_005835.1	1171882	1171947	16.9155	6.57224	-	NC_005835.1	1171516	1172408	TT_RS06110	-
NC_005835.1	1094417	1094457	19.0104	6.57138	-	NC_005835.1	1094237	1096085	TT_RS05695	-
NC_005835.1	1812931	1812971	19.0104	6.57138	-	NC_005835.1	1812231	1813278	TT_RS09700	-
NC_005835.1	437543	437580	17.3352	6.57137	-	NC_005835.1	437236	438010	TT_RS02275	-
NC_005835.1	345333	345382	17.094	6.56791	-	NC_005835.1	344678	345572	TT_RS01820	-
NC_005835.1	338746	338779	19.3816	6.56444	+	NC_005835.1	338360	339254	TT_RS01790	+
NC_005835.1	1636976	1637016	19.3816	6.56444	-	NC_005835.1	1636618	1637404	TT_RS08730	-
NC_005835.1	722140	722187	17.5352	6.56444	-	NC_005835.1	721655	722517	TT_RS03740	-
NC_005835.1	1305298	1305346	17.0742	6.56444	+	NC_005835.1	1305273	1305984	TT_RS06945	+
NC_005835.1	1555391	1555475	25.8782	6.56271	+	NC_005835.1	1554830	1555637	TT_RS08275	+
NC_005835.1	1308703	1308790	29.3807	6.56184	-	NC_005835.1	1308601	1309153	TT_RS06965	-
NC_005835.1	1456460	1456475	43.7491	6.56143	-	NC_005835.1	1454320	1457167	TT_RS07725	-
NC_005835.1	285192	285264	20.3536	6.55926	+	NC_005835.1	285122	285887	TT_RS01515	+
NC_005835.1	1657990	1658031	17.9421	6.55656	+	NC_005835.1	1657676	1658330	TT_RS08885	+
NC_005835.1	1632536	1632674	16.6941	6.55036	-	NC_005835.1	1631729	1633262	TT_RS08705	-
NC_005835.1	144324	144442	26.9805	6.54916	-	NC_005835.1	143878	144706	TT_RS00830	-
NC_005835.1	976635	976687	25.9141	6.5486	+	NC_005835.1	976463	976829	TT_RS05030	+
NC_005835.1	197731	197798	16.7301	6.54858	-	NC_005835.1	197538	198669	TT_RS01070	-
NC_005835.1	405393	405421	16.7301	6.54858	-	NC_005835.1	404916	405918	TT_RS02115	-
NC_005835.1	961870	962010	23.5844	6.54785	-	NC_005835.1	961811	962945	TT_RS04940	-
NC_005838.1	97306	97378	24.074	6.54726	+	NC_005838.1	97183	98377	TT_RS10665	+
NC_005838.1	91343	91424	29.9489	6.54667	-	NC_005838.1	91070	92104	TT_RS11505	-
NC_005835.1	996139	996249	70.4227	6.54622	+	NC_005835.1	994960	997234	TT_RS05145	+
NC_005835.1	1454380	1454425	126.674	6.54517	-	NC_005835.1	1454320	1457167	TT_RS07725	-
NC_005835.1	1121318	1121370	16.5892	6.54501	+	NC_005835.1	1119930	1122108	TT_RS05835	+
NC_005835.1	150963	150993	17.2069	6.54412	-	NC_005835.1	150932	152108	TT_RS00865	-
NC_005835.1	1245717	1245819	18.684	6.54393	-	NC_005835.1	1245375	1245999	TT_RS06510	-
NC_005835.1	1861818	1861910	16.8227	6.54159	-	NC_005835.1	1861230	1862085	TT_RS09950	-
NC_005835.1	917295	917355	25.8507	6.54104	-	NC_005835.1	916654	917703	TT_RS04735	-
NC_005835.1	1275575	1275663	38.4651	6.53989	-	NC_005835.1	1275337	1276120	TT_RS06760	-
NC_005835.1	1522893	1522949	25.2244	6.53783	-	NC_005835.1	1521173	1522967	TT_RS08125	-
NC_005835.1	1721176	1721231	23.1318	6.53783	-	NC_005835.1	1720850	1721903	TT_RS09215	-
NC_005835.1	264725	264776	17.6134	6.53782	-	NC_005835.1	264003	265245	TT_RS01420	-
NC_005835.1	1654035	1654073	39.8981	6.53332	+	NC_005835.1	1653826	1654618	TT_RS08860	+
NC_005835.1	890400	890468	29.8775	6.5324	-	NC_005835.1	890253	890568	TT_RS04595	-
NC_005835.1	1726989	1727025	28.3409	6.53239	-	NC_005835.1	1726570	1727140	TT_RS09250	-
NC_005835.1	1481625	1481690	18.7227	6.53238	-	NC_005835.1	1481034	1481754	TT_RS07880	-
NC_005835.1	380759	380817	17.2456	6.53237	+	NC_005835.1	379992	380847	TT_RS01980	+
NC_005835.1	1194511	1194549	17.2456	6.53237	-	NC_005835.1	1193900	1194665	TT_RS06220	-
NC_005835.1	1058128	1058192	16.8409	6.53237	-	NC_005835.1	1058026	1058725	TT_RS05500	-
NC_005835.1	1724813	1724911	16.8409	6.53237	+	NC_005835.1	1724533	1725361	TT_RS09235	+
NC_005835.1	761244	761371	23.9339	6.52755	-	NC_005835.1	759600	762492	TT_RS03945	-
NC_005835.1	891426	891461	23.8795	6.52506	-	NC_005835.1	890570	891542	TT_RS04600	-
NC_005835.1	540507	540578	23.2663	6.52506	+	NC_005835.1	538448	540683	TT_RS02805	+
NC_005835.1	1550084	1550209	16.3673	6.52505	-	NC_005835.1	1550019	1551594	TT_RS08255	-
NC_005835.1	1257236	1257323	52.4099	6.52326	-	NC_005835.1	1256685	1258002	TT_RS06600	-
NC_005835.1	1840020	1840090	27.3728	6.52322	-	NC_005835.1	1834736	1840145	TT_RS09825	-
NC_005835.1	1879497	1879597	23.3904	6.52322	-	NC_005835.1	1878911	1880999	TT_RS10050	-
NC_005835.1	446535	446605	17.3677	6.52198	+	NC_005835.1	445909	447163	TT_RS02330	+
NC_005835.1	1159955	1160001	22.8782	6.52137	-	NC_005835.1	1159910	1160210	TT_RS06045	-
NC_005835.1	1530251	1530312	17.6534	6.52136	-	NC_005835.1	1530085	1531933	TT_RS08160	-
NC_005835.1	78997	79069	16.9797	6.52136	+	NC_005835.1	78118	79402	TT_RS00435	+
NC_005835.1	814211	814377	103.225	6.52066	-	NC_005835.1	813776	814451	TT_RS04220	-
NC_005835.1	222668	222725	18.0229	6.52044	-	NC_005835.1	222571	223333	TT_RS01190	-
NC_005835.1	958105	958155	17.2849	6.51858	-	NC_005835.1	957042	958215	TT_RS04925	-
NC_005835.1	182065	182135	22.7782	6.5153	+	NC_005835.1	179497	187516	TT_RS01015	+
NC_005835.1	1229910	1230084	24.1745	6.51283	+	NC_005835.1	1229847	1231740	TT_RS06445	+
NC_005835.1	1128609	1128659	24.9333	6.5116	+	NC_005835.1	1127601	1129188	TT_RS05865	+
NC_005835.1	1579190	1579312	25.3734	6.51027	+	NC_005835.1	1578839	1579544	TT_RS08440	+
NC_005835.1	1061654	1061684	16.2295	6.51017	+	NC_005835.1	1061506	1061950	TT_RS05520	+
NC_005835.1	309766	309868	28.6379	6.51001	-	NC_005835.1	308991	310161	TT_RS01645	-
NC_005835.1	1267427	1267443	55.3548	6.50529	-	NC_005835.1	1266965	1268186	TT_RS06710	-
NC_005835.1	484954	485124	44.2272	6.50417	+	NC_005835.1	484819	486016	TT_RS02530	+
NC_005835.1	408055	408102	29.1314	6.50264	-	NC_005835.1	405922	408310	TT_RS02120	-
NC_005835.1	1519255	1519304	17.6939	6.50262	-	NC_005835.1	1518888	1519698	TT_RS08110	-
NC_005835.1	914578	914635	17.3247	6.50262	-	NC_005835.1	914163	914640	TT_RS04720	-
NC_005835.1	1697064	1697100	16.551	6.50167	+	NC_005835.1	1697046	1698126	TT_RS09105	+
NC_005835.1	1663592	1663633	22.6772	6.49883	-	NC_005835.1	1662837	1664232	TT_RS08920	-
NC_005835.1	795923	795962	16.9565	6.49882	-	NC_005835.1	794868	796173	TT_RS04105	-
NC_005835.1	1131672	1131716	16.0761	6.49881	-	NC_005835.1	1131480	1131969	TT_RS05885	-
NC_005835.1	1064555	1064640	16.0407	6.49881	+	NC_005835.1	1064097	1065054	TT_RS05535	+
NC_005835.1	1839243	1839349	44.615	6.4971	-	NC_005835.1	1834736	1840145	TT_RS09825	-
NC_005835.1	33657	33695	33.8009	6.49693	+	NC_005835.1	32843	34217	TT_RS00175	+
NC_005835.1	864558	864611	16.1121	6.4969	-	NC_005835.1	863090	866084	TT_RS04490	-
NC_005835.1	1062055	1062095	16.1121	6.4969	+	NC_005835.1	1062037	1063183	TT_RS05525	+
NC_005835.1	1437704	1437737	16.1121	6.4969	-	NC_005835.1	1436788	1437976	TT_RS07640	-
NC_005835.1	183348	183404	22.4673	6.49548	+	NC_005835.1	179497	187516	TT_RS01015	+
NC_005835.1	1413788	1413870	37.6125	6.49432	+	NC_005835.1	1412981	1414388	TT_RS07520	+
NC_005838.1	111254	111303	16.1486	6.49307	+	NC_005838.1	111139	111484	TT_RS10725	+
NC_005835.1	1442311	1442352	22.804	6.49115	-	NC_005835.1	1442114	1442495	TT_RS07665	-
NC_005835.1	1724297	1724338	16.5893	6.49114	+	NC_005835.1	1723904	1724546	TT_RS09230	+
NC_005835.1	973417	973543	28.3859	6.48991	+	NC_005835.1	971722	974140	TT_RS05000	+
NC_005835.1	128583	128671	28.9358	6.48988	+	NC_005835.1	128352	129233	TT_RS00745	+
NC_005835.1	1720678	1720718	69.1431	6.48838	-	NC_005835.1	1720513	1720735	TT_RS09210	-
NC_005835.1	808825	808880	30.3654	6.4873	+	NC_005835.1	808784	809573	TT_RS04185	+
NC_005835.1	529175	529256	16.1857	6.48727	-	NC_005835.1	527786	530813	TT_RS02750	-
NC_005835.1	1293028	1293082	16.1857	6.48727	+	NC_005835.1	1291242	1293639	TT_RS06855	+
NC_005835.1	1885134	1885185	15.9375	6.48727	+	NC_005835.1	1884077	1885400	TT_RS10075	+
NC_005835.1	996429	996454	23.9185	6.48534	+	NC_005835.1	994960	997234	TT_RS05145	+
NC_005835.1	1420069	1420199	16.6235	6.4849	+	NC_005835.1	1419651	1421915	TT_RS07555	+
NC_005835.1	154919	154983	27.8415	6.48438	-	NC_005835.1	154187	155459	TT_RS00880	-
NC_005835.1	709180	709262	21.5834	6.48437	+	NC_005835.1	709068	710127	TT_RS03680	+
NC_005835.1	759819	759869	16.9961	6.48339	-	NC_005835.1	759600	762492	TT_RS03945	-
NC_005835.1	1175391	1175417	16.9961	6.48339	-	NC_005835.1	1174203	1175463	TT_RS06125	-
NC_005835.1	1572725	1572770	16.9961	6.48339	+	NC_005835.1	1572619	1573765	TT_RS08405	+
NC_005835.1	185423	185477	40.2539	6.48186	+	NC_005835.1	179497	187516	TT_RS01015	+
NC_005835.1	421330	421381	17.7352	6.48143	-	NC_005835.1	420139	421450	TT_RS02190	-
NC_005835.1	1476164	1476217	16.2233	6.47947	-	NC_005835.1	1476144	1477122	TT_RS07845	-
NC_005835.1	1884621	1884680	15.9042	6.47947	+	NC_005835.1	1884077	1885400	TT_RS10075	+
NC_005835.1	1414451	1414494	16.6282	6.47849	+	NC_005835.1	1414440	1415736	TT_RS07525	+
NC_005835.1	1318409	1318530	25.3696	6.47556	-	NC_005835.1	1318194	1319340	TT_RS07025	-
NC_005835.1	340257	340385	186.262	6.47513	+	NC_005835.1	339637	341689	TT_RS01800	+
NC_005835.1	953591	953652	22.4747	6.47457	+	NC_005835.1	952490	954068	TT_RS04905	+
NC_005835.1	530386	530446	18.1063	6.47456	-	NC_005835.1	527786	530813	TT_RS02750	-
NC_005835.1	216813	216899	41.1834	6.47262	-	NC_005835.1	216032	217478	TT_RS01160	-
NC_005835.1	1379351	1379412	31.2107	6.47261	-	NC_005835.1	1377887	1382462	TT_RS07380	-
NC_005835.1	1559956	1560044	37.6153	6.47212	+	NC_005835.1	1559342	1560587	TT_RS08310	+
NC_005835.1	244649	244842	37.9184	6.47163	+	NC_005835.1	241631	245189	TT_RS01290	+
NC_005835.1	1173577	1173638	24.3157	6.4716	-	NC_005835.1	1172919	1174194	TT_RS06120	-
NC_005835.1	1176793	1176873	24.3157	6.4716	-	NC_005835.1	1175488	1177039	TT_RS06130	-
NC_005835.1	1122747	1122788	15.7144	6.47159	+	NC_005835.1	1122100	1123492	TT_RS05840	+
NC_005835.1	1209264	1209393	25.3844	6.47076	-	NC_005835.1	1209247	1210558	TT_RS06335	-
NC_005835.1	91009	91122	27.0175	6.4706	+	NC_005835.1	90229	91252	TT_RS00505	+
NC_005835.1	1497773	1497798	48.1573	6.46966	+	NC_005835.1	1497146	1497941	TT_RS07980	+
NC_005835.1	149194	149242	16.2614	6.46961	-	NC_005835.1	149071	150055	TT_RS00855	-
NC_005838.1	99039	99149	15.8714	6.46961	+	NC_005838.1	98387	99782	TT_RS10670	+
NC_005835.1	1306696	1306830	34.5943	6.46865	-	NC_005835.1	1306630	1307599	TT_RS06955	-
NC_005835.1	1347117	1347153	65.4889	6.46856	-	NC_005835.1	1347049	1347307	TT_RS07180	-
NC_005835.1	1390761	1390804	41.1565	6.46745	-	NC_005835.1	1389890	1390913	TT_RS07410	-
NC_005835.1	1120959	1121116	35.7397	6.46575	+	NC_005835.1	1119930	1122108	TT_RS05835	+
NC_005835.1	1217414	1217463	16.1005	6.46362	+	NC_005835.1	1217285	1218278	TT_RS06385	+
NC_005835.1	1531476	1531530	15.6456	6.46362	-	NC_005835.1	1530085	1531933	TT_RS08160	-
NC_005835.1	1679182	1679312	46.3342	6.46177	+	NC_005835.1	1678762	1680331	TT_RS09015	+
NC_005835.1	1554135	1554249	16.8528	6.45959	+	NC_005835.1	1553697	1554834	TT_RS08270	+
NC_005835.1	383077	383193	19.0618	6.45893	+	NC_005835.1	382963	383701	TT_RS02000	+
NC_005835.1	1760434	1760559	69.7701	6.45808	-	NC_005835.1	1759751	1761029	TT_RS09435	-
NC_005835.1	806743	806806	19.8861	6.45759	+	NC_005835.1	806466	807129	TT_RS04170	+
NC_005835.1	1646000	1646092	19.8861	6.45759	+	NC_005835.1	1645377	1646955	TT_RS08775	+
NC_005835.1	1151295	1151385	15.8392	6.45758	-	NC_005835.1	1150473	1151397	TT_RS05985	-
NC_005835.1	168175	168267	15.8958	6.45657	+	NC_005835.1	168132	168810	TT_RS00955	+
NC_005835.1	1057433	1057459	15.8958	6.45657	+	NC_005835.1	1057418	1057973	TT_RS05495	+
NC_005835.1	1670459	1670702	24.4197	6.45284	-	NC_005835.1	1670430	1671477	TT_RS08965	-
NC_005838.1	10515	10590	29.1348	6.45016	+	NC_005838.1	10381	11245	TT_RS10200	+
NC_005835.1	1344998	1345046	15.9337	6.44741	-	NC_005835.1	1344708	1345254	TT_RS07165	-
NC_005835.1	1220837	1220887	15.5792	6.44741	+	NC_005835.1	1219851	1220904	TT_RS06395	+
NC_005835.1	184583	184628	21.6452	6.44639	+	NC_005835.1	179497	187516	TT_RS01015	+
NC_005835.1	1174433	1174456	16.7079	6.44638	-	NC_005835.1	1174203	1175463	TT_RS06125	-
NC_005835.1	743701	743803	19.5562	6.4433	-	NC_005835.1	742986	743889	TT_RS03860	-
NC_005835.1	1158364	1158414	16.3395	6.4433	-	NC_005835.1	1158209	1158704	TT_RS06035	-
NC_005835.1	280951	281001	15.4947	6.4433	-	NC_005835.1	280583	281957	TT_RS01485	-
NC_005835.1	539359	539414	15.4947	6.4433	+	NC_005835.1	538448	540683	TT_RS02805	+
NC_005835.1	1588038	1588160	16.4365	6.44137	-	NC_005835.1	1586738	1588565	TT_RS08490	-
NC_005835.1	754511	754556	21.7677	6.44021	+	NC_005835.1	752876	755018	TT_RS03925	+
NC_005835.1	1292504	1292573	21.8164	6.44021	+	NC_005835.1	1291242	1293639	TT_RS06855	+
NC_005835.1	800866	800915	17.448	6.4402	-	NC_005835.1	799954	801502	TT_RS04135	-
NC_005835.1	162832	162943	16.5971	6.4402	-	NC_005835.1	162272	163919	TT_RS00920	-
NC_005835.1	1372055	1372105	22.0099	6.43917	+	NC_005835.1	1372042	1372420	TT_RS07340	+
NC_005835.1	91692	91722	15.5313	6.43916	+	NC_005835.1	91248	92232	TT_RS00510	+
NC_005835.1	183741	183774	15.5313	6.43916	+	NC_005835.1	179497	187516	TT_RS01015	+
NC_005835.1	1544135	1544210	15.5313	6.43916	-	NC_005835.1	1541857	1544527	TT_RS08215	-
NC_005835.1	1760668	1760737	35.2758	6.4377	-	NC_005835.1	1759751	1761029	TT_RS09435	-
NC_005835.1	1834812	1834966	32.9818	6.4362	-	NC_005835.1	1834736	1840145	TT_RS09825	-
NC_005835.1	1653116	1653146	15.9723	6.43605	+	NC_005835.1	1652554	1653244	TT_RS08845	+
NC_005835.1	81174	81262	15.5468	6.43605	+	NC_005835.1	81160	81865	TT_RS00455	+
NC_005835.1	1697747	1697797	15.5468	6.43605	+	NC_005835.1	1697046	1698126	TT_RS09105	+
NC_005835.1	1477847	1477921	32.2036	6.43469	+	NC_005835.1	1477586	1478183	TT_RS07865	+
NC_005835.1	297786	297812	24.9584	6.43293	-	NC_005835.1	297724	298393	TT_RS01580	-
NC_005835.1	1193748	1193803	18.5222	6.43292	-	NC_005835.1	1191942	1193901	TT_RS06215	-
NC_005835.1	1650654	1650671	53.003	6.42914	+	NC_005835.1	1649912	1651133	TT_RS08820	+
NC_005835.1	845216	845282	21.0277	6.42897	+	NC_005835.1	844766	845303	TT_RS04400	+
NC_005835.1	1774798	1774846	74.8741	6.42818	+	NC_005835.1	1774544	1775453	TT_RS09530	+
NC_005835.1	1346882	1346923	21.3521	6.42716	-	NC_005835.1	1345789	1347040	TT_RS07175	-
NC_005835.1	683583	683636	26.9623	6.42664	-	NC_005835.1	683285	684419	TT_RS03555	-
NC_005835.1	296020	296103	24.0616	6.42663	-	NC_005835.1	295216	296266	TT_RS01565	-
NC_005835.1	733564	733617	16.7487	6.42662	-	NC_005835.1	733118	734051	TT_RS03795	-
NC_005835.1	1815996	1816030	16.3795	6.42662	-	NC_005835.1	1815073	1816357	TT_RS09710	-
NC_005835.1	590065	590113	41.2709	6.42285	-	NC_005835.1	589976	590504	TT_RS03080	-
NC_005835.1	853789	853870	31.2908	6.42241	-	NC_005835.1	853240	854044	TT_RS04450	-
NC_005835.1	1683259	1683296	21.2643	6.4224	-	NC_005835.1	1683169	1683691	TT_RS09040	-
NC_005835.1	1064737	1064788	17.1191	6.42239	+	NC_005835.1	1064097	1065054	TT_RS05535	+
NC_005835.1	1654579	1654615	46.4115	6.41996	+	NC_005835.1	1653826	1654618	TT_RS08860	+
NC_005835.1	1654579	1654615	46.4115	6.41996	+	NC_005835.1	1654614	1654881	TT_RS08865	+
NC_005835.1	1224006	1224028	21.4753	6.41868	-	NC_005835.1	1223976	1225845	TT_RS06415	-
NC_005835.1	1490792	1490844	21.5301	6.41868	-	NC_005835.1	1490187	1490964	TT_RS07945	-
NC_005835.1	850987	851034	15.1324	6.41813	-	NC_005835.1	850798	851917	TT_RS04435	-
NC_005835.1	1012104	1012158	15.1324	6.41813	-	NC_005835.1	1011752	1012172	TT_RS05240	-
NC_005835.1	255802	255912	29.6114	6.41801	-	NC_005835.1	255001	256252	TT_RS01365	-
NC_005835.1	1367505	1367566	30.2308	6.41709	+	NC_005835.1	1366478	1367783	TT_RS07305	+
NC_005835.1	1487391	1487474	29.5766	6.41709	-	NC_005835.1	1486970	1488233	TT_RS07925	-
NC_005835.1	1387348	1387378	21.9901	6.41708	-	NC_005835.1	1387116	1388154	TT_RS07400	-
NC_005835.1	1319259	1319311	15.1681	6.41706	-	NC_005835.1	1318194	1319340	TT_RS07025	-
NC_005835.1	345506	345556	25.4831	6.41387	-	NC_005835.1	344678	345572	TT_RS01820	-
NC_005835.1	1867876	1867959	15.6446	6.41385	+	NC_005835.1	1866860	1868012	TT_RS09985	+
NC_005838.1	17502	17547	15.6446	6.41385	+	NC_005838.1	16675	17683	TT_RS10245	+
NC_005835.1	679137	679201	15.2044	6.41385	-	NC_005835.1	677891	679244	TT_RS03535	-
NC_005835.1	1654412	1654456	62.4066	6.41277	+	NC_005835.1	1653826	1654618	TT_RS08860	+
NC_005835.1	1413725	1413765	47.2101	6.41205	+	NC_005835.1	1412981	1414388	TT_RS07520	+
NC_005835.1	488404	488517	23.2557	6.41203	-	NC_005835.1	488049	489060	TT_RS02550	-
NC_005835.1	813799	813850	61.1933	6.41131	-	NC_005835.1	813776	814451	TT_RS04220	-
NC_005835.1	1489682	1489758	26.4239	6.40876	-	NC_005835.1	1489376	1490108	TT_RS07940	-
NC_005835.1	120199	120267	15.2414	6.40846	-	NC_005835.1	119660	120803	TT_RS00695	-
NC_005838.1	73169	73197	25.9899	6.40812	+	NC_005838.1	72919	73609	TT_RS10530	+
NC_005835.1	1888071	1888106	21.0592	6.40739	-	NC_005835.1	1887974	1888571	TT_RS10095	-
NC_005835.1	1336507	1336536	16.4202	6.40738	-	NC_005835.1	1335801	1336659	TT_RS07110	-
NC_005835.1	1606055	1606086	31.1811	6.40633	-	NC_005835.1	1605359	1606430	TT_RS08580	-
NC_005835.1	1206602	1206630	16.0513	6.4063	-	NC_005835.1	1206580	1207108	TT_RS06310	-
NC_005835.1	462631	462794	21.2637	6.4024	-	NC_005835.1	460855	463459	TT_RS02400	-
NC_005835.1	999908	1000021	17.0354	6.40234	+	NC_005835.1	999000	1000047	TT_RS05160	+
NC_005835.1	412246	412466	19.2031	6.40183	-	NC_005835.1	410863	412912	TT_RS02140	-
NC_005835.1	1375020	1375100	24.4629	6.40087	-	NC_005835.1	1375004	1376039	TT_RS07360	-
NC_005835.1	64446	64477	17.8633	6.40086	+	NC_005835.1	63182	64526	TT_RS00355	+
NC_005835.1	917651	917688	15.2789	6.40085	-	NC_005835.1	916654	917703	TT_RS04735	-
NC_005835.1	1162677	1162764	16.0502	6.39907	-	NC_005835.1	1162329	1162773	TT_RS06060	-
NC_005835.1	1269600	1269629	25.5284	6.39649	-	NC_005835.1	1268243	1270319	TT_RS06715	-
NC_005835.1	1563149	1563214	21.1831	6.39648	+	NC_005835.1	1562961	1564401	TT_RS08330	+
NC_005835.1	484766	484797	20.9145	6.39648	+	NC_005835.1	484550	484823	TT_RS02525	+
NC_005838.1	12073	12101	17.1615	6.39647	+	NC_005838.1	11237	12317	TT_RS10205	+
NC_005835.1	1308269	1308329	25.66	6.39355	-	NC_005835.1	1307595	1308600	TT_RS06960	-
NC_005835.1	1159640	1159678	25.0588	6.39097	-	NC_005835.1	1158713	1159904	TT_RS06040	-
NC_005835.1	1650955	1650982	79.0117	6.39068	+	NC_005835.1	1649912	1651133	TT_RS08820	+
NC_005835.1	1642695	1642758	14.8063	6.38984	-	NC_005835.1	1642542	1643511	TT_RS08760	-
NC_005835.1	1879684	1879743	14.8063	6.38984	-	NC_005835.1	1878911	1880999	TT_RS10050	-
NC_005835.1	1647614	1647644	14.7715	6.38762	+	NC_005835.1	1647594	1647879	TT_RS08785	+
NC_005835.1	1073082	1073197	18.447	6.38672	+	NC_005835.1	1071778	1076257	TT_RS05580	+
NC_005835.1	406491	406602	29.2303	6.3866	-	NC_005835.1	405922	408310	TT_RS02120	-
NC_005838.1	8745	8781	22.8817	6.38641	+	NC_005838.1	7757	8969	TT_RS10185	+
NC_005835.1	536126	536159	16.4616	6.38539	+	NC_005835.1	535310	536483	TT_RS02785	+
NC_005835.1	539838	539877	15.7232	6.38539	+	NC_005835.1	538448	540683	TT_RS02805	+
NC_005835.1	1837261	1837307	21.6388	6.38316	-	NC_005835.1	1834736	1840145	TT_RS09825	-
NC_005835.1	359347	359413	14.7373	6.38315	+	NC_005835.1	358285	359431	TT_RS01890	+
NC_005835.1	1886452	1886557	20.8278	6.3826	-	NC_005835.1	1885929	1886958	TT_RS10085	-
NC_005835.1	1574379	1574464	57.3068	6.37691	+	NC_005835.1	1573768	1574494	TT_RS08410	+
NC_005835.1	374821	374923	24.0165	6.37641	-	NC_005835.1	374161	376087	TT_RS01960	-
NC_005835.1	94389	94439	14.7036	6.3764	+	NC_005835.1	94242	95208	TT_RS00530	+
NC_005835.1	1446442	1446510	25.6713	6.37415	-	NC_005835.1	1446349	1447135	TT_RS07690	-
NC_005835.1	345199	345250	22.7556	6.37415	-	NC_005835.1	344678	345572	TT_RS01820	-
NC_005835.1	1253232	1253272	36.5965	6.37114	-	NC_005835.1	1252578	1253526	TT_RS06560	-
NC_005835.1	713494	713621	28.9678	6.36961	-	NC_005835.1	712941	713757	TT_RS03705	-
NC_005835.1	996280	996351	57.6924	6.36896	+	NC_005835.1	994960	997234	TT_RS05145	+
NC_005835.1	1630820	1631009	147.375	6.36883	+	NC_005835.1	1630034	1631666	TT_RS08700	+
NC_005835.1	1477307	1477341	167.029	6.36825	-	NC_005835.1	1477265	1477341	TT_RS07850	-
NC_005835.1	3334	3509	39.3447	6.36734	+	NC_005835.1	2665	3985	TT_RS00020	+
NC_005835.1	814136	814146	36.5024	6.36733	-	NC_005835.1	813776	814451	TT_RS04220	-
NC_005835.1	1720996	1721045	20.5082	6.3673	-	NC_005835.1	1720850	1721903	TT_RS09215	-
NC_005835.1	1615853	1615889	20.4186	6.3673	+	NC_005835.1	1614584	1615952	TT_RS08630	+
NC_005835.1	332790	332825	14.9897	6.3673	-	NC_005835.1	332622	332901	TT_RS01760	-
NC_005835.1	503002	503065	14.9897	6.3673	-	NC_005835.1	502168	503278	TT_RS02630	-
NC_005835.1	146976	147067	15.1608	6.3673	-	NC_005835.1	146029	147157	TT_RS00840	-
NC_005835.1	1611063	1611158	25.6293	6.36647	+	NC_005835.1	1610661	1613352	TT_RS08620	+
NC_005835.1	844622	844656	16.133	6.36615	+	NC_005835.1	844236	844770	TT_RS04395	+
NC_005835.1	408235	408284	27.5074	6.36541	-	NC_005835.1	405922	408310	TT_RS02120	-
NC_005835.1	1207572	1207643	20.3376	6.36386	-	NC_005835.1	1207117	1207654	TT_RS06315	-
NC_005835.1	1343374	1343431	22.2194	6.36156	-	NC_005835.1	1343263	1343605	TT_RS07155	-
NC_005835.1	78893	78928	14.5158	6.36155	+	NC_005835.1	78118	79402	TT_RS00435	+
NC_005835.1	356176	356306	14.5158	6.36155	+	NC_005835.1	356067	356865	TT_RS01880	+
NC_005835.1	796337	796404	18.6125	6.3604	-	NC_005835.1	796213	797071	TT_RS04110	-
NC_005835.1	1044492	1044566	16.5038	6.36039	+	NC_005835.1	1043080	1045939	TT_RS05430	+
NC_005835.1	753213	753251	14.4806	6.36039	+	NC_005835.1	752876	755018	TT_RS03925	+
NC_005835.1	1168661	1168846	52.1899	6.35996	-	NC_005835.1	1166785	1169536	TT_RS06085	-
NC_005835.1	1146117	1146207	25.731	6.35964	-	NC_005835.1	1145784	1146225	TT_RS05955	-
NC_005835.1	1283558	1283598	14.4461	6.35692	-	NC_005835.1	1283453	1283843	TT_RS06815	-
NC_005835.1	1293176	1293235	14.4461	6.35692	+	NC_005835.1	1291242	1293639	TT_RS06855	+
NC_005835.1	236780	236812	62.5134	6.35638	+	NC_005835.1	236742	236819	TT_RS01260	+
NC_005835.1	1813785	1813882	33.0934	6.35578	-	NC_005835.1	1813282	1815061	TT_RS09705	-
NC_005835.1	60712	60753	20.5671	6.35576	-	NC_005835.1	60533	60974	TT_RS00340	-
NC_005835.1	1341989	1342061	20.6294	6.35576	-	NC_005835.1	1340972	1342079	TT_RS07140	-
NC_005835.1	976297	976336	14.6383	6.35575	+	NC_005835.1	975806	976454	TT_RS05025	+
NC_005835.1	226244	226364	20.4251	6.35249	-	NC_005835.1	225451	226588	TT_RS01205	-
NC_005835.1	1604485	1604520	20.9891	6.3511	-	NC_005835.1	1604233	1605142	TT_RS08570	-
NC_005835.1	798422	798471	17.5784	6.35109	-	NC_005835.1	797928	798681	TT_RS04120	-
NC_005835.1	1575405	1575437	17.5784	6.35109	+	NC_005835.1	1575301	1575880	TT_RS08420	+
NC_005835.1	1880605	1880689	14.625	6.35108	-	NC_005835.1	1878911	1880999	TT_RS10050	-
NC_005835.1	1333703	1333859	33.9702	6.35007	-	NC_005835.1	1333388	1334798	TT_RS07100	-
NC_005835.1	1159336	1159365	21.7423	6.34699	-	NC_005835.1	1158713	1159904	TT_RS06040	-
NC_005835.1	1564461	1564517	27.8989	6.34641	+	NC_005835.1	1564400	1565168	TT_RS08335	+
NC_005835.1	446822	446895	19.3192	6.34639	+	NC_005835.1	445909	447163	TT_RS02330	+
NC_005835.1	1683432	1683463	15.4355	6.34639	-	NC_005835.1	1683169	1683691	TT_RS09040	-
NC_005835.1	132162	132204	20.1814	6.34462	+	NC_005835.1	132040	132427	TT_RS00760	+
NC_005835.1	1378024	1378062	20.0499	6.34462	-	NC_005835.1	1377887	1382462	TT_RS07380	-
NC_005835.1	740014	740081	41.5067	6.34289	-	NC_005835.1	739721	740177	TT_RS03835	-
NC_005835.1	1131595	1131641	14.6627	6.34284	-	NC_005835.1	1131480	1131969	TT_RS05885	-
NC_005835.1	1091135	1091176	15.0676	6.34166	-	NC_005835.1	1089863	1092428	TT_RS05675	-
NC_005835.1	1008193	1008219	21.0228	6.34107	-	NC_005835.1	1008088	1008409	TT_RS05215	-
NC_005835.1	1336747	1336793	21.0228	6.34107	-	NC_005835.1	1336658	1337030	TT_RS07115	-
NC_005835.1	1681217	1681297	48.1342	6.33851	+	NC_005835.1	1681160	1681592	TT_RS09025	+
NC_005835.1	1653534	1653572	29.8022	6.33814	+	NC_005835.1	1653511	1653817	TT_RS08855	+
NC_005835.1	903410	903444	27.5741	6.33572	-	NC_005835.1	902447	905348	TT_RS04665	-
NC_005835.1	1499833	1499905	24.1432	6.33212	+	NC_005835.1	1499806	1500403	TT_RS08005	+
NC_005835.1	1436821	1436860	21.4167	6.33211	-	NC_005835.1	1436788	1437976	TT_RS07640	-
NC_005835.1	703479	703518	16.5468	6.3321	+	NC_005835.1	703018	704087	TT_RS03650	+
NC_005835.1	1667555	1667619	14.3465	6.3321	-	NC_005835.1	1667031	1668135	TT_RS08940	-
NC_005835.1	1212110	1212181	14.2255	6.3321	+	NC_005835.1	1211575	1212640	TT_RS06345	+
NC_005835.1	1539458	1539603	30.8938	6.33179	-	NC_005835.1	1539339	1540749	TT_RS08205	-
NC_005835.1	641875	641908	14.2616	6.32969	-	NC_005835.1	641867	641940	TT_RS03315	-
NC_005835.1	1107357	1107448	14.2616	6.32969	+	NC_005835.1	1107355	1107973	TT_RS05745	+
NC_005835.1	844995	845059	35.0096	6.3261	+	NC_005835.1	844766	845303	TT_RS04400	+
NC_005835.1	254210	254276	15.4764	6.32607	-	NC_005835.1	253914	254982	TT_RS01360	-
NC_005835.1	708202	708261	28.1467	6.32548	+	NC_005835.1	707820	709056	TT_RS03675	+
NC_005835.1	406155	406193	27.2494	6.32487	-	NC_005835.1	405922	408310	TT_RS02120	-
NC_005835.1	1210435	1210488	25.1159	6.32487	-	NC_005835.1	1209247	1210558	TT_RS06335	-
NC_005835.1	241646	241699	14.5758	6.32485	+	NC_005835.1	241631	245189	TT_RS01290	+
NC_005835.1	1275014	1275080	14.2984	6.32485	-	NC_005835.1	1273978	1275334	TT_RS06755	-
NC_005835.1	1345856	1345921	31.6065	6.32464	-	NC_005835.1	1345789	1347040	TT_RS07175	-
NC_005835.1	991488	991595	17.7947	6.32278	+	NC_005835.1	990629	991634	TT_RS05120	+
NC_005835.1	44615	44685	14.0373	6.32196	-	NC_005835.1	44351	45269	TT_RS00235	-
NC_005835.1	1558818	1558868	19.9202	6.31876	+	NC_005835.1	1557998	1558904	TT_RS08300	+
NC_005835.1	67257	67301	14.7401	6.31875	-	NC_005835.1	67201	67450	TT_RS00370	-
NC_005835.1	963595	963669	35.7204	6.31854	-	NC_005835.1	963017	963833	TT_RS04945	-
NC_005835.1	77861	77949	16.9199	6.31753	+	NC_005835.1	76961	78086	TT_RS00430	+
NC_005835.1	794531	794571	14.3358	6.31753	-	NC_005835.1	793514	794855	TT_RS04100	-
NC_005835.1	587307	587355	27.8739	6.31694	-	NC_005835.1	586767	588774	TT_RS03065	-
NC_005835.1	1386481	1386587	53.2334	6.31488	-	NC_005835.1	1386040	1386682	TT_RS07390	-
NC_005835.1	918482	918512	20.7319	6.31385	-	NC_005835.1	917699	919169	TT_RS04740	-
NC_005835.1	344503	344653	26.6395	6.31172	-	NC_005835.1	343848	344664	TT_RS01815	-
NC_005835.1	1731246	1731272	30.746	6.30923	+	NC_005835.1	1729688	1731299	TT_RS09280	+
NC_005835.1	1400307	1400434	16.4467	6.30601	-	NC_005835.1	1399576	1400560	TT_RS07465	-
NC_005835.1	218527	218567	19.5064	6.30516	-	NC_005835.1	217461	218835	TT_RS01165	-
NC_005835.1	1490043	1490083	19.5361	6.30454	-	NC_005835.1	1489376	1490108	TT_RS07940	-
NC_005835.1	1604950	1604985	24.8237	6.30267	-	NC_005835.1	1604233	1605142	TT_RS08570	-
NC_005835.1	1118424	1118451	15.5182	6.30265	+	NC_005835.1	1118286	1118541	TT_RS05820	+
NC_005835.1	959893	959980	13.9356	6.3014	-	NC_005835.1	958215	960018	TT_RS04930	-
NC_005835.1	1701428	1701488	13.9356	6.3014	-	NC_005835.1	1700338	1701547	TT_RS09120	-
NC_005835.1	1758137	1758187	13.9356	6.3014	-	NC_005835.1	1758105	1759242	TT_RS09425	-
NC_005835.1	1381701	1381754	36.2367	6.30018	-	NC_005835.1	1377887	1382462	TT_RS07380	-
NC_005835.1	619143	619186	20.104	6.30015	+	NC_005835.1	618647	619241	TT_RS03205	+
NC_005835.1	1089798	1089845	20.0161	6.30015	-	NC_005835.1	1089464	1089854	TT_RS05670	-
NC_005835.1	1483616	1483662	16.5908	6.30015	+	NC_005835.1	1483174	1484287	TT_RS07905	+
NC_005835.1	1144500	1144548	24.4296	6.29903	+	NC_005835.1	1144119	1145643	TT_RS11410	+
NC_005835.1	27012	27155	19.1692	6.29853	-	NC_005835.1	26362	27406	TT_RS00140	-
NC_005835.1	1887924	1887960	13.9721	6.29763	-	NC_005835.1	1886950	1887973	TT_RS10090	-
NC_005835.1	1466785	1466874	27.696	6.29512	-	NC_005835.1	1466444	1467479	TT_RS07780	-
NC_005835.1	1500329	1500368	15.8893	6.2951	+	NC_005835.1	1499806	1500403	TT_RS08005	+
NC_005835.1	149116	149137	14.4128	6.2951	-	NC_005835.1	149071	150055	TT_RS00855	-
NC_005835.1	1374911	1374972	14.4128	6.2951	-	NC_005835.1	1373507	1374998	TT_RS07355	-
NC_005835.1	1347758	1347789	241.918	6.29431	-	NC_005835.1	1347713	1347789	TT_RS07190	-
NC_005835.1	1559218	1559270	24.8543	6.29301	+	NC_005835.1	1558946	1559342	TT_RS08305	+
NC_005835.1	1525505	1525613	32.4922	6.29133	+	NC_005835.1	1524641	1525769	TT_RS08135	+
NC_005835.1	728646	728754	20.1492	6.2913	+	NC_005835.1	728646	729747	TT_RS03780	+
NC_005835.1	1130480	1130500	20.0491	6.2913	-	NC_005835.1	1130050	1131007	TT_RS05875	-
NC_005835.1	1046706	1046769	14.0092	6.29129	-	NC_005835.1	1045986	1046976	TT_RS05435	-
NC_005835.1	1888125	1888169	24.1198	6.29089	-	NC_005835.1	1887974	1888571	TT_RS10095	-
NC_005835.1	91140	91243	39.9154	6.29039	+	NC_005835.1	90229	91252	TT_RS00505	+
NC_005835.1	1868763	1868813	20.122	6.28748	+	NC_005835.1	1868549	1868846	TT_RS09995	+
NC_005835.1	1583879	1584014	20.247	6.28499	-	NC_005835.1	1583322	1585698	TT_RS08480	-
NC_005835.1	446024	446085	14.8205	6.28362	+	NC_005835.1	445909	447163	TT_RS02330	+
NC_005835.1	843156	843184	14.8205	6.28362	+	NC_005835.1	842587	843193	TT_RS04385	+
NC_005835.1	1683214	1683247	19.6923	6.28234	-	NC_005835.1	1683169	1683691	TT_RS09040	-
NC_005835.1	1444146	1444217	15.1899	6.28233	-	NC_005835.1	1443829	1444525	TT_RS07675	-
NC_005835.1	1305709	1305783	14.0471	6.28233	+	NC_005835.1	1305273	1305984	TT_RS06945	+
NC_005835.1	1865632	1865729	17.335	6.2821	+	NC_005835.1	1865578	1866871	TT_RS09980	+
NC_005835.1	994527	994643	78.6242	6.28008	+	NC_005835.1	994085	994964	TT_RS05140	+
NC_005835.1	1167843	1167904	19.1274	6.27976	-	NC_005835.1	1166785	1169536	TT_RS06085	-
NC_005835.1	515280	515495	22.636	6.27827	+	NC_005835.1	514875	517812	TT_RS02700	+
NC_005835.1	531729	531782	15.5608	6.27586	-	NC_005835.1	531303	532458	TT_RS02760	-
NC_005835.1	666800	666914	19.725	6.27392	-	NC_005835.1	666060	667056	TT_RS03480	-
NC_005835.1	994757	994808	56.7109	6.27267	+	NC_005835.1	994085	994964	TT_RS05140	+
NC_005835.1	67713	67741	13.5744	6.27195	-	NC_005835.1	67454	67826	TT_RS11295	-
NC_005835.1	1666662	1666706	14.0857	6.27064	-	NC_005835.1	1666047	1667022	TT_RS08935	-
NC_005835.1	544289	544337	13.646	6.26933	+	NC_005835.1	543864	544476	TT_RS02820	+
NC_005835.1	1742120	1742193	13.646	6.26933	+	NC_005835.1	1742096	1743923	TT_RS09330	+
NC_005835.1	1591776	1591830	13.5397	6.26933	-	NC_005835.1	1591274	1592432	TT_RS08505	-
NC_005835.1	83689	83798	13.3133	6.2692	-	NC_005835.1	82790	83800	TT_RS11300	-
NC_005835.1	703990	704073	38.1446	6.26719	+	NC_005835.1	703018	704087	TT_RS03650	+
NC_005835.1	336053	336104	23.4485	6.26716	-	NC_005835.1	336041	336515	TT_RS01780	-
NC_005838.1	9821	9877	75.2129	6.26362	+	NC_005838.1	9633	10377	TT_RS10195	+
NC_005835.1	532309	532376	18.9025	6.26209	-	NC_005835.1	531303	532458	TT_RS02760	-
NC_005835.1	52326	52374	14.8619	6.26142	+	NC_005835.1	52175	52793	TT_RS00280	+
NC_005835.1	1382030	1382046	14.8619	6.26142	-	NC_005835.1	1377887	1382462	TT_RS07380	-
NC_005835.1	561799	561828	14.8619	6.26142	-	NC_005835.1	561058	562092	TT_RS11375	-
NC_005835.1	1552684	1552803	28.7287	6.26027	-	NC_005835.1	1551649	1553476	TT_RS08260	-
NC_005835.1	892319	892370	45.6577	6.25672	-	NC_005835.1	892171	892471	TT_RS04610	-
NC_005835.1	1525289	1525333	15.2324	6.2561	+	NC_005835.1	1524641	1525769	TT_RS08135	+
NC_005835.1	354857	354875	14.1251	6.2561	+	NC_005835.1	354832	356071	TT_RS01875	+
NC_005835.1	1466061	1466091	13.7205	6.2561	-	NC_005835.1	1465603	1466413	TT_RS07775	-
NC_005835.1	1471493	1471563	13.7205	6.2561	-	NC_005835.1	1471089	1472220	TT_RS07820	-
NC_005838.1	17684	17741	13.7205	6.2561	+	NC_005838.1	17679	17901	TT_RS10250	+
NC_005835.1	66709	66783	13.4723	6.2561	-	NC_005835.1	65912	67205	TT_RS00365	-
NC_005835.1	1068217	1068249	45.7197	6.25535	-	NC_005835.1	1067877	1068264	TT_RS05555	-
NC_005835.1	160447	160560	18.4951	6.25365	+	NC_005835.1	159742	160738	TT_RS00900	+
NC_005835.1	958680	958913	19.9719	6.25323	-	NC_005835.1	958215	960018	TT_RS04930	-
NC_005835.1	1504077	1504142	19.792	6.25276	+	NC_005835.1	1502603	1504193	TT_RS08030	+
NC_005835.1	19381	19443	25.0279	6.25075	+	NC_005835.1	18924	19868	TT_RS00105	+
NC_005835.1	405768	405840	35.2179	6.25027	-	NC_005835.1	404916	405918	TT_RS02115	-
NC_005835.1	359931	360004	21.2349	6.25007	-	NC_005835.1	359747	362456	TT_RS01900	-
NC_005835.1	1511714	1511782	20.1815	6.25007	+	NC_005835.1	1510172	1512530	TT_RS08065	+
NC_005835.1	1118331	1118363	16.3068	6.24669	+	NC_005835.1	1118286	1118541	TT_RS05820	+
NC_005835.1	1717974	1718035	13.7588	6.24533	+	NC_005835.1	1712093	1718297	TT_RS09185	+
NC_005835.1	1375973	1376023	13.4398	6.24533	-	NC_005835.1	1375004	1376039	TT_RS07360	-
NC_005835.1	1163488	1163584	23.7724	6.24471	-	NC_005835.1	1162777	1163734	TT_RS06065	-
NC_005835.1	1665953	1666003	20.1861	6.24126	-	NC_005835.1	1665841	1666045	TT_RS08930	-
NC_005835.1	852459	852520	13.2845	6.24125	-	NC_005835.1	851928	853008	TT_RS04440	-
NC_005835.1	1457880	1457904	13.2845	6.24125	+	NC_005835.1	1457667	1459482	TT_RS07730	+
NC_005835.1	1564560	1564622	26.3182	6.24093	+	NC_005835.1	1564400	1565168	TT_RS08335	+
NC_005835.1	493340	493414	31.9688	6.23991	-	NC_005835.1	492935	493706	TT_RS02580	-
NC_005835.1	1437190	1437230	18.5998	6.23989	-	NC_005835.1	1436788	1437976	TT_RS07640	-
NC_005835.1	888595	888626	13.2494	6.23989	-	NC_005835.1	888504	890241	TT_RS04590	-
NC_005835.1	1580769	1580881	13.2494	6.23989	-	NC_005835.1	1579993	1580959	TT_RS08450	-
NC_005838.1	105961	106003	13.2494	6.23989	-	NC_005838.1	105709	106120	TT_RS10700	-
NC_005835.1	1773047	1773159	20.4555	6.23917	-	NC_005835.1	1772538	1773495	TT_RS09520	-
NC_005835.1	1611415	1611446	14.1652	6.23852	+	NC_005835.1	1610661	1613352	TT_RS08620	+
NC_005835.1	775189	775266	18.7265	6.23784	+	NC_005835.1	774942	775887	TT_RS04015	+
NC_005835.1	1515088	1515294	49.9756	6.23729	-	NC_005835.1	1514845	1515340	TT_RS08085	-
NC_005835.1	1277457	1277572	42.4829	6.23674	+	NC_005835.1	1276881	1277628	TT_RS06770	+
NC_005835.1	1495778	1495838	18.493	6.23578	-	NC_005835.1	1495549	1496017	TT_RS07970	-
NC_005835.1	1443163	1443212	14.9042	6.23578	-	NC_005835.1	1442485	1443349	TT_RS07670	-
NC_005835.1	1171145	1171212	13.2151	6.23578	-	NC_005835.1	1170896	1171259	TT_RS06100	-
NC_005835.1	1592648	1592700	22.1877	6.23235	-	NC_005835.1	1592431	1593652	TT_RS08510	-
NC_005835.1	1414904	1414934	13.798	6.23164	+	NC_005835.1	1414440	1415736	TT_RS07525	+
NC_005835.1	1574090	1574115	13.798	6.23164	+	NC_005835.1	1573768	1574494	TT_RS08410	+
NC_005835.1	765556	765601	46.9997	6.23147	-	NC_005835.1	765537	765999	TT_RS03965	-
NC_005835.1	1543305	1543418	24.0992	6.22922	-	NC_005835.1	1541857	1544527	TT_RS08215	-
NC_005835.1	921807	921835	13.3942	6.22887	-	NC_005835.1	920977	922300	TT_RS04760	-
NC_005835.1	1206663	1206693	13.3942	6.22887	-	NC_005835.1	1206580	1207108	TT_RS06310	-
NC_005835.1	1665542	1665574	13.3942	6.22887	-	NC_005835.1	1664233	1665589	TT_RS08925	-
NC_005835.1	1663420	1663502	26.2016	6.22813	-	NC_005835.1	1662837	1664232	TT_RS08920	-
NC_005835.1	181922	181964	18.4595	6.2261	+	NC_005835.1	179497	187516	TT_RS01015	+
NC_005835.1	796110	796149	19.8611	6.22541	-	NC_005835.1	794868	796173	TT_RS04105	-
NC_005835.1	668220	668290	22.8635	6.22472	-	NC_005835.1	667369	668347	TT_RS03490	-
NC_005835.1	1124983	1125074	25.3707	6.22426	-	NC_005835.1	1124474	1126082	TT_RS05850	-
NC_005835.1	1268403	1268465	39.2334	6.21961	-	NC_005835.1	1268243	1270319	TT_RS06715	-
NC_005835.1	1477741	1477810	26.2386	6.21912	+	NC_005835.1	1477586	1478183	TT_RS07865	+
NC_005835.1	20422	20490	13.1487	6.2191	+	NC_005835.1	19891	21529	TT_RS00110	+
NC_005835.1	1751426	1751478	13.1487	6.2191	+	NC_005835.1	1750437	1752084	TT_RS09380	+
NC_005835.1	536281	536330	19.254	6.2184	+	NC_005835.1	535310	536483	TT_RS02785	+
NC_005835.1	152316	152437	37.9451	6.21772	+	NC_005835.1	152152	153187	TT_RS00870	+
NC_005835.1	796684	796725	14.2063	6.21769	-	NC_005835.1	796213	797071	TT_RS04110	-
NC_005835.1	654167	654188	18.3378	6.21487	+	NC_005835.1	653359	654217	TT_RS03390	+
NC_005835.1	1529421	1529474	13.8379	6.21487	-	NC_005835.1	1528501	1529488	TT_RS08150	-
NC_005835.1	133668	133719	13.3771	6.21487	+	NC_005835.1	132536	133853	TT_RS00765	+
NC_005835.1	707594	707648	25.0468	6.21253	+	NC_005835.1	707239	707824	TT_RS03670	+
NC_005835.1	1719736	1719792	38.7245	6.20923	+	NC_005835.1	1719610	1719850	TT_RS09200	+
NC_005835.1	843016	843064	17.3885	6.20919	+	NC_005835.1	842587	843193	TT_RS04385	+
NC_005835.1	1166171	1166215	12.9595	6.20918	-	NC_005835.1	1165960	1166779	TT_RS06080	-
NC_005835.1	1841025	1841154	31.8535	6.20684	+	NC_005835.1	1840329	1842804	TT_RS09830	+
NC_005835.1	1509910	1509966	14.9475	6.20633	+	NC_005835.1	1509123	1510176	TT_RS08060	+
NC_005835.1	41268	41329	13.4711	6.20633	-	NC_005835.1	40870	42001	TT_RS00215	-
NC_005835.1	49006	49060	13.4711	6.20633	-	NC_005835.1	47771	49658	TT_RS00260	-
NC_005835.1	978023	978075	13.4711	6.20633	+	NC_005835.1	977509	978763	TT_RS05040	+
NC_005835.1	1471421	1471460	13.0312	6.20633	-	NC_005835.1	1471089	1472220	TT_RS07820	-
NC_005835.1	1370659	1370706	13.1166	6.20633	+	NC_005835.1	1370626	1370761	TT_RS11425	+
NC_005835.1	1698004	1698074	16.8845	6.20618	+	NC_005835.1	1697046	1698126	TT_RS09105	+
NC_005835.1	538833	538885	21.31	6.20563	+	NC_005835.1	538448	540683	TT_RS02805	+
NC_005835.1	741161	741220	16.013	6.2047	-	NC_005835.1	740509	741847	TT_RS03845	-
NC_005835.1	1275461	1275511	19.2369	6.20126	-	NC_005835.1	1275337	1276120	TT_RS06760	-
NC_005835.1	1467613	1467674	33.0665	6.2009	-	NC_005835.1	1467471	1468317	TT_RS07785	-
NC_005835.1	244312	244381	13.0681	6.20058	+	NC_005835.1	241631	245189	TT_RS01290	+
NC_005835.1	972166	972201	13.0681	6.20058	+	NC_005835.1	971722	974140	TT_RS05000	+
NC_005835.1	1512067	1512104	13.0681	6.20058	+	NC_005835.1	1510172	1512530	TT_RS08065	+
NC_005835.1	1068392	1068427	60.7209	6.19949	-	NC_005835.1	1068266	1068689	TT_RS05560	-
NC_005835.1	504201	504297	17.0399	6.19879	-	NC_005835.1	503268	504534	TT_RS02635	-
NC_005835.1	1499030	1499092	23.3899	6.1948	+	NC_005835.1	1499010	1499355	TT_RS07995	+
NC_005835.1	1442961	1443050	17.9573	6.1948	-	NC_005835.1	1442485	1443349	TT_RS07670	-
NC_005835.1	335554	335612	13.8787	6.19479	-	NC_005835.1	334861	336025	TT_RS01775	-
NC_005835.1	337541	337605	19.7264	6.19334	+	NC_005835.1	337123	338239	TT_RS01785	+
NC_005835.1	753814	753854	18.0159	6.19334	+	NC_005835.1	752876	755018	TT_RS03925	+
NC_005835.1	171563	171634	14.2482	6.19333	+	NC_005835.1	170972	172163	TT_RS00970	+
NC_005835.1	462233	462282	14.2482	6.19333	-	NC_005835.1	460855	463459	TT_RS02400	-
NC_005835.1	224183	224221	15.3204	6.19188	-	NC_005835.1	223332	224958	TT_RS01195	-
NC_005835.1	755417	755460	13.1059	6.19187	+	NC_005835.1	755074	756796	TT_RS03930	+
NC_005835.1	194658	194751	12.8578	6.19187	-	NC_005835.1	194178	195168	TT_RS01055	-
NC_005835.1	1391699	1391750	25.6289	6.19043	-	NC_005835.1	1391456	1392641	TT_RS07420	-
NC_005835.1	79421	79454	13.5108	6.19041	+	NC_005835.1	79386	80013	TT_RS00440	+
NC_005835.1	1520172	1520192	13.5108	6.19041	-	NC_005835.1	1519681	1520431	TT_RS08115	-
NC_005835.1	419728	419899	17.5256	6.18935	-	NC_005835.1	419181	420117	TT_RS02185	-
NC_005835.1	1378416	1378498	27.2525	6.18802	-	NC_005835.1	1377887	1382462	TT_RS07380	-
NC_005835.1	917514	917561	21.8475	6.18602	-	NC_005835.1	916654	917703	TT_RS04735	-
NC_005835.1	463036	463184	21.1987	6.1806	-	NC_005835.1	460855	463459	TT_RS02400	-
NC_005835.1	794078	794120	13.1445	6.18009	-	NC_005835.1	793514	794855	TT_RS04100	-
NC_005835.1	1667476	1667518	12.8255	6.18009	-	NC_005835.1	1667031	1668135	TT_RS08940	-
NC_005835.1	1692410	1692480	12.8255	6.18009	-	NC_005835.1	1692262	1694275	TT_RS09085	-
NC_005835.1	1274442	1274504	23.7203	6.17912	-	NC_005835.1	1273978	1275334	TT_RS06755	-
NC_005835.1	1258019	1258050	23.012	6.17912	-	NC_005835.1	1258003	1258456	TT_RS06605	-
NC_005835.1	1840551	1840609	19.2468	6.17713	+	NC_005835.1	1840329	1842804	TT_RS09830	+
NC_005835.1	129373	129417	16.7296	6.17713	+	NC_005835.1	129229	130960	TT_RS00750	+
NC_005835.1	1522446	1522526	25.113	6.17565	-	NC_005835.1	1521173	1522967	TT_RS08125	-
NC_005835.1	1391410	1391430	18.8875	6.17564	-	NC_005835.1	1390863	1391460	TT_RS07415	-
NC_005835.1	1494351	1494403	12.7058	6.17563	-	NC_005835.1	1494279	1495443	TT_RS07965	-
NC_005835.1	1694210	1694270	12.7058	6.17563	-	NC_005835.1	1692262	1694275	TT_RS09085	-
NC_005835.1	722401	722475	12.6349	6.17563	-	NC_005835.1	721655	722517	TT_RS03740	-
NC_005835.1	1365502	1365527	12.6349	6.17563	+	NC_005835.1	1365271	1366492	TT_RS07300	+
NC_005835.1	1646581	1646698	28.9662	6.17266	+	NC_005835.1	1645377	1646955	TT_RS08775	+
NC_005835.1	407501	407536	17.7606	6.17264	-	NC_005835.1	405922	408310	TT_RS02120	-
NC_005835.1	1672428	1672483	14.9918	6.17264	-	NC_005835.1	1672306	1673533	TT_RS08975	-
NC_005835.1	336398	336472	17.6652	6.17189	-	NC_005835.1	336041	336515	TT_RS01780	-
NC_005835.1	591973	592004	13.9205	6.17113	-	NC_005835.1	591471	592083	TT_RS03090	-
NC_005835.1	957899	957928	13.9205	6.17113	-	NC_005835.1	957042	958215	TT_RS04925	-
NC_005835.1	1762060	1762093	13.5514	6.17113	+	NC_005835.1	1761389	1763210	TT_RS09445	+
NC_005835.1	1111272	1111310	12.7424	6.17113	-	NC_005835.1	1111079	1112252	TT_RS05770	-
NC_005835.1	1157705	1157745	12.6006	6.17113	-	NC_005835.1	1157596	1158208	TT_RS06030	-
NC_005835.1	373234	373283	23.0432	6.16663	-	NC_005835.1	372651	373326	TT_RS01950	-
NC_005835.1	1551666	1551763	25.6652	6.16626	-	NC_005835.1	1551649	1553476	TT_RS08260	-
NC_005835.1	1042573	1042696	22.8696	6.16529	-	NC_005835.1	1042090	1043005	TT_RS05425	-
NC_005838.1	109307	109381	34.0734	6.16513	+	NC_005838.1	109072	110260	TT_RS10715	+
NC_005835.1	921075	921124	22.69	6.16511	-	NC_005835.1	920977	922300	TT_RS04760	-
NC_005835.1	117326	117361	14.2911	6.1651	+	NC_005835.1	117217	117913	TT_RS00680	+
NC_005835.1	713994	714090	13.5822	6.1651	-	NC_005835.1	713753	715010	TT_RS03710	-
NC_005835.1	1323118	1323203	18.1756	6.165	+	NC_005835.1	1323116	1324712	TT_RS07055	+
NC_005835.1	1456629	1456690	127.004	6.1641	-	NC_005835.1	1454320	1457167	TT_RS07725	-
NC_005835.1	1188814	1188849	21.5859	6.1641	-	NC_005835.1	1188246	1188867	TT_RS06190	-
NC_005835.1	295934	295993	12.7799	6.16358	-	NC_005835.1	295216	296266	TT_RS01565	-
NC_005835.1	907047	907110	12.7799	6.16358	-	NC_005835.1	906466	907477	TT_RS04675	-
NC_005835.1	1057852	1057873	12.7799	6.16358	+	NC_005835.1	1057418	1057973	TT_RS05495	+
NC_005835.1	775630	775682	12.5672	6.16358	+	NC_005835.1	774942	775887	TT_RS04015	+
NC_005835.1	1237817	1237920	24.1412	6.16231	-	NC_005835.1	1235684	1237919	TT_RS06470	-
NC_005835.1	915697	915742	21.7098	6.16055	-	NC_005835.1	914679	915819	TT_RS04725	-
NC_005835.1	889911	889951	19.2824	6.15978	-	NC_005835.1	888504	890241	TT_RS04590	-
NC_005835.1	1226093	1226161	25.0276	6.15865	-	NC_005835.1	1226025	1226406	TT_RS06420	-
NC_005835.1	117385	117464	19.0288	6.15617	+	NC_005835.1	117217	117913	TT_RS00680	+
NC_005835.1	1761269	1761314	35.5392	6.15496	+	NC_005835.1	1761146	1761380	TT_RS09440	+
NC_005835.1	1574255	1574306	21.1583	6.15391	+	NC_005835.1	1573768	1574494	TT_RS08410	+
NC_005835.1	1270507	1270531	21.1835	6.15289	-	NC_005835.1	1270321	1270792	TT_RS06720	-
NC_005835.1	409559	409582	17.8174	6.15288	-	NC_005835.1	409102	409849	TT_RS02130	-
NC_005835.1	1014880	1014952	17.8174	6.15288	-	NC_005835.1	1014629	1015058	TT_RS05255	-
NC_005835.1	1414652	1414682	12.8182	6.15287	+	NC_005835.1	1414440	1415736	TT_RS07525	+
NC_005835.1	23390	23506	21.3879	6.15211	-	NC_005835.1	22905	23895	TT_RS00130	-
NC_005835.1	1112477	1112547	17.3446	6.14824	-	NC_005835.1	1112294	1112975	TT_RS05775	-
NC_005835.1	915766	915798	13.593	6.14823	-	NC_005835.1	914679	915819	TT_RS04725	-
NC_005835.1	1043945	1044020	13.593	6.14823	+	NC_005835.1	1043080	1045939	TT_RS05430	+
NC_005835.1	1439438	1439459	13.593	6.14823	-	NC_005835.1	1438772	1440752	TT_RS07650	-
NC_005835.1	1686502	1686580	13.2243	6.14668	-	NC_005835.1	1685533	1686661	TT_RS09055	-
NC_005835.1	994011	994066	50.2505	6.14595	+	NC_005835.1	993507	994089	TT_RS05135	+
NC_005835.1	298081	298110	24.8251	6.14358	-	NC_005835.1	297724	298393	TT_RS01580	-
NC_005835.1	218914	218960	13.9632	6.14356	-	NC_005835.1	218822	219776	TT_RS01170	-
NC_005835.1	1719162	1719224	12.3808	6.14356	+	NC_005835.1	1719010	1719550	TT_RS09195	+
NC_005835.1	356930	356986	12.3453	6.14356	+	NC_005835.1	356873	358250	TT_RS01885	+
NC_005835.1	1400791	1400836	35.417	6.14047	-	NC_005835.1	1400579	1400987	TT_RS07470	-
NC_005835.1	1235930	1236004	18.2395	6.14044	-	NC_005835.1	1235684	1237919	TT_RS06470	-
NC_005835.1	706016	706082	12.4171	6.14043	+	NC_005835.1	705099	706440	TT_RS03660	+
NC_005835.1	173783	173847	12.3107	6.14043	-	NC_005835.1	172515	174984	TT_RS00980	-
NC_005835.1	355034	355135	30.1006	6.13944	+	NC_005835.1	354832	356071	TT_RS01875	+
NC_005835.1	1613235	1613287	21.0615	6.13888	+	NC_005835.1	1610661	1613352	TT_RS08620	+
NC_005835.1	242241	242363	20.3588	6.1386	+	NC_005835.1	241631	245189	TT_RS01290	+
NC_005835.1	155539	155586	23.4453	6.13783	-	NC_005835.1	155469	157680	TT_RS00885	-
NC_005835.1	301242	301264	35.4174	6.13417	-	NC_005835.1	299799	301557	TT_RS01595	-
NC_005835.1	191574	191691	12.4542	6.13413	+	NC_005835.1	190988	192404	TT_RS01040	+
NC_005835.1	502849	502892	12.4542	6.13413	-	NC_005835.1	502168	503278	TT_RS02630	-
NC_005835.1	264871	264966	30.703	6.13258	-	NC_005835.1	264003	265245	TT_RS01420	-
NC_005835.1	1292163	1292210	14.3352	6.13255	+	NC_005835.1	1291242	1293639	TT_RS06855	+
NC_005835.1	1797450	1797523	14.3352	6.13255	+	NC_005835.1	1796199	1797633	TT_RS09610	+
NC_005835.1	1306881	1306967	44.5965	6.12811	-	NC_005835.1	1306630	1307599	TT_RS06955	-
NC_005835.1	1110893	1111024	12.0167	6.12786	-	NC_005835.1	1110336	1111083	TT_RS05765	-
NC_005835.1	25790	25894	12.4519	6.12702	-	NC_005835.1	23891	26366	TT_RS00135	-
NC_005835.1	218695	218724	18.6331	6.12699	-	NC_005835.1	217461	218835	TT_RS01165	-
NC_005835.1	1170280	1170321	18.6331	6.12699	-	NC_005835.1	1169590	1170628	TT_RS06090	-
NC_005835.1	1527775	1527843	15.7421	6.12618	+	NC_005835.1	1527076	1528501	TT_RS08145	+
NC_005835.1	1853155	1853215	22.0771	6.1246	+	NC_005835.1	1852561	1853647	TT_RS09895	+
NC_005835.1	1811241	1811275	13.2657	6.12458	-	NC_005835.1	1810778	1812227	TT_RS09695	-
NC_005835.1	36604	36713	12.734	6.12458	+	NC_005835.1	36265	37051	TT_RS00190	+
NC_005835.1	353883	353946	12.4922	6.12458	+	NC_005835.1	353170	354235	TT_RS01865	+
NC_005835.1	281146	281188	12.2441	6.12458	-	NC_005835.1	280583	281957	TT_RS01485	-
NC_005835.1	1729376	1729429	223.04	6.12226	-	NC_005835.1	1728911	1729424	TT_RS09270	-
NC_005835.1	1729376	1729429	223.04	6.12226	-	NC_005835.1	1729380	1729467	TT_RS09275	-
NC_005835.1	1637205	1637260	17.359	6.12218	-	NC_005835.1	1636618	1637404	TT_RS08730	-
NC_005835.1	875156	875249	13.6355	6.12137	+	NC_005835.1	874714	876487	TT_RS04535	+
NC_005835.1	1013594	1013668	13.6355	6.12137	-	NC_005835.1	1012701	1014633	TT_RS05250	-
NC_005835.1	120957	121061	16.1671	6.12069	-	NC_005835.1	120850	121906	TT_RS00700	-
NC_005835.1	222966	223043	25.545	6.11924	-	NC_005835.1	222571	223333	TT_RS01190	-
NC_005835.1	535404	535447	19.3556	6.11896	+	NC_005835.1	535310	536483	TT_RS02785	+
NC_005835.1	122644	122714	18.9207	6.11792	-	NC_005835.1	121902	123012	TT_RS00705	-
NC_005835.1	1386299	1386455	52.0185	6.11563	-	NC_005835.1	1386040	1386682	TT_RS07390	-
NC_005835.1	762064	762216	14.7589	6.11513	-	NC_005835.1	759600	762492	TT_RS03945	-
NC_005835.1	464322	464394	17.1088	6.1149	+	NC_005835.1	464088	464535	TT_RS02410	+
NC_005835.1	908575	908681	26.5251	6.11351	-	NC_005835.1	908379	908940	TT_RS04690	-
NC_005835.1	66976	67082	12.4423	6.1124	-	NC_005835.1	65912	67205	TT_RS00365	-
NC_005835.1	921018	921060	16.9432	6.11165	-	NC_005835.1	920977	922300	TT_RS04760	-
NC_005835.1	1191875	1191926	14.0071	6.11164	-	NC_005835.1	1191295	1191946	TT_RS06210	-
NC_005835.1	1500606	1500638	12.5311	6.11164	+	NC_005835.1	1500432	1500903	TT_RS08010	+
NC_005835.1	1086646	1086687	24.3737	6.11003	-	NC_005835.1	1086635	1087070	TT_RS05650	-
NC_005835.1	1682799	1682840	38.8323	6.10943	-	NC_005835.1	1682778	1683156	TT_RS09035	-
NC_005835.1	538045	538102	22.8166	6.10839	+	NC_005835.1	537202	538447	TT_RS02800	+
NC_005835.1	1468977	1469059	17.95	6.10838	-	NC_005835.1	1468903	1469395	TT_RS07800	-
NC_005835.1	1215842	1215913	12.0921	6.10837	-	NC_005835.1	1215780	1216371	TT_RS06375	-
NC_005835.1	1438608	1438682	18.1581	6.10615	-	NC_005835.1	1437986	1438769	TT_RS07645	-
NC_005835.1	1384054	1384133	25.4443	6.1058	-	NC_005835.1	1382491	1385851	TT_RS07385	-
NC_005838.1	208319	208534	22.8033	6.10457	-	NC_005838.1	207698	209327	TT_RS11160	-
NC_005835.1	1314011	1314046	12.1288	6.10343	-	NC_005835.1	1313887	1314220	TT_RS06995	-
NC_005838.1	109872	109912	12.1288	6.10343	+	NC_005838.1	109072	110260	TT_RS10715	+
NC_005835.1	254632	254677	11.987	6.10343	-	NC_005835.1	253914	254982	TT_RS01360	-
NC_005835.1	771312	771395	11.987	6.10343	+	NC_005835.1	770448	771675	TT_RS03990	+
NC_005835.1	1819908	1819984	12.7281	6.10214	-	NC_005835.1	1819863	1820403	TT_RS09730	-
NC_005835.1	1749804	1749899	27.4031	6.10098	+	NC_005835.1	1749272	1750460	TT_RS09375	+
NC_005835.1	390923	391015	21.7957	6.10014	+	NC_005835.1	390420	391995	TT_RS02045	+
NC_005835.1	619422	619474	16.7325	6.10013	+	NC_005835.1	619237	620206	TT_RS03210	+
NC_005835.1	128293	128330	12.9386	6.10012	+	NC_005835.1	126617	128348	TT_RS00740	+
NC_005835.1	1376954	1377009	12.9386	6.10012	-	NC_005835.1	1376155	1377016	TT_RS07365	-
NC_005835.1	1376954	1377009	12.9386	6.10012	-	NC_005835.1	1376985	1377225	TT_RS07370	-
NC_005835.1	848993	849024	16.8212	6.09847	-	NC_005835.1	848117	849173	TT_RS04420	-
NC_005835.1	785569	785628	13.308	6.09846	-	NC_005835.1	785300	787889	TT_RS04075	-
NC_005835.1	1481526	1481564	13.308	6.09846	-	NC_005835.1	1481034	1481754	TT_RS07880	-
NC_005835.1	1505363	1505447	13.308	6.09846	+	NC_005835.1	1504999	1506853	TT_RS08045	+
NC_005835.1	1176559	1176619	22.4939	6.09515	-	NC_005835.1	1175488	1177039	TT_RS06130	-
NC_005835.1	1208936	1208976	21.4342	6.09515	-	NC_005835.1	1208914	1209238	TT_RS06330	-
NC_005835.1	1647117	1647190	20.775	6.09515	-	NC_005835.1	1647039	1647483	TT_RS08780	-
NC_005835.1	1812434	1812491	20.775	6.09515	-	NC_005835.1	1812231	1813278	TT_RS09700	-
NC_005835.1	991289	991358	17.2366	6.09514	+	NC_005835.1	990629	991634	TT_RS05120	+
NC_005835.1	1825109	1825151	14.3805	6.09513	-	NC_005835.1	1824391	1825708	TT_RS09750	-
NC_005835.1	347425	347477	12.5709	6.09513	-	NC_005835.1	347335	348601	TT_RS01830	-
NC_005835.1	849298	849340	12.5709	6.09513	-	NC_005835.1	849169	849949	TT_RS04425	-
NC_005835.1	1465945	1465971	12.5709	6.09513	-	NC_005835.1	1465603	1466413	TT_RS07775	-
NC_005835.1	1603162	1603218	12.5709	6.09513	+	NC_005835.1	1602537	1604115	TT_RS08560	+
NC_005835.1	1393152	1393194	12.1665	6.09513	-	NC_005835.1	1392613	1393399	TT_RS07425	-
NC_005835.1	1664297	1664332	11.9538	6.09513	-	NC_005835.1	1664233	1665589	TT_RS08925	-
NC_005835.1	753556	753645	28.9554	6.09321	+	NC_005835.1	752876	755018	TT_RS03925	+
NC_005835.1	1257495	1257543	33.3243	6.09287	-	NC_005835.1	1256685	1258002	TT_RS06600	-
NC_005835.1	338415	338445	17.9847	6.09263	+	NC_005835.1	338360	339254	TT_RS01790	+
NC_005835.1	123304	123350	13.6792	6.09011	-	NC_005835.1	123008	123503	TT_RS00710	-
NC_005835.1	825346	825405	13.6792	6.09011	-	NC_005835.1	825307	826870	TT_RS04290	-
NC_005835.1	978357	978412	18.7055	6.08759	+	NC_005835.1	977509	978763	TT_RS05040	+
NC_005835.1	147657	147735	18.6495	6.08736	+	NC_005835.1	147247	148465	TT_RS00845	+
NC_005835.1	26192	26277	19.8796	6.08535	-	NC_005835.1	23891	26366	TT_RS00135	-
NC_005835.1	1653370	1653405	94.7336	6.08425	+	NC_005835.1	1653336	1653412	TT_RS08850	+
NC_005835.1	1615114	1615146	26.3759	6.0838	+	NC_005835.1	1614584	1615952	TT_RS08630	+
NC_005835.1	916068	916214	30.0556	6.08351	-	NC_005835.1	915821	916655	TT_RS04730	-
NC_005835.1	809154	809192	22.1247	6.08336	+	NC_005835.1	808784	809573	TT_RS04185	+
NC_005835.1	1543481	1543541	21.8174	6.08336	-	NC_005835.1	1541857	1544527	TT_RS08215	-
NC_005835.1	28085	28156	19.7572	6.08336	-	NC_005835.1	27402	28413	TT_RS00145	-
NC_005835.1	444554	444600	16.8822	6.08335	+	NC_005835.1	444125	445025	TT_RS02320	+
NC_005835.1	1127477	1127559	12.2051	6.08335	+	NC_005835.1	1126353	1127577	TT_RS05860	+
NC_005835.1	1426885	1426934	12.2051	6.08335	+	NC_005835.1	1426087	1427779	TT_RS07575	+
NC_005835.1	1460977	1461016	12.2051	6.08335	-	NC_005835.1	1460264	1461242	TT_RS07745	-
NC_005838.1	58498	58538	11.9215	6.08335	-	NC_005838.1	58442	58577	TT_RS11485	-
NC_005835.1	1385607	1385649	23.9757	6.08167	-	NC_005835.1	1382491	1385851	TT_RS07385	-
NC_005835.1	1013149	1013243	19.0678	6.07996	-	NC_005835.1	1012701	1014633	TT_RS05250	-
NC_005835.1	1681688	1681834	18.8736	6.07688	+	NC_005835.1	1681613	1682729	TT_RS09030	+
NC_005835.1	953992	954039	16.9141	6.07482	+	NC_005835.1	952490	954068	TT_RS04905	+
NC_005835.1	1788696	1788765	16.9141	6.07482	-	NC_005835.1	1787737	1789366	TT_RS09575	-
NC_005835.1	437763	437797	16.5999	6.07482	-	NC_005835.1	437236	438010	TT_RS02275	-
NC_005835.1	1011060	1011110	15.7908	6.07482	-	NC_005835.1	1010775	1011756	TT_RS05235	-
NC_005835.1	264616	264659	14.0522	6.07481	-	NC_005835.1	264003	265245	TT_RS01420	-
NC_005835.1	373338	373362	12.6117	6.07481	-	NC_005835.1	373313	374165	TT_RS01955	-
NC_005835.1	1591938	1591991	12.6117	6.07481	-	NC_005835.1	1591274	1592432	TT_RS08505	-
NC_005835.1	293843	293878	11.7675	6.07481	-	NC_005835.1	293203	294112	TT_RS01555	-
NC_005835.1	1834130	1834197	11.7675	6.07481	-	NC_005835.1	1834028	1834640	TT_RS09820	-
NC_005835.1	1430084	1430135	11.732	6.07481	+	NC_005835.1	1429007	1430822	TT_RS07590	+
NC_005835.1	1511193	1511312	16.3026	6.07275	+	NC_005835.1	1510172	1512530	TT_RS08065	+
NC_005838.1	14848	14944	29.2297	6.0714	+	NC_005838.1	14449	15097	TT_RS10225	+
NC_005835.1	1135279	1135345	14.7557	6.07137	-	NC_005835.1	1133651	1135364	TT_RS05900	-
NC_005835.1	1478607	1478756	27.0337	6.07105	+	NC_005835.1	1478179	1479850	TT_RS07870	+
NC_005835.1	122405	122472	16.5815	6.06791	-	NC_005835.1	121902	123012	TT_RS00705	-
NC_005835.1	1247956	1248000	16.5295	6.06791	-	NC_005835.1	1247413	1248049	TT_RS06525	-
NC_005835.1	1540599	1540636	16.5815	6.06791	-	NC_005835.1	1539339	1540749	TT_RS08205	-
NC_005835.1	865735	865776	12.2446	6.06791	-	NC_005835.1	863090	866084	TT_RS04490	-
NC_005835.1	1439912	1439952	12.2446	6.06791	-	NC_005835.1	1438772	1440752	TT_RS07650	-
NC_005835.1	1090743	1090800	11.8902	6.06791	-	NC_005835.1	1089863	1092428	TT_RS05675	-
NC_005835.1	1720563	1720590	58.9875	6.06467	-	NC_005835.1	1720513	1720735	TT_RS09210	-
NC_005838.1	10401	10442	28.1969	6.06446	+	NC_005838.1	10381	11245	TT_RS10200	+
NC_005835.1	1383462	1383502	20.7924	6.06445	-	NC_005835.1	1382491	1385851	TT_RS07385	-
NC_005835.1	1075447	1075512	11.8411	6.06443	+	NC_005835.1	1071778	1076257	TT_RS05580	+
NC_005835.1	1484159	1484182	11.8411	6.06443	+	NC_005835.1	1483174	1484287	TT_RS07905	+
NC_005835.1	1752214	1752313	14.2835	6.05905	+	NC_005835.1	1752087	1753278	TT_RS09385	+
NC_005838.1	7554	7598	46.8116	6.05612	+	NC_005838.1	7100	7757	TT_RS10180	+
NC_005835.1	243052	243090	13.7242	6.0539	+	NC_005835.1	241631	245189	TT_RS01290	+
NC_005835.1	660502	660588	13.7242	6.0539	-	NC_005835.1	660328	661984	TT_RS03445	-
NC_005835.1	1436034	1436077	11.8793	6.0539	-	NC_005835.1	1435627	1436782	TT_RS07635	-
NC_005835.1	1718453	1718504	11.6312	6.0539	+	NC_005835.1	1718307	1719006	TT_RS09190	+
NC_005835.1	1885635	1885670	11.6312	6.0539	+	NC_005835.1	1885401	1886034	TT_RS10080	+
NC_005835.1	717974	718013	16.9799	6.05214	+	NC_005835.1	717957	719145	TT_RS03725	+
NC_005835.1	1120260	1120300	16.9799	6.05214	+	NC_005835.1	1119930	1122108	TT_RS05835	+
NC_005835.1	1546605	1546646	21.8815	6.05096	-	NC_005835.1	1546582	1546789	TT_RS08235	-
NC_005835.1	712996	713063	16.121	6.05036	-	NC_005835.1	712941	713757	TT_RS03705	-
NC_005835.1	1012738	1012776	12.6536	6.05036	-	NC_005835.1	1012701	1014633	TT_RS05250	-
NC_005835.1	1160612	1160647	20.4892	6.04859	-	NC_005835.1	1160190	1160853	TT_RS06050	-
NC_005835.1	710156	710217	12.2851	6.04858	+	NC_005835.1	710140	710641	TT_RS03685	+
NC_005835.1	742702	742730	12.2851	6.04858	-	NC_005835.1	742435	742990	TT_RS03855	-
NC_005835.1	1140538	1140587	12.2851	6.04858	-	NC_005835.1	1139592	1141083	TT_RS05925	-
NC_005835.1	1758814	1758878	11.8598	6.04858	-	NC_005835.1	1758105	1759242	TT_RS09425	-
NC_005835.1	54046	54105	16.254	6.04501	+	NC_005835.1	53513	54557	TT_RS00295	+
NC_005835.1	143711	143763	13.024	6.04501	+	NC_005835.1	143388	143895	TT_RS00825	+
NC_005835.1	1388061	1388095	23.1107	6.04413	-	NC_005835.1	1387116	1388154	TT_RS07400	-
NC_005835.1	410216	410253	26.1373	6.03964	-	NC_005835.1	409841	410831	TT_RS02135	-
NC_005835.1	352211	352274	11.9186	6.03961	-	NC_005835.1	352108	352726	TT_RS01855	-
NC_005835.1	174214	174281	11.5996	6.03961	-	NC_005835.1	172515	174984	TT_RS00980	-
NC_005835.1	880005	880060	11.4083	6.03781	-	NC_005835.1	879811	881032	TT_RS04555	-
NC_005835.1	1534242	1534277	11.4083	6.03781	-	NC_005835.1	1534188	1534323	TT_RS11435	-
NC_005835.1	1439256	1439326	21.5593	6.03722	-	NC_005835.1	1438772	1440752	TT_RS07650	-
NC_005835.1	1188177	1188217	19.328	6.03359	-	NC_005835.1	1187679	1188231	TT_RS06185	-
NC_005835.1	708761	708805	26.5104	6.03239	+	NC_005835.1	707820	709056	TT_RS03675	+
NC_005835.1	224988	225058	18.093	6.03238	-	NC_005835.1	224983	225439	TT_RS01200	-
NC_005835.1	1561317	1561414	16.2701	6.03237	-	NC_005835.1	1560596	1561727	TT_RS08315	-
NC_005835.1	1072866	1072915	13.3963	6.03237	+	NC_005835.1	1071778	1076257	TT_RS05580	+
NC_005835.1	1122322	1122346	11.5161	6.03236	+	NC_005835.1	1122100	1123492	TT_RS05840	+
NC_005835.1	662862	662904	11.3743	6.03236	-	NC_005835.1	662038	662914	TT_RS03450	-
NC_005835.1	1889425	1889453	11.3743	6.03236	-	NC_005835.1	1888757	1889750	TT_RS10105	-
NC_005835.1	799188	799262	23.7251	6.02819	-	NC_005835.1	798656	799445	TT_RS04125	-
NC_005835.1	653848	653902	38.7794	6.02684	+	NC_005835.1	653359	654217	TT_RS03390	+
NC_005835.1	1522226	1522310	15.8296	6.02505	-	NC_005835.1	1521173	1522967	TT_RS08125	-
NC_005835.1	530339	530371	12.3268	6.02504	-	NC_005835.1	527786	530813	TT_RS02750	-
NC_005835.1	964557	964632	35.5738	6.02447	-	NC_005835.1	963992	964757	TT_RS04950	-
NC_005835.1	887676	887702	15.8829	6.02413	-	NC_005835.1	887057	888494	TT_RS04585	-
NC_005835.1	1475616	1475693	23.8115	6.02329	-	NC_005835.1	1474922	1476137	TT_RS07840	-
NC_005835.1	948188	948226	16.3906	6.02321	+	NC_005835.1	947378	948542	TT_RS04880	+
NC_005835.1	1084460	1084503	16.302	6.02321	-	NC_005835.1	1084328	1084802	TT_RS05625	-
NC_005835.1	484119	484171	11.554	6.0232	+	NC_005835.1	484024	484468	TT_RS02520	+
NC_005835.1	1121993	1122023	11.554	6.0232	+	NC_005835.1	1119930	1122108	TT_RS05835	+
NC_005835.1	1289985	1290026	11.554	6.0232	+	NC_005835.1	1288363	1290547	TT_RS06840	+
NC_005835.1	107221	107281	11.3413	6.0232	-	NC_005835.1	105894	107322	TT_RS00615	-
NC_005835.1	870957	871053	11.3413	6.0232	+	NC_005835.1	869536	871723	TT_RS04520	+
NC_005835.1	1654479	1654517	53.5283	6.02141	+	NC_005835.1	1653826	1654618	TT_RS08860	+
NC_005835.1	1080606	1080658	17.0485	6.02136	-	NC_005835.1	1080082	1081243	TT_RS05600	-
NC_005835.1	1824096	1824170	15.7562	6.02136	-	NC_005835.1	1822038	1824390	TT_RS09745	-
NC_005838.1	107462	107527	15.7562	6.02136	+	NC_005838.1	106246	108001	TT_RS10705	+
NC_005835.1	702639	702682	12.6967	6.02135	+	NC_005835.1	701793	703047	TT_RS03645	+
NC_005835.1	126514	126559	11.9588	6.02135	+	NC_005835.1	126221	126599	TT_RS00735	+
NC_005835.1	1653067	1653077	11.9588	6.02135	+	NC_005835.1	1652554	1653244	TT_RS08845	+
NC_005835.1	907239	907294	11.569	6.02135	-	NC_005835.1	906466	907477	TT_RS04675	-
NC_005835.1	1085343	1085381	11.569	6.02135	-	NC_005835.1	1085219	1085666	TT_RS05635	-
NC_005835.1	994208	994216	22.3619	6.0172	+	NC_005835.1	994085	994964	TT_RS05140	+
NC_005835.1	1559366	1559451	21.775	6.01553	+	NC_005835.1	1559342	1560587	TT_RS08310	+
NC_005835.1	1637630	1637749	39.5021	6.0147	-	NC_005835.1	1637361	1638393	TT_RS08735	-
NC_005835.1	1605283	1605334	31.1607	6.01208	-	NC_005835.1	1605138	1605375	TT_RS08575	-
NC_005835.1	964501	964551	29.0124	6.01207	-	NC_005835.1	963992	964757	TT_RS04950	-
NC_005835.1	798313	798374	22.461	6.01206	-	NC_005835.1	797928	798681	TT_RS04120	-
NC_005835.1	1494679	1494733	13.7705	6.01205	-	NC_005835.1	1494279	1495443	TT_RS07965	-
NC_005835.1	1883026	1883070	13.7705	6.01205	+	NC_005835.1	1883006	1883678	TT_RS10065	+
NC_005835.1	1048857	1048906	13.0685	6.01017	+	NC_005835.1	1048651	1049410	TT_RS05450	+
NC_005835.1	1666963	1667002	13.0685	6.01017	-	NC_005835.1	1666047	1667022	TT_RS08935	-
NC_005835.1	1089722	1089757	11.3093	6.01017	-	NC_005835.1	1089464	1089854	TT_RS05670	-
NC_005835.1	410305	410338	20.4758	6.00893	-	NC_005835.1	409841	410831	TT_RS02135	-
NC_005835.1	493647	493695	31.9682	6.00738	-	NC_005835.1	492935	493706	TT_RS02580	-
NC_005835.1	27735	27807	14.6874	6.00701	-	NC_005835.1	27402	28413	TT_RS00145	-
NC_005835.1	1563402	1563451	17.2429	6.00262	+	NC_005835.1	1562961	1564401	TT_RS08330	+
NC_005835.1	1338151	1338205	11.155	6.00261	-	NC_005835.1	1338060	1339332	TT_RS07125	-
NC_005835.1	1444353	1444397	11.155	6.00261	-	NC_005835.1	1443829	1444525	TT_RS07675	-
NC_005835.1	1669979	1670028	11.155	6.00261	-	NC_005835.1	1669542	1670427	TT_RS08960	-
NC_005835.1	1689482	1689541	11.155	6.00261	+	NC_005835.1	1688479	1689619	TT_RS09070	+
NC_005835.1	1714596	1714661	11.155	6.00261	+	NC_005835.1	1712093	1718297	TT_RS09185	+
NC_005835.1	262219	262281	15.9802	6.00167	-	NC_005835.1	261253	262882	TT_RS01410	-
NC_005835.1	1744987	1745148	24.9487	5.99906	+	NC_005835.1	1744979	1746419	TT_RS09345	+
NC_005835.1	1835267	1835315	17.4441	5.99882	-	NC_005835.1	1834736	1840145	TT_RS09825	-
NC_005835.1	1722064	1722123	15.5122	5.99881	+	NC_005835.1	1722051	1723113	TT_RS09220	+
NC_005835.1	226443	226562	27.0572	5.99859	-	NC_005835.1	225451	226588	TT_RS01205	-
NC_005835.1	1335334	1335362	12.3696	5.9969	-	NC_005835.1	1334866	1335818	TT_RS07105	-
NC_005835.1	1478794	1478842	12.3696	5.9969	+	NC_005835.1	1478179	1479850	TT_RS07870	+
NC_005835.1	1323229	1323374	24.3485	5.99642	+	NC_005835.1	1323116	1324712	TT_RS07055	+
NC_005835.1	286805	286836	11.6328	5.99306	+	NC_005835.1	286571	287003	TT_RS01525	+
NC_005835.1	67647	67678	11.6328	5.99306	-	NC_005835.1	67454	67826	TT_RS11295	-
NC_005835.1	17689	17760	11.2784	5.99306	+	NC_005835.1	17080	17821	TT_RS00095	+
NC_005835.1	24647	24732	17.8038	5.99252	-	NC_005835.1	23891	26366	TT_RS00135	-
NC_005835.1	1772851	1772930	15.5974	5.99114	-	NC_005835.1	1772538	1773495	TT_RS09520	-
NC_005835.1	965969	966057	11.229	5.99113	+	NC_005835.1	965651	966332	TT_RS04960	+
NC_005835.1	1762436	1762506	28.3635	5.98988	+	NC_005835.1	1761389	1763210	TT_RS09445	+
NC_005835.1	1263263	1263306	18.6728	5.98986	-	NC_005835.1	1262881	1263601	TT_RS06670	-
NC_005835.1	1488504	1488556	12.741	5.98727	-	NC_005835.1	1488242	1488875	TT_RS07930	-
NC_005835.1	1169129	1169199	28.2322	5.98438	-	NC_005835.1	1166785	1169536	TT_RS06085	-
NC_005835.1	1152920	1153011	14.1468	5.98338	+	NC_005835.1	1152650	1154162	TT_RS06000	+
NC_005838.1	9527	9567	26.7668	5.98145	+	NC_005838.1	8965	9637	TT_RS10190	+
NC_005835.1	1247319	1247381	15.1832	5.98143	-	NC_005835.1	1246957	1247401	TT_RS06520	-
NC_005835.1	309434	309662	29.7046	5.98093	-	NC_005835.1	308991	310161	TT_RS01645	-
NC_005835.1	1308623	1308650	11.2675	5.97947	-	NC_005835.1	1308601	1309153	TT_RS06965	-
NC_005835.1	1592605	1592633	11.2675	5.97947	-	NC_005835.1	1592431	1593652	TT_RS08510	-
NC_005835.1	226592	226674	19.1717	5.97902	-	NC_005835.1	226574	227150	TT_RS01210	-
NC_005835.1	1891384	1891477	26.4286	5.97851	-	NC_005835.1	1890575	1891586	TT_RS10115	-
NC_005835.1	1505180	1505284	11.4464	5.97779	+	NC_005835.1	1504999	1506853	TT_RS08045	+
NC_005835.1	154625	154705	24.5547	5.97599	-	NC_005835.1	154187	155459	TT_RS00880	-
NC_005835.1	427765	427856	16.5095	5.97547	+	NC_005835.1	427761	428982	TT_RS02230	+
NC_005835.1	221248	221331	13.3801	5.97436	+	NC_005835.1	220724	221738	TT_RS01180	+
NC_005835.1	1813212	1813259	21.7776	5.9721	-	NC_005835.1	1812231	1813278	TT_RS09700	-
NC_005835.1	921131	921222	25.8278	5.97175	-	NC_005835.1	920977	922300	TT_RS04760	-
NC_005835.1	1014153	1014192	12.0428	5.97158	-	NC_005835.1	1012701	1014633	TT_RS05250	-
NC_005835.1	509362	509425	11.6739	5.97158	-	NC_005835.1	509133	510345	TT_RS02670	-
NC_005835.1	1089876	1089898	11.6739	5.97158	-	NC_005835.1	1089863	1092428	TT_RS05675	-
NC_005835.1	1190728	1190774	11.6739	5.97158	-	NC_005835.1	1190022	1191327	TT_RS06205	-
NC_005835.1	1231825	1231897	11.6739	5.97158	+	NC_005835.1	1231796	1232879	TT_RS06450	+
NC_005835.1	1274796	1274827	11.6739	5.97158	-	NC_005835.1	1273978	1275334	TT_RS06755	-
NC_005838.1	66310	66379	11.6739	5.97158	-	NC_005838.1	65220	66651	TT_RS10500	-
NC_005835.1	1309338	1309412	17.7297	5.97088	-	NC_005835.1	1309159	1309933	TT_RS06970	-
NC_005835.1	354053	354094	13.1145	5.9696	+	NC_005835.1	353170	354235	TT_RS01865	+
NC_005835.1	1168588	1168657	36.8499	5.96948	-	NC_005835.1	1166785	1169536	TT_RS06085	-
NC_005835.1	999815	999877	10.8314	5.96561	+	NC_005835.1	999000	1000047	TT_RS05160	+
NC_005835.1	148533	148577	10.8314	5.96561	+	NC_005835.1	148464	148926	TT_RS00850	+
NC_005835.1	1255043	1255090	21.3093	5.96363	-	NC_005835.1	1255004	1255118	TT_RS06580	-
NC_005835.1	704105	704135	16.0792	5.96362	+	NC_005835.1	704083	705103	TT_RS03655	+
NC_005838.1	208656	208726	16.0792	5.96362	-	NC_005838.1	207698	209327	TT_RS11160	-
NC_005835.1	968739	968818	14.8542	5.96362	-	NC_005835.1	968260	969259	TT_RS04980	-
NC_005835.1	1676649	1676683	12.4137	5.96361	+	NC_005835.1	1676375	1677314	TT_RS09000	+
NC_005835.1	1885707	1885739	11.3071	5.96361	+	NC_005835.1	1885401	1886034	TT_RS10080	+
NC_005835.1	1571450	1571515	10.7964	5.96361	+	NC_005835.1	1571285	1572356	TT_RS08395	+
NC_005835.1	733985	734044	18.2392	5.95893	-	NC_005835.1	733118	734051	TT_RS03795	-
NC_005835.1	1224199	1224223	21.5254	5.95759	-	NC_005835.1	1223976	1225845	TT_RS06415	-
NC_005835.1	601515	601648	19.2258	5.95759	-	NC_005835.1	600561	602043	TT_RS03140	-
NC_005835.1	498738	498807	10.9044	5.95757	+	NC_005835.1	498445	499156	TT_RS11365	+
NC_005835.1	803308	803367	10.7626	5.95757	-	NC_005835.1	802233	804321	TT_RS04145	-
NC_005835.1	1611739	1611862	19.0208	5.953	+	NC_005835.1	1610661	1613352	TT_RS08620	+
NC_005835.1	1885495	1885556	19.6307	5.94878	+	NC_005835.1	1885401	1886034	TT_RS10080	+
NC_005835.1	761438	761561	17.8277	5.94813	-	NC_005835.1	759600	762492	TT_RS03945	-
NC_005835.1	180669	180712	25.2927	5.94743	+	NC_005835.1	179497	187516	TT_RS01015	+
NC_005835.1	890676	890709	21.1212	5.94742	-	NC_005835.1	890570	891542	TT_RS04600	-
NC_005835.1	1540051	1540082	15.3692	5.94741	-	NC_005835.1	1539339	1540749	TT_RS08205	-
NC_005835.1	1149716	1149771	10.9425	5.9474	+	NC_005835.1	1148639	1150411	TT_RS05980	+
NC_005835.1	1323387	1323422	10.9425	5.9474	+	NC_005835.1	1323116	1324712	TT_RS07055	+
NC_005835.1	1825165	1825202	16.1138	5.94638	-	NC_005835.1	1824391	1825708	TT_RS09750	-
NC_005835.1	1222050	1222097	18.5554	5.94536	-	NC_005835.1	1221705	1222882	TT_RS06405	-
NC_005835.1	721463	721505	16.4725	5.94536	-	NC_005835.1	720725	721655	TT_RS03735	-
NC_005835.1	121588	121671	14.9283	5.94536	-	NC_005835.1	120850	121906	TT_RS00700	-
NC_005835.1	663092	663155	14.9004	5.94536	-	NC_005835.1	662914	664393	TT_RS03455	-
NC_005835.1	839045	839113	11.7162	5.94535	-	NC_005835.1	838584	839142	TT_RS04360	-
NC_005835.1	151235	151281	22.8931	5.94331	-	NC_005835.1	150932	152108	TT_RS00865	-
NC_005835.1	1566195	1566223	14.9571	5.9433	+	NC_005835.1	1566141	1566519	TT_RS08350	+
NC_005835.1	499709	499817	13.6017	5.94303	-	NC_005835.1	499058	500324	TT_RS02615	-
NC_005835.1	1269004	1269056	34.3689	5.9392	-	NC_005835.1	1268243	1270319	TT_RS06715	-
NC_005835.1	1159284	1159308	18.1847	5.93917	-	NC_005835.1	1158713	1159904	TT_RS06040	-
NC_005835.1	1592762	1592799	12.0866	5.93916	-	NC_005835.1	1592431	1593652	TT_RS08510	-
NC_005835.1	1436581	1436622	15.4015	5.93605	-	NC_005835.1	1435627	1436782	TT_RS07635	-
NC_005835.1	1200271	1200325	33.4228	5.93295	+	NC_005835.1	1200243	1200582	TT_RS06260	+
NC_005835.1	905747	905790	17.8833	5.93292	-	NC_005835.1	905328	906447	TT_RS04670	-
NC_005835.1	1880042	1880122	17.8833	5.93292	-	NC_005835.1	1878911	1880999	TT_RS10050	-
NC_005835.1	1752438	1752520	15.0802	5.93292	+	NC_005835.1	1752087	1753278	TT_RS09385	+
NC_005835.1	104797	104848	10.9817	5.93291	+	NC_005835.1	103915	104971	TT_RS00595	+
NC_005835.1	1497025	1497063	10.9817	5.93291	-	NC_005835.1	1496016	1497081	TT_RS07975	-
NC_005835.1	1687675	1687743	10.9817	5.93291	+	NC_005835.1	1687665	1688478	TT_RS09065	+
NC_005835.1	1814899	1814937	10.9817	5.93291	-	NC_005835.1	1813282	1815061	TT_RS09705	-
NC_005835.1	700713	700780	26.8599	5.93119	+	NC_005835.1	700249	700948	TT_RS03635	+
NC_005835.1	330972	331025	10.5436	5.92661	-	NC_005835.1	330327	332535	TT_RS01755	-
NC_005835.1	1530658	1530700	10.5436	5.92661	-	NC_005835.1	1530085	1531933	TT_RS08160	-
NC_005835.1	532221	532266	15.0481	5.92451	-	NC_005835.1	531303	532458	TT_RS02760	-
NC_005835.1	1426458	1426521	12.4593	5.9245	+	NC_005835.1	1426087	1427779	TT_RS07575	+
NC_005835.1	1390511	1390530	21.721	5.92399	-	NC_005835.1	1389890	1390913	TT_RS07410	-
NC_005835.1	707306	707336	15.4346	5.92239	+	NC_005835.1	707239	707824	TT_RS03670	+
NC_005835.1	991931	991947	15.4346	5.92239	+	NC_005835.1	991768	992902	TT_RS05125	+
NC_005835.1	1202263	1202309	13.1621	5.92238	-	NC_005835.1	1200904	1202761	TT_RS06270	-
NC_005835.1	1871853	1871935	10.5802	5.92238	-	NC_005835.1	1871536	1872091	TT_RS11460	-
NC_005835.1	1153083	1153125	10.4739	5.92238	+	NC_005835.1	1152650	1154162	TT_RS06000	+
NC_005835.1	843733	843804	14.6096	5.91813	+	NC_005835.1	843189	844227	TT_RS04390	+
NC_005835.1	864488	864535	14.6198	5.91813	-	NC_005835.1	863090	866084	TT_RS04490	-
NC_005835.1	806977	807005	11.3898	5.91813	+	NC_005835.1	806466	807129	TT_RS04170	+
NC_005835.1	1201805	1201857	11.3898	5.91813	-	NC_005835.1	1200904	1202761	TT_RS06270	-
NC_005838.1	11871	11920	26.0612	5.91387	+	NC_005838.1	11237	12317	TT_RS10205	+
NC_005835.1	1651730	1651759	15.08	5.91385	+	NC_005835.1	1651520	1652075	TT_RS08835	+
NC_005835.1	360473	360509	11.7598	5.91384	-	NC_005835.1	359747	362456	TT_RS01900	-
NC_005835.1	1215004	1215050	11.7598	5.91384	+	NC_005835.1	1214544	1215273	TT_RS06365	+
NC_005835.1	1338331	1338373	10.6179	5.91384	-	NC_005835.1	1338060	1339332	TT_RS07125	-
NC_005835.1	1612899	1612925	10.6179	5.91384	+	NC_005835.1	1610661	1613352	TT_RS08620	+
NC_005835.1	1866442	1866479	10.6179	5.91384	+	NC_005835.1	1865578	1866871	TT_RS09980	+
NC_005835.1	708867	708953	24.9552	5.90971	+	NC_005835.1	707820	709056	TT_RS03675	+
NC_005835.1	992133	992156	14.7531	5.90846	+	NC_005835.1	991768	992902	TT_RS05125	+
NC_005835.1	1094110	1094159	17.9195	5.90739	-	NC_005835.1	1093648	1094182	TT_RS05690	-
NC_005835.1	45747	45803	16.1854	5.90413	-	NC_005835.1	45268	46237	TT_RS00240	-
NC_005835.1	1220584	1220665	21.2457	5.9025	+	NC_005835.1	1219851	1220904	TT_RS06395	+
NC_005835.1	1290321	1290378	21.2457	5.9025	+	NC_005835.1	1288363	1290547	TT_RS06840	+
NC_005835.1	993732	993775	28.4741	5.90174	+	NC_005835.1	993507	994089	TT_RS05135	+
NC_005835.1	1342251	1342296	20.2747	5.90086	-	NC_005835.1	1342075	1342906	TT_RS07145	-
NC_005835.1	1570606	1570675	10.6567	5.90085	+	NC_005835.1	1570379	1571270	TT_RS08390	+
NC_005835.1	927041	927101	10.4086	5.90084	+	NC_005835.1	926212	927343	TT_RS04790	+
NC_005838.1	72647	72715	19.1717	5.8985	+	NC_005838.1	72636	72771	TT_RS11490	+
NC_005835.1	1873541	1873620	16.5464	5.89647	-	NC_005835.1	1872516	1873641	TT_RS10015	-
NC_005835.1	1258135	1258174	27.4242	5.88986	-	NC_005835.1	1258003	1258456	TT_RS06605	-
NC_005835.1	1263672	1263720	14.2913	5.88984	-	NC_005835.1	1263590	1263932	TT_RS06675	-
NC_005835.1	747580	747621	11.0638	5.88983	+	NC_005835.1	747226	747718	TT_RS03885	+
NC_005835.1	1144354	1144394	26.2984	5.88875	+	NC_005835.1	1144119	1145643	TT_RS11410	+
NC_005835.1	1750805	1750861	20.9285	5.88763	+	NC_005835.1	1750437	1752084	TT_RS09380	+
NC_005835.1	397791	397835	14.2514	5.88762	-	NC_005835.1	397618	398029	TT_RS02075	-
NC_005835.1	492543	492566	14.2514	5.88762	-	NC_005835.1	492348	492939	TT_RS02575	-
NC_005835.1	445583	445608	11.4332	5.88761	+	NC_005835.1	445058	445913	TT_RS02325	+
NC_005835.1	1567414	1567475	11.4332	5.88761	+	NC_005835.1	1566886	1567549	TT_RS08360	+
NC_005835.1	28836	28869	10.2205	5.88761	-	NC_005835.1	28468	28885	TT_RS00150	-
NC_005835.1	250576	250626	10.2205	5.88761	+	NC_005835.1	250324	252901	TT_RS01330	+
NC_005835.1	1214091	1214160	10.2205	5.88761	+	NC_005835.1	1213933	1214557	TT_RS06360	+
NC_005835.1	256021	256070	15.862	5.88539	-	NC_005835.1	255001	256252	TT_RS01365	-
NC_005835.1	779909	779989	10.1856	5.88538	-	NC_005835.1	779892	780306	TT_RS04040	-
NC_005835.1	1189749	1189821	10.1856	5.88538	-	NC_005835.1	1189409	1189997	TT_RS06200	-
NC_005835.1	23280	23369	14.2388	5.88315	-	NC_005835.1	22905	23895	TT_RS00130	-
NC_005835.1	351009	351052	10.6968	5.88314	-	NC_005835.1	350406	351081	TT_RS01845	-
NC_005835.1	1467009	1467026	10.6968	5.88314	-	NC_005835.1	1466444	1467479	TT_RS07780	-
NC_005835.1	710284	710337	10.3778	5.88314	+	NC_005835.1	710140	710641	TT_RS03685	+
NC_005835.1	991846	991912	41.046	5.88053	+	NC_005835.1	991768	992902	TT_RS05125	+
NC_005835.1	851488	851543	23.7301	5.87867	-	NC_005835.1	850798	851917	TT_RS04435	-
NC_005835.1	1658334	1658368	18.0023	5.87866	+	NC_005835.1	1658319	1659291	TT_RS08890	+
NC_005835.1	396059	396120	10.152	5.87865	-	NC_005835.1	396020	397286	TT_RS02070	-
NC_005835.1	1527477	1527503	10.4919	5.8779	+	NC_005835.1	1527076	1528501	TT_RS08145	+
NC_005835.1	976890	976999	15.6774	5.87654	+	NC_005835.1	976825	977509	TT_RS05035	+
NC_005835.1	851359	851430	27.2976	5.87642	-	NC_005835.1	850798	851917	TT_RS04435	-
NC_005835.1	1643418	1643483	17.2354	5.8764	-	NC_005835.1	1642542	1643511	TT_RS08760	-
NC_005835.1	784062	784163	14.4071	5.8764	+	NC_005835.1	782781	784782	TT_RS04065	+
NC_005835.1	331345	331408	11.8049	5.87639	-	NC_005835.1	330327	332535	TT_RS01755	-
NC_005835.1	79587	79700	27.9757	5.87586	+	NC_005835.1	79386	80013	TT_RS00440	+
NC_005835.1	1120736	1120808	25.4382	5.87472	+	NC_005835.1	1119930	1122108	TT_RS05835	+
NC_005835.1	353733	353824	20.4381	5.87414	+	NC_005835.1	353170	354235	TT_RS01865	+
NC_005835.1	842325	842406	20.4381	5.87414	+	NC_005835.1	841155	842574	TT_RS04380	+
NC_005835.1	1520016	1520061	20.4381	5.87414	-	NC_005835.1	1519681	1520431	TT_RS08115	-
NC_005835.1	897298	897353	17.26	5.87262	+	NC_005835.1	897293	898049	TT_RS04645	+
NC_005835.1	997752	997859	13.9439	5.86866	+	NC_005835.1	997292	998444	TT_RS05150	+
NC_005835.1	3232	3302	24.4059	5.86731	+	NC_005835.1	2665	3985	TT_RS00020	+
NC_005835.1	1371858	1371896	15.1808	5.8673	+	NC_005835.1	1371787	1372030	TT_RS07335	+
NC_005835.1	1392850	1392881	10.3321	5.86729	-	NC_005835.1	1392613	1393399	TT_RS07425	-
NC_005835.1	430298	430359	10.1195	5.86729	+	NC_005835.1	429959	431315	TT_RS02245	+
NC_005835.1	1345198	1345217	10.1195	5.86729	-	NC_005835.1	1344708	1345254	TT_RS07165	-
NC_005835.1	1550475	1550536	10.1195	5.86729	-	NC_005835.1	1550019	1551594	TT_RS08255	-
NC_005835.1	589620	589687	50.7997	5.86577	-	NC_005835.1	589237	589984	TT_RS03075	-
NC_005835.1	1192558	1192681	21.2623	5.86564	-	NC_005835.1	1191942	1193901	TT_RS06215	-
NC_005835.1	1390689	1390723	24.0465	5.8641	-	NC_005835.1	1389890	1390913	TT_RS07410	-
NC_005835.1	709294	709356	14.8245	5.86385	+	NC_005835.1	709068	710127	TT_RS03680	+
NC_005835.1	1031600	1031742	18.8555	5.86046	-	NC_005835.1	1031046	1033125	TT_RS05365	-
NC_005835.1	232883	232943	14.0287	5.86039	-	NC_005835.1	232836	233166	TT_RS01245	-
NC_005835.1	682612	682676	14.2488	5.86039	-	NC_005835.1	681501	682701	TT_RS03545	-
NC_005835.1	1680464	1680524	10.7381	5.86039	+	NC_005835.1	1680368	1680974	TT_RS09020	+
NC_005835.1	1177115	1177216	12.3423	5.85999	-	NC_005835.1	1177054	1177978	TT_RS06135	-
NC_005835.1	133529	133565	14.0997	5.85692	+	NC_005835.1	132536	133853	TT_RS00765	+
NC_005835.1	1188103	1188158	26.2852	5.85577	-	NC_005835.1	1187679	1188231	TT_RS06185	-
NC_005835.1	1126561	1126617	12.179	5.85575	+	NC_005835.1	1126353	1127577	TT_RS05860	+
NC_005835.1	60488	60522	22.6759	5.8511	-	NC_005835.1	59619	60534	TT_RS00335	-
NC_005835.1	1566382	1566415	16.8321	5.85109	+	NC_005835.1	1566141	1566519	TT_RS08350	+
NC_005835.1	177694	177719	11.4781	5.85108	+	NC_005835.1	177672	179184	TT_RS01005	+
NC_005835.1	771604	771659	11.4781	5.85108	+	NC_005835.1	770448	771675	TT_RS03990	+
NC_005835.1	1101523	1101564	16.2606	5.84992	-	NC_005835.1	1100716	1101592	TT_RS05720	-
NC_005835.1	347068	347203	12.5001	5.84942	-	NC_005835.1	345568	347311	TT_RS01825	-
NC_005835.1	808256	808341	38.8333	5.84917	+	NC_005835.1	808224	808788	TT_RS04180	+
NC_005835.1	1463637	1463682	19.5845	5.84639	-	NC_005835.1	1463158	1464037	TT_RS07765	-
NC_005835.1	19318	19356	15.2161	5.84639	+	NC_005835.1	18924	19868	TT_RS00105	+
NC_005835.1	66913	66973	14.9949	5.84639	-	NC_005835.1	65912	67205	TT_RS00365	-
NC_005835.1	50903	50982	12.8835	5.84638	-	NC_005835.1	50359	51076	TT_RS00270	-
NC_005835.1	795694	795717	9.93335	5.84638	-	NC_005835.1	794868	796173	TT_RS04105	-
NC_005835.1	1567689	1567719	14.118	5.84284	+	NC_005835.1	1567571	1567838	TT_RS08365	+
NC_005835.1	908500	908536	14.6166	5.84166	-	NC_005835.1	908379	908940	TT_RS04690	-
NC_005835.1	1747613	1747672	13.9202	5.84165	+	NC_005835.1	1747297	1747690	TT_RS09360	+
NC_005835.1	909943	909984	9.97002	5.84165	+	NC_005835.1	909730	911050	TT_RS04700	+
NC_005835.1	1693475	1693523	9.86372	5.84165	-	NC_005835.1	1692262	1694275	TT_RS09085	-
NC_005835.1	1165196	1165313	12.3055	5.83912	-	NC_005835.1	1163862	1165317	TT_RS06070	-
NC_005835.1	842245	842305	17.7417	5.83371	+	NC_005835.1	841155	842574	TT_RS04380	+
NC_005835.1	1187335	1187382	17.7417	5.83371	-	NC_005835.1	1186710	1187670	TT_RS06180	-
NC_005835.1	1678657	1678711	33.1116	5.83213	+	NC_005835.1	1678428	1678770	TT_RS09010	+
NC_005835.1	352572	352642	16.7755	5.8321	-	NC_005835.1	352108	352726	TT_RS01855	-
NC_005835.1	30987	31038	11.8517	5.8321	-	NC_005835.1	30935	32792	TT_RS00170	-
NC_005835.1	1059324	1059408	10.7809	5.83209	-	NC_005835.1	1058734	1060467	TT_RS05505	-
NC_005835.1	132295	132316	10.0079	5.83209	+	NC_005835.1	132040	132427	TT_RS00760	+
NC_005835.1	782177	782213	10.0079	5.83209	+	NC_005835.1	781772	782480	TT_RS04055	+
NC_005835.1	785481	785544	10.0079	5.83209	-	NC_005835.1	785300	787889	TT_RS04075	-
NC_005835.1	1692287	1692334	10.0079	5.83209	-	NC_005835.1	1692262	1694275	TT_RS09085	-
NC_005835.1	1724095	1724131	16.5607	5.8313	+	NC_005835.1	1723904	1724546	TT_RS09230	+
NC_005835.1	1698801	1699094	36.1232	5.8303	-	NC_005835.1	1698192	1699692	TT_RS09110	-
NC_005835.1	1397033	1397131	17.036	5.8297	-	NC_005835.1	1396411	1397497	TT_RS07445	-
NC_005835.1	902058	902148	13.6568	5.82969	-	NC_005835.1	901403	902432	TT_RS04660	-
NC_005835.1	1884750	1884796	16.5398	5.82889	+	NC_005835.1	1884077	1885400	TT_RS10075	+
NC_005835.1	793322	793531	32.1952	5.8273	-	NC_005835.1	792073	793546	TT_RS04095	-
NC_005835.1	793322	793531	32.1952	5.8273	-	NC_005835.1	793514	794855	TT_RS04100	-
NC_005835.1	488533	488599	19.2982	5.82486	-	NC_005835.1	488049	489060	TT_RS02550	-
NC_005835.1	1065935	1065972	14.5368	5.82485	-	NC_005835.1	1065438	1066065	TT_RS05545	-
NC_005838.1	93110	93137	13.768	5.82485	+	NC_005838.1	92781	95199	TT_RS10645	+
NC_005835.1	960748	960806	13.5916	5.82242	-	NC_005835.1	960014	961751	TT_RS04935	-
NC_005835.1	1079096	1079191	13.5916	5.82242	+	NC_005835.1	1078485	1080093	TT_RS05595	+
NC_005835.1	887059	887116	39.2182	5.82176	-	NC_005835.1	887057	888494	TT_RS04585	-
NC_005835.1	1428040	1428115	14.2891	5.81875	+	NC_005835.1	1427804	1428257	TT_RS07580	+
NC_005835.1	1885574	1885613	14.1819	5.81875	+	NC_005835.1	1885401	1886034	TT_RS10080	+
NC_005835.1	956275	956371	13.8535	5.81875	+	NC_005835.1	956031	957075	TT_RS04920	+
NC_005835.1	1247763	1247793	10.0472	5.81752	-	NC_005835.1	1247413	1248049	TT_RS06525	-
NC_005835.1	880200	880271	9.79913	5.81752	-	NC_005835.1	879811	881032	TT_RS04555	-
NC_005838.1	6675	6691	29.4963	5.80866	+	NC_005838.1	5965	7066	TT_RS10175	+
NC_005835.1	1458246	1458517	35.729	5.80695	+	NC_005835.1	1457667	1459482	TT_RS07730	+
NC_005835.1	1872020	1872079	14.5715	5.80515	-	NC_005835.1	1871536	1872091	TT_RS11460	-
NC_005835.1	1132505	1132559	9.61078	5.80515	+	NC_005835.1	1131987	1132617	TT_RS05890	+
NC_005835.1	589422	589474	29.1568	5.80456	-	NC_005835.1	589237	589984	TT_RS03075	-
NC_005835.1	1093069	1093134	20.187	5.80266	-	NC_005835.1	1092802	1093645	TT_RS05685	-
NC_005835.1	1841647	1841697	14.9296	5.80265	+	NC_005835.1	1840329	1842804	TT_RS09830	+
NC_005835.1	1677358	1677375	14.2153	5.80265	+	NC_005835.1	1677316	1678426	TT_RS09005	+
NC_005835.1	742838	742864	10.4551	5.80265	-	NC_005835.1	742435	742990	TT_RS03855	-
NC_005835.1	10008	10058	9.64686	5.80265	+	NC_005835.1	9983	11237	TT_RS00055	+
NC_005835.1	1097616	1097653	9.64686	5.80265	+	NC_005835.1	1096219	1098094	TT_RS05700	+
NC_005835.1	1831665	1831739	9.64686	5.80265	+	NC_005835.1	1831414	1831753	TT_RS09795	+
NC_005835.1	911665	911759	10.2102	5.80006	-	NC_005835.1	911533	913390	TT_RS04710	-
NC_005835.1	1061851	1061894	23.9108	5.79764	+	NC_005835.1	1061506	1061950	TT_RS05520	+
NC_005835.1	968826	968923	19.3723	5.79764	-	NC_005835.1	968260	969259	TT_RS04980	-
NC_005835.1	956659	956728	16.6646	5.79763	+	NC_005835.1	956031	957075	TT_RS04920	+
NC_005835.1	1348805	1348870	10.8251	5.79762	+	NC_005835.1	1348330	1349761	TT_RS07205	+
NC_005835.1	1693351	1693404	10.8251	5.79762	-	NC_005835.1	1692262	1694275	TT_RS09085	-
NC_005835.1	145131	145157	10.0877	5.79762	-	NC_005835.1	144754	146026	TT_RS00835	-
NC_005835.1	840889	840924	182.283	5.7974	-	NC_005835.1	840875	840962	TT_RS04375	-
NC_005835.1	718202	718243	19.0871	5.79511	+	NC_005835.1	717957	719145	TT_RS03725	+
NC_005835.1	1133533	1133623	15.2898	5.7951	-	NC_005835.1	1132566	1133637	TT_RS05895	-
NC_005835.1	1515743	1515793	9.68425	5.79509	-	NC_005835.1	1515403	1515931	TT_RS08090	-
NC_005835.1	1272710	1272785	9.54253	5.79509	+	NC_005835.1	1272509	1272986	TT_RS06735	+
NC_005835.1	1428684	1428736	13.4789	5.79129	-	NC_005835.1	1428253	1428958	TT_RS07585	-
NC_005835.1	1318914	1318958	13.3159	5.79129	-	NC_005835.1	1318194	1319340	TT_RS07025	-
NC_005835.1	974875	974936	28.0041	5.78919	+	NC_005835.1	974869	975100	TT_RS05015	+
NC_005835.1	1384274	1384333	27.6334	5.78781	-	NC_005835.1	1382491	1385851	TT_RS07385	-
NC_005835.1	1787887	1787978	14.8443	5.78735	-	NC_005835.1	1787737	1789366	TT_RS09575	-
NC_005835.1	779775	779860	13.2452	5.78719	-	NC_005835.1	779061	779889	TT_RS04035	-
NC_005835.1	931042	931170	10.0486	5.78667	+	NC_005835.1	930786	932910	TT_RS04810	+
NC_005835.1	1565500	1565520	36.7159	5.78665	+	NC_005835.1	1565256	1565661	TT_RS08340	+
NC_005835.1	1162905	1162933	13.5095	5.78233	-	NC_005835.1	1162777	1163734	TT_RS06065	-
NC_005835.1	1441747	1441790	13.5095	5.78233	-	NC_005835.1	1441441	1442134	TT_RS07660	-
NC_005835.1	1797538	1797612	12.935	5.78233	+	NC_005835.1	1796199	1797633	TT_RS09610	+
NC_005835.1	694406	694459	11.1977	5.78233	-	NC_005835.1	694000	694993	TT_RS03595	-
NC_005835.1	1637557	1637587	9.72299	5.78232	-	NC_005835.1	1637361	1638393	TT_RS08735	-
NC_005835.1	333489	333533	9.72299	5.78232	-	NC_005835.1	332905	334621	TT_RS01765	-
NC_005835.1	1178417	1178448	9.72299	5.78232	-	NC_005835.1	1177974	1178637	TT_RS06140	-
NC_005835.1	873389	873468	9.51041	5.78232	+	NC_005835.1	872126	874742	TT_RS04530	+
NC_005835.1	281316	281361	16.3401	5.78105	-	NC_005835.1	280583	281957	TT_RS01485	-
NC_005835.1	668603	668649	11.9004	5.77975	-	NC_005835.1	668349	669651	TT_RS03495	-
NC_005835.1	707484	707537	16.7861	5.77889	+	NC_005835.1	707239	707824	TT_RS03670	+
NC_005838.1	86290	86333	44.5545	5.77634	+	NC_005838.1	86007	86697	TT_RS10595	+
NC_005835.1	561425	561471	14.9667	5.77586	-	NC_005835.1	561058	562092	TT_RS11375	-
NC_005835.1	1572639	1572686	19.9793	5.77196	+	NC_005835.1	1572619	1573765	TT_RS08405	+
NC_005835.1	500882	500951	13.1216	5.77195	-	NC_005835.1	500323	501433	TT_RS02620	-
NC_005835.1	1583496	1583554	13.0759	5.77195	-	NC_005835.1	1583322	1585698	TT_RS08480	-
NC_005835.1	27839	27864	10.1298	5.77195	-	NC_005835.1	27402	28413	TT_RS00145	-
NC_005835.1	330357	330398	10.1298	5.77195	-	NC_005835.1	330327	332535	TT_RS01755	-
NC_005835.1	762714	762802	10.1298	5.77195	+	NC_005835.1	762501	763734	TT_RS03950	+
NC_005835.1	1221015	1221049	10.1298	5.77195	+	NC_005835.1	1220908	1221670	TT_RS06400	+
NC_005835.1	1699852	1699918	10.1298	5.77195	-	NC_005835.1	1699693	1700236	TT_RS09115	-
NC_005835.1	546970	547011	9.74004	5.77194	+	NC_005835.1	546151	547651	TT_RS02845	+
NC_005835.1	484586	484597	13.541	5.77064	+	NC_005835.1	484550	484823	TT_RS02525	+
NC_005835.1	148265	148313	13.2701	5.77064	+	NC_005835.1	147247	148465	TT_RS00845	+
NC_005835.1	1076495	1076572	9.50452	5.76986	+	NC_005835.1	1076434	1077046	TT_RS05585	+
NC_005835.1	347498	347598	19.1328	5.7694	-	NC_005835.1	347335	348601	TT_RS01830	-
NC_005835.1	1415189	1415287	28.5008	5.76936	+	NC_005835.1	1414440	1415736	TT_RS07525	+
NC_005835.1	80854	80906	16.2018	5.76934	+	NC_005835.1	80753	81164	TT_RS00450	+
NC_005835.1	1694647	1694739	13.131	5.76933	-	NC_005835.1	1694279	1695827	TT_RS09090	-
NC_005835.1	31405	31468	10.4991	5.76933	-	NC_005835.1	30935	32792	TT_RS00170	-
NC_005835.1	1689316	1689372	10.4991	5.76933	+	NC_005835.1	1688479	1689619	TT_RS09070	+
NC_005835.1	839975	840093	17.8872	5.76755	-	NC_005835.1	839817	840831	TT_RS04370	-
NC_005838.1	57971	58012	43.2576	5.76719	-	NC_005838.1	57604	58294	TT_RS10455	-
NC_005835.1	795302	795341	17.1638	5.76496	-	NC_005835.1	794868	796173	TT_RS04105	-
NC_005835.1	1193660	1193704	15.5399	5.76407	-	NC_005835.1	1191942	1193901	TT_RS06215	-
NC_005835.1	45104	45159	13.025	5.76407	-	NC_005835.1	44351	45269	TT_RS00235	-
NC_005835.1	1166688	1166718	9.76313	5.76406	-	NC_005835.1	1165960	1166779	TT_RS06080	-
NC_005835.1	1709899	1709924	9.76313	5.76406	+	NC_005835.1	1709501	1710764	TT_RS09165	+
NC_005835.1	1665263	1665341	19.2202	5.76143	-	NC_005835.1	1664233	1665589	TT_RS08925	-
NC_005835.1	1651206	1651245	13.9282	5.76142	+	NC_005835.1	1651177	1651342	TT_RS08825	+
NC_005835.1	92999	93069	9.32429	5.76141	+	NC_005835.1	92911	94039	TT_RS00520	+
NC_005835.1	804899	804944	9.32429	5.76141	-	NC_005835.1	804867	804993	TT_RS04160	-
NC_005835.1	1038465	1038497	9.32429	5.76141	-	NC_005835.1	1038449	1039264	TT_RS05400	-
NC_005835.1	1161646	1161736	9.32429	5.76141	+	NC_005835.1	1160905	1162333	TT_RS06055	+
NC_005838.1	95254	95295	9.32429	5.76141	+	NC_005838.1	95199	95604	TT_RS10650	+
NC_005835.1	1047610	1047648	9.28887	5.76141	-	NC_005835.1	1046977	1048309	TT_RS05440	-
NC_005835.1	28213	28325	20.7228	5.75999	-	NC_005835.1	27402	28413	TT_RS00145	-
NC_005835.1	1452237	1452342	11.8988	5.75934	-	NC_005835.1	1452219	1454220	TT_RS07720	-
NC_005835.1	722208	722307	16.8869	5.75766	-	NC_005835.1	721655	722517	TT_RS03740	-
NC_005835.1	1292821	1292883	16.7064	5.7561	+	NC_005835.1	1291242	1293639	TT_RS06855	+
NC_005835.1	951308	951410	14.8263	5.7561	+	NC_005835.1	950909	951689	TT_RS04895	+
NC_005838.1	99656	99736	14.6439	5.7561	+	NC_005838.1	98387	99782	TT_RS10670	+
NC_005835.1	22290	22366	11.5731	5.75609	-	NC_005835.1	22217	22901	TT_RS00125	-
NC_005835.1	900962	901054	11.5731	5.75609	-	NC_005835.1	899917	901411	TT_RS04655	-
NC_005835.1	161529	161589	10.8712	5.75609	+	NC_005835.1	161449	161761	TT_RS00910	+
NC_005835.1	910149	910177	10.8712	5.75609	+	NC_005835.1	909730	911050	TT_RS04700	+
NC_005835.1	719481	719526	9.3611	5.75609	+	NC_005835.1	719203	720694	TT_RS03730	+
NC_005835.1	683075	683126	17.7256	5.75477	-	NC_005835.1	682700	683285	TT_RS03550	-
NC_005835.1	1798831	1798961	17.7256	5.75477	+	NC_005835.1	1797681	1799439	TT_RS09615	+
NC_005835.1	1199572	1199619	16.1236	5.75164	+	NC_005835.1	1199546	1199930	TT_RS06250	+
NC_005835.1	1097863	1097972	19.4452	5.75114	+	NC_005835.1	1096219	1098094	TT_RS05700	+
NC_005835.1	938545	938672	10.0998	5.74962	-	NC_005835.1	937413	939051	TT_RS04845	-
NC_005835.1	1533717	1533756	43.8722	5.7474	-	NC_005835.1	1533350	1534040	TT_RS08175	-
NC_005835.1	1816267	1816310	15.5286	5.74714	-	NC_005835.1	1815073	1816357	TT_RS09710	-
NC_005835.1	678783	678849	15.6916	5.74669	-	NC_005835.1	677891	679244	TT_RS03535	-
NC_005835.1	1884304	1884387	22.4739	5.74536	+	NC_005835.1	1884077	1885400	TT_RS10075	+
NC_005835.1	778501	778604	9.88443	5.74534	+	NC_005835.1	777929	778664	TT_RS04025	+
NC_005835.1	1112694	1112750	12.9787	5.74533	-	NC_005835.1	1112294	1112975	TT_RS05775	-
NC_005835.1	231102	231165	9.3993	5.74532	-	NC_005835.1	229653	231204	TT_RS01230	-
NC_005835.1	248420	248458	9.3993	5.74532	+	NC_005835.1	248178	248646	TT_RS01310	+
NC_005835.1	538955	538974	9.3993	5.74532	+	NC_005835.1	538448	540683	TT_RS02805	+
NC_005835.1	696499	696551	9.3993	5.74532	+	NC_005835.1	696127	696562	TT_RS03610	+
NC_005835.1	1117973	1118011	9.3993	5.74532	+	NC_005835.1	1117585	1118275	TT_RS05815	+
NC_005835.1	1812116	1812198	14.8173	5.74293	-	NC_005835.1	1810778	1812227	TT_RS09695	-
NC_005835.1	843074	843127	12.786	5.74125	+	NC_005835.1	842587	843193	TT_RS04385	+
NC_005835.1	20153	20291	12.5495	5.74051	+	NC_005835.1	19891	21529	TT_RS00110	+
NC_005835.1	172862	172959	18.0457	5.73989	-	NC_005835.1	172515	174984	TT_RS00980	-
NC_005835.1	1861609	1861657	12.8134	5.73989	-	NC_005835.1	1861230	1862085	TT_RS09950	-
NC_005835.1	1237445	1237488	12.7597	5.73989	-	NC_005835.1	1235684	1237919	TT_RS06470	-
NC_005835.1	1485109	1485158	10.1734	5.73988	+	NC_005835.1	1484283	1485525	TT_RS07910	+
NC_005835.1	1235845	1235881	9.80476	5.73988	-	NC_005835.1	1235684	1237919	TT_RS06470	-
NC_005835.1	1757080	1757117	9.80476	5.73988	+	NC_005835.1	1756530	1757424	TT_RS09415	+
NC_005835.1	1260498	1260531	9.71283	5.73988	-	NC_005835.1	1260495	1260681	TT_RS06635	-
NC_005835.1	1823218	1823340	15.2495	5.73886	-	NC_005835.1	1822038	1824390	TT_RS09745	-
NC_005835.1	994716	994751	39.1942	5.73582	+	NC_005835.1	994085	994964	TT_RS05140	+
NC_005835.1	1043884	1043937	14.4981	5.73578	+	NC_005835.1	1043080	1045939	TT_RS05430	+
NC_005835.1	1127943	1127983	12.8419	5.73578	+	NC_005835.1	1127601	1129188	TT_RS05865	+
NC_005835.1	1860538	1860627	8.97515	5.73386	+	NC_005835.1	1860376	1861261	TT_RS09945	+
NC_005835.1	863456	863551	14.8063	5.73032	-	NC_005835.1	863090	866084	TT_RS04490	-
NC_005835.1	781892	781961	16.1159	5.72888	+	NC_005835.1	781772	782480	TT_RS04055	+
NC_005835.1	1691154	1691210	15.3678	5.72888	+	NC_005835.1	1690781	1692266	TT_RS09080	+
NC_005835.1	1123379	1123413	12.8714	5.72887	+	NC_005835.1	1122100	1123492	TT_RS05840	+
NC_005835.1	51006	51061	12.6689	5.72887	-	NC_005835.1	50359	51076	TT_RS00270	-
NC_005835.1	1338503	1338541	10.5448	5.72887	-	NC_005835.1	1338060	1339332	TT_RS07125	-
NC_005835.1	1833449	1833499	10.5448	5.72887	-	NC_005835.1	1833237	1834032	TT_RS09815	-
NC_005835.1	982710	982761	9.43896	5.72887	-	NC_005835.1	982576	983380	TT_RS05065	-
NC_005835.1	1150054	1150111	9.43896	5.72887	+	NC_005835.1	1148639	1150411	TT_RS05980	+
NC_005835.1	1213582	1213631	9.43896	5.72887	+	NC_005835.1	1213244	1213937	TT_RS06355	+
NC_005835.1	1282154	1282222	9.43896	5.72887	+	NC_005835.1	1282105	1282897	TT_RS06805	+
NC_005835.1	531574	531638	16.8756	5.72795	-	NC_005835.1	531303	532458	TT_RS02760	-
NC_005835.1	619554	619586	14.6817	5.7261	+	NC_005835.1	619237	620206	TT_RS03210	+
NC_005835.1	703400	703439	14.6817	5.7261	+	NC_005835.1	703018	704087	TT_RS03650	+
NC_005835.1	489767	489805	11.9513	5.71769	-	NC_005835.1	489056	490160	TT_RS02555	-
NC_005835.1	693926	693994	11.9513	5.71769	-	NC_005835.1	693402	694020	TT_RS03590	-
NC_005835.1	550994	551056	9.00238	5.71768	-	NC_005835.1	550218	551493	TT_RS02860	-
NC_005835.1	611466	611517	9.00238	5.71768	+	NC_005835.1	611092	613345	TT_RS03180	+
NC_005835.1	749898	749970	9.00238	5.71768	+	NC_005835.1	749117	750806	TT_RS03905	+
NC_005835.1	1836043	1836071	9.00238	5.71768	-	NC_005835.1	1834736	1840145	TT_RS09825	-
NC_005835.1	48114	48265	19.8845	5.71678	-	NC_005835.1	47771	49658	TT_RS00260	-
NC_005835.1	910222	910265	13.9992	5.71487	+	NC_005835.1	909730	911050	TT_RS04700	+
NC_005838.1	45118	45178	13.9992	5.71487	+	NC_005838.1	44760	46254	TT_RS10380	+
NC_005835.1	132638	132692	13.2864	5.71487	+	NC_005835.1	132536	133853	TT_RS00765	+
NC_005835.1	1450340	1450437	13.2864	5.71487	-	NC_005835.1	1450104	1451169	TT_RS07710	-
NC_005835.1	460786	460810	9.03853	5.71486	-	NC_005835.1	460411	460813	TT_RS02395	-
NC_005835.1	547253	547280	9.03853	5.71486	+	NC_005835.1	546151	547651	TT_RS02845	+
NC_005835.1	1361288	1361323	8.96768	5.71486	-	NC_005835.1	1360864	1361464	TT_RS07260	-
NC_005835.1	1840928	1841019	16.7292	5.71404	+	NC_005835.1	1840329	1842804	TT_RS09830	+
NC_005835.1	27176	27234	16.2082	5.71014	-	NC_005835.1	26362	27406	TT_RS00140	-
NC_005835.1	1318562	1318609	12.4712	5.70918	-	NC_005835.1	1318194	1319340	TT_RS07025	-
NC_005835.1	92525	92558	9.84803	5.70918	+	NC_005835.1	92291	92918	TT_RS00515	+
NC_005835.1	390260	390344	9.84803	5.70918	+	NC_005835.1	389431	390418	TT_RS02040	+
NC_005835.1	529048	529079	9.84803	5.70918	-	NC_005835.1	527786	530813	TT_RS02750	-
NC_005835.1	802093	802117	9.84803	5.70918	-	NC_005835.1	801488	802223	TT_RS04140	-
NC_005835.1	95006	95087	12.6232	5.70715	+	NC_005835.1	94242	95208	TT_RS00530	+
NC_005835.1	381635	381781	24.1784	5.70712	+	NC_005835.1	380843	381872	TT_RS01985	+
NC_005835.1	995312	995366	35.1061	5.70685	+	NC_005835.1	994960	997234	TT_RS05145	+
NC_005835.1	1321147	1321216	12.9335	5.70633	+	NC_005835.1	1320413	1321601	TT_RS07035	+
NC_005835.1	1559538	1559583	12.5243	5.70633	+	NC_005835.1	1559342	1560587	TT_RS08310	+
NC_005835.1	1584810	1584858	12.4281	5.70633	-	NC_005835.1	1583322	1585698	TT_RS08480	-
NC_005835.1	1532730	1532787	9.48016	5.70632	-	NC_005835.1	1532629	1533292	TT_RS08170	-
NC_005835.1	1689388	1689445	9.48016	5.70632	+	NC_005835.1	1688479	1689619	TT_RS09070	+
NC_005835.1	129510	129547	9.07615	5.70632	+	NC_005835.1	129229	130960	TT_RS00750	+
NC_005835.1	1821968	1822013	9.07615	5.70632	-	NC_005835.1	1820944	1822042	TT_RS09740	-
NC_005835.1	1088874	1088913	8.93445	5.70632	-	NC_005835.1	1088283	1089468	TT_RS05665	-
NC_005835.1	1006799	1006925	14.0199	5.70382	+	NC_005835.1	1006390	1007269	TT_RS05200	+
NC_005835.1	1723191	1723307	9.05921	5.70345	-	NC_005835.1	1723104	1723890	TT_RS09225	-
NC_005835.1	1335498	1335562	17.3625	5.70283	-	NC_005835.1	1334866	1335818	TT_RS07105	-
NC_005835.1	899309	899374	15.127	5.70059	+	NC_005835.1	898050	899940	TT_RS04650	+
NC_005835.1	525616	525687	12.6072	5.70058	+	NC_005835.1	524790	525816	TT_RS02725	+
NC_005835.1	1872295	1872344	12.6072	5.70058	-	NC_005835.1	1872193	1872440	TT_RS11465	-
NC_005835.1	396587	396665	9.68741	5.70057	-	NC_005835.1	396020	397286	TT_RS02070	-
NC_005835.1	886750	886772	28.9803	5.6974	-	NC_005835.1	886375	887047	TT_RS04580	-
NC_005835.1	1804521	1804535	39.9025	5.69711	-	NC_005835.1	1804493	1804570	TT_RS09645	-
NC_005835.1	1538810	1538868	19.092	5.69334	-	NC_005835.1	1538332	1539334	TT_RS08200	-
NC_005835.1	1726517	1726548	18.5278	5.69334	-	NC_005835.1	1726079	1726574	TT_RS09245	-
NC_005838.1	91431	91472	16.4247	5.69334	-	NC_005838.1	91070	92104	TT_RS11505	-
NC_005835.1	301132	301163	49.4985	5.6929	-	NC_005835.1	299799	301557	TT_RS01595	-
NC_005835.1	571763	571837	12.5831	5.69187	+	NC_005835.1	571561	572341	TT_RS02990	+
NC_005835.1	812896	812931	12.5831	5.69187	-	NC_005835.1	812865	813138	TT_RS04210	-
NC_005835.1	100150	100183	9.11528	5.69187	+	NC_005835.1	99924	100629	TT_RS00565	+
NC_005835.1	1707595	1707646	9.11528	5.69187	+	NC_005835.1	1706774	1709492	TT_RS09160	+
NC_005835.1	436994	437034	8.90273	5.69186	-	NC_005835.1	436061	437096	TT_RS02270	-
NC_005835.1	1641081	1641171	8.90273	5.69186	-	NC_005835.1	1640385	1641591	TT_RS08750	-
NC_005835.1	150219	150252	15.8904	5.6909	-	NC_005835.1	150069	150936	TT_RS00860	-
NC_005835.1	1305005	1305057	15.4087	5.68895	+	NC_005835.1	1304657	1305074	TT_RS06935	+
NC_005835.1	466546	466631	24.5487	5.68603	-	NC_005835.1	465263	466883	TT_RS02420	-
NC_005835.1	484893	484938	21.0634	5.68602	+	NC_005835.1	484819	486016	TT_RS02530	+
NC_005835.1	1285194	1285223	14.226	5.68601	+	NC_005835.1	1285062	1286131	TT_RS06830	+
NC_005835.1	1251236	1251343	9.02122	5.68386	-	NC_005835.1	1250741	1251575	TT_RS06545	-
NC_005835.1	494149	494203	12.6142	5.68009	-	NC_005835.1	494001	495300	TT_RS02590	-
NC_005835.1	430151	430192	10.5925	5.68009	+	NC_005835.1	429959	431315	TT_RS02245	+
NC_005835.1	494063	494129	10.5925	5.68009	-	NC_005835.1	494001	495300	TT_RS02590	-
NC_005835.1	589027	589092	56.9696	5.67966	-	NC_005835.1	588788	589301	TT_RS03070	-
NC_005835.1	797757	797824	19.9778	5.67912	-	NC_005835.1	797075	797921	TT_RS04115	-
NC_005838.1	101727	101752	14.7909	5.67911	+	NC_005838.1	101656	103567	TT_RS10680	+
NC_005838.1	96880	96927	12.1802	5.67712	+	NC_005838.1	96350	97226	TT_RS10660	+
NC_005835.1	134169	134198	9.52302	5.67711	+	NC_005835.1	133849	135271	TT_RS00770	+
NC_005835.1	1003001	1003049	9.52302	5.67711	+	NC_005835.1	1002875	1004171	TT_RS05185	+
NC_005835.1	1675490	1675536	9.52302	5.67711	-	NC_005835.1	1674836	1675544	TT_RS08990	-
NC_005835.1	1767798	1767855	9.13335	5.67711	-	NC_005835.1	1767169	1767877	TT_RS09475	-
NC_005835.1	1665046	1665105	18.5548	5.67564	-	NC_005835.1	1664233	1665589	TT_RS08925	-
NC_005835.1	742107	742204	31.7552	5.67355	-	NC_005835.1	741843	742341	TT_RS03850	-
NC_005835.1	957942	957993	17.2378	5.67264	-	NC_005835.1	957042	958215	TT_RS04925	-
NC_005835.1	144507	144546	16.269	5.67114	-	NC_005835.1	143878	144706	TT_RS00830	-
NC_005835.1	1528251	1528301	13.1332	5.67113	+	NC_005835.1	1527076	1528501	TT_RS08145	+
NC_005835.1	1543244	1543287	12.9999	5.67113	-	NC_005835.1	1541857	1544527	TT_RS08215	-
NC_005835.1	1073742	1073789	11.2965	5.67113	+	NC_005835.1	1071778	1076257	TT_RS05580	+
NC_005835.1	1491779	1491814	9.89309	5.67113	-	NC_005835.1	1490965	1492006	TT_RS07950	-
NC_005835.1	1672587	1672631	9.89309	5.67113	-	NC_005835.1	1672306	1673533	TT_RS08975	-
NC_005835.1	552708	552825	9.39715	5.67113	-	NC_005835.1	552647	553182	TT_RS02875	-
NC_005835.1	250649	250686	9.156	5.67113	+	NC_005835.1	250324	252901	TT_RS01330	+
NC_005835.1	696914	696955	9.156	5.67113	+	NC_005835.1	696558	697416	TT_RS03615	+
NC_005835.1	896036	896083	9.156	5.67113	+	NC_005835.1	896015	896225	TT_RS04630	+
NC_005835.1	1156555	1156634	9.156	5.67113	+	NC_005835.1	1155938	1157600	TT_RS06025	+
NC_005835.1	1272214	1272276	9.156	5.67113	+	NC_005835.1	1271388	1272513	TT_RS06730	+
NC_005835.1	422273	422323	8.71661	5.67113	-	NC_005835.1	421446	422841	TT_RS02195	-
NC_005835.1	928695	928755	8.71661	5.67113	+	NC_005835.1	928584	929697	TT_RS04800	+
NC_005835.1	1441236	1441261	8.71661	5.67113	-	NC_005835.1	1440779	1441445	TT_RS07655	-
NC_005835.1	7746	7806	8.68119	5.67113	+	NC_005835.1	7548	8745	TT_RS00045	+
NC_005835.1	249586	249626	8.68119	5.67113	+	NC_005835.1	249569	250328	TT_RS01325	+
NC_005835.1	674800	674868	8.68119	5.67113	+	NC_005835.1	673650	674964	TT_RS03515	+
NC_005835.1	1539765	1539816	17.19	5.66888	-	NC_005835.1	1539339	1540749	TT_RS08205	-
NC_005835.1	972881	972903	12.7543	5.6651	+	NC_005835.1	971722	974140	TT_RS05000	+
NC_005835.1	689997	690108	12.3328	5.6651	+	NC_005835.1	686996	690128	TT_RS03570	+
NC_005835.1	786030	786072	8.75358	5.66509	-	NC_005835.1	785300	787889	TT_RS04075	-
NC_005835.1	42082	42123	8.64731	5.66509	-	NC_005835.1	42000	43227	TT_RS00220	-
NC_005835.1	487949	487999	8.64731	5.66509	-	NC_005835.1	487418	488048	TT_RS02545	-
NC_005838.1	171606	171653	8.64731	5.66509	+	NC_005838.1	171483	172249	TT_RS10975	+
NC_005835.1	725262	725353	14.861	5.66409	-	NC_005835.1	725006	725408	TT_RS03760	-
NC_005835.1	551273	551366	8.79649	5.66384	-	NC_005835.1	550218	551493	TT_RS02860	-
NC_005838.1	160571	160610	44.9034	5.66213	+	NC_005838.1	160288	160978	TT_RS10910	+
NC_005835.1	785354	785440	11.5007	5.65618	-	NC_005835.1	785300	787889	TT_RS04075	-
NC_005835.1	283629	283694	21.0555	5.65494	+	NC_005835.1	283460	284513	TT_RS01505	+
NC_005835.1	1531881	1531918	12.084	5.65287	-	NC_005835.1	1530085	1531933	TT_RS08160	-
NC_005835.1	47340	47385	10.2662	5.65287	-	NC_005835.1	47268	47748	TT_RS00255	-
NC_005838.1	2904	2959	10.2662	5.65287	-	NC_005838.1	2758	3478	TT_RS10155	-
NC_005835.1	763050	763117	8.61501	5.65286	+	NC_005835.1	762501	763734	TT_RS03950	+
NC_005835.1	783256	783405	14.4027	5.65264	+	NC_005835.1	782781	784782	TT_RS04065	+
NC_005835.1	723828	723961	22.925	5.65083	-	NC_005835.1	723101	724124	TT_RS03750	-
NC_005838.1	50908	50973	14.6178	5.64668	-	NC_005838.1	50684	51542	TT_RS10420	-
NC_005835.1	1539918	1539941	12.6797	5.64668	-	NC_005835.1	1539339	1540749	TT_RS08205	-
NC_005835.1	26109	26156	10.9694	5.64668	-	NC_005835.1	23891	26366	TT_RS00135	-
NC_005835.1	1144578	1144663	50.1909	5.64448	+	NC_005835.1	1144119	1145643	TT_RS11410	+
NC_005835.1	1383981	1384022	18.1184	5.64357	-	NC_005835.1	1382491	1385851	TT_RS07385	-
NC_005835.1	1842583	1842624	11.8911	5.64356	+	NC_005835.1	1840329	1842804	TT_RS09830	+
NC_005835.1	925146	925185	9.19842	5.64356	+	NC_005835.1	925128	926228	TT_RS04785	+
NC_005835.1	1089127	1089163	9.19842	5.64356	-	NC_005835.1	1088283	1089468	TT_RS05665	-
NC_005835.1	1184146	1184240	9.19842	5.64356	+	NC_005835.1	1183033	1184248	TT_RS06165	+
NC_005835.1	1518913	1518943	9.19842	5.64356	-	NC_005835.1	1518888	1519698	TT_RS08110	-
NC_005835.1	754222	754254	11.9186	5.64043	+	NC_005835.1	752876	755018	TT_RS03925	+
NC_005835.1	888515	888540	11.9186	5.64043	-	NC_005835.1	888504	890241	TT_RS04590	-
NC_005835.1	1772444	1772485	11.9186	5.64043	-	NC_005835.1	1772360	1772549	TT_RS09515	-
NC_005835.1	529986	530015	9.56771	5.64043	-	NC_005835.1	527786	530813	TT_RS02750	-
NC_005835.1	959193	959230	9.56771	5.64043	-	NC_005835.1	958215	960018	TT_RS04930	-
NC_005835.1	1430962	1431049	9.56771	5.64043	+	NC_005835.1	1430818	1431742	TT_RS07595	+
NC_005838.1	16013	16058	9.56771	5.64043	+	NC_005838.1	15951	16371	TT_RS10235	+
NC_005835.1	1622877	1622933	9.10723	5.64043	-	NC_005835.1	1622498	1623434	TT_RS08670	-
NC_005835.1	933754	933844	10.3932	5.6394	+	NC_005835.1	932962	933946	TT_RS04815	+
NC_005835.1	1824624	1824660	12.3271	5.63886	-	NC_005835.1	1824391	1825708	TT_RS09750	-
NC_005835.1	1804551	1804563	42.7856	5.63628	-	NC_005835.1	1804493	1804570	TT_RS09645	-
NC_005835.1	1086735	1086809	18.0062	5.63625	-	NC_005835.1	1086635	1087070	TT_RS05650	-
NC_005835.1	1222716	1222762	17.3858	5.63414	-	NC_005835.1	1221705	1222882	TT_RS06405	-
NC_005835.1	874675	874731	11.8158	5.63413	+	NC_005835.1	872126	874742	TT_RS04530	+
NC_005835.1	874675	874731	11.8158	5.63413	+	NC_005835.1	874714	876487	TT_RS04535	+
NC_005835.1	148763	148795	8.83231	5.63413	+	NC_005835.1	148464	148926	TT_RS00850	+
NC_005835.1	1297113	1297160	8.83231	5.63413	+	NC_005835.1	1297045	1297297	TT_RS06885	+
NC_005835.1	1866230	1866252	8.83231	5.63413	+	NC_005835.1	1865578	1866871	TT_RS09980	+
NC_005835.1	227914	228014	13.7524	5.63255	-	NC_005835.1	227200	228058	TT_RS01215	-
NC_005835.1	456572	456667	11.9772	5.62458	-	NC_005835.1	456395	457130	TT_RS02375	-
NC_005835.1	14222	14289	9.94019	5.62457	+	NC_005835.1	13869	14346	TT_RS00070	+
NC_005835.1	251565	251602	9.94019	5.62457	+	NC_005835.1	250324	252901	TT_RS01330	+
NC_005835.1	333216	333246	8.39542	5.62457	-	NC_005835.1	332905	334621	TT_RS01765	-
NC_005835.1	460623	460654	8.39542	5.62457	-	NC_005835.1	460411	460813	TT_RS02395	-
NC_005835.1	462867	462892	8.39542	5.62457	-	NC_005835.1	460855	463459	TT_RS02400	-
NC_005835.1	465955	465988	8.39542	5.62457	-	NC_005835.1	465263	466883	TT_RS02420	-
NC_005835.1	1135222	1135259	8.39542	5.62457	-	NC_005835.1	1133651	1135364	TT_RS05900	-
NC_005835.1	1487302	1487370	12.9252	5.623	-	NC_005835.1	1486970	1488233	TT_RS07925	-
NC_005835.1	1321231	1321307	8.66302	5.623	+	NC_005835.1	1320413	1321601	TT_RS07035	+
NC_005835.1	1228260	1228337	21.0098	5.62138	+	NC_005835.1	1227634	1228567	TT_RS06430	+
NC_005835.1	905357	905377	13.071	5.62137	-	NC_005835.1	905328	906447	TT_RS04670	-
NC_005835.1	772588	772697	10.6426	5.62136	-	NC_005835.1	771675	773049	TT_RS03995	-
NC_005835.1	429647	429703	8.43166	5.62136	+	NC_005835.1	429477	429945	TT_RS02240	+
NC_005835.1	576549	576611	8.43166	5.62136	+	NC_005835.1	575466	577014	TT_RS03010	+
NC_005835.1	816031	816069	8.43166	5.62136	-	NC_005835.1	815656	816694	TT_RS04230	-
NC_005835.1	1806403	1806439	8.43166	5.62136	+	NC_005835.1	1804669	1806625	TT_RS09650	+
NC_005835.1	1527237	1527277	8.36082	5.62136	+	NC_005835.1	1527076	1528501	TT_RS08145	+
NC_005835.1	1562491	1562541	8.36082	5.62136	-	NC_005835.1	1562220	1562913	TT_RS08325	-
NC_005838.1	207849	207925	16.6217	5.61734	-	NC_005838.1	207698	209327	TT_RS11160	-
NC_005835.1	1608733	1608810	14.1147	5.6149	+	NC_005835.1	1608515	1609265	TT_RS08605	+
NC_005835.1	1827628	1827695	19.9897	5.61165	-	NC_005835.1	1827486	1828110	TT_RS09765	-
NC_005835.1	1521098	1521149	12.0083	5.61164	-	NC_005835.1	1520424	1521174	TT_RS08120	-
NC_005835.1	37265	37323	8.46955	5.61163	+	NC_005835.1	37098	38025	TT_RS00195	+
NC_005835.1	460718	460750	8.46955	5.61163	-	NC_005835.1	460411	460813	TT_RS02395	-
NC_005835.1	910825	910848	8.46955	5.61163	+	NC_005835.1	909730	911050	TT_RS04700	+
NC_005835.1	1113181	1113227	8.46955	5.61163	-	NC_005835.1	1112946	1113312	TT_RS05780	-
NC_005835.1	967887	967943	8.32788	5.61163	-	NC_005835.1	967411	968254	TT_RS04975	-
NC_005835.1	1056386	1056444	8.32788	5.61163	+	NC_005835.1	1056066	1057335	TT_RS05490	+
NC_005835.1	1864786	1864840	8.32788	5.61163	+	NC_005835.1	1864359	1865517	TT_RS09975	+
NC_005835.1	1407160	1407214	11.5756	5.61	+	NC_005835.1	1406535	1407867	TT_RS07500	+
NC_005835.1	1755666	1755737	15.8196	5.60837	+	NC_005835.1	1754654	1755782	TT_RS09405	+
NC_005835.1	504110	504177	14.8031	5.60837	-	NC_005835.1	503268	504534	TT_RS02635	-
NC_005835.1	850415	850477	14.399	5.60837	-	NC_005835.1	849945	850806	TT_RS04430	-
NC_005835.1	823531	823572	9.24271	5.60836	-	NC_005835.1	823186	824761	TT_RS04280	-
NC_005835.1	827752	827789	9.24271	5.60836	-	NC_005835.1	826927	827941	TT_RS04295	-
NC_005835.1	967748	967792	9.24271	5.60836	-	NC_005835.1	967411	968254	TT_RS04975	-
NC_005835.1	1517620	1517681	9.24271	5.60836	+	NC_005835.1	1516867	1518901	TT_RS08105	+
NC_005838.1	64860	64934	9.24271	5.60836	-	NC_005838.1	64187	65237	TT_RS10495	-
NC_005835.1	12835	12880	8.87425	5.60836	+	NC_005835.1	11298	13161	TT_RS00060	+
NC_005835.1	142073	142110	8.87425	5.60836	-	NC_005835.1	141649	142534	TT_RS00810	-
NC_005835.1	296211	296233	8.87425	5.60836	-	NC_005835.1	295216	296266	TT_RS01565	-
NC_005835.1	1395898	1395960	8.87425	5.60836	+	NC_005835.1	1395244	1396363	TT_RS07440	+
NC_005835.1	1727973	1728049	8.81767	5.60836	+	NC_005835.1	1727938	1728421	TT_RS09260	+
NC_005838.1	105609	105694	8.81767	5.60836	-	NC_005838.1	104751	105717	TT_RS10695	-
NC_005835.1	582605	582671	8.55548	5.60836	+	NC_005835.1	582112	583870	TT_RS11380	+
NC_005835.1	1744655	1744709	38.1809	5.60549	+	NC_005835.1	1744601	1744952	TT_RS09340	+
NC_005835.1	1434485	1434559	15.2733	5.6051	-	NC_005835.1	1434053	1434776	TT_RS07620	-
NC_005835.1	1080728	1080769	11.4988	5.60343	-	NC_005835.1	1080082	1081243	TT_RS05600	-
NC_005835.1	1655028	1655054	20.6177	5.60014	+	NC_005835.1	1654891	1655338	TT_RS08870	+
NC_005835.1	166038	166099	14.2823	5.59847	+	NC_005835.1	166004	166475	TT_RS00945	+
NC_005835.1	1398160	1398212	14.4549	5.59847	-	NC_005835.1	1397505	1398219	TT_RS07450	-
NC_005835.1	1346687	1346710	16.7399	5.59514	-	NC_005835.1	1345789	1347040	TT_RS07175	-
NC_005835.1	1504529	1504570	10.316	5.59513	+	NC_005835.1	1504482	1504950	TT_RS08040	+
NC_005835.1	10794	10839	8.50916	5.59512	+	NC_005835.1	9983	11237	TT_RS00055	+
NC_005835.1	802578	802609	8.50916	5.59512	-	NC_005835.1	802233	804321	TT_RS04145	-
NC_005835.1	1505777	1505839	8.50916	5.59512	+	NC_005835.1	1504999	1506853	TT_RS08045	+
NC_005835.1	1603064	1603120	8.50916	5.59512	+	NC_005835.1	1602537	1604115	TT_RS08560	+
NC_005835.1	1159736	1159792	54.3824	5.59268	-	NC_005835.1	1158713	1159904	TT_RS06040	-
NC_005835.1	308750	308820	16.3673	5.59179	-	NC_005835.1	308368	308995	TT_RS01640	-
NC_005835.1	1638740	1638778	16.3673	5.59179	-	NC_005835.1	1638394	1639567	TT_RS08740	-
NC_005835.1	910558	910607	14.4794	5.59011	+	NC_005835.1	909730	911050	TT_RS04700	+
NC_005835.1	1072947	1073008	14.3085	5.58617	+	NC_005835.1	1071778	1076257	TT_RS05580	+
NC_005835.1	1365824	1365885	27.7811	5.58574	+	NC_005835.1	1365271	1366492	TT_RS07300	+
NC_005835.1	1477394	1477418	89.8971	5.58346	-	NC_005835.1	1477361	1477436	TT_RS07855	-
NC_005835.1	1088151	1088183	11.6901	5.58335	-	NC_005835.1	1087854	1088268	TT_RS05660	-
NC_005835.1	1174137	1174172	11.4818	5.58335	-	NC_005835.1	1172919	1174194	TT_RS06120	-
NC_005835.1	1494887	1494955	11.4168	5.58335	-	NC_005835.1	1494279	1495443	TT_RS07965	-
NC_005835.1	1457071	1457121	71.8	5.57696	-	NC_005835.1	1454320	1457167	TT_RS07725	-
NC_005835.1	11079	11128	8.91811	5.5748	+	NC_005835.1	9983	11237	TT_RS00055	+
NC_005835.1	1376592	1376623	8.91811	5.5748	-	NC_005835.1	1376155	1377016	TT_RS07365	-
NC_005835.1	1397157	1397191	8.91811	5.5748	-	NC_005835.1	1396411	1397497	TT_RS07445	-
NC_005835.1	1665914	1665927	8.91811	5.5748	-	NC_005835.1	1665841	1666045	TT_RS08930	-
NC_005838.1	178596	178673	8.91811	5.5748	-	NC_005838.1	178105	179011	TT_RS11010	-
NC_005835.1	1832354	1832399	8.52851	5.5748	+	NC_005835.1	1832203	1832440	TT_RS09805	+
NC_005835.1	345720	345765	8.11047	5.5748	-	NC_005835.1	345568	347311	TT_RS01825	-
NC_005835.1	348803	348842	8.11047	5.5748	+	NC_005835.1	348645	348963	TT_RS01835	+
NC_005835.1	1154525	1154562	8.07506	5.5748	+	NC_005835.1	1154158	1154725	TT_RS06005	+
NC_005835.1	1660890	1660941	8.07506	5.5748	+	NC_005835.1	1660593	1661925	TT_RS08905	+
NC_005835.1	1884030	1884069	8.07506	5.5748	+	NC_005835.1	1883704	1884076	TT_RS10070	+
NC_005835.1	1559592	1559648	15.0274	5.57367	+	NC_005835.1	1559342	1560587	TT_RS08310	+
NC_005835.1	892513	892543	15.5412	5.57224	-	NC_005835.1	892485	894444	TT_RS04615	-
NC_005835.1	538701	538814	30.4868	5.57178	+	NC_005835.1	538448	540683	TT_RS02805	+
NC_005835.1	1486212	1486279	11.3141	5.57137	+	NC_005835.1	1486083	1486881	TT_RS07920	+
NC_005835.1	1322163	1322188	8.55057	5.57136	+	NC_005835.1	1322016	1323102	TT_RS07050	+
NC_005835.1	1603526	1603568	8.55057	5.57136	+	NC_005835.1	1602537	1604115	TT_RS08560	+
NC_005835.1	1714463	1714527	8.55057	5.57136	+	NC_005835.1	1712093	1718297	TT_RS09185	+
NC_005835.1	1768901	1768965	8.26723	5.57136	-	NC_005835.1	1768382	1769267	TT_RS09485	-
NC_005835.1	1078722	1078869	10.9528	5.5685	+	NC_005835.1	1078485	1080093	TT_RS05595	+
NC_005835.1	1490002	1490022	11.7218	5.56791	-	NC_005835.1	1489376	1490108	TT_RS07940	-
NC_005835.1	726481	726549	8.14764	5.5679	-	NC_005835.1	725404	726838	TT_RS03765	-
NC_005835.1	1350741	1350793	8.14764	5.5679	+	NC_005835.1	1349895	1351359	TT_RS07210	+
NC_005835.1	1828715	1828739	8.14764	5.5679	-	NC_005835.1	1828649	1829009	TT_RS09775	-
NC_005835.1	1873413	1873457	8.14764	5.5679	-	NC_005835.1	1872516	1873641	TT_RS10015	-
NC_005835.1	824699	824739	8.04139	5.5679	-	NC_005835.1	823186	824761	TT_RS04280	-
NC_005835.1	1340811	1340845	8.04139	5.5679	-	NC_005835.1	1339937	1340855	TT_RS07135	-
NC_005835.1	1747496	1747542	8.04139	5.5679	+	NC_005835.1	1747297	1747690	TT_RS09360	+
NC_005835.1	982619	982676	11.4005	5.56443	-	NC_005835.1	982576	983380	TT_RS05065	-
NC_005835.1	1778436	1778454	106.827	5.55593	+	NC_005835.1	1778424	1778501	TT_RS09550	+
NC_005835.1	1638833	1638887	24.8533	5.55392	-	NC_005835.1	1638394	1639567	TT_RS08740	-
NC_005835.1	261410	261478	16.0953	5.55391	-	NC_005835.1	261253	262882	TT_RS01410	-
NC_005835.1	243125	243142	8.18659	5.55389	+	NC_005835.1	241631	245189	TT_RS01290	+
NC_005835.1	502262	502295	8.18659	5.55389	-	NC_005835.1	502168	503278	TT_RS02630	-
NC_005835.1	526807	526852	8.18659	5.55389	+	NC_005835.1	526488	527175	TT_RS02735	+
NC_005835.1	1756137	1756164	8.18659	5.55389	+	NC_005835.1	1755862	1756534	TT_RS09410	+
NC_005835.1	1772642	1772660	8.18659	5.55389	-	NC_005835.1	1772538	1773495	TT_RS09520	-
NC_005835.1	738768	738801	8.00951	5.55389	-	NC_005835.1	738433	738889	TT_RS03825	-
NC_005835.1	205136	205303	11.843	5.55282	-	NC_005835.1	204863	205613	TT_RS01105	-
NC_005835.1	257903	257992	10.6953	5.55035	+	NC_005835.1	257647	259042	TT_RS01385	+
NC_005835.1	940286	940382	10.6953	5.55035	-	NC_005835.1	939047	941474	TT_RS04850	-
NC_005835.1	1441641	1441702	20.0329	5.54966	-	NC_005835.1	1441441	1442134	TT_RS07660	-
NC_005835.1	147956	147979	11.7548	5.54858	+	NC_005835.1	147247	148465	TT_RS00845	+
NC_005835.1	1013406	1013468	12.4659	5.54501	-	NC_005835.1	1012701	1014633	TT_RS05250	-
NC_005835.1	1585835	1585913	8.83872	5.5429	-	NC_005835.1	1585710	1586724	TT_RS08485	-
NC_005835.1	689245	689343	8.54583	5.54289	+	NC_005835.1	686996	690128	TT_RS03570	+
NC_005835.1	537933	537986	20.133	5.53963	+	NC_005835.1	537202	538447	TT_RS02800	+
NC_005835.1	1223017	1223047	10.9722	5.53961	-	NC_005835.1	1222891	1223902	TT_RS06410	-
NC_005835.1	171094	171147	9.66361	5.53961	+	NC_005835.1	170972	172163	TT_RS00970	+
NC_005838.1	19304	19342	9.66361	5.53961	+	NC_005838.1	17887	19906	TT_RS10255	+
NC_005835.1	1703281	1703374	8.59394	5.53961	+	NC_005835.1	1703251	1703608	TT_RS09135	+
NC_005835.1	1833955	1833990	8.59394	5.53961	-	NC_005835.1	1833237	1834032	TT_RS09815	-
NC_005835.1	879034	879113	8.23979	5.53961	-	NC_005835.1	878967	879822	TT_RS04550	-
NC_005835.1	515204	515256	10.9472	5.53781	+	NC_005835.1	514875	517812	TT_RS02700	+
NC_005835.1	843944	843994	16.759	5.53722	+	NC_005835.1	843189	844227	TT_RS04390	+
NC_005835.1	712780	712840	14.3931	5.53358	-	NC_005835.1	712410	712923	TT_RS03700	-
NC_005835.1	1811740	1811806	15.541	5.53237	-	NC_005835.1	1810778	1812227	TT_RS09695	-
NC_005835.1	1504806	1504842	11.0264	5.53236	+	NC_005835.1	1504482	1504950	TT_RS08040	+
NC_005835.1	56282	56371	8.22742	5.53236	-	NC_005835.1	55816	56737	TT_RS00310	-
NC_005835.1	349751	349787	8.22742	5.53236	-	NC_005835.1	349417	350437	TT_RS01840	-
NC_005835.1	421489	421529	8.22742	5.53236	-	NC_005835.1	421446	422841	TT_RS02195	-
NC_005835.1	579996	580070	8.22742	5.53236	+	NC_005835.1	579962	581135	TT_RS03030	+
NC_005835.1	1039405	1039435	8.22742	5.53236	-	NC_005835.1	1039267	1039975	TT_RS05405	-
NC_005835.1	1492288	1492337	8.22742	5.53236	-	NC_005835.1	1492005	1493202	TT_RS07955	-
NC_005835.1	1546064	1546150	8.22742	5.53236	-	NC_005835.1	1545768	1546524	TT_RS08230	-
NC_005835.1	1848349	1848431	7.97952	5.53236	-	NC_005835.1	1848033	1848693	TT_RS09875	-
[truncated: 798 more rows]
