# Supplementary material
Source: HighWire-hosted journal article supplement (doi:10.1101/rna.075580.120)
Supplement: Supplemental_Table_3.xlsx [file Supplemental_Table_3.xlsx]

## Sheet: peaks under cold-shock cond.
peak_contig	peak_start	peak_end	l10p	l2fc	peak_strand	gene_contig	gene_start	gene_end	gene_name	gene_strand
NC_005835.1	1080925	1080986	47.8679	8.26818	-	NC_005835.1	1080082	1081243	TT_RS05600	-
NC_005835.1	1577621	1577662	46.154	7.98392	+	NC_005835.1	1576802	1577624	TT_RS08430	+
NC_005835.1	1577621	1577662	46.154	7.98392	+	NC_005835.1	1577604	1578831	TT_RS08435	+
NC_005835.1	340397	340477	120.998	7.90876	+	NC_005835.1	339637	341689	TT_RS01800	+
NC_005835.1	182603	182661	50.2362	7.86197	+	NC_005835.1	179497	187516	TT_RS01015	+
NC_005835.1	297236	297295	51.4884	7.78106	-	NC_005835.1	296983	297724	TT_RS01575	-
NC_005835.1	183655	183730	39.04	7.77154	+	NC_005835.1	179497	187516	TT_RS01015	+
NC_005835.1	279710	279785	32.6997	7.74651	-	NC_005835.1	279440	280474	TT_RS11330	-
NC_005835.1	342075	342108	33.2585	7.72643	+	NC_005835.1	341821	342397	TT_RS01805	+
NC_005838.1	9942	10087	59.3346	7.70404	+	NC_005838.1	9633	10377	TT_RS10195	+
NC_005835.1	341014	341063	91.755	7.67986	+	NC_005835.1	339637	341689	TT_RS01800	+
NC_005835.1	1606335	1606388	51.6195	7.61841	-	NC_005835.1	1605359	1606430	TT_RS08580	-
NC_005835.1	1497551	1497591	59.0977	7.61164	+	NC_005835.1	1497146	1497941	TT_RS07980	+
NC_005835.1	1335414	1335472	31.8719	7.61073	-	NC_005835.1	1334866	1335818	TT_RS07105	-
NC_005838.1	91339	91406	29.6568	7.60688	-	NC_005838.1	91070	92104	TT_RS11505	-
NC_005835.1	1727094	1727137	41.543	7.58379	-	NC_005835.1	1726570	1727140	TT_RS09250	-
NC_005835.1	438163	438215	41.0506	7.58202	-	NC_005835.1	438009	438546	TT_RS02280	-
NC_005835.1	589430	589474	28.7647	7.55668	-	NC_005835.1	589237	589984	TT_RS03075	-
NC_005835.1	184912	184983	46.2046	7.55302	+	NC_005835.1	179497	187516	TT_RS01015	+
NC_005835.1	180160	180240	54.3943	7.5281	+	NC_005835.1	179497	187516	TT_RS01015	+
NC_005835.1	590397	590480	49.0738	7.52602	-	NC_005835.1	589976	590504	TT_RS03080	-
NC_005835.1	1412698	1412740	31.4963	7.51258	+	NC_005835.1	1412232	1412985	TT_RS07515	+
NC_005835.1	1575087	1575116	34.8427	7.48923	+	NC_005835.1	1574486	1575296	TT_RS08415	+
NC_005835.1	1389603	1389740	71.6628	7.48519	-	NC_005835.1	1388165	1389890	TT_RS07405	-
NC_005835.1	341287	341366	89.991	7.48508	+	NC_005835.1	339637	341689	TT_RS01800	+
NC_005835.1	1287462	1287530	48.098	7.48469	+	NC_005835.1	1286127	1288344	TT_RS06835	+
NC_005835.1	182694	182768	47.5844	7.46459	+	NC_005835.1	179497	187516	TT_RS01015	+
NC_005835.1	1439225	1439343	46.6124	7.46249	-	NC_005835.1	1438772	1440752	TT_RS07650	-
NC_005835.1	182265	182310	28.0089	7.46193	+	NC_005835.1	179497	187516	TT_RS01015	+
NC_005835.1	340798	340835	77.533	7.41897	+	NC_005835.1	339637	341689	TT_RS01800	+
NC_005835.1	64204	64241	30.0955	7.41702	+	NC_005835.1	63182	64526	TT_RS00355	+
NC_005835.1	184189	184324	68.0609	7.399	+	NC_005835.1	179497	187516	TT_RS01015	+
NC_005835.1	1346226	1346283	42.5613	7.36356	-	NC_005835.1	1345789	1347040	TT_RS07175	-
NC_005835.1	588630	588682	37.7715	7.35468	-	NC_005835.1	586767	588774	TT_RS03065	-
NC_005835.1	1606397	1606427	52.1362	7.33766	-	NC_005835.1	1605359	1606430	TT_RS08580	-
NC_005835.1	903726	903778	25.1881	7.33428	-	NC_005835.1	902447	905348	TT_RS04665	-
NC_005835.1	1576471	1576558	107.961	7.28851	+	NC_005835.1	1575876	1576794	TT_RS08425	+
NC_005835.1	1386702	1386826	60.0314	7.28454	-	NC_005835.1	1386681	1387110	TT_RS07395	-
NC_005835.1	79007	79064	24.6718	7.26741	+	NC_005835.1	78118	79402	TT_RS00435	+
NC_005835.1	752574	752609	30.0736	7.23797	+	NC_005835.1	752545	752815	TT_RS03920	+
NC_005835.1	217067	217142	52.363	7.22501	-	NC_005835.1	216032	217478	TT_RS01160	-
NC_005835.1	1389903	1389973	65.3612	7.21153	-	NC_005835.1	1389890	1390913	TT_RS07410	-
NC_005835.1	1314312	1314341	37.9026	7.19675	-	NC_005835.1	1314283	1314661	TT_RS07000	-
NC_005835.1	178507	178567	25.7808	7.19064	+	NC_005835.1	177672	179184	TT_RS01005	+
NC_005835.1	1389269	1389308	29.0896	7.18451	-	NC_005835.1	1388165	1389890	TT_RS07405	-
NC_005835.1	338478	338551	21.8607	7.1845	+	NC_005835.1	338360	339254	TT_RS01790	+
NC_005835.1	1884286	1884389	36.4226	7.18375	+	NC_005835.1	1884077	1885400	TT_RS10075	+
NC_005835.1	1347193	1347222	31.889	7.17793	-	NC_005835.1	1347049	1347307	TT_RS07180	-
NC_005835.1	753802	753856	22.8899	7.17206	+	NC_005835.1	752876	755018	TT_RS03925	+
NC_005835.1	904992	905043	23.8144	7.17049	-	NC_005835.1	902447	905348	TT_RS04665	-
NC_005835.1	1577275	1577360	71.36	7.16001	+	NC_005835.1	1576802	1577624	TT_RS08430	+
NC_005835.1	556524	556598	30.0569	7.15782	+	NC_005835.1	555834	556868	TT_RS11370	+
NC_005835.1	708457	708502	23.4691	7.15621	+	NC_005835.1	707820	709056	TT_RS03675	+
NC_005835.1	1392263	1392336	24.7433	7.153	-	NC_005835.1	1391456	1392641	TT_RS07420	-
NC_005838.1	108045	108135	27.7037	7.14328	+	NC_005838.1	107990	109076	TT_RS10710	+
NC_005838.1	109243	109373	30.1574	7.14001	+	NC_005838.1	109072	110260	TT_RS10715	+
NC_005835.1	1761405	1761487	37.861	7.13591	+	NC_005835.1	1761389	1763210	TT_RS09445	+
NC_005838.1	101910	102168	41.9459	7.13183	+	NC_005838.1	101656	103567	TT_RS10680	+
NC_005835.1	298554	298594	29.4265	7.12426	-	NC_005835.1	298380	299031	TT_RS01585	-
NC_005838.1	7384	7461	35.9639	7.12344	+	NC_005838.1	7100	7757	TT_RS10180	+
NC_005835.1	886997	887021	21.2813	7.12173	-	NC_005835.1	886375	887047	TT_RS04580	-
NC_005835.1	1258971	1259011	21.2813	7.12173	-	NC_005835.1	1258615	1259104	TT_RS06615	-
NC_005835.1	1853657	1853692	23.0693	7.11498	+	NC_005835.1	1853656	1853977	TT_RS09900	+
NC_005835.1	340856	340895	106.078	7.10153	+	NC_005835.1	339637	341689	TT_RS01800	+
NC_005835.1	1338846	1338917	22.7241	7.1004	-	NC_005835.1	1338060	1339332	TT_RS07125	-
NC_005835.1	587641	587756	67.9651	7.09483	-	NC_005835.1	586767	588774	TT_RS03065	-
NC_005835.1	1808211	1808275	29.8467	7.08022	-	NC_005835.1	1807821	1808349	TT_RS09665	-
NC_005835.1	299298	299335	36.3809	7.07397	-	NC_005835.1	299027	299789	TT_RS01590	-
NC_005835.1	181502	181591	63.8121	7.0713	+	NC_005835.1	179497	187516	TT_RS01015	+
NC_005835.1	936011	936093	23.308	7.06672	-	NC_005835.1	934888	936103	TT_RS04830	-
NC_005835.1	1458050	1458126	19.8628	7.05574	+	NC_005835.1	1457667	1459482	TT_RS07730	+
NC_005835.1	967329	967357	41.5367	7.05394	+	NC_005835.1	967095	967389	TT_RS04970	+
NC_005835.1	185650	185717	40.1758	7.05301	+	NC_005835.1	179497	187516	TT_RS01015	+
NC_005835.1	1539477	1539524	22.9625	7.05298	-	NC_005835.1	1539339	1540749	TT_RS08205	-
NC_005835.1	156280	156388	46.3917	7.05025	-	NC_005835.1	155469	157680	TT_RS00885	-
NC_005835.1	285183	285279	38.1653	7.04182	+	NC_005835.1	285122	285887	TT_RS01515	+
NC_005835.1	298437	298478	28.6147	7.03045	-	NC_005835.1	298380	299031	TT_RS01585	-
NC_005835.1	802268	802429	20.1021	7.02796	-	NC_005835.1	802233	804321	TT_RS04145	-
NC_005835.1	300726	300767	54.2715	7.02715	-	NC_005835.1	299799	301557	TT_RS01595	-
NC_005835.1	408385	408434	33.6206	7.02695	-	NC_005835.1	408368	409118	TT_RS02125	-
NC_005835.1	708840	708930	39.8162	7.024	+	NC_005835.1	707820	709056	TT_RS03675	+
NC_005838.1	7515	7549	19.5625	7.02276	+	NC_005838.1	7100	7757	TT_RS10180	+
NC_005835.1	967183	967211	34.6224	7.02214	+	NC_005835.1	967095	967389	TT_RS04970	+
NC_005835.1	406488	406634	33.7341	7.0128	-	NC_005835.1	405922	408310	TT_RS02120	-
NC_005835.1	33739	33790	41.6012	6.99528	+	NC_005835.1	32843	34217	TT_RS00175	+
NC_005835.1	344917	344989	18.9955	6.99523	-	NC_005835.1	344678	345572	TT_RS01820	-
NC_005835.1	700675	700771	48.1567	6.99496	+	NC_005835.1	700249	700948	TT_RS03635	+
NC_005835.1	1678896	1678939	22.2195	6.9892	+	NC_005835.1	1678762	1680331	TT_RS09015	+
NC_005835.1	702500	702561	19.6768	6.97697	+	NC_005835.1	701793	703047	TT_RS03645	+
NC_005835.1	903296	903331	19.9655	6.97182	-	NC_005835.1	902447	905348	TT_RS04665	-
NC_005835.1	1808357	1808390	232.354	6.96811	-	NC_005835.1	1808313	1808390	TT_RS09670	-
NC_005835.1	300016	300041	36.7139	6.96247	-	NC_005835.1	299799	301557	TT_RS01595	-
NC_005835.1	1144476	1144541	29.3622	6.95667	+	NC_005835.1	1144119	1145643	TT_RS11410	+
NC_005835.1	722822	722908	28.7164	6.95614	-	NC_005835.1	722513	723059	TT_RS03745	-
NC_005835.1	1678779	1678814	20.5465	6.94868	+	NC_005835.1	1678762	1680331	TT_RS09015	+
NC_005835.1	740277	740335	44.4211	6.94645	-	NC_005835.1	740160	740499	TT_RS03840	-
NC_005835.1	1563134	1563190	20.8387	6.93028	+	NC_005835.1	1562961	1564401	TT_RS08330	+
NC_005838.1	93869	93996	47.6571	6.92649	+	NC_005838.1	92781	95199	TT_RS10645	+
NC_005835.1	1122104	1122152	25.7463	6.91925	+	NC_005835.1	1119930	1122108	TT_RS05835	+
NC_005835.1	1122104	1122152	25.7463	6.91925	+	NC_005835.1	1122100	1123492	TT_RS05840	+
NC_005835.1	1333706	1333763	25.8004	6.9069	-	NC_005835.1	1333388	1334798	TT_RS07100	-
NC_005835.1	1377165	1377212	26.2425	6.90576	-	NC_005835.1	1376985	1377225	TT_RS07370	-
NC_005835.1	1679146	1679254	34.0938	6.89799	+	NC_005835.1	1678762	1680331	TT_RS09015	+
NC_005835.1	999924	999995	24.7366	6.89202	+	NC_005835.1	999000	1000047	TT_RS05160	+
NC_005835.1	591071	591126	17.8772	6.8827	-	NC_005835.1	590513	591485	TT_RS03085	-
NC_005835.1	297964	298013	34.8873	6.88156	-	NC_005835.1	297724	298393	TT_RS01580	-
NC_005838.1	14176	14241	25.2803	6.8786	+	NC_005838.1	13776	14484	TT_RS10220	+
NC_005835.1	1574259	1574320	36.7067	6.87833	+	NC_005835.1	1573768	1574494	TT_RS08410	+
NC_005835.1	1208964	1209015	21.4274	6.87801	-	NC_005835.1	1208914	1209238	TT_RS06330	-
NC_005835.1	1604637	1604717	99.9121	6.87016	-	NC_005835.1	1604233	1605142	TT_RS08570	-
NC_005835.1	217935	218065	35.8964	6.86597	-	NC_005835.1	217461	218835	TT_RS01165	-
NC_005835.1	1200272	1200350	37.6143	6.85812	+	NC_005835.1	1200243	1200582	TT_RS06260	+
NC_005835.1	704197	704266	44.6045	6.85773	+	NC_005835.1	704083	705103	TT_RS03655	+
NC_005835.1	920365	920408	19.1149	6.84914	-	NC_005835.1	919761	920631	TT_RS04750	-
NC_005835.1	1286413	1286493	48.7658	6.84508	+	NC_005835.1	1286127	1288344	TT_RS06835	+
NC_005835.1	19548	19627	33.0641	6.8426	+	NC_005835.1	18924	19868	TT_RS00105	+
NC_005835.1	1389790	1389878	98.3023	6.83764	-	NC_005835.1	1388165	1389890	TT_RS07405	-
NC_005835.1	920654	920686	18.7704	6.83176	-	NC_005835.1	920634	920967	TT_RS04755	-
NC_005838.1	208440	208523	21.3785	6.82925	-	NC_005838.1	207698	209327	TT_RS11160	-
NC_005835.1	1760283	1760325	35.1593	6.82135	-	NC_005835.1	1759751	1761029	TT_RS09435	-
NC_005835.1	1172207	1172303	23.5429	6.82101	-	NC_005835.1	1171516	1172408	TT_RS06110	-
NC_005835.1	1377350	1377393	17.2149	6.81523	-	NC_005835.1	1377221	1377824	TT_RS07375	-
NC_005835.1	1681464	1681495	30.6742	6.81397	+	NC_005835.1	1681160	1681592	TT_RS09025	+
NC_005835.1	1603161	1603219	22.3681	6.81396	+	NC_005835.1	1602537	1604115	TT_RS08560	+
NC_005835.1	1464898	1464959	32.041	6.81355	-	NC_005835.1	1464036	1465599	TT_RS07770	-
NC_005835.1	1068601	1068653	37.1662	6.81124	-	NC_005835.1	1068266	1068689	TT_RS05560	-
NC_005835.1	1576571	1576709	114.169	6.80796	+	NC_005835.1	1575876	1576794	TT_RS08425	+
NC_005835.1	996198	996264	76.0834	6.80756	+	NC_005835.1	994960	997234	TT_RS05145	+
NC_005835.1	1638570	1638687	34.844	6.8036	-	NC_005835.1	1638394	1639567	TT_RS08740	-
NC_005838.1	6752	6815	32.9999	6.80229	+	NC_005838.1	5965	7066	TT_RS10175	+
NC_005835.1	1579213	1579273	30.8325	6.80097	+	NC_005835.1	1578839	1579544	TT_RS08440	+
NC_005835.1	1636899	1636955	24.5677	6.80096	-	NC_005835.1	1636618	1637404	TT_RS08730	-
NC_005835.1	1308693	1308752	20.6878	6.80096	-	NC_005835.1	1308601	1309153	TT_RS06965	-
NC_005835.1	536279	536320	16.6665	6.80095	+	NC_005835.1	535310	536483	TT_RS02785	+
NC_005835.1	1347246	1347283	45.7566	6.79772	-	NC_005835.1	1347049	1347307	TT_RS07180	-
NC_005835.1	467757	467830	33.4492	6.79571	+	NC_005835.1	467126	469583	TT_RS02430	+
NC_005835.1	1464278	1464327	30.813	6.79571	-	NC_005835.1	1464036	1465599	TT_RS07770	-
NC_005835.1	1402091	1402174	28.4522	6.79306	-	NC_005835.1	1401660	1404309	TT_RS07480	-
NC_005835.1	1729940	1729980	22.963	6.79106	+	NC_005835.1	1729688	1731299	TT_RS09280	+
NC_005835.1	1615247	1615305	29.1474	6.78774	+	NC_005835.1	1614584	1615952	TT_RS08630	+
NC_005835.1	251431	251523	23.3604	6.78772	+	NC_005835.1	250324	252901	TT_RS01330	+
NC_005835.1	1120967	1121058	33.2243	6.77878	+	NC_005835.1	1119930	1122108	TT_RS05835	+
NC_005835.1	301052	301091	45.4941	6.77869	-	NC_005835.1	299799	301557	TT_RS01595	-
NC_005835.1	561327	561461	46.0638	6.77699	-	NC_005835.1	561058	562092	TT_RS11375	-
NC_005835.1	1460601	1460681	19.9974	6.77151	-	NC_005835.1	1460264	1461242	TT_RS07745	-
NC_005835.1	117387	117459	16.2635	6.7715	+	NC_005835.1	117217	117913	TT_RS00680	+
NC_005835.1	1289972	1290046	24.0117	6.76741	+	NC_005835.1	1288363	1290547	TT_RS06840	+
NC_005835.1	1062202	1062278	16.9242	6.76326	+	NC_005835.1	1062037	1063183	TT_RS05525	+
NC_005835.1	1551669	1551841	35.0027	6.7618	-	NC_005835.1	1551649	1553476	TT_RS08260	-
NC_005835.1	1372999	1373083	39.7171	6.75961	+	NC_005835.1	1372707	1373511	TT_RS07350	+
NC_005835.1	1209334	1209435	35.4285	6.75145	-	NC_005835.1	1209247	1210558	TT_RS06335	-
NC_005835.1	1269079	1269143	27.8471	6.75073	-	NC_005835.1	1268243	1270319	TT_RS06715	-
NC_005835.1	1750611	1750700	27.0671	6.74932	+	NC_005835.1	1750437	1752084	TT_RS09380	+
NC_005835.1	1345196	1345228	16.1863	6.74648	-	NC_005835.1	1344708	1345254	TT_RS07165	-
NC_005835.1	285967	286085	24.8111	6.74399	+	NC_005835.1	285888	286575	TT_RS01520	+
NC_005835.1	1572640	1572694	27.0213	6.74225	+	NC_005835.1	1572619	1573765	TT_RS08405	+
NC_005835.1	1658339	1658370	15.8609	6.7408	+	NC_005835.1	1658319	1659291	TT_RS08890	+
NC_005835.1	1420463	1420553	21.977	6.73795	+	NC_005835.1	1419651	1421915	TT_RS07555	+
NC_005835.1	1475616	1475711	34.7404	6.73295	-	NC_005835.1	1474922	1476137	TT_RS07840	-
NC_005835.1	1658464	1658517	15.6776	6.73219	+	NC_005835.1	1658319	1659291	TT_RS08890	+
NC_005835.1	1228585	1228648	32.1403	6.72352	+	NC_005835.1	1228563	1229280	TT_RS06435	+
NC_005835.1	1381313	1381469	27.2899	6.70998	-	NC_005835.1	1377887	1382462	TT_RS07380	-
NC_005835.1	354885	354935	22.0925	6.70725	+	NC_005835.1	354832	356071	TT_RS01875	+
NC_005835.1	1245946	1245984	15.7872	6.70275	-	NC_005835.1	1245375	1245999	TT_RS06510	-
NC_005835.1	1729278	1729312	38.5553	6.69776	-	NC_005835.1	1728911	1729424	TT_RS09270	-
NC_005835.1	128498	128558	33.3904	6.69675	+	NC_005835.1	128352	129233	TT_RS00745	+
NC_005835.1	421204	421307	18.7252	6.69673	-	NC_005835.1	420139	421450	TT_RS02190	-
NC_005838.1	12639	12707	22.3335	6.69521	+	NC_005838.1	12313	13417	TT_RS10210	+
NC_005835.1	1032159	1032257	22.3082	6.6914	-	NC_005835.1	1031046	1033125	TT_RS05365	-
NC_005835.1	1130935	1130983	22.8543	6.68987	-	NC_005835.1	1130050	1131007	TT_RS05875	-
NC_005835.1	129292	129408	32.2825	6.68775	+	NC_005835.1	129229	130960	TT_RS00750	+
NC_005835.1	299511	299571	45.1496	6.68762	-	NC_005835.1	299027	299789	TT_RS01590	-
NC_005835.1	392023	392113	17.0978	6.68644	+	NC_005835.1	392004	393198	TT_RS02050	+
NC_005835.1	1401477	1401522	21.3216	6.6845	-	NC_005835.1	1400967	1401651	TT_RS07475	-
NC_005835.1	903497	903594	36.7047	6.68056	-	NC_005835.1	902447	905348	TT_RS04665	-
NC_005835.1	1130793	1130882	21.1304	6.6783	-	NC_005835.1	1130050	1131007	TT_RS05875	-
NC_005835.1	1613536	1613621	26.9889	6.6752	+	NC_005835.1	1613362	1614583	TT_RS08625	+
NC_005835.1	953809	953995	21.6903	6.67519	+	NC_005835.1	952490	954068	TT_RS04905	+
NC_005835.1	538473	538505	15.1187	6.67518	+	NC_005835.1	538448	540683	TT_RS02805	+
NC_005835.1	1499624	1499672	15.1596	6.67048	+	NC_005835.1	1499354	1499798	TT_RS08000	+
NC_005835.1	63613	63692	47.6154	6.66607	+	NC_005835.1	63182	64526	TT_RS00355	+
NC_005835.1	1144699	1144835	58.1987	6.66503	+	NC_005835.1	1144119	1145643	TT_RS11410	+
NC_005835.1	761260	761375	32.6794	6.66173	-	NC_005835.1	759600	762492	TT_RS03945	-
NC_005835.1	1256133	1256199	22.2561	6.65796	-	NC_005835.1	1256121	1256682	TT_RS06595	-
NC_005838.1	107807	107888	21.464	6.65781	+	NC_005838.1	106246	108001	TT_RS10705	+
NC_005835.1	957534	957611	37.5101	6.65623	-	NC_005835.1	957042	958215	TT_RS04925	-
NC_005835.1	1199937	1200006	20.8622	6.6562	+	NC_005835.1	1199917	1200259	TT_RS06255	+
NC_005835.1	129427	129483	19.9039	6.6562	+	NC_005835.1	129229	130960	TT_RS00750	+
NC_005835.1	91037	91125	20.7939	6.6554	+	NC_005835.1	90229	91252	TT_RS00505	+
NC_005835.1	1260095	1260160	20.7949	6.6554	-	NC_005835.1	1260008	1260425	TT_RS06630	-
NC_005835.1	1144589	1144652	35.5841	6.64411	+	NC_005835.1	1144119	1145643	TT_RS11410	+
NC_005835.1	1062134	1062176	14.8179	6.64325	+	NC_005835.1	1062037	1063183	TT_RS05525	+
NC_005835.1	263332	263424	51.0941	6.64267	-	NC_005835.1	263043	263994	TT_RS01415	-
NC_005835.1	182481	182553	33.9614	6.64002	+	NC_005835.1	179497	187516	TT_RS01015	+
NC_005835.1	1253808	1253879	58.9061	6.62681	-	NC_005835.1	1253544	1254174	TT_RS06565	-
NC_005835.1	537571	537625	24.8302	6.62621	+	NC_005835.1	537202	538447	TT_RS02800	+
NC_005835.1	1252991	1253033	35.7885	6.62456	-	NC_005835.1	1252578	1253526	TT_RS06560	-
NC_005835.1	1577715	1577770	43.8525	6.62009	+	NC_005835.1	1577604	1578831	TT_RS08435	+
NC_005835.1	1605277	1605314	33.6043	6.615	-	NC_005835.1	1605138	1605375	TT_RS08575	-
NC_005835.1	1401250	1401347	72.0715	6.61101	-	NC_005835.1	1400967	1401651	TT_RS07475	-
NC_005835.1	485314	485367	29.9561	6.61073	+	NC_005835.1	484819	486016	TT_RS02530	+
NC_005835.1	1437162	1437253	32.6289	6.60662	-	NC_005835.1	1436788	1437976	TT_RS07640	-
NC_005835.1	406668	406730	27.8692	6.60645	-	NC_005835.1	405922	408310	TT_RS02120	-
NC_005835.1	1436190	1436242	14.9912	6.60642	-	NC_005835.1	1435627	1436782	TT_RS07635	-
NC_005835.1	79511	79555	16.5514	6.60298	+	NC_005835.1	79386	80013	TT_RS00440	+
NC_005835.1	430474	430520	16.5514	6.60298	+	NC_005835.1	429959	431315	TT_RS02245	+
NC_005835.1	798191	798244	16.5514	6.60298	-	NC_005835.1	797928	798681	TT_RS04120	-
NC_005835.1	708752	708802	28.3256	6.60041	+	NC_005835.1	707820	709056	TT_RS03675	+
NC_005835.1	1605527	1605576	50.8663	6.59959	-	NC_005835.1	1605359	1606430	TT_RS08580	-
NC_005835.1	1290175	1290371	34.2928	6.59806	+	NC_005835.1	1288363	1290547	TT_RS06840	+
NC_005835.1	1884739	1884833	21.4458	6.59606	+	NC_005835.1	1884077	1885400	TT_RS10075	+
NC_005835.1	1386450	1386517	36.0347	6.5955	-	NC_005835.1	1386040	1386682	TT_RS07390	-
NC_005835.1	1277455	1277597	41.5369	6.59525	+	NC_005835.1	1276881	1277628	TT_RS06770	+
NC_005835.1	1070645	1070705	23.3192	6.59344	-	NC_005835.1	1070448	1071487	TT_RS05570	-
NC_005835.1	64246	64286	27.7116	6.59199	+	NC_005835.1	63182	64526	TT_RS00355	+
NC_005835.1	1268681	1268777	24.9624	6.59177	-	NC_005835.1	1268243	1270319	TT_RS06715	-
NC_005835.1	921079	921125	20.5475	6.58905	-	NC_005835.1	920977	922300	TT_RS04760	-
NC_005835.1	759818	759879	20.3828	6.58817	-	NC_005835.1	759600	762492	TT_RS03945	-
NC_005835.1	893592	893656	20.9776	6.58641	-	NC_005835.1	892485	894444	TT_RS04615	-
NC_005835.1	1660378	1660421	14.5685	6.58551	+	NC_005835.1	1659656	1660526	TT_RS08900	+
NC_005835.1	1045769	1045900	23.3889	6.58359	+	NC_005835.1	1043080	1045939	TT_RS05430	+
NC_005835.1	1121114	1121199	23.2218	6.58021	+	NC_005835.1	1119930	1122108	TT_RS05835	+
NC_005835.1	1631129	1631181	52.1262	6.57925	+	NC_005835.1	1630034	1631666	TT_RS08700	+
NC_005835.1	356908	357004	19.876	6.57691	+	NC_005835.1	356873	358250	TT_RS01885	+
NC_005835.1	1233690	1233763	65.0034	6.57669	-	NC_005835.1	1232980	1234168	TT_RS06455	-
NC_005835.1	893943	894030	30.433	6.57575	-	NC_005835.1	892485	894444	TT_RS04615	-
NC_005835.1	683870	683986	26.5863	6.5753	-	NC_005835.1	683285	684419	TT_RS03555	-
NC_005835.1	590573	590675	37.3143	6.57337	-	NC_005835.1	590513	591485	TT_RS03085	-
NC_005835.1	1435965	1436025	21.5782	6.57034	-	NC_005835.1	1435627	1436782	TT_RS07635	-
NC_005835.1	1270508	1270527	13.9145	6.56942	-	NC_005835.1	1270321	1270792	TT_RS06720	-
NC_005838.1	17505	17548	13.9145	6.56942	+	NC_005838.1	16675	17683	TT_RS10245	+
NC_005835.1	1249665	1249728	49.4107	6.56495	-	NC_005835.1	1248817	1250179	TT_RS06535	-
NC_005835.1	801164	801224	15.2277	6.56398	-	NC_005835.1	799954	801502	TT_RS04135	-
NC_005835.1	1063966	1064038	15.2277	6.56398	+	NC_005835.1	1063184	1064108	TT_RS05530	+
NC_005835.1	993342	993362	13.8541	6.56398	+	NC_005835.1	992894	993518	TT_RS05130	+
NC_005835.1	1477728	1477800	23.5013	6.5579	+	NC_005835.1	1477586	1478183	TT_RS07865	+
NC_005835.1	1804195	1804285	51.7211	6.55664	+	NC_005835.1	1802866	1804420	TT_RS09640	+
NC_005835.1	1166472	1166521	16.5027	6.55297	-	NC_005835.1	1165960	1166779	TT_RS06080	-
NC_005835.1	179857	179941	43.7344	6.54371	+	NC_005835.1	179497	187516	TT_RS01015	+
NC_005835.1	1407591	1407674	14.8846	6.54178	+	NC_005835.1	1406535	1407867	TT_RS07500	+
NC_005835.1	1441328	1441386	14.2312	6.54178	-	NC_005835.1	1440779	1441445	TT_RS07655	-
NC_005835.1	1041803	1041905	16.1586	6.53423	+	NC_005835.1	1041325	1042039	TT_RS05420	+
NC_005835.1	1160800	1160836	30.4128	6.53331	-	NC_005835.1	1160190	1160853	TT_RS06050	-
NC_005835.1	154930	155069	31.6164	6.53147	-	NC_005835.1	154187	155459	TT_RS00880	-
NC_005835.1	338870	338899	13.6997	6.53042	+	NC_005835.1	338360	339254	TT_RS01790	+
NC_005835.1	492811	492894	36.7457	6.52892	-	NC_005835.1	492348	492939	TT_RS02575	-
NC_005835.1	21568	21630	14.2521	6.52851	+	NC_005835.1	21533	21926	TT_RS00115	+
NC_005835.1	1731116	1731153	24.1808	6.52597	+	NC_005835.1	1729688	1731299	TT_RS09280	+
NC_005835.1	337617	337683	18.8672	6.52468	+	NC_005835.1	337123	338239	TT_RS01785	+
NC_005835.1	825220	825275	14.2976	6.52467	-	NC_005835.1	824754	825282	TT_RS04285	-
NC_005835.1	1477496	1477516	212.745	6.52393	-	NC_005835.1	1477442	1477516	TT_RS07860	-
NC_005835.1	1440694	1440742	20.5436	6.52276	-	NC_005835.1	1438772	1440752	TT_RS07650	-
NC_005835.1	1544408	1544444	13.4543	6.52275	-	NC_005835.1	1541857	1544527	TT_RS08215	-
NC_005835.1	1576316	1576342	25.4476	6.52148	+	NC_005835.1	1575876	1576794	TT_RS08425	+
NC_005835.1	494082	494148	14.5417	6.51888	-	NC_005835.1	494001	495300	TT_RS02590	-
NC_005835.1	1591930	1591978	14.5417	6.51888	-	NC_005835.1	1591274	1592432	TT_RS08505	-
NC_005835.1	1256061	1256099	32.5197	6.516	-	NC_005835.1	1255354	1256122	TT_RS06590	-
NC_005835.1	166724	166797	16.8001	6.51304	+	NC_005835.1	166471	168133	TT_RS00950	+
NC_005835.1	1168930	1168966	23.5316	6.5111	-	NC_005835.1	1166785	1169536	TT_RS06085	-
NC_005835.1	797023	797070	21.2706	6.51011	-	NC_005835.1	796213	797071	TT_RS04110	-
NC_005835.1	1346027	1346064	23.229	6.50848	-	NC_005835.1	1345789	1347040	TT_RS07175	-
NC_005835.1	866985	867063	13.9099	6.5032	-	NC_005835.1	866225	867197	TT_RS04495	-
NC_005835.1	1730721	1730764	27.8238	6.50024	+	NC_005835.1	1729688	1731299	TT_RS09280	+
NC_005835.1	419795	419910	20.3066	6.49524	-	NC_005835.1	419181	420117	TT_RS02185	-
NC_005835.1	796542	796604	17.7896	6.49523	-	NC_005835.1	796213	797071	TT_RS04110	-
NC_005835.1	743179	743235	13.3379	6.49523	-	NC_005835.1	742986	743889	TT_RS03860	-
NC_005835.1	1217592	1217646	13.2983	6.49522	+	NC_005835.1	1217285	1218278	TT_RS06385	+
NC_005835.1	1887161	1887205	13.2983	6.49522	-	NC_005835.1	1886950	1887973	TT_RS10090	-
NC_005835.1	1199815	1199877	23.7958	6.49391	+	NC_005835.1	1199546	1199930	TT_RS06250	+
NC_005835.1	3235	3394	27.8041	6.48236	+	NC_005835.1	2665	3985	TT_RS00020	+
NC_005835.1	300240	300388	83.5687	6.48074	-	NC_005835.1	299799	301557	TT_RS01595	-
NC_005835.1	297825	297912	33.4927	6.48026	-	NC_005835.1	297724	298393	TT_RS01580	-
NC_005835.1	802913	802970	14.4903	6.47902	-	NC_005835.1	802233	804321	TT_RS04145	-
NC_005835.1	804175	804241	14.4903	6.47902	-	NC_005835.1	802233	804321	TT_RS04145	-
NC_005835.1	1400743	1400830	24.7521	6.47813	-	NC_005835.1	1400579	1400987	TT_RS07470	-
NC_005835.1	1174728	1174793	18.5161	6.47491	-	NC_005835.1	1174203	1175463	TT_RS06125	-
NC_005835.1	242828	242865	13.2815	6.4749	+	NC_005835.1	241631	245189	TT_RS01290	+
NC_005835.1	1135262	1135345	18.9727	6.46766	-	NC_005835.1	1133651	1135364	TT_RS05900	-
NC_005838.1	6271	6407	28.9193	6.45881	+	NC_005838.1	5965	7066	TT_RS10175	+
NC_005835.1	1834521	1834619	12.8974	6.45822	-	NC_005835.1	1834028	1834640	TT_RS09820	-
NC_005835.1	1285190	1285320	48.3206	6.45533	+	NC_005835.1	1285062	1286131	TT_RS06830	+
NC_005835.1	1318408	1318551	22.4911	6.44833	-	NC_005835.1	1318194	1319340	TT_RS07025	-
NC_005835.1	1720556	1720590	74.3787	6.44653	-	NC_005835.1	1720513	1720735	TT_RS09210	-
NC_005835.1	345468	345545	30.175	6.43685	-	NC_005835.1	344678	345572	TT_RS01820	-
NC_005835.1	733165	733261	25.2638	6.43576	-	NC_005835.1	733118	734051	TT_RS03795	-
NC_005835.1	1008265	1008297	23.7813	6.43575	-	NC_005835.1	1008088	1008409	TT_RS05215	-
NC_005835.1	752704	752758	35.47	6.43541	+	NC_005835.1	752545	752815	TT_RS03920	+
NC_005835.1	1539272	1539319	24.5542	6.43248	-	NC_005835.1	1538332	1539334	TT_RS08200	-
NC_005835.1	1669968	1670023	13.8048	6.43246	-	NC_005835.1	1669542	1670427	TT_RS08960	-
NC_005835.1	1654234	1654281	52.4612	6.43179	+	NC_005835.1	1653826	1654618	TT_RS08860	+
NC_005835.1	848432	848514	32.4812	6.42517	-	NC_005835.1	848117	849173	TT_RS04420	-
NC_005835.1	30969	31034	13.6271	6.42145	-	NC_005835.1	30935	32792	TT_RS00170	-
NC_005835.1	488538	488633	22.3462	6.42127	-	NC_005835.1	488049	489060	TT_RS02550	-
NC_005835.1	1306875	1306954	32.9512	6.41926	-	NC_005835.1	1306630	1307599	TT_RS06955	-
NC_005835.1	355227	355269	29.1017	6.41925	+	NC_005835.1	354832	356071	TT_RS01875	+
NC_005835.1	499278	499352	20.1273	6.41924	-	NC_005835.1	499058	500324	TT_RS02615	-
NC_005835.1	1322721	1322765	17.4457	6.41923	+	NC_005835.1	1322016	1323102	TT_RS07050	+
NC_005835.1	52647	52736	15.0799	6.41923	+	NC_005835.1	52175	52793	TT_RS00280	+
NC_005835.1	168405	168522	15.0799	6.41923	+	NC_005835.1	168132	168810	TT_RS00955	+
NC_005835.1	799203	799335	31.4284	6.41843	-	NC_005835.1	798656	799445	TT_RS04125	-
NC_005835.1	839730	839796	19.4253	6.41589	-	NC_005835.1	839164	839821	TT_RS04365	-
NC_005835.1	1380015	1380079	19.4253	6.41589	-	NC_005835.1	1377887	1382462	TT_RS07380	-
NC_005835.1	1812028	1812082	19.8509	6.41477	-	NC_005835.1	1810778	1812227	TT_RS09695	-
NC_005835.1	1683627	1683676	17.7153	6.41477	-	NC_005835.1	1683169	1683691	TT_RS09040	-
NC_005835.1	1659552	1659614	17.3935	6.41476	+	NC_005835.1	1659287	1659647	TT_RS08895	+
NC_005835.1	509368	509464	17.7481	6.41476	-	NC_005835.1	509133	510345	TT_RS02670	-
NC_005835.1	437532	437589	31.0812	6.41105	-	NC_005835.1	437236	438010	TT_RS02275	-
NC_005835.1	1364101	1364186	14.0975	6.41026	-	NC_005835.1	1363911	1364238	TT_RS07285	-
NC_005835.1	35406	35497	31.8005	6.40426	-	NC_005835.1	35265	36240	TT_RS00185	-
NC_005835.1	1306696	1306780	28.8742	6.39915	-	NC_005835.1	1306630	1307599	TT_RS06955	-
NC_005835.1	902137	902232	18.8884	6.39891	-	NC_005835.1	901403	902432	TT_RS04660	-
NC_005835.1	218901	218946	12.688	6.3989	-	NC_005835.1	218822	219776	TT_RS01170	-
NC_005835.1	916081	916223	42.1946	6.39781	-	NC_005835.1	915821	916655	TT_RS04730	-
NC_005835.1	152636	152718	18.1334	6.39777	+	NC_005835.1	152152	153187	TT_RS00870	+
NC_005835.1	1402256	1402317	18.2691	6.39201	-	NC_005835.1	1401660	1404309	TT_RS07480	-
NC_005835.1	1692338	1692474	18.3782	6.39089	-	NC_005835.1	1692262	1694275	TT_RS09085	-
NC_005835.1	1813775	1813890	26.591	6.3868	-	NC_005835.1	1813282	1815061	TT_RS09705	-
NC_005835.1	1168423	1168471	33.9793	6.38273	-	NC_005835.1	1166785	1169536	TT_RS06085	-
NC_005835.1	502857	502951	17.0585	6.3827	-	NC_005835.1	502168	503278	TT_RS02630	-
NC_005835.1	131947	131989	12.2593	6.38269	+	NC_005835.1	130972	132022	TT_RS00755	+
NC_005835.1	1194454	1194491	12.2593	6.38269	-	NC_005835.1	1193900	1194665	TT_RS06220	-
NC_005835.1	1168991	1169055	32.0293	6.38195	-	NC_005835.1	1166785	1169536	TT_RS06085	-
NC_005835.1	1249428	1249469	34.6393	6.37803	-	NC_005835.1	1248817	1250179	TT_RS06535	-
NC_005835.1	531193	531256	12.1591	6.37799	-	NC_005835.1	530809	531307	TT_RS02755	-
NC_005835.1	1321889	1321921	12.1591	6.37799	+	NC_005835.1	1321805	1322045	TT_RS07045	+
NC_005835.1	25372	25450	18.0898	6.37327	-	NC_005835.1	23891	26366	TT_RS00135	-
NC_005835.1	723785	723919	15.3786	6.37327	-	NC_005835.1	723101	724124	TT_RS03750	-
NC_005835.1	1367691	1367759	36.5002	6.37172	+	NC_005835.1	1366478	1367783	TT_RS07305	+
NC_005835.1	339718	339821	246.931	6.36451	+	NC_005835.1	339637	341689	TT_RS01800	+
NC_005835.1	1564556	1564616	30.133	6.36374	+	NC_005835.1	1564400	1565168	TT_RS08335	+
NC_005835.1	372572	372614	13.412	6.36371	+	NC_005835.1	372280	372655	TT_RS01945	+
NC_005835.1	1458589	1458622	12.2866	6.36371	+	NC_005835.1	1457667	1459482	TT_RS07730	+
NC_005835.1	261924	261952	11.9773	6.36371	-	NC_005835.1	261253	262882	TT_RS01410	-
NC_005835.1	1694200	1694244	11.9773	6.36371	-	NC_005835.1	1692262	1694275	TT_RS09085	-
NC_005838.1	94155	94249	47.9783	6.36183	+	NC_005838.1	92781	95199	TT_RS10645	+
NC_005835.1	447065	447150	20.7338	6.36131	+	NC_005835.1	445909	447163	TT_RS02330	+
NC_005835.1	1120737	1120769	17.446	6.35768	+	NC_005835.1	1119930	1122108	TT_RS05835	+
NC_005835.1	155762	155802	20.6959	6.35078	-	NC_005835.1	155469	157680	TT_RS00885	-
NC_005835.1	1248463	1248487	25.5645	6.34916	-	NC_005835.1	1248045	1248816	TT_RS06530	-
NC_005835.1	761503	761579	24.7524	6.34547	-	NC_005835.1	759600	762492	TT_RS03945	-
NC_005835.1	975380	975461	53.866	6.34328	+	NC_005835.1	975176	975785	TT_RS05020	+
NC_005835.1	24682	24764	21.0518	6.34299	-	NC_005835.1	23891	26366	TT_RS00135	-
NC_005835.1	1823407	1823481	20.3897	6.34258	-	NC_005835.1	1822038	1824390	TT_RS09745	-
NC_005835.1	1377436	1377494	32.1155	6.34053	-	NC_005835.1	1377221	1377824	TT_RS07375	-
NC_005835.1	301504	301540	56.7891	6.33995	-	NC_005835.1	299799	301557	TT_RS01595	-
NC_005835.1	1873494	1873617	23.2731	6.33927	-	NC_005835.1	1872516	1873641	TT_RS10015	-
NC_005835.1	1657888	1657943	16.5578	6.33926	+	NC_005835.1	1657676	1658330	TT_RS08885	+
NC_005835.1	1159955	1159988	13.0695	6.33925	-	NC_005835.1	1159910	1160210	TT_RS06045	-
NC_005835.1	182849	182899	33.8002	6.33742	+	NC_005835.1	179497	187516	TT_RS01015	+
NC_005835.1	1401878	1402013	55.8262	6.33684	-	NC_005835.1	1401660	1404309	TT_RS07480	-
NC_005835.1	1392686	1392744	14.6909	6.33426	-	NC_005835.1	1392613	1393399	TT_RS07425	-
NC_005835.1	904637	904666	19.0026	6.32924	-	NC_005835.1	902447	905348	TT_RS04665	-
NC_005835.1	1609129	1609215	19.0026	6.32924	+	NC_005835.1	1608515	1609265	TT_RS08605	+
NC_005835.1	1119435	1119473	17.532	6.32672	+	NC_005835.1	1119217	1119931	TT_RS05830	+
NC_005835.1	37118	37180	11.6383	6.3267	+	NC_005835.1	37098	38025	TT_RS00195	+
NC_005835.1	1612162	1612204	11.6383	6.3267	+	NC_005835.1	1610661	1613352	TT_RS08620	+
NC_005835.1	722207	722266	24.3582	6.32589	-	NC_005835.1	721655	722517	TT_RS03740	-
NC_005835.1	1118404	1118468	16.2654	6.32291	+	NC_005835.1	1118286	1118541	TT_RS05820	+
NC_005835.1	127523	127648	62.7845	6.31761	+	NC_005835.1	126617	128348	TT_RS00740	+
NC_005835.1	904308	904344	25.7034	6.31396	-	NC_005835.1	902447	905348	TT_RS04665	-
NC_005835.1	1566260	1566302	17.8121	6.31395	+	NC_005835.1	1566141	1566519	TT_RS08350	+
NC_005835.1	825352	825394	11.9509	6.31394	-	NC_005835.1	825307	826870	TT_RS04290	-
NC_005835.1	1343809	1343882	30.4575	6.31182	-	NC_005835.1	1343611	1344709	TT_RS07160	-
NC_005835.1	296031	296083	16.4621	6.31137	-	NC_005835.1	295216	296266	TT_RS01565	-
NC_005835.1	127849	127921	21.8897	6.30792	+	NC_005835.1	126617	128348	TT_RS00740	+
NC_005835.1	1872400	1872433	11.8075	6.30356	-	NC_005835.1	1872193	1872440	TT_RS11465	-
NC_005835.1	1347499	1347559	78.91	6.30248	-	NC_005835.1	1347310	1347616	TT_RS07185	-
NC_005835.1	1552604	1552647	16.7017	6.30226	-	NC_005835.1	1551649	1553476	TT_RS08260	-
NC_005835.1	815320	815413	12.095	6.30094	-	NC_005835.1	814520	815666	TT_RS04225	-
NC_005835.1	754306	754343	15.9237	6.29568	+	NC_005835.1	752876	755018	TT_RS03925	+
NC_005835.1	1665900	1665942	11.5227	6.29567	-	NC_005835.1	1665841	1666045	TT_RS08930	-
NC_005835.1	863195	863283	22.4986	6.29371	-	NC_005835.1	863090	866084	TT_RS04490	-
NC_005835.1	336410	336485	16.7151	6.29304	-	NC_005835.1	336041	336515	TT_RS01780	-
NC_005835.1	917888	917931	31.7041	6.29129	-	NC_005835.1	917699	919169	TT_RS04740	-
NC_005835.1	1193746	1193891	27.0642	6.28948	-	NC_005835.1	1191942	1193901	TT_RS06215	-
NC_005835.1	1270338	1270380	24.2911	6.28773	-	NC_005835.1	1270321	1270792	TT_RS06720	-
NC_005835.1	1697738	1697800	20.7476	6.28772	+	NC_005835.1	1697046	1698126	TT_RS09105	+
NC_005835.1	18712	18778	18.7185	6.28772	+	NC_005835.1	17854	18922	TT_RS00100	+
NC_005835.1	1559843	1559891	18.9666	6.28772	+	NC_005835.1	1559342	1560587	TT_RS08310	+
NC_005835.1	1085296	1085428	13.0209	6.28771	-	NC_005835.1	1085219	1085666	TT_RS05635	-
NC_005835.1	391013	391065	12.3853	6.2877	+	NC_005835.1	390420	391995	TT_RS02045	+
NC_005835.1	1258510	1258531	11.2997	6.2877	-	NC_005835.1	1258452	1258635	TT_RS06610	-
NC_005835.1	1538774	1538874	24.0595	6.2875	-	NC_005835.1	1538332	1539334	TT_RS08200	-
NC_005835.1	538038	538105	29.1306	6.28417	+	NC_005835.1	537202	538447	TT_RS02800	+
NC_005835.1	1275751	1275798	25.6042	6.28237	-	NC_005835.1	1275337	1276120	TT_RS06760	-
NC_005835.1	1044506	1044566	19.9264	6.27876	+	NC_005835.1	1043080	1045939	TT_RS05430	+
NC_005835.1	28267	28309	17.9689	6.2783	-	NC_005835.1	27402	28413	TT_RS00145	-
NC_005835.1	753548	753607	21.1995	6.27786	+	NC_005835.1	752876	755018	TT_RS03925	+
NC_005835.1	1564696	1564824	62.9354	6.27701	+	NC_005835.1	1564400	1565168	TT_RS08335	+
NC_005835.1	386323	386357	23.0027	6.27696	-	NC_005835.1	386258	386918	TT_RS02020	-
NC_005835.1	1391683	1391750	33.6504	6.27324	-	NC_005835.1	1391456	1392641	TT_RS07420	-
NC_005835.1	619255	619305	49.5284	6.27319	+	NC_005835.1	619237	620206	TT_RS03210	+
NC_005835.1	1162996	1163073	27.6231	6.27152	-	NC_005835.1	1162777	1163734	TT_RS06065	-
NC_005835.1	1336889	1336935	26.2783	6.27152	-	NC_005835.1	1336658	1337030	TT_RS07115	-
NC_005835.1	333627	333697	21.7519	6.27151	-	NC_005835.1	332905	334621	TT_RS01765	-
NC_005835.1	458511	458626	16.6754	6.2715	-	NC_005835.1	457098	458647	TT_RS02380	-
NC_005835.1	1742115	1742193	12.558	6.27149	+	NC_005835.1	1742096	1743923	TT_RS09330	+
NC_005835.1	679153	679220	11.4671	6.27149	-	NC_005835.1	677891	679244	TT_RS03535	-
NC_005835.1	920717	920739	11.4671	6.27149	-	NC_005835.1	920634	920967	TT_RS04755	-
NC_005835.1	908570	908624	15.967	6.27013	-	NC_005835.1	908379	908940	TT_RS04690	-
NC_005835.1	299706	299746	45.4882	6.26053	-	NC_005835.1	299027	299789	TT_RS01590	-
NC_005835.1	535351	535420	22.0835	6.2605	+	NC_005835.1	535310	536483	TT_RS02785	+
NC_005835.1	1749570	1749608	19.6106	6.25957	+	NC_005835.1	1749272	1750460	TT_RS09375	+
NC_005835.1	1255375	1255409	43.0721	6.2583	-	NC_005835.1	1255354	1256122	TT_RS06590	-
NC_005835.1	1209059	1209088	16.9752	6.25771	-	NC_005835.1	1208914	1209238	TT_RS06330	-
NC_005835.1	978354	978400	18.0384	6.25492	+	NC_005835.1	977509	978763	TT_RS05040	+
NC_005835.1	653380	653408	35.2036	6.2532	+	NC_005835.1	653359	654217	TT_RS03390	+
NC_005835.1	1478521	1478740	59.1143	6.25178	+	NC_005835.1	1478179	1479850	TT_RS07870	+
NC_005835.1	1413883	1413933	22.4824	6.25072	+	NC_005835.1	1412981	1414388	TT_RS07520	+
NC_005835.1	887067	887101	15.4256	6.25071	-	NC_005835.1	887057	888494	TT_RS04585	-
NC_005838.1	18512	18603	23.6442	6.24932	+	NC_005838.1	17887	19906	TT_RS10255	+
NC_005835.1	1336499	1336537	23.3642	6.2465	-	NC_005835.1	1335801	1336659	TT_RS07110	-
NC_005835.1	1413794	1413829	15.2932	6.2408	+	NC_005835.1	1412981	1414388	TT_RS07520	+
NC_005838.1	99176	99220	11.4132	6.24079	+	NC_005838.1	98387	99782	TT_RS10670	+
NC_005835.1	1305291	1305363	21.5699	6.23796	+	NC_005835.1	1305273	1305984	TT_RS06945	+
NC_005835.1	4514	4573	14.3046	6.23794	+	NC_005835.1	4325	6134	TT_RS00030	+
NC_005835.1	347128	347200	14.3046	6.23794	-	NC_005835.1	345568	347311	TT_RS01825	-
NC_005835.1	1511906	1511941	10.9022	6.23793	+	NC_005835.1	1510172	1512530	TT_RS08065	+
NC_005835.1	1666709	1666746	10.9022	6.23793	-	NC_005835.1	1666047	1667022	TT_RS08935	-
NC_005835.1	1372561	1372626	32.276	6.23271	+	NC_005835.1	1372403	1372742	TT_RS07345	+
NC_005835.1	1323239	1323412	27.6477	6.23204	+	NC_005835.1	1323116	1324712	TT_RS07055	+
NC_005835.1	1787923	1788018	19.2005	6.23028	-	NC_005835.1	1787737	1789366	TT_RS09575	-
NC_005835.1	784129	784293	29.4055	6.22933	+	NC_005835.1	782781	784782	TT_RS04065	+
NC_005835.1	1677425	1677584	57.414	6.2258	+	NC_005835.1	1677316	1678426	TT_RS09005	+
NC_005835.1	1379361	1379416	21.4893	6.22496	-	NC_005835.1	1377887	1382462	TT_RS07380	-
NC_005835.1	1885702	1885740	16.7378	6.22349	+	NC_005835.1	1885401	1886034	TT_RS10080	+
NC_005835.1	973790	973950	25.6543	6.22212	+	NC_005835.1	971722	974140	TT_RS05000	+
NC_005835.1	1008125	1008167	21.5527	6.22204	-	NC_005835.1	1008088	1008409	TT_RS05215	-
NC_005835.1	1070728	1070833	38.9068	6.21767	-	NC_005835.1	1070448	1071487	TT_RS05570	-
NC_005835.1	1390518	1390545	16.2878	6.21762	-	NC_005835.1	1389890	1390913	TT_RS07410	-
NC_005835.1	903352	903447	31.7421	6.21459	-	NC_005835.1	902447	905348	TT_RS04665	-
NC_005835.1	1254844	1254879	41.8637	6.21398	-	NC_005835.1	1254612	1254993	TT_RS06575	-
NC_005835.1	561490	561566	30.3894	6.21285	-	NC_005835.1	561058	562092	TT_RS11375	-
NC_005835.1	659238	659308	15.0928	6.21171	-	NC_005835.1	658017	659322	TT_RS03430	-
NC_005835.1	147656	147709	14.9528	6.20873	+	NC_005835.1	147247	148465	TT_RS00845	+
NC_005835.1	1350324	1350433	17.6763	6.20275	+	NC_005835.1	1349895	1351359	TT_RS07210	+
NC_005835.1	1704449	1704539	15.6426	6.20275	-	NC_005835.1	1704415	1704829	TT_RS09145	-
NC_005835.1	1065302	1065355	15.2318	6.20275	-	NC_005835.1	1065070	1065451	TT_RS05540	-
NC_005835.1	1436587	1436620	11.3611	6.20274	-	NC_005835.1	1435627	1436782	TT_RS07635	-
NC_005835.1	1356062	1356106	11.2823	6.20274	+	NC_005835.1	1355992	1356307	TT_RS07230	+
NC_005835.1	963572	963673	27.3888	6.19866	-	NC_005835.1	963017	963833	TT_RS04945	-
NC_005835.1	1577953	1577991	28.4099	6.19775	+	NC_005835.1	1577604	1578831	TT_RS08435	+
NC_005835.1	1345731	1345758	15.046	6.19671	-	NC_005835.1	1345228	1345789	TT_RS07170	-
NC_005835.1	1336048	1336142	26.9027	6.19646	-	NC_005835.1	1335801	1336659	TT_RS07110	-
NC_005835.1	1442320	1442355	14.7579	6.19519	-	NC_005835.1	1442114	1442495	TT_RS07665	-
NC_005835.1	1654406	1654477	80.8553	6.18815	+	NC_005835.1	1653826	1654618	TT_RS08860	+
NC_005835.1	145884	145947	20.0254	6.18757	-	NC_005835.1	144754	146026	TT_RS00835	-
NC_005835.1	1762460	1762501	20.0254	6.18757	+	NC_005835.1	1761389	1763210	TT_RS09445	+
NC_005835.1	1721176	1721297	21.9613	6.18714	-	NC_005835.1	1720850	1721903	TT_RS09215	-
NC_005835.1	1657989	1658045	19.3643	6.18552	+	NC_005835.1	1657676	1658330	TT_RS08885	+
NC_005835.1	1484056	1484124	28.1748	6.18451	+	NC_005835.1	1483174	1484287	TT_RS07905	+
NC_005835.1	863610	863682	16.0612	6.18449	-	NC_005835.1	863090	866084	TT_RS04490	-
NC_005835.1	556363	556440	29.4083	6.18374	+	NC_005835.1	555834	556868	TT_RS11370	+
NC_005835.1	917521	917551	15.6011	6.17518	-	NC_005835.1	916654	917703	TT_RS04735	-
NC_005835.1	1620262	1620303	11.3513	6.17517	+	NC_005835.1	1619611	1620787	TT_RS08660	+
NC_005838.1	209221	209262	11.3513	6.17517	-	NC_005838.1	207698	209327	TT_RS11160	-
NC_005835.1	351002	351068	10.7328	6.17517	-	NC_005835.1	350406	351081	TT_RS01845	-
NC_005835.1	762019	762115	22.1982	6.17471	-	NC_005835.1	759600	762492	TT_RS03945	-
NC_005835.1	153859	154035	81.8885	6.1734	-	NC_005835.1	153180	154191	TT_RS00875	-
NC_005838.1	91498	91574	29.0665	6.17051	-	NC_005838.1	91070	92104	TT_RS11505	-
NC_005835.1	76898	76935	14.6255	6.17048	+	NC_005835.1	76496	76946	TT_RS00425	+
NC_005835.1	1159337	1159381	23.2545	6.16576	-	NC_005835.1	1158713	1159904	TT_RS06040	-
NC_005835.1	1470232	1470290	18.4769	6.16575	-	NC_005835.1	1469387	1470650	TT_RS07805	-
NC_005835.1	890591	890632	14.4585	6.16575	-	NC_005835.1	890570	891542	TT_RS04600	-
NC_005835.1	353378	353413	10.4485	6.16574	+	NC_005835.1	353170	354235	TT_RS01865	+
NC_005835.1	173011	173132	29.0391	6.16207	-	NC_005835.1	172515	174984	TT_RS00980	-
NC_005835.1	309505	309593	36.229	6.16049	-	NC_005835.1	308991	310161	TT_RS01645	-
NC_005838.1	73309	73403	46.1338	6.15998	+	NC_005838.1	72919	73609	TT_RS10530	+
NC_005835.1	1167773	1167824	38.6458	6.1573	-	NC_005835.1	1166785	1169536	TT_RS06085	-
NC_005835.1	373340	373429	28.5988	6.15622	-	NC_005835.1	373313	374165	TT_RS01955	-
NC_005835.1	1660606	1660727	19.7586	6.1562	+	NC_005835.1	1660593	1661925	TT_RS08905	+
NC_005835.1	347506	347577	17.9314	6.1562	-	NC_005835.1	347335	348601	TT_RS01830	-
NC_005835.1	77673	77709	11.3112	6.15619	+	NC_005835.1	76961	78086	TT_RS00430	+
NC_005835.1	187712	187770	10.288	6.15618	+	NC_005835.1	187528	188560	TT_RS01020	+
NC_005835.1	1237805	1237919	19.6167	6.15478	-	NC_005835.1	1235684	1237919	TT_RS06470	-
NC_005835.1	1579833	1579925	25.4501	6.15364	-	NC_005835.1	1579490	1579934	TT_RS08445	-
NC_005835.1	920557	920614	27.6774	6.153	-	NC_005835.1	919761	920631	TT_RS04750	-
NC_005835.1	1151823	1151944	11.9473	6.15297	-	NC_005835.1	1151409	1152072	TT_RS05990	-
NC_005835.1	1555190	1555293	32.9817	6.14655	+	NC_005835.1	1554830	1555637	TT_RS08275	+
NC_005835.1	298980	299007	20.2771	6.14652	-	NC_005835.1	298380	299031	TT_RS01585	-
NC_005835.1	226426	226560	29.2315	6.14366	-	NC_005835.1	225451	226588	TT_RS01205	-
NC_005835.1	50987	51069	15.3858	6.14325	-	NC_005835.1	50359	51076	TT_RS00270	-
NC_005835.1	155477	155517	25.0745	6.14164	-	NC_005835.1	155469	157680	TT_RS00885	-
NC_005835.1	1511719	1511806	16.8604	6.14072	+	NC_005835.1	1510172	1512530	TT_RS08065	+
NC_005835.1	386442	386538	51.8707	6.14032	-	NC_005835.1	386258	386918	TT_RS02020	-
NC_005835.1	486165	486252	20.524	6.13999	+	NC_005835.1	486012	486798	TT_RS02535	+
NC_005835.1	910005	910044	14.3043	6.13998	+	NC_005835.1	909730	911050	TT_RS04700	+
NC_005835.1	1717564	1717611	10.68	6.13997	+	NC_005835.1	1712093	1718297	TT_RS09185	+
NC_005835.1	249590	249634	10.3933	6.13997	+	NC_005835.1	249569	250328	TT_RS01325	+
NC_005838.1	111696	111756	10.3933	6.13997	+	NC_005838.1	111486	112532	TT_RS10730	+
NC_005835.1	699400	699514	41.8788	6.13816	+	NC_005835.1	698957	700274	TT_RS03630	+
NC_005835.1	1454373	1454423	84.4724	6.13777	-	NC_005835.1	1454320	1457167	TT_RS07725	-
NC_005835.1	1811724	1811850	21.977	6.13753	-	NC_005835.1	1810778	1812227	TT_RS09695	-
NC_005835.1	1515123	1515229	58.4523	6.13215	-	NC_005835.1	1514845	1515340	TT_RS08085	-
NC_005835.1	1159738	1159813	46.2829	6.13178	-	NC_005835.1	1158713	1159904	TT_RS06040	-
NC_005835.1	1305205	1305243	14.6146	6.13174	+	NC_005835.1	1305070	1305277	TT_RS06940	+
NC_005835.1	218524	218572	24.1363	6.1301	-	NC_005835.1	217461	218835	TT_RS01165	-
NC_005835.1	1867867	1867930	14.7719	6.13008	+	NC_005835.1	1866860	1868012	TT_RS09985	+
NC_005835.1	45100	45143	17.0572	6.12897	-	NC_005835.1	44351	45269	TT_RS00235	-
NC_005835.1	800679	800740	11.6053	6.12674	-	NC_005835.1	799954	801502	TT_RS04135	-
NC_005835.1	1841149	1841201	10.9701	6.12674	+	NC_005835.1	1840329	1842804	TT_RS09830	+
NC_005835.1	984637	984687	10.11	6.12674	+	NC_005835.1	984174	984936	TT_RS05075	+
NC_005835.1	338407	338454	24.0006	6.12174	+	NC_005835.1	338360	339254	TT_RS01790	+
NC_005835.1	1011684	1011749	22.2295	6.11836	-	NC_005835.1	1010775	1011756	TT_RS05235	-
NC_005835.1	94284	94372	15.8619	6.11425	+	NC_005835.1	94242	95208	TT_RS00530	+
NC_005835.1	918315	918371	60.2218	6.11309	-	NC_005835.1	917699	919169	TT_RS04740	-
NC_005835.1	1165184	1165316	27.1951	6.11296	-	NC_005835.1	1163862	1165317	TT_RS06070	-
NC_005835.1	1764840	1764915	39.4912	6.11228	-	NC_005835.1	1764534	1764999	TT_RS09460	-
NC_005835.1	1168597	1168693	60.0227	6.10784	-	NC_005835.1	1166785	1169536	TT_RS06085	-
NC_005835.1	999135	999197	14.4358	6.10642	+	NC_005835.1	999000	1000047	TT_RS05160	+
NC_005835.1	1466229	1466275	10.34	6.10642	-	NC_005835.1	1465603	1466413	TT_RS07775	-
NC_005835.1	1101411	1101454	20.6886	6.10299	-	NC_005835.1	1100716	1101592	TT_RS05720	-
NC_005835.1	975205	975283	48.2564	6.10212	+	NC_005835.1	975176	975785	TT_RS05020	+
NC_005835.1	443834	443964	18.0653	6.10157	+	NC_005835.1	443337	444132	TT_RS02315	+
NC_005835.1	279875	279942	27.6092	6.09955	-	NC_005835.1	279440	280474	TT_RS11330	-
NC_005835.1	1391628	1391675	17.7431	6.09953	-	NC_005835.1	1391456	1392641	TT_RS07420	-
NC_005835.1	54049	54093	13.8922	6.09952	+	NC_005835.1	53513	54557	TT_RS00295	+
NC_005835.1	1724779	1724809	11.2636	6.09951	+	NC_005835.1	1724533	1725361	TT_RS09235	+
NC_005835.1	705820	705914	25.0468	6.09606	+	NC_005835.1	705099	706440	TT_RS03660	+
NC_005835.1	1012100	1012149	19.5448	6.09605	-	NC_005835.1	1011752	1012172	TT_RS05240	-
NC_005835.1	1226105	1226161	16.5785	6.09605	-	NC_005835.1	1226025	1226406	TT_RS06420	-
NC_005835.1	1676640	1676696	13.6922	6.09604	+	NC_005835.1	1676375	1677314	TT_RS09000	+
NC_005835.1	1415942	1416009	35.341	6.0955	+	NC_005835.1	1415738	1416041	TT_RS07530	+
NC_005835.1	530381	530507	34.0314	6.09208	-	NC_005835.1	527786	530813	TT_RS02750	-
NC_005835.1	1257490	1257556	37.0207	6.08978	-	NC_005835.1	1256685	1258002	TT_RS06600	-
NC_005835.1	1726192	1726247	21.8874	6.08553	-	NC_005835.1	1726079	1726574	TT_RS09245	-
NC_005835.1	1278417	1278451	247.448	6.08431	-	NC_005835.1	1278358	1278451	TT_RS06780	-
NC_005835.1	697806	697911	10.4131	6.08121	+	NC_005835.1	697654	698974	TT_RS03625	+
NC_005835.1	1727048	1727089	28.4829	6.08081	-	NC_005835.1	1726570	1727140	TT_RS09250	-
NC_005835.1	1485646	1485732	22.5457	6.08021	+	NC_005835.1	1485521	1486091	TT_RS07915	+
NC_005835.1	1160719	1160765	25.1885	6.07724	-	NC_005835.1	1160190	1160853	TT_RS06050	-
NC_005835.1	1698838	1698918	29.6818	6.07486	-	NC_005835.1	1698192	1699692	TT_RS09110	-
NC_005835.1	961830	961894	12.5267	6.07263	-	NC_005835.1	961811	962945	TT_RS04940	-
NC_005835.1	1401684	1401740	17.6786	6.07124	-	NC_005835.1	1401660	1404309	TT_RS07480	-
NC_005835.1	132269	132326	17.1348	6.07123	+	NC_005835.1	132040	132427	TT_RS00760	+
NC_005835.1	1880256	1880306	10.9222	6.07122	-	NC_005835.1	1878911	1880999	TT_RS10050	-
NC_005835.1	1520587	1520625	10.0005	6.07122	-	NC_005835.1	1520424	1521174	TT_RS08120	-
NC_005835.1	255792	255904	31.1605	6.06946	-	NC_005835.1	255001	256252	TT_RS01365	-
NC_005835.1	1465124	1465164	26.7795	6.06945	-	NC_005835.1	1464036	1465599	TT_RS07770	-
NC_005835.1	1852294	1852372	13.4302	6.06942	+	NC_005835.1	1851924	1852590	TT_RS09890	+
NC_005835.1	1233786	1233841	50.4969	6.06819	-	NC_005835.1	1232980	1234168	TT_RS06455	-
NC_005835.1	1611047	1611173	23.4694	6.06805	+	NC_005835.1	1610661	1613352	TT_RS08620	+
NC_005835.1	992181	992314	57.1921	6.06415	+	NC_005835.1	991768	992902	TT_RS05125	+
NC_005835.1	1533553	1533645	29.3386	6.06401	-	NC_005835.1	1533350	1534040	TT_RS08175	-
NC_005835.1	1449216	1449274	14.653	6.06398	+	NC_005835.1	1448466	1449345	TT_RS07700	+
NC_005835.1	741170	741216	17.3782	6.06155	-	NC_005835.1	740509	741847	TT_RS03845	-
NC_005835.1	180750	180876	45.617	6.06075	+	NC_005835.1	179497	187516	TT_RS01015	+
NC_005835.1	1288676	1288714	16.2867	6.05789	+	NC_005835.1	1288363	1290547	TT_RS06840	+
NC_005835.1	152404	152498	17.95	6.05666	+	NC_005835.1	152152	153187	TT_RS00870	+
NC_005835.1	57791	57874	9.55468	6.05665	+	NC_005835.1	56881	58363	TT_RS00315	+
NC_005835.1	1654570	1654608	54.3051	6.05302	+	NC_005835.1	1653826	1654618	TT_RS08860	+
NC_005835.1	1438638	1438683	18.5592	6.05298	-	NC_005835.1	1437986	1438769	TT_RS07645	-
NC_005835.1	4349	4398	9.49379	6.05296	+	NC_005835.1	4325	6134	TT_RS00030	+
NC_005835.1	653722	653775	26.1938	6.05206	+	NC_005835.1	653359	654217	TT_RS03390	+
NC_005835.1	1654367	1654398	39.7004	6.04744	+	NC_005835.1	1653826	1654618	TT_RS08860	+
NC_005835.1	309766	309874	67.6985	6.04685	-	NC_005835.1	308991	310161	TT_RS01645	-
NC_005835.1	122433	122478	15.1459	6.04366	-	NC_005835.1	121902	123012	TT_RS00705	-
NC_005835.1	1128680	1128772	32.072	6.04322	+	NC_005835.1	1127601	1129188	TT_RS05865	+
NC_005835.1	1381822	1381921	31.869	6.04181	-	NC_005835.1	1377887	1382462	TT_RS07380	-
NC_005835.1	1315903	1315970	23.4454	6.0418	-	NC_005835.1	1315177	1316191	TT_RS07010	-
NC_005835.1	1444277	1444332	12.5481	6.04178	-	NC_005835.1	1443829	1444525	TT_RS07675	-
NC_005835.1	1004799	1004884	11.5704	6.04178	-	NC_005835.1	1004120	1004885	TT_RS05190	-
NC_005835.1	531496	531534	10.5811	6.04177	-	NC_005835.1	531303	532458	TT_RS02760	-
NC_005835.1	1365766	1365878	55.8557	6.04153	+	NC_005835.1	1365271	1366492	TT_RS07300	+
NC_005835.1	1499183	1499234	20.2501	6.03897	+	NC_005835.1	1499010	1499355	TT_RS07995	+
NC_005835.1	1543303	1543450	33.3685	6.03645	-	NC_005835.1	1541857	1544527	TT_RS08215	-
NC_005835.1	144627	144670	17.0112	6.03423	-	NC_005835.1	143878	144706	TT_RS00830	-
NC_005835.1	894630	894673	15.9571	6.03423	-	NC_005835.1	894440	894803	TT_RS04620	-
NC_005835.1	1411234	1411310	14.2303	6.03423	+	NC_005835.1	1409393	1412150	TT_RS07510	+
NC_005835.1	1756798	1756850	13.172	6.03423	+	NC_005835.1	1756530	1757424	TT_RS09415	+
NC_005835.1	723951	724012	9.66145	6.03422	-	NC_005835.1	723101	724124	TT_RS03750	-
NC_005835.1	1193668	1193704	13.5458	6.03042	-	NC_005835.1	1191942	1193901	TT_RS06215	-
NC_005835.1	1580542	1580621	11.2189	6.03042	-	NC_005835.1	1579993	1580959	TT_RS08450	-
NC_005835.1	1541776	1541815	10.6909	6.03041	-	NC_005835.1	1540759	1541845	TT_RS08210	-
NC_005835.1	1392443	1392461	9.94897	6.03041	-	NC_005835.1	1391456	1392641	TT_RS07420	-
NC_005835.1	1543797	1543844	13.7036	6.02851	-	NC_005835.1	1541857	1544527	TT_RS08215	-
NC_005835.1	1760139	1760185	31.6518	6.02599	-	NC_005835.1	1759751	1761029	TT_RS09435	-
NC_005835.1	1402604	1402709	20.2462	6.02595	-	NC_005835.1	1401660	1404309	TT_RS07480	-
NC_005835.1	156655	156709	26.1554	6.0247	-	NC_005835.1	155469	157680	TT_RS00885	-
NC_005835.1	1605002	1605074	76.0128	6.02444	-	NC_005835.1	1604233	1605142	TT_RS08570	-
NC_005835.1	382391	382454	14.8024	6.02275	+	NC_005835.1	381858	382611	TT_RS01990	+
NC_005835.1	1292226	1292279	14.8024	6.02275	+	NC_005835.1	1291242	1293639	TT_RS06855	+
NC_005835.1	807183	807315	16.222	6.02014	+	NC_005835.1	807118	808249	TT_RS04175	+
NC_005835.1	1456996	1457031	77.7466	6.01955	-	NC_005835.1	1454320	1457167	TT_RS07725	-
NC_005835.1	1882758	1882848	12.2052	6.01888	+	NC_005835.1	1882311	1882998	TT_RS10060	+
NC_005835.1	165459	165495	39.65	6.01697	+	NC_005835.1	165396	165594	TT_RS00935	+
NC_005838.1	5844	5905	35.3023	6.01308	+	NC_005838.1	5306	5969	TT_RS10170	+
NC_005835.1	286257	286332	32.0213	6.01307	+	NC_005835.1	285888	286575	TT_RS01520	+
NC_005835.1	1449089	1449131	10.2404	6.01107	+	NC_005835.1	1448466	1449345	TT_RS07700	+
NC_005835.1	1165704	1165775	41.053	6.00561	-	NC_005835.1	1165327	1165951	TT_RS06075	-
NC_005835.1	153661	153693	13.0962	6.0032	-	NC_005835.1	153180	154191	TT_RS00875	-
NC_005835.1	780091	780156	10.8772	6.00319	-	NC_005835.1	779892	780306	TT_RS04040	-
NC_005835.1	7754	7855	9.15806	6.00319	+	NC_005835.1	7548	8745	TT_RS00045	+
NC_005835.1	1559960	1560025	32.6509	5.99776	+	NC_005835.1	1559342	1560587	TT_RS08310	+
NC_005835.1	1724098	1724139	18.6525	5.99724	+	NC_005835.1	1723904	1724546	TT_RS09230	+
NC_005835.1	1044752	1044802	18.1949	5.99524	+	NC_005835.1	1043080	1045939	TT_RS05430	+
NC_005835.1	755417	755485	14.7446	5.99523	+	NC_005835.1	755074	756796	TT_RS03930	+
NC_005835.1	1364939	1364961	12.8112	5.99522	+	NC_005835.1	1364844	1365261	TT_RS07295	+
NC_005835.1	238574	238653	9.60944	5.99522	+	NC_005835.1	238271	238856	TT_RS01275	+
NC_005838.1	111271	111304	9.32293	5.99522	+	NC_005838.1	111139	111484	TT_RS10725	+
NC_005835.1	1615777	1615879	24.8152	5.99396	+	NC_005835.1	1614584	1615952	TT_RS08630	+
NC_005835.1	46472	46549	53.3769	5.99059	-	NC_005835.1	46401	46584	TT_RS00245	-
NC_005835.1	1043951	1044015	21.1366	5.9892	+	NC_005835.1	1043080	1045939	TT_RS05430	+
NC_005835.1	1604370	1604389	21.1366	5.9892	-	NC_005835.1	1604233	1605142	TT_RS08570	-
NC_005835.1	98082	98204	16.6136	5.98447	+	NC_005835.1	97644	98394	TT_RS00545	+
NC_005835.1	1497410	1497449	60.7891	5.98157	+	NC_005835.1	1497146	1497941	TT_RS07980	+
NC_005835.1	340262	340371	131.794	5.98084	+	NC_005835.1	339637	341689	TT_RS01800	+
NC_005835.1	991841	991923	39.9137	5.98009	+	NC_005835.1	991768	992902	TT_RS05125	+
NC_005835.1	1247664	1247715	15.2072	5.97902	-	NC_005835.1	1247413	1248049	TT_RS06525	-
NC_005835.1	1521078	1521144	14.116	5.97902	-	NC_005835.1	1520424	1521174	TT_RS08120	-
NC_005835.1	90338	90357	9.04053	5.97901	+	NC_005835.1	90229	91252	TT_RS00505	+
NC_005835.1	935686	935717	9.04053	5.97901	-	NC_005835.1	934888	936103	TT_RS04830	-
NC_005835.1	1838651	1838686	9.04053	5.97901	-	NC_005835.1	1834736	1840145	TT_RS09825	-
NC_005835.1	1484640	1484716	18.6014	5.97697	+	NC_005835.1	1484283	1485525	TT_RS07910	+
NC_005835.1	1286250	1286327	58.653	5.97527	+	NC_005835.1	1286127	1288344	TT_RS06835	+
NC_005835.1	1804083	1804170	56.1576	5.97496	+	NC_005835.1	1802866	1804420	TT_RS09640	+
NC_005835.1	1497667	1497712	72.4075	5.96919	+	NC_005835.1	1497146	1497941	TT_RS07980	+
NC_005835.1	1124682	1124734	16.6313	5.96523	-	NC_005835.1	1124474	1126082	TT_RS05850	-
NC_005835.1	1286958	1287000	17.5228	5.96453	+	NC_005835.1	1286127	1288344	TT_RS06835	+
NC_005835.1	960751	960802	12.5655	5.96452	-	NC_005835.1	960014	961751	TT_RS04935	-
NC_005835.1	1515264	1515324	30.1876	5.95826	-	NC_005835.1	1514845	1515340	TT_RS08085	-
NC_005835.1	94117	94191	21.32	5.95613	+	NC_005835.1	94043	94241	TT_RS00525	+
NC_005835.1	1801850	1801922	13.5854	5.95611	+	NC_005835.1	1801604	1802816	TT_RS09635	+
NC_005835.1	1173621	1173686	16.5505	5.94975	-	NC_005835.1	1172919	1174194	TT_RS06120	-
NC_005835.1	1192577	1192668	20.8849	5.94974	-	NC_005835.1	1191942	1193901	TT_RS06215	-
NC_005835.1	1704238	1704277	8.82327	5.94973	+	NC_005835.1	1703783	1704329	TT_RS09140	+
NC_005835.1	492540	492570	14.9111	5.94832	-	NC_005835.1	492348	492939	TT_RS02575	-
NC_005835.1	1144340	1144397	29.9629	5.94548	+	NC_005835.1	1144119	1145643	TT_RS11410	+
NC_005835.1	917613	917660	20.1134	5.94547	-	NC_005835.1	916654	917703	TT_RS04735	-
NC_005835.1	1166671	1166721	18.8428	5.94547	-	NC_005835.1	1165960	1166779	TT_RS06080	-
NC_005835.1	529218	529276	17.7865	5.94547	-	NC_005835.1	527786	530813	TT_RS02750	-
NC_005835.1	683051	683130	17.6155	5.94547	-	NC_005835.1	682700	683285	TT_RS03550	-
NC_005835.1	1726848	1726868	15.0455	5.94546	-	NC_005835.1	1726570	1727140	TT_RS09250	-
NC_005835.1	359184	359285	13.1242	5.94546	+	NC_005835.1	358285	359431	TT_RS01890	+
NC_005835.1	875156	875248	12.9729	5.94546	+	NC_005835.1	874714	876487	TT_RS04535	+
NC_005835.1	846055	846119	12.2309	5.94546	+	NC_005835.1	846030	847698	TT_RS04410	+
NC_005835.1	809622	809664	10.1947	5.94545	+	NC_005835.1	809583	810042	TT_RS04190	+
NC_005835.1	1767796	1767853	10.1947	5.94545	-	NC_005835.1	1767169	1767877	TT_RS09475	-
NC_005835.1	1702601	1702670	9.56002	5.94545	+	NC_005835.1	1702395	1703280	TT_RS09130	+
NC_005835.1	1665016	1665088	24.2008	5.94289	-	NC_005835.1	1664233	1665589	TT_RS08925	-
NC_005835.1	43393	43431	14.7817	5.93971	-	NC_005835.1	43346	43589	TT_RS00225	-
NC_005835.1	445579	445616	20.0567	5.93575	+	NC_005835.1	445058	445913	TT_RS02325	+
NC_005835.1	1267294	1267452	89.0265	5.93539	-	NC_005835.1	1266965	1268186	TT_RS06710	-
NC_005835.1	1304886	1305047	17.4282	5.93515	+	NC_005835.1	1304657	1305074	TT_RS06935	+
NC_005835.1	19214	19260	15.35	5.93247	+	NC_005835.1	18924	19868	TT_RS00105	+
NC_005835.1	1833951	1834022	12.2251	5.93246	-	NC_005835.1	1833237	1834032	TT_RS09815	-
NC_005835.1	421505	421583	8.70398	5.93245	-	NC_005835.1	421446	422841	TT_RS02195	-
NC_005835.1	1118682	1118736	14.7418	5.931	+	NC_005835.1	1118537	1119221	TT_RS05825	+
NC_005835.1	23268	23512	25.4477	5.92702	-	NC_005835.1	22905	23895	TT_RS00130	-
NC_005835.1	756423	756601	30.7212	5.92406	+	NC_005835.1	755074	756796	TT_RS03930	+
NC_005835.1	1308463	1308574	38.266	5.92271	-	NC_005835.1	1307595	1308600	TT_RS06960	-
NC_005835.1	1805712	1805776	12.366	5.92145	+	NC_005835.1	1804669	1806625	TT_RS09650	+
NC_005838.1	17681	17738	12.4799	5.92145	+	NC_005838.1	16675	17683	TT_RS10245	+
NC_005838.1	17681	17738	12.4799	5.92145	+	NC_005838.1	17679	17901	TT_RS10250	+
NC_005835.1	1437625	1437680	32.6743	5.91926	-	NC_005835.1	1436788	1437976	TT_RS07640	-
NC_005835.1	588994	589028	23.0923	5.91924	-	NC_005835.1	588788	589301	TT_RS03070	-
NC_005835.1	1152969	1153072	19.8561	5.91924	+	NC_005835.1	1152650	1154162	TT_RS06000	+
NC_005835.1	555861	555885	12.6382	5.91922	+	NC_005835.1	555834	556868	TT_RS11370	+
NC_005835.1	1397929	1397977	8.93187	5.91922	-	NC_005835.1	1397505	1398219	TT_RS07450	-
NC_005835.1	1519737	1519818	24.5753	5.91878	-	NC_005835.1	1519681	1520431	TT_RS08115	-
NC_005835.1	1200787	1200821	16.852	5.91476	+	NC_005835.1	1200578	1200845	TT_RS06265	+
NC_005835.1	1190901	1190940	9.854	5.91475	-	NC_005835.1	1190022	1191327	TT_RS06205	-
NC_005835.1	962122	962183	11.8362	5.91391	-	NC_005835.1	961811	962945	TT_RS04940	-
NC_005835.1	1650668	1650846	97.3332	5.91212	+	NC_005835.1	1649912	1651133	TT_RS08820	+
NC_005835.1	1681186	1681227	69.4525	5.91124	+	NC_005835.1	1681160	1681592	TT_RS09025	+
NC_005835.1	708347	708393	22.0324	5.91028	+	NC_005835.1	707820	709056	TT_RS03675	+
NC_005835.1	1651530	1651570	14.8774	5.91027	+	NC_005835.1	1651520	1652075	TT_RS08835	+
NC_005835.1	1171673	1171720	13.7403	5.91026	-	NC_005835.1	1171516	1172408	TT_RS06110	-
NC_005835.1	226647	226693	13.088	5.90801	-	NC_005835.1	226574	227150	TT_RS01210	-
NC_005835.1	146153	146249	27.1974	5.90179	-	NC_005835.1	146029	147157	TT_RS00840	-
NC_005835.1	408054	408091	24.833	5.89969	-	NC_005835.1	405922	408310	TT_RS02120	-
NC_005835.1	1631219	1631283	63.5307	5.89897	+	NC_005835.1	1630034	1631666	TT_RS08700	+
NC_005835.1	1371303	1371393	26.8053	5.89893	+	NC_005835.1	1370909	1371599	TT_RS07325	+
NC_005835.1	1174542	1174634	14.338	5.89791	-	NC_005835.1	1174203	1175463	TT_RS06125	-
NC_005835.1	334943	335014	8.42774	5.89199	-	NC_005835.1	334861	336025	TT_RS01775	-
NC_005835.1	1762349	1762434	28.5843	5.88797	+	NC_005835.1	1761389	1763210	TT_RS09445	+
NC_005835.1	1723192	1723279	11.8263	5.88736	-	NC_005835.1	1723104	1723890	TT_RS09225	-
NC_005835.1	1684447	1684584	11.1846	5.88623	-	NC_005835.1	1683879	1685232	TT_RS09045	-
NC_005835.1	853807	853895	28.9491	5.88584	-	NC_005835.1	853240	854044	TT_RS04450	-
NC_005838.1	86401	86491	27.1189	5.88447	+	NC_005838.1	86007	86697	TT_RS10595	+
NC_005835.1	1413736	1413761	16.4326	5.8827	+	NC_005835.1	1412981	1414388	TT_RS07520	+
NC_005835.1	1679936	1679959	11.7657	5.88269	+	NC_005835.1	1678762	1680331	TT_RS09015	+
NC_005835.1	680668	680708	9.51363	5.88269	-	NC_005835.1	679332	681453	TT_RS03540	-
NC_005835.1	1338340	1338369	9.51363	5.88269	-	NC_005835.1	1338060	1339332	TT_RS07125	-
NC_005835.1	851975	852011	8.55369	5.88268	-	NC_005835.1	851928	853008	TT_RS04440	-
NC_005835.1	1090811	1090852	8.36825	5.88268	-	NC_005835.1	1089863	1092428	TT_RS05675	-
NC_005835.1	232095	232191	35.8203	5.87981	-	NC_005835.1	231976	232840	TT_RS01240	-
NC_005835.1	41914	41990	21.2007	5.87958	-	NC_005835.1	40870	42001	TT_RS00215	-
NC_005835.1	1206608	1206684	21.7613	5.87867	-	NC_005835.1	1206580	1207108	TT_RS06310	-
NC_005835.1	959830	959939	14.1719	5.878	-	NC_005835.1	958215	960018	TT_RS04930	-
NC_005835.1	1257271	1257339	23.3938	5.87683	-	NC_005835.1	1256685	1258002	TT_RS06600	-
NC_005835.1	1476889	1476975	11.7451	5.87326	-	NC_005835.1	1476144	1477122	TT_RS07845	-
NC_005835.1	1612245	1612283	11.5718	5.87326	+	NC_005835.1	1610661	1613352	TT_RS08620	+
NC_005835.1	394799	394871	9.56139	5.87326	-	NC_005835.1	393960	394872	TT_RS02060	-
NC_005835.1	1726983	1727025	28.1217	5.87171	-	NC_005835.1	1726570	1727140	TT_RS09250	-
NC_005835.1	1544170	1544317	16.9553	5.86802	-	NC_005835.1	1541857	1544527	TT_RS08215	-
NC_005835.1	995660	995735	47.5087	5.86376	+	NC_005835.1	994960	997234	TT_RS05145	+
NC_005838.1	57809	57898	25.7773	5.86373	-	NC_005838.1	57604	58294	TT_RS10455	-
NC_005838.1	160682	160771	25.7773	5.86373	+	NC_005838.1	160288	160978	TT_RS10910	+
NC_005835.1	1224633	1224673	19.8203	5.86372	-	NC_005835.1	1223976	1225845	TT_RS06415	-
NC_005835.1	1100904	1100950	16.3449	5.86371	-	NC_005835.1	1100716	1101592	TT_RS05720	-
NC_005838.1	96873	96922	12.0992	5.86371	+	NC_005838.1	96350	97226	TT_RS10660	+
NC_005835.1	807424	807495	11.5456	5.86371	+	NC_005835.1	807118	808249	TT_RS04175	+
NC_005835.1	852447	852508	11.5456	5.86371	-	NC_005835.1	851928	853008	TT_RS04440	-
NC_005835.1	1762129	1762165	11.5456	5.86371	+	NC_005835.1	1761389	1763210	TT_RS09445	+
NC_005835.1	459641	459692	8.31117	5.8637	-	NC_005835.1	459455	460400	TT_RS02390	-
NC_005835.1	1528328	1528359	8.31117	5.8637	+	NC_005835.1	1527076	1528501	TT_RS08145	+
NC_005835.1	1700986	1701023	8.31117	5.8637	-	NC_005835.1	1700338	1701547	TT_RS09120	-
NC_005835.1	1120271	1120295	11.7981	5.8613	+	NC_005835.1	1119930	1122108	TT_RS05835	+
NC_005835.1	1345842	1345918	54.1019	5.86051	-	NC_005835.1	1345789	1347040	TT_RS07175	-
NC_005835.1	338964	339005	14.6216	5.8605	+	NC_005835.1	338360	339254	TT_RS01790	+
NC_005835.1	1730997	1731104	79.8426	5.859	+	NC_005835.1	1729688	1731299	TT_RS09280	+
NC_005835.1	383133	383182	12.4038	5.85646	+	NC_005835.1	382963	383701	TT_RS02000	+
NC_005835.1	1480611	1480675	14.7163	5.85403	-	NC_005835.1	1479856	1481035	TT_RS07875	-
NC_005835.1	1442364	1442422	25.935	5.85079	-	NC_005835.1	1442114	1442495	TT_RS07665	-
NC_005835.1	1292459	1292583	28.8262	5.84917	+	NC_005835.1	1291242	1293639	TT_RS06855	+
NC_005835.1	891575	891623	16.0927	5.84914	-	NC_005835.1	891545	892112	TT_RS04605	-
NC_005835.1	205064	205157	9.17365	5.84913	-	NC_005835.1	204863	205613	TT_RS01105	-
NC_005835.1	122679	122809	31.6274	5.84753	-	NC_005835.1	121902	123012	TT_RS00705	-
NC_005835.1	1760599	1760634	27.9445	5.84753	-	NC_005835.1	1759751	1761029	TT_RS09435	-
NC_005835.1	1505310	1505449	10.6507	5.84596	+	NC_005835.1	1504999	1506853	TT_RS08045	+
NC_005835.1	1392014	1392062	26.2901	5.84225	-	NC_005835.1	1391456	1392641	TT_RS07420	-
NC_005835.1	1316224	1316408	11.3508	5.83998	-	NC_005835.1	1316187	1317186	TT_RS07015	-
NC_005835.1	1663587	1663634	19.4913	5.83927	-	NC_005835.1	1662837	1664232	TT_RS08920	-
NC_005838.1	10599	10734	34.5138	5.83763	+	NC_005838.1	10381	11245	TT_RS10200	+
NC_005835.1	1402865	1402909	11.3037	5.83676	-	NC_005835.1	1401660	1404309	TT_RS07480	-
NC_005835.1	237141	237252	59.6533	5.83655	+	NC_005835.1	236991	238206	TT_RS01270	+
NC_005835.1	194768	194864	10.4534	5.83537	-	NC_005835.1	194178	195168	TT_RS01055	-
NC_005835.1	1647667	1647694	19.5858	5.83427	+	NC_005835.1	1647594	1647879	TT_RS08785	+
NC_005835.1	707599	707646	19.6287	5.83427	+	NC_005835.1	707239	707824	TT_RS03670	+
NC_005835.1	839963	840034	19.2891	5.83427	-	NC_005835.1	839817	840831	TT_RS04370	-
NC_005835.1	1345564	1345581	11.6375	5.83426	-	NC_005835.1	1345228	1345789	TT_RS07170	-
NC_005835.1	713997	714074	11.3552	5.83426	-	NC_005835.1	713753	715010	TT_RS03710	-
NC_005835.1	1746480	1746515	11.3552	5.83426	+	NC_005835.1	1746403	1746832	TT_RS09350	+
NC_005835.1	1277860	1277949	9.81165	5.83425	-	NC_005835.1	1277646	1278312	TT_RS06775	-
NC_005835.1	224035	224064	8.54291	5.83425	-	NC_005835.1	223332	224958	TT_RS01195	-
NC_005835.1	14895	14951	8.25665	5.83425	+	NC_005835.1	14606	15446	TT_RS00080	+
NC_005835.1	1827425	1827469	8.25665	5.83425	-	NC_005835.1	1826260	1827490	TT_RS09760	-
NC_005835.1	1250973	1251026	8.09402	5.83425	-	NC_005835.1	1250741	1251575	TT_RS06545	-
NC_005835.1	1654628	1654663	38.9764	5.83208	+	NC_005835.1	1654614	1654881	TT_RS08865	+
NC_005835.1	1040667	1040704	8.15708	5.82922	+	NC_005835.1	1040665	1041316	TT_RS05415	+
NC_005835.1	1028021	1028098	8.03346	5.82922	-	NC_005835.1	1027640	1028102	TT_RS05340	-
NC_005835.1	165661	165735	51.0624	5.82422	+	NC_005835.1	165605	165962	TT_RS00940	+
NC_005835.1	1344590	1344690	57.772	5.82164	-	NC_005835.1	1343611	1344709	TT_RS07160	-
NC_005835.1	1840948	1841078	39.0771	5.8213	+	NC_005835.1	1840329	1842804	TT_RS09830	+
NC_005835.1	702650	702700	17.4389	5.81908	+	NC_005835.1	701793	703047	TT_RS03645	+
NC_005835.1	374837	374954	36.1389	5.81527	-	NC_005835.1	374161	376087	TT_RS01960	-
NC_005838.1	99677	99752	16.1846	5.81523	+	NC_005838.1	98387	99782	TT_RS10670	+
NC_005835.1	33468	33513	42.2175	5.81398	+	NC_005835.1	32843	34217	TT_RS00175	+
NC_005835.1	466557	466648	26.5372	5.81397	-	NC_005835.1	465263	466883	TT_RS02420	-
NC_005835.1	1146129	1146207	22.0432	5.81396	-	NC_005835.1	1145784	1146225	TT_RS05955	-
NC_005835.1	1380187	1380233	16.3744	5.81395	-	NC_005835.1	1377887	1382462	TT_RS07380	-
NC_005838.1	6092	6125	13.4195	5.81394	+	NC_005838.1	5965	7066	TT_RS10175	+
NC_005838.1	97210	97270	12.3701	5.81394	+	NC_005838.1	96350	97226	TT_RS10660	+
NC_005838.1	97210	97270	12.3701	5.81394	+	NC_005838.1	97183	98377	TT_RS10665	+
NC_005835.1	1396795	1396846	11.1049	5.81394	-	NC_005835.1	1396411	1397497	TT_RS07445	-
NC_005835.1	1317691	1317751	8.83412	5.81393	-	NC_005835.1	1317194	1318217	TT_RS07020	-
NC_005835.1	1109933	1109999	7.97544	5.81393	+	NC_005835.1	1108702	1110109	TT_RS05755	+
NC_005835.1	1866206	1866268	24.3503	5.80706	+	NC_005835.1	1865578	1866871	TT_RS09980	+
NC_005835.1	464150	464239	21.8809	5.80705	+	NC_005835.1	464088	464535	TT_RS02410	+
NC_005835.1	591979	592014	14.0397	5.80704	-	NC_005835.1	591471	592083	TT_RS03090	-
NC_005835.1	721456	721527	30.7209	5.80358	-	NC_005835.1	720725	721655	TT_RS03735	-
NC_005835.1	1452232	1452321	20.4199	5.80358	-	NC_005835.1	1452219	1454220	TT_RS07720	-
NC_005835.1	1231817	1231951	13.554	5.80356	+	NC_005835.1	1231796	1232879	TT_RS06450	+
NC_005835.1	915672	915733	11.5762	5.80094	-	NC_005835.1	914679	915819	TT_RS04725	-
NC_005835.1	587259	587356	76.2209	5.79735	-	NC_005835.1	586767	588774	TT_RS03065	-
NC_005835.1	1745290	1745337	15.7063	5.79568	+	NC_005835.1	1744979	1746419	TT_RS09345	+
NC_005835.1	490840	490940	15.0403	5.79568	-	NC_005835.1	490156	490981	TT_RS02560	-
NC_005835.1	1611821	1611863	11.5207	5.79567	+	NC_005835.1	1610661	1613352	TT_RS08620	+
NC_005835.1	1604057	1604103	14.8637	5.79303	-	NC_005835.1	1604034	1604247	TT_RS08565	-
NC_005835.1	1635354	1635436	13.4231	5.79303	+	NC_005835.1	1634946	1635867	TT_RS08720	+
NC_005835.1	839038	839103	8.20498	5.79302	-	NC_005835.1	838584	839142	TT_RS04360	-
NC_005835.1	1376922	1377004	18.7655	5.7895	-	NC_005835.1	1376155	1377016	TT_RS07365	-
NC_005835.1	1376922	1377004	18.7655	5.7895	-	NC_005835.1	1376985	1377225	TT_RS07370	-
NC_005835.1	1503656	1503752	21.9538	5.78772	+	NC_005835.1	1502603	1504193	TT_RS08030	+
NC_005835.1	1741218	1741298	16.4236	5.78771	+	NC_005835.1	1741012	1741972	TT_RS09325	+
NC_005838.1	12092	12149	12.6822	5.78771	+	NC_005838.1	11237	12317	TT_RS10205	+
NC_005835.1	45755	45801	12.0281	5.7877	-	NC_005835.1	45268	46237	TT_RS00240	-
NC_005835.1	504200	504262	11.8511	5.7877	-	NC_005835.1	503268	504534	TT_RS02635	-
NC_005835.1	1525278	1525351	11.0656	5.7877	+	NC_005835.1	1524641	1525769	TT_RS08135	+
NC_005835.1	1494668	1494706	7.9201	5.7877	-	NC_005835.1	1494279	1495443	TT_RS07965	-
NC_005835.1	1511211	1511330	21.0042	5.78679	+	NC_005835.1	1510172	1512530	TT_RS08065	+
NC_005835.1	1543466	1543544	24.5928	5.78476	-	NC_005835.1	1541857	1544527	TT_RS08215	-
NC_005835.1	1123938	1124064	43.6117	5.78081	-	NC_005835.1	1123477	1124398	TT_RS05845	-
NC_005835.1	1666201	1666269	15.7018	5.77875	-	NC_005835.1	1666047	1667022	TT_RS08935	-
NC_005835.1	463000	463177	55.9311	5.777	-	NC_005835.1	460855	463459	TT_RS02400	-
NC_005835.1	847216	847327	22.8431	5.77696	+	NC_005835.1	846030	847698	TT_RS04410	+
NC_005835.1	1093761	1093808	13.1236	5.77694	-	NC_005835.1	1093648	1094182	TT_RS05690	-
NC_005835.1	188847	188899	10.822	5.77694	+	NC_005835.1	188599	189658	TT_RS01025	+
NC_005835.1	905810	905857	10.822	5.77694	-	NC_005835.1	905328	906447	TT_RS04670	-
NC_005835.1	975921	975963	10.822	5.77694	+	NC_005835.1	975806	976454	TT_RS05025	+
NC_005835.1	1553947	1553988	8.49507	5.77693	+	NC_005835.1	1553697	1554834	TT_RS08270	+
NC_005835.1	1269010	1269078	25.9375	5.7747	-	NC_005835.1	1268243	1270319	TT_RS06715	-
NC_005835.1	1516415	1516509	20.3018	5.77424	+	NC_005835.1	1515963	1516590	TT_RS08095	+
NC_005838.1	73183	73242	35.4529	5.77153	+	NC_005838.1	72919	73609	TT_RS10530	+
NC_005835.1	1133568	1133620	15.7971	5.7715	-	NC_005835.1	1132566	1133637	TT_RS05895	-
NC_005835.1	1681939	1681993	13.169	5.7715	+	NC_005835.1	1681613	1682729	TT_RS09030	+
NC_005835.1	553499	553595	13.0859	5.7715	-	NC_005835.1	553194	554175	TT_RS02880	-
NC_005835.1	797581	797615	13.3422	5.7715	-	NC_005835.1	797075	797921	TT_RS04115	-
NC_005835.1	1072843	1072927	11.3797	5.77149	+	NC_005835.1	1071778	1076257	TT_RS05580	+
NC_005835.1	125260	125316	10.9736	5.77149	-	NC_005835.1	124839	125376	TT_RS00725	-
NC_005835.1	289565	289656	10.9736	5.77149	-	NC_005835.1	288793	289993	TT_RS01540	-
NC_005838.1	96688	96718	10.9736	5.77149	+	NC_005838.1	96350	97226	TT_RS10660	+
NC_005838.1	92053	92076	10.9736	5.77149	-	NC_005838.1	91070	92104	TT_RS11505	-
NC_005835.1	1397261	1397293	7.69974	5.77149	-	NC_005835.1	1396411	1397497	TT_RS07445	-
NC_005835.1	1691027	1691101	7.69974	5.77149	+	NC_005835.1	1690781	1692266	TT_RS09080	+
NC_005835.1	1720958	1721091	28.1025	5.76742	-	NC_005835.1	1720850	1721903	TT_RS09215	-
NC_005835.1	1647610	1647627	16.0109	5.76739	+	NC_005835.1	1647594	1647879	TT_RS08785	+
NC_005835.1	1413265	1413299	18.3684	5.76418	+	NC_005835.1	1412981	1414388	TT_RS07520	+
NC_005835.1	1644141	1644216	19.9602	5.7605	-	NC_005835.1	1643547	1644651	TT_RS08765	-
NC_005835.1	894074	894123	18.9734	5.76049	-	NC_005835.1	892485	894444	TT_RS04615	-
NC_005835.1	20159	20214	10.1153	5.76048	+	NC_005835.1	19891	21529	TT_RS00110	+
NC_005835.1	47341	47415	10.1153	5.76048	-	NC_005835.1	47268	47748	TT_RS00255	-
NC_005835.1	1651189	1651237	7.82605	5.76047	+	NC_005835.1	1651177	1651342	TT_RS08825	+
NC_005835.1	1489776	1489846	23.9169	5.75803	-	NC_005835.1	1489376	1490108	TT_RS07940	-
NC_005835.1	782103	782148	14.0503	5.75771	+	NC_005835.1	781772	782480	TT_RS04055	+
NC_005835.1	1248582	1248662	85.8478	5.75689	-	NC_005835.1	1248045	1248816	TT_RS06530	-
NC_005835.1	438391	438465	61.5592	5.75418	-	NC_005835.1	438009	438546	TT_RS02280	-
NC_005835.1	1762923	1762977	21.9073	5.75119	+	NC_005835.1	1761389	1763210	TT_RS09445	+
NC_005835.1	1200451	1200476	14.4291	5.75118	+	NC_005835.1	1200243	1200582	TT_RS06260	+
NC_005838.1	97299	97371	14.4291	5.75118	+	NC_005838.1	97183	98377	TT_RS10665	+
NC_005835.1	1465938	1465986	14.7371	5.75071	-	NC_005835.1	1465603	1466413	TT_RS07775	-
NC_005835.1	355167	355220	28.5599	5.74932	+	NC_005835.1	354832	356071	TT_RS01875	+
NC_005835.1	880035	880106	12.9991	5.7493	-	NC_005835.1	879811	881032	TT_RS04555	-
NC_005835.1	178908	178957	19.6189	5.74649	+	NC_005835.1	177672	179184	TT_RS01005	+
NC_005835.1	1265149	1265204	16.9232	5.74648	-	NC_005835.1	1265106	1265397	TT_RS06690	-
NC_005835.1	660543	660612	10.5301	5.74647	-	NC_005835.1	660328	661984	TT_RS03445	-
NC_005835.1	297150	297202	51.0351	5.74586	-	NC_005835.1	296983	297724	TT_RS01575	-
NC_005835.1	1247758	1247797	12.7037	5.74175	-	NC_005835.1	1247413	1248049	TT_RS06525	-
NC_005835.1	1268336	1268390	28.9318	5.74082	-	NC_005835.1	1268243	1270319	TT_RS06715	-
NC_005835.1	917292	917356	25.8562	5.74082	-	NC_005835.1	916654	917703	TT_RS04735	-
NC_005835.1	839550	839597	11.0389	5.74079	-	NC_005835.1	839164	839821	TT_RS04365	-
NC_005835.1	1342646	1342677	11.0389	5.74079	-	NC_005835.1	1342075	1342906	TT_RS07145	-
NC_005835.1	814212	814267	27.6415	5.73797	-	NC_005835.1	813776	814451	TT_RS04220	-
NC_005835.1	1761281	1761310	14.5684	5.73794	+	NC_005835.1	1761146	1761380	TT_RS09440	+
NC_005835.1	875662	875732	14.0085	5.73794	+	NC_005835.1	874714	876487	TT_RS04535	+
NC_005835.1	9139	9261	11.7947	5.73794	+	NC_005835.1	8791	9928	TT_RS00050	+
NC_005835.1	1873714	1873746	10.4834	5.73793	-	NC_005835.1	1873670	1874621	TT_RS10020	-
NC_005835.1	484034	484085	9.71758	5.73793	+	NC_005835.1	484024	484468	TT_RS02520	+
NC_005835.1	14395	14447	8.79056	5.73793	+	NC_005835.1	14349	14607	TT_RS00075	+
NC_005835.1	571583	571619	8.15655	5.73793	+	NC_005835.1	571561	572341	TT_RS02990	+
NC_005835.1	1185295	1185353	8.15655	5.73793	+	NC_005835.1	1184757	1186662	TT_RS06175	+
NC_005835.1	1717461	1717499	7.58437	5.73793	+	NC_005835.1	1712093	1718297	TT_RS09185	+
NC_005835.1	1844646	1844687	7.58437	5.73793	-	NC_005835.1	1844249	1844924	TT_RS09845	-
NC_005835.1	1817868	1817963	9.69522	5.7377	-	NC_005835.1	1817756	1819577	TT_RS09720	-
NC_005835.1	708643	708669	19.7282	5.7368	+	NC_005835.1	707820	709056	TT_RS03675	+
NC_005835.1	1084460	1084513	13.5163	5.73603	-	NC_005835.1	1084328	1084802	TT_RS05625	-
NC_005835.1	1135022	1135099	14.0973	5.73027	-	NC_005835.1	1133651	1135364	TT_RS05900	-
NC_005835.1	24494	24538	12.4126	5.7264	-	NC_005835.1	23891	26366	TT_RS00135	-
NC_005835.1	281225	281373	26.8238	5.72409	-	NC_005835.1	280583	281957	TT_RS01485	-
NC_005835.1	60783	60818	14.6143	5.72349	-	NC_005835.1	60533	60974	TT_RS00340	-
NC_005835.1	1366722	1366746	24.1438	5.72277	+	NC_005835.1	1366478	1367783	TT_RS07305	+
NC_005835.1	765554	765598	16.0569	5.72174	-	NC_005835.1	765537	765999	TT_RS03965	-
NC_005835.1	1855414	1855499	16.1919	5.72056	-	NC_005835.1	1854934	1855837	TT_RS09915	-
NC_005835.1	132643	132712	22.3296	5.71862	+	NC_005835.1	132536	133853	TT_RS00765	+
NC_005835.1	219957	220033	13.3743	5.71762	-	NC_005835.1	219772	220798	TT_RS01175	-
NC_005838.1	3810	3887	13.6649	5.71762	-	NC_005838.1	3474	4482	TT_RS10160	-
NC_005835.1	564384	564442	13.2679	5.7147	-	NC_005835.1	564034	564787	TT_RS02950	-
NC_005835.1	1499824	1499888	19.1913	5.71369	+	NC_005835.1	1499806	1500403	TT_RS08005	+
NC_005835.1	1727944	1728019	14.4593	5.70873	+	NC_005835.1	1727938	1728421	TT_RS09260	+
NC_005838.1	109625	109672	14.4593	5.70873	+	NC_005838.1	109072	110260	TT_RS10715	+
NC_005835.1	45943	45985	7.36726	5.70872	-	NC_005835.1	45268	46237	TT_RS00240	-
NC_005835.1	775230	775269	7.36726	5.70872	+	NC_005835.1	774942	775887	TT_RS04015	+
NC_005835.1	1574347	1574467	83.037	5.70654	+	NC_005835.1	1573768	1574494	TT_RS08410	+
NC_005835.1	430550	430660	17.1384	5.70508	+	NC_005835.1	429959	431315	TT_RS02245	+
NC_005835.1	1456720	1456919	102.631	5.70501	-	NC_005835.1	1454320	1457167	TT_RS07725	-
NC_005835.1	95192	95276	12.3841	5.70474	+	NC_005835.1	94242	95208	TT_RS00530	+
NC_005835.1	95192	95276	12.3841	5.70474	+	NC_005835.1	95114	95420	TT_RS11305	+
NC_005835.1	973419	973533	24.7748	5.70277	+	NC_005835.1	971722	974140	TT_RS05000	+
NC_005835.1	1480750	1480815	14.3685	5.70275	-	NC_005835.1	1479856	1481035	TT_RS07875	-
NC_005835.1	918777	918798	14.3387	5.70275	-	NC_005835.1	917699	919169	TT_RS04740	-
NC_005835.1	1683260	1683294	14.3387	5.70275	-	NC_005835.1	1683169	1683691	TT_RS09040	-
NC_005835.1	1494874	1494942	12.4024	5.70274	-	NC_005835.1	1494279	1495443	TT_RS07965	-
NC_005835.1	915373	915420	10.3975	5.70274	-	NC_005835.1	914679	915819	TT_RS04725	-
NC_005835.1	1112158	1112234	10.3127	5.70274	-	NC_005835.1	1111079	1112252	TT_RS05770	-
NC_005835.1	545253	545291	8.45103	5.70274	+	NC_005835.1	545109	545667	TT_RS02835	+
NC_005835.1	728884	728965	7.53114	5.70273	+	NC_005835.1	728646	729747	TT_RS03780	+
NC_005835.1	1139606	1139639	7.30693	5.70273	-	NC_005835.1	1139592	1141083	TT_RS05925	-
NC_005835.1	1254701	1254743	66.8653	5.69718	-	NC_005835.1	1254612	1254993	TT_RS06575	-
NC_005835.1	504588	504653	17.5846	5.69672	-	NC_005835.1	504536	504815	TT_RS02640	-
NC_005835.1	504357	504396	7.81861	5.6967	-	NC_005835.1	503268	504534	TT_RS02635	-
NC_005835.1	891101	891187	34.5429	5.69319	-	NC_005835.1	890570	891542	TT_RS04600	-
NC_005835.1	78594	78629	18.255	5.68757	+	NC_005835.1	78118	79402	TT_RS00435	+
NC_005835.1	1636205	1636292	8.20699	5.68703	-	NC_005835.1	1635820	1636618	TT_RS08725	-
NC_005835.1	26208	26263	14.682	5.68448	-	NC_005835.1	23891	26366	TT_RS00135	-
NC_005835.1	289410	289468	11.3139	5.68448	-	NC_005835.1	288793	289993	TT_RS01540	-
NC_005835.1	793693	793733	10.0511	5.68448	-	NC_005835.1	793514	794855	TT_RS04100	-
NC_005835.1	357752	357792	7.49675	5.68447	+	NC_005835.1	356873	358250	TT_RS01885	+
NC_005835.1	45447	45500	7.24958	5.68447	-	NC_005835.1	45268	46237	TT_RS00240	-
NC_005835.1	1670473	1670583	27.027	5.68245	-	NC_005835.1	1670430	1671477	TT_RS08965	-
NC_005835.1	1402349	1402413	20.4515	5.68244	-	NC_005835.1	1401660	1404309	TT_RS07480	-
NC_005835.1	1861595	1861630	11.7409	5.67829	-	NC_005835.1	1861230	1862085	TT_RS09950	-
NC_005835.1	1154187	1154227	10.5181	5.67204	+	NC_005835.1	1154158	1154725	TT_RS06005	+
NC_005835.1	149366	149444	19.5731	5.67049	-	NC_005835.1	149071	150055	TT_RS00855	-
NC_005835.1	1233406	1233460	55.5435	5.67	-	NC_005835.1	1232980	1234168	TT_RS06455	-
NC_005835.1	503434	503473	8.11198	5.66573	-	NC_005835.1	503268	504534	TT_RS02635	-
NC_005838.1	18628	18657	8.11198	5.66573	+	NC_005838.1	17887	19906	TT_RS10255	+
NC_005838.1	80007	80060	8.11198	5.66573	-	NC_005838.1	79826	80795	TT_RS10560	-
NC_005835.1	992125	992167	20.7643	5.65727	+	NC_005835.1	991768	992902	TT_RS05125	+
NC_005835.1	151241	151298	12.4904	5.65726	-	NC_005835.1	150932	152108	TT_RS00865	-
NC_005835.1	1451991	1452049	17.5742	5.6562	+	NC_005835.1	1451189	1452212	TT_RS07715	+
NC_005835.1	49036	49070	10.7923	5.65619	-	NC_005835.1	47771	49658	TT_RS00260	-
NC_005835.1	1252385	1252427	24.2938	5.653	-	NC_005835.1	1252217	1252574	TT_RS06555	-
NC_005835.1	251343	251400	15.5907	5.65298	+	NC_005835.1	250324	252901	TT_RS01330	+
NC_005835.1	849465	849524	12.6351	5.65298	-	NC_005835.1	849169	849949	TT_RS04425	-
NC_005835.1	58661	58743	9.9439	5.65297	+	NC_005835.1	58630	59116	TT_RS00325	+
NC_005835.1	491475	491535	8.03742	5.65297	-	NC_005835.1	491020	491578	TT_RS02565	-
NC_005835.1	1622635	1622690	7.48133	5.65297	-	NC_005835.1	1622498	1623434	TT_RS08670	-
NC_005835.1	653846	653882	30.7857	5.64725	+	NC_005835.1	653359	654217	TT_RS03390	+
NC_005835.1	918167	918194	23.5945	5.64409	-	NC_005835.1	917699	919169	TT_RS04740	-
NC_005838.1	15687	15780	20.1736	5.64326	+	NC_005838.1	15093	15942	TT_RS10230	+
NC_005835.1	866803	866909	14.4451	5.64325	-	NC_005835.1	866225	867197	TT_RS04495	-
NC_005835.1	191816	191906	9.95936	5.64324	+	NC_005835.1	190988	192404	TT_RS01040	+
NC_005835.1	538687	538815	27.053	5.64314	+	NC_005835.1	538448	540683	TT_RS02805	+
NC_005835.1	1451851	1451957	31.7937	5.64001	+	NC_005835.1	1451189	1452212	TT_RS07715	+
NC_005835.1	1891415	1891506	23.065	5.64	-	NC_005835.1	1890575	1891586	TT_RS10115	-
NC_005835.1	1742215	1742270	11.0765	5.63997	+	NC_005835.1	1742096	1743923	TT_RS09330	+
NC_005835.1	1058852	1058895	6.97445	5.63997	-	NC_005835.1	1058734	1060467	TT_RS05505	-
NC_005835.1	1744985	1745021	47.6654	5.63178	+	NC_005835.1	1744979	1746419	TT_RS09345	+
NC_005835.1	655826	655907	37.0676	5.63011	-	NC_005835.1	655731	656172	TT_RS03405	-
NC_005835.1	1503961	1504004	14.3531	5.63008	+	NC_005835.1	1502603	1504193	TT_RS08030	+
NC_005835.1	1839297	1839358	18.4791	5.62676	-	NC_005835.1	1834736	1840145	TT_RS09825	-
NC_005835.1	1013449	1013501	13.7823	5.62674	-	NC_005835.1	1012701	1014633	TT_RS05250	-
NC_005838.1	10782	10816	11.0711	5.62674	+	NC_005838.1	10381	11245	TT_RS10200	+
NC_005835.1	1518226	1518303	10.4594	5.62674	+	NC_005835.1	1516867	1518901	TT_RS08105	+
NC_005835.1	1189674	1189707	9.6556	5.62674	-	NC_005835.1	1189409	1189997	TT_RS06200	-
NC_005835.1	1741301	1741352	9.6556	5.62674	+	NC_005835.1	1741012	1741972	TT_RS09325	+
NC_005835.1	460716	460757	8.51488	5.62673	-	NC_005835.1	460411	460813	TT_RS02395	-
NC_005835.1	1189327	1189365	7.10121	5.62673	-	NC_005835.1	1188976	1189402	TT_RS06195	-
NC_005835.1	1297113	1297149	7.10121	5.62673	+	NC_005835.1	1297045	1297297	TT_RS06885	+
NC_005835.1	1126897	1126988	9.42951	5.62173	+	NC_005835.1	1126353	1127577	TT_RS05860	+
NC_005835.1	904540	904569	15.9639	5.62172	-	NC_005835.1	902447	905348	TT_RS04665	-
NC_005835.1	60163	60199	18.9596	5.61598	-	NC_005835.1	59619	60534	TT_RS00335	-
NC_005835.1	985224	985371	13.297	5.60642	-	NC_005835.1	985213	986296	TT_RS05080	-
NC_005835.1	390944	390981	11.4269	5.60642	+	NC_005835.1	390420	391995	TT_RS02045	+
NC_005835.1	801703	801741	11.9495	5.60642	-	NC_005835.1	801488	802223	TT_RS04140	-
NC_005838.1	207881	207916	9.52051	5.60642	-	NC_005838.1	207698	209327	TT_RS11160	-
NC_005835.1	772603	772668	8.41173	5.60641	-	NC_005835.1	771675	773049	TT_RS03995	-
NC_005835.1	1267467	1267564	59.3604	5.60507	-	NC_005835.1	1266965	1268186	TT_RS06710	-
NC_005835.1	844456	844514	19.943	5.60299	+	NC_005835.1	844236	844770	TT_RS04395	+
NC_005835.1	1539357	1539397	16.5641	5.60299	-	NC_005835.1	1539339	1540749	TT_RS08205	-
NC_005835.1	383041	383078	9.67997	5.60297	+	NC_005835.1	382963	383701	TT_RS02000	+
NC_005835.1	886704	886745	27.9245	5.59954	-	NC_005835.1	886375	887047	TT_RS04580	-
NC_005835.1	1587974	1588009	9.42544	5.59951	-	NC_005835.1	1586738	1588565	TT_RS08490	-
NC_005835.1	571394	571444	6.86063	5.59951	+	NC_005835.1	570389	571565	TT_RS02985	+
NC_005835.1	1556297	1556340	6.86063	5.59951	-	NC_005835.1	1556108	1556456	TT_RS08285	-
NC_005835.1	408227	408300	48.3409	5.5988	-	NC_005835.1	405922	408310	TT_RS02120	-
NC_005835.1	805542	805755	8.77918	5.59737	-	NC_005835.1	805285	806392	TT_RS04165	-
NC_005835.1	1309331	1309426	17.542	5.59605	-	NC_005835.1	1309159	1309933	TT_RS06970	-
NC_005835.1	753899	753964	16.0638	5.59605	+	NC_005835.1	752876	755018	TT_RS03925	+
NC_005835.1	938634	938708	10.127	5.59604	-	NC_005835.1	937413	939051	TT_RS04845	-
NC_005835.1	1134776	1134838	10.127	5.59604	-	NC_005835.1	1133651	1135364	TT_RS05900	-
NC_005835.1	28760	28865	13.1109	5.59488	-	NC_005835.1	28468	28885	TT_RS00150	-
NC_005835.1	463361	463428	13.1109	5.59488	-	NC_005835.1	460855	463459	TT_RS02400	-
NC_005835.1	994010	994060	27.3024	5.59433	+	NC_005835.1	993507	994089	TT_RS05135	+
NC_005835.1	1343393	1343454	26.2645	5.59199	-	NC_005835.1	1343263	1343605	TT_RS07155	-
NC_005835.1	1222052	1222101	14.4298	5.58975	-	NC_005835.1	1221705	1222882	TT_RS06405	-
NC_005835.1	1466827	1466992	38.8065	5.58735	-	NC_005835.1	1466444	1467479	TT_RS07780	-
NC_005835.1	799700	799754	16.6872	5.58552	-	NC_005835.1	799407	799893	TT_RS04130	-
NC_005835.1	374592	374633	14.6001	5.58552	-	NC_005835.1	374161	376087	TT_RS01960	-
NC_005835.1	1621312	1621389	9.32864	5.5855	-	NC_005835.1	1620844	1622476	TT_RS08665	-
NC_005835.1	158155	158196	8.11509	5.5855	+	NC_005835.1	157808	159329	TT_RS00890	+
NC_005838.1	72938	72985	27.0316	5.58318	+	NC_005838.1	72919	73609	TT_RS10530	+
NC_005835.1	528846	528943	22.7521	5.58317	-	NC_005835.1	527786	530813	TT_RS02750	-
NC_005835.1	1266541	1266604	13.2212	5.58197	-	NC_005835.1	1266022	1266643	TT_RS06700	-
NC_005838.1	165133	165159	13.6815	5.58197	+	NC_005838.1	165105	165669	TT_RS10935	+
NC_005835.1	409731	409822	34.8907	5.57923	-	NC_005835.1	409102	409849	TT_RS02130	-
NC_005835.1	1419803	1419911	13.9704	5.57662	+	NC_005835.1	1419651	1421915	TT_RS07555	+
NC_005835.1	189359	189417	11.1894	5.57122	+	NC_005835.1	188599	189658	TT_RS01025	+
NC_005835.1	218989	219029	9.6433	5.57122	-	NC_005835.1	218822	219776	TT_RS01170	-
NC_005835.1	778473	778573	9.6433	5.57122	+	NC_005835.1	777929	778664	TT_RS04025	+
NC_005835.1	437255	437340	40.2147	5.56819	-	NC_005835.1	437236	438010	TT_RS02275	-
NC_005835.1	1204442	1204530	12.1015	5.56398	+	NC_005835.1	1204110	1204566	TT_RS06285	+
NC_005835.1	960941	960979	9.34145	5.56397	-	NC_005835.1	960014	961751	TT_RS04935	-
NC_005835.1	1383654	1383699	9.34145	5.56397	-	NC_005835.1	1382491	1385851	TT_RS07385	-
NC_005835.1	719283	719314	6.58339	5.56396	+	NC_005835.1	719203	720694	TT_RS03730	+
NC_005835.1	1443018	1443049	6.58339	5.56396	-	NC_005835.1	1442485	1443349	TT_RS07670	-
NC_005835.1	978187	978257	28.6115	5.55669	+	NC_005835.1	977509	978763	TT_RS05040	+
NC_005835.1	531580	531648	18.1954	5.55666	-	NC_005835.1	531303	532458	TT_RS02760	-
NC_005835.1	656879	656925	11.2648	5.55665	-	NC_005835.1	656228	656948	TT_RS03410	-
NC_005835.1	1526682	1526757	11.2648	5.55665	+	NC_005835.1	1525821	1527090	TT_RS08140	+
NC_005835.1	59178	59199	6.80905	5.55664	-	NC_005835.1	59060	59486	TT_RS00330	-
NC_005835.1	1847153	1847206	6.80905	5.55664	+	NC_005835.1	1846658	1847639	TT_RS09865	+
NC_005835.1	1676788	1676917	19.095	5.55293	+	NC_005835.1	1676375	1677314	TT_RS09000	+
NC_005835.1	1274691	1274752	18.3145	5.5502	-	NC_005835.1	1273978	1275334	TT_RS06755	-
NC_005835.1	1229888	1230058	27.0563	5.54989	+	NC_005835.1	1229847	1231740	TT_RS06445	+
NC_005835.1	1745569	1745652	27.8573	5.54853	+	NC_005835.1	1744979	1746419	TT_RS09345	+
NC_005835.1	185424	185473	30.4698	5.54805	+	NC_005835.1	179497	187516	TT_RS01015	+
NC_005835.1	918221	918309	75.0763	5.54686	-	NC_005835.1	917699	919169	TT_RS04740	-
NC_005835.1	994527	994639	81.3386	5.54308	+	NC_005835.1	994085	994964	TT_RS05140	+
NC_005835.1	1567306	1567362	12.6513	5.54178	+	NC_005835.1	1566886	1567549	TT_RS08360	+
NC_005835.1	710274	710316	10.2627	5.54177	+	NC_005835.1	710140	710641	TT_RS03685	+
NC_005835.1	997829	997913	9.23812	5.54177	+	NC_005835.1	997292	998444	TT_RS05150	+
NC_005835.1	605153	605194	7.09824	5.54177	+	NC_005835.1	603938	605867	TT_RS03155	+
NC_005835.1	20104	20141	6.52691	5.54177	+	NC_005835.1	19891	21529	TT_RS00110	+
NC_005835.1	378654	378685	6.52691	5.54177	-	NC_005835.1	377770	379603	TT_RS01975	-
NC_005835.1	1543230	1543276	15.5506	5.54053	-	NC_005835.1	1541857	1544527	TT_RS08215	-
NC_005835.1	1699028	1699088	17.1966	5.53928	-	NC_005835.1	1698192	1699692	TT_RS09110	-
NC_005835.1	459208	459313	11.0093	5.53422	-	NC_005835.1	458689	459325	TT_RS02385	-
NC_005835.1	785490	785547	9.87233	5.53422	-	NC_005835.1	785300	787889	TT_RS04075	-
NC_005838.1	86279	86329	17.5558	5.53043	+	NC_005838.1	86007	86697	TT_RS10595	+
NC_005835.1	782183	782211	9.61032	5.53041	+	NC_005835.1	781772	782480	TT_RS04055	+
NC_005838.1	98412	98457	9.46459	5.53041	+	NC_005838.1	98387	99782	TT_RS10670	+
NC_005835.1	1371184	1371234	17.5093	5.52852	+	NC_005835.1	1370909	1371599	TT_RS07325	+
NC_005835.1	1808293	1808333	57.104	5.52852	-	NC_005835.1	1808313	1808390	TT_RS09670	-
NC_005835.1	1808293	1808333	57.104	5.52852	-	NC_005835.1	1807821	1808349	TT_RS09665	-
NC_005835.1	1334230	1334314	39.5954	5.52279	-	NC_005835.1	1333388	1334798	TT_RS07100	-
NC_005835.1	974873	974923	12.6389	5.52275	+	NC_005835.1	974869	975100	TT_RS05015	+
NC_005835.1	1869454	1869499	9.38622	5.52274	+	NC_005835.1	1869150	1869732	TT_RS10000	+
NC_005835.1	1062661	1062699	12.7554	5.51888	+	NC_005835.1	1062037	1063183	TT_RS05525	+
NC_005835.1	976520	976561	18.4344	5.51457	+	NC_005835.1	976463	976829	TT_RS05030	+
NC_005835.1	1461885	1461942	15.1509	5.50978	-	NC_005835.1	1461666	1462317	TT_RS07755	-
NC_005835.1	1575544	1575627	48.3493	5.50889	+	NC_005835.1	1575301	1575880	TT_RS08420	+
NC_005835.1	1652923	1652978	32.8128	5.50848	+	NC_005835.1	1652554	1653244	TT_RS08845	+
NC_005835.1	405806	405844	31.0462	5.50323	-	NC_005835.1	404916	405918	TT_RS02115	-
NC_005835.1	156792	156852	21.2081	5.50321	-	NC_005835.1	155469	157680	TT_RS00885	-
NC_005835.1	1012242	1012329	11.1028	5.50319	-	NC_005835.1	1012168	1012705	TT_RS05245	-
NC_005835.1	466104	466146	10.3506	5.50319	-	NC_005835.1	465263	466883	TT_RS02420	-
NC_005835.1	467939	467976	10.5812	5.50319	+	NC_005835.1	467126	469583	TT_RS02430	+
NC_005835.1	331442	331492	8.75316	5.50319	-	NC_005835.1	330327	332535	TT_RS01755	-
NC_005835.1	1139216	1139291	8.75132	5.50319	+	NC_005835.1	1137729	1139529	TT_RS05920	+
NC_005835.1	1202454	1202485	8.75132	5.50319	-	NC_005835.1	1200904	1202761	TT_RS06270	-
NC_005835.1	1362580	1362621	8.75132	5.50319	+	NC_005835.1	1362538	1362868	TT_RS07275	+
NC_005835.1	1178134	1178171	6.84485	5.50318	-	NC_005835.1	1177974	1178637	TT_RS06140	-
NC_005835.1	1321709	1321735	6.84485	5.50318	+	NC_005835.1	1321605	1321809	TT_RS07040	+
NC_005835.1	1707350	1707440	6.84485	5.50318	+	NC_005835.1	1706774	1709492	TT_RS09160	+
NC_005835.1	49962	50021	6.47426	5.50318	-	NC_005835.1	49667	50372	TT_RS00265	-
NC_005835.1	1426902	1426925	6.47426	5.50318	+	NC_005835.1	1426087	1427779	TT_RS07575	+
NC_005835.1	1770174	1770257	12.9245	5.50055	+	NC_005835.1	1769846	1770932	TT_RS09495	+
NC_005835.1	15630	15718	21.8988	5.49591	+	NC_005835.1	15447	16818	TT_RS00085	+
NC_005835.1	1433212	1433276	17.7735	5.49524	-	NC_005835.1	1432516	1433284	TT_RS07610	-
NC_005835.1	1120546	1120575	13.2535	5.49523	+	NC_005835.1	1119930	1122108	TT_RS05835	+
NC_005835.1	1698735	1698783	11.3976	5.49522	-	NC_005835.1	1698192	1699692	TT_RS09110	-
NC_005835.1	397793	397834	9.13459	5.49522	-	NC_005835.1	397618	398029	TT_RS02075	-
NC_005835.1	1373824	1373895	9.27078	5.49522	-	NC_005835.1	1373507	1374998	TT_RS07355	-
NC_005835.1	1777601	1777659	8.86851	5.49522	+	NC_005835.1	1777495	1778383	TT_RS09545	+
NC_005835.1	1647216	1647249	8.90543	5.49522	-	NC_005835.1	1647039	1647483	TT_RS08780	-
NC_005835.1	800852	800888	6.76169	5.49521	-	NC_005835.1	799954	801502	TT_RS04135	-
NC_005835.1	1883970	1884015	6.31412	5.49521	+	NC_005835.1	1883704	1884076	TT_RS10070	+
NC_005835.1	101719	101784	6.25236	5.49521	-	NC_005835.1	101663	102056	TT_RS00575	-
NC_005835.1	854472	854503	6.25236	5.49521	+	NC_005835.1	854427	854565	TT_RS04460	+
NC_005838.1	49964	50087	18.0314	5.49204	-	NC_005838.1	49236	50100	TT_RS10410	-
NC_005835.1	957892	958003	30.259	5.49122	-	NC_005835.1	957042	958215	TT_RS04925	-
NC_005835.1	1474210	1474289	14.884	5.48446	-	NC_005835.1	1473190	1474309	TT_RS07830	-
NC_005835.1	771347	771395	10.4781	5.48445	+	NC_005835.1	770448	771675	TT_RS03990	+
NC_005835.1	808724	808769	21.3711	5.48312	+	NC_005835.1	808224	808788	TT_RS04180	+
NC_005835.1	1128606	1128646	15.7686	5.47902	+	NC_005835.1	1127601	1129188	TT_RS05865	+
NC_005835.1	1488259	1488305	14.8036	5.47902	-	NC_005835.1	1488242	1488875	TT_RS07930	-
NC_005835.1	62661	62743	12.1177	5.47901	+	NC_005835.1	62451	63180	TT_RS00350	+
NC_005835.1	504864	504916	9.40648	5.47901	-	NC_005835.1	504816	505560	TT_RS02645	-
NC_005835.1	999879	999892	6.19443	5.479	+	NC_005835.1	999000	1000047	TT_RS05160	+
NC_005835.1	200191	200214	6.19443	5.479	+	NC_005835.1	199623	200682	TT_RS01080	+
NC_005835.1	524634	524698	6.19443	5.479	-	NC_005835.1	523311	524754	TT_RS02720	-
NC_005835.1	842205	842236	6.19443	5.479	+	NC_005835.1	841155	842574	TT_RS04380	+
NC_005835.1	132749	132817	15.0309	5.47765	+	NC_005835.1	132536	133853	TT_RS00765	+
NC_005838.1	160561	160611	16.887	5.47697	+	NC_005838.1	160288	160978	TT_RS10910	+
NC_005835.1	1531875	1531924	12.5505	5.47696	-	NC_005835.1	1530085	1531933	TT_RS08160	-
NC_005835.1	300661	300704	58.413	5.47651	-	NC_005835.1	299799	301557	TT_RS01595	-
NC_005838.1	57970	58029	16.7936	5.47491	-	NC_005838.1	57604	58294	TT_RS10455	-
NC_005838.1	7841	7871	11.9401	5.4749	+	NC_005838.1	7757	8969	TT_RS10185	+
NC_005835.1	1756011	1756059	12.9179	5.47077	+	NC_005835.1	1755862	1756534	TT_RS09410	+
NC_005835.1	737252	737399	12.0702	5.47077	-	NC_005835.1	736194	738180	TT_RS03815	-
NC_005835.1	681904	681995	10.9715	5.47077	-	NC_005835.1	681501	682701	TT_RS03545	-
NC_005835.1	551247	551342	11.3998	5.468	-	NC_005835.1	550218	551493	TT_RS02860	-
NC_005835.1	1322792	1322830	11.9659	5.45822	+	NC_005835.1	1322016	1323102	TT_RS07050	+
NC_005835.1	1533974	1534018	15.0926	5.45682	-	NC_005835.1	1533350	1534040	TT_RS08175	-
NC_005838.1	58228	58275	15.0926	5.45682	-	NC_005838.1	57604	58294	TT_RS10455	-
NC_005835.1	1336826	1336877	23.1998	5.45613	-	NC_005835.1	1336658	1337030	TT_RS07115	-
NC_005835.1	894515	894552	16.6659	5.45612	-	NC_005835.1	894440	894803	TT_RS04620	-
NC_005835.1	548065	548135	13.2112	5.45611	-	NC_005835.1	547709	549011	TT_RS02850	-
NC_005835.1	373886	373962	20.421	5.4554	-	NC_005835.1	373313	374165	TT_RS01955	-
NC_005835.1	80052	80113	7.05669	5.45398	+	NC_005835.1	80016	80790	TT_RS00445	+
NC_005835.1	1467627	1467675	16.3407	5.44975	-	NC_005835.1	1467471	1468317	TT_RS07785	-
NC_005835.1	309671	309737	36.2714	5.4493	-	NC_005835.1	308991	310161	TT_RS01645	-
NC_005835.1	1533715	1533767	16.603	5.44547	-	NC_005835.1	1533350	1534040	TT_RS08175	-
NC_005835.1	525549	525636	16.8893	5.44546	+	NC_005835.1	524790	525816	TT_RS02725	+
NC_005835.1	1122761	1122788	12.0109	5.44546	+	NC_005835.1	1122100	1123492	TT_RS05840	+
NC_005835.1	1338226	1338293	12.0959	5.44546	-	NC_005835.1	1338060	1339332	TT_RS07125	-
NC_005835.1	22689	22770	9.24162	5.44545	-	NC_005835.1	22217	22901	TT_RS00125	-
NC_005835.1	372512	372542	9.07564	5.44545	+	NC_005835.1	372280	372655	TT_RS01945	+
NC_005835.1	61256	61298	6.42596	5.44544	-	NC_005835.1	60990	62397	TT_RS00345	-
NC_005835.1	382676	382709	6.42596	5.44544	+	NC_005835.1	382591	382924	TT_RS01995	+
NC_005835.1	1186589	1186616	6.44931	5.44544	+	NC_005835.1	1184757	1186662	TT_RS06175	+
NC_005838.1	211274	211300	6.44931	5.44544	-	NC_005838.1	211117	211318	TT_RS11175	-
NC_005835.1	171267	171312	6.14054	5.44544	+	NC_005835.1	170972	172163	TT_RS00970	+
NC_005835.1	381652	381770	29.025	5.44263	+	NC_005835.1	380843	381872	TT_RS01985	+
NC_005835.1	987981	987990	188.346	5.44127	+	NC_005835.1	987922	987999	TT_RS05100	+
NC_005835.1	1883189	1883261	14.487	5.43899	+	NC_005835.1	1883006	1883678	TT_RS10065	+
NC_005835.1	1254111	1254149	44.0642	5.43782	-	NC_005835.1	1253544	1254174	TT_RS06565	-
NC_005835.1	244702	244803	19.7227	5.43703	+	NC_005835.1	241631	245189	TT_RS01290	+
NC_005835.1	1816269	1816313	12.8328	5.43508	-	NC_005835.1	1815073	1816357	TT_RS09710	-
NC_005835.1	255583	255618	14.6434	5.43392	-	NC_005835.1	255001	256252	TT_RS01365	-
NC_005838.1	86027	86070	14.7561	5.43392	+	NC_005838.1	86007	86697	TT_RS10595	+
NC_005835.1	1314560	1314622	56.5226	5.43252	-	NC_005835.1	1314283	1314661	TT_RS07000	-
NC_005835.1	1006807	1006927	42.716	5.4325	+	NC_005835.1	1006390	1007269	TT_RS05200	+
NC_005835.1	515281	515365	20.017	5.43247	+	NC_005835.1	514875	517812	TT_RS02700	+
NC_005835.1	1090745	1090796	8.58869	5.43245	-	NC_005835.1	1089863	1092428	TT_RS05675	-
NC_005835.1	351476	351539	8.32969	5.43245	-	NC_005835.1	351080	351950	TT_RS01850	-
NC_005835.1	174100	174253	25.3292	5.42746	-	NC_005835.1	172515	174984	TT_RS00980	-
NC_005835.1	1280697	1280776	5.95769	5.42742	-	NC_005835.1	1279604	1281029	TT_RS06795	-
NC_005835.1	1398049	1398108	10.5647	5.41922	-	NC_005835.1	1397505	1398219	TT_RS07450	-
NC_005835.1	1874222	1874258	11.6389	5.41699	-	NC_005835.1	1873670	1874621	TT_RS10020	-
NC_005835.1	1381201	1381270	20.4312	5.41627	-	NC_005835.1	1377887	1382462	TT_RS07380	-
NC_005835.1	910120	910182	20.6734	5.41477	+	NC_005835.1	909730	911050	TT_RS04700	+
NC_005835.1	1490050	1490090	14.0867	5.41476	-	NC_005835.1	1489376	1490108	TT_RS07940	-
NC_005835.1	1220537	1220700	31.197	5.41203	+	NC_005835.1	1219851	1220904	TT_RS06395	+
NC_005835.1	1650535	1650631	68.8206	5.41112	+	NC_005835.1	1649912	1651133	TT_RS08820	+
NC_005835.1	1637082	1637120	18.94	5.41028	-	NC_005835.1	1636618	1637404	TT_RS08730	-
NC_005835.1	1538123	1538190	18.0278	5.41027	-	NC_005835.1	1537703	1538336	TT_RS08195	-
NC_005835.1	1370927	1370974	14.4201	5.41027	+	NC_005835.1	1370909	1371599	TT_RS07325	+
NC_005838.1	160306	160351	14.4201	5.41027	+	NC_005838.1	160288	160978	TT_RS10910	+
NC_005835.1	1192699	1192731	12.0624	5.41026	-	NC_005835.1	1191942	1193901	TT_RS06215	-
NC_005835.1	188971	189000	8.90209	5.41026	+	NC_005835.1	188599	189658	TT_RS01025	+
NC_005835.1	692104	692122	6.71941	5.41025	+	NC_005835.1	691279	692134	TT_RS03580	+
NC_005835.1	1146472	1146574	6.71941	5.41025	-	NC_005835.1	1146221	1146617	TT_RS05960	-
NC_005835.1	1686537	1686631	6.71941	5.41025	-	NC_005835.1	1685533	1686661	TT_RS09055	-
NC_005835.1	120568	120600	5.8634	5.41025	-	NC_005835.1	119660	120803	TT_RS00695	-
NC_005835.1	228102	228168	5.8634	5.41025	-	NC_005835.1	228084	228435	TT_RS01220	-
NC_005835.1	1254455	1254554	33.4054	5.40967	-	NC_005835.1	1254186	1254576	TT_RS06570	-
NC_005835.1	1345617	1345707	26.8376	5.4086	-	NC_005835.1	1345228	1345789	TT_RS07170	-
NC_005835.1	1128816	1128870	19.3411	5.40575	+	NC_005835.1	1127601	1129188	TT_RS05865	+
NC_005835.1	1811570	1811626	19.3411	5.40575	-	NC_005835.1	1810778	1812227	TT_RS09695	-
NC_005835.1	1588504	1588556	9.91542	5.40422	-	NC_005835.1	1586738	1588565	TT_RS08490	-
NC_005835.1	1194380	1194421	16.9206	5.40302	-	NC_005835.1	1193900	1194665	TT_RS06220	-
NC_005835.1	1692602	1692707	23.3479	5.39816	-	NC_005835.1	1692262	1694275	TT_RS09085	-
NC_005835.1	1888116	1888160	20.6227	5.39509	-	NC_005835.1	1887974	1888571	TT_RS10095	-
NC_005835.1	1559351	1559387	17.2368	5.39201	+	NC_005835.1	1559342	1560587	TT_RS08310	+
NC_005835.1	879736	879789	11.0443	5.392	-	NC_005835.1	878967	879822	TT_RS04550	-
NC_005835.1	1674011	1674108	11.0443	5.392	-	NC_005835.1	1673629	1674298	TT_RS08980	-
NC_005835.1	981681	981777	10.223	5.39199	+	NC_005835.1	980632	982021	TT_RS05055	+
NC_005835.1	1007101	1007135	9.96751	5.39199	+	NC_005835.1	1006390	1007269	TT_RS05200	+
NC_005835.1	1530256	1530305	9.76975	5.39199	-	NC_005835.1	1530085	1531933	TT_RS08160	-
NC_005835.1	220226	220259	8.0376	5.39199	-	NC_005835.1	219772	220798	TT_RS01175	-
NC_005835.1	190409	190490	6.52339	5.39199	+	NC_005835.1	190072	190981	TT_RS01035	+
NC_005835.1	1770493	1770516	6.09117	5.39199	+	NC_005835.1	1769846	1770932	TT_RS09495	+
NC_005835.1	283624	283688	22.5813	5.38854	+	NC_005835.1	283460	284513	TT_RS01505	+
NC_005835.1	914565	914627	15.2341	5.38737	-	NC_005835.1	914163	914640	TT_RS04720	-
NC_005835.1	1613476	1613527	12.8354	5.38736	+	NC_005835.1	1613362	1614583	TT_RS08625	+
NC_005835.1	994976	995006	32.726	5.3835	+	NC_005835.1	994960	997234	TT_RS05145	+
NC_005835.1	843948	844023	11.4434	5.38286	+	NC_005835.1	843189	844227	TT_RS04390	+
NC_005835.1	418223	418259	6.05503	5.38268	-	NC_005835.1	418044	418374	TT_RS02175	-
NC_005835.1	1550419	1550462	5.80807	5.38268	-	NC_005835.1	1550019	1551594	TT_RS08255	-
NC_005835.1	1702105	1702152	5.80807	5.38268	-	NC_005835.1	1701557	1702397	TT_RS09125	-
NC_005835.1	725645	725700	12.3296	5.38082	-	NC_005835.1	725404	726838	TT_RS03765	-
NC_005835.1	852886	852947	13.4734	5.37799	-	NC_005835.1	851928	853008	TT_RS04440	-
NC_005835.1	1333807	1333882	44.1909	5.37331	-	NC_005835.1	1333388	1334798	TT_RS07100	-
NC_005835.1	1495397	1495433	9.59671	5.37326	-	NC_005835.1	1494279	1495443	TT_RS07965	-
NC_005838.1	111037	111120	15.7889	5.36611	+	NC_005838.1	110275	111136	TT_RS10720	+
NC_005835.1	1643856	1643887	10.3536	5.3637	-	NC_005835.1	1643547	1644651	TT_RS08765	-
NC_005835.1	1545368	1545415	8.27463	5.3637	-	NC_005835.1	1545043	1545772	TT_RS08225	-
NC_005835.1	687754	687805	6.38286	5.3637	+	NC_005835.1	686996	690128	TT_RS03570	+
NC_005835.1	1806133	1806206	11.876	5.36049	+	NC_005835.1	1804669	1806625	TT_RS09650	+
NC_005835.1	53724	53761	10.9452	5.36049	+	NC_005835.1	53513	54557	TT_RS00295	+
NC_005835.1	1790507	1790577	9.43945	5.36049	+	NC_005835.1	1790229	1791053	TT_RS09580	+
NC_005838.1	75508	75571	9.43945	5.36049	-	NC_005838.1	74909	75857	TT_RS10540	-
NC_005835.1	1831635	1831732	8.68208	5.35624	+	NC_005835.1	1831414	1831753	TT_RS09795	+
NC_005835.1	887645	887703	19.5645	5.35512	-	NC_005835.1	887057	888494	TT_RS04585	-
NC_005835.1	60257	60361	68.7263	5.35236	-	NC_005835.1	59619	60534	TT_RS00335	-
NC_005835.1	995171	995207	19.2001	5.35078	+	NC_005835.1	994960	997234	TT_RS05145	+
NC_005835.1	345197	345235	17.0481	5.34914	-	NC_005835.1	344678	345572	TT_RS01820	-
NC_005835.1	898438	898500	8.8776	5.34913	+	NC_005835.1	898050	899940	TT_RS04650	+
NC_005835.1	1323118	1323195	31.4754	5.34754	+	NC_005835.1	1323116	1324712	TT_RS07055	+
NC_005835.1	667195	667292	23.8332	5.34752	-	NC_005835.1	667019	667373	TT_RS03485	-
NC_005835.1	297380	297427	39.693	5.34524	-	NC_005835.1	296983	297724	TT_RS01575	-
NC_005835.1	964123	964182	28.2757	5.34424	-	NC_005835.1	963992	964757	TT_RS04950	-
NC_005835.1	145958	146012	27.9102	5.34282	-	NC_005835.1	144754	146026	TT_RS00835	-
NC_005835.1	35306	35350	12.3092	5.34223	-	NC_005835.1	35265	36240	TT_RS00185	-
NC_005835.1	1487381	1487481	14.3798	5.33574	-	NC_005835.1	1486970	1488233	TT_RS07925	-
NC_005835.1	1384569	1384629	10.542	5.33426	-	NC_005835.1	1382491	1385851	TT_RS07385	-
NC_005835.1	1828898	1828955	8.24531	5.33425	-	NC_005835.1	1828649	1829009	TT_RS09775	-
NC_005835.1	427821	427872	7.82477	5.33425	+	NC_005835.1	427761	428982	TT_RS02230	+
NC_005835.1	1431100	1431158	6.12786	5.33425	+	NC_005835.1	1430818	1431742	TT_RS07595	+
NC_005838.1	27781	27844	5.75745	5.33425	+	NC_005838.1	27497	28025	TT_RS10290	+
NC_005835.1	460634	460656	5.59583	5.33425	-	NC_005835.1	460411	460813	TT_RS02395	-
NC_005835.1	827270	827301	5.59583	5.33425	-	NC_005835.1	826927	827941	TT_RS04295	-
NC_005835.1	1036742	1036775	5.59583	5.33425	+	NC_005835.1	1036730	1036940	TT_RS05385	+
NC_005835.1	1759510	1759571	5.59583	5.33425	+	NC_005835.1	1759285	1759729	TT_RS09430	+
NC_005835.1	657642	657681	5.5341	5.33425	-	NC_005835.1	657469	657688	TT_RS03420	-
NC_005838.1	217740	217791	5.5341	5.33425	+	NC_005838.1	217502	219227	TT_RS11210	+
NC_005835.1	961603	961636	7.75217	5.32922	-	NC_005835.1	960014	961751	TT_RS04935	-
NC_005835.1	168173	168208	7.65917	5.32922	+	NC_005835.1	168132	168810	TT_RS00955	+
NC_005835.1	839654	839703	13.0634	5.32248	-	NC_005835.1	839164	839821	TT_RS04365	-
NC_005835.1	1793318	1793352	87.5036	5.32043	+	NC_005835.1	1793286	1793358	TT_RS09590	+
NC_005835.1	1630770	1630806	29.1775	5.31397	+	NC_005835.1	1630034	1631666	TT_RS08700	+
NC_005835.1	703403	703461	16.2678	5.31395	+	NC_005835.1	703018	704087	TT_RS03650	+
NC_005835.1	1162687	1162760	13.6732	5.31394	-	NC_005835.1	1162329	1162773	TT_RS06060	-
NC_005835.1	1888084	1888109	9.69625	5.31393	-	NC_005835.1	1887974	1888571	TT_RS10095	-
NC_005835.1	1877889	1877931	8.53807	5.31393	-	NC_005835.1	1877569	1878538	TT_RS11470	-
NC_005835.1	420681	420691	6.04713	5.31393	-	NC_005835.1	420139	421450	TT_RS02190	-
NC_005835.1	531686	531699	6.04713	5.31393	-	NC_005835.1	531303	532458	TT_RS02760	-
NC_005835.1	554965	555011	6.04713	5.31393	-	NC_005835.1	554174	555215	TT_RS02885	-
NC_005835.1	997943	997980	6.04713	5.31393	+	NC_005835.1	997292	998444	TT_RS05150	+
NC_005835.1	44888	44924	9.20243	5.31049	-	NC_005835.1	44351	45269	TT_RS00235	-
NC_005835.1	1067960	1068035	36.4636	5.30981	-	NC_005835.1	1067877	1068264	TT_RS05555	-
NC_005835.1	42667	42707	9.09454	5.30703	-	NC_005835.1	42000	43227	TT_RS00220	-
NC_005835.1	1364857	1364896	27.3391	5.30359	+	NC_005835.1	1364844	1365261	TT_RS07295	+
NC_005835.1	1458206	1458347	26.113	5.30359	+	NC_005835.1	1457667	1459482	TT_RS07730	+
NC_005835.1	256035	256114	24.9945	5.30359	-	NC_005835.1	255001	256252	TT_RS01365	-
NC_005835.1	514922	514973	8.96863	5.30355	+	NC_005835.1	514875	517812	TT_RS02700	+
NC_005835.1	1129871	1129936	8.96863	5.30355	+	NC_005835.1	1129199	1130060	TT_RS05870	+
NC_005835.1	1546616	1546645	33.5053	5.30229	-	NC_005835.1	1546582	1546789	TT_RS08235	-
NC_005835.1	972758	972802	10.6334	5.29567	+	NC_005835.1	971722	974140	TT_RS05000	+
NC_005835.1	1825173	1825260	12.7383	5.29303	-	NC_005835.1	1824391	1825708	TT_RS09750	-
NC_005835.1	1566786	1566815	9.06485	5.29302	+	NC_005835.1	1566523	1566856	TT_RS08355	+
NC_005835.1	588043	588102	59.6518	5.29287	-	NC_005835.1	586767	588774	TT_RS03065	-
NC_005835.1	1188179	1188221	17.8614	5.2895	-	NC_005835.1	1187679	1188231	TT_RS06185	-
NC_005838.1	9056	9174	30.0329	5.28834	+	NC_005838.1	8965	9637	TT_RS10190	+
NC_005835.1	1775364	1775380	24.8918	5.28772	+	NC_005835.1	1774544	1775453	TT_RS09530	+
NC_005835.1	1613882	1613936	10.4136	5.2877	+	NC_005835.1	1613362	1614583	TT_RS08625	+
NC_005835.1	1454733	1454795	79.5045	5.28498	-	NC_005835.1	1454320	1457167	TT_RS07725	-
NC_005835.1	1200677	1200718	16.0663	5.2845	+	NC_005835.1	1200578	1200845	TT_RS06265	+
NC_005835.1	889824	889879	12.1235	5.27875	-	NC_005835.1	888504	890241	TT_RS04590	-
NC_005835.1	864193	864256	18.7225	5.27695	-	NC_005835.1	863090	866084	TT_RS04490	-
NC_005835.1	499384	499440	14.0927	5.27694	-	NC_005835.1	499058	500324	TT_RS02615	-
NC_005835.1	709216	709289	21.4046	5.2715	+	NC_005835.1	709068	710127	TT_RS03680	+
NC_005835.1	1337270	1337311	14.3871	5.2715	-	NC_005835.1	1337031	1337931	TT_RS07120	-
NC_005835.1	1722580	1722646	12.5048	5.2715	+	NC_005835.1	1722051	1723113	TT_RS09220	+
NC_005835.1	1804910	1804959	10.5835	5.27149	+	NC_005835.1	1804669	1806625	TT_RS09650	+
NC_005835.1	1040777	1040829	9.68073	5.27149	+	NC_005835.1	1040665	1041316	TT_RS05415	+
NC_005835.1	755085	755113	9.29271	5.27149	+	NC_005835.1	755074	756796	TT_RS03930	+
NC_005835.1	419642	419689	8.63702	5.27149	-	NC_005835.1	419181	420117	TT_RS02185	-
NC_005835.1	1680432	1680520	8.63702	5.27149	+	NC_005835.1	1680368	1680974	TT_RS09020	+
NC_005835.1	787194	787233	7.39898	5.27149	-	NC_005835.1	785300	787889	TT_RS04075	-
NC_005835.1	158527	158561	5.73358	5.27148	+	NC_005835.1	157808	159329	TT_RS00890	+
NC_005835.1	1198751	1198832	5.73358	5.27148	+	NC_005835.1	1198641	1198959	TT_RS06240	+
NC_005835.1	1122613	1122689	45.6517	5.26556	+	NC_005835.1	1122100	1123492	TT_RS05840	+
NC_005835.1	60631	60667	21.6078	5.26419	-	NC_005835.1	60533	60974	TT_RS00340	-
NC_005838.1	165440	165504	19.7714	5.26419	+	NC_005838.1	165105	165669	TT_RS10935	+
NC_005835.1	1221206	1221277	13.0024	5.26417	+	NC_005835.1	1220908	1221670	TT_RS06400	+
NC_005835.1	561214	561248	12.8857	5.26417	-	NC_005835.1	561058	562092	TT_RS11375	-
NC_005835.1	431842	431892	8.81603	5.26417	+	NC_005835.1	431543	432491	TT_RS02250	+
NC_005835.1	1592291	1592332	8.79207	5.26417	-	NC_005835.1	1591274	1592432	TT_RS08505	-
NC_005835.1	712859	712898	11.1598	5.26048	-	NC_005835.1	712410	712923	TT_RS03700	-
NC_005835.1	163173	163233	8.75798	5.26048	-	NC_005835.1	162272	163919	TT_RS00920	-
NC_005835.1	498269	498304	7.24766	5.26047	-	NC_005835.1	498052	498421	TT_RS02610	-
NC_005835.1	1495301	1495325	7.28345	5.26047	-	NC_005835.1	1494279	1495443	TT_RS07965	-
NC_005835.1	1290865	1290906	5.71234	5.26047	+	NC_005835.1	1290750	1290951	TT_RS06845	+
NC_005835.1	1776222	1776272	5.71234	5.26047	-	NC_005835.1	1775456	1776461	TT_RS09535	-
NC_005835.1	1654038	1654081	48.8922	5.25005	+	NC_005835.1	1653826	1654618	TT_RS08860	+
NC_005835.1	125177	125238	11.4929	5.2493	-	NC_005835.1	124839	125376	TT_RS00725	-
NC_005835.1	1190738	1190773	11.4929	5.2493	-	NC_005835.1	1190022	1191327	TT_RS06205	-
NC_005835.1	852046	852073	7.5493	5.24929	-	NC_005835.1	851928	853008	TT_RS04440	-
NC_005835.1	939293	939365	7.5493	5.24929	-	NC_005835.1	939047	941474	TT_RS04850	-
NC_005838.1	1104	1171	7.5493	5.24929	-	NC_005838.1	300	1623	TT_RS10140	-
NC_005835.1	376126	376172	5.20688	5.24928	+	NC_005835.1	376104	376767	TT_RS01965	+
NC_005835.1	1628583	1628647	5.20688	5.24928	+	NC_005835.1	1626609	1628847	TT_RS08685	+
NC_005835.1	683737	683801	25.9884	5.24706	-	NC_005835.1	683285	684419	TT_RS03555	-
NC_005835.1	1485113	1485152	10.0866	5.24647	+	NC_005835.1	1484283	1485525	TT_RS07910	+
NC_005835.1	793243	793501	20.6066	5.24564	-	NC_005835.1	792073	793546	TT_RS04095	-
NC_005835.1	1097183	1097290	20.3988	5.24081	+	NC_005835.1	1096219	1098094	TT_RS05700	+
NC_005835.1	1763748	1763804	10.5366	5.24079	+	NC_005835.1	1763634	1764582	TT_RS09455	+
NC_005835.1	1653372	1653404	124.011	5.23813	+	NC_005835.1	1653336	1653412	TT_RS08850	+
NC_005835.1	785401	785453	12.1739	5.23794	-	NC_005835.1	785300	787889	TT_RS04075	-
NC_005835.1	1261331	1261377	10.2762	5.23793	-	NC_005835.1	1261240	1261573	TT_RS06645	-
NC_005835.1	1602812	1602873	10.029	5.23793	+	NC_005835.1	1602537	1604115	TT_RS08560	+
NC_005835.1	874667	874717	8.5194	5.23793	+	NC_005835.1	872126	874742	TT_RS04530	+
NC_005835.1	874667	874717	8.5194	5.23793	+	NC_005835.1	874714	876487	TT_RS04535	+
NC_005835.1	1691141	1691190	8.5194	5.23793	+	NC_005835.1	1690781	1692266	TT_RS09080	+
NC_005835.1	1189225	1189258	5.14774	5.23792	-	NC_005835.1	1188976	1189402	TT_RS06195	-
NC_005835.1	1197715	1197754	5.14774	5.23792	-	NC_005835.1	1197629	1198481	TT_RS06235	-
NC_005835.1	1850197	1850259	5.14774	5.23792	+	NC_005835.1	1849793	1851905	TT_RS09885	+
NC_005835.1	1826079	1826116	12.8956	5.23219	-	NC_005835.1	1825704	1826250	TT_RS09755	-
NC_005835.1	386276	386318	45.6952	5.23108	-	NC_005835.1	386258	386918	TT_RS02020	-
NC_005835.1	239689	239724	8.56778	5.23026	+	NC_005835.1	238842	240042	TT_RS01280	+
NC_005835.1	1817111	1817159	8.56778	5.23026	-	NC_005835.1	1816353	1817763	TT_RS09715	-
NC_005835.1	1454544	1454716	87.0969	5.22991	-	NC_005835.1	1454320	1457167	TT_RS07725	-
NC_005835.1	1446486	1446524	17.2987	5.22757	-	NC_005835.1	1446349	1447135	TT_RS07690	-
NC_005835.1	1557765	1557823	82.4102	5.22697	+	NC_005835.1	1557491	1557941	TT_RS08295	+
NC_005835.1	742098	742229	37.1069	5.22206	-	NC_005835.1	741843	742341	TT_RS03850	-
NC_005835.1	1630929	1630992	69.6219	5.22007	+	NC_005835.1	1630034	1631666	TT_RS08700	+
NC_005835.1	356235	356344	13.4631	5.21239	+	NC_005835.1	356067	356865	TT_RS01880	+
NC_005835.1	719042	719105	17.2002	5.21072	+	NC_005835.1	717957	719145	TT_RS03725	+
NC_005835.1	1333918	1334007	34.8589	5.20931	-	NC_005835.1	1333388	1334798	TT_RS07100	-
NC_005835.1	1361281	1361320	10.1412	5.20873	-	NC_005835.1	1360864	1361464	TT_RS07260	-
NC_005835.1	501664	501708	12.6709	5.20274	-	NC_005835.1	501413	502196	TT_RS02625	-
NC_005835.1	148547	148596	10.4932	5.20274	+	NC_005835.1	148464	148926	TT_RS00850	+
NC_005835.1	1235845	1235899	10.4932	5.20274	-	NC_005835.1	1235684	1237919	TT_RS06470	-
NC_005835.1	1632081	1632143	9.81167	5.20274	-	NC_005835.1	1631729	1633262	TT_RS08705	-
NC_005835.1	747320	747384	8.67915	5.20274	+	NC_005835.1	747226	747718	TT_RS03885	+
NC_005835.1	166138	166172	7.97618	5.20274	+	NC_005835.1	166004	166475	TT_RS00945	+
NC_005835.1	396644	396730	7.21275	5.20273	-	NC_005835.1	396020	397286	TT_RS02070	-
NC_005835.1	464652	464698	6.92863	5.20273	+	NC_005835.1	464623	465256	TT_RS02415	+
NC_005835.1	1514396	1514425	5.37862	5.20273	-	NC_005835.1	1514049	1514844	TT_RS08080	-
NC_005835.1	195820	195870	5.09395	5.20273	-	NC_005835.1	195152	196853	TT_RS01060	-
NC_005835.1	1296056	1296103	5.09395	5.20273	+	NC_005835.1	1295658	1296177	TT_RS06875	+
NC_005835.1	1871167	1871210	5.09395	5.20273	-	NC_005835.1	1871088	1871583	TT_RS11260	-
NC_005835.1	908253	908327	10.391	5.20264	-	NC_005835.1	907922	908351	TT_RS04685	-
NC_005835.1	1744646	1744744	50.0805	5.19676	+	NC_005835.1	1744601	1744952	TT_RS09340	+
NC_005835.1	1088154	1088207	9.70206	5.1967	-	NC_005835.1	1087854	1088268	TT_RS05660	-
NC_005835.1	225006	225056	7.52256	5.1967	-	NC_005835.1	224983	225439	TT_RS01200	-
NC_005835.1	399496	399566	7.37517	5.1967	-	NC_005835.1	398744	399836	TT_RS02085	-
NC_005835.1	1041212	1041256	7.52256	5.1967	+	NC_005835.1	1040665	1041316	TT_RS05415	+
NC_005835.1	1229522	1229554	7.37517	5.1967	+	NC_005835.1	1229290	1229851	TT_RS06440	+
NC_005835.1	1747782	1747855	7.37517	5.1967	+	NC_005835.1	1747686	1748010	TT_RS09365	+
NC_005835.1	1795098	1795175	7.52256	5.1967	-	NC_005835.1	1794946	1796167	TT_RS09605	-
NC_005835.1	1550253	1550373	14.6382	5.18449	-	NC_005835.1	1550019	1551594	TT_RS08255	-
NC_005835.1	854589	854691	7.09184	5.18447	+	NC_005835.1	854574	856119	TT_RS04465	+
NC_005835.1	1687793	1687842	6.91092	5.18447	+	NC_005835.1	1687665	1688478	TT_RS09065	+
NC_005835.1	279600	279622	11.9052	5.18242	-	NC_005835.1	279440	280474	TT_RS11330	-
NC_005835.1	1775043	1775116	90.407	5.1802	+	NC_005835.1	1774544	1775453	TT_RS09530	+
NC_005835.1	1461780	1461825	12.4505	5.17829	-	NC_005835.1	1461666	1462317	TT_RS07755	-
NC_005835.1	1883315	1883352	8.5898	5.17204	+	NC_005835.1	1883006	1883678	TT_RS10065	+
NC_005835.1	721591	721643	20.7248	5.16828	-	NC_005835.1	720725	721655	TT_RS03735	-
NC_005835.1	740017	740065	34.8549	5.15688	-	NC_005835.1	739721	740177	TT_RS03835	-
NC_005835.1	893742	893789	18.0687	5.1562	-	NC_005835.1	892485	894444	TT_RS04615	-
NC_005835.1	493654	493689	13.4763	5.15619	-	NC_005835.1	492935	493706	TT_RS02580	-
NC_005835.1	1188110	1188143	9.19469	5.15618	-	NC_005835.1	1187679	1188231	TT_RS06185	-
NC_005835.1	1494349	1494389	9.19469	5.15618	-	NC_005835.1	1494279	1495443	TT_RS07965	-
NC_005835.1	407281	407302	13.4329	5.15298	-	NC_005835.1	405922	408310	TT_RS02120	-
NC_005838.1	112940	113008	8.20256	5.15297	+	NC_005838.1	112660	113068	TT_RS10735	+
NC_005835.1	1185820	1185863	7.14741	5.15297	+	NC_005835.1	1184757	1186662	TT_RS06175	+
NC_005835.1	378930	378986	6.78868	5.15297	-	NC_005835.1	377770	379603	TT_RS01975	-
NC_005835.1	919418	919449	6.87702	5.15297	-	NC_005835.1	919194	919752	TT_RS04745	-
NC_005835.1	235370	235411	4.8822	5.15296	-	NC_005835.1	233222	236309	TT_RS01250	-
NC_005838.1	63218	63254	4.8822	5.15296	-	NC_005838.1	62375	63323	TT_RS10485	-
NC_005835.1	17499	17551	17.8093	5.13999	+	NC_005835.1	17080	17821	TT_RS00095	+
NC_005835.1	525232	525294	12.4011	5.13998	+	NC_005835.1	524790	525816	TT_RS02725	+
NC_005835.1	892315	892359	23.252	5.13927	-	NC_005835.1	892171	892471	TT_RS04610	-
NC_005835.1	1681736	1681812	18.7502	5.13296	+	NC_005835.1	1681613	1682729	TT_RS09030	+
NC_005835.1	1483388	1483426	13.4484	5.13008	+	NC_005835.1	1483174	1484287	TT_RS07905	+
NC_005835.1	1806694	1806854	14.3856	5.12974	+	NC_005835.1	1806679	1807105	TT_RS09655	+
NC_005835.1	231638	231702	11.5224	5.12896	-	NC_005835.1	231188	231956	TT_RS01235	-
NC_005835.1	356097	356165	9.85772	5.12674	+	NC_005835.1	356067	356865	TT_RS01880	+
NC_005838.1	46388	46439	6.53756	5.12673	+	NC_005838.1	46315	46939	TT_RS10385	+
NC_005835.1	1282175	1282216	4.9497	5.12673	+	NC_005835.1	1282105	1282897	TT_RS06805	+
NC_005835.1	1705940	1706013	4.9497	5.12673	-	NC_005835.1	1705810	1706668	TT_RS09155	-
NC_005835.1	525908	525937	4.76465	5.12673	+	NC_005835.1	525894	526308	TT_RS02730	+
NC_005835.1	777204	777266	4.76465	5.12673	+	NC_005835.1	775949	777923	TT_RS04020	+
NC_005835.1	1156916	1156942	4.76465	5.12673	+	NC_005835.1	1155938	1157600	TT_RS06025	+
NC_005835.1	1476400	1476418	4.76465	5.12673	-	NC_005835.1	1476144	1477122	TT_RS07845	-
NC_005835.1	1656888	1656919	4.76465	5.12673	+	NC_005835.1	1656709	1657534	TT_RS08880	+
NC_005835.1	1688768	1688795	4.76465	5.12673	+	NC_005835.1	1688479	1689619	TT_RS09070	+
NC_005835.1	95012	95063	13.946	5.11779	+	NC_005835.1	94242	95208	TT_RS00530	+
NC_005835.1	350690	350758	11.1141	5.11778	-	NC_005835.1	350406	351081	TT_RS01845	-
NC_005835.1	463193	463237	11.1141	5.11778	-	NC_005835.1	460855	463459	TT_RS02400	-
NC_005835.1	500142	500187	8.65098	5.11777	-	NC_005835.1	499058	500324	TT_RS02615	-
NC_005835.1	250698	250792	9.66179	5.11636	+	NC_005835.1	250324	252901	TT_RS01330	+
NC_005835.1	1873171	1873226	8.83324	5.10642	-	NC_005835.1	1872516	1873641	TT_RS10015	-
NC_005835.1	1733232	1733318	7.35403	5.10641	+	NC_005835.1	1731470	1734107	TT_RS09285	+
NC_005835.1	563765	563832	6.96599	5.10492	-	NC_005835.1	562390	563848	TT_RS02940	-
NC_005835.1	1107357	1107470	15.6351	5.10299	+	NC_005835.1	1107355	1107973	TT_RS05745	+
NC_005835.1	1415035	1415130	13.6184	5.1027	+	NC_005835.1	1414440	1415736	TT_RS07525	+
NC_005835.1	995965	996038	41.3158	5.10233	+	NC_005835.1	994960	997234	TT_RS05145	+
NC_005835.1	964486	964559	34.3263	5.09955	-	NC_005835.1	963992	964757	TT_RS04950	-
NC_005835.1	35535	35566	8.81291	5.09951	-	NC_005835.1	35265	36240	TT_RS00185	-
NC_005835.1	896982	897073	7.75375	5.09951	+	NC_005835.1	896599	897274	TT_RS04640	+
NC_005835.1	1495349	1495380	7.80594	5.09951	-	NC_005835.1	1494279	1495443	TT_RS07965	-
NC_005835.1	896382	896417	6.46764	5.09951	+	NC_005835.1	896221	896575	TT_RS04635	+
NC_005835.1	1230435	1230479	19.7597	5.08552	+	NC_005835.1	1229847	1231740	TT_RS06445	+
NC_005835.1	729984	730044	7.78391	5.0855	-	NC_005835.1	729743	732158	TT_RS03785	-
NC_005835.1	571166	571222	6.99207	5.0855	+	NC_005835.1	570389	571565	TT_RS02985	+
NC_005835.1	609212	609277	6.99207	5.0855	-	NC_005835.1	608744	610613	TT_RS03170	-
NC_005835.1	1552720	1552809	22.1057	5.07125	-	NC_005835.1	1551649	1553476	TT_RS08260	-
NC_005835.1	374398	374470	14.871	5.07123	-	NC_005835.1	374161	376087	TT_RS01960	-
NC_005835.1	192681	192730	9.58084	5.07122	+	NC_005835.1	192403	193147	TT_RS01045	+
NC_005835.1	980472	980524	9.67278	5.07122	+	NC_005835.1	979932	980643	TT_RS05050	+
NC_005835.1	424198	424248	4.71512	5.07121	-	NC_005835.1	423785	424943	TT_RS02205	-
NC_005835.1	239588	239660	10.8731	5.06882	+	NC_005835.1	238842	240042	TT_RS01280	+
NC_005835.1	1206909	1206964	23.5545	5.06803	-	NC_005835.1	1206580	1207108	TT_RS06310	-
NC_005835.1	744567	744625	6.24473	5.06396	-	NC_005835.1	744069	744954	TT_RS03870	-
NC_005835.1	1038605	1038636	6.24473	5.06396	-	NC_005835.1	1038449	1039264	TT_RS05400	-
NC_005835.1	1530546	1530577	8.72921	5.05665	-	NC_005835.1	1530085	1531933	TT_RS08160	-
NC_005835.1	696288	696335	6.82273	5.05664	+	NC_005835.1	696127	696562	TT_RS03610	+
NC_005835.1	1140220	1140257	6.95647	5.05664	-	NC_005835.1	1139592	1141083	TT_RS05925	-
NC_005835.1	543600	543666	4.49584	5.05664	-	NC_005835.1	542568	543864	TT_RS02815	-
NC_005835.1	1279509	1279596	4.49584	5.05664	-	NC_005835.1	1278601	1279621	TT_RS06790	-
NC_005835.1	1607914	1608047	28.0799	5.0418	+	NC_005835.1	1607638	1608154	TT_RS08595	+
NC_005835.1	1207614	1207652	13.009	5.04178	-	NC_005835.1	1207117	1207654	TT_RS06315	-
NC_005838.1	49864	49915	11.7085	5.04178	-	NC_005838.1	49236	50100	TT_RS10410	-
NC_005835.1	991526	991572	8.87007	5.04177	+	NC_005835.1	990629	991634	TT_RS05120	+
NC_005835.1	1214124	1214184	7.64843	5.04177	+	NC_005835.1	1213933	1214557	TT_RS06360	+
NC_005835.1	542159	542231	6.82707	5.04177	-	NC_005835.1	541502	542483	TT_RS02810	-
NC_005835.1	333156	333186	6.38385	5.04177	-	NC_005835.1	332905	334621	TT_RS01765	-
NC_005835.1	666010	666040	6.38385	5.04177	-	NC_005835.1	665663	666083	TT_RS03475	-
NC_005838.1	16332	16355	4.43742	5.04176	+	NC_005838.1	15951	16371	TT_RS10235	+
NC_005838.1	16332	16355	4.43742	5.04176	+	NC_005838.1	16309	16639	TT_RS10240	+
NC_005835.1	150220	150242	7.32146	5.03674	-	NC_005835.1	150069	150936	TT_RS00860	-
NC_005835.1	1259396	1259427	10.5896	5.03422	-	NC_005835.1	1259116	1259455	TT_RS06620	-
NC_005835.1	1259860	1259923	16.7871	5.03329	-	NC_005835.1	1259466	1260009	TT_RS06625	-
NC_005835.1	848563	848613	32.2814	5.03172	-	NC_005835.1	848117	849173	TT_RS04420	-
NC_005835.1	1482738	1482762	233.679	5.02568	-	NC_005835.1	1482685	1482762	TT_RS07895	-
NC_005835.1	1314401	1314436	36.5891	5.02278	-	NC_005835.1	1314283	1314661	TT_RS07000	-
NC_005835.1	92491	92576	12.9379	5.02146	+	NC_005835.1	92291	92918	TT_RS00515	+
NC_005835.1	380757	380826	13.1912	5.02146	+	NC_005835.1	379992	380847	TT_RS01980	+
NC_005835.1	1047015	1047051	8.3071	5.02145	-	NC_005835.1	1046977	1048309	TT_RS05440	-
NC_005835.1	1825102	1825160	8.3071	5.02145	-	NC_005835.1	1824391	1825708	TT_RS09750	-
NC_005835.1	1655095	1655138	34.4933	5.01696	+	NC_005835.1	1654891	1655338	TT_RS08870	+
NC_005835.1	1761181	1761219	18.3539	5.01422	+	NC_005835.1	1761146	1761380	TT_RS09440	+
NC_005835.1	1559153	1559194	17.992	4.99524	+	NC_005835.1	1558946	1559342	TT_RS08305	+
NC_005835.1	265402	265496	16.3743	4.99523	-	NC_005835.1	265287	266382	TT_RS01425	-
NC_005835.1	1560348	1560375	11.2073	4.99522	+	NC_005835.1	1559342	1560587	TT_RS08310	+
NC_005835.1	147551	147600	8.92656	4.99522	+	NC_005835.1	147247	148465	TT_RS00845	+
NC_005835.1	907272	907304	6.49052	4.99521	-	NC_005835.1	906466	907477	TT_RS04675	-
NC_005835.1	1594871	1594926	6.49052	4.99521	+	NC_005835.1	1594624	1595134	TT_RS08520	+
NC_005835.1	1819717	1819766	5.98692	4.99521	-	NC_005835.1	1819579	1819867	TT_RS09725	-
NC_005835.1	717979	718001	5.90677	4.99521	+	NC_005835.1	717957	719145	TT_RS03725	+
NC_005835.1	1427461	1427496	5.90677	4.99521	+	NC_005835.1	1426087	1427779	TT_RS07575	+
NC_005835.1	862087	862194	4.38581	4.99521	+	NC_005835.1	861143	863027	TT_RS04485	+
NC_005835.1	909346	909389	4.38581	4.99521	-	NC_005835.1	908936	909665	TT_RS04695	-
NC_005835.1	1194856	1194949	14.9932	4.9914	+	NC_005835.1	1194681	1196397	TT_RS06225	+
NC_005835.1	484951	485043	74.8554	4.98858	+	NC_005835.1	484819	486016	TT_RS02530	+
NC_005835.1	1259035	1259081	28.172	4.98556	-	NC_005835.1	1258615	1259104	TT_RS06615	-
NC_005835.1	1375957	1376013	8.36037	4.98445	-	NC_005835.1	1375004	1376039	TT_RS07360	-
NC_005835.1	1619249	1619279	7.0543	4.979	+	NC_005835.1	1619158	1619422	TT_RS08650	+
NC_005835.1	1177164	1177224	6.00542	4.979	-	NC_005835.1	1177054	1177978	TT_RS06135	-
NC_005835.1	1288902	1288959	20.0407	4.97698	+	NC_005835.1	1288363	1290547	TT_RS06840	+
NC_005835.1	1414030	1414070	16.7183	4.97078	+	NC_005835.1	1412981	1414388	TT_RS07520	+
NC_005835.1	641874	641906	16.3705	4.97077	-	NC_005835.1	641867	641940	TT_RS03315	-
NC_005835.1	663080	663167	10.8732	4.968	-	NC_005835.1	662914	664393	TT_RS03455	-
NC_005835.1	1861650	1861692	10.8732	4.968	-	NC_005835.1	1861230	1862085	TT_RS09950	-
NC_005835.1	1134657	1134704	6.99686	4.96799	-	NC_005835.1	1133651	1135364	TT_RS05900	-
NC_005835.1	812585	812620	9.94509	4.96577	-	NC_005835.1	812431	812869	TT_RS04205	-
NC_005835.1	1386332	1386410	44.1275	4.96354	-	NC_005835.1	1386040	1386682	TT_RS07390	-
NC_005835.1	1719723	1719784	26.3727	4.96165	+	NC_005835.1	1719610	1719850	TT_RS09200	+
NC_005835.1	1043884	1043942	17.8258	4.96076	+	NC_005835.1	1043080	1045939	TT_RS05430	+
NC_005835.1	1842676	1842731	13.7494	4.95823	+	NC_005835.1	1840329	1842804	TT_RS09830	+
NC_005835.1	20247	20288	7.08019	4.95681	+	NC_005835.1	19891	21529	TT_RS00110	+
NC_005835.1	563602	563673	7.08019	4.95681	-	NC_005835.1	562390	563848	TT_RS02940	-
NC_005835.1	1188299	1188414	30.6245	4.95402	-	NC_005835.1	1188246	1188867	TT_RS06190	-
NC_005835.1	889181	889221	9.68514	4.94545	-	NC_005835.1	888504	890241	TT_RS04590	-
NC_005835.1	900974	901050	8.87684	4.94545	-	NC_005835.1	899917	901411	TT_RS04655	-
NC_005835.1	938743	938800	7.90058	4.94545	-	NC_005835.1	937413	939051	TT_RS04845	-
NC_005835.1	1057498	1057522	7.98049	4.94545	+	NC_005835.1	1057418	1057973	TT_RS05495	+
NC_005835.1	487798	487839	7.32512	4.94545	-	NC_005835.1	487418	488048	TT_RS02545	-
NC_005835.1	816164	816210	6.1548	4.94544	-	NC_005835.1	815656	816694	TT_RS04230	-
NC_005835.1	956897	956930	6.1548	4.94544	+	NC_005835.1	956031	957075	TT_RS04920	+
NC_005835.1	1353769	1353838	6.16432	4.94544	+	NC_005835.1	1352927	1354073	TT_RS07220	+
NC_005835.1	42099	42140	5.84449	4.94544	-	NC_005835.1	42000	43227	TT_RS00220	-
NC_005838.1	27682	27744	5.84449	4.94544	+	NC_005838.1	27497	28025	TT_RS10290	+
NC_005835.1	766841	766899	4.17438	4.94544	+	NC_005835.1	766071	767637	TT_RS03970	+
NC_005835.1	951370	951432	4.17438	4.94544	+	NC_005835.1	950909	951689	TT_RS04895	+
NC_005838.1	29115	29168	4.17438	4.94544	+	NC_005838.1	28749	29211	TT_RS10300	+
NC_005835.1	1256703	1256735	15.4177	4.94202	-	NC_005835.1	1256685	1258002	TT_RS06600	-
NC_005835.1	876597	876753	6.2217	4.94043	-	NC_005835.1	876483	877986	TT_RS04540	-
NC_005835.1	250576	250613	8.8164	4.9397	+	NC_005835.1	250324	252901	TT_RS01330	+
NC_005835.1	851361	851450	20.0753	4.93509	-	NC_005835.1	850798	851917	TT_RS04435	-
NC_005835.1	176293	176383	8.71145	4.93475	+	NC_005835.1	175896	176532	TT_RS00990	+
NC_005835.1	1097836	1097938	24.3752	4.9344	+	NC_005835.1	1096219	1098094	TT_RS05700	+
NC_005835.1	1561591	1561627	7.91001	4.93245	-	NC_005835.1	1560596	1561727	TT_RS08315	-
NC_005835.1	1086505	1086545	13.1932	4.91476	-	NC_005835.1	1086150	1086573	TT_RS05645	-
NC_005835.1	408521	408555	15.4678	4.91027	-	NC_005835.1	408368	409118	TT_RS02125	-
NC_005835.1	1189945	1189978	10.2066	4.91026	-	NC_005835.1	1189409	1189997	TT_RS06200	-
NC_005835.1	1817997	1818061	10.2066	4.91026	-	NC_005835.1	1817756	1819577	TT_RS09720	-
NC_005835.1	1247281	1247346	10.0081	4.91026	-	NC_005835.1	1246957	1247401	TT_RS06520	-
NC_005835.1	143717	143743	5.51781	4.91025	+	NC_005835.1	143388	143895	TT_RS00825	+
NC_005835.1	770628	770651	4.05859	4.91025	+	NC_005835.1	770448	771675	TT_RS03990	+
NC_005835.1	778319	778347	4.05859	4.91025	+	NC_005835.1	777929	778664	TT_RS04025	+
NC_005835.1	1239370	1239444	4.05859	4.91025	-	NC_005835.1	1238010	1239666	TT_RS06475	-
NC_005835.1	741420	741514	22.7856	4.9028	-	NC_005835.1	740509	741847	TT_RS03845	-
NC_005835.1	872457	872556	19.0188	4.89201	+	NC_005835.1	872126	874742	TT_RS04530	+
NC_005835.1	888023	888066	11.8444	4.892	-	NC_005835.1	887057	888494	TT_RS04585	-
NC_005835.1	331548	331617	10.341	4.892	-	NC_005835.1	330327	332535	TT_RS01755	-
NC_005835.1	958605	958643	9.69634	4.89199	-	NC_005835.1	958215	960018	TT_RS04930	-
NC_005835.1	57310	57373	9.26922	4.89199	+	NC_005835.1	56881	58363	TT_RS00315	+
NC_005835.1	208357	208439	6.11849	4.89199	-	NC_005835.1	207283	208468	TT_RS01120	-
NC_005835.1	212795	212883	5.69819	4.89199	-	NC_005835.1	212353	213397	TT_RS01145	-
NC_005835.1	1390014	1390051	17.102	4.88686	-	NC_005835.1	1389890	1390913	TT_RS07410	-
NC_005835.1	1252288	1252334	38.4837	4.88273	-	NC_005835.1	1252217	1252574	TT_RS06555	-
NC_005835.1	1314756	1314782	5.51202	4.88268	-	NC_005835.1	1314701	1315181	TT_RS07005	-
NC_005835.1	1746407	1746469	11.8189	4.88082	+	NC_005835.1	1744979	1746419	TT_RS09345	+
NC_005835.1	1746407	1746469	11.8189	4.88082	+	NC_005835.1	1746403	1746832	TT_RS09350	+
NC_005835.1	1255808	1255834	21.3448	4.88028	-	NC_005835.1	1255354	1256122	TT_RS06590	-
NC_005835.1	782641	782673	8.16702	4.87955	+	NC_005835.1	782467	782785	TT_RS04060	+
NC_005835.1	134650	134697	9.03291	4.87326	+	NC_005835.1	133849	135271	TT_RS00770	+
NC_005835.1	712796	712834	8.09816	4.87325	-	NC_005835.1	712410	712923	TT_RS03700	-
NC_005838.1	62064	62099	8.09816	4.87325	+	NC_005838.1	61952	62345	TT_RS10480	+
NC_005835.1	1718344	1718376	7.26014	4.87325	+	NC_005835.1	1718307	1719006	TT_RS09190	+
NC_005835.1	1651629	1651668	10.7423	4.86371	+	NC_005835.1	1651520	1652075	TT_RS08835	+
NC_005835.1	726915	726959	10.015	4.8637	+	NC_005835.1	726904	727534	TT_RS03770	+
NC_005835.1	1064760	1064824	10.1841	4.8637	+	NC_005835.1	1064097	1065054	TT_RS05535	+
NC_005835.1	1517835	1517884	9.36276	4.8637	+	NC_005835.1	1516867	1518901	TT_RS08105	+
NC_005835.1	1277087	1277106	16.2199	4.8605	+	NC_005835.1	1276881	1277628	TT_RS06770	+
NC_005835.1	60501	60524	11.2362	4.86049	-	NC_005835.1	59619	60534	TT_RS00335	-
NC_005835.1	354257	354283	9.2418	4.84749	+	NC_005835.1	354235	354802	TT_RS01870	+
NC_005835.1	930579	930647	6.35957	4.84749	+	NC_005835.1	929731	930721	TT_RS04805	+
NC_005835.1	1224923	1224964	26.8754	4.83427	-	NC_005835.1	1223976	1225845	TT_RS06415	-
NC_005835.1	83681	83781	14.0659	4.83427	-	NC_005835.1	82790	83800	TT_RS11300	-
NC_005835.1	1827624	1827697	9.68983	4.83426	-	NC_005835.1	1827486	1828110	TT_RS09765	-
NC_005835.1	1451700	1451734	9.02978	4.83425	+	NC_005835.1	1451189	1452212	TT_RS07715	+
NC_005835.1	664169	664235	7.91811	4.83425	-	NC_005835.1	662914	664393	TT_RS03455	-
NC_005835.1	1127490	1127533	7.76581	4.83425	+	NC_005835.1	1126353	1127577	TT_RS05860	+
NC_005835.1	277568	277614	7.1181	4.83425	-	NC_005835.1	277142	278075	TT_RS01465	-
NC_005835.1	1047962	1047982	6.30764	4.83425	-	NC_005835.1	1046977	1048309	TT_RS05440	-
NC_005835.1	11013	11051	5.21571	4.83425	+	NC_005835.1	9983	11237	TT_RS00055	+
NC_005835.1	165148	165189	5.21571	4.83425	+	NC_005835.1	164788	165304	TT_RS00930	+
NC_005835.1	310829	310858	5.21571	4.83425	-	NC_005835.1	310587	310938	TT_RS01655	-
NC_005835.1	483343	483369	3.79129	4.83424	-	NC_005835.1	482888	483575	TT_RS02510	-
NC_005835.1	343736	343773	7.13965	4.82922	-	NC_005835.1	342468	343785	TT_RS01810	-
NC_005835.1	1505196	1505277	7.10187	4.82922	+	NC_005835.1	1504999	1506853	TT_RS08045	+
NC_005835.1	993248	993283	18.775	4.82823	+	NC_005835.1	992894	993518	TT_RS05130	+
NC_005835.1	940258	940319	8.70812	4.81393	-	NC_005835.1	939047	941474	TT_RS04850	-
NC_005835.1	1471500	1471533	5.30502	4.81393	-	NC_005835.1	1471089	1472220	TT_RS07820	-
NC_005835.1	1252036	1252075	3.73391	4.81392	+	NC_005835.1	1251616	1252096	TT_RS06550	+
NC_005835.1	1832671	1832688	3.73391	4.81392	+	NC_005835.1	1832442	1833162	TT_RS09810	+
NC_005835.1	829965	830099	7.37513	4.80911	-	NC_005835.1	828446	830135	TT_RS04305	-
NC_005835.1	1638722	1638811	18.4489	4.80796	-	NC_005835.1	1638394	1639567	TT_RS08740	-
NC_005835.1	360059	360116	6.43372	4.80703	-	NC_005835.1	359747	362456	TT_RS01900	-
NC_005835.1	199856	199952	18.4201	4.80147	+	NC_005835.1	199623	200682	TT_RS01080	+
NC_005835.1	710155	710197	13.3507	4.79907	+	NC_005835.1	710140	710641	TT_RS03685	+
NC_005835.1	219591	219627	8.57193	4.79302	-	NC_005835.1	218822	219776	TT_RS01170	-
NC_005835.1	410218	410300	31.2129	4.78023	-	NC_005835.1	409841	410831	TT_RS02135	-
NC_005835.1	1031786	1031826	9.83388	4.77874	-	NC_005835.1	1031046	1033125	TT_RS05365	-
NC_005835.1	1149370	1149411	6.03027	4.77148	+	NC_005835.1	1148639	1150411	TT_RS05980	+
NC_005835.1	236907	236941	23.2246	4.76861	+	NC_005835.1	236869	236954	TT_RS01265	+
NC_005835.1	546955	546983	6.07041	4.76416	+	NC_005835.1	546151	547651	TT_RS02845	+
NC_005835.1	988038	988068	93.974	4.76122	+	NC_005835.1	988000	988076	TT_RS05105	+
NC_005835.1	1162895	1162936	14.2555	4.76049	-	NC_005835.1	1162777	1163734	TT_RS06065	-
NC_005835.1	993192	993237	19.3624	4.75844	+	NC_005835.1	992894	993518	TT_RS05130	+
NC_005835.1	1433635	1433722	24.0568	4.75828	-	NC_005835.1	1433280	1434087	TT_RS07615	-
NC_005835.1	915760	915801	9.46289	4.74929	-	NC_005835.1	914679	915819	TT_RS04725	-
NC_005835.1	662616	662692	10.5905	4.73794	-	NC_005835.1	662038	662914	TT_RS03450	-
NC_005835.1	1840546	1840583	8.85637	4.73793	+	NC_005835.1	1840329	1842804	TT_RS09830	+
NC_005835.1	490253	490319	7.14743	4.73793	-	NC_005835.1	490156	490981	TT_RS02560	-
NC_005835.1	97208	97260	4.9325	4.73792	+	NC_005835.1	97015	97654	TT_RS00540	+
NC_005835.1	1430952	1430989	4.98617	4.73792	+	NC_005835.1	1430818	1431742	TT_RS07595	+
NC_005835.1	1187328	1187385	16.016	4.73028	-	NC_005835.1	1186710	1187670	TT_RS06180	-
NC_005835.1	345628	345653	5.94725	4.7107	-	NC_005835.1	345568	347311	TT_RS01825	-
NC_005835.1	1557634	1557694	71.4179	4.70949	+	NC_005835.1	1557491	1557941	TT_RS08295	+
NC_005835.1	727279	727363	19.8559	4.70276	+	NC_005835.1	726904	727534	TT_RS03770	+
NC_005835.1	962702	962767	13.2116	4.70275	-	NC_005835.1	961811	962945	TT_RS04940	-
NC_005835.1	359935	360001	7.70502	4.70274	-	NC_005835.1	359747	362456	TT_RS01900	-
NC_005835.1	490742	490794	6.79308	4.70273	-	NC_005835.1	490156	490981	TT_RS02560	-
NC_005835.1	1492242	1492285	6.57142	4.70273	-	NC_005835.1	1492005	1493202	TT_RS07955	-
NC_005835.1	1406232	1406277	5.00032	4.70273	+	NC_005835.1	1405804	1406488	TT_RS07495	+
NC_005838.1	222267	222317	5.00032	4.70273	+	NC_005838.1	221616	223665	TT_RS11220	+
NC_005835.1	483597	483631	3.41246	4.70273	+	NC_005835.1	483592	484021	TT_RS02515	+
NC_005835.1	496953	497048	3.41246	4.70273	+	NC_005835.1	496410	498003	TT_RS02605	+
NC_005835.1	1202822	1202860	3.41246	4.70273	+	NC_005835.1	1202777	1203506	TT_RS06275	+
NC_005838.1	11198	11221	8.83697	4.68653	+	NC_005838.1	10381	11245	TT_RS10200	+
NC_005835.1	1821555	1821595	5.54118	4.68652	-	NC_005835.1	1820944	1822042	TT_RS09740	-
NC_005835.1	1400317	1400480	23.1256	4.6848	-	NC_005835.1	1399576	1400560	TT_RS07465	-
NC_005835.1	982590	982664	18.4611	4.67553	-	NC_005835.1	982576	983380	TT_RS05065	-
NC_005835.1	336857	336880	223.472	4.67249	+	NC_005835.1	336628	336977	TT_RS11335	+
NC_005835.1	1414167	1414203	16.6195	4.66575	+	NC_005835.1	1412981	1414388	TT_RS07520	+
NC_005835.1	1565495	1565565	70.0732	4.65871	+	NC_005835.1	1565256	1565661	TT_RS08340	+
NC_005835.1	1515682	1515717	8.2917	4.65297	-	NC_005835.1	1515403	1515931	TT_RS08090	-
NC_005835.1	911905	911965	6.47029	4.65297	-	NC_005835.1	911533	913390	TT_RS04710	-
NC_005835.1	258689	258726	5.946	4.65296	+	NC_005835.1	257647	259042	TT_RS01385	+
NC_005835.1	1059442	1059474	5.74208	4.65296	-	NC_005835.1	1058734	1060467	TT_RS05505	-
NC_005835.1	440098	440149	4.59721	4.65296	-	NC_005835.1	439423	440542	TT_RS02290	-
NC_005835.1	239177	239189	4.52446	4.65296	+	NC_005835.1	238842	240042	TT_RS01280	+
NC_005835.1	789177	789209	4.52446	4.65296	-	NC_005835.1	788794	789559	TT_RS04085	-
NC_005835.1	1093254	1093315	12.2931	4.63998	-	NC_005835.1	1092802	1093645	TT_RS05685	-
NC_005835.1	743002	743026	7.86627	4.63997	-	NC_005835.1	742986	743889	TT_RS03860	-
NC_005835.1	150694	150735	7.56592	4.63997	-	NC_005835.1	150069	150936	TT_RS00860	-
NC_005835.1	1585259	1585314	6.09041	4.63997	-	NC_005835.1	1583322	1585698	TT_RS08480	-
NC_005835.1	368588	368674	4.68358	4.63996	-	NC_005835.1	368140	369112	TT_RS01925	-
NC_005835.1	1858939	1859001	4.68358	4.63996	+	NC_005835.1	1857744	1859280	TT_RS09930	+
NC_005835.1	564298	564363	21.2524	4.62898	-	NC_005835.1	564034	564787	TT_RS02950	-
NC_005835.1	105211	105256	11.2088	4.62674	+	NC_005835.1	104983	105292	TT_RS00600	+
NC_005835.1	1212359	1212410	8.91003	4.62674	+	NC_005835.1	1211575	1212640	TT_RS06345	+
NC_005835.1	691965	692022	7.04787	4.62673	+	NC_005835.1	691279	692134	TT_RS03580	+
NC_005835.1	535253	535285	4.43745	4.62673	+	NC_005835.1	534314	535310	TT_RS02780	+
NC_005835.1	689936	689997	4.49348	4.62673	+	NC_005835.1	686996	690128	TT_RS03570	+
NC_005835.1	1278479	1278513	16.771	4.62483	-	NC_005835.1	1278458	1278549	TT_RS06785	-
NC_005835.1	1525420	1525461	9.77577	4.61778	+	NC_005835.1	1524641	1525769	TT_RS08135	+
NC_005835.1	215504	215580	9.20903	4.61778	+	NC_005835.1	214338	216000	TT_RS01155	+
NC_005835.1	173943	174069	20.2805	4.61115	-	NC_005835.1	172515	174984	TT_RS00980	-
NC_005835.1	568242	568275	5.61121	4.59951	+	NC_005835.1	568123	569689	TT_RS02975	+
NC_005835.1	1038660	1038688	5.37918	4.59951	-	NC_005835.1	1038449	1039264	TT_RS05400	-
NC_005835.1	1608887	1608926	10.704	4.59332	+	NC_005835.1	1608515	1609265	TT_RS08605	+
NC_005835.1	1229732	1229770	7.54226	4.5855	+	NC_005835.1	1229290	1229851	TT_RS06440	+
NC_005835.1	1682224	1682249	7.54226	4.5855	+	NC_005835.1	1681613	1682729	TT_RS09030	+
NC_005835.1	384704	384749	6.72091	4.5855	+	NC_005835.1	384083	385250	TT_RS02010	+
NC_005835.1	1797259	1797319	6.72091	4.5855	+	NC_005835.1	1796199	1797633	TT_RS09610	+
NC_005835.1	1073308	1073368	7.7112	4.58077	+	NC_005835.1	1071778	1076257	TT_RS05580	+
NC_005835.1	1265955	1265996	23.6309	4.57699	-	NC_005835.1	1265393	1266011	TT_RS06695	-
NC_005835.1	1511334	1511418	19.8408	4.57124	+	NC_005835.1	1510172	1512530	TT_RS08065	+
NC_005835.1	399656	399704	4.36952	4.57121	-	NC_005835.1	398744	399836	TT_RS02085	-
NC_005835.1	1282354	1282392	4.36952	4.57121	+	NC_005835.1	1282105	1282897	TT_RS06805	+
NC_005835.1	236780	236812	65.1422	4.56388	+	NC_005835.1	236742	236819	TT_RS01260	+
NC_005835.1	1667679	1667756	17.7234	4.56155	-	NC_005835.1	1667031	1668135	TT_RS08940	-
NC_005835.1	357190	357221	6.10626	4.55664	+	NC_005835.1	356873	358250	TT_RS01885	+
NC_005835.1	789504	789534	4.19979	4.55664	-	NC_005835.1	788794	789559	TT_RS04085	-
NC_005835.1	967117	967156	54.2972	4.5514	+	NC_005835.1	967095	967389	TT_RS04970	+
NC_005835.1	1644756	1644810	14.825	4.54179	-	NC_005835.1	1644647	1645466	TT_RS08770	-
NC_005835.1	728660	728706	10.0481	4.54178	+	NC_005835.1	728646	729747	TT_RS03780	+
NC_005835.1	657304	657345	8.82099	4.54177	-	NC_005835.1	656947	657436	TT_RS03415	-
NC_005835.1	549049	549094	6.22117	4.54177	-	NC_005835.1	548994	550206	TT_RS02855	-
NC_005835.1	1284081	1284129	6.39519	4.54177	+	NC_005835.1	1283894	1284284	TT_RS06820	+
NC_005835.1	1683034	1683082	14.7771	4.53956	-	NC_005835.1	1682778	1683156	TT_RS09035	-
NC_005835.1	1265674	1265695	8.63184	4.53041	-	NC_005835.1	1265393	1266011	TT_RS06695	-
NC_005835.1	901633	901685	8.36403	4.52145	-	NC_005835.1	901403	902432	TT_RS04660	-
NC_005835.1	171563	171597	5.30848	4.52145	+	NC_005835.1	170972	172163	TT_RS00970	+
NC_005835.1	797694	797752	13.7903	4.51421	-	NC_005835.1	797075	797921	TT_RS04115	-
NC_005835.1	1082762	1082797	5.78523	4.50318	-	NC_005835.1	1082334	1083162	TT_RS05615	-
NC_005835.1	1868243	1868333	11.913	4.50055	-	NC_005835.1	1868031	1868484	TT_RS09990	-
NC_005835.1	374496	374540	13.0315	4.49523	-	NC_005835.1	374161	376087	TT_RS01960	-
NC_005835.1	1824623	1824662	7.91146	4.49522	-	NC_005835.1	1824391	1825708	TT_RS09750	-
NC_005835.1	1625711	1625767	6.07085	4.49521	-	NC_005835.1	1625111	1626359	TT_RS08680	-
NC_005835.1	1758595	1758719	22.9532	4.49351	-	NC_005835.1	1758105	1759242	TT_RS09425	-
NC_005835.1	1015587	1015622	6.69174	4.479	-	NC_005835.1	1015149	1015836	TT_RS05260	-
NC_005835.1	1151344	1151399	5.51347	4.479	-	NC_005835.1	1150473	1151397	TT_RS05985	-
NC_005835.1	1752269	1752305	12.9431	4.46911	+	NC_005835.1	1752087	1753278	TT_RS09385	+
NC_005835.1	1454455	1454502	42.8123	4.46388	-	NC_005835.1	1454320	1457167	TT_RS07725	-
NC_005835.1	1608162	1608229	20.5119	4.46004	+	NC_005835.1	1608150	1608519	TT_RS08600	+
NC_005835.1	765674	765711	13.8279	4.46004	-	NC_005835.1	765537	765999	TT_RS03965	-
NC_005835.1	161482	161514	5.42425	4.44544	+	NC_005835.1	161449	161761	TT_RS00910	+
NC_005835.1	1540953	1540966	4.76618	4.44544	-	NC_005835.1	1540759	1541845	TT_RS08210	-
NC_005835.1	40310	40339	3.84158	4.44544	-	NC_005835.1	39581	40775	TT_RS00210	-
NC_005835.1	1630822	1630874	39.9666	4.43893	+	NC_005835.1	1630034	1631666	TT_RS08700	+
NC_005835.1	383844	383939	11.1551	4.43391	+	NC_005835.1	383808	384084	TT_RS02005	+
NC_005835.1	1252741	1252778	29.1944	4.42614	-	NC_005835.1	1252578	1253526	TT_RS06560	-
NC_005838.1	54510	54534	4.69501	4.41025	+	NC_005838.1	53951	55121	TT_RS10435	+
NC_005835.1	1016509	1016539	4.47333	4.41025	-	NC_005835.1	1015897	1016563	TT_RS05265	-
NC_005835.1	674542	674612	11.5999	4.34749	+	NC_005835.1	673650	674964	TT_RS03515	+
NC_005835.1	1634700	1634744	4.39289	4.34748	+	NC_005835.1	1634429	1634933	TT_RS08715	+
NC_005835.1	1459271	1459301	9.22934	4.33958	+	NC_005835.1	1457667	1459482	TT_RS07730	+
NC_005835.1	508003	508057	5.10798	4.33425	-	NC_005835.1	507324	508497	TT_RS02660	-
NC_005835.1	527198	527236	4.95006	4.33425	+	NC_005835.1	527175	527424	TT_RS02740	+
NC_005835.1	1076491	1076541	4.77819	4.31393	+	NC_005835.1	1076434	1077046	TT_RS05585	+
NC_005835.1	289713	289749	4.83539	4.31393	-	NC_005835.1	288793	289993	TT_RS01540	-
NC_005835.1	503499	503529	5.89814	4.30703	-	NC_005835.1	503268	504534	TT_RS02635	-
NC_005835.1	1428826	1428921	17.4203	4.26254	-	NC_005835.1	1428253	1428958	TT_RS07585	-
NC_005835.1	1489095	1489169	16.637	4.24284	-	NC_005835.1	1488883	1489366	TT_RS07935	-
NC_005835.1	1385360	1385441	25.1793	4.24176	-	NC_005835.1	1382491	1385851	TT_RS07385	-
NC_005838.1	149697	149763	4.52449	4.23792	+	NC_005838.1	149595	152447	TT_RS10860	+
NC_005835.1	1274442	1274499	16.7413	4.23631	-	NC_005835.1	1273978	1275334	TT_RS06755	-
NC_005835.1	256737	256774	9.16607	4.22897	-	NC_005835.1	256248	256815	TT_RS01370	-
NC_005835.1	1649592	1649621	125.628	4.21864	+	NC_005835.1	1649588	1649674	TT_RS08805	+
NC_005835.1	177406	177491	8.06589	4.21859	-	NC_005835.1	176953	177499	TT_RS01000	-
NC_005835.1	1223345	1223466	35.9067	4.2155	-	NC_005835.1	1222891	1223902	TT_RS06410	-
NC_005835.1	493349	493399	14.3402	4.2123	-	NC_005835.1	492935	493706	TT_RS02580	-
NC_005835.1	401179	401227	5.55426	4.2107	+	NC_005835.1	400939	401932	TT_RS02095	+
NC_005835.1	1819912	1819984	5.55426	4.2107	-	NC_005835.1	1819863	1820403	TT_RS09730	-
NC_005835.1	53796	53820	7.5858	4.16574	+	NC_005835.1	53513	54557	TT_RS00295	+
NC_005835.1	840889	840923	222.859	4.16083	-	NC_005835.1	840875	840962	TT_RS04375	-
NC_005835.1	853158	853184	6.7981	4.15297	-	NC_005835.1	853019	853241	TT_RS04445	-
NC_005835.1	1628920	1628957	4.21735	4.15296	+	NC_005835.1	1628836	1629619	TT_RS08690	+
NC_005835.1	397222	397275	7.00434	4.13206	-	NC_005835.1	396020	397286	TT_RS02070	-
NC_005835.1	1832547	1832605	6.94366	4.11777	+	NC_005835.1	1832442	1833162	TT_RS09810	+
NC_005835.1	987936	987956	184.794	4.10632	+	NC_005835.1	987922	987999	TT_RS05100	+
NC_005835.1	819902	819947	3.85914	4.04176	-	NC_005835.1	819356	819956	TT_RS04255	-
NC_005835.1	1729377	1729428	259.826	4.0289	-	NC_005835.1	1729380	1729467	TT_RS09275	-
NC_005835.1	1729377	1729428	259.826	4.0289	-	NC_005835.1	1728911	1729424	TT_RS09270	-
NC_005835.1	1061527	1061582	16.2521	4.00122	+	NC_005835.1	1061506	1061950	TT_RS05520	+
NC_005835.1	333764	333820	5.79406	3.91624	-	NC_005835.1	332905	334621	TT_RS01765	-
NC_005835.1	660264	660282	4.26839	3.91025	-	NC_005835.1	659889	660318	TT_RS03440	-
NC_005835.1	219515	219551	7.36184	3.88935	-	NC_005835.1	218822	219776	TT_RS01170	-
NC_005835.1	1800084	1800120	4.05883	3.86048	+	NC_005835.1	1799784	1800447	TT_RS09625	+
NC_005835.1	1775285	1775321	37.0985	3.79633	+	NC_005835.1	1774544	1775453	TT_RS09530	+
NC_005835.1	1252826	1252926	64.4793	3.7656	-	NC_005835.1	1252578	1253526	TT_RS06560	-
NC_005835.1	1142033	1142083	6.44814	3.74929	-	NC_005835.1	1141899	1143486	TT_RS05935	-
NC_005838.1	51644	51687	4.12266	3.74928	+	NC_005838.1	51634	52504	TT_RS10425	+
NC_005838.1	50339	50388	11.5539	3.74704	-	NC_005838.1	50100	50688	TT_RS10415	-
NC_005835.1	360771	360828	4.84473	3.70273	-	NC_005835.1	359747	362456	TT_RS01900	-
NC_005835.1	1614981	1615020	20.4378	3.68789	+	NC_005835.1	1614584	1615952	TT_RS08630	+
NC_005835.1	460047	460080	4.55585	3.61777	-	NC_005835.1	459455	460400	TT_RS02390	-
NC_005835.1	1831790	1831821	234.972	3.60287	+	NC_005835.1	1831790	1831866	TT_RS09800	+
NC_005835.1	1347758	1347789	264.334	3.58918	-	NC_005835.1	1347713	1347789	TT_RS07190	-
NC_005835.1	1455357	1455421	40.9416	3.407	-	NC_005835.1	1454320	1457167	TT_RS07725	-
NC_005835.1	1144036	1144047	35.9604	3.38884	+	NC_005835.1	1143996	1144073	TT_RS05945	+
NC_005835.1	565726	565793	5.26414	3.38081	-	NC_005835.1	564795	565833	TT_RS02955	-
NC_005835.1	1015666	1015690	4.01498	3.04177	-	NC_005835.1	1015149	1015836	TT_RS05260	-
