# Supplementary material
Source: HighWire-hosted journal article supplement (doi:10.1101/rna.075580.120)
Supplement: Supplemental_Table_4.xlsx [file Supplemental_Table_4.xlsx]

## Sheet: 5a-12_total
Annotation Cluster 1	Enrichment Score: 11.369496822787855
Category	Term	Count	%	PValue	Genes	List Total	Pop Hits	Pop Total	Fold Enrichment	Bonferroni	Benjamini	FDR
SP_PIR_KEYWORDS	ribosomal protein	48	4.42804	2.37395e-17	RL36_THET2, RS8_THET2, RL4_THET2, RS4_THET2, RL10_THET2, RL13_THET2, RL11_THET2, RS9_THET2, RS17_THET2, RL18_THET2, RS13_THET2, RL6_THET2, RL23_THET2, RS6_THET2, RS3_THET2, RS5_THET2, RS11_THET2, RL25_THET2, RL14_THET2, RL28_THET2, RS18_THET2, RS20_THET2, RL35_THET2, RL33_THET2, RL21_THET2, RL1_THET2, RL27_THET2, RL16_THET2, RS14Z_THET2, RL32_THET2, RL9_THET2, Q72GM4_THET2, RL29_THET2, Q72HE6_THE…	1084	61	4254	3.08802	4.43928e-15	4.43928e-15	2.94273e-14
SP_PIR_KEYWORDS	ribonucleoprotein	45	4.15129	8.17031e-16	RL36_THET2, RS8_THET2, RL4_THET2, RS4_THET2, RL10_THET2, RL13_THET2, RL11_THET2, RS9_THET2, RS17_THET2, RL18_THET2, RS13_THET2, RL6_THET2, RL23_THET2, RS6_THET2, RS3_THET2, RS5_THET2, RS11_THET2, RL25_THET2, RL14_THET2, RL28_THET2, RS18_THET2, RS20_THET2, RL35_THET2, RL33_THET2, RL1_THET2, RL21_THET2, RL27_THET2, RL16_THET2, RS14Z_THET2, RL32_THET2, RL9_THET2, RL29_THET2, RL17_THET2, RL20_THET2, …	1084	58	4254	3.04476	1.45328e-13	7.26086e-14	9.65894e-13
GOTERM_BP_FAT	GO:0006412~translation	82	7.56458	1.57823e-15	Q72GJ6_THET2, SYD_THET2, RL10_THET2, RS9_THET2, RS17_THET2, SYFB_THET2, RL18_THET2, SYP_THET2, SYS_THET2, DEF_THET2, RL23_THET2, SYA_THET2, RS3_THET2, RS11_THET2, GATB_THET2, RL14_THET2, RS18_THET2, RL33_THET2, SYFA_THET2, SYG_THET2, Q72JB4_THET2, RL27_THET2, SYH_THET2, SYI_THET2, RL9_THET2, RL29_THET2, IF2_THET2, IF1_THET2, RS15_THET2, RL7_THET2, RL2_THET2, RL19_THET2, EFTS_THET2, RF1_THET2, RRF…	582	121	1772	2.06333	9.9476e-13	9.9476e-13	2.32037e-12
KEGG_PATHWAY	tth03010:Ribosome	46	4.24354	3.29948e-14	RL36_THET2, RS8_THET2, RL4_THET2, RS4_THET2, RL10_THET2, RL13_THET2, RL11_THET2, RS9_THET2, RS17_THET2, RL18_THET2, RS13_THET2, RL6_THET2, RL23_THET2, RS6_THET2, RS3_THET2, RS5_THET2, RS11_THET2, RL25_THET2, RL14_THET2, RL28_THET2, RS18_THET2, RS20_THET2, RL35_THET2, RL33_THET2, RL21_THET2, RL1_THET2, RL27_THET2, RL16_THET2, RS14Z_THET2, RL32_THET2, RL9_THET2, Q72GM4_THET2, RL29_THET2, RL17_THET2…	454	52	1244	2.42392	4.22062e-12	4.22062e-12	3.82916e-11
GOTERM_MF_FAT	GO:0003735~structural constituent of ribosome	45	4.15129	3.78785e-13	RL36_THET2, RS8_THET2, RL4_THET2, RS4_THET2, RL13_THET2, RL11_THET2, RS9_THET2, RS17_THET2, RL18_THET2, RS13_THET2, RL6_THET2, RL23_THET2, RS6_THET2, RS3_THET2, RS5_THET2, RS11_THET2, RL25_THET2, RL14_THET2, RL28_THET2, RS18_THET2, RS20_THET2, RL35_THET2, RL33_THET2, RL1_THET2, RL21_THET2, RL27_THET2, RL16_THET2, RS14Z_THET2, RL32_THET2, RL9_THET2, Q72GM4_THET2, RL29_THET2, RL17_THET2, RL20_THET2…	667	56	2095	2.52396	2.67439e-10	2.67439e-10	5.7192e-10
GOTERM_CC_FAT	GO:0005840~ribosome	48	4.42804	4.08043e-13	RL36_THET2, RS8_THET2, RL4_THET2, RS4_THET2, RL10_THET2, RL13_THET2, RL11_THET2, RS9_THET2, RS17_THET2, RL18_THET2, RS13_THET2, RL6_THET2, RL23_THET2, RS6_THET2, RS3_THET2, RS5_THET2, RS11_THET2, RL25_THET2, RL14_THET2, RL28_THET2, RS18_THET2, RS20_THET2, RL35_THET2, RL33_THET2, RL21_THET2, RL1_THET2, RL27_THET2, RL16_THET2, RS14Z_THET2, RL32_THET2, RL9_THET2, Q72GM4_THET2, RL29_THET2, Q72HE6_THE…	169	62	499	2.28593	2.52964e-11	2.52964e-11	4.11737e-10
GOTERM_CC_FAT	GO:0030529~ribonucleoprotein complex	49	4.5203	4.32212e-13	RL10_THET2, RS9_THET2, RS17_THET2, RL18_THET2, RL23_THET2, RS3_THET2, RS11_THET2, RL14_THET2, RS18_THET2, RL33_THET2, RL27_THET2, RL9_THET2, RL29_THET2, RS15_THET2, RL2_THET2, RL7_THET2, RL19_THET2, Q72JU4_THET2, RL22_THET2, RS10_THET2, RL36_THET2, RS8_THET2, RL4_THET2, RS4_THET2, RL13_THET2, RL11_THET2, RS13_THET2, RL6_THET2, RS6_THET2, RS5_THET2, RL25_THET2, RS20_THET2, RL28_THET2, RL35_THET2, …	169	64	499	2.26063	2.6797e-11	1.33985e-11	4.36162e-10
GOTERM_MF_FAT	GO:0005198~structural molecule activity	46	4.24354	4.57436e-13	RL36_THET2, RS8_THET2, RL4_THET2, RS4_THET2, RL13_THET2, RL11_THET2, RS9_THET2, RS17_THET2, RL18_THET2, RS13_THET2, RL6_THET2, RL23_THET2, RS6_THET2, RS3_THET2, RS5_THET2, RS11_THET2, RL25_THET2, RL14_THET2, RL28_THET2, RS18_THET2, RS20_THET2, RL35_THET2, RL33_THET2, Q72I60_THET2, RL1_THET2, RL21_THET2, RL27_THET2, RL16_THET2, RS14Z_THET2, RL32_THET2, RL9_THET2, Q72GM4_THET2, RL29_THET2, RL17_THE…	667	58	2095	2.49108	3.22933e-10	1.61466e-10	6.90592e-10
SP_PIR_KEYWORDS	rrna-binding	35	3.22878	2.06471e-12	RS8_THET2, RL4_THET2, RS4_THET2, RL11_THET2, RS9_THET2, RS17_THET2, RL18_THET2, RS13_THET2, RL6_THET2, RL23_THET2, RS6_THET2, RS3_THET2, RS5_THET2, RS11_THET2, RL25_THET2, RL14_THET2, RS20_THET2, RS18_THET2, RL33_THET2, RL1_THET2, RL21_THET2, RL16_THET2, RS14Z_THET2, RL9_THET2, RS15_THET2, RL5_THET2, RL20_THET2, RL2_THET2, RL19_THET2, RS7_THET2, RL22_THET2, RS2_THET2, RL3_THET2, RS10_THET2, RL15_…	1084	45	4254	3.05228	3.86095e-10	1.28698e-10	2.55936e-09
GOTERM_CC_FAT	GO:0043232~intracellular non-membrane-bounded organelle	54	4.98155	3.15372e-11	Q72J57_THET2, RL10_THET2, RS9_THET2, RS17_THET2, RL18_THET2, Q72J83_THET2, RL23_THET2, RS3_THET2, RS11_THET2, RL14_THET2, RS18_THET2, RL33_THET2, Q72GB7_THET2, RL27_THET2, RL9_THET2, RL29_THET2, RS15_THET2, RL2_THET2, RL7_THET2, RL19_THET2, RL22_THET2, RS10_THET2, RS8_THET2, RL36_THET2, Q72IZ1_THET2, RL4_THET2, RS4_THET2, RL13_THET2, RL11_THET2, RS13_THET2, RL6_THET2, RS6_THET2, RS5_THET2, RL25_T…	169	79	499	2.01828	1.95531e-09	6.51769e-10	3.18258e-08
GOTERM_CC_FAT	GO:0043228~non-membrane-bounded organelle	54	4.98155	3.15372e-11	Q72J57_THET2, RL10_THET2, RS9_THET2, RS17_THET2, RL18_THET2, Q72J83_THET2, RL23_THET2, RS3_THET2, RS11_THET2, RL14_THET2, RS18_THET2, RL33_THET2, Q72GB7_THET2, RL27_THET2, RL9_THET2, RL29_THET2, RS15_THET2, RL2_THET2, RL7_THET2, RL19_THET2, RL22_THET2, RS10_THET2, RS8_THET2, RL36_THET2, Q72IZ1_THET2, RL4_THET2, RS4_THET2, RL13_THET2, RL11_THET2, RS13_THET2, RL6_THET2, RS6_THET2, RS5_THET2, RL25_T…	169	79	499	2.01828	1.95531e-09	6.51769e-10	3.18258e-08
SP_PIR_KEYWORDS	rna-binding	47	4.33579	4.62788e-10	RS8_THET2, RL4_THET2, Q72J48_THET2, RS4_THET2, RL11_THET2, RS9_THET2, RS17_THET2, SYFB_THET2, RL18_THET2, RS13_THET2, RL6_THET2, RL23_THET2, RS6_THET2, THII_THET2, RS3_THET2, SYA_THET2, RS5_THET2, RS11_THET2, RL25_THET2, RL14_THET2, PNP_THET2, RS18_THET2, RS20_THET2, RL33_THET2, Q72KG4_THET2, RL21_THET2, RL1_THET2, Q72GH4_THET2, Q72K93_THET2, RL16_THET2, RS14Z_THET2, Q72GT1_THET2, RL9_THET2, RL20…	1084	79	4254	2.33474	8.65414e-08	1.73083e-08	5.73669e-07
GOTERM_MF_FAT	GO:0019843~rRNA binding	35	3.22878	1.37629e-09	RS8_THET2, RL4_THET2, RS4_THET2, RL11_THET2, RS9_THET2, RS17_THET2, RL18_THET2, RS13_THET2, RL6_THET2, RL23_THET2, RS6_THET2, RS3_THET2, RS5_THET2, RS11_THET2, RL25_THET2, RL14_THET2, RS20_THET2, RS18_THET2, RL33_THET2, RL1_THET2, RL21_THET2, RL16_THET2, RS14Z_THET2, RL9_THET2, RS15_THET2, RL5_THET2, RL20_THET2, RL2_THET2, RL19_THET2, RS7_THET2, RL22_THET2, RS2_THET2, RL3_THET2, RS10_THET2, RL15_…	667	45	2095	2.44295	9.7166e-07	3.23887e-07	2.0779e-06
KEGG_PATHWAY	ttj03010:Ribosome	42	3.87454	1.27429e-07	RL36_THET2, RS8_THET2, RL4_THET2, RS4_THET2, RL10_THET2, RL13_THET2, RL11_THET2, RS9_THET2, RS17_THET2, RL18_THET2, RS13_THET2, RL6_THET2, RL23_THET2, RS6_THET2, RS3_THET2, RS5_THET2, RL14_THET2, RL28_THET2, RS18_THET2, RS20_THET2, RL35_THET2, RL33_THET2, RL1_THET2, RL21_THET2, RL27_THET2, RL16_THET2, RS14Z_THET2, RL32_THET2, RL9_THET2, Q72GM4_THET2, RL17_THET2, RL20_THET2, RL5_THET2, RS15_THET2,…	454	59	1244	1.95057	1.63107e-05	4.07771e-06	0.000147987
GOTERM_MF_FAT	GO:0003723~RNA binding	60	5.53506	0.000557484	Q72H04_THET2, Q72LI5_THET2, RS9_THET2, RS17_THET2, SYFB_THET2, RL18_THET2, RL23_THET2, RS3_THET2, RS11_THET2, RL14_THET2, RS18_THET2, Q72JT4_THET2, RL33_THET2, NUSB_THET2, Q72K93_THET2, TRUD_THET2, Q72GT1_THET2, RL9_THET2, IF1_THET2, RS15_THET2, RL2_THET2, RL19_THET2, Q72GK1_THET2, Q72JU4_THET2, Q72JF4_THET2, RL22_THET2, TRUB_THET2, RS10_THET2, Q72KE6_THET2, RS8_THET2, RL4_THET2, Q72J48_THET2, RS…	667	130	2095	1.44966	0.325439	0.0757185	0.838381
Annotation Cluster 2	Enrichment Score: 3.7749037591437613
Category	Term	Count	%	PValue	Genes	List Total	Pop Hits	Pop Total	Fold Enrichment	Bonferroni	Benjamini	FDR
SP_PIR_KEYWORDS	protein biosynthesis	39	3.59779	1.18558e-10	EFTU_THET2, RS8_THET2, Q72J48_THET2, SYD_THET2, Q72IP5_THET2, SYFB_THET2, SYP_THET2, SYK_THET2, SYS_THET2, RL6_THET2, DEF_THET2, SYA_THET2, SYR_THET2, EFP_THET2, Q72GM3_THET2, GATB_THET2, SYN_THET2, SYFA_THET2, SYG_THET2, Q72JB4_THET2, FMT_THET2, SYH_THET2, SYI_THET2, SYV_THET2, EFG_THET2, IF2_THET2, IF1_THET2, RS15_THET2, Q72L79_THET2, SYC_THET2, GATA_THET2, EFTS_THET2, RF1_THET2, SYY_THET2, RRF…	1084	58	4254	2.63879	2.21703e-08	5.54257e-09	1.46963e-07
KEGG_PATHWAY	tth00970:Aminoacyl-tRNA biosynthesis	24	2.21402	4.2678e-08	SYG_THET2, SYN_THET2, SYFA_THET2, Q72JB4_THET2, Q72J48_THET2, SYD_THET2, FMT_THET2, SYH_THET2, Q72IP5_THET2, SYI_THET2, SYV_THET2, SYFB_THET2, Q72L79_THET2, SYC_THET2, SYP_THET2, GATA_THET2, SYS_THET2, SYK_THET2, SYY_THET2, SYA_THET2, SYR_THET2, GATB_THET2, Q72GM3_THET2, SYT_THET2	454	26	1244	2.52931	5.46277e-06	2.73139e-06	4.95634e-05
SP_PIR_KEYWORDS	Aminoacyl-tRNA synthetase	22	2.02952	7.69907e-06	Q72LG5_THET2, SYG_THET2, SYN_THET2, SYFA_THET2, Q72JB4_THET2, Q72J48_THET2, SYD_THET2, SYH_THET2, Q72IP5_THET2, SYI_THET2, SYV_THET2, SYFB_THET2, Q72L79_THET2, SYC_THET2, SYP_THET2, SYS_THET2, SYK_THET2, SYY_THET2, SYA_THET2, SYR_THET2, Q72GM3_THET2, SYT_THET2	1084	34	4254	2.53929	0.0014387	0.000143963	0.00954329
SP_PIR_KEYWORDS	ligase	51	4.7048	2.04459e-05	Q72H76_THET2, SYD_THET2, Q72HE9_THET2, PURQ_THET2, Q72JQ4_THET2, SYFB_THET2, SYP_THET2, PURA_THET2, SYS_THET2, SYA_THET2, GATB_THET2, SYG_THET2, SYFA_THET2, Q72JB4_THET2, SYH_THET2, SYI_THET2, MURD_THET2, Q72JL4_THET2, DDL_THET2, Q72GP5_THET2, Q72J06_THET2, GUAA_THET2, SYT_THET2, ACSA_THET2, ACCD_THET2, PANC_THET2, Q72J48_THET2, PURL_THET2, Q72IP5_THET2, Q72GY5_THET2, SYK_THET2, Q72II1_THET2, CAR…	1084	116	4254	1.72536	0.00381612	0.000347523	0.0253416
GOTERM_MF_FAT	GO:0016875~ligase activity, forming carbon-oxygen bonds	22	2.02952	0.000486291	Q72LG5_THET2, SYG_THET2, SYN_THET2, SYFA_THET2, Q72JB4_THET2, Q72J48_THET2, SYD_THET2, SYH_THET2, Q72IP5_THET2, SYI_THET2, SYV_THET2, SYFB_THET2, Q72L79_THET2, SYC_THET2, SYP_THET2, SYS_THET2, SYK_THET2, SYY_THET2, SYA_THET2, SYR_THET2, Q72GM3_THET2, SYT_THET2	667	35	2095	1.9743	0.290649	0.0822692	0.731683
GOTERM_MF_FAT	GO:0016876~ligase activity, forming aminoacyl-tRNA and related compounds	22	2.02952	0.000486291	Q72LG5_THET2, SYG_THET2, SYN_THET2, SYFA_THET2, Q72JB4_THET2, Q72J48_THET2, SYD_THET2, SYH_THET2, Q72IP5_THET2, SYI_THET2, SYV_THET2, SYFB_THET2, Q72L79_THET2, SYC_THET2, SYP_THET2, SYS_THET2, SYK_THET2, SYY_THET2, SYA_THET2, SYR_THET2, Q72GM3_THET2, SYT_THET2	667	35	2095	1.9743	0.290649	0.0822692	0.731683
GOTERM_MF_FAT	GO:0004812~aminoacyl-tRNA ligase activity	22	2.02952	0.000486291	Q72LG5_THET2, SYG_THET2, SYN_THET2, SYFA_THET2, Q72JB4_THET2, Q72J48_THET2, SYD_THET2, SYH_THET2, Q72IP5_THET2, SYI_THET2, SYV_THET2, SYFB_THET2, Q72L79_THET2, SYC_THET2, SYP_THET2, SYS_THET2, SYK_THET2, SYY_THET2, SYA_THET2, SYR_THET2, Q72GM3_THET2, SYT_THET2	667	35	2095	1.9743	0.290649	0.0822692	0.731683
GOTERM_BP_FAT	GO:0043038~amino acid activation	21	1.93727	0.00144631	SYG_THET2, SYN_THET2, SYFA_THET2, Q72JB4_THET2, Q72J48_THET2, SYD_THET2, SYH_THET2, Q72IP5_THET2, SYI_THET2, SYV_THET2, SYFB_THET2, Q72L79_THET2, SYC_THET2, SYP_THET2, SYS_THET2, SYK_THET2, SYY_THET2, SYA_THET2, SYR_THET2, Q72GM3_THET2, SYT_THET2	582	34	1772	1.88053	0.603986	0.370704	2.13342
GOTERM_BP_FAT	GO:0043039~tRNA aminoacylation	21	1.93727	0.00144631	SYG_THET2, SYN_THET2, SYFA_THET2, Q72JB4_THET2, Q72J48_THET2, SYD_THET2, SYH_THET2, Q72IP5_THET2, SYI_THET2, SYV_THET2, SYFB_THET2, Q72L79_THET2, SYC_THET2, SYP_THET2, SYS_THET2, SYK_THET2, SYY_THET2, SYA_THET2, SYR_THET2, Q72GM3_THET2, SYT_THET2	582	34	1772	1.88053	0.603986	0.370704	2.13342
GOTERM_BP_FAT	GO:0006418~tRNA aminoacylation for protein translation	21	1.93727	0.00144631	SYG_THET2, SYN_THET2, SYFA_THET2, Q72JB4_THET2, Q72J48_THET2, SYD_THET2, SYH_THET2, Q72IP5_THET2, SYI_THET2, SYV_THET2, SYFB_THET2, Q72L79_THET2, SYC_THET2, SYP_THET2, SYS_THET2, SYK_THET2, SYY_THET2, SYA_THET2, SYR_THET2, Q72GM3_THET2, SYT_THET2	582	34	1772	1.88053	0.603986	0.370704	2.13342
GOTERM_BP_FAT	GO:0006399~tRNA metabolic process	34	3.13653	0.00433329	Q72HF3_THET2, TRMFO_THET2, MIAA_THET2, Q72J48_THET2, SYD_THET2, Q72IP5_THET2, QUEA_THET2, SYFB_THET2, TRUA_THET2, MNMG_THET2, SYP_THET2, SYS_THET2, SYK_THET2, MNME_THET2, SYA_THET2, SYR_THET2, Q72GM3_THET2, SYN_THET2, SYFA_THET2, Q72G66_THET2, SYG_THET2, Q72JB4_THET2, TGT_THET2, TRUD_THET2, SYH_THET2, SYI_THET2, SYV_THET2, TRMI_THET2, Q72L79_THET2, SYC_THET2, SYY_THET2, TRUB_THET2, SYT_THET2, TRM…	582	68	1772	1.52234	0.93792	0.604041	6.26559
INTERPRO	IPR006195:Aminoacyl-tRNA synthetase, class II, conserved region	10	0.922509	0.00840058	SYFA_THET2, SYG_THET2, SYN_THET2, SYP_THET2, SYK_THET2, SYS_THET2, SYD_THET2, SYH_THET2, Q72IP5_THET2, SYT_THET2	965	15	3493	2.41313	0.999999	0.999999	13.2039
GOTERM_BP_FAT	GO:0034660~ncRNA metabolic process	39	3.59779	0.00998049	Q72HF3_THET2, Q72L94_THET2, TRMFO_THET2, MIAA_THET2, Q72J48_THET2, SYD_THET2, RSMG_THET2, Q72IP5_THET2, QUEA_THET2, SYFB_THET2, TRUA_THET2, MNMG_THET2, SYP_THET2, SYK_THET2, SYS_THET2, RLMN_THET2, MNME_THET2, SYA_THET2, SYR_THET2, Q72K73_THET2, Q72GM3_THET2, SYN_THET2, SYFA_THET2, Q72G66_THET2, SYG_THET2, Q72JB4_THET2, TGT_THET2, SYH_THET2, TRUD_THET2, SYI_THET2, SYV_THET2, TRMI_THET2, Q72L79_THE…	582	84	1772	1.4136	0.998371	0.799091	13.8821
KEGG_PATHWAY	ttj00970:Aminoacyl-tRNA biosynthesis	14	1.29151	0.140742	SYFA_THET2, SYN_THET2, SYD_THET2, SYH_THET2, Q72IP5_THET2, SYI_THET2, SYV_THET2, GATA_THET2, SYC_THET2, SYK_THET2, SYA_THET2, SYR_THET2, GATB_THET2, Q72GM3_THET2	454	27	1244	1.42079	1	0.51281	82.8226
Annotation Cluster 3	Enrichment Score: 2.282686960397359
Category	Term	Count	%	PValue	Genes	List Total	Pop Hits	Pop Total	Fold Enrichment	Bonferroni	Benjamini	FDR
SP_PIR_KEYWORDS	nucleotide-binding	132	12.1771	8.7454e-08	Q72H76_THET2, MIAA_THET2, RECA_THET2, Q72HE9_THET2, Q72IA2_THET2, Q72IA4_THET2, PURQ_THET2, Q72IY3_THET2, Q72G91_THET2, Q72J05_THET2, KGUA_THET2, PURA_THET2, HIS1_THET2, SYP_THET2, SYS_THET2, Q72GJ8_THET2, Q72KF9_THET2, SYA_THET2, Q72G97_THET2, Q72GB7_THET2, SYFA_THET2, SYG_THET2, CH60_THET2, PGK_THET2, Q72J11_THET2, Q72GB4_THET2, DDL_THET2, HIS2_THET2, Q72L52_THET2, Q72JP4_THET2, Q72LF8_THET2, I…	1084	347	4254	1.49284	1.63538e-05	2.33627e-06	0.000108407
SP_PIR_KEYWORDS	atp-binding	121	11.1624	6.01324e-07	Q72H76_THET2, MIAA_THET2, RECA_THET2, Q72HE9_THET2, Q72IA2_THET2, Q72IA4_THET2, PURQ_THET2, Q72IY3_THET2, Q72G91_THET2, Q72J05_THET2, KGUA_THET2, HIS1_THET2, SYP_THET2, Q72HJ8_THET2, SYS_THET2, Q72GJ8_THET2, Q72H73_THET2, Q72KF9_THET2, SYA_THET2, Q72G97_THET2, Q72GB7_THET2, SYFA_THET2, SYG_THET2, CH60_THET2, PGK_THET2, Q72J11_THET2, Q72GB4_THET2, DDL_THET2, HIS2_THET2, Q72L52_THET2, Q72LF8_THET2,…	1084	321	4254	1.47927	0.000112441	1.24941e-05	0.000745394
GOTERM_MF_FAT	GO:0000166~nucleotide binding	205	18.9114	0.00799764	MIAA_THET2, RECA_THET2, Q72IA2_THET2, MURB_THET2, Q72IY3_THET2, LEU3_THET2, Q72GA8_THET2, Q72J05_THET2, SYP_THET2, SYS_THET2, Q72IH4_THET2, NPD_THET2, Q72LD0_THET2, SYA_THET2, Q72JI3_THET2, SYFA_THET2, Q72K32_THET2, CH60_THET2, PGK_THET2, Q72JH4_THET2, DDL_THET2, VATD_THET2, Q72JP4_THET2, Q72GP5_THET2, Q72LJ1_THET2, Q72HS1_THET2, SYT_THET2, ACSA_THET2, EFTU_THET2, Q72IK4_THET2, PANC_THET2, Q72IP5…	667	568	2095	1.13361	0.996549	0.611258	11.4172
GOTERM_MF_FAT	GO:0032555~purine ribonucleotide binding	155	14.2989	0.0261095	Q72H76_THET2, MIAA_THET2, MUTL_THET2, RECA_THET2, Q72HE9_THET2, Q72IA2_THET2, Q72IA4_THET2, PURQ_THET2, Q72IY3_THET2, Q72J05_THET2, KGUA_THET2, PURA_THET2, HIS1_THET2, SYP_THET2, Q72HJ8_THET2, Q72IH4_THET2, SYS_THET2, Q72GJ8_THET2, Q72H73_THET2, Q72KF9_THET2, SYA_THET2, Q72G97_THET2, VATB_THET2, Q72GB7_THET2, SYG_THET2, SYFA_THET2, CH60_THET2, PGK_THET2, Q72J11_THET2, Q72GB4_THET2, DDL_THET2, HIS…	667	430	2095	1.1322	1	0.930631	32.9301
GOTERM_MF_FAT	GO:0032553~ribonucleotide binding	155	14.2989	0.0261095	Q72H76_THET2, MIAA_THET2, MUTL_THET2, RECA_THET2, Q72HE9_THET2, Q72IA2_THET2, Q72IA4_THET2, PURQ_THET2, Q72IY3_THET2, Q72J05_THET2, KGUA_THET2, PURA_THET2, HIS1_THET2, SYP_THET2, Q72HJ8_THET2, Q72IH4_THET2, SYS_THET2, Q72GJ8_THET2, Q72H73_THET2, Q72KF9_THET2, SYA_THET2, Q72G97_THET2, VATB_THET2, Q72GB7_THET2, SYG_THET2, SYFA_THET2, CH60_THET2, PGK_THET2, Q72J11_THET2, Q72GB4_THET2, DDL_THET2, HIS…	667	430	2095	1.1322	1	0.930631	32.9301
GOTERM_MF_FAT	GO:0017076~purine nucleotide binding	174	16.0517	0.0323592	Q72H76_THET2, MIAA_THET2, MUTL_THET2, RECA_THET2, Q72HE9_THET2, Q72IA2_THET2, Q72IA4_THET2, MURB_THET2, PURQ_THET2, Q72GA8_THET2, Q72IY3_THET2, Q72J05_THET2, KGUA_THET2, HIS1_THET2, SYP_THET2, PURA_THET2, MNMG_THET2, Q72HJ8_THET2, Q72IH4_THET2, SYS_THET2, Q72LD0_THET2, Q72GJ8_THET2, Q72H73_THET2, Q72KF9_THET2, SYA_THET2, Q72G97_THET2, VATB_THET2, Q72JI3_THET2, Q72GB7_THET2, SYG_THET2, SYFA_THET2,…	667	490	2095	1.11535	1	0.945138	39.1424
GOTERM_MF_FAT	GO:0032559~adenyl ribonucleotide binding	138	12.7306	0.0889935	Q72H76_THET2, MIAA_THET2, MUTL_THET2, RECA_THET2, Q72HE9_THET2, Q72IA2_THET2, Q72IA4_THET2, PURQ_THET2, Q72IY3_THET2, Q72J05_THET2, KGUA_THET2, HIS1_THET2, SYP_THET2, Q72HJ8_THET2, SYS_THET2, Q72GJ8_THET2, Q72H73_THET2, Q72KF9_THET2, SYA_THET2, Q72G97_THET2, VATB_THET2, Q72GB7_THET2, SYG_THET2, SYFA_THET2, CH60_THET2, PGK_THET2, Q72J11_THET2, Q72GB4_THET2, DDL_THET2, HIS2_THET2, Q72L52_THET2, VAT…	667	394	2095	1.10012	1	0.993666	75.5172
GOTERM_MF_FAT	GO:0005524~ATP binding	138	12.7306	0.0889935	Q72H76_THET2, MIAA_THET2, MUTL_THET2, RECA_THET2, Q72HE9_THET2, Q72IA2_THET2, Q72IA4_THET2, PURQ_THET2, Q72IY3_THET2, Q72J05_THET2, KGUA_THET2, HIS1_THET2, SYP_THET2, Q72HJ8_THET2, SYS_THET2, Q72GJ8_THET2, Q72H73_THET2, Q72KF9_THET2, SYA_THET2, Q72G97_THET2, VATB_THET2, Q72GB7_THET2, SYG_THET2, SYFA_THET2, CH60_THET2, PGK_THET2, Q72J11_THET2, Q72GB4_THET2, DDL_THET2, HIS2_THET2, Q72L52_THET2, VAT…	667	394	2095	1.10012	1	0.993666	75.5172
GOTERM_MF_FAT	GO:0001882~nucleoside binding	158	14.5756	0.101617	Q72H76_THET2, MIAA_THET2, MUTL_THET2, RECA_THET2, Q72HE9_THET2, Q72IA2_THET2, MURB_THET2, Q72IA4_THET2, PURQ_THET2, Q72GA8_THET2, Q72IY3_THET2, Q72J05_THET2, KGUA_THET2, HIS1_THET2, SYP_THET2, MNMG_THET2, Q72HJ8_THET2, SYS_THET2, Q72LD0_THET2, Q72GJ8_THET2, Q72H73_THET2, Q72KF9_THET2, SYA_THET2, Q72G97_THET2, VATB_THET2, Q72JI3_THET2, Q72GB7_THET2, SYG_THET2, SYFA_THET2, CH60_THET2, PGK_THET2, Q7…	667	457	2095	1.08592	1	0.993549	80.1678
GOTERM_MF_FAT	GO:0030554~adenyl nucleotide binding	157	14.4834	0.102014	Q72H76_THET2, MIAA_THET2, MUTL_THET2, RECA_THET2, Q72HE9_THET2, Q72IA2_THET2, MURB_THET2, Q72IA4_THET2, PURQ_THET2, Q72GA8_THET2, Q72IY3_THET2, Q72J05_THET2, KGUA_THET2, HIS1_THET2, SYP_THET2, MNMG_THET2, Q72HJ8_THET2, SYS_THET2, Q72LD0_THET2, Q72GJ8_THET2, Q72H73_THET2, Q72KF9_THET2, SYA_THET2, Q72G97_THET2, VATB_THET2, Q72JI3_THET2, Q72GB7_THET2, SYG_THET2, SYFA_THET2, CH60_THET2, PGK_THET2, Q7…	667	454	2095	1.08618	1	0.99133	80.2997
GOTERM_MF_FAT	GO:0001883~purine nucleoside binding	157	14.4834	0.102014	Q72H76_THET2, MIAA_THET2, MUTL_THET2, RECA_THET2, Q72HE9_THET2, Q72IA2_THET2, MURB_THET2, Q72IA4_THET2, PURQ_THET2, Q72GA8_THET2, Q72IY3_THET2, Q72J05_THET2, KGUA_THET2, HIS1_THET2, SYP_THET2, MNMG_THET2, Q72HJ8_THET2, SYS_THET2, Q72LD0_THET2, Q72GJ8_THET2, Q72H73_THET2, Q72KF9_THET2, SYA_THET2, Q72G97_THET2, VATB_THET2, Q72JI3_THET2, Q72GB7_THET2, SYG_THET2, SYFA_THET2, CH60_THET2, PGK_THET2, Q7…	667	454	2095	1.08618	1	0.99133	80.2997
Annotation Cluster 4	Enrichment Score: 1.3873036075188772
Category	Term	Count	%	PValue	Genes	List Total	Pop Hits	Pop Total	Fold Enrichment	Bonferroni	Benjamini	FDR
KEGG_PATHWAY	tth00190:Oxidative phosphorylation	27	2.49077	1.01459e-05	Q72H24_THET2, VATB_THET2, VATA_THET2, Q72GC8_THET2, Q72GE1_THET2, Q72H95_THET2, NUOC_THET2, VATE_THET2, Q72J68_THET2, Q72GD3_THET2, VATC_THET2, Q72GE0_THET2, Q746J9_THET2, NUOI_THET2, COXX_THET2, VATD_THET2, Q72JK2_THET2, Q72GD7_THET2, Q72GD4_THET2, Q72GD9_THET2, Q72IP3_THET2, Q72HC8_THET2, NUOD_THET2, Q72J67_THET2, Q72LK2_THET2, Q72H23_THET2, Q72GD2_THET2	454	36	1244	2.05507	0.00129783	0.000216423	0.0117821
GOTERM_MF_FAT	GO:0016651~oxidoreductase activity, acting on NADH or NADPH	19	1.75277	0.126175	Q72HD8_THET2, Q72GC8_THET2, Q72GE1_THET2, Q72GS0_THET2, NUOC_THET2, Q72JC5_THET2, Q72GR9_THET2, Q72GD3_THET2, NUOI_THET2, Q746J9_THET2, Q72GE0_THET2, Q72GD7_THET2, Q72KK6_THET2, Q72GD4_THET2, Q72GD9_THET2, Q72GL5_THET2, NUOD_THET2, Q72LK2_THET2, Q72GD2_THET2	667	44	2095	1.35631	1	0.994959	86.9493
GOTERM_MF_FAT	GO:0016655~oxidoreductase activity, acting on NADH or NADPH, quinone or similar compound as acceptor	14	1.29151	0.185379	NUOI_THET2, Q72GE0_THET2, Q746J9_THET2, Q72GD7_THET2, Q72KK6_THET2, Q72GD4_THET2, Q72GC8_THET2, Q72GE1_THET2, Q72GD9_THET2, NUOC_THET2, Q72GL5_THET2, NUOD_THET2, Q72GD3_THET2, Q72GD2_THET2	667	32	2095	1.37416	1	0.998152	95.475
GOTERM_MF_FAT	GO:0008137~NADH dehydrogenase (ubiquinone) activity	10	0.922509	0.193142	Q746J9_THET2, Q72GE0_THET2, Q72GD7_THET2, Q72GC8_THET2, Q72GD4_THET2, Q72GE1_THET2, Q72GD9_THET2, NUOC_THET2, Q72GD3_THET2, Q72GD2_THET2	667	21	2095	1.49568	1	0.998187	96.084
GOTERM_MF_FAT	GO:0003954~NADH dehydrogenase activity	13	1.19926	0.300248	NUOI_THET2, Q72GE0_THET2, Q746J9_THET2, Q72GD7_THET2, Q72GD4_THET2, Q72GC8_THET2, Q72GE1_THET2, Q72GD9_THET2, NUOC_THET2, NUOD_THET2, Q72GD3_THET2, Q72LK2_THET2, Q72GD2_THET2	667	32	2095	1.276	1	0.999255	99.544
GOTERM_MF_FAT	GO:0050136~NADH dehydrogenase (quinone) activity	12	1.10701	0.344745	NUOI_THET2, Q746J9_THET2, Q72GE0_THET2, Q72GD7_THET2, Q72GC8_THET2, Q72GD4_THET2, Q72GE1_THET2, Q72GD9_THET2, NUOC_THET2, NUOD_THET2, Q72GD3_THET2, Q72GD2_THET2	667	30	2095	1.25637	1	0.999525	99.8309
Annotation Cluster 5	Enrichment Score: 1.192766434400273
Category	Term	Count	%	PValue	Genes	List Total	Pop Hits	Pop Total	Fold Enrichment	Bonferroni	Benjamini	FDR
SP_PIR_KEYWORDS	metal-binding	78	7.19557	3.25493e-05	LYSK_THET2, Q72KC7_THET2, Q72IU8_THET2, Q72LJ5_THET2, RUVC_THET2, LEU3_THET2, FPG_THET2, ENO_THET2, Q72G91_THET2, HISX_THET2, SYFB_THET2, Q72J83_THET2, PURA_THET2, Q72H65_THET2, NPD_THET2, DEF_THET2, Q72LB5_THET2, CCME_THET2, GLMM_THET2, SYFA_THET2, TGT_THET2, SURE1_THET2, AROK_THET2, SYI_THET2, ODBA_THET2, ILVD_THET2, DDL_THET2, HEMH_THET2, ISPG_THET2, Q72GD4_THET2, DNAJ_THET2, LEUC_THET2, PSUG_…	1084	202	4254	1.51534	0.00606834	0.000507107	0.0403404
GOTERM_MF_FAT	GO:0046872~metal ion binding	124	11.4391	0.260228	Q72LK4_THET2, Q72IG9_THET2, MIAA_THET2, Q72L36_THET2, LEU3_THET2, FPG_THET2, Q72JG2_THET2, Q72JG9_THET2, Q72J83_THET2, PURA_THET2, NPD_THET2, CCME_THET2, Q72KF9_THET2, Q72LG2_THET2, Q72JI3_THET2, Q72K12_THET2, SYFA_THET2, Q72G87_THET2, TGT_THET2, Q72I58_THET2, Q72LL5_THET2, ODBA_THET2, DDL_THET2, ISPG_THET2, HEMH_THET2, DNAJ_THET2, LEUC_THET2, Q746J6_THET2, Q72GR2_THET2, Q72HS2_THET2, Q72IU7_THET…	667	369	2095	1.05549	1	0.998706	98.944
GOTERM_MF_FAT	GO:0043169~cation binding	124	11.4391	0.477525	Q72LK4_THET2, Q72IG9_THET2, MIAA_THET2, Q72L36_THET2, LEU3_THET2, FPG_THET2, Q72JG2_THET2, Q72JG9_THET2, Q72J83_THET2, PURA_THET2, NPD_THET2, CCME_THET2, Q72KF9_THET2, Q72LG2_THET2, Q72JI3_THET2, Q72K12_THET2, SYFA_THET2, Q72G87_THET2, TGT_THET2, Q72I58_THET2, Q72LL5_THET2, ODBA_THET2, DDL_THET2, ISPG_THET2, HEMH_THET2, DNAJ_THET2, LEUC_THET2, Q746J6_THET2, Q72GR2_THET2, Q72HS2_THET2, Q72IU7_THET…	667	384	2095	1.01426	1	0.999913	99.9945
GOTERM_MF_FAT	GO:0043167~ion binding	124	11.4391	0.477525	Q72LK4_THET2, Q72IG9_THET2, MIAA_THET2, Q72L36_THET2, LEU3_THET2, FPG_THET2, Q72JG2_THET2, Q72JG9_THET2, Q72J83_THET2, PURA_THET2, NPD_THET2, CCME_THET2, Q72KF9_THET2, Q72LG2_THET2, Q72JI3_THET2, Q72K12_THET2, SYFA_THET2, Q72G87_THET2, TGT_THET2, Q72I58_THET2, Q72LL5_THET2, ODBA_THET2, DDL_THET2, ISPG_THET2, HEMH_THET2, DNAJ_THET2, LEUC_THET2, Q746J6_THET2, Q72GR2_THET2, Q72HS2_THET2, Q72IU7_THET…	667	384	2095	1.01426	1	0.999913	99.9945
GOTERM_MF_FAT	GO:0046914~transition metal ion binding	83	7.65683	0.562703	LYSK_THET2, Q72IG9_THET2, Q72LD2_THET2, Q72IU8_THET2, Q72IS4_THET2, LEU3_THET2, FPG_THET2, Q72JG9_THET2, HISX_THET2, Q72J83_THET2, NPD_THET2, DEF_THET2, CCME_THET2, Q72LG2_THET2, Q72H24_THET2, HSLO_THET2, Q72JI3_THET2, Q72K12_THET2, Q72KH9_THET2, TGT_THET2, SYI_THET2, ILVD_THET2, DDL_THET2, Q72JK2_THET2, HEMH_THET2, ISPG_THET2, Q72GD4_THET2, Q72HC5_THET2, DNAJ_THET2, Q72K10_THET2, LEUC_THET2, Q74…	667	260	2095	1.00268	1	0.999919	99.9996
Annotation Cluster 6	Enrichment Score: 1.0480298170242228
Category	Term	Count	%	PValue	Genes	List Total	Pop Hits	Pop Total	Fold Enrichment	Bonferroni	Benjamini	FDR
INTERPRO	IPR005225:Small GTP-binding protein	9	0.830258	0.030821	Q72IV6_THET2, EFTU_THET2, Q72IJ8_THET2, OBG_THET2, IF2_THET2, EFG_THET2, Q72GH4_THET2, MNME_THET2	965	15	3493	2.17181	1	1	40.8743
INTERPRO	IPR006073:GTP1/OBG	5	0.461255	0.152592	Q72IV6_THET2, OBG_THET2, Q72GH4_THET2, MNME_THET2, Q72JF0_THET2	965	8	3493	2.26231	1	1	93.7919
INTERPRO	IPR002917:GTP-binding protein, HSR1-related	5	0.461255	0.152592	Q72IV6_THET2, OBG_THET2, Q72GH4_THET2, MNME_THET2, Q72JF0_THET2	965	8	3493	2.26231	1	1	93.7919
Annotation Cluster 7	Enrichment Score: 1.047089268159596
Category	Term	Count	%	PValue	Genes	List Total	Pop Hits	Pop Total	Fold Enrichment	Bonferroni	Benjamini	FDR
INTERPRO	IPR006195:Aminoacyl-tRNA synthetase, class II, conserved region	10	0.922509	0.00840058	SYFA_THET2, SYG_THET2, SYN_THET2, SYP_THET2, SYK_THET2, SYS_THET2, SYD_THET2, SYH_THET2, Q72IP5_THET2, SYT_THET2	965	15	3493	2.41313	0.999999	0.999999	13.2039
INTERPRO	IPR002314:Aminoacyl-tRNA synthetase, class II (G, H, P and S), conserved region	5	0.461255	0.287477	SYG_THET2, SYP_THET2, SYS_THET2, SYH_THET2, SYT_THET2	965	10	3493	1.80984	1	1	99.6619
INTERPRO	IPR004154:Anticodon-binding	4	0.369004	0.299102	SYG_THET2, SYP_THET2, SYH_THET2, SYT_THET2	965	7	3493	2.06839	1	1	99.7435
Annotation Cluster 8	Enrichment Score: 1.0442444691349055
Category	Term	Count	%	PValue	Genes	List Total	Pop Hits	Pop Total	Fold Enrichment	Bonferroni	Benjamini	FDR
INTERPRO	IPR006195:Aminoacyl-tRNA synthetase, class II, conserved region	10	0.922509	0.00840058	SYFA_THET2, SYG_THET2, SYN_THET2, SYP_THET2, SYK_THET2, SYS_THET2, SYD_THET2, SYH_THET2, Q72IP5_THET2, SYT_THET2	965	15	3493	2.41313	0.999999	0.999999	13.2039
INTERPRO	IPR004364:Aminoacyl-tRNA synthetase, class II (D, K and N)	4	0.369004	0.066566	SYN_THET2, SYK_THET2, SYD_THET2, Q72IP5_THET2	965	4	3493	3.61969	1	1	68.5355
INTERPRO	IPR018150:Aminoacyl-tRNA synthetase, class II (D, K and N)-like	4	0.369004	0.066566	SYN_THET2, SYK_THET2, SYD_THET2, Q72IP5_THET2	965	4	3493	3.61969	1	1	68.5355
PIR_SUPERFAMILY	PIRSF001525:lysine-tRNA ligase	4	0.369004	0.0948131	SYN_THET2, SYK_THET2, SYD_THET2, Q72IP5_THET2	677	4	2150	3.17578	1	1	77.7814
INTERPRO	IPR004365:Nucleic acid binding, OB-fold, tRNA/helicase-type	6	0.553506	0.111867	Q72G97_THET2, Q72GP2_THET2, SYN_THET2, SYK_THET2, SYD_THET2, Q72J77_THET2, Q72IP5_THET2	965	10	3493	2.17181	1	1	86.3494
INTERPRO	IPR002312:Aspartyl-tRNA synthetase, class IIb	3	0.276753	0.186379	SYN_THET2, SYD_THET2, Q72IP5_THET2	965	3	3493	3.61969	1	1	96.8642
GOTERM_MF_FAT	GO:0004815~aspartate-tRNA ligase activity	3	0.276753	0.238813	SYN_THET2, SYD_THET2, Q72IP5_THET2	667	3	2095	3.14093	1	0.998374	98.3753
GOTERM_BP_FAT	GO:0006422~aspartyl-tRNA aminoacylation	3	0.276753	0.251887	SYN_THET2, SYD_THET2, Q72IP5_THET2	582	3	1772	3.04467	1	1	98.6752
Annotation Cluster 9	Enrichment Score: 1.01781648195422
Category	Term	Count	%	PValue	Genes	List Total	Pop Hits	Pop Total	Fold Enrichment	Bonferroni	Benjamini	FDR
SP_PIR_KEYWORDS	magnesium	26	2.39852	0.0205194	PYRE_THET2, GLMM_THET2, Q72H84_THET2, SYFA_THET2, CARB_THET2, Q72IE8_THET2, MIAA_THET2, THIE_THET2, AROK_THET2, ODBA_THET2, RUVC_THET2, NFI_THET2, LEU3_THET2, DDL_THET2, ENO_THET2, Q72G91_THET2, UPP_THET2, SYFB_THET2, PANB_THET2, PURA_THET2, SYK_THET2, Q72H65_THET2, Q72JC6_THET2, MNME_THET2, METK_THET2, Q72I55_THET2	1084	67	4254	1.52288	0.979288	0.184582	22.6634
GOTERM_MF_FAT	GO:0000287~magnesium ion binding	31	2.85978	0.0916792	Q72LK4_THET2, PYRE_THET2, Q72H95_THET2, MIAA_THET2, RUVC_THET2, LEU3_THET2, ENO_THET2, SYFB_THET2, PANB_THET2, PURA_THET2, SYK_THET2, Q72H65_THET2, MNME_THET2, Q72IG0_THET2, Q72I55_THET2, GLMM_THET2, Q72H84_THET2, SYFA_THET2, CARB_THET2, Q72IE8_THET2, THIE_THET2, Q72I58_THET2, AROK_THET2, Q72LL5_THET2, ODBA_THET2, DDL_THET2, NFI_THET2, UPP_THET2, Q72H36_THET2, Q72JC6_THET2, METK_THET2	667	76	2095	1.28117	1	0.992165	76.5845
UP_SEQ_FEATURE	metal ion-binding site:Magnesium	12	1.10701	0.47002	ENO_THET2, GLMM_THET2, SYFB_THET2, SYFA_THET2, PANB_THET2, PURA_THET2, MNME_THET2, THIE_THET2, AROK_THET2, METK_THET2, ODBA_THET2, RUVC_THET2	237	26	593	1.15482	1	1	99.9864
Annotation Cluster 10	Enrichment Score: 0.9609804341367306
Category	Term	Count	%	PValue	Genes	List Total	Pop Hits	Pop Total	Fold Enrichment	Bonferroni	Benjamini	FDR
SP_PIR_KEYWORDS	Chaperone	11	1.01476	0.0328907	HSLO_THET2, CH10_THET2, DNAJ_THET2, CH60_THET2, Q72L01_THET2, GRPE_THET2, CLPX_THET2, Q72IK7_THET2, CLPB_THET2, Q72L86_THET2, DNAK_THET2, TIG_THET2	1084	22	4254	1.96218	0.998077	0.229397	33.9373
GOTERM_BP_FAT	GO:0006457~protein folding	10	0.922509	0.175034	HSLO_THET2, Q72H58_THET2, CH10_THET2, DNAJ_THET2, CH60_THET2, GRPE_THET2, CLPX_THET2, Q72IK7_THET2, DNAK_THET2, Q72H64_THET2, TIG_THET2	582	20	1772	1.52234	1	1	94.3124
GOTERM_MF_FAT	GO:0051082~unfolded protein binding	5	0.461255	0.227438	HSLO_THET2, DNAJ_THET2, CH60_THET2, CLPX_THET2, Q72IK7_THET2, DNAK_THET2	667	8	2095	1.96308	1	0.99813	97.9675
Annotation Cluster 11	Enrichment Score: 0.87204608450341
Category	Term	Count	%	PValue	Genes	List Total	Pop Hits	Pop Total	Fold Enrichment	Bonferroni	Benjamini	FDR
SP_PIR_KEYWORDS	gtp-binding	13	1.19926	0.0244596	Q72IV6_THET2, EFTU_THET2, Q72IJ8_THET2, Q72JP4_THET2, OBG_THET2, IF2_THET2, EFG_THET2, Q72JS1_THET2, PURA_THET2, Q72GH4_THET2, MNME_THET2, Y1664_THET2	1084	27	4254	1.8895	0.990253	0.197894	26.4327
INTERPRO	IPR005225:Small GTP-binding protein	9	0.830258	0.030821	Q72IV6_THET2, EFTU_THET2, Q72IJ8_THET2, OBG_THET2, IF2_THET2, EFG_THET2, Q72GH4_THET2, MNME_THET2	965	15	3493	2.17181	1	1	40.8743
GOTERM_MF_FAT	GO:0019001~guanyl nucleotide binding	18	1.66052	0.062809	Q72IV6_THET2, EFTU_THET2, Q72IJ8_THET2, Q72GH4_THET2, Y1664_THET2, Q72JK5_THET2, Q72JP4_THET2, OBG_THET2, EFG_THET2, IF2_THET2, Q72JS1_THET2, PURA_THET2, Q72IH4_THET2, Q72LJ1_THET2, MNME_THET2, Q72JU4_THET2, Q72JF0_THET2	667	38	2095	1.48781	1	0.989742	62.4452
GOTERM_MF_FAT	GO:0032561~guanyl ribonucleotide binding	18	1.66052	0.062809	Q72IV6_THET2, EFTU_THET2, Q72IJ8_THET2, Q72GH4_THET2, Y1664_THET2, Q72JK5_THET2, Q72JP4_THET2, OBG_THET2, EFG_THET2, IF2_THET2, Q72JS1_THET2, PURA_THET2, Q72IH4_THET2, Q72LJ1_THET2, MNME_THET2, Q72JU4_THET2, Q72JF0_THET2	667	38	2095	1.48781	1	0.989742	62.4452
GOTERM_MF_FAT	GO:0005525~GTP binding	18	1.66052	0.062809	Q72IV6_THET2, EFTU_THET2, Q72IJ8_THET2, Q72GH4_THET2, Y1664_THET2, Q72JK5_THET2, Q72JP4_THET2, OBG_THET2, EFG_THET2, IF2_THET2, Q72JS1_THET2, PURA_THET2, Q72IH4_THET2, Q72LJ1_THET2, MNME_THET2, Q72JU4_THET2, Q72JF0_THET2	667	38	2095	1.48781	1	0.989742	62.4452
GOTERM_MF_FAT	GO:0008135~translation factor activity, nucleic acid binding	10	0.922509	0.0820656	EFTU_THET2, Q72L08_THET2, IF2_THET2, EFG_THET2, IF1_THET2, Q72GJ6_THET2, EFTS_THET2, RF1_THET2, EFP_THET2	667	18	2095	1.74496	1	0.993512	72.5504
SP_PIR_KEYWORDS	elongation factor	6	0.553506	0.166952	EFTU_THET2, Q72L08_THET2, EFG_THET2, EFTS_THET2, EFP_THET2	1084	12	4254	1.96218	1	0.623164	89.6096
GOTERM_MF_FAT	GO:0003924~GTPase activity	8	0.738007	0.276702	EFTU_THET2, Q72IJ8_THET2, Q72JP4_THET2, IF2_THET2, EFG_THET2, Q72IH4_THET2, MNME_THET2	667	17	2095	1.47808	1	0.999022	99.2484
GOTERM_MF_FAT	GO:0003746~translation elongation factor activity	6	0.553506	0.324581	EFTU_THET2, Q72L08_THET2, EFG_THET2, EFTS_THET2, EFP_THET2	667	12	2095	1.57046	1	0.99944	99.7327
GOTERM_BP_FAT	GO:0006414~translational elongation	5	0.461255	0.33608	EFTU_THET2, EFG_THET2, EFTS_THET2, EFP_THET2	582	9	1772	1.69149	1	0.999993	99.7763
INTERPRO	IPR004161:Translation elongation factor EFTu/EF1A, domain 2	5	0.461255	0.360167	EFTU_THET2, Q72IJ8_THET2, IF2_THET2, EFG_THET2	965	11	3493	1.64531	1	1	99.9445
UP_SEQ_FEATURE	nucleotide phosphate-binding region:GTP	8	0.738007	0.382788	EFTU_THET2, OBG_THET2, IF2_THET2, EFG_THET2, PURA_THET2, MNME_THET2, Y1664_THET2	237	15	593	1.33446	1	1	99.8846
INTERPRO	IPR000795:Protein synthesis factor, GTP-binding	5	0.461255	0.43256	EFTU_THET2, Q72IJ8_THET2, IF2_THET2, EFG_THET2	965	12	3493	1.5082	1	1	99.9926
Annotation Cluster 12	Enrichment Score: 0.8128335189881506
Category	Term	Count	%	PValue	Genes	List Total	Pop Hits	Pop Total	Fold Enrichment	Bonferroni	Benjamini	FDR
KEGG_PATHWAY	tth00061:Fatty acid biosynthesis	10	0.922509	0.00733017	ACCD_THET2, Q72LL2_THET2, Q72JL3_THET2, Q72KU7_THET2, Q72JL4_THET2, Q72LL1_THET2, Q72LL0_THET2, Q72H17_THET2, FABZ_THET2, Q72LL4_THET2	454	12	1244	2.28341	0.610043	0.0898736	8.18929
GOTERM_MF_FAT	GO:0004312~fatty-acid synthase activity	7	0.645756	0.147613	Q72LL2_THET2, Q72GI7_THET2, Q72LL1_THET2, Q72LL0_THET2, Q72H17_THET2, Q72L26_THET2, Q72LL4_THET2	667	12	2095	1.83221	1	0.99644	91.0306
GOTERM_BP_FAT	GO:0008610~lipid biosynthetic process	24	2.21402	0.369813	ACCD_THET2, ACP_THET2, Q72LL2_THET2, Q72JL3_THET2, ISPH_THET2, Q72JT6_THET2, Q72KZ1_THET2, ISPD_THET2, Q72G62_THET2, Q72J33_THET2, Q72L26_THET2, Q72LL4_THET2, ISPG_THET2, GPDA_THET2, PLSX_THET2, ISPE_THET2, DXR_THET2, DXS_THET2, Q72LL1_THET2, Q72LL0_THET2, Q72I41_THET2, Q72H17_THET2, Q72LG9_THET2, FABZ_THET2	582	65	1772	1.12419	1	0.999962	99.8972
GOTERM_BP_FAT	GO:0006633~fatty acid biosynthetic process	11	1.01476	0.439701	ACCD_THET2, ACP_THET2, Q72LL2_THET2, Q72JL3_THET2, PLSX_THET2, Q72LL1_THET2, Q72LL0_THET2, Q72H17_THET2, FABZ_THET2, Q72L26_THET2, Q72LL4_THET2	582	28	1772	1.19612	1	0.999781	99.9822
GOTERM_BP_FAT	GO:0006631~fatty acid metabolic process	12	1.10701	0.49029	ACCD_THET2, ACP_THET2, Q72LL2_THET2, Q72JL3_THET2, Q72J81_THET2, PLSX_THET2, Q72LL1_THET2, Q72LL0_THET2, Q72H17_THET2, FABZ_THET2, Q72L26_THET2, Q72LL4_THET2	582	32	1772	1.14175	1	0.99975	99.9956
Annotation Cluster 13	Enrichment Score: 0.8046649427082707
Category	Term	Count	%	PValue	Genes	List Total	Pop Hits	Pop Total	Fold Enrichment	Bonferroni	Benjamini	FDR
SP_PIR_KEYWORDS	amino-acid biosynthesis	35	3.22878	0.00748619	KHSE_THET2, LYSK_THET2, AROC_THET2, AROE_THET2, HOSC_THET2, ILVC_THET2, LEU3_THET2, FOLD_THET2, HISX_THET2, OTC_THET2, HIS1_THET2, HIS6_THET2, CARA_THET2, Q72JC9_THET2, PROB_THET2, LEUD_THET2, AROA_THET2, CARB_THET2, ARGJ_THET2, ARGR_THET2, AK_THET2, TRPA_THET2, AROK_THET2, HIS4_THET2, ILVD_THET2, P5CR_THET2, HIS2_THET2, MTNA_THET2, HIS5_THET2, Q72GB9_THET2, HACB_THET2, LEUC_THET2, Q72JC6_THET2, …	1084	91	4254	1.50937	0.754678	0.0954975	8.89407
GOTERM_BP_FAT	GO:0046394~carboxylic acid biosynthetic process	62	5.71956	0.222744	KHSE_THET2, LYSK_THET2, HOSC_THET2, Q72IM8_THET2, ILVC_THET2, Q72LL4_THET2, LEU3_THET2, HISX_THET2, PLSX_THET2, HIS1_THET2, SYS_THET2, HIS6_THET2, Q72LL1_THET2, FABZ_THET2, Q72HJ4_THET2, Q72IW1_THET2, ARGJ_THET2, ARGR_THET2, Q72K32_THET2, Q72LE2_THET2, TRPA_THET2, AROK_THET2, Q72KK0_THET2, ILVD_THET2, HIS2_THET2, HIS5_THET2, LEUC_THET2, Q72LL0_THET2, Q72H17_THET2, LIPB_THET2, ACCD_THET2, AROC_THE…	582	171	1772	1.10392	1	1	97.6588
GOTERM_BP_FAT	GO:0016053~organic acid biosynthetic process	62	5.71956	0.222744	KHSE_THET2, LYSK_THET2, HOSC_THET2, Q72IM8_THET2, ILVC_THET2, Q72LL4_THET2, LEU3_THET2, HISX_THET2, PLSX_THET2, HIS1_THET2, SYS_THET2, HIS6_THET2, Q72LL1_THET2, FABZ_THET2, Q72HJ4_THET2, Q72IW1_THET2, ARGJ_THET2, ARGR_THET2, Q72K32_THET2, Q72LE2_THET2, TRPA_THET2, AROK_THET2, Q72KK0_THET2, ILVD_THET2, HIS2_THET2, HIS5_THET2, LEUC_THET2, Q72LL0_THET2, Q72H17_THET2, LIPB_THET2, ACCD_THET2, AROC_THE…	582	171	1772	1.10392	1	1	97.6588
GOTERM_BP_FAT	GO:0008652~cellular amino acid biosynthetic process	49	4.5203	0.288028	KHSE_THET2, LYSK_THET2, HOSC_THET2, Q72IM8_THET2, ILVC_THET2, LEU3_THET2, HISX_THET2, HIS1_THET2, SYS_THET2, HIS6_THET2, Q72HJ4_THET2, Q72IW1_THET2, ARGJ_THET2, Q72K32_THET2, ARGR_THET2, TRPA_THET2, Q72LE2_THET2, AROK_THET2, Q72KK0_THET2, ILVD_THET2, HIS2_THET2, HIS5_THET2, LEUC_THET2, AROC_THET2, AROE_THET2, Q72JD1_THET2, FOLD_THET2, OTC_THET2, Q72JC7_THET2, CARA_THET2, Q72JC9_THET2, Q746J7_THET…	582	136	1772	1.09698	1	1	99.3665
GOTERM_BP_FAT	GO:0009309~amine biosynthetic process	52	4.79705	0.311865	KHSE_THET2, LYSK_THET2, HOSC_THET2, Q72IM8_THET2, ILVC_THET2, LEU3_THET2, HISX_THET2, HIS1_THET2, SYS_THET2, HIS6_THET2, Q72K54_THET2, Q72HJ4_THET2, Q72IW1_THET2, ARGJ_THET2, ARGR_THET2, Q72K32_THET2, TRPA_THET2, Q72LE2_THET2, AROK_THET2, Q72KK0_THET2, ILVD_THET2, HIS2_THET2, HIS5_THET2, LEUC_THET2, AROC_THET2, AROE_THET2, Q72JD1_THET2, FOLD_THET2, OTC_THET2, Q72JC7_THET2, CARA_THET2, Q72JC9_THET…	582	146	1772	1.0844	1	0.999998	99.6186
GOTERM_BP_FAT	GO:0044271~nitrogen compound biosynthetic process	115	10.6089	0.445385	Q72H76_THET2, Q746P0_THET2, Q72JZ7_THET2, Q72HE9_THET2, Q72IM8_THET2, ILVC_THET2, PURQ_THET2, LEU3_THET2, PURA_THET2, HIS1_THET2, SYS_THET2, HIS6_THET2, Q72KF9_THET2, Q72HJ4_THET2, VATB_THET2, Q72IW1_THET2, ARGR_THET2, Q72K32_THET2, Q72K86_THET2, TGT_THET2, TRPA_THET2, Q72LE2_THET2, Q72LA0_THET2, Q72I58_THET2, Q72KK0_THET2, Q72IH6_THET2, HIS2_THET2, VATD_THET2, HEMH_THET2, LEUC_THET2, Q72KM1_THET…	582	343	1772	1.02081	1	0.999471	99.9847
Annotation Cluster 14	Enrichment Score: 0.7682398724111822
Category	Term	Count	%	PValue	Genes	List Total	Pop Hits	Pop Total	Fold Enrichment	Bonferroni	Benjamini	FDR
KEGG_PATHWAY	tth00290:Valine, leucine and isoleucine biosynthesis	16	1.47601	0.00017294	LEUD_THET2, Q72GY8_THET2, Q72GH8_THET2, Q72JD1_THET2, SYI_THET2, SYV_THET2, ILVC_THET2, Q72K50_THET2, ILVD_THET2, LEU3_THET2, HACB_THET2, LEUC_THET2, Q72JC6_THET2, Q72JC7_THET2, Q72JC9_THET2, Q72GM3_THET2	454	19	1244	2.30744	0.021895	0.00315761	0.200657
SP_PIR_KEYWORDS	branched-chain amino acid biosynthesis	7	0.645756	0.201571	LEUD_THET2, LEUC_THET2, Q72JC6_THET2, Q72JC9_THET2, ILVD_THET2, ILVC_THET2, LEU3_THET2	1084	16	4254	1.7169	1	0.66019	93.8605
GOTERM_BP_FAT	GO:0009081~branched chain family amino acid metabolic process	12	1.10701	0.290949	LEUD_THET2, HACB_THET2, LEUC_THET2, Q72JC6_THET2, Q72GH8_THET2, Q72JC7_THET2, Q72JC9_THET2, Q72JD1_THET2, ILVD_THET2, Q72GU9_THET2, ILVC_THET2, LEU3_THET2	582	28	1772	1.30486	1	1	99.4041
GOTERM_BP_FAT	GO:0009082~branched chain family amino acid biosynthetic process	10	0.922509	0.327035	LEUD_THET2, HACB_THET2, LEUC_THET2, Q72JC6_THET2, Q72JC7_THET2, Q72JC9_THET2, Q72JD1_THET2, ILVD_THET2, ILVC_THET2, LEU3_THET2	582	23	1772	1.32377	1	0.999997	99.7264
SP_PIR_KEYWORDS	leucine biosynthesis	4	0.369004	0.332848	LEUD_THET2, LEUC_THET2, Q72JC9_THET2, LEU3_THET2	1084	8	4254	1.96218	1	0.786605	99.3376
GOTERM_BP_FAT	GO:0009098~leucine biosynthetic process	6	0.553506	0.507137	LEUD_THET2, HACB_THET2, LEUC_THET2, Q72JC9_THET2, Q72JD1_THET2, LEU3_THET2	582	14	1772	1.30486	1	0.999645	99.9974
GOTERM_BP_FAT	GO:0006551~leucine metabolic process	6	0.553506	0.507137	LEUD_THET2, HACB_THET2, LEUC_THET2, Q72JC9_THET2, Q72JD1_THET2, LEU3_THET2	582	14	1772	1.30486	1	0.999645	99.9974
INTERPRO	IPR015937:Aconitase-like core	4	0.369004	0.550932	LEUD_THET2, HACB_THET2, LEUC_THET2, Q72KN3_THET2	965	10	3493	1.44788	1	1	99.9999
GOTERM_MF_FAT	GO:0003861~3-isopropylmalate dehydratase activity	3	0.276753	0.778957	LEUD_THET2, HACB_THET2, LEUC_THET2	667	8	2095	1.17785	1	0.999996	100
Annotation Cluster 15	Enrichment Score: 0.7139832002222168
Category	Term	Count	%	PValue	Genes	List Total	Pop Hits	Pop Total	Fold Enrichment	Bonferroni	Benjamini	FDR
INTERPRO	IPR001412:Aminoacyl-tRNA synthetase, class I, conserved site	8	0.738007	0.0405983	Q72JB4_THET2, Q72L79_THET2, SYC_THET2, SYY_THET2, SYI_THET2, SYR_THET2, Q72GM3_THET2, SYV_THET2	965	13	3493	2.2275	1	1	50.1277
INTERPRO	IPR002300:Aminoacyl-tRNA synthetase, class Ia	3	0.276753	0.186379	SYI_THET2, Q72GM3_THET2, SYV_THET2	965	3	3493	3.61969	1	1	96.8642
INTERPRO	IPR013155:Valyl/Leucyl/Isoleucyl-tRNA synthetase, class I, anticodon-binding	3	0.276753	0.186379	SYI_THET2, Q72GM3_THET2, SYV_THET2	965	3	3493	3.61969	1	1	96.8642
KEGG_PATHWAY	ttj00290:Valine, leucine and isoleucine biosynthesis	4	0.369004	0.988025	Q72JC7_THET2, SYI_THET2, Q72GM3_THET2, SYV_THET2	454	19	1244	0.576861	1	0.999966	100
Annotation Cluster 16	Enrichment Score: 0.67974944422425
Category	Term	Count	%	PValue	Genes	List Total	Pop Hits	Pop Total	Fold Enrichment	Bonferroni	Benjamini	FDR
SP_PIR_KEYWORDS	potassium	4	0.369004	0.176614	Q72JG2_THET2, Q72G87_THET2, Q72G86_THET2, Q72LJ5_THET2, MNME_THET2, METK_THET2	1084	6	4254	2.61624	1	0.625496	91.0086
GOTERM_MF_FAT	GO:0030955~potassium ion binding	5	0.461255	0.227438	Q72JG2_THET2, Q72H84_THET2, Q72G87_THET2, Q72G86_THET2, Q72LJ5_THET2, MNME_THET2, METK_THET2	667	8	2095	1.96308	1	0.99813	97.9675
GOTERM_MF_FAT	GO:0031420~alkali metal ion binding	5	0.461255	0.227438	Q72JG2_THET2, Q72H84_THET2, Q72G87_THET2, Q72G86_THET2, Q72LJ5_THET2, MNME_THET2, METK_THET2	667	8	2095	1.96308	1	0.99813	97.9675
Annotation Cluster 17	Enrichment Score: 0.6366381219050704
Category	Term	Count	%	PValue	Genes	List Total	Pop Hits	Pop Total	Fold Enrichment	Bonferroni	Benjamini	FDR
GOTERM_BP_FAT	GO:0034660~ncRNA metabolic process	39	3.59779	0.00998049	Q72HF3_THET2, Q72L94_THET2, TRMFO_THET2, MIAA_THET2, Q72J48_THET2, SYD_THET2, RSMG_THET2, Q72IP5_THET2, QUEA_THET2, SYFB_THET2, TRUA_THET2, MNMG_THET2, SYP_THET2, SYK_THET2, SYS_THET2, RLMN_THET2, MNME_THET2, SYA_THET2, SYR_THET2, Q72K73_THET2, Q72GM3_THET2, SYN_THET2, SYFA_THET2, Q72G66_THET2, SYG_THET2, Q72JB4_THET2, TGT_THET2, SYH_THET2, TRUD_THET2, SYI_THET2, SYV_THET2, TRMI_THET2, Q72L79_THE…	582	84	1772	1.4136	0.998371	0.799091	13.8821
SP_PIR_KEYWORDS	trna processing	10	0.922509	0.23037	TRMI_THET2, TRUA_THET2, TRMFO_THET2, MIAA_THET2, TGT_THET2, MNMG_THET2, MNME_THET2, TRUD_THET2, TRUB_THET2, TRMB_THET2	1084	27	4254	1.45346	1	0.671377	96.1063
GOTERM_BP_FAT	GO:0009451~RNA modification	13	1.19926	0.344467	Q72L94_THET2, TGT_THET2, TRUD_THET2, Q72GT1_THET2, QUEA_THET2, TRMI_THET2, TRUA_THET2, MNMG_THET2, RSMA_THET2, Q72GK1_THET2, MNME_THET2, TRUB_THET2, TRMB_THET2	582	32	1772	1.2369	1	0.999987	99.8149
GOTERM_BP_FAT	GO:0006400~tRNA modification	9	0.830258	0.37799	TRMI_THET2, TRUA_THET2, TGT_THET2, MNMG_THET2, MNME_THET2, TRUD_THET2, TRUB_THET2, TRMB_THET2, QUEA_THET2	582	21	1772	1.30486	1	0.999945	99.9153
GOTERM_BP_FAT	GO:0008033~tRNA processing	14	1.29151	0.39437	Q72HF3_THET2, Q72G66_THET2, TRMFO_THET2, TGT_THET2, MIAA_THET2, TRUD_THET2, QUEA_THET2, TRMI_THET2, TRUA_THET2, SYFB_THET2, MNMG_THET2, MNME_THET2, TRUB_THET2, TRMB_THET2	582	36	1772	1.18404	1	0.99994	99.9431
GOTERM_BP_FAT	GO:0034470~ncRNA processing	19	1.75277	0.44005	Q72HF3_THET2, Q72G66_THET2, Q72L94_THET2, TRMFO_THET2, MIAA_THET2, TGT_THET2, RSMG_THET2, TRUD_THET2, QUEA_THET2, TRMI_THET2, TRUA_THET2, SYFB_THET2, MNMG_THET2, RLMN_THET2, RSMA_THET2, MNME_THET2, TRUB_THET2, Q72K73_THET2, TRMB_THET2	582	52	1772	1.11248	1	0.999738	99.9823
GOTERM_BP_FAT	GO:0006396~RNA processing	23	2.12177	0.672855	Q72HF3_THET2, Q72H04_THET2, Q72G66_THET2, RL1_THET2, Q72L94_THET2, TRMFO_THET2, MIAA_THET2, TGT_THET2, RSMG_THET2, TRUD_THET2, QUEA_THET2, TRMI_THET2, TRUA_THET2, SYFB_THET2, MNMG_THET2, RLMN_THET2, RSMA_THET2, MNME_THET2, Q72JF4_THET2, TRUB_THET2, Q72K73_THET2, PNP_THET2, TRMB_THET2	582	71	1772	0.986303	1	0.999755	100
Annotation Cluster 18	Enrichment Score: 0.601115359816522
Category	Term	Count	%	PValue	Genes	List Total	Pop Hits	Pop Total	Fold Enrichment	Bonferroni	Benjamini	FDR
SP_PIR_KEYWORDS	dna-directed rna polymerase	5	0.461255	0.120053	RPOC_THET2, RPOZ_THET2, RPOA_THET2, Q72J83_THET2, RPOB_THET2	1084	8	4254	2.45272	1	0.537675	79.5126
KEGG_PATHWAY	tth03020:RNA polymerase	4	0.369004	0.140029	RPOC_THET2, RPOZ_THET2, RPOA_THET2, RPOB_THET2	454	4	1244	2.74009	1	0.524161	82.6563
GOTERM_MF_FAT	GO:0034062~RNA polymerase activity	5	0.461255	0.227438	RPOC_THET2, RPOZ_THET2, RPOA_THET2, Q72J83_THET2, RPOB_THET2	667	8	2095	1.96308	1	0.99813	97.9675
GOTERM_MF_FAT	GO:0003899~DNA-directed RNA polymerase activity	5	0.461255	0.227438	RPOC_THET2, RPOZ_THET2, RPOA_THET2, Q72J83_THET2, RPOB_THET2	667	8	2095	1.96308	1	0.99813	97.9675
GOTERM_BP_FAT	GO:0032774~RNA biosynthetic process	8	0.738007	0.499967	RPOC_THET2, NUSB_THET2, Q72KG4_THET2, RPOZ_THET2, RPOA_THET2, Q72J83_THET2, RPOB_THET2, Q72GW1_THET2	582	20	1772	1.21787	1	0.999686	99.9967
GOTERM_BP_FAT	GO:0006351~transcription, DNA-dependent	7	0.645756	0.568918	RPOC_THET2, NUSB_THET2, Q72KG4_THET2, RPOZ_THET2, RPOA_THET2, RPOB_THET2, Q72GW1_THET2	582	18	1772	1.18404	1	0.999714	99.9996
Annotation Cluster 19	Enrichment Score: 0.5969367165047251
Category	Term	Count	%	PValue	Genes	List Total	Pop Hits	Pop Total	Fold Enrichment	Bonferroni	Benjamini	FDR
INTERPRO	IPR002085:Alcohol dehydrogenase superfamily, zinc-containing	7	0.645756	0.210838	Q72HC3_THET2, Q72KT1_THET2, Q72KK6_THET2, Q72IG9_THET2, Q72GL5_THET2, TDH_THET2, Q72LG2_THET2	965	15	3493	1.68919	1	1	98.1214
INTERPRO	IPR013149:Alcohol dehydrogenase, zinc-binding	7	0.645756	0.210838	Q72HC3_THET2, Q72KT1_THET2, Q72KK6_THET2, Q72IG9_THET2, Q72GL5_THET2, TDH_THET2, Q72LG2_THET2	965	15	3493	1.68919	1	1	98.1214
INTERPRO	IPR013154:Alcohol dehydrogenase GroES-like	7	0.645756	0.210838	Q72HC3_THET2, Q72KT1_THET2, Q72KK6_THET2, Q72IG9_THET2, Q72GL5_THET2, TDH_THET2, Q72LG2_THET2	965	15	3493	1.68919	1	1	98.1214
PIR_SUPERFAMILY	PIRSF000091:alcohol dehydrogenase	7	0.645756	0.321482	Q72HC3_THET2, Q72KT1_THET2, Q72KK6_THET2, Q72IG9_THET2, Q72GL5_THET2, TDH_THET2, Q72LG2_THET2	677	15	2150	1.48203	1	1	99.7139
COG_ONTOLOGY	Energy production and conversion / General function prediction only	4	0.369004	0.343807	Q72HC3_THET2, Q72KK6_THET2, Q72IG9_THET2, Q72LG2_THET2	187	8	718	1.91979	0.999999	0.969061	97.4709
Annotation Cluster 20	Enrichment Score: 0.5506430818732667
Category	Term	Count	%	PValue	Genes	List Total	Pop Hits	Pop Total	Fold Enrichment	Bonferroni	Benjamini	FDR
KEGG_PATHWAY	tth00650:Butanoate metabolism	13	1.19926	0.157104	Q72J81_THET2, Q72GT0_THET2, Q72KX0_THET2, Q72L25_THET2, Q72K50_THET2, Q72IP3_THET2, Q72HC0_THET2, Q72JC6_THET2, Q72JC7_THET2, Q72GZ8_THET2, Q72KW9_THET2, Q72KD6_THET2, Q72L72_THET2	454	25	1244	1.42485	1	0.529693	86.2599
KEGG_PATHWAY	tth00310:Lysine degradation	7	0.645756	0.172677	Q72GZ6_THET2, Q72GT0_THET2, Q72KX0_THET2, Q72KW9_THET2, Q72GZ8_THET2, Q72L72_THET2, Q72GZ7_THET2	454	11	1244	1.74369	1	0.554602	88.9354
KEGG_PATHWAY	tth00380:Tryptophan metabolism	7	0.645756	0.172677	Q72JB4_THET2, Q72GT0_THET2, Q72KX0_THET2, Q72KW9_THET2, Q72GZ8_THET2, Q72L72_THET2, Q72GZ7_THET2	454	11	1244	1.74369	1	0.554602	88.9354
KEGG_PATHWAY	tth00071:Fatty acid metabolism	10	0.922509	0.221364	Q72HC3_THET2, Q72HC0_THET2, Q72GT0_THET2, Q72KX0_THET2, Q72KW9_THET2, Q72GZ8_THET2, Q72L72_THET2, Q72L25_THET2, Q72LG2_THET2, Q72JZ5_THET2	454	19	1244	1.44215	1	0.621113	94.5295
KEGG_PATHWAY	tth00632:Benzoate degradation via CoA ligation	8	0.738007	0.429122	Q72IP3_THET2, Q72J81_THET2, Q72GT0_THET2, Q72KX0_THET2, Q72GZ8_THET2, Q72L72_THET2, Q72KX9_THET2, Q72G93_THET2	454	17	1244	1.28945	1	0.826244	99.8512
KEGG_PATHWAY	tth00281:Geraniol degradation	5	0.461255	0.524674	Q72GT0_THET2, Q72KW9_THET2, Q72GZ8_THET2, Q72HE1_THET2, Q72JZ5_THET2	454	10	1244	1.37004	1	0.873761	99.9823
KEGG_PATHWAY	tth00930:Caprolactam degradation	3	0.276753	0.598778	Q72GT0_THET2, Q72KW9_THET2, Q72GZ8_THET2	454	5	1244	1.64405	1	0.916851	99.9975
Annotation Cluster 21	Enrichment Score: 0.5325554638330512
Category	Term	Count	%	PValue	Genes	List Total	Pop Hits	Pop Total	Fold Enrichment	Bonferroni	Benjamini	FDR
INTERPRO	IPR001412:Aminoacyl-tRNA synthetase, class I, conserved site	8	0.738007	0.0405983	Q72JB4_THET2, Q72L79_THET2, SYC_THET2, SYY_THET2, SYI_THET2, SYR_THET2, Q72GM3_THET2, SYV_THET2	965	13	3493	2.2275	1	1	50.1277
UP_SEQ_FEATURE	short sequence motif:"HIGH" region	5	0.461255	0.400794	SYC_THET2, SYY_THET2, SYI_THET2, SYR_THET2, SYV_THET2	237	8	593	1.56382	1	1	99.9238
UP_SEQ_FEATURE	short sequence motif:"KMSKS" region	4	0.369004	0.576402	SYC_THET2, SYY_THET2, SYI_THET2, SYV_THET2	237	7	593	1.42978	1	1	99.9994
UP_SEQ_FEATURE	binding site:ATP	7	0.645756	0.789993	COAX_THET2, SYC_THET2, PGK_THET2, SYY_THET2, AROK_THET2, SYI_THET2, SYV_THET2	237	18	593	0.973043	1	1	100
Annotation Cluster 22	Enrichment Score: 0.5263376395737469
Category	Term	Count	%	PValue	Genes	List Total	Pop Hits	Pop Total	Fold Enrichment	Bonferroni	Benjamini	FDR
KEGG_PATHWAY	tth00900:Terpenoid backbone biosynthesis	9	0.830258	0.031938	ISPG_THET2, ISPE_THET2, ISPH_THET2, Q72KX0_THET2, DXR_THET2, DXS_THET2, ISPD_THET2, Q72L72_THET2, Q72I41_THET2	454	12	1244	2.05507	0.984311	0.196415	31.4055
SP_PIR_KEYWORDS	Isoprene biosynthesis	8	0.738007	0.115425	ISPG_THET2, ISPE_THET2, ISPH_THET2, DXR_THET2, DXS_THET2, ISPD_THET2, Q72G62_THET2, Q72I41_THET2	1084	17	4254	1.84675	1	0.54655	78.1362
GOTERM_BP_FAT	GO:0019748~secondary metabolic process	14	1.29151	0.26087	TPIS_THET2, NADD_THET2, Q72JZ7_THET2, ISPH_THET2, Q72HE9_THET2, ISPD_THET2, Q72JZ9_THET2, TAL_THET2, ISPG_THET2, RPIA_THET2, ISPE_THET2, DXR_THET2, DXS_THET2, Q72GU9_THET2	582	33	1772	1.29168	1	1	98.8934
GOTERM_BP_FAT	GO:0016114~terpenoid biosynthetic process	6	0.553506	0.644498	ISPG_THET2, ISPE_THET2, ISPH_THET2, DXR_THET2, DXS_THET2, ISPD_THET2	582	16	1772	1.14175	1	0.99977	100
GOTERM_BP_FAT	GO:0006721~terpenoid metabolic process	6	0.553506	0.644498	ISPG_THET2, ISPE_THET2, ISPH_THET2, DXR_THET2, DXS_THET2, ISPD_THET2	582	16	1772	1.14175	1	0.99977	100
GOTERM_BP_FAT	GO:0008299~isoprenoid biosynthetic process	8	0.738007	0.719582	ISPG_THET2, ISPE_THET2, ISPH_THET2, DXR_THET2, DXS_THET2, ISPD_THET2, Q72G62_THET2, Q72I41_THET2	582	24	1772	1.01489	1	0.999792	100
GOTERM_BP_FAT	GO:0006720~isoprenoid metabolic process	8	0.738007	0.719582	ISPG_THET2, ISPE_THET2, ISPH_THET2, DXR_THET2, DXS_THET2, ISPD_THET2, Q72G62_THET2, Q72I41_THET2	582	24	1772	1.01489	1	0.999792	100
Annotation Cluster 23	Enrichment Score: 0.5210301586467313
Category	Term	Count	%	PValue	Genes	List Total	Pop Hits	Pop Total	Fold Enrichment	Bonferroni	Benjamini	FDR
KEGG_PATHWAY	tth00630:Glyoxylate and dicarboxylate metabolism	9	0.830258	0.189418	MDH_THET2, Q72KK5_THET2, FOLD_THET2, Q72LD2_THET2, Q72LD0_THET2, Q72LD5_THET2, Q72KN3_THET2, Q72LD1_THET2, Q72J03_THET2	454	16	1244	1.5413	1	0.579836	91.2738
GOTERM_MF_FAT	GO:0003973~(S)-2-hydroxy-acid oxidase activity	3	0.276753	0.379965	Q72LD2_THET2, Q72LD0_THET2, Q72LD1_THET2	667	4	2095	2.3557	1	0.999783	99.9266
GOTERM_MF_FAT	GO:0016899~oxidoreductase activity, acting on the CH-OH group of donors, oxygen as acceptor	3	0.276753	0.379965	Q72LD2_THET2, Q72LD0_THET2, Q72LD1_THET2	667	4	2095	2.3557	1	0.999783	99.9266
Annotation Cluster 24	Enrichment Score: 0.49412579106707316
Category	Term	Count	%	PValue	Genes	List Total	Pop Hits	Pop Total	Fold Enrichment	Bonferroni	Benjamini	FDR
GOTERM_MF_FAT	GO:0031406~carboxylic acid binding	16	1.47601	0.195907	GCSH_THET2, ACP_THET2, Q72KV4_THET2, Q72JL3_THET2, Q72K32_THET2, AK_THET2, Q72LF6_THET2, Q72JL4_THET2, Q72LQ4_THET2, Q72GZ6_THET2, OTC_THET2, Q72GP6_THET2, Q72JC7_THET2, Q72HX7_THET2, Q72JF3_THET2, Q72GU4_THET2	667	38	2095	1.3225	1	0.997882	96.2818
INTERPRO	IPR002912:Amino acid-binding ACT	6	0.553506	0.337949	Q72KV4_THET2, Q72K32_THET2, AK_THET2, Q72JC7_THET2, Q72LF6_THET2, Q72HX7_THET2	965	14	3493	1.5513	1	1	99.9015
GOTERM_MF_FAT	GO:0043176~amine binding	8	0.738007	0.399299	ACP_THET2, Q72KV4_THET2, OTC_THET2, Q72K32_THET2, AK_THET2, Q72JC7_THET2, Q72LF6_THET2, Q72HX7_THET2	667	19	2095	1.3225	1	0.999768	99.9545
GOTERM_MF_FAT	GO:0016597~amino acid binding	8	0.738007	0.399299	ACP_THET2, Q72KV4_THET2, OTC_THET2, Q72K32_THET2, AK_THET2, Q72JC7_THET2, Q72LF6_THET2, Q72HX7_THET2	667	19	2095	1.3225	1	0.999768	99.9545
Annotation Cluster 25	Enrichment Score: 0.48813904344909226
Category	Term	Count	%	PValue	Genes	List Total	Pop Hits	Pop Total	Fold Enrichment	Bonferroni	Benjamini	FDR
GOTERM_BP_FAT	GO:0044275~cellular carbohydrate catabolic process	13	1.19926	0.211253	LDH_THET2, MDH_THET2, TPIS_THET2, Q72H84_THET2, PGK_THET2, APGM_THET2, ENO_THET2, TAL_THET2, RPIA_THET2, GPDA_THET2, Q72HS2_THET2, Q72GU9_THET2, Q72GZ7_THET2	582	29	1772	1.36485	1	1	97.0866
GOTERM_BP_FAT	GO:0046164~alcohol catabolic process	13	1.19926	0.211253	LDH_THET2, MDH_THET2, TPIS_THET2, Q72H84_THET2, PGK_THET2, APGM_THET2, ENO_THET2, TAL_THET2, RPIA_THET2, GPDA_THET2, Q72HS2_THET2, Q72GU9_THET2, Q72GZ7_THET2	582	29	1772	1.36485	1	1	97.0866
SP_PIR_KEYWORDS	glycolysis	6	0.553506	0.217426	ENO_THET2, LDH_THET2, TPIS_THET2, Q72H84_THET2, PGK_THET2, APGM_THET2	1084	13	4254	1.81124	1	0.673132	95.212
GOTERM_BP_FAT	GO:0046365~monosaccharide catabolic process	12	1.10701	0.244439	MDH_THET2, ENO_THET2, LDH_THET2, TAL_THET2, TPIS_THET2, RPIA_THET2, Q72H84_THET2, PGK_THET2, Q72HS2_THET2, APGM_THET2, Q72GZ7_THET2, Q72GU9_THET2	582	27	1772	1.35319	1	1	98.4645
GOTERM_BP_FAT	GO:0019320~hexose catabolic process	12	1.10701	0.244439	MDH_THET2, ENO_THET2, LDH_THET2, TAL_THET2, TPIS_THET2, RPIA_THET2, Q72H84_THET2, PGK_THET2, Q72HS2_THET2, APGM_THET2, Q72GZ7_THET2, Q72GU9_THET2	582	27	1772	1.35319	1	1	98.4645
GOTERM_BP_FAT	GO:0006007~glucose catabolic process	12	1.10701	0.244439	MDH_THET2, ENO_THET2, LDH_THET2, TAL_THET2, TPIS_THET2, RPIA_THET2, Q72H84_THET2, PGK_THET2, Q72HS2_THET2, APGM_THET2, Q72GZ7_THET2, Q72GU9_THET2	582	27	1772	1.35319	1	1	98.4645
GOTERM_BP_FAT	GO:0006096~glycolysis	9	0.830258	0.318555	MDH_THET2, ENO_THET2, LDH_THET2, TPIS_THET2, Q72H84_THET2, PGK_THET2, Q72HS2_THET2, APGM_THET2, Q72GZ7_THET2	582	20	1772	1.3701	1	0.999998	99.6703
GOTERM_BP_FAT	GO:0016052~carbohydrate catabolic process	16	1.47601	0.355177	LDH_THET2, MDH_THET2, TPIS_THET2, Q72H84_THET2, PGK_THET2, APGM_THET2, DEOC_THET2, ENO_THET2, TAL_THET2, RPIA_THET2, GPDA_THET2, Q72KA2_THET2, Q72HS2_THET2, Q72GU9_THET2, Q72GZ7_THET2, Q72H29_THET2	582	41	1772	1.18817	1	0.99997	99.8552
GOTERM_BP_FAT	GO:0006006~glucose metabolic process	14	1.29151	0.617884	LDH_THET2, MDH_THET2, TPIS_THET2, Q72KV4_THET2, Q72H84_THET2, PGK_THET2, APGM_THET2, ENO_THET2, TAL_THET2, RPIA_THET2, Q72HS2_THET2, Q72K98_THET2, Q72GU9_THET2, Q72GZ7_THET2	582	41	1772	1.03964	1	0.999756	99.9999
GOTERM_BP_FAT	GO:0019318~hexose metabolic process	15	1.38376	0.650967	LDH_THET2, MDH_THET2, TPIS_THET2, Q72KV4_THET2, Q72H84_THET2, PGK_THET2, Q746I4_THET2, APGM_THET2, ENO_THET2, TAL_THET2, RPIA_THET2, Q72HS2_THET2, Q72K98_THET2, Q72GU9_THET2, Q72GZ7_THET2	582	45	1772	1.01489	1	0.99973	100
GOTERM_BP_FAT	GO:0005996~monosaccharide metabolic process	19	1.75277	0.662136	LDH_THET2, MDH_THET2, TPIS_THET2, Q72KV4_THET2, Q72H84_THET2, ISPH_THET2, PGK_THET2, Q746I4_THET2, APGM_THET2, Q72J33_THET2, ENO_THET2, TAL_THET2, RPIA_THET2, Q746L7_THET2, Q72HS2_THET2, Q72K98_THET2, MURG_THET2, Q72GU9_THET2, Q72GZ7_THET2	582	58	1772	0.997393	1	0.999768	100
Annotation Cluster 26	Enrichment Score: 0.46971559359632487
Category	Term	Count	%	PValue	Genes	List Total	Pop Hits	Pop Total	Fold Enrichment	Bonferroni	Benjamini	FDR
KEGG_PATHWAY	tth03430:Mismatch repair	9	0.830258	0.0155328	Q72GP2_THET2, Q72JG9_THET2, Q72I50_THET2, Q72IS0_THET2, MUTL_THET2, Q72GV7_THET2, Q72H86_THET2, Q72HH8_THET2, Q72HA7_THET2	454	11	1244	2.24189	0.865178	0.133357	16.6234
KEGG_PATHWAY	tth03440:Homologous recombination	11	1.01476	0.029571	Q72G97_THET2, Q72GP2_THET2, Q72JG9_THET2, RECA_THET2, Q72J77_THET2, Q72GV7_THET2, RUVA_THET2, Q72H86_THET2, Q72HH8_THET2, RUVC_THET2, Q72GX7_THET2, Q72HA7_THET2	454	16	1244	1.88381	0.978553	0.192211	29.4323
KEGG_PATHWAY	tth03030:DNA replication	6	0.553506	0.458001	Q72GP2_THET2, Q72J83_THET2, Q72GV7_THET2, Q72H86_THET2, Q72HH8_THET2, Q72HA7_THET2	454	12	1244	1.37004	1	0.838497	99.9186
SP_PIR_KEYWORDS	dna replication	7	0.645756	0.642142	Q72GP2_THET2, Q72J83_THET2, DNAJ_THET2, Q72GV7_THET2, Q72IK7_THET2, Q72H86_THET2, Q72L57_THET2, Q72GX7_THET2	1084	25	4254	1.09882	1	0.943195	99.9997
GOTERM_MF_FAT	GO:0004527~exonuclease activity	7	0.645756	0.70256	Q72GP2_THET2, Q72JG9_THET2, Q72J56_THET2, Q72K93_THET2, Q72H86_THET2, Q72L57_THET2, PNP_THET2	667	21	2095	1.04698	1	0.999991	100
SP_PIR_KEYWORDS	dna-directed dna polymerase	3	0.276753	0.710826	Q72GP2_THET2, Q72H86_THET2, Q72L57_THET2	1084	9	4254	1.30812	1	0.952776	100
GOTERM_MF_FAT	GO:0034061~DNA polymerase activity	4	0.369004	0.957105	Q72GP2_THET2, Q72H86_THET2, Q72L57_THET2, Q72HA7_THET2	667	18	2095	0.697984	1	1	100
GOTERM_MF_FAT	GO:0003887~DNA-directed DNA polymerase activity	4	0.369004	0.957105	Q72GP2_THET2, Q72H86_THET2, Q72L57_THET2, Q72HA7_THET2	667	18	2095	0.697984	1	1	100
GOTERM_BP_FAT	GO:0006260~DNA replication	11	1.01476	0.958475	Q72GP2_THET2, Q72GB7_THET2, Q72I50_THET2, Q72J83_THET2, DNAJ_THET2, Q72GV7_THET2, Q72GR3_THET2, Q72IK7_THET2, Q72H86_THET2, Q72L57_THET2, Q72GX7_THET2, Q72HA7_THET2	582	45	1772	0.744254	1	0.999999	100
Annotation Cluster 27	Enrichment Score: 0.46820422014136015
Category	Term	Count	%	PValue	Genes	List Total	Pop Hits	Pop Total	Fold Enrichment	Bonferroni	Benjamini	FDR
KEGG_PATHWAY	tth03070:Bacterial secretion system	11	1.01476	0.0080105	SECA_THET2, Q72I24_THET2, Q72GK3_THET2, Q72KF0_THET2, Q72LJ1_THET2, Q72LI4_THET2, Q72GK4_THET2, Q72JU4_THET2, Q72LP0_THET2, Q72GW2_THET2, Q72LN9_THET2	454	14	1244	2.15293	0.642805	0.0822125	8.91738
KEGG_PATHWAY	tth03060:Protein export	10	0.922509	0.0162185	SECA_THET2, Q72I24_THET2, Q72KF0_THET2, Q72LJ1_THET2, Q72LI4_THET2, Q72IX8_THET2, Q72JU4_THET2, Q72LP0_THET2, Q72GW2_THET2, Q72LN9_THET2	454	13	1244	2.10776	0.876682	0.130235	17.2954
GOTERM_BP_FAT	GO:0070727~cellular macromolecule localization	7	0.645756	0.363798	SECA_THET2, Q72KF0_THET2, Q72LJ1_THET2, Q72LI4_THET2, Q72JU4_THET2, Q72LP0_THET2, Q72GW2_THET2	582	15	1772	1.42085	1	0.999968	99.8815
GOTERM_BP_FAT	GO:0034613~cellular protein localization	7	0.645756	0.363798	SECA_THET2, Q72KF0_THET2, Q72LJ1_THET2, Q72LI4_THET2, Q72JU4_THET2, Q72LP0_THET2, Q72GW2_THET2	582	15	1772	1.42085	1	0.999968	99.8815
SP_PIR_KEYWORDS	translocation	3	0.276753	0.376861	SECA_THET2, Q72KF0_THET2, Q72GW2_THET2	1084	5	4254	2.35461	1	0.805618	99.7158
SP_PIR_KEYWORDS	protein transport	4	0.369004	0.412182	SECA_THET2, Q72KP1_THET2, Q72KF0_THET2, Q72GW2_THET2	1084	9	4254	1.74416	1	0.830396	99.8621
GOTERM_BP_FAT	GO:0006605~protein targeting	4	0.369004	0.416764	SECA_THET2, Q72LJ1_THET2, Q72JU4_THET2, Q72GW2_THET2	582	7	1772	1.73981	1	0.999911	99.9676
GOTERM_BP_FAT	GO:0006886~intracellular protein transport	6	0.553506	0.430998	SECA_THET2, Q72KF0_THET2, Q72LJ1_THET2, Q72JU4_THET2, Q72LP0_THET2, Q72GW2_THET2	582	13	1772	1.40523	1	0.999904	99.9775
GOTERM_BP_FAT	GO:0046907~intracellular transport	6	0.553506	0.430998	SECA_THET2, Q72KF0_THET2, Q72LJ1_THET2, Q72JU4_THET2, Q72LP0_THET2, Q72GW2_THET2	582	13	1772	1.40523	1	0.999904	99.9775
GOTERM_BP_FAT	GO:0008104~protein localization	13	1.19926	0.440446	Q72KP1_THET2, Q72I24_THET2, SECA_THET2, Q72GK3_THET2, Q72LJ1_THET2, Q72KF0_THET2, Q72LI4_THET2, Q72IW4_THET2, CLPX_THET2, Q72JU4_THET2, Q72LP0_THET2, Q72GW2_THET2, TIG_THET2	582	34	1772	1.16414	1	0.999632	99.9825
GOTERM_BP_FAT	GO:0045184~establishment of protein localization	12	1.10701	0.49029	SECA_THET2, Q72KP1_THET2, Q72I24_THET2, Q72GK3_THET2, Q72KF0_THET2, Q72LJ1_THET2, Q72IW4_THET2, CLPX_THET2, Q72JU4_THET2, Q72LP0_THET2, Q72GW2_THET2, TIG_THET2	582	32	1772	1.14175	1	0.99975	99.9956
GOTERM_BP_FAT	GO:0015031~protein transport	12	1.10701	0.49029	SECA_THET2, Q72KP1_THET2, Q72I24_THET2, Q72GK3_THET2, Q72KF0_THET2, Q72LJ1_THET2, Q72IW4_THET2, CLPX_THET2, Q72JU4_THET2, Q72LP0_THET2, Q72GW2_THET2, TIG_THET2	582	32	1772	1.14175	1	0.99975	99.9956
GOTERM_BP_FAT	GO:0065002~intracellular protein transmembrane transport	3	0.276753	0.796441	SECA_THET2, Q72KF0_THET2, Q72LP0_THET2	582	8	1772	1.14175	1	0.999905	100
GOTERM_BP_FAT	GO:0032940~secretion by cell	4	0.369004	0.887742	Q72GK3_THET2, Q72KF0_THET2, Q72IW4_THET2, Q72GW2_THET2	582	14	1772	0.869907	1	0.999985	100
GOTERM_BP_FAT	GO:0009306~protein secretion	4	0.369004	0.887742	Q72GK3_THET2, Q72KF0_THET2, Q72IW4_THET2, Q72GW2_THET2	582	14	1772	0.869907	1	0.999985	100
GOTERM_BP_FAT	GO:0046903~secretion	4	0.369004	0.887742	Q72GK3_THET2, Q72KF0_THET2, Q72IW4_THET2, Q72GW2_THET2	582	14	1772	0.869907	1	0.999985	100
GOTERM_MF_FAT	GO:0008565~protein transporter activity	5	0.461255	0.899941	Q72I24_THET2, Q72GK3_THET2, Q72KF0_THET2, Q72LP0_THET2, Q72GW2_THET2	667	19	2095	0.82656	1	1	100
Annotation Cluster 28	Enrichment Score: 0.4671694528216446
Category	Term	Count	%	PValue	Genes	List Total	Pop Hits	Pop Total	Fold Enrichment	Bonferroni	Benjamini	FDR
INTERPRO	IPR005475:Transketolase, central region	5	0.461255	0.217233	ODBB_THET2, Q72GF2_THET2, DXS_THET2, Q72GZ7_THET2, Q72K50_THET2	965	9	3493	2.01094	1	1	98.3613
INTERPRO	IPR005476:Transketolase, C-terminal	4	0.369004	0.387008	ODBB_THET2, Q72GF2_THET2, DXS_THET2, Q72K50_THET2	965	8	3493	1.80984	1	1	99.9729
INTERPRO	IPR015941:Transketolase C-terminal-like	4	0.369004	0.471896	ODBB_THET2, Q72GF2_THET2, DXS_THET2, Q72K50_THET2	965	9	3493	1.60875	1	1	99.9978
Annotation Cluster 29	Enrichment Score: 0.4371714234563079
Category	Term	Count	%	PValue	Genes	List Total	Pop Hits	Pop Total	Fold Enrichment	Bonferroni	Benjamini	FDR
KEGG_PATHWAY	tth00760:Nicotinate and nicotinamide metabolism	10	0.922509	0.0162185	Q72J17_THET2, Q72JZ7_THET2, Q72IR2_THET2, NADD_THET2, Q72GS0_THET2, Q72HE9_THET2, Q72GR9_THET2, SURE1_THET2, Q72GR8_THET2, Q72JZ9_THET2	454	13	1244	2.10776	0.876682	0.130235	17.2954
GOTERM_BP_FAT	GO:0006769~nicotinamide metabolic process	8	0.738007	0.307869	TAL_THET2, TPIS_THET2, RPIA_THET2, Q72JZ7_THET2, NADD_THET2, Q72HE9_THET2, Q72GU9_THET2, Q72JZ9_THET2	582	17	1772	1.43279	1	0.999999	99.5842
GOTERM_BP_FAT	GO:0046496~nicotinamide nucleotide metabolic process	8	0.738007	0.307869	TAL_THET2, TPIS_THET2, RPIA_THET2, Q72JZ7_THET2, NADD_THET2, Q72HE9_THET2, Q72GU9_THET2, Q72JZ9_THET2	582	17	1772	1.43279	1	0.999999	99.5842
GOTERM_BP_FAT	GO:0009820~alkaloid metabolic process	8	0.738007	0.307869	TAL_THET2, TPIS_THET2, RPIA_THET2, Q72JZ7_THET2, NADD_THET2, Q72HE9_THET2, Q72GU9_THET2, Q72JZ9_THET2	582	17	1772	1.43279	1	0.999999	99.5842
GOTERM_BP_FAT	GO:0019362~pyridine nucleotide metabolic process	8	0.738007	0.436473	TAL_THET2, TPIS_THET2, RPIA_THET2, Q72JZ7_THET2, NADD_THET2, Q72HE9_THET2, Q72GU9_THET2, Q72JZ9_THET2	582	19	1772	1.28197	1	0.99984	99.9806
GOTERM_BP_FAT	GO:0006733~oxidoreduction coenzyme metabolic process	8	0.738007	0.436473	TAL_THET2, TPIS_THET2, RPIA_THET2, Q72JZ7_THET2, NADD_THET2, Q72HE9_THET2, Q72GU9_THET2, Q72JZ9_THET2	582	19	1772	1.28197	1	0.99984	99.9806
GOTERM_BP_FAT	GO:0043603~cellular amide metabolic process	8	0.738007	0.499967	TAL_THET2, TPIS_THET2, RPIA_THET2, Q72JZ7_THET2, NADD_THET2, Q72HE9_THET2, Q72GU9_THET2, Q72JZ9_THET2	582	20	1772	1.21787	1	0.999686	99.9967
GOTERM_BP_FAT	GO:0006098~pentose-phosphate shunt	4	0.369004	0.518523	TAL_THET2, TPIS_THET2, RPIA_THET2, Q72GU9_THET2	582	8	1772	1.52234	1	0.99964	99.9981
GOTERM_BP_FAT	GO:0006739~NADP metabolic process	4	0.369004	0.518523	TAL_THET2, TPIS_THET2, RPIA_THET2, Q72GU9_THET2	582	8	1772	1.52234	1	0.99964	99.9981
GOTERM_BP_FAT	GO:0019674~NAD metabolic process	4	0.369004	0.609744	Q72JZ7_THET2, NADD_THET2, Q72HE9_THET2, Q72JZ9_THET2	582	9	1772	1.35319	1	0.999739	99.9999
GOTERM_BP_FAT	GO:0019359~nicotinamide nucleotide biosynthetic process	4	0.369004	0.609744	Q72JZ7_THET2, NADD_THET2, Q72HE9_THET2, Q72JZ9_THET2	582	9	1772	1.35319	1	0.999739	99.9999
GOTERM_BP_FAT	GO:0009435~NAD biosynthetic process	4	0.369004	0.609744	Q72JZ7_THET2, NADD_THET2, Q72HE9_THET2, Q72JZ9_THET2	582	9	1772	1.35319	1	0.999739	99.9999
GOTERM_BP_FAT	GO:0019363~pyridine nucleotide biosynthetic process	4	0.369004	0.754793	Q72JZ7_THET2, NADD_THET2, Q72HE9_THET2, Q72JZ9_THET2	582	11	1772	1.10715	1	0.999865	100
Annotation Cluster 30	Enrichment Score: 0.436751247001791
Category	Term	Count	%	PValue	Genes	List Total	Pop Hits	Pop Total	Fold Enrichment	Bonferroni	Benjamini	FDR
SP_PIR_KEYWORDS	cell cycle	8	0.738007	0.228417	Q72JQ4_THET2, Q72JP4_THET2, Q72GE4_THET2, MURD_THET2, MURB_THET2, MURG_THET2, Q72JB5_THET2, TIG_THET2	1084	20	4254	1.56974	1	0.676224	95.9821
SP_PIR_KEYWORDS	cell division	13	1.19926	0.307796	Q72JP6_THET2, Q72JQ4_THET2, Q72IK4_THET2, Q72JP4_THET2, Q72JA0_THET2, Q72JP5_THET2, Q72JA1_THET2, Q72GE4_THET2, MURD_THET2, MURB_THET2, MURG_THET2, Q72LM3_THET2, Q72JB5_THET2, TIG_THET2	1084	40	4254	1.27542	1	0.775861	98.9539
GOTERM_BP_FAT	GO:0007049~cell cycle	14	1.29151	0.348572	Q72GW7_THET2, RSMG_THET2, Q72GE4_THET2, MURD_THET2, MURB_THET2, Q72JB5_THET2, Q72JP4_THET2, Q72JQ4_THET2, Q72JP5_THET2, Q72JA1_THET2, Q72JA2_THET2, Q72IW8_THET2, MURG_THET2, TIG_THET2	582	35	1772	1.21787	1	0.999983	99.8315
GOTERM_BP_FAT	GO:0051301~cell division	14	1.29151	0.730653	Q72IK4_THET2, Q72GE4_THET2, MURD_THET2, MURB_THET2, Q72JB5_THET2, Q72JP6_THET2, Q72JP4_THET2, Q72JQ4_THET2, Q72JA0_THET2, Q72JP5_THET2, Q72JA1_THET2, MURG_THET2, Q72JP8_THET2, Q72LM3_THET2, TIG_THET2	582	44	1772	0.96876	1	0.99981	100
Annotation Cluster 31	Enrichment Score: 0.4183830626473264
Category	Term	Count	%	PValue	Genes	List Total	Pop Hits	Pop Total	Fold Enrichment	Bonferroni	Benjamini	FDR
SP_PIR_KEYWORDS	Histidine biosynthesis	7	0.645756	0.119551	HIS2_THET2, HIS5_THET2, HISX_THET2, FOLD_THET2, HIS1_THET2, HIS6_THET2, HIS4_THET2	1084	14	4254	1.96218	1	0.547807	79.3672
KEGG_PATHWAY	tth00340:Histidine metabolism	10	0.922509	0.280039	HIS2_THET2, Q72GU8_THET2, HIS5_THET2, HISX_THET2, Q72K88_THET2, Q72LK7_THET2, HIS1_THET2, Q72LJ9_THET2, HIS6_THET2, HIS4_THET2	454	20	1244	1.37004	1	0.689076	97.7977
GOTERM_BP_FAT	GO:0000105~histidine biosynthetic process	7	0.645756	0.434285	HIS2_THET2, HIS5_THET2, HISX_THET2, FOLD_THET2, HIS1_THET2, HIS6_THET2, HIS4_THET2	582	16	1772	1.33204	1	0.99989	99.9794
GOTERM_BP_FAT	GO:0009075~histidine family amino acid metabolic process	7	0.645756	0.434285	HIS2_THET2, HIS5_THET2, HISX_THET2, FOLD_THET2, HIS1_THET2, HIS6_THET2, HIS4_THET2	582	16	1772	1.33204	1	0.99989	99.9794
GOTERM_BP_FAT	GO:0009076~histidine family amino acid biosynthetic process	7	0.645756	0.434285	HIS2_THET2, HIS5_THET2, HISX_THET2, FOLD_THET2, HIS1_THET2, HIS6_THET2, HIS4_THET2	582	16	1772	1.33204	1	0.99989	99.9794
GOTERM_BP_FAT	GO:0006547~histidine metabolic process	7	0.645756	0.434285	HIS2_THET2, HIS5_THET2, HISX_THET2, FOLD_THET2, HIS1_THET2, HIS6_THET2, HIS4_THET2	582	16	1772	1.33204	1	0.99989	99.9794
KEGG_PATHWAY	ttj00340:Histidine metabolism	3	0.276753	0.989579	HIS5_THET2, HISX_THET2, HIS1_THET2	454	15	1244	0.548018	1	0.999971	100
Annotation Cluster 32	Enrichment Score: 0.38156422954990044
Category	Term	Count	%	PValue	Genes	List Total	Pop Hits	Pop Total	Fold Enrichment	Bonferroni	Benjamini	FDR
GOTERM_MF_FAT	GO:0016417~S-acyltransferase activity	4	0.369004	0.289321	Q72GZ6_THET2, Q72GP6_THET2, Q72LL1_THET2, Q72GU4_THET2	667	6	2095	2.09395	1	0.999168	99.4238
SP_PIR_KEYWORDS	lipoyl	4	0.369004	0.332848	GCSH_THET2, Q72GZ6_THET2, Q72GP6_THET2, Q72GU4_THET2	1084	8	4254	1.96218	1	0.786605	99.3376
INTERPRO	IPR004167:E3 binding	4	0.369004	0.387008	Q72GZ6_THET2, Q72HF7_THET2, Q72GP6_THET2, Q72GU4_THET2	965	8	3493	1.80984	1	1	99.9729
INTERPRO	IPR000089:Biotin/lipoyl attachment	4	0.369004	0.387008	Q72GZ6_THET2, Q72JL3_THET2, Q72GP6_THET2, Q72GU4_THET2	965	8	3493	1.80984	1	1	99.9729
INTERPRO	IPR003016:2-oxo acid dehydrogenase, lipoyl-binding site	4	0.369004	0.387008	GCSH_THET2, Q72GZ6_THET2, Q72GP6_THET2, Q72GU4_THET2	965	8	3493	1.80984	1	1	99.9729
GOTERM_MF_FAT	GO:0031405~lipoic acid binding	4	0.369004	0.493578	GCSH_THET2, Q72GZ6_THET2, Q72GP6_THET2, Q72GU4_THET2	667	8	2095	1.57046	1	0.999903	99.9965
INTERPRO	IPR001078:2-oxoacid dehydrogenase acyltransferase, catalytic domain	3	0.276753	0.526634	Q72GZ6_THET2, Q72GP6_THET2, Q72GU4_THET2	965	6	3493	1.80984	1	1	99.9996
PIR_SUPERFAMILY	PIRSF000432:dihydrolipoamide acetyltransferase	3	0.276753	0.610711	Q72GZ6_THET2, Q72GP6_THET2, Q72GU4_THET2	677	6	2150	1.58789	1	1	99.9999
Annotation Cluster 33	Enrichment Score: 0.3782224232820827
Category	Term	Count	%	PValue	Genes	List Total	Pop Hits	Pop Total	Fold Enrichment	Bonferroni	Benjamini	FDR
INTERPRO	IPR000878:Tetrapyrrole methylase	6	0.553506	0.337949	Q746P0_THET2, Q72KL3_THET2, Q746P2_THET2, Q746P3_THET2, Q746N6_THET2, Q746P1_THET2	965	14	3493	1.5513	1	1	99.9015
INTERPRO	IPR014777:Tetrapyrrole methylase, subdomain 1	6	0.553506	0.337949	Q746P0_THET2, Q72KL3_THET2, Q746P2_THET2, Q746P3_THET2, Q746N6_THET2, Q746P1_THET2	965	14	3493	1.5513	1	1	99.9015
INTERPRO	IPR003043:Uroporphiryn-III C-methyltransferase, conserved site	4	0.369004	0.387008	Q72KL3_THET2, Q746P2_THET2, Q746N6_THET2, Q746P1_THET2	965	8	3493	1.80984	1	1	99.9729
INTERPRO	IPR014776:Tetrapyrrole methylase, subdomain 2	3	0.276753	0.694527	Q72KL3_THET2, Q746N6_THET2, Q746P1_THET2	965	8	3493	1.35738	1	1	100
Annotation Cluster 34	Enrichment Score: 0.3740642113321275
Category	Term	Count	%	PValue	Genes	List Total	Pop Hits	Pop Total	Fold Enrichment	Bonferroni	Benjamini	FDR
SP_PIR_KEYWORDS	methyltransferase	24	2.21402	0.219646	Q72H04_THET2, Q72GU8_THET2, Q746P0_THET2, Q72K88_THET2, Q746P2_THET2, Q72L94_THET2, TRMFO_THET2, RSMG_THET2, FMT_THET2, Q72IB2_THET2, Q72HL8_THET2, Q72KL3_THET2, TRMI_THET2, PANB_THET2, Q72ID3_THET2, RLMN_THET2, Q746P3_THET2, Q746N6_THET2, RSMA_THET2, Q72K74_THET2, Q72JF4_THET2, Q72KE6_THET2, Q746P1_THET2, TRMB_THET2	1084	77	4254	1.22318	1	0.668533	95.3778
SP_PIR_KEYWORDS	s-adenosyl-l-methionine	11	1.01476	0.43677	Q72KL3_THET2, TRMI_THET2, LIPA_THET2, Q746P2_THET2, RLMN_THET2, RSMG_THET2, RSMA_THET2, Q746N6_THET2, RIMO_THET2, Q746P1_THET2, TRMB_THET2	1084	36	4254	1.19911	1	0.8429	99.9188
GOTERM_MF_FAT	GO:0008173~RNA methyltransferase activity	9	0.830258	0.786739	Q72H04_THET2, TRMI_THET2, Q72L94_THET2, TRMFO_THET2, RLMN_THET2, RSMG_THET2, RSMA_THET2, Q72JF4_THET2, TRMB_THET2	667	30	2095	0.942279	1	0.999997	100
Annotation Cluster 35	Enrichment Score: 0.3690136124002334
Category	Term	Count	%	PValue	Genes	List Total	Pop Hits	Pop Total	Fold Enrichment	Bonferroni	Benjamini	FDR
INTERPRO	IPR000086:NUDIX hydrolase domain	6	0.553506	0.401504	Q72HP2_THET2, Q72HB9_THET2, Q72HG8_THET2, Q72GI9_THET2, Q72LG8_THET2, Q72HB1_THET2	965	15	3493	1.44788	1	1	99.9819
INTERPRO	IPR000086:NUDIX hydrolase, core	6	0.553506	0.401504	Q72HP2_THET2, Q72HB9_THET2, Q72HG8_THET2, Q72GI9_THET2, Q72LG8_THET2, Q72HB1_THET2	965	15	3493	1.44788	1	1	99.9819
PIR_SUPERFAMILY	PIRSF003132:mutator MutT	4	0.369004	0.484819	Q72HB9_THET2, Q72HG8_THET2, Q72GI9_THET2, Q72LG8_THET2	677	8	2150	1.58789	1	1	99.9955
Annotation Cluster 36	Enrichment Score: 0.36618629709788664
Category	Term	Count	%	PValue	Genes	List Total	Pop Hits	Pop Total	Fold Enrichment	Bonferroni	Benjamini	FDR
SP_PIR_KEYWORDS	pyridoxal phosphate	15	1.38376	0.135884	LYSN_THET2, Q72G88_THET2, Q72GY8_THET2, Q72HV9_THET2, Q72LJ9_THET2, Q72LE2_THET2, Q72H54_THET2, Q72K94_THET2, Q72L50_THET2, GCSPB_THET2, Q72KD6_THET2, PDXT_THET2, Q72GN5_THET2, Q72I55_THET2, GLYA_THET2	1084	41	4254	1.43574	1	0.574065	83.6411
SP_PIR_KEYWORDS	Aminotransferase	11	1.01476	0.180725	LYSN_THET2, Q72G88_THET2, Q72I76_THET2, GLMS_THET2, Q72IQ8_THET2, Q72LJ9_THET2, Q72GH8_THET2, Q72KD6_THET2, Q72GN5_THET2, Q72K94_THET2, Q72H54_THET2	1084	29	4254	1.48855	1	0.625041	91.5495
INTERPRO	IPR015421:Pyridoxal phosphate-dependent transferase, major region, subdomain 1	15	1.38376	0.281929	LYSN_THET2, Q72G88_THET2, Q72HV9_THET2, Q72LH2_THET2, Q72LJ9_THET2, Q72LA9_THET2, Q72H54_THET2, Q72K94_THET2, Q72I76_THET2, Q72KV7_THET2, Q72L50_THET2, GCSPB_THET2, Q72KD6_THET2, Q72GN5_THET2, GLYA_THET2	965	43	3493	1.26268	1	1	99.6149
GOTERM_MF_FAT	GO:0019842~vitamin binding	27	2.49077	0.518771	LYSN_THET2, Q72GY8_THET2, Q72LJ9_THET2, Q72LA9_THET2, Q72JU2_THET2, Q72K94_THET2, Q72I76_THET2, Q72KD6_THET2, Q72GZ7_THET2, Q746J7_THET2, GLYA_THET2, Q72G88_THET2, ACP_THET2, Q72HV9_THET2, Q72LH2_THET2, Q72JL3_THET2, Q72LE2_THET2, Q72JL4_THET2, Q72H54_THET2, Q72J97_THET2, Q72KV7_THET2, Q72HA3_THET2, Q72L50_THET2, Q72JC6_THET2, GCSPB_THET2, Q72GN5_THET2, Q72JU1_THET2	667	81	2095	1.04698	1	0.999916	99.9984
GOTERM_MF_FAT	GO:0008483~transaminase activity	11	1.01476	0.545624	LYSN_THET2, Q72G88_THET2, Q72I76_THET2, GLMS_THET2, Q72IQ8_THET2, Q72LJ9_THET2, Q72GH8_THET2, Q72KD6_THET2, Q72GN5_THET2, Q72K94_THET2, Q72H54_THET2	667	31	2095	1.11452	1	0.999932	99.9993
GOTERM_MF_FAT	GO:0016769~transferase activity, transferring nitrogenous groups	11	1.01476	0.680039	LYSN_THET2, Q72G88_THET2, Q72I76_THET2, GLMS_THET2, Q72IQ8_THET2, Q72LJ9_THET2, Q72GH8_THET2, Q72KD6_THET2, Q72GN5_THET2, Q72K94_THET2, Q72H54_THET2	667	34	2095	1.01618	1	0.999988	100
INTERPRO	IPR004839:Aminotransferase, class I and II	5	0.461255	0.683793	LYSN_THET2, Q72G88_THET2, Q72I76_THET2, Q72LJ9_THET2, Q72H54_THET2	965	16	3493	1.13115	1	1	100
GOTERM_MF_FAT	GO:0070279~vitamin B6 binding	17	1.56827	0.745307	LYSN_THET2, Q72G88_THET2, Q72GY8_THET2, Q72HV9_THET2, Q72LH2_THET2, Q72LJ9_THET2, Q72LE2_THET2, Q72LA9_THET2, Q72H54_THET2, Q72K94_THET2, Q72I76_THET2, Q72KV7_THET2, Q72L50_THET2, GCSPB_THET2, Q72KD6_THET2, Q72GN5_THET2, GLYA_THET2	667	56	2095	0.953496	1	0.999994	100
GOTERM_MF_FAT	GO:0030170~pyridoxal phosphate binding	17	1.56827	0.745307	LYSN_THET2, Q72G88_THET2, Q72GY8_THET2, Q72HV9_THET2, Q72LH2_THET2, Q72LJ9_THET2, Q72LE2_THET2, Q72LA9_THET2, Q72H54_THET2, Q72K94_THET2, Q72I76_THET2, Q72KV7_THET2, Q72L50_THET2, GCSPB_THET2, Q72KD6_THET2, Q72GN5_THET2, GLYA_THET2	667	56	2095	0.953496	1	0.999994	100
Annotation Cluster 37	Enrichment Score: 0.3548985887678638
Category	Term	Count	%	PValue	Genes	List Total	Pop Hits	Pop Total	Fold Enrichment	Bonferroni	Benjamini	FDR
SP_PIR_KEYWORDS	iron	21	1.93727	0.156491	ISPH_THET2, Q72KM0_THET2, Q72IU8_THET2, Q72GD3_THET2, Q72HC7_THET2, Q72GN9_THET2, Q72HJ7_THET2, ILVD_THET2, NUOI_THET2, HEMH_THET2, ISPG_THET2, Q72GD4_THET2, LIPA_THET2, LEUC_THET2, RLMN_THET2, Q746J6_THET2, DEF_THET2, Q72GR2_THET2, CCME_THET2, LUXS_THET2, RIMO_THET2	1084	63	4254	1.30812	1	0.607814	87.8714
SP_PIR_KEYWORDS	iron-sulfur	16	1.47601	0.170387	ISPH_THET2, Q72IU8_THET2, Q72KM0_THET2, Q72GD3_THET2, Q72HC7_THET2, Q72GN9_THET2, Q72HJ7_THET2, ILVD_THET2, NUOI_THET2, ISPG_THET2, Q72GD4_THET2, LIPA_THET2, LEUC_THET2, RLMN_THET2, Q72GR2_THET2, RIMO_THET2	1084	46	4254	1.36499	1	0.62103	90.1283
SP_PIR_KEYWORDS	4fe-4s	11	1.01476	0.320547	NUOI_THET2, ISPG_THET2, Q72GD4_THET2, LIPA_THET2, LEUC_THET2, RLMN_THET2, Q72KM0_THET2, Q72GD3_THET2, Q72GN9_THET2, ILVD_THET2, RIMO_THET2	1084	33	4254	1.30812	1	0.785113	99.1693
GOTERM_MF_FAT	GO:0051539~4 iron, 4 sulfur cluster binding	18	1.66052	0.762946	Q72KV4_THET2, Q72LD2_THET2, Q72KM0_THET2, Q72GD3_THET2, Q72GN9_THET2, Q72KN3_THET2, ILVD_THET2, Q72KR6_THET2, NUOI_THET2, ISPG_THET2, Q72GD4_THET2, LIPA_THET2, LEUC_THET2, RLMN_THET2, Q72GR2_THET2, Q72HF2_THET2, RIMO_THET2, Q72LE7_THET2	667	60	2095	0.942279	1	0.999996	100
GOTERM_MF_FAT	GO:0051540~metal cluster binding	30	2.76753	0.763604	Q72KV4_THET2, Q72LD2_THET2, Q72KM0_THET2, Q72IU8_THET2, Q72GD3_THET2, Q72HC7_THET2, Q72HV8_THET2, Q72JM0_THET2, Q72I78_THET2, Q72GN9_THET2, Q72HJ7_THET2, Q72KN3_THET2, Q72KR6_THET2, NUOI_THET2, Q72IY0_THET2, RLMN_THET2, Q72LP6_THET2, Q72I60_THET2, ISPH_THET2, Q72GL4_THET2, ILVD_THET2, ISPG_THET2, Q72GD4_THET2, Q72IP3_THET2, LIPA_THET2, LEUC_THET2, Q72GR2_THET2, Q72HF2_THET2, Q72LE7_THET2, RIMO_TH…	667	100	2095	0.942279	1	0.999995	100
GOTERM_MF_FAT	GO:0051536~iron-sulfur cluster binding	30	2.76753	0.763604	Q72KV4_THET2, Q72LD2_THET2, Q72KM0_THET2, Q72IU8_THET2, Q72GD3_THET2, Q72HC7_THET2, Q72HV8_THET2, Q72JM0_THET2, Q72I78_THET2, Q72GN9_THET2, Q72HJ7_THET2, Q72KN3_THET2, Q72KR6_THET2, NUOI_THET2, Q72IY0_THET2, RLMN_THET2, Q72LP6_THET2, Q72I60_THET2, ISPH_THET2, Q72GL4_THET2, ILVD_THET2, ISPG_THET2, Q72GD4_THET2, Q72IP3_THET2, LIPA_THET2, LEUC_THET2, Q72GR2_THET2, Q72HF2_THET2, Q72LE7_THET2, RIMO_TH…	667	100	2095	0.942279	1	0.999995	100
GOTERM_MF_FAT	GO:0005506~iron ion binding	31	2.85978	0.862308	Q72LD2_THET2, Q72KM0_THET2, Q72IU8_THET2, Q72GD3_THET2, Q72HC7_THET2, Q72HV8_THET2, Q72GN9_THET2, Q72HJ7_THET2, Q72IS4_THET2, NUOI_THET2, RLMN_THET2, DEF_THET2, CCME_THET2, Q72H23_THET2, Q72H24_THET2, ISPH_THET2, ILVD_THET2, HEMH_THET2, ISPG_THET2, Q72JK2_THET2, Q72GD4_THET2, LIPA_THET2, Q72HC5_THET2, LEUC_THET2, Q746J6_THET2, Q72GR2_THET2, LUXS_THET2, Q72IU7_THET2, Q72KW6_THET2, Q72LE7_THET2, RI…	667	109	2095	0.893292	1	1	100
Annotation Cluster 38	Enrichment Score: 0.3419932677310972
Category	Term	Count	%	PValue	Genes	List Total	Pop Hits	Pop Total	Fold Enrichment	Bonferroni	Benjamini	FDR
SMART	SM00382:AAA	36	3.32103	0.178191	Q72IK4_THET2, RECA_THET2, Q72GR3_THET2, Q72GK4_THET2, CLPX_THET2, Q72HD4_THET2, Q72I66_THET2, Q72K45_THET2, Q72J05_THET2, Q72I50_THET2, Q72J43_THET2, Q72L01_THET2, Q72LM3_THET2, Q72K18_THET2, Q72L45_THET2, Q72L87_THET2, Q72J04_THET2, Q72J11_THET2, Q72GB4_THET2, CLPB_THET2, Q72LH6_THET2, Q72JH7_THET2, Q72IQ7_THET2, Q72IN7_THET2, Q72HA7_THET2, Q72L52_THET2, Q72IJ7_THET2, Q72HG0_THET2, Q72J13_THET2,…	143	119	552	1.16777	1	1	87.3881
INTERPRO	IPR003593:ATPase, AAA+ type, core	36	3.32103	0.359941	Q72IK4_THET2, RECA_THET2, Q72GR3_THET2, Q72GK4_THET2, CLPX_THET2, Q72HD4_THET2, Q72I66_THET2, Q72K45_THET2, Q72J05_THET2, Q72I50_THET2, Q72J43_THET2, Q72L01_THET2, Q72LM3_THET2, Q72K18_THET2, Q72L45_THET2, Q72L87_THET2, Q72J04_THET2, Q72J11_THET2, Q72GB4_THET2, CLPB_THET2, Q72LH6_THET2, Q72JH7_THET2, Q72IQ7_THET2, Q72IN7_THET2, Q72HA7_THET2, Q72L52_THET2, Q72IJ7_THET2, Q72HG0_THET2, Q72J13_THET2,…	965	119	3493	1.09503	1	1	99.9441
INTERPRO	IPR003439:ABC transporter-like	22	2.02952	0.596954	Q72J04_THET2, Q72J11_THET2, Q72GB4_THET2, Q72LH6_THET2, Q72HD4_THET2, Q72I66_THET2, Q72IQ7_THET2, Q72JH7_THET2, Q72IN7_THET2, Q72L52_THET2, Q72K45_THET2, Q72J05_THET2, Q72HG0_THET2, Q72J13_THET2, Q72LI8_THET2, Q72LF8_THET2, Q72J43_THET2, Q72J12_THET2, Q72HK0_THET2, Q72LF7_THET2, Q72KS2_THET2, Q72K18_THET2, Q72IR1_THET2, Q72JN6_THET2, Q72L45_THET2	965	78	3493	1.02094	1	1	100
GOTERM_MF_FAT	GO:0016887~ATPase activity	41	3.78229	0.679872	RECA_THET2, Q72J77_THET2, Q72HW1_THET2, Q72JY0_THET2, CLPX_THET2, Q745W4_THET2, Q72HD4_THET2, Q72I66_THET2, Q72KH0_THET2, Q72K45_THET2, Q72J05_THET2, Q72J43_THET2, Q72L01_THET2, Q72HK0_THET2, Q72KF9_THET2, Q72K18_THET2, Q72L45_THET2, Q72G97_THET2, VATB_THET2, VATA_THET2, Q72J04_THET2, VATE_THET2, Q72J11_THET2, Q72GB4_THET2, Q72LH6_THET2, Q72KB4_THET2, Q72JH7_THET2, Q72IQ7_THET2, Q72IN7_THET2, Q72…	667	132	2095	0.975592	1	0.99999	100
INTERPRO	IPR017871:ABC transporter, conserved site	17	1.56827	0.749113	Q72J04_THET2, Q72J11_THET2, Q72GB4_THET2, Q72LH6_THET2, Q72I66_THET2, Q72IQ7_THET2, Q72JH7_THET2, Q72L52_THET2, Q72HG0_THET2, Q72K68_THET2, Q72LI8_THET2, Q72LF8_THET2, Q72J43_THET2, Q72HK0_THET2, Q72LF7_THET2, Q72KS2_THET2, Q72K18_THET2, Q72IR1_THET2, Q72JN6_THET2	965	65	3493	0.946688	1	1	100
Annotation Cluster 39	Enrichment Score: 0.3357321676840538
Category	Term	Count	%	PValue	Genes	List Total	Pop Hits	Pop Total	Fold Enrichment	Bonferroni	Benjamini	FDR
KEGG_PATHWAY	tth00550:Peptidoglycan biosynthesis	9	0.830258	0.031938	Q72JQ4_THET2, UPPP_THET2, Q72J59_THET2, Q72GE4_THET2, MURD_THET2, MURB_THET2, MURG_THET2, Q72JP8_THET2, DDL_THET2	454	12	1244	2.05507	0.984311	0.196415	31.4055
GOTERM_MF_FAT	GO:0016881~acid-amino acid ligase activity	10	0.922509	0.113574	Q72JQ4_THET2, PANC_THET2, Q72II1_THET2, Q72GE4_THET2, Q72J06_THET2, Q72H55_THET2, MURD_THET2, Q72ID7_THET2, Q72JP8_THET2, DDL_THET2	667	19	2095	1.65312	1	0.993307	83.7999
INTERPRO	IPR004101:Mur ligase, C-terminal	6	0.553506	0.215382	Q72JQ4_THET2, Q72GE4_THET2, Q72J06_THET2, Q72H55_THET2, MURD_THET2, Q72JP8_THET2	965	12	3493	1.80984	1	1	98.295
INTERPRO	IPR013221:Mur ligase, central	6	0.553506	0.215382	Q72JQ4_THET2, Q72GE4_THET2, Q72J06_THET2, Q72H55_THET2, MURD_THET2, Q72JP8_THET2	965	12	3493	1.80984	1	1	98.295
SP_PIR_KEYWORDS	cell cycle	8	0.738007	0.228417	Q72JQ4_THET2, Q72JP4_THET2, Q72GE4_THET2, MURD_THET2, MURB_THET2, MURG_THET2, Q72JB5_THET2, TIG_THET2	1084	20	4254	1.56974	1	0.676224	95.9821
SP_PIR_KEYWORDS	peptidoglycan synthesis	8	0.738007	0.365432	Q72JQ4_THET2, UPPP_THET2, Q72GE4_THET2, Q72JF3_THET2, MURD_THET2, MURB_THET2, MURG_THET2, DDL_THET2	1084	23	4254	1.36499	1	0.799052	99.6439
SP_PIR_KEYWORDS	cell wall biogenesis/degradation	8	0.738007	0.365432	Q72JQ4_THET2, UPPP_THET2, Q72GE4_THET2, Q72JF3_THET2, MURD_THET2, MURB_THET2, MURG_THET2, DDL_THET2	1084	23	4254	1.36499	1	0.799052	99.6439
SP_PIR_KEYWORDS	cell shape	8	0.738007	0.365432	Q72JQ4_THET2, UPPP_THET2, Q72GE4_THET2, Q72JF3_THET2, MURD_THET2, MURB_THET2, MURG_THET2, DDL_THET2	1084	23	4254	1.36499	1	0.799052	99.6439
GOTERM_BP_FAT	GO:0008360~regulation of cell shape	12	1.10701	0.440163	Q72JQ4_THET2, UPPP_THET2, Q72JE6_THET2, Q72GE4_THET2, Q72JA2_THET2, Q72JF3_THET2, MURD_THET2, MURB_THET2, Q72JE5_THET2, MURG_THET2, Q72JP8_THET2, DDL_THET2	582	31	1772	1.17858	1	0.999688	99.9824
GOTERM_BP_FAT	GO:0022604~regulation of cell morphogenesis	12	1.10701	0.440163	Q72JQ4_THET2, UPPP_THET2, Q72JE6_THET2, Q72GE4_THET2, Q72JA2_THET2, Q72JF3_THET2, MURD_THET2, MURB_THET2, Q72JE5_THET2, MURG_THET2, Q72JP8_THET2, DDL_THET2	582	31	1772	1.17858	1	0.999688	99.9824
PIR_SUPERFAMILY	PIRSF001562:UDP-N-acetylmuramate-alanine ligase	4	0.369004	0.484819	Q72JQ4_THET2, Q72GE4_THET2, MURD_THET2, Q72JP8_THET2	677	8	2150	1.58789	1	1	99.9955
INTERPRO	IPR000713:Mur ligase, N-terminal	3	0.276753	0.526634	Q72JQ4_THET2, Q72GE4_THET2, Q72JP8_THET2	965	6	3493	1.80984	1	1	99.9996
GOTERM_BP_FAT	GO:0070589~cellular component macromolecule biosynthetic process	10	0.922509	0.648803	Q72JQ4_THET2, UPPP_THET2, Q72JN2_THET2, Q72GE4_THET2, Q72JF3_THET2, MURD_THET2, MURB_THET2, MURG_THET2, Q72JP8_THET2, DDL_THET2	582	29	1772	1.04989	1	0.999769	100
GOTERM_BP_FAT	GO:0010382~cellular cell wall macromolecule metabolic process	10	0.922509	0.648803	Q72JQ4_THET2, UPPP_THET2, Q72JN2_THET2, Q72GE4_THET2, Q72JF3_THET2, MURD_THET2, MURB_THET2, MURG_THET2, Q72JP8_THET2, DDL_THET2	582	29	1772	1.04989	1	0.999769	100
GOTERM_BP_FAT	GO:0006023~aminoglycan biosynthetic process	10	0.922509	0.648803	Q72JQ4_THET2, UPPP_THET2, Q72JN2_THET2, Q72GE4_THET2, Q72JF3_THET2, MURD_THET2, MURB_THET2, MURG_THET2, Q72JP8_THET2, DDL_THET2	582	29	1772	1.04989	1	0.999769	100
GOTERM_BP_FAT	GO:0006024~glycosaminoglycan biosynthetic process	10	0.922509	0.648803	Q72JQ4_THET2, UPPP_THET2, Q72JN2_THET2, Q72GE4_THET2, Q72JF3_THET2, MURD_THET2, MURB_THET2, MURG_THET2, Q72JP8_THET2, DDL_THET2	582	29	1772	1.04989	1	0.999769	100
GOTERM_BP_FAT	GO:0009252~peptidoglycan biosynthetic process	10	0.922509	0.648803	Q72JQ4_THET2, UPPP_THET2, Q72JN2_THET2, Q72GE4_THET2, Q72JF3_THET2, MURD_THET2, MURB_THET2, MURG_THET2, Q72JP8_THET2, DDL_THET2	582	29	1772	1.04989	1	0.999769	100
GOTERM_BP_FAT	GO:0044038~cell wall macromolecule biosynthetic process	10	0.922509	0.648803	Q72JQ4_THET2, UPPP_THET2, Q72JN2_THET2, Q72GE4_THET2, Q72JF3_THET2, MURD_THET2, MURB_THET2, MURG_THET2, Q72JP8_THET2, DDL_THET2	582	29	1772	1.04989	1	0.999769	100
GOTERM_BP_FAT	GO:0045229~external encapsulating structure organization	8	0.738007	0.671381	Q72JQ4_THET2, UPPP_THET2, Q72GE4_THET2, Q72JF3_THET2, MURD_THET2, MURB_THET2, MURG_THET2, DDL_THET2	582	23	1772	1.05902	1	0.99977	100
GOTERM_BP_FAT	GO:0007047~cell wall organization	8	0.738007	0.671381	Q72JQ4_THET2, UPPP_THET2, Q72GE4_THET2, Q72JF3_THET2, MURD_THET2, MURB_THET2, MURG_THET2, DDL_THET2	582	23	1772	1.05902	1	0.99977	100
GOTERM_BP_FAT	GO:0000270~peptidoglycan metabolic process	11	1.01476	0.683328	Q72JQ4_THET2, UPPP_THET2, Q72JN2_THET2, Q72GE4_THET2, Q72KA2_THET2, Q72JF3_THET2, MURD_THET2, MURB_THET2, MURG_THET2, Q72JP8_THET2, DDL_THET2	582	33	1772	1.01489	1	0.999767	100
GOTERM_BP_FAT	GO:0006022~aminoglycan metabolic process	11	1.01476	0.683328	Q72JQ4_THET2, UPPP_THET2, Q72JN2_THET2, Q72GE4_THET2, Q72KA2_THET2, Q72JF3_THET2, MURD_THET2, MURB_THET2, MURG_THET2, Q72JP8_THET2, DDL_THET2	582	33	1772	1.01489	1	0.999767	100
GOTERM_BP_FAT	GO:0030203~glycosaminoglycan metabolic process	11	1.01476	0.683328	Q72JQ4_THET2, UPPP_THET2, Q72JN2_THET2, Q72GE4_THET2, Q72KA2_THET2, Q72JF3_THET2, MURD_THET2, MURB_THET2, MURG_THET2, Q72JP8_THET2, DDL_THET2	582	33	1772	1.01489	1	0.999767	100
GOTERM_BP_FAT	GO:0044036~cell wall macromolecule metabolic process	11	1.01476	0.683328	Q72JQ4_THET2, UPPP_THET2, Q72GX9_THET2, Q72JN2_THET2, Q72GE4_THET2, Q72JF3_THET2, MURD_THET2, MURB_THET2, MURG_THET2, Q72JP8_THET2, DDL_THET2	582	33	1772	1.01489	1	0.999767	100
GOTERM_BP_FAT	GO:0000271~polysaccharide biosynthetic process	13	1.19926	0.739702	UPPP_THET2, Q72GE4_THET2, Q72KZ1_THET2, MURB_THET2, MURD_THET2, Q72J33_THET2, DDL_THET2, Q72JQ4_THET2, Q72JN2_THET2, Q72JF3_THET2, MURG_THET2, Q72JP8_THET2, FABZ_THET2	582	41	1772	0.965384	1	0.999834	100
GOTERM_BP_FAT	GO:0042546~cell wall biogenesis	10	0.922509	0.772439	Q72JQ4_THET2, UPPP_THET2, Q72JN2_THET2, Q72GE4_THET2, Q72JF3_THET2, MURD_THET2, MURB_THET2, MURG_THET2, Q72JP8_THET2, DDL_THET2	582	32	1772	0.95146	1	0.999899	100
GOTERM_BP_FAT	GO:0009273~peptidoglycan-based cell wall biogenesis	10	0.922509	0.772439	Q72JQ4_THET2, UPPP_THET2, Q72JN2_THET2, Q72GE4_THET2, Q72JF3_THET2, MURD_THET2, MURB_THET2, MURG_THET2, Q72JP8_THET2, DDL_THET2	582	32	1772	0.95146	1	0.999899	100
GOTERM_BP_FAT	GO:0016051~carbohydrate biosynthetic process	19	1.75277	0.780151	Q72K29_THET2, TPIS_THET2, UPPP_THET2, Q72KV4_THET2, Q72KZ1_THET2, Q72GE4_THET2, MURD_THET2, MURB_THET2, Q72J33_THET2, DDL_THET2, Q72JQ4_THET2, Q72JN2_THET2, GPDA_THET2, GLMS_THET2, Q72JF3_THET2, MURG_THET2, Q72JP8_THET2, FABZ_THET2, Q72K30_THET2	582	62	1772	0.933045	1	0.999902	100
GOTERM_BP_FAT	GO:0005976~polysaccharide metabolic process	15	1.38376	0.783797	UPPP_THET2, Q72GE4_THET2, Q72KZ1_THET2, MURB_THET2, MURD_THET2, Q72HU6_THET2, Q72J33_THET2, DDL_THET2, Q72JQ4_THET2, Q72JN2_THET2, Q72KA2_THET2, Q72JF3_THET2, MURG_THET2, Q72JP8_THET2, FABZ_THET2	582	49	1772	0.932043	1	0.999904	100
Annotation Cluster 40	Enrichment Score: 0.32920723107303507
Category	Term	Count	%	PValue	Genes	List Total	Pop Hits	Pop Total	Fold Enrichment	Bonferroni	Benjamini	FDR
KEGG_PATHWAY	tth00860:Porphyrin and chlorophyll metabolism	20	1.84502	0.00121491	Q746P0_THET2, Q746P2_THET2, Q746N9_THET2, Q746P8_THET2, Q72L33_THET2, Q746N0_THET2, Q746N4_THET2, Q746N5_THET2, HEM1_THET2, COXX_THET2, Q72KL3_THET2, HEM3_THET2, HEMH_THET2, CBID_THET2, Q746P3_THET2, Q72KM1_THET2, Q746N6_THET2, Q746Q1_THET2, Q746Q0_THET2, Q746P1_THET2	454	29	1244	1.88972	0.144101	0.0192624	1.40185
GOTERM_BP_FAT	GO:0033013~tetrapyrrole metabolic process	21	1.93727	0.549364	Q746P0_THET2, Q746P2_THET2, Q746N9_THET2, Q746P8_THET2, Q72GR3_THET2, Q72L33_THET2, Q746N0_THET2, Q746N4_THET2, HEM1_THET2, COXX_THET2, Q72KL3_THET2, HEM3_THET2, HEMH_THET2, Q72JA0_THET2, CBID_THET2, Q746P3_THET2, Q72KM1_THET2, Q746N6_THET2, Q746Q1_THET2, Q746Q0_THET2, Q746P1_THET2	582	61	1772	1.04817	1	0.999696	99.9993
GOTERM_BP_FAT	GO:0033014~tetrapyrrole biosynthetic process	21	1.93727	0.549364	Q746P0_THET2, Q746P2_THET2, Q746N9_THET2, Q746P8_THET2, Q72GR3_THET2, Q72L33_THET2, Q746N0_THET2, Q746N4_THET2, HEM1_THET2, COXX_THET2, Q72KL3_THET2, HEM3_THET2, HEMH_THET2, Q72JA0_THET2, CBID_THET2, Q746P3_THET2, Q72KM1_THET2, Q746N6_THET2, Q746Q1_THET2, Q746Q0_THET2, Q746P1_THET2	582	61	1772	1.04817	1	0.999696	99.9993
GOTERM_BP_FAT	GO:0006778~porphyrin metabolic process	20	1.84502	0.588443	Q746P0_THET2, Q746P2_THET2, Q746N9_THET2, Q746P8_THET2, Q72GR3_THET2, Q72L33_THET2, Q746N0_THET2, Q746N4_THET2, HEM1_THET2, COXX_THET2, Q72KL3_THET2, HEM3_THET2, HEMH_THET2, Q72JA0_THET2, CBID_THET2, Q746P3_THET2, Q746N6_THET2, Q746Q1_THET2, Q746Q0_THET2, Q746P1_THET2	582	59	1772	1.03209	1	0.999765	99.9998
GOTERM_BP_FAT	GO:0006779~porphyrin biosynthetic process	20	1.84502	0.588443	Q746P0_THET2, Q746P2_THET2, Q746N9_THET2, Q746P8_THET2, Q72GR3_THET2, Q72L33_THET2, Q746N0_THET2, Q746N4_THET2, HEM1_THET2, COXX_THET2, Q72KL3_THET2, HEM3_THET2, HEMH_THET2, Q72JA0_THET2, CBID_THET2, Q746P3_THET2, Q746N6_THET2, Q746Q1_THET2, Q746Q0_THET2, Q746P1_THET2	582	59	1772	1.03209	1	0.999765	99.9998
GOTERM_BP_FAT	GO:0051188~cofactor biosynthetic process	45	4.15129	0.648992	Q72LK4_THET2, COAX_THET2, Q746P0_THET2, Q72JZ7_THET2, PANC_THET2, Q746P2_THET2, Q746N9_THET2, COAE_THET2, Q746P8_THET2, Q72HE9_THET2, Q72GR3_THET2, Q746N0_THET2, Q72HV8_THET2, Q72HL9_THET2, Q746N4_THET2, Q72KR6_THET2, HEM3_THET2, FOLD_THET2, Q72GF4_THET2, PANB_THET2, Q72HJ8_THET2, Q746N6_THET2, PDXT_THET2, Q72GQ3_THET2, Q746P1_THET2, Q72I60_THET2, NADD_THET2, Q72L33_THET2, Q72ID7_THET2, Q72JZ9_TH…	582	139	1772	0.985686	1	0.999744	100
GOTERM_BP_FAT	GO:0018130~heterocycle biosynthetic process	44	4.05904	0.673954	Q746P0_THET2, Q746P2_THET2, Q746N9_THET2, Q746P8_THET2, Q72GR3_THET2, Q72LK3_THET2, Q746N0_THET2, Q72HL9_THET2, Q746N4_THET2, HEM3_THET2, FOLD_THET2, HISX_THET2, Q72GF4_THET2, HIS1_THET2, Q746N6_THET2, HIS6_THET2, THII_THET2, Q746P1_THET2, PROB_THET2, Q72HJ4_THET2, Q72IB9_THET2, TRPA_THET2, THIE_THET2, Q72L33_THET2, HIS4_THET2, HEM1_THET2, P5CR_THET2, COXX_THET2, HIS2_THET2, Q72KL3_THET2, HEMH_TH…	582	137	1772	0.977851	1	0.999737	100
GOTERM_BP_FAT	GO:0009235~cobalamin metabolic process	11	1.01476	0.683328	Q746P0_THET2, Q72JA0_THET2, Q746P2_THET2, CBID_THET2, Q746N9_THET2, Q746P3_THET2, Q746P8_THET2, Q746Q1_THET2, Q746N0_THET2, Q746Q0_THET2, Q746N4_THET2	582	33	1772	1.01489	1	0.999767	100
GOTERM_BP_FAT	GO:0009236~cobalamin biosynthetic process	11	1.01476	0.683328	Q746P0_THET2, Q72JA0_THET2, Q746P2_THET2, CBID_THET2, Q746N9_THET2, Q746P3_THET2, Q746P8_THET2, Q746Q1_THET2, Q746N0_THET2, Q746Q0_THET2, Q746N4_THET2	582	33	1772	1.01489	1	0.999767	100
GOTERM_BP_FAT	GO:0051186~cofactor metabolic process	55	5.0738	0.68747	Q72LK4_THET2, Q746P0_THET2, TPIS_THET2, Q72JZ7_THET2, Q746P8_THET2, Q72HE9_THET2, Q72GR3_THET2, Q746N4_THET2, Q72KR6_THET2, HEM3_THET2, Q72GZ6_THET2, Q72HJ8_THET2, Q746N6_THET2, PDXT_THET2, Q72GU9_THET2, Q72I60_THET2, Q72L33_THET2, Q72JZ9_THET2, TAL_THET2, HEMH_THET2, Q72JA0_THET2, Q72GP5_THET2, Q72HJ9_THET2, Q72J06_THET2, Q72GQ2_THET2, LIPB_THET2, COAX_THET2, MDH_THET2, Q746P2_THET2, PANC_THET2,…	582	172	1772	0.973587	1	0.999744	100
GOTERM_BP_FAT	GO:0006732~coenzyme metabolic process	30	2.76753	0.78811	Q72LK4_THET2, MDH_THET2, COAX_THET2, TPIS_THET2, Q72JZ7_THET2, PANC_THET2, COAE_THET2, Q72HE9_THET2, Q72HL9_THET2, Q72GZ6_THET2, RPIA_THET2, FOLD_THET2, Q72GF4_THET2, PANB_THET2, CAPP_THET2, PDXT_THET2, Q72GQ3_THET2, Q72GU9_THET2, NADD_THET2, Q72L91_THET2, Q72ID7_THET2, Q72JZ9_THET2, TAL_THET2, Q72IP3_THET2, LIPA_THET2, Q72GP5_THET2, Q72J06_THET2, Q72H55_THET2, Q72GQ2_THET2, LIPB_THET2	582	98	1772	0.932043	1	0.999898	100
GOTERM_BP_FAT	GO:0042364~water-soluble vitamin biosynthetic process	23	2.12177	0.802369	Q746P0_THET2, NADD_THET2, Q72JZ7_THET2, Q746P2_THET2, Q72JR9_THET2, Q746N9_THET2, Q72LA0_THET2, Q746P8_THET2, Q72LK3_THET2, Q72HE9_THET2, THIE_THET2, Q746N0_THET2, Q746N4_THET2, Q72JZ9_THET2, Q72JA0_THET2, CBID_THET2, Q72JS1_THET2, Q746P3_THET2, THII_THET2, Q746Q1_THET2, DXS_THET2, PDXT_THET2, Q746Q0_THET2	582	76	1772	0.921414	1	0.999905	100
GOTERM_BP_FAT	GO:0006767~water-soluble vitamin metabolic process	23	2.12177	0.802369	Q746P0_THET2, NADD_THET2, Q72JZ7_THET2, Q746P2_THET2, Q72JR9_THET2, Q746N9_THET2, Q72LA0_THET2, Q746P8_THET2, Q72LK3_THET2, Q72HE9_THET2, THIE_THET2, Q746N0_THET2, Q746N4_THET2, Q72JZ9_THET2, Q72JA0_THET2, CBID_THET2, Q72JS1_THET2, Q746P3_THET2, THII_THET2, Q746Q1_THET2, DXS_THET2, PDXT_THET2, Q746Q0_THET2	582	76	1772	0.921414	1	0.999905	100
GOTERM_BP_FAT	GO:0009108~coenzyme biosynthetic process	20	1.84502	0.84137	Q72LK4_THET2, COAX_THET2, NADD_THET2, Q72JZ7_THET2, PANC_THET2, COAE_THET2, Q72HE9_THET2, Q72ID7_THET2, Q72HL9_THET2, Q72JZ9_THET2, FOLD_THET2, Q72GF4_THET2, LIPA_THET2, PANB_THET2, Q72GP5_THET2, Q72J06_THET2, Q72H55_THET2, PDXT_THET2, Q72GQ3_THET2, LIPB_THET2	582	68	1772	0.895492	1	0.999954	100
GOTERM_BP_FAT	GO:0006766~vitamin metabolic process	23	2.12177	0.842663	Q746P0_THET2, NADD_THET2, Q72JZ7_THET2, Q746P2_THET2, Q72JR9_THET2, Q746N9_THET2, Q72LA0_THET2, Q746P8_THET2, Q72LK3_THET2, Q72HE9_THET2, THIE_THET2, Q746N0_THET2, Q746N4_THET2, Q72JZ9_THET2, Q72JA0_THET2, CBID_THET2, Q72JS1_THET2, Q746P3_THET2, THII_THET2, Q746Q1_THET2, DXS_THET2, PDXT_THET2, Q746Q0_THET2	582	78	1772	0.897788	1	0.999952	100
GOTERM_BP_FAT	GO:0009110~vitamin biosynthetic process	23	2.12177	0.842663	Q746P0_THET2, NADD_THET2, Q72JZ7_THET2, Q746P2_THET2, Q72JR9_THET2, Q746N9_THET2, Q72LA0_THET2, Q746P8_THET2, Q72LK3_THET2, Q72HE9_THET2, THIE_THET2, Q746N0_THET2, Q746N4_THET2, Q72JZ9_THET2, Q72JA0_THET2, CBID_THET2, Q72JS1_THET2, Q746P3_THET2, THII_THET2, Q746Q1_THET2, DXS_THET2, PDXT_THET2, Q746Q0_THET2	582	78	1772	0.897788	1	0.999952	100
Annotation Cluster 41	Enrichment Score: 0.32461339418602453
Category	Term	Count	%	PValue	Genes	List Total	Pop Hits	Pop Total	Fold Enrichment	Bonferroni	Benjamini	FDR
KEGG_PATHWAY	tth00521:Streptomycin biosynthesis	5	0.461255	0.132842	Q72GC0_THET2, Q72GT6_THET2, Q72H65_THET2, Q72H07_THET2, Q72K80_THET2	454	6	1244	2.28341	1	0.517983	80.8965
KEGG_PATHWAY	tth00052:Galactose metabolism	5	0.461255	0.812091	Q746I3_THET2, Q72H65_THET2, Q72H07_THET2, Q746I4_THET2, Q72K80_THET2	454	14	1244	0.978603	1	0.984943	100
KEGG_PATHWAY	tth00500:Starch and sucrose metabolism	3	0.276753	0.984508	Q72H65_THET2, Q72H07_THET2, Q72K80_THET2	454	14	1244	0.587162	1	0.999949	100
Annotation Cluster 42	Enrichment Score: 0.3108770763349176
Category	Term	Count	%	PValue	Genes	List Total	Pop Hits	Pop Total	Fold Enrichment	Bonferroni	Benjamini	FDR
INTERPRO	IPR011990:Tetratricopeptide-like helical	10	0.922509	0.231418	Q72IM5_THET2, Q72G67_THET2, Q72LK6_THET2, Q72H52_THET2, Q72IC8_THET2, Q72IU7_THET2, Q72H51_THET2, Q72HK1_THET2, Q72L02_THET2, Q72I37_THET2	965	25	3493	1.44788	1	1	98.7945
SMART	SM00028:TPR	6	0.553506	0.454237	Q72G67_THET2, Q72LK6_THET2, Q72IC8_THET2, Q72IU7_THET2, Q72L02_THET2, Q72I37_THET2	143	17	552	1.3624	1	0.999911	99.832
INTERPRO	IPR019734:Tetratricopeptide repeat	6	0.553506	0.524883	Q72G67_THET2, Q72LK6_THET2, Q72IC8_THET2, Q72IU7_THET2, Q72L02_THET2, Q72I37_THET2	965	17	3493	1.27754	1	1	99.9996
INTERPRO	IPR001440:Tetratricopeptide TPR-1	6	0.553506	0.524883	Q72G67_THET2, Q72LK6_THET2, Q72IC8_THET2, Q72IU7_THET2, Q72L02_THET2, Q72I37_THET2	965	17	3493	1.27754	1	1	99.9996
INTERPRO	IPR013026:Tetratricopeptide region	6	0.553506	0.6357	Q72G67_THET2, Q72LK6_THET2, Q72IC8_THET2, Q72IU7_THET2, Q72L02_THET2, Q72I37_THET2	965	19	3493	1.14306	1	1	100
INTERPRO	IPR013105:Tetratricopeptide TPR2	4	0.369004	0.740764	Q72G67_THET2, Q72LK6_THET2, Q72L02_THET2, Q72I37_THET2	965	13	3493	1.11375	1	1	100
Annotation Cluster 43	Enrichment Score: 0.30730386534015236
Category	Term	Count	%	PValue	Genes	List Total	Pop Hits	Pop Total	Fold Enrichment	Bonferroni	Benjamini	FDR
SP_PIR_KEYWORDS	Aminopeptidase	6	0.553506	0.217426	Q72HM9_THET2, Q72I26_THET2, Q72JR5_THET2, Q72GW9_THET2, Q72HF8_THET2, Q72JI4_THET2	1084	13	4254	1.81124	1	0.673132	95.212
GOTERM_MF_FAT	GO:0004177~aminopeptidase activity	6	0.553506	0.545637	Q72HM9_THET2, Q72I26_THET2, Q72JR5_THET2, Q72GW9_THET2, Q72HF8_THET2, Q72JI4_THET2	667	15	2095	1.25637	1	0.99992	99.9993
GOTERM_MF_FAT	GO:0008235~metalloexopeptidase activity	4	0.369004	0.664009	Q72GY3_THET2, Q72I26_THET2, Q72JR5_THET2, Q72GW9_THET2	667	10	2095	1.25637	1	0.999986	100
GOTERM_MF_FAT	GO:0008238~exopeptidase activity	7	0.645756	0.748851	Q72GY3_THET2, Q72HM9_THET2, Q72I26_THET2, Q72JR5_THET2, Q72GW9_THET2, Q72HF8_THET2, Q72JI4_THET2	667	22	2095	0.999387	1	0.999994	100
Annotation Cluster 44	Enrichment Score: 0.2978009716812561
Category	Term	Count	%	PValue	Genes	List Total	Pop Hits	Pop Total	Fold Enrichment	Bonferroni	Benjamini	FDR
SP_PIR_KEYWORDS	glutamine amidotransferase	8	0.738007	0.149266	HIS5_THET2, GLMS_THET2, CARA_THET2, Q746Q1_THET2, GUAA_THET2, PDXT_THET2, Q746N0_THET2, PURQ_THET2	1084	18	4254	1.74416	1	0.599905	86.5189
GOTERM_BP_FAT	GO:0006541~glutamine metabolic process	8	0.738007	0.560955	HIS5_THET2, GLMS_THET2, CARA_THET2, Q746Q1_THET2, GUAA_THET2, PDXT_THET2, Q746N0_THET2, PURQ_THET2	582	21	1772	1.15988	1	0.999698	99.9995
UP_SEQ_FEATURE	active site:Nucleophile	10	0.922509	0.606461	HIS5_THET2, TRUA_THET2, TGT_THET2, CARA_THET2, TRUD_THET2, GUAA_THET2, PDXT_THET2, TRUB_THET2, PURQ_THET2, HEM1_THET2	237	23	593	1.08787	1	1	99.9998
INTERPRO	IPR017926:Glutamine amidotransferase type 1	4	0.369004	0.622469	HIS5_THET2, CARA_THET2, GUAA_THET2, PURQ_THET2	965	11	3493	1.31625	1	1	100
UP_SEQ_FEATURE	domain:Glutamine amidotransferase type-1	4	0.369004	0.681767	HIS5_THET2, CARA_THET2, GUAA_THET2, PURQ_THET2	237	8	593	1.25105	1	1	100
INTERPRO	IPR000991:Glutamine amidotransferase class-I, C-terminal	3	0.276753	0.758136	HIS5_THET2, CARA_THET2, GUAA_THET2	965	9	3493	1.20656	1	1	100
Annotation Cluster 45	Enrichment Score: 0.2954059468978574
Category	Term	Count	%	PValue	Genes	List Total	Pop Hits	Pop Total	Fold Enrichment	Bonferroni	Benjamini	FDR
INTERPRO	IPR006094:FAD linked oxidase, N-terminal	5	0.461255	0.43256	Q72KK5_THET2, Q72LD0_THET2, MURB_THET2, Q72LD1_THET2, Q72GA8_THET2	965	12	3493	1.5082	1	1	99.9926
INTERPRO	IPR016166:FAD-binding, type 2	5	0.461255	0.43256	Q72KK5_THET2, Q72LD0_THET2, MURB_THET2, Q72LD1_THET2, Q72GA8_THET2	965	12	3493	1.5082	1	1	99.9926
INTERPRO	IPR016167:FAD-binding, type 2, subdomain 1	3	0.276753	0.694527	Q72KK5_THET2, Q72LD0_THET2, MURB_THET2	965	8	3493	1.35738	1	1	100
Annotation Cluster 46	Enrichment Score: 0.2946018435424732
Category	Term	Count	%	PValue	Genes	List Total	Pop Hits	Pop Total	Fold Enrichment	Bonferroni	Benjamini	FDR
GOTERM_MF_FAT	GO:0009982~pseudouridine synthase activity	5	0.461255	0.482969	TRUA_THET2, Q72GK1_THET2, TRUD_THET2, TRUB_THET2, Q72GT1_THET2	667	11	2095	1.4277	1	0.999892	99.9953
GOTERM_BP_FAT	GO:0001522~pseudouridine synthesis	5	0.461255	0.512001	TRUA_THET2, Q72GK1_THET2, TRUD_THET2, TRUB_THET2, Q72GT1_THET2	582	11	1772	1.38394	1	0.999635	99.9977
GOTERM_BP_FAT	GO:0031119~tRNA pseudouridine synthesis	3	0.276753	0.528451	TRUA_THET2, TRUD_THET2, TRUB_THET2	582	5	1772	1.8268	1	0.999671	99.9986
Annotation Cluster 47	Enrichment Score: 0.28807283745585005
Category	Term	Count	%	PValue	Genes	List Total	Pop Hits	Pop Total	Fold Enrichment	Bonferroni	Benjamini	FDR
GOTERM_BP_FAT	GO:0046677~response to antibiotic	5	0.461255	0.247166	Q72GX6_THET2, UPPP_THET2, Q72JZ3_THET2, Q72KK9_THET2, RSMA_THET2	582	8	1772	1.90292	1	1	98.545
GOTERM_MF_FAT	GO:0015300~solute:solute antiporter activity	6	0.553506	0.474525	Q72GX6_THET2, Q72JG2_THET2, Q72K84_THET2, Q72JZ3_THET2, Q72G87_THET2, Q72G86_THET2, Q72KK9_THET2, Q72IM4_THET2	667	14	2095	1.34611	1	0.999922	99.994
GOTERM_MF_FAT	GO:0015299~solute:hydrogen antiporter activity	6	0.553506	0.474525	Q72GX6_THET2, Q72JG2_THET2, Q72K84_THET2, Q72JZ3_THET2, Q72G87_THET2, Q72G86_THET2, Q72KK9_THET2, Q72IM4_THET2	667	14	2095	1.34611	1	0.999922	99.994
GOTERM_MF_FAT	GO:0015298~solute:cation antiporter activity	6	0.553506	0.474525	Q72GX6_THET2, Q72JG2_THET2, Q72K84_THET2, Q72JZ3_THET2, Q72G87_THET2, Q72G86_THET2, Q72KK9_THET2, Q72IM4_THET2	667	14	2095	1.34611	1	0.999922	99.994
GOTERM_MF_FAT	GO:0015297~antiporter activity	6	0.553506	0.474525	Q72GX6_THET2, Q72JG2_THET2, Q72K84_THET2, Q72JZ3_THET2, Q72G87_THET2, Q72G86_THET2, Q72KK9_THET2, Q72IM4_THET2	667	14	2095	1.34611	1	0.999922	99.994
GOTERM_MF_FAT	GO:0008493~tetracycline transporter activity	3	0.276753	0.508403	Q72GX6_THET2, Q72JZ3_THET2, Q72KK9_THET2	667	5	2095	1.88456	1	0.999907	99.9978
GOTERM_MF_FAT	GO:0042895~antibiotic transporter activity	3	0.276753	0.508403	Q72GX6_THET2, Q72JZ3_THET2, Q72KK9_THET2	667	5	2095	1.88456	1	0.999907	99.9978
GOTERM_MF_FAT	GO:0015520~tetracycline:hydrogen antiporter activity	3	0.276753	0.508403	Q72GX6_THET2, Q72JZ3_THET2, Q72KK9_THET2	667	5	2095	1.88456	1	0.999907	99.9978
GOTERM_MF_FAT	GO:0015307~drug:hydrogen antiporter activity	3	0.276753	0.508403	Q72GX6_THET2, Q72JZ3_THET2, Q72KK9_THET2	667	5	2095	1.88456	1	0.999907	99.9978
GOTERM_MF_FAT	GO:0015238~drug transporter activity	3	0.276753	0.508403	Q72GX6_THET2, Q72JZ3_THET2, Q72KK9_THET2	667	5	2095	1.88456	1	0.999907	99.9978
GOTERM_BP_FAT	GO:0015893~drug transport	3	0.276753	0.528451	Q72GX6_THET2, Q72JZ3_THET2, Q72KK9_THET2	582	5	1772	1.8268	1	0.999671	99.9986
GOTERM_BP_FAT	GO:0015850~organic alcohol transport	3	0.276753	0.528451	Q72GX6_THET2, Q72JZ3_THET2, Q72KK9_THET2	582	5	1772	1.8268	1	0.999671	99.9986
GOTERM_BP_FAT	GO:0015904~tetracycline transport	3	0.276753	0.528451	Q72GX6_THET2, Q72JZ3_THET2, Q72KK9_THET2	582	5	1772	1.8268	1	0.999671	99.9986
GOTERM_BP_FAT	GO:0042493~response to drug	3	0.276753	0.528451	Q72GX6_THET2, Q72JZ3_THET2, Q72KK9_THET2	582	5	1772	1.8268	1	0.999671	99.9986
GOTERM_BP_FAT	GO:0042891~antibiotic transport	3	0.276753	0.528451	Q72GX6_THET2, Q72JZ3_THET2, Q72KK9_THET2	582	5	1772	1.8268	1	0.999671	99.9986
INTERPRO	IPR006153:Cation/H+ exchanger	3	0.276753	0.758136	Q72JG2_THET2, Q72K84_THET2, Q72G87_THET2, Q72G86_THET2, Q72IM4_THET2	965	9	3493	1.20656	1	1	100
INTERPRO	IPR011701:Major facilitator superfamily MFS-1	8	0.738007	0.952628	Q72GX6_THET2, Q72HP5_THET2, Q72JZ3_THET2, Q72HL7_THET2, Q72KK9_THET2, Q72GR5_THET2, Q72GQ5_THET2, Q72H63_THET2	965	40	3493	0.723938	1	1	100
Annotation Cluster 48	Enrichment Score: 0.2854386866184244
Category	Term	Count	%	PValue	Genes	List Total	Pop Hits	Pop Total	Fold Enrichment	Bonferroni	Benjamini	FDR
SP_PIR_KEYWORDS	purine biosynthesis	9	0.830258	0.0298758	Q72H76_THET2, FOLD_THET2, PURA_THET2, Q72K86_THET2, PURL_THET2, Q72II1_THET2, Q72LJ5_THET2, GUAA_THET2, PURQ_THET2	1084	16	4254	2.20745	0.996559	0.227262	31.3386
GOTERM_BP_FAT	GO:0006163~purine nucleotide metabolic process	22	2.02952	0.233611	Q72H76_THET2, VATB_THET2, VATA_THET2, Q72K86_THET2, PURL_THET2, Q72J68_THET2, VATE_THET2, Q72LJ5_THET2, Q72HW1_THET2, Q72LL5_THET2, PURQ_THET2, Q72LC1_THET2, VATC_THET2, VATD_THET2, FOLD_THET2, KGUA_THET2, PURA_THET2, Q72II1_THET2, GUAA_THET2, Q72KF9_THET2, Q72J67_THET2, Q72LC2_THET2	582	55	1772	1.21787	1	1	98.1018
GOTERM_BP_FAT	GO:0055085~transmembrane transport	14	1.29151	0.303853	SECA_THET2, Q745X6_THET2, VATB_THET2, VATD_THET2, VATA_THET2, Q72KF0_THET2, VATE_THET2, Q72J68_THET2, Q72KN7_THET2, Q72KV1_THET2, Q72J67_THET2, Q72LP0_THET2, Q72GW2_THET2, VATC_THET2	582	34	1772	1.25369	1	0.999999	99.5468
GOTERM_BP_FAT	GO:0009126~purine nucleoside monophosphate metabolic process	8	0.738007	0.307869	Q72H76_THET2, Q72K86_THET2, PURL_THET2, Q72LJ5_THET2, GUAA_THET2, PURQ_THET2, Q72LC1_THET2, Q72LC2_THET2	582	17	1772	1.43279	1	0.999999	99.5842
GOTERM_BP_FAT	GO:0009168~purine ribonucleoside monophosphate biosynthetic process	8	0.738007	0.307869	Q72H76_THET2, Q72K86_THET2, PURL_THET2, Q72LJ5_THET2, GUAA_THET2, PURQ_THET2, Q72LC1_THET2, Q72LC2_THET2	582	17	1772	1.43279	1	0.999999	99.5842
GOTERM_BP_FAT	GO:0009167~purine ribonucleoside monophosphate metabolic process	8	0.738007	0.307869	Q72H76_THET2, Q72K86_THET2, PURL_THET2, Q72LJ5_THET2, GUAA_THET2, PURQ_THET2, Q72LC1_THET2, Q72LC2_THET2	582	17	1772	1.43279	1	0.999999	99.5842
GOTERM_BP_FAT	GO:0009127~purine nucleoside monophosphate biosynthetic process	8	0.738007	0.307869	Q72H76_THET2, Q72K86_THET2, PURL_THET2, Q72LJ5_THET2, GUAA_THET2, PURQ_THET2, Q72LC1_THET2, Q72LC2_THET2	582	17	1772	1.43279	1	0.999999	99.5842
GOTERM_BP_FAT	GO:0006164~purine nucleotide biosynthetic process	20	1.84502	0.327243	Q72H76_THET2, VATB_THET2, VATA_THET2, Q72K86_THET2, PURL_THET2, Q72J68_THET2, VATE_THET2, Q72LJ5_THET2, Q72HW1_THET2, PURQ_THET2, Q72LC1_THET2, VATC_THET2, VATD_THET2, FOLD_THET2, PURA_THET2, Q72II1_THET2, GUAA_THET2, Q72KF9_THET2, Q72J67_THET2, Q72LC2_THET2	582	52	1772	1.17103	1	0.999994	99.7276
GOTERM_BP_FAT	GO:0006119~oxidative phosphorylation	12	1.10701	0.339651	Q72H24_THET2, Q72GE0_THET2, VATB_THET2, VATD_THET2, VATA_THET2, Q72GD4_THET2, Q72GE1_THET2, Q72GD9_THET2, VATE_THET2, Q72J68_THET2, Q72J67_THET2, VATC_THET2	582	29	1772	1.25986	1	0.99999	99.7936
SP_PIR_KEYWORDS	atp synthesis	5	0.461255	0.365386	VATB_THET2, VATD_THET2, VATA_THET2, VATE_THET2, VATC_THET2	1084	12	4254	1.63515	1	0.805108	99.6436
GOTERM_BP_FAT	GO:0009161~ribonucleoside monophosphate metabolic process	9	0.830258	0.37799	Q72H76_THET2, Q72IE8_THET2, Q72K86_THET2, PURL_THET2, Q72LJ5_THET2, GUAA_THET2, PURQ_THET2, Q72LC1_THET2, Q72LC2_THET2	582	21	1772	1.30486	1	0.999945	99.9153
GOTERM_BP_FAT	GO:0009156~ribonucleoside monophosphate biosynthetic process	9	0.830258	0.37799	Q72H76_THET2, Q72IE8_THET2, Q72K86_THET2, PURL_THET2, Q72LJ5_THET2, GUAA_THET2, PURQ_THET2, Q72LC1_THET2, Q72LC2_THET2	582	21	1772	1.30486	1	0.999945	99.9153
GOTERM_BP_FAT	GO:0009150~purine ribonucleotide metabolic process	18	1.66052	0.400064	Q72H76_THET2, VATB_THET2, VATA_THET2, Q72K86_THET2, PURL_THET2, Q72J68_THET2, VATE_THET2, Q72LJ5_THET2, Q72HW1_THET2, Q72LL5_THET2, PURQ_THET2, Q72LC1_THET2, VATC_THET2, VATD_THET2, GUAA_THET2, Q72KF9_THET2, Q72J67_THET2, Q72LC2_THET2	582	48	1772	1.14175	1	0.999912	99.9506
GOTERM_BP_FAT	GO:0009165~nucleotide biosynthetic process	31	2.85978	0.435523	PYRE_THET2, Q72H76_THET2, KAD_THET2, Q72JZ7_THET2, PURL_THET2, Q72J68_THET2, Q72LJ5_THET2, Q72HW1_THET2, Q72HE9_THET2, PURQ_THET2, Q72LC1_THET2, FOLD_THET2, PURA_THET2, Q72II1_THET2, CARA_THET2, Q72KF9_THET2, Q72LC2_THET2, VATB_THET2, VATA_THET2, NADD_THET2, CARB_THET2, Q72K86_THET2, Q72IE8_THET2, VATE_THET2, Q72I58_THET2, Q72JZ9_THET2, VATC_THET2, VATD_THET2, PYRF_THET2, GUAA_THET2, Q72J67_THET2	582	88	1772	1.07256	1	0.999867	99.9801
GOTERM_BP_FAT	GO:0034220~ion transmembrane transport	10	0.922509	0.438999	Q745X6_THET2, VATB_THET2, VATD_THET2, VATA_THET2, VATE_THET2, Q72J68_THET2, Q72KN7_THET2, Q72KV1_THET2, Q72J67_THET2, VATC_THET2	582	25	1772	1.21787	1	0.999816	99.9818
GOTERM_BP_FAT	GO:0009259~ribonucleotide metabolic process	19	1.75277	0.44005	Q72H76_THET2, VATB_THET2, VATA_THET2, Q72IE8_THET2, Q72K86_THET2, PURL_THET2, Q72J68_THET2, VATE_THET2, Q72LJ5_THET2, Q72HW1_THET2, Q72LL5_THET2, PURQ_THET2, Q72LC1_THET2, VATC_THET2, VATD_THET2, GUAA_THET2, Q72KF9_THET2, Q72J67_THET2, Q72LC2_THET2	582	52	1772	1.11248	1	0.999738	99.9823
GOTERM_BP_FAT	GO:0009152~purine ribonucleotide biosynthetic process	17	1.56827	0.440453	Q72H76_THET2, VATB_THET2, VATA_THET2, Q72K86_THET2, PURL_THET2, Q72J68_THET2, VATE_THET2, Q72LJ5_THET2, Q72HW1_THET2, PURQ_THET2, Q72LC1_THET2, VATC_THET2, VATD_THET2, GUAA_THET2, Q72KF9_THET2, Q72J67_THET2, Q72LC2_THET2	582	46	1772	1.12521	1	0.999566	99.9825
GOTERM_BP_FAT	GO:0009260~ribonucleotide biosynthetic process	18	1.66052	0.480437	Q72H76_THET2, VATB_THET2, VATA_THET2, Q72IE8_THET2, Q72K86_THET2, PURL_THET2, Q72J68_THET2, VATE_THET2, Q72LJ5_THET2, Q72HW1_THET2, PURQ_THET2, Q72LC1_THET2, VATC_THET2, VATD_THET2, GUAA_THET2, Q72KF9_THET2, Q72J67_THET2, Q72LC2_THET2	582	50	1772	1.09608	1	0.99973	99.9942
GOTERM_BP_FAT	GO:0034404~nucleobase, nucleoside and nucleotide biosynthetic process	35	3.22878	0.490691	PYRE_THET2, Q72H76_THET2, KAD_THET2, Q72JZ7_THET2, PURL_THET2, Q72J68_THET2, Q72LJ5_THET2, Q72HE9_THET2, Q72HW1_THET2, PURQ_THET2, Q72LC1_THET2, QUEA_THET2, FOLD_THET2, PURA_THET2, Q72II1_THET2, CARA_THET2, Q72KF9_THET2, Q72LC2_THET2, VATB_THET2, NADD_THET2, VATA_THET2, CARB_THET2, TGT_THET2, Q72K86_THET2, Q72IE8_THET2, VATE_THET2, Q72I58_THET2, Q72IH6_THET2, Q72JZ9_THET2, VATC_THET2, VATD_THET2,…	582	102	1772	1.04474	1	0.99971	99.9957
GOTERM_BP_FAT	GO:0034654~nucleobase, nucleoside, nucleotide and nucleic acid biosynthetic process	35	3.22878	0.490691	PYRE_THET2, Q72H76_THET2, KAD_THET2, Q72JZ7_THET2, PURL_THET2, Q72J68_THET2, Q72LJ5_THET2, Q72HE9_THET2, Q72HW1_THET2, PURQ_THET2, Q72LC1_THET2, QUEA_THET2, FOLD_THET2, PURA_THET2, Q72II1_THET2, CARA_THET2, Q72KF9_THET2, Q72LC2_THET2, VATB_THET2, NADD_THET2, VATA_THET2, CARB_THET2, TGT_THET2, Q72K86_THET2, Q72IE8_THET2, VATE_THET2, Q72I58_THET2, Q72IH6_THET2, Q72JZ9_THET2, VATC_THET2, VATD_THET2,…	582	102	1772	1.04474	1	0.99971	99.9957
GOTERM_BP_FAT	GO:0015985~energy coupled proton transport, down electrochemical gradient	7	0.645756	0.503238	VATB_THET2, VATD_THET2, VATA_THET2, VATE_THET2, Q72J68_THET2, Q72J67_THET2, VATC_THET2	582	17	1772	1.25369	1	0.999663	99.997
GOTERM_BP_FAT	GO:0015986~ATP synthesis coupled proton transport	7	0.645756	0.503238	VATB_THET2, VATD_THET2, VATA_THET2, VATE_THET2, Q72J68_THET2, Q72J67_THET2, VATC_THET2	582	17	1772	1.25369	1	0.999663	99.997
GOTERM_MF_FAT	GO:0015078~hydrogen ion transmembrane transporter activity	10	0.922509	0.503781	Q72H24_THET2, VATB_THET2, VATD_THET2, VATA_THET2, VATE_THET2, Q72J68_THET2, Q72HC7_THET2, Q72J67_THET2, Q72H23_THET2, VATC_THET2	667	27	2095	1.16331	1	0.999912	99.9975
GOTERM_MF_FAT	GO:0015077~monovalent inorganic cation transmembrane transporter activity	10	0.922509	0.503781	Q72H24_THET2, VATB_THET2, VATD_THET2, VATA_THET2, VATE_THET2, Q72J68_THET2, Q72HC7_THET2, Q72J67_THET2, Q72H23_THET2, VATC_THET2	667	27	2095	1.16331	1	0.999912	99.9975
GOTERM_BP_FAT	GO:0006188~IMP biosynthetic process	6	0.553506	0.507137	Q72H76_THET2, Q72K86_THET2, PURL_THET2, PURQ_THET2, Q72LC1_THET2, Q72LC2_THET2	582	14	1772	1.30486	1	0.999645	99.9974
GOTERM_BP_FAT	GO:0046040~IMP metabolic process	6	0.553506	0.507137	Q72H76_THET2, Q72K86_THET2, PURL_THET2, PURQ_THET2, Q72LC1_THET2, Q72LC2_THET2	582	14	1772	1.30486	1	0.999645	99.9974
GOTERM_MF_FAT	GO:0015405~P-P-bond-hydrolysis-driven transmembrane transporter activity	13	1.19926	0.52878	Q72I24_THET2, VATB_THET2, VATD_THET2, Q72J05_THET2, VATA_THET2, CBID_THET2, Q72J04_THET2, Q72KF0_THET2, VATE_THET2, Q72HW1_THET2, Q72KF9_THET2, Q72GW2_THET2, Q72KH0_THET2	667	37	2095	1.10357	1	0.999924	99.9988
GOTERM_MF_FAT	GO:0015399~primary active transmembrane transporter activity	13	1.19926	0.52878	Q72I24_THET2, VATB_THET2, VATD_THET2, Q72J05_THET2, VATA_THET2, CBID_THET2, Q72J04_THET2, Q72KF0_THET2, VATE_THET2, Q72HW1_THET2, Q72KF9_THET2, Q72GW2_THET2, Q72KH0_THET2	667	37	2095	1.10357	1	0.999924	99.9988
GOTERM_CC_FAT	GO:0016469~proton-transporting two-sector ATPase complex	7	0.645756	0.535494	VATB_THET2, VATD_THET2, VATA_THET2, VATE_THET2, Q72J68_THET2, Q72J67_THET2, VATC_THET2	169	17	499	1.2158	1	0.997375	99.9564
GOTERM_BP_FAT	GO:0009123~nucleoside monophosphate metabolic process	9	0.830258	0.554319	Q72H76_THET2, Q72IE8_THET2, Q72K86_THET2, PURL_THET2, Q72LJ5_THET2, GUAA_THET2, PURQ_THET2, Q72LC1_THET2, Q72LC2_THET2	582	24	1772	1.14175	1	0.999691	99.9994
GOTERM_BP_FAT	GO:0009124~nucleoside monophosphate biosynthetic process	9	0.830258	0.554319	Q72H76_THET2, Q72IE8_THET2, Q72K86_THET2, PURL_THET2, Q72LJ5_THET2, GUAA_THET2, PURQ_THET2, Q72LC1_THET2, Q72LC2_THET2	582	24	1772	1.14175	1	0.999691	99.9994
SP_PIR_KEYWORDS	Hydrogen ion transport	5	0.461255	0.555362	VATB_THET2, VATD_THET2, VATA_THET2, VATE_THET2, VATC_THET2	1084	15	4254	1.30812	1	0.909802	99.9957
GOTERM_MF_FAT	GO:0046933~hydrogen ion transporting ATP synthase activity, rotational mechanism	5	0.461255	0.562163	VATB_THET2, VATD_THET2, VATA_THET2, VATE_THET2, VATC_THET2	667	12	2095	1.30872	1	0.999929	99.9996
GOTERM_MF_FAT	GO:0022890~inorganic cation transmembrane transporter activity	14	1.29151	0.563968	Q72H24_THET2, Q745X6_THET2, VATB_THET2, VATA_THET2, VATE_THET2, Q72J68_THET2, Q72HW1_THET2, Q72KN7_THET2, Q72KV1_THET2, Q72HC7_THET2, VATC_THET2, VATD_THET2, Q72J67_THET2, Q72H23_THET2	667	41	2095	1.07251	1	0.999909	99.9996
GOTERM_BP_FAT	GO:0042777~plasma membrane ATP synthesis coupled proton transport	5	0.461255	0.591691	VATB_THET2, VATD_THET2, VATA_THET2, VATE_THET2, VATC_THET2	582	12	1772	1.26861	1	0.999754	99.9998
GOTERM_BP_FAT	GO:0046034~ATP metabolic process	9	0.830258	0.608587	VATB_THET2, VATD_THET2, VATA_THET2, VATE_THET2, Q72J68_THET2, Q72HW1_THET2, Q72KF9_THET2, Q72J67_THET2, VATC_THET2	582	25	1772	1.09608	1	0.999761	99.9999
GOTERM_BP_FAT	GO:0006754~ATP biosynthetic process	9	0.830258	0.608587	VATB_THET2, VATD_THET2, VATA_THET2, VATE_THET2, Q72J68_THET2, Q72HW1_THET2, Q72KF9_THET2, Q72J67_THET2, VATC_THET2	582	25	1772	1.09608	1	0.999761	99.9999
GOTERM_BP_FAT	GO:0009205~purine ribonucleoside triphosphate metabolic process	10	0.922509	0.648803	VATB_THET2, VATD_THET2, VATA_THET2, VATE_THET2, Q72J68_THET2, Q72HW1_THET2, Q72KF9_THET2, Q72J67_THET2, Q72LL5_THET2, VATC_THET2	582	29	1772	1.04989	1	0.999769	100
GOTERM_BP_FAT	GO:0009199~ribonucleoside triphosphate metabolic process	10	0.922509	0.648803	VATB_THET2, VATD_THET2, VATA_THET2, VATE_THET2, Q72J68_THET2, Q72HW1_THET2, Q72KF9_THET2, Q72J67_THET2, Q72LL5_THET2, VATC_THET2	582	29	1772	1.04989	1	0.999769	100
GOTERM_BP_FAT	GO:0009144~purine nucleoside triphosphate metabolic process	10	0.922509	0.648803	VATB_THET2, VATD_THET2, VATA_THET2, VATE_THET2, Q72J68_THET2, Q72HW1_THET2, Q72KF9_THET2, Q72J67_THET2, Q72LL5_THET2, VATC_THET2	582	29	1772	1.04989	1	0.999769	100
GOTERM_CC_FAT	GO:0033177~proton-transporting two-sector ATPase complex, proton-transporting domain	3	0.276753	0.656746	Q72J68_THET2, Q72J67_THET2, VATC_THET2	169	6	499	1.47633	1	0.993901	99.9979
GOTERM_BP_FAT	GO:0006189~'de novo' IMP biosynthetic process	5	0.461255	0.66311	Q72H76_THET2, PURL_THET2, PURQ_THET2, Q72LC1_THET2, Q72LC2_THET2	582	13	1772	1.17103	1	0.999749	100
GOTERM_MF_FAT	GO:0046961~proton-transporting ATPase activity, rotational mechanism	4	0.369004	0.664009	VATB_THET2, VATD_THET2, VATA_THET2, VATE_THET2	667	10	2095	1.25637	1	0.999986	100
GOTERM_MF_FAT	GO:0019829~cation-transporting ATPase activity	4	0.369004	0.664009	VATB_THET2, VATD_THET2, VATA_THET2, VATE_THET2	667	10	2095	1.25637	1	0.999986	100
GOTERM_MF_FAT	GO:0042623~ATPase activity, coupled	17	1.56827	0.684285	Q72G97_THET2, VATB_THET2, VATA_THET2, Q72J04_THET2, VATE_THET2, RECA_THET2, Q72J77_THET2, Q72HW1_THET2, Q72JY0_THET2, Q745W4_THET2, Q72KB4_THET2, Q72KH0_THET2, Q72J05_THET2, VATD_THET2, Q72IS0_THET2, CBID_THET2, Q72KF9_THET2, Q72J86_THET2	667	54	2095	0.988811	1	0.999988	100
GOTERM_BP_FAT	GO:0015992~proton transport	7	0.645756	0.685795	VATB_THET2, VATD_THET2, VATA_THET2, VATE_THET2, Q72J68_THET2, Q72J67_THET2, VATC_THET2	582	20	1772	1.06564	1	0.999758	100
GOTERM_BP_FAT	GO:0006818~hydrogen transport	7	0.645756	0.685795	VATB_THET2, VATD_THET2, VATA_THET2, VATE_THET2, Q72J68_THET2, Q72J67_THET2, VATC_THET2	582	20	1772	1.06564	1	0.999758	100
SP_PIR_KEYWORDS	ion transport	6	0.553506	0.694558	Q72JG2_THET2, VATB_THET2, VATD_THET2, VATA_THET2, Q72G87_THET2, Q72G86_THET2, VATE_THET2, VATC_THET2	1084	22	4254	1.07028	1	0.950065	100
GOTERM_BP_FAT	GO:0009206~purine ribonucleoside triphosphate biosynthetic process	9	0.830258	0.705804	VATB_THET2, VATD_THET2, VATA_THET2, VATE_THET2, Q72J68_THET2, Q72HW1_THET2, Q72KF9_THET2, Q72J67_THET2, VATC_THET2	582	27	1772	1.01489	1	0.999759	100
GOTERM_BP_FAT	GO:0009201~ribonucleoside triphosphate biosynthetic process	9	0.830258	0.705804	VATB_THET2, VATD_THET2, VATA_THET2, VATE_THET2, Q72J68_THET2, Q72HW1_THET2, Q72KF9_THET2, Q72J67_THET2, VATC_THET2	582	27	1772	1.01489	1	0.999759	100
GOTERM_BP_FAT	GO:0009145~purine nucleoside triphosphate biosynthetic process	9	0.830258	0.705804	VATB_THET2, VATD_THET2, VATA_THET2, VATE_THET2, Q72J68_THET2, Q72HW1_THET2, Q72KF9_THET2, Q72J67_THET2, VATC_THET2	582	27	1772	1.01489	1	0.999759	100
GOTERM_MF_FAT	GO:0042626~ATPase activity, coupled to transmembrane movement of substances	10	0.922509	0.734069	Q72J05_THET2, VATB_THET2, VATD_THET2, VATA_THET2, CBID_THET2, Q72J04_THET2, VATE_THET2, Q72HW1_THET2, Q72KF9_THET2, Q72KH0_THET2	667	32	2095	0.98154	1	0.999993	100
GOTERM_MF_FAT	GO:0043492~ATPase activity, coupled to movement of substances	10	0.922509	0.734069	Q72J05_THET2, VATB_THET2, VATD_THET2, VATA_THET2, CBID_THET2, Q72J04_THET2, VATE_THET2, Q72HW1_THET2, Q72KF9_THET2, Q72KH0_THET2	667	32	2095	0.98154	1	0.999993	100
GOTERM_BP_FAT	GO:0006812~cation transport	25	2.30627	0.744697	Q72G86_THET2, Q72J68_THET2, Q72HW1_THET2, Q72KN7_THET2, Q72L36_THET2, Q72JG2_THET2, Q72KF9_THET2, Q72JS3_THET2, Q745X6_THET2, VATB_THET2, VATA_THET2, Q72G87_THET2, VATE_THET2, Q72HB7_THET2, Q72JG3_THET2, Q72L34_THET2, Q746P5_THET2, Q72HZ0_THET2, Q72KV1_THET2, Q72IM4_THET2, Q72HZ3_THET2, VATC_THET2, Q72K84_THET2, VATD_THET2, Q72JU0_THET2, Q72IL9_THET2, Q72J67_THET2	582	80	1772	0.95146	1	0.99984	100
GOTERM_MF_FAT	GO:0042625~ATPase activity, coupled to transmembrane movement of ions	7	0.645756	0.748851	VATB_THET2, VATD_THET2, VATA_THET2, VATE_THET2, Q72HW1_THET2, Q72KF9_THET2, Q72KH0_THET2	667	22	2095	0.999387	1	0.999994	100
GOTERM_BP_FAT	GO:0009141~nucleoside triphosphate metabolic process	10	0.922509	0.772439	VATB_THET2, VATD_THET2, VATA_THET2, VATE_THET2, Q72J68_THET2, Q72HW1_THET2, Q72KF9_THET2, Q72J67_THET2, Q72LL5_THET2, VATC_THET2	582	32	1772	0.95146	1	0.999899	100
GOTERM_CC_FAT	GO:0033178~proton-transporting two-sector ATPase complex, catalytic domain	4	0.369004	0.775897	VATB_THET2, VATD_THET2, VATA_THET2, VATE_THET2	169	11	499	1.0737	1	0.995724	100
GOTERM_BP_FAT	GO:0015672~monovalent inorganic cation transport	11	1.01476	0.793691	VATB_THET2, VATA_THET2, Q72G87_THET2, Q72G86_THET2, Q72J68_THET2, VATE_THET2, Q72L34_THET2, VATC_THET2, Q72HZ3_THET2, VATD_THET2, Q72JG2_THET2, Q72IL9_THET2, Q72J67_THET2	582	36	1772	0.930317	1	0.999906	100
GOTERM_BP_FAT	GO:0009142~nucleoside triphosphate biosynthetic process	9	0.830258	0.81927	VATB_THET2, VATD_THET2, VATA_THET2, VATE_THET2, Q72J68_THET2, Q72HW1_THET2, Q72KF9_THET2, Q72J67_THET2, VATC_THET2	582	30	1772	0.913402	1	0.999927	100
GOTERM_BP_FAT	GO:0030001~metal ion transport	13	1.19926	0.89297	Q745X6_THET2, Q72G87_THET2, Q72G86_THET2, Q72HB7_THET2, Q72HW1_THET2, Q72L34_THET2, Q72KN7_THET2, Q746P5_THET2, Q72HZ0_THET2, Q72KV1_THET2, Q72L36_THET2, Q72HZ3_THET2, Q72JG2_THET2, Q72IL9_THET2, Q72KF9_THET2	582	47	1772	0.842144	1	0.999983	100
GOTERM_MF_FAT	GO:0016820~hydrolase activity, acting on acid anhydrides, catalyzing transmembrane movement of substances	12	1.10701	0.909478	Q72L52_THET2, Q72J05_THET2, VATB_THET2, VATD_THET2, VATA_THET2, CBID_THET2, Q72J04_THET2, VATE_THET2, Q72HW1_THET2, Q72KF9_THET2, Q72I66_THET2, Q72KH0_THET2	667	46	2095	0.819373	1	1	100
GOTERM_BP_FAT	GO:0006811~ion transport	30	2.76753	0.920801	Q72G86_THET2, Q72J68_THET2, Q72KN7_THET2, Q72HW1_THET2, Q72L36_THET2, Q72KH0_THET2, Q72JG2_THET2, Q72KF9_THET2, Q72JS3_THET2, Q72HN9_THET2, Q72KH1_THET2, VATB_THET2, Q745X6_THET2, VATA_THET2, Q72G87_THET2, VATE_THET2, Q72JG3_THET2, Q72HB7_THET2, Q72L34_THET2, Q746P5_THET2, Q72HZ0_THET2, Q72KV1_THET2, Q72IM4_THET2, VATC_THET2, Q72HZ3_THET2, VATD_THET2, Q72K84_THET2, Q72JU0_THET2, Q72GX4_THET2, Q72…	582	107	1772	0.853647	1	0.999993	100
Annotation Cluster 49	Enrichment Score: 0.28319699662221837
Category	Term	Count	%	PValue	Genes	List Total	Pop Hits	Pop Total	Fold Enrichment	Bonferroni	Benjamini	FDR
INTERPRO	IPR012285:Fumarate reductase, C-terminal	4	0.369004	0.299102	Q72IY0_THET2, Q72IP3_THET2, Q72LD2_THET2, Q72JM0_THET2	965	7	3493	2.06839	1	1	99.7435
INTERPRO	IPR017900:4Fe-4S ferredoxin, iron-sulphur binding, conserved site	6	0.553506	0.464274	Q72IY0_THET2, Q72IP3_THET2, Q72LD2_THET2, Q72GN9_THET2, Q72JM0_THET2, Q72LE7_THET2	965	16	3493	1.35738	1	1	99.9972
INTERPRO	IPR017896:4Fe-4S ferredoxin, iron-sulpur binding domain	6	0.553506	0.582274	Q72IY0_THET2, Q72IP3_THET2, Q72LD2_THET2, Q72GN9_THET2, Q72JM0_THET2, Q72LE7_THET2	965	18	3493	1.20656	1	1	100
INTERPRO	IPR001450:4Fe-4S ferredoxin, iron-sulphur binding, subgroup	3	0.276753	0.910943	Q72LD2_THET2, Q72GN9_THET2, Q72LE7_THET2	965	13	3493	0.835313	1	1	100
Annotation Cluster 50	Enrichment Score: 0.2770144732931512
Category	Term	Count	%	PValue	Genes	List Total	Pop Hits	Pop Total	Fold Enrichment	Bonferroni	Benjamini	FDR
SP_PIR_KEYWORDS	dna repair	10	0.922509	0.430103	FPG_THET2, Q72L87_THET2, Q72I50_THET2, MUTL_THET2, RECA_THET2, RUVA_THET2, Q72IQ7_THET2, RUVC_THET2, NFI_THET2, Q72GX7_THET2	1084	32	4254	1.22636	1	0.841933	99.9061
SP_PIR_KEYWORDS	DNA damage	10	0.922509	0.430103	FPG_THET2, Q72L87_THET2, Q72I50_THET2, MUTL_THET2, RECA_THET2, RUVA_THET2, Q72IQ7_THET2, RUVC_THET2, NFI_THET2, Q72GX7_THET2	1084	32	4254	1.22636	1	0.841933	99.9061
SP_PIR_KEYWORDS	sos response	4	0.369004	0.488233	RECA_THET2, RUVA_THET2, Q72IQ7_THET2, Q72GX7_THET2	1084	10	4254	1.56974	1	0.876042	99.9752
GOTERM_BP_FAT	GO:0031668~cellular response to extracellular stimulus	5	0.461255	0.591691	Q72H92_THET2, RECA_THET2, RUVA_THET2, Q72IQ7_THET2, Q72GX7_THET2	582	12	1772	1.26861	1	0.999754	99.9998
GOTERM_BP_FAT	GO:0009991~response to extracellular stimulus	5	0.461255	0.591691	Q72H92_THET2, RECA_THET2, RUVA_THET2, Q72IQ7_THET2, Q72GX7_THET2	582	12	1772	1.26861	1	0.999754	99.9998
GOTERM_BP_FAT	GO:0009432~SOS response	4	0.369004	0.688577	RECA_THET2, RUVA_THET2, Q72IQ7_THET2, Q72GX7_THET2	582	10	1772	1.21787	1	0.999727	100
Annotation Cluster 51	Enrichment Score: 0.2754860828008178
Category	Term	Count	%	PValue	Genes	List Total	Pop Hits	Pop Total	Fold Enrichment	Bonferroni	Benjamini	FDR
INTERPRO	IPR013817:Pre-ATP-grasp fold	4	0.369004	0.471896	CARB_THET2, Q72JL4_THET2, DDL_THET2, Q72LC2_THET2	965	9	3493	1.60875	1	1	99.9978
INTERPRO	IPR011761:ATP-grasp fold	5	0.461255	0.502464	Q72HE6_THET2, CARB_THET2, Q72JL4_THET2, DDL_THET2, Q72LC2_THET2	965	13	3493	1.39219	1	1	99.9992
INTERPRO	IPR013816:ATP-grasp fold, subdomain 2	5	0.461255	0.628913	CARB_THET2, Q72II1_THET2, Q72JL4_THET2, DDL_THET2, Q72LC2_THET2	965	15	3493	1.20656	1	1	100
Annotation Cluster 52	Enrichment Score: 0.27467521156983693
Category	Term	Count	%	PValue	Genes	List Total	Pop Hits	Pop Total	Fold Enrichment	Bonferroni	Benjamini	FDR
GOTERM_BP_FAT	GO:0006119~oxidative phosphorylation	12	1.10701	0.339651	Q72H24_THET2, Q72GE0_THET2, VATB_THET2, VATD_THET2, VATA_THET2, Q72GD4_THET2, Q72GE1_THET2, Q72GD9_THET2, VATE_THET2, Q72J68_THET2, Q72J67_THET2, VATC_THET2	582	29	1772	1.25986	1	0.99999	99.7936
GOTERM_BP_FAT	GO:0006796~phosphate metabolic process	29	2.67528	0.529961	UPPP_THET2, KHSE_THET2, Q72H95_THET2, Q72J68_THET2, Q72HI5_THET2, Q72IA2_THET2, Q72IA4_THET2, Q72JF5_THET2, Q72IY3_THET2, Q72GE0_THET2, Q72LA1_THET2, Q72GJ2_THET2, Q72GJ8_THET2, Q72IJ3_THET2, Q72GJ9_THET2, Q72JJ4_THET2, Q72H24_THET2, VATB_THET2, VATA_THET2, Q72GE1_THET2, VATE_THET2, VATC_THET2, VATD_THET2, Q72GD4_THET2, GPDA_THET2, Q72GD9_THET2, ISPE_THET2, Q72JF6_THET2, Q72KV3_THET2, Q72J67_THET2	582	85	1772	1.03877	1	0.999637	99.9987
GOTERM_BP_FAT	GO:0006793~phosphorus metabolic process	29	2.67528	0.529961	UPPP_THET2, KHSE_THET2, Q72H95_THET2, Q72J68_THET2, Q72HI5_THET2, Q72IA2_THET2, Q72IA4_THET2, Q72JF5_THET2, Q72IY3_THET2, Q72GE0_THET2, Q72LA1_THET2, Q72GJ2_THET2, Q72GJ8_THET2, Q72IJ3_THET2, Q72GJ9_THET2, Q72JJ4_THET2, Q72H24_THET2, VATB_THET2, VATA_THET2, Q72GE1_THET2, VATE_THET2, VATC_THET2, VATD_THET2, Q72GD4_THET2, GPDA_THET2, Q72GD9_THET2, ISPE_THET2, Q72JF6_THET2, Q72KV3_THET2, Q72J67_THET2	582	85	1772	1.03877	1	0.999637	99.9987
GOTERM_BP_FAT	GO:0016310~phosphorylation	24	2.21402	0.574432	Q72H24_THET2, VATB_THET2, KHSE_THET2, VATA_THET2, Q72GE1_THET2, Q72J68_THET2, VATE_THET2, Q72IA2_THET2, Q72IA4_THET2, Q72JF5_THET2, Q72IY3_THET2, VATC_THET2, Q72GE0_THET2, Q72LA1_THET2, VATD_THET2, Q72GD4_THET2, Q72GD9_THET2, Q72GJ2_THET2, ISPE_THET2, Q72KV3_THET2, Q72GJ8_THET2, Q72J67_THET2, Q72IJ3_THET2, Q72GJ9_THET2, Q72JJ4_THET2	582	71	1772	1.02919	1	0.999714	99.9997
GOTERM_BP_FAT	GO:0006468~protein amino acid phosphorylation	10	0.922509	0.772439	Q72LA1_THET2, Q72GJ2_THET2, Q72KV3_THET2, Q72IA2_THET2, Q72GJ8_THET2, Q72IA4_THET2, Q72IJ3_THET2, Q72JF5_THET2, Q72GJ9_THET2, Q72IY3_THET2, Q72JJ4_THET2	582	32	1772	0.95146	1	0.999899	100
Annotation Cluster 53	Enrichment Score: 0.27441560547101335
Category	Term	Count	%	PValue	Genes	List Total	Pop Hits	Pop Total	Fold Enrichment	Bonferroni	Benjamini	FDR
GOTERM_BP_FAT	GO:0042278~purine nucleoside metabolic process	7	0.645756	0.363798	COAX_THET2, MTNA_THET2, COAE_THET2, TGT_THET2, Q72HX7_THET2, Q72ID7_THET2, QUEA_THET2	582	15	1772	1.42085	1	0.999968	99.8815
GOTERM_BP_FAT	GO:0046128~purine ribonucleoside metabolic process	7	0.645756	0.363798	COAX_THET2, MTNA_THET2, COAE_THET2, TGT_THET2, Q72HX7_THET2, Q72ID7_THET2, QUEA_THET2	582	15	1772	1.42085	1	0.999968	99.8815
GOTERM_BP_FAT	GO:0008617~guanosine metabolic process	3	0.276753	0.397702	TGT_THET2, Q72HX7_THET2, QUEA_THET2	582	4	1772	2.28351	1	0.999928	99.9476
GOTERM_BP_FAT	GO:0009116~nucleoside metabolic process	18	1.66052	0.596835	PYRE_THET2, COAX_THET2, Q72IR2_THET2, Q72IE8_THET2, Q72IN4_THET2, COAE_THET2, TGT_THET2, Q72I58_THET2, Q72ID7_THET2, Q72IH6_THET2, QUEA_THET2, MTNA_THET2, UPP_THET2, Q72I82_THET2, Q72HS4_THET2, Q72L73_THET2, Q72I83_THET2, Q72HX7_THET2	582	53	1772	1.03404	1	0.999722	99.9999
GOTERM_BP_FAT	GO:0033865~nucleoside bisphosphate metabolic process	4	0.369004	0.609744	COAX_THET2, COAE_THET2, Q72HX7_THET2, Q72ID7_THET2	582	9	1772	1.35319	1	0.999739	99.9999
GOTERM_BP_FAT	GO:0009119~ribonucleoside metabolic process	7	0.645756	0.630047	COAX_THET2, MTNA_THET2, COAE_THET2, TGT_THET2, Q72HX7_THET2, Q72ID7_THET2, QUEA_THET2	582	19	1772	1.12172	1	0.999743	100
GOTERM_BP_FAT	GO:0015936~coenzyme A metabolic process	3	0.276753	0.726961	COAX_THET2, COAE_THET2, Q72ID7_THET2	582	7	1772	1.30486	1	0.999809	100
GOTERM_BP_FAT	GO:0015937~coenzyme A biosynthetic process	3	0.276753	0.726961	COAX_THET2, COAE_THET2, Q72ID7_THET2	582	7	1772	1.30486	1	0.999809	100
Annotation Cluster 54	Enrichment Score: 0.2719612372810344
Category	Term	Count	%	PValue	Genes	List Total	Pop Hits	Pop Total	Fold Enrichment	Bonferroni	Benjamini	FDR
INTERPRO	IPR000573:Aconitase A/isopropylmalate dehydratase small subunit, swivel	3	0.276753	0.526634	LEUD_THET2, HACB_THET2, Q72KN3_THET2	965	6	3493	1.80984	1	1	99.9996
INTERPRO	IPR015928:Aconitase/3-isopropylmalate dehydratase, swivel	3	0.276753	0.526634	LEUD_THET2, HACB_THET2, Q72KN3_THET2	965	6	3493	1.80984	1	1	99.9996
INTERPRO	IPR015937:Aconitase-like core	4	0.369004	0.550932	LEUD_THET2, HACB_THET2, LEUC_THET2, Q72KN3_THET2	965	10	3493	1.44788	1	1	99.9999
Annotation Cluster 55	Enrichment Score: 0.26017598664279085
Category	Term	Count	%	PValue	Genes	List Total	Pop Hits	Pop Total	Fold Enrichment	Bonferroni	Benjamini	FDR
GOTERM_BP_FAT	GO:0008654~phospholipid biosynthetic process	6	0.553506	0.507137	GPDA_THET2, PLSX_THET2, ISPH_THET2, Q72JT6_THET2, Q72LG9_THET2, FABZ_THET2	582	14	1772	1.30486	1	0.999645	99.9974
GOTERM_BP_FAT	GO:0006644~phospholipid metabolic process	6	0.553506	0.507137	GPDA_THET2, PLSX_THET2, ISPH_THET2, Q72JT6_THET2, Q72LG9_THET2, FABZ_THET2	582	14	1772	1.30486	1	0.999645	99.9974
GOTERM_BP_FAT	GO:0019637~organophosphate metabolic process	6	0.553506	0.644498	GPDA_THET2, PLSX_THET2, ISPH_THET2, Q72JT6_THET2, Q72LG9_THET2, FABZ_THET2	582	16	1772	1.14175	1	0.99977	100
Annotation Cluster 56	Enrichment Score: 0.25253457183690964
Category	Term	Count	%	PValue	Genes	List Total	Pop Hits	Pop Total	Fold Enrichment	Bonferroni	Benjamini	FDR
GOTERM_BP_FAT	GO:0032984~macromolecular complex disassembly	6	0.553506	0.352621	NUSB_THET2, Q72KG4_THET2, Q72GJ6_THET2, RF1_THET2, RRF_THET2, Q72GW1_THET2	582	12	1772	1.52234	1	0.999978	99.8464
GOTERM_BP_FAT	GO:0043241~protein complex disassembly	6	0.553506	0.352621	NUSB_THET2, Q72KG4_THET2, Q72GJ6_THET2, RF1_THET2, RRF_THET2, Q72GW1_THET2	582	12	1772	1.52234	1	0.999978	99.8464
GOTERM_BP_FAT	GO:0034623~cellular macromolecular complex disassembly	6	0.553506	0.352621	NUSB_THET2, Q72KG4_THET2, Q72GJ6_THET2, RF1_THET2, RRF_THET2, Q72GW1_THET2	582	12	1772	1.52234	1	0.999978	99.8464
GOTERM_BP_FAT	GO:0043624~cellular protein complex disassembly	6	0.553506	0.352621	NUSB_THET2, Q72KG4_THET2, Q72GJ6_THET2, RF1_THET2, RRF_THET2, Q72GW1_THET2	582	12	1772	1.52234	1	0.999978	99.8464
GOTERM_BP_FAT	GO:0022411~cellular component disassembly	6	0.553506	0.352621	NUSB_THET2, Q72KG4_THET2, Q72GJ6_THET2, RF1_THET2, RRF_THET2, Q72GW1_THET2	582	12	1772	1.52234	1	0.999978	99.8464
GOTERM_BP_FAT	GO:0034621~cellular macromolecular complex subunit organization	12	1.10701	0.389678	Q72JP4_THET2, NUSB_THET2, Q72IU4_THET2, Q72KG4_THET2, RL20_THET2, Q72GJ6_THET2, RF1_THET2, RRF_THET2, CCME_THET2, Q72IJ1_THET2, Q72IU0_THET2, Q72GW1_THET2	582	30	1772	1.21787	1	0.999949	99.9362
GOTERM_BP_FAT	GO:0006415~translational termination	3	0.276753	0.397702	Q72GJ6_THET2, RF1_THET2, RRF_THET2	582	4	1772	2.28351	1	0.999928	99.9476
GOTERM_BP_FAT	GO:0043933~macromolecular complex subunit organization	13	1.19926	0.535385	NUSB_THET2, Q72KG4_THET2, Q72GJ6_THET2, Q72IJ1_THET2, COXX_THET2, Q72JP4_THET2, Q72IU4_THET2, RL20_THET2, RF1_THET2, CCME_THET2, RRF_THET2, Q72IU0_THET2, Q72GW1_THET2	582	36	1772	1.09947	1	0.999634	99.9989
SP_PIR_KEYWORDS	transcription termination	3	0.276753	0.566558	NUSB_THET2, Q72KG4_THET2, Q72GW1_THET2	1084	7	4254	1.68187	1	0.913072	99.9968
GOTERM_BP_FAT	GO:0034622~cellular macromolecular complex assembly	6	0.553506	0.755063	Q72JP4_THET2, Q72IU4_THET2, RL20_THET2, CCME_THET2, Q72IJ1_THET2, Q72IU0_THET2	582	18	1772	1.01489	1	0.999853	100
GOTERM_BP_FAT	GO:0006353~transcription termination	3	0.276753	0.796441	NUSB_THET2, Q72KG4_THET2, Q72GW1_THET2	582	8	1772	1.14175	1	0.999905	100
GOTERM_BP_FAT	GO:0065003~macromolecular complex assembly	7	0.645756	0.850803	COXX_THET2, Q72JP4_THET2, Q72IU4_THET2, RL20_THET2, CCME_THET2, Q72IJ1_THET2, Q72IU0_THET2	582	24	1772	0.88803	1	0.999957	100
GOTERM_BP_FAT	GO:0043623~cellular protein complex assembly	5	0.461255	0.860628	Q72JP4_THET2, Q72IU4_THET2, CCME_THET2, Q72IJ1_THET2, Q72IU0_THET2	582	17	1772	0.895492	1	0.999965	100
GOTERM_BP_FAT	GO:0070271~protein complex biogenesis	6	0.553506	0.917609	COXX_THET2, Q72JP4_THET2, Q72IU4_THET2, CCME_THET2, Q72IJ1_THET2, Q72IU0_THET2	582	23	1772	0.794263	1	0.999993	100
GOTERM_BP_FAT	GO:0006461~protein complex assembly	6	0.553506	0.917609	COXX_THET2, Q72JP4_THET2, Q72IU4_THET2, CCME_THET2, Q72IJ1_THET2, Q72IU0_THET2	582	23	1772	0.794263	1	0.999993	100
GOTERM_BP_FAT	GO:0017004~cytochrome complex assembly	3	0.276753	0.958596	Q72IU4_THET2, CCME_THET2, Q72IU0_THET2	582	13	1772	0.702617	1	0.999999	100
Annotation Cluster 57	Enrichment Score: 0.2524544641253071
Category	Term	Count	%	PValue	Genes	List Total	Pop Hits	Pop Total	Fold Enrichment	Bonferroni	Benjamini	FDR
GOTERM_CC_FAT	GO:0030312~external encapsulating structure	15	1.38376	0.535373	Q72JA6_THET2, Q72IW4_THET2, Q72J15_THET2, Q72KH0_THET2, DDL_THET2, Q72JG5_THET2, Q72GQ8_THET2, Q72GX4_THET2, Q72KF0_THET2, Q72K21_THET2, Q72JA2_THET2, Q72JF3_THET2, MURG_THET2, Q72HN0_THET2, Q72L19_THET2	169	41	499	1.08024	1	0.998874	99.9563
GOTERM_CC_FAT	GO:0005618~cell wall	6	0.553506	0.536436	Q72GX4_THET2, Q72KF0_THET2, Q72JA2_THET2, Q72JF3_THET2, MURG_THET2, DDL_THET2	169	14	499	1.26543	1	0.99499	99.9573
GOTERM_CC_FAT	GO:0009274~peptidoglycan-based cell wall	5	0.461255	0.538035	Q72GX4_THET2, Q72KF0_THET2, Q72JA2_THET2, Q72JF3_THET2, MURG_THET2	169	11	499	1.34212	1	0.991671	99.9588
GOTERM_CC_FAT	GO:0009276~Gram-negative-bacterium-type cell wall	4	0.369004	0.632699	Q72GX4_THET2, Q72KF0_THET2, Q72JA2_THET2, MURG_THET2	169	9	499	1.31229	1	0.994343	99.9959
Annotation Cluster 58	Enrichment Score: 0.24694702593931156
Category	Term	Count	%	PValue	Genes	List Total	Pop Hits	Pop Total	Fold Enrichment	Bonferroni	Benjamini	FDR
SP_PIR_KEYWORDS	proline biosynthesis	3	0.276753	0.376861	P5CR_THET2, PROB_THET2, PROA_THET2	1084	5	4254	2.35461	1	0.805618	99.7158
GOTERM_BP_FAT	GO:0009084~glutamine family amino acid biosynthetic process	11	1.01476	0.593002	P5CR_THET2, Q72IB9_THET2, CARB_THET2, OTC_THET2, ARGJ_THET2, ARGR_THET2, ARGC_THET2, CARA_THET2, Q72IM8_THET2, PROB_THET2, PROA_THET2	582	31	1772	1.08037	1	0.99973	99.9998
GOTERM_BP_FAT	GO:0006561~proline biosynthetic process	4	0.369004	0.609744	P5CR_THET2, Q72IB9_THET2, PROB_THET2, PROA_THET2	582	9	1772	1.35319	1	0.999739	99.9999
GOTERM_BP_FAT	GO:0006560~proline metabolic process	4	0.369004	0.754793	P5CR_THET2, Q72IB9_THET2, PROB_THET2, PROA_THET2	582	11	1772	1.10715	1	0.999865	100
Annotation Cluster 59	Enrichment Score: 0.24532200131930934
Category	Term	Count	%	PValue	Genes	List Total	Pop Hits	Pop Total	Fold Enrichment	Bonferroni	Benjamini	FDR
KEGG_PATHWAY	tth00400:Phenylalanine, tyrosine and tryptophan biosynthesis	12	1.10701	0.0976225	Q72G88_THET2, AROA_THET2, Q72IW1_THET2, Q72GB9_THET2, Q72LJ9_THET2, TRPA_THET2, AROC_THET2, AROE_THET2, AROK_THET2, Q72KK0_THET2, Q72KC8_THET2, Q72HJ4_THET2	454	21	1244	1.56576	0.999998	0.435419	69.6674
SP_PIR_KEYWORDS	aromatic amino acid biosynthesis	6	0.553506	0.603925	AROA_THET2, Q72GB9_THET2, TRPA_THET2, AROC_THET2, AROE_THET2, AROK_THET2	1084	20	4254	1.17731	1	0.930363	99.999
GOTERM_BP_FAT	GO:0043648~dicarboxylic acid metabolic process	12	1.10701	0.713346	MDH_THET2, AROA_THET2, Q72IW1_THET2, Q72GB9_THET2, AK_THET2, TRPA_THET2, AROC_THET2, AROE_THET2, Q72LB5_THET2, AROK_THET2, Q72KK0_THET2, Q72HJ4_THET2	582	37	1772	0.987462	1	0.999779	100
GOTERM_BP_FAT	GO:0046417~chorismate metabolic process	9	0.830258	0.785824	AROA_THET2, Q72IW1_THET2, Q72GB9_THET2, TRPA_THET2, AROC_THET2, AROE_THET2, AROK_THET2, Q72KK0_THET2, Q72HJ4_THET2	582	29	1772	0.944899	1	0.999901	100
GOTERM_BP_FAT	GO:0009072~aromatic amino acid family metabolic process	9	0.830258	0.785824	AROA_THET2, Q72IW1_THET2, Q72GB9_THET2, TRPA_THET2, AROC_THET2, AROE_THET2, AROK_THET2, Q72KK0_THET2, Q72HJ4_THET2	582	29	1772	0.944899	1	0.999901	100
GOTERM_BP_FAT	GO:0009073~aromatic amino acid family biosynthetic process	9	0.830258	0.785824	AROA_THET2, Q72IW1_THET2, Q72GB9_THET2, TRPA_THET2, AROC_THET2, AROE_THET2, AROK_THET2, Q72KK0_THET2, Q72HJ4_THET2	582	29	1772	0.944899	1	0.999901	100
GOTERM_BP_FAT	GO:0019438~aromatic compound biosynthetic process	16	1.47601	0.939588	Q72IW1_THET2, AROA_THET2, AROC_THET2, TRPA_THET2, Q72LK3_THET2, THIE_THET2, AROE_THET2, AROK_THET2, Q72KK0_THET2, Q72HL9_THET2, Q72GF4_THET2, Q72GB9_THET2, THII_THET2, Q72HN5_THET2, DXS_THET2, Q72HJ4_THET2	582	61	1772	0.798603	1	0.999997	100
Annotation Cluster 60	Enrichment Score: 0.2438126994917911
Category	Term	Count	%	PValue	Genes	List Total	Pop Hits	Pop Total	Fold Enrichment	Bonferroni	Benjamini	FDR
SP_PIR_KEYWORDS	arginine biosynthesis	6	0.553506	0.328571	CARB_THET2, OTC_THET2, ARGJ_THET2, ARGR_THET2, ARGC_THET2, CARA_THET2	1084	15	4254	1.56974	1	0.788154	99.283
GOTERM_BP_FAT	GO:0009084~glutamine family amino acid biosynthetic process	11	1.01476	0.593002	P5CR_THET2, Q72IB9_THET2, CARB_THET2, OTC_THET2, ARGJ_THET2, ARGR_THET2, ARGC_THET2, CARA_THET2, Q72IM8_THET2, PROB_THET2, PROA_THET2	582	31	1772	1.08037	1	0.99973	99.9998
GOTERM_BP_FAT	GO:0006525~arginine metabolic process	8	0.738007	0.719582	CARB_THET2, OTC_THET2, ARGJ_THET2, ARGR_THET2, ARGC_THET2, CARA_THET2, Q72I55_THET2, Q72K94_THET2	582	24	1772	1.01489	1	0.999792	100
GOTERM_BP_FAT	GO:0006526~arginine biosynthetic process	6	0.553506	0.755063	CARB_THET2, OTC_THET2, ARGJ_THET2, ARGR_THET2, ARGC_THET2, CARA_THET2	582	18	1772	1.01489	1	0.999853	100
Annotation Cluster 61	Enrichment Score: 0.23829337496583808
Category	Term	Count	%	PValue	Genes	List Total	Pop Hits	Pop Total	Fold Enrichment	Bonferroni	Benjamini	FDR
GOTERM_MF_FAT	GO:0016868~intramolecular transferase activity, phosphotransferases	6	0.553506	0.400087	GLMM_THET2, Q72H36_THET2, Q72H65_THET2, Q72H77_THET2, APGM_THET2, Q72K80_THET2	667	13	2095	1.44966	1	0.999725	99.9554
INTERPRO	IPR005846:Alpha-D-phosphohexomutase, alpha/beta/alpha domain III	3	0.276753	0.526634	GLMM_THET2, Q72H65_THET2, Q72K80_THET2	965	6	3493	1.80984	1	1	99.9996
INTERPRO	IPR005843:Alpha-D-phosphohexomutase, C-terminal	3	0.276753	0.526634	GLMM_THET2, Q72H65_THET2, Q72K80_THET2	965	6	3493	1.80984	1	1	99.9996
INTERPRO	IPR005845:Alpha-D-phosphohexomutase, alpha/beta/alpha domain II	3	0.276753	0.694527	GLMM_THET2, Q72H65_THET2, Q72K80_THET2	965	8	3493	1.35738	1	1	100
INTERPRO	IPR005844:Alpha-D-phosphohexomutase, alpha/beta/alpha domain I	3	0.276753	0.694527	GLMM_THET2, Q72H65_THET2, Q72K80_THET2	965	8	3493	1.35738	1	1	100
INTERPRO	IPR016055:Alpha-D-phosphohexomutase, alpha/beta/alpha I, II and III	3	0.276753	0.694527	GLMM_THET2, Q72H65_THET2, Q72K80_THET2	965	8	3493	1.35738	1	1	100
Annotation Cluster 62	Enrichment Score: 0.2369118648628672
Category	Term	Count	%	PValue	Genes	List Total	Pop Hits	Pop Total	Fold Enrichment	Bonferroni	Benjamini	FDR
SMART	SM00387:HATPase_c	9	0.830258	0.344056	Q72LA1_THET2, MUTL_THET2, Q72KV3_THET2, Q72GJ8_THET2, Q72IA4_THET2, Q72IJ3_THET2, Q72JF5_THET2, Q72GJ9_THET2, Q72IY3_THET2, Q72JJ4_THET2	143	26	552	1.3362	1	0.99998	98.8309
SP_PIR_KEYWORDS	phosphoprotein	13	1.19926	0.37703	LDH_THET2, GLMM_THET2, Q72L91_THET2, Q72HW1_THET2, Q72IA4_THET2, Q72IY3_THET2, ENO_THET2, Q72KV3_THET2, Q72KF9_THET2, Q72GJ8_THET2, Q72IJ3_THET2, DNAK_THET2, Q72GJ9_THET2, Q72JJ4_THET2	1084	42	4254	1.21468	1	0.799927	99.7167
INTERPRO	IPR005467:Signal transduction histidine kinase, core	8	0.738007	0.405704	Q72LA1_THET2, Q72KV3_THET2, Q72GJ8_THET2, Q72IA4_THET2, Q72IJ3_THET2, Q72JF5_THET2, Q72GJ9_THET2, Q72IY3_THET2, Q72JJ4_THET2	965	22	3493	1.31625	1	1	99.9839
INTERPRO	IPR003594:ATP-binding region, ATPase-like	9	0.830258	0.43066	Q72LA1_THET2, MUTL_THET2, Q72KV3_THET2, Q72GJ8_THET2, Q72IA4_THET2, Q72IJ3_THET2, Q72JF5_THET2, Q72GJ9_THET2, Q72IY3_THET2, Q72JJ4_THET2	965	26	3493	1.25297	1	1	99.9922
GOTERM_MF_FAT	GO:0000155~two-component sensor activity	9	0.830258	0.455599	Q72LA1_THET2, Q72JY9_THET2, Q72KV3_THET2, Q72GJ8_THET2, Q72IA4_THET2, Q72IJ3_THET2, Q72JF5_THET2, Q72GJ9_THET2, Q72IY3_THET2, Q72JJ4_THET2	667	23	2095	1.22906	1	0.999892	99.9897
GOTERM_MF_FAT	GO:0004673~protein histidine kinase activity	9	0.830258	0.455599	Q72LA1_THET2, Q72JY9_THET2, Q72KV3_THET2, Q72GJ8_THET2, Q72IA4_THET2, Q72IJ3_THET2, Q72JF5_THET2, Q72GJ9_THET2, Q72IY3_THET2, Q72JJ4_THET2	667	23	2095	1.22906	1	0.999892	99.9897
GOTERM_MF_FAT	GO:0016775~phosphotransferase activity, nitrogenous group as acceptor	9	0.830258	0.455599	Q72LA1_THET2, Q72JY9_THET2, Q72KV3_THET2, Q72GJ8_THET2, Q72IA4_THET2, Q72IJ3_THET2, Q72JF5_THET2, Q72GJ9_THET2, Q72IY3_THET2, Q72JJ4_THET2	667	23	2095	1.22906	1	0.999892	99.9897
SMART	SM00388:HisKA	6	0.553506	0.511331	Q72KV3_THET2, Q72GJ8_THET2, Q72IA4_THET2, Q72IJ3_THET2, Q72GJ9_THET2, Q72IY3_THET2, Q72JJ4_THET2	143	18	552	1.28671	1	0.998984	99.9476
SMART	SM00091:PAS	3	0.276753	0.574143	Q72JY9_THET2, Q72GJ8_THET2, Q72GJ9_THET2, Q72JJ4_THET2	143	7	552	1.65435	1	0.999327	99.9877
INTERPRO	IPR003661:Signal transduction histidine kinase, subgroup 1, dimerisation and phosphoacceptor region	6	0.553506	0.582274	Q72KV3_THET2, Q72GJ8_THET2, Q72IA4_THET2, Q72IJ3_THET2, Q72GJ9_THET2, Q72IY3_THET2, Q72JJ4_THET2	965	18	3493	1.20656	1	1	100
INTERPRO	IPR000014:PAS	3	0.276753	0.617647	Q72JY9_THET2, Q72GJ8_THET2, Q72GJ9_THET2, Q72JJ4_THET2	965	7	3493	1.5513	1	1	100
GOTERM_BP_FAT	GO:0018202~peptidyl-histidine modification	8	0.738007	0.618349	Q72LA1_THET2, Q72KV3_THET2, Q72GJ8_THET2, Q72IA4_THET2, Q72IJ3_THET2, Q72JF5_THET2, Q72GJ9_THET2, Q72IY3_THET2, Q72JJ4_THET2	582	22	1772	1.10715	1	0.999731	99.9999
GOTERM_BP_FAT	GO:0018106~peptidyl-histidine phosphorylation	8	0.738007	0.618349	Q72LA1_THET2, Q72KV3_THET2, Q72GJ8_THET2, Q72IA4_THET2, Q72IJ3_THET2, Q72JF5_THET2, Q72GJ9_THET2, Q72IY3_THET2, Q72JJ4_THET2	582	22	1772	1.10715	1	0.999731	99.9999
SMART	SM00304:HAMP	4	0.369004	0.633724	Q72KV3_THET2, Q72IA4_THET2, Q72IJ3_THET2, Q72IY3_THET2	143	12	552	1.28671	1	0.999562	99.9975
GOTERM_MF_FAT	GO:0004672~protein kinase activity	11	1.01476	0.637911	Q72LA1_THET2, Q72JY9_THET2, Q72GJ2_THET2, Q72KV3_THET2, Q72IA2_THET2, Q72GJ8_THET2, Q72IA4_THET2, Q72IJ3_THET2, Q72JF5_THET2, Q72GJ9_THET2, Q72IY3_THET2, Q72JJ4_THET2	667	33	2095	1.04698	1	0.999974	100
SP_PIR_KEYWORDS	two-component regulatory system	7	0.645756	0.682829	Q72IY4_THET2, Q72KV3_THET2, Q72GJ8_THET2, Q72IA4_THET2, Q72IJ3_THET2, Q72GJ9_THET2, Q72G70_THET2, Q72IY3_THET2	1084	26	4254	1.05656	1	0.947217	99.9999
INTERPRO	IPR003660:HAMP linker domain	4	0.369004	0.685772	Q72KV3_THET2, Q72IA4_THET2, Q72IJ3_THET2, Q72IY3_THET2	965	12	3493	1.20656	1	1	100
COG_ONTOLOGY	Signal transduction mechanisms	6	0.553506	0.714137	Q72LA1_THET2, Q72GJ8_THET2, Q72ID0_THET2, Q72IA4_THET2, Q72JF5_THET2, Q72GJ9_THET2, Q72JT4_THET2	187	22	718	1.04716	1	0.989863	99.9982
SMART	SM00065:GAF	3	0.276753	0.718967	Q72JY9_THET2, Q72JF5_THET2, Q72JJ4_THET2	143	9	552	1.28671	1	0.99971	99.9998
INTERPRO	IPR003018:GAF	3	0.276753	0.758136	Q72JY9_THET2, Q72JF5_THET2, Q72JJ4_THET2	965	9	3493	1.20656	1	1	100
GOTERM_BP_FAT	GO:0006468~protein amino acid phosphorylation	10	0.922509	0.772439	Q72LA1_THET2, Q72GJ2_THET2, Q72KV3_THET2, Q72IA2_THET2, Q72GJ8_THET2, Q72IA4_THET2, Q72IJ3_THET2, Q72JF5_THET2, Q72GJ9_THET2, Q72IY3_THET2, Q72JJ4_THET2	582	32	1772	0.95146	1	0.999899	100
INTERPRO	IPR004358:Signal transduction histidine kinase-related protein, C-terminal	5	0.461255	0.775664	Q72GJ8_THET2, Q72IA4_THET2, Q72IJ3_THET2, Q72GJ9_THET2, Q72IY3_THET2, Q72JJ4_THET2	965	18	3493	1.00547	1	1	100
GOTERM_BP_FAT	GO:0000160~two-component signal transduction system (phosphorelay)	12	1.10701	0.930992	Q72IA4_THET2, Q72JF5_THET2, Q72G70_THET2, Q72IY3_THET2, Q72LA1_THET2, Q72JY5_THET2, Q72JY9_THET2, Q72JJ5_THET2, Q72IY4_THET2, Q72KV3_THET2, Q72GJ8_THET2, Q72IJ3_THET2, Q72GJ9_THET2	582	46	1772	0.794263	1	0.999996	100
Annotation Cluster 63	Enrichment Score: 0.23179014332366332
Category	Term	Count	%	PValue	Genes	List Total	Pop Hits	Pop Total	Fold Enrichment	Bonferroni	Benjamini	FDR
GOTERM_MF_FAT	GO:0015450~P-P-bond-hydrolysis-driven protein transmembrane transporter activity	3	0.276753	0.508403	Q72I24_THET2, Q72KF0_THET2, Q72GW2_THET2	667	5	2095	1.88456	1	0.999907	99.9978
GOTERM_MF_FAT	GO:0022884~macromolecule transmembrane transporter activity	3	0.276753	0.508403	Q72I24_THET2, Q72KF0_THET2, Q72GW2_THET2	667	5	2095	1.88456	1	0.999907	99.9978
GOTERM_MF_FAT	GO:0008320~protein transmembrane transporter activity	3	0.276753	0.508403	Q72I24_THET2, Q72KF0_THET2, Q72GW2_THET2	667	5	2095	1.88456	1	0.999907	99.9978
GOTERM_MF_FAT	GO:0008565~protein transporter activity	5	0.461255	0.899941	Q72I24_THET2, Q72GK3_THET2, Q72KF0_THET2, Q72LP0_THET2, Q72GW2_THET2	667	19	2095	0.82656	1	1	100
Annotation Cluster 64	Enrichment Score: 0.22531616084316725
Category	Term	Count	%	PValue	Genes	List Total	Pop Hits	Pop Total	Fold Enrichment	Bonferroni	Benjamini	FDR
GOTERM_BP_FAT	GO:0009069~serine family amino acid metabolic process	8	0.738007	0.371879	Q72HL8_THET2, GCSH_THET2, Q72HV9_THET2, Q72K32_THET2, SYS_THET2, GCSPB_THET2, Q72LA9_THET2, GLYA_THET2	582	18	1772	1.35319	1	0.999951	99.9021
GOTERM_BP_FAT	GO:0006544~glycine metabolic process	5	0.461255	0.425801	Q72HL8_THET2, GCSH_THET2, GCSPB_THET2, Q72LA9_THET2, GLYA_THET2	582	10	1772	1.52234	1	0.999912	99.9743
GOTERM_BP_FAT	GO:0046395~carboxylic acid catabolic process	6	0.553506	0.644498	Q72HL8_THET2, GCSH_THET2, GCSPB_THET2, TDH_THET2, PDXT_THET2, Q72I55_THET2	582	16	1772	1.14175	1	0.99977	100
GOTERM_BP_FAT	GO:0016054~organic acid catabolic process	6	0.553506	0.644498	Q72HL8_THET2, GCSH_THET2, GCSPB_THET2, TDH_THET2, PDXT_THET2, Q72I55_THET2	582	16	1772	1.14175	1	0.99977	100
GOTERM_BP_FAT	GO:0009063~cellular amino acid catabolic process	6	0.553506	0.644498	Q72HL8_THET2, GCSH_THET2, GCSPB_THET2, TDH_THET2, PDXT_THET2, Q72I55_THET2	582	16	1772	1.14175	1	0.99977	100
GOTERM_BP_FAT	GO:0009310~amine catabolic process	6	0.553506	0.703356	Q72HL8_THET2, GCSH_THET2, GCSPB_THET2, TDH_THET2, PDXT_THET2, Q72I55_THET2	582	17	1772	1.07459	1	0.999767	100
GOTERM_BP_FAT	GO:0009071~serine family amino acid catabolic process	3	0.276753	0.726961	Q72HL8_THET2, GCSH_THET2, GCSPB_THET2	582	7	1772	1.30486	1	0.999809	100
GOTERM_BP_FAT	GO:0006546~glycine catabolic process	3	0.276753	0.726961	Q72HL8_THET2, GCSH_THET2, GCSPB_THET2	582	7	1772	1.30486	1	0.999809	100
Annotation Cluster 65	Enrichment Score: 0.22465624296039427
Category	Term	Count	%	PValue	Genes	List Total	Pop Hits	Pop Total	Fold Enrichment	Bonferroni	Benjamini	FDR
GOTERM_MF_FAT	GO:0043566~structure-specific DNA binding	5	0.461255	0.311986	Q72I50_THET2, MUTL_THET2, RECA_THET2, Q72GV7_THET2, Q72GX7_THET2	667	9	2095	1.74496	1	0.999347	99.6468
GOTERM_MF_FAT	GO:0003684~damaged DNA binding	5	0.461255	0.39856	FPG_THET2, Q72L87_THET2, Q72I50_THET2, RECA_THET2, Q72KB4_THET2	667	10	2095	1.57046	1	0.999806	99.9536
SP_PIR_KEYWORDS	dna repair	10	0.922509	0.430103	FPG_THET2, Q72L87_THET2, Q72I50_THET2, MUTL_THET2, RECA_THET2, RUVA_THET2, Q72IQ7_THET2, RUVC_THET2, NFI_THET2, Q72GX7_THET2	1084	32	4254	1.22636	1	0.841933	99.9061
SP_PIR_KEYWORDS	DNA damage	10	0.922509	0.430103	FPG_THET2, Q72L87_THET2, Q72I50_THET2, MUTL_THET2, RECA_THET2, RUVA_THET2, Q72IQ7_THET2, RUVC_THET2, NFI_THET2, Q72GX7_THET2	1084	32	4254	1.22636	1	0.841933	99.9061
GOTERM_BP_FAT	GO:0033554~cellular response to stress	21	1.93727	0.871544	Q72G97_THET2, Q72HD8_THET2, Q72L87_THET2, RPOA_THET2, MUTL_THET2, RECA_THET2, Q72J77_THET2, Q72JY0_THET2, RUVA_THET2, Q745W4_THET2, Q72KB4_THET2, Q72IQ7_THET2, RUVC_THET2, NFI_THET2, FPG_THET2, Q72JG9_THET2, Q72I50_THET2, Q72IS0_THET2, Q72ID3_THET2, Q72H92_THET2, Q72HF2_THET2, Q72GX7_THET2	582	73	1772	0.875865	1	0.999973	100
GOTERM_BP_FAT	GO:0006974~response to DNA damage stimulus	20	1.84502	0.89283	Q72G97_THET2, Q72L87_THET2, RPOA_THET2, MUTL_THET2, RECA_THET2, Q72J77_THET2, Q72JY0_THET2, RUVA_THET2, Q745W4_THET2, Q72KB4_THET2, Q72IQ7_THET2, RUVC_THET2, NFI_THET2, FPG_THET2, Q72JG9_THET2, Q72I50_THET2, Q72IS0_THET2, Q72ID3_THET2, Q72H92_THET2, Q72HF2_THET2, Q72GX7_THET2	582	71	1772	0.857655	1	0.999985	100
GOTERM_BP_FAT	GO:0006281~DNA repair	20	1.84502	0.89283	Q72G97_THET2, Q72L87_THET2, RPOA_THET2, MUTL_THET2, RECA_THET2, Q72J77_THET2, Q72JY0_THET2, RUVA_THET2, Q745W4_THET2, Q72KB4_THET2, Q72IQ7_THET2, RUVC_THET2, NFI_THET2, FPG_THET2, Q72JG9_THET2, Q72I50_THET2, Q72IS0_THET2, Q72ID3_THET2, Q72H92_THET2, Q72HF2_THET2, Q72GX7_THET2	582	71	1772	0.857655	1	0.999985	100
GOTERM_BP_FAT	GO:0006259~DNA metabolic process	40	3.69004	0.998045	Q72GP2_THET2, Q72IZ1_THET2, RPOA_THET2, Q72J56_THET2, MUTL_THET2, RECA_THET2, Q72GR3_THET2, Q72J77_THET2, Q72GV7_THET2, Q72JY0_THET2, RUVA_THET2, Q745W4_THET2, Q746G3_THET2, RUVC_THET2, FPG_THET2, Q72JG9_THET2, Q72I50_THET2, Q72J83_THET2, Q72ID3_THET2, Q72H92_THET2, Q72GG7_THET2, Q72L57_THET2, Q72GX7_THET2, Q72L87_THET2, Q72G97_THET2, Q72GB7_THET2, Q72KB4_THET2, Q72IQ7_THET2, NFI_THET2, Q72HA7_TH…	582	167	1772	0.729263	1	1	100
Annotation Cluster 66	Enrichment Score: 0.21629382759925744
Category	Term	Count	%	PValue	Genes	List Total	Pop Hits	Pop Total	Fold Enrichment	Bonferroni	Benjamini	FDR
INTERPRO	IPR002034:Alpha-isopropylmalate/homocitrate synthase, conserved site	3	0.276753	0.526634	Q72JC9_THET2, Q72JD1_THET2, HOSC_THET2	965	6	3493	1.80984	1	1	99.9996
GOTERM_MF_FAT	GO:0046912~transferase activity, transferring acyl groups, acyl groups converted into alkyl on transfer	5	0.461255	0.562163	Q72L91_THET2, Q72JC9_THET2, Q72JD1_THET2, HOSC_THET2, Q72J03_THET2	667	12	2095	1.30872	1	0.999929	99.9996
INTERPRO	IPR000891:Pyruvate carboxyltransferase	3	0.276753	0.758136	Q72JC9_THET2, Q72JD1_THET2, HOSC_THET2	965	9	3493	1.20656	1	1	100
Annotation Cluster 67	Enrichment Score: 0.2154589422764852
Category	Term	Count	%	PValue	Genes	List Total	Pop Hits	Pop Total	Fold Enrichment	Bonferroni	Benjamini	FDR
KEGG_PATHWAY	tth00300:Lysine biosynthesis	9	0.830258	0.189418	LYSN_THET2, Q72JQ4_THET2, Q72HE6_THET2, LYSK_THET2, AK_THET2, Q72GE4_THET2, ARGC_THET2, HOSC_THET2, Q72L83_THET2	454	16	1244	1.5413	1	0.579836	91.2738
GOTERM_BP_FAT	GO:0009066~aspartate family amino acid metabolic process	14	1.29151	0.44059	KHSE_THET2, LYSK_THET2, AK_THET2, Q72LE2_THET2, Q72H39_THET2, TDH_THET2, HOSC_THET2, Q72L83_THET2, MTNA_THET2, Q72HE6_THET2, FOLD_THET2, HACB_THET2, ARGC_THET2, Q746J7_THET2	582	37	1772	1.15204	1	0.999493	99.9826
SP_PIR_KEYWORDS	Lysine biosynthesis	5	0.461255	0.494884	LYSK_THET2, HACB_THET2, AK_THET2, ARGC_THET2, HOSC_THET2	1084	14	4254	1.40156	1	0.876768	99.9789
GOTERM_BP_FAT	GO:0009085~lysine biosynthetic process	6	0.553506	0.507137	Q72HE6_THET2, LYSK_THET2, HACB_THET2, AK_THET2, ARGC_THET2, HOSC_THET2	582	14	1772	1.30486	1	0.999645	99.9974
GOTERM_BP_FAT	GO:0006553~lysine metabolic process	6	0.553506	0.507137	Q72HE6_THET2, LYSK_THET2, HACB_THET2, AK_THET2, ARGC_THET2, HOSC_THET2	582	14	1772	1.30486	1	0.999645	99.9974
GOTERM_BP_FAT	GO:0009067~aspartate family amino acid biosynthetic process	13	1.19926	0.535385	KHSE_THET2, LYSK_THET2, AK_THET2, Q72LE2_THET2, Q72H39_THET2, HOSC_THET2, Q72L83_THET2, MTNA_THET2, Q72HE6_THET2, FOLD_THET2, HACB_THET2, ARGC_THET2, Q746J7_THET2	582	36	1772	1.09947	1	0.999634	99.9989
GOTERM_BP_FAT	GO:0000096~sulfur amino acid metabolic process	7	0.645756	0.817998	MTNA_THET2, Q72HV9_THET2, FOLD_THET2, SYS_THET2, Q72H39_THET2, Q72L83_THET2, Q746J7_THET2	582	23	1772	0.92664	1	0.99993	100
GOTERM_BP_FAT	GO:0006555~methionine metabolic process	5	0.461255	0.860628	MTNA_THET2, FOLD_THET2, Q72H39_THET2, Q72L83_THET2, Q746J7_THET2	582	17	1772	0.895492	1	0.999965	100
GOTERM_BP_FAT	GO:0009086~methionine biosynthetic process	5	0.461255	0.860628	MTNA_THET2, FOLD_THET2, Q72H39_THET2, Q72L83_THET2, Q746J7_THET2	582	17	1772	0.895492	1	0.999965	100
GOTERM_BP_FAT	GO:0000097~sulfur amino acid biosynthetic process	6	0.553506	0.869545	MTNA_THET2, FOLD_THET2, SYS_THET2, Q72H39_THET2, Q72L83_THET2, Q746J7_THET2	582	21	1772	0.869907	1	0.999973	100
GOTERM_BP_FAT	GO:0044272~sulfur compound biosynthetic process	12	1.10701	0.917416	MTNA_THET2, LIPA_THET2, FOLD_THET2, SYS_THET2, THII_THET2, Q72LK3_THET2, THIE_THET2, Q72H39_THET2, DXS_THET2, Q72L83_THET2, Q746J7_THET2, LIPB_THET2	582	45	1772	0.811913	1	0.999994	100
GOTERM_BP_FAT	GO:0006790~sulfur metabolic process	15	1.38376	0.944876	Q72KL2_THET2, Q72HV9_THET2, Q72LK3_THET2, THIE_THET2, Q72H39_THET2, Q72L83_THET2, MTNA_THET2, LIPA_THET2, FOLD_THET2, SYS_THET2, Q72KL4_THET2, THII_THET2, DXS_THET2, Q746J7_THET2, LIPB_THET2	582	58	1772	0.787416	1	0.999998	100
Annotation Cluster 68	Enrichment Score: 0.1985236335064361
Category	Term	Count	%	PValue	Genes	List Total	Pop Hits	Pop Total	Fold Enrichment	Bonferroni	Benjamini	FDR
GOTERM_MF_FAT	GO:0008094~DNA-dependent ATPase activity	5	0.461255	0.227438	Q72G97_THET2, Q72IS0_THET2, RECA_THET2, Q72J77_THET2, Q72JY0_THET2, Q745W4_THET2	667	8	2095	1.96308	1	0.99813	97.9675
GOTERM_MF_FAT	GO:0004003~ATP-dependent DNA helicase activity	4	0.369004	0.393776	Q72G97_THET2, Q72IS0_THET2, Q72J77_THET2, Q72JY0_THET2, Q745W4_THET2	667	7	2095	1.79482	1	0.999819	99.9477
INTERPRO	IPR000212:DNA helicase, UvrD/REP type	3	0.276753	0.421894	Q72IS0_THET2, Q72JY0_THET2, Q745W4_THET2	965	5	3493	2.17181	1	1	99.9899
SP_PIR_KEYWORDS	helicase	7	0.645756	0.503397	Q72G97_THET2, Q72IS0_THET2, Q72J77_THET2, RUVA_THET2, Q72JY0_THET2, Q745W4_THET2, Q72J86_THET2, Q72KB4_THET2	1084	22	4254	1.24866	1	0.878905	99.9829
GOTERM_MF_FAT	GO:0008026~ATP-dependent helicase activity	6	0.553506	0.545637	Q72G97_THET2, Q72IS0_THET2, Q72J77_THET2, Q72JY0_THET2, Q745W4_THET2, Q72J86_THET2, Q72KB4_THET2	667	15	2095	1.25637	1	0.99992	99.9993
GOTERM_MF_FAT	GO:0070035~purine NTP-dependent helicase activity	6	0.553506	0.545637	Q72G97_THET2, Q72IS0_THET2, Q72J77_THET2, Q72JY0_THET2, Q745W4_THET2, Q72J86_THET2, Q72KB4_THET2	667	15	2095	1.25637	1	0.99992	99.9993
GOTERM_MF_FAT	GO:0003678~DNA helicase activity	5	0.461255	0.562163	Q72G97_THET2, Q72IS0_THET2, Q72J77_THET2, RUVA_THET2, Q72JY0_THET2, Q745W4_THET2	667	12	2095	1.30872	1	0.999929	99.9996
INTERPRO	IPR011545:DNA/RNA helicase, DEAD/DEAH box type, N-terminal	3	0.276753	0.809937	Q72G97_THET2, Q72J77_THET2, Q72J86_THET2, Q72KB4_THET2	965	10	3493	1.08591	1	1	100
GOTERM_MF_FAT	GO:0004386~helicase activity	7	0.645756	0.881894	Q72G97_THET2, Q72IS0_THET2, Q72J77_THET2, RUVA_THET2, Q72JY0_THET2, Q745W4_THET2, Q72J86_THET2, Q72KB4_THET2	667	26	2095	0.845635	1	1	100
SMART	SM00490:HELICc	3	0.276753	0.911846	Q72G97_THET2, Q72J77_THET2, Q72J86_THET2, Q72KB4_THET2	143	14	552	0.827173	1	0.999996	100
INTERPRO	IPR001650:DNA/RNA helicase, C-terminal	3	0.276753	0.931465	Q72G97_THET2, Q72J77_THET2, Q72J86_THET2, Q72KB4_THET2	965	14	3493	0.775648	1	1	100
SMART	SM00487:DEXDc	3	0.276753	0.946358	Q72G97_THET2, Q72J77_THET2, Q72J86_THET2, Q72KB4_THET2	143	16	552	0.723776	1	0.999999	100
INTERPRO	IPR014021:Helicase, superfamily 1 and 2, ATP-binding	3	0.276753	0.947455	Q72G97_THET2, Q72J77_THET2, Q72J86_THET2, Q72KB4_THET2	965	15	3493	0.723938	1	1	100
INTERPRO	IPR014001:DEAD-like helicase, N-terminal	3	0.276753	0.959848	Q72G97_THET2, Q72J77_THET2, Q72J86_THET2, Q72KB4_THET2	965	16	3493	0.678692	1	1	100
Annotation Cluster 69	Enrichment Score: 0.1981002344589654
Category	Term	Count	%	PValue	Genes	List Total	Pop Hits	Pop Total	Fold Enrichment	Bonferroni	Benjamini	FDR
INTERPRO	IPR001750:NADH:ubiquinone/plastoquinone oxidoreductase	3	0.276753	0.526634	Q72GE0_THET2, Q72GE1_THET2, Q72GD9_THET2	965	6	3493	1.80984	1	1	99.9996
GOTERM_BP_FAT	GO:0022904~respiratory electron transport chain	7	0.645756	0.568918	Q72H24_THET2, Q72GE0_THET2, Q72GD4_THET2, Q72GE1_THET2, Q72GD9_THET2, Q72HC8_THET2, Q72H23_THET2	582	18	1772	1.18404	1	0.999714	99.9996
GOTERM_BP_FAT	GO:0042773~ATP synthesis coupled electron transport	5	0.461255	0.591691	Q72H24_THET2, Q72GE0_THET2, Q72GD4_THET2, Q72GE1_THET2, Q72GD9_THET2	582	12	1772	1.26861	1	0.999754	99.9998
GOTERM_BP_FAT	GO:0045333~cellular respiration	13	1.19926	0.624404	MDH_THET2, Q72H24_THET2, Q72GE1_THET2, Q72L91_THET2, Q72GE0_THET2, Q72JK2_THET2, Q72GZ6_THET2, Q72GD4_THET2, Q72GD9_THET2, Q72IP3_THET2, Q72HC8_THET2, CAPP_THET2, Q72H23_THET2	582	38	1772	1.0416	1	0.999738	100
GOTERM_BP_FAT	GO:0015980~energy derivation by oxidation of organic compounds	14	1.29151	0.730653	MDH_THET2, Q72H24_THET2, Q72GE1_THET2, Q72L91_THET2, Q72GE0_THET2, Q72JK2_THET2, Q72GZ6_THET2, GPDA_THET2, Q72GD4_THET2, Q72GD9_THET2, Q72IP3_THET2, Q72HC8_THET2, CAPP_THET2, Q72H23_THET2	582	44	1772	0.96876	1	0.99981	100
GOTERM_BP_FAT	GO:0022900~electron transport chain	8	0.738007	0.800882	Q72H24_THET2, Q72GE0_THET2, Q72JK2_THET2, Q72GD4_THET2, Q72GE1_THET2, Q72GD9_THET2, Q72HC8_THET2, Q72H23_THET2	582	26	1772	0.936823	1	0.999909	100
Annotation Cluster 70	Enrichment Score: 0.19009093020377704
Category	Term	Count	%	PValue	Genes	List Total	Pop Hits	Pop Total	Fold Enrichment	Bonferroni	Benjamini	FDR
GOTERM_BP_FAT	GO:0042254~ribosome biogenesis	8	0.738007	0.499967	RL20_THET2, RIMP_THET2, Q72L94_THET2, RLMN_THET2, RSMG_THET2, RSMA_THET2, RL10_THET2, Q72K73_THET2	582	20	1772	1.21787	1	0.999686	99.9967
GOTERM_BP_FAT	GO:0022613~ribonucleoprotein complex biogenesis	8	0.738007	0.499967	RL20_THET2, RIMP_THET2, Q72L94_THET2, RLMN_THET2, RSMG_THET2, RSMA_THET2, RL10_THET2, Q72K73_THET2	582	20	1772	1.21787	1	0.999686	99.9967
SP_PIR_KEYWORDS	rrna processing	3	0.276753	0.566558	RLMN_THET2, RSMG_THET2, RSMA_THET2	1084	7	4254	1.68187	1	0.913072	99.9968
GOTERM_MF_FAT	GO:0008649~rRNA methyltransferase activity	3	0.276753	0.617945	Q72L94_THET2, RSMG_THET2, RSMA_THET2	667	6	2095	1.57046	1	0.999966	100
GOTERM_MF_FAT	GO:0008173~RNA methyltransferase activity	9	0.830258	0.786739	Q72H04_THET2, TRMI_THET2, Q72L94_THET2, TRMFO_THET2, RLMN_THET2, RSMG_THET2, RSMA_THET2, Q72JF4_THET2, TRMB_THET2	667	30	2095	0.942279	1	0.999997	100
GOTERM_BP_FAT	GO:0006364~rRNA processing	5	0.461255	0.823623	Q72L94_THET2, RLMN_THET2, RSMG_THET2, RSMA_THET2, Q72K73_THET2	582	16	1772	0.95146	1	0.99993	100
GOTERM_BP_FAT	GO:0016072~rRNA metabolic process	5	0.461255	0.823623	Q72L94_THET2, RLMN_THET2, RSMG_THET2, RSMA_THET2, Q72K73_THET2	582	16	1772	0.95146	1	0.99993	100
Annotation Cluster 71	Enrichment Score: 0.18733586619728732
Category	Term	Count	%	PValue	Genes	List Total	Pop Hits	Pop Total	Fold Enrichment	Bonferroni	Benjamini	FDR
GOTERM_MF_FAT	GO:0008408~3'-5' exonuclease activity	4	0.369004	0.393776	Q72GP2_THET2, Q72K93_THET2, Q72H86_THET2, PNP_THET2	667	7	2095	1.79482	1	0.999819	99.9477
GOTERM_MF_FAT	GO:0004527~exonuclease activity	7	0.645756	0.70256	Q72GP2_THET2, Q72JG9_THET2, Q72J56_THET2, Q72K93_THET2, Q72H86_THET2, Q72L57_THET2, PNP_THET2	667	21	2095	1.04698	1	0.999991	100
GOTERM_MF_FAT	GO:0004518~nuclease activity	12	1.10701	0.990968	Q72GP2_THET2, Q72JG9_THET2, Q72J56_THET2, Q72K93_THET2, Q72HF2_THET2, Q72H86_THET2, Q72IQ7_THET2, Q72I36_THET2, Q72L57_THET2, PNP_THET2, RUVC_THET2, NFI_THET2	667	58	2095	0.649847	1	1	100
Annotation Cluster 72	Enrichment Score: 0.18342253932002758
Category	Term	Count	%	PValue	Genes	List Total	Pop Hits	Pop Total	Fold Enrichment	Bonferroni	Benjamini	FDR
SMART	SM00020:Tryp_SPc	3	0.276753	0.483786	Q72GE3_THET2, Q72J25_THET2, Q72KS5_THET2	143	6	552	1.93007	1	0.999794	99.9066
SMART	SM00228:PDZ	4	0.369004	0.496914	Q72GE3_THET2, Q72J25_THET2, Q72J50_THET2, Q72KS5_THET2	143	10	552	1.54406	1	0.999478	99.9289
INTERPRO	IPR001940:Peptidase S1C, HrtA/DegP2/Q/S	3	0.276753	0.526634	Q72GE3_THET2, Q72J25_THET2, Q72KS5_THET2	965	6	3493	1.80984	1	1	99.9996
INTERPRO	IPR001254:Peptidase S1 and S6, chymotrypsin/Hap	3	0.276753	0.526634	Q72GE3_THET2, Q72J25_THET2, Q72KS5_THET2	965	6	3493	1.80984	1	1	99.9996
INTERPRO	IPR001478:PDZ/DHR/GLGF	4	0.369004	0.550932	Q72GE3_THET2, Q72J25_THET2, Q72J50_THET2, Q72KS5_THET2	965	10	3493	1.44788	1	1	99.9999
GOTERM_MF_FAT	GO:0017171~serine hydrolase activity	6	0.553506	0.969784	Q72GA0_THET2, Q72GE3_THET2, Q72IX8_THET2, Q72J25_THET2, Q72J50_THET2, Q72KS5_THET2	667	28	2095	0.673056	1	1	100
GOTERM_MF_FAT	GO:0008236~serine-type peptidase activity	6	0.553506	0.969784	Q72GA0_THET2, Q72GE3_THET2, Q72IX8_THET2, Q72J25_THET2, Q72J50_THET2, Q72KS5_THET2	667	28	2095	0.673056	1	1	100
GOTERM_MF_FAT	GO:0004252~serine-type endopeptidase activity	4	0.369004	0.986777	Q72GA0_THET2, Q72GE3_THET2, Q72J25_THET2, Q72KS5_THET2	667	22	2095	0.571078	1	1	100
Annotation Cluster 73	Enrichment Score: 0.17985001224565042
Category	Term	Count	%	PValue	Genes	List Total	Pop Hits	Pop Total	Fold Enrichment	Bonferroni	Benjamini	FDR
SP_PIR_KEYWORDS	Flavoprotein	12	1.10701	0.619153	Q72HD8_THET2, Q72JI3_THET2, Q72HC0_THET2, TRMFO_THET2, MNMG_THET2, Q72GV4_THET2, Q72H39_THET2, FENR_THET2, MURB_THET2, Q72L25_THET2, Q72HE1_THET2, Q72LQ1_THET2	1084	45	4254	1.04649	1	0.935118	99.9994
SP_PIR_KEYWORDS	FAD	10	0.922509	0.660334	Q72HD8_THET2, Q72JI3_THET2, Q72HC0_THET2, TRMFO_THET2, MNMG_THET2, Q72H39_THET2, FENR_THET2, MURB_THET2, Q72L25_THET2, Q72HE1_THET2	1084	38	4254	1.03272	1	0.94641	99.9998
GOTERM_MF_FAT	GO:0050660~FAD binding	18	1.66052	0.706136	Q72HF3_THET2, Q72HD8_THET2, Q72JI3_THET2, Q72G66_THET2, TRMFO_THET2, Q72HK3_THET2, Q72JC5_THET2, FENR_THET2, MURB_THET2, Q72L25_THET2, Q72GA8_THET2, Q72KK5_THET2, Q72HC0_THET2, MNMG_THET2, Q72JC6_THET2, Q72LD0_THET2, Q72HE1_THET2, Q72LD1_THET2	667	58	2095	0.974771	1	0.99999	100
Annotation Cluster 74	Enrichment Score: 0.17794533365655898
Category	Term	Count	%	PValue	Genes	List Total	Pop Hits	Pop Total	Fold Enrichment	Bonferroni	Benjamini	FDR
GOTERM_CC_FAT	GO:0030312~external encapsulating structure	15	1.38376	0.535373	Q72JA6_THET2, Q72IW4_THET2, Q72J15_THET2, Q72KH0_THET2, DDL_THET2, Q72JG5_THET2, Q72GQ8_THET2, Q72GX4_THET2, Q72KF0_THET2, Q72K21_THET2, Q72JA2_THET2, Q72JF3_THET2, MURG_THET2, Q72HN0_THET2, Q72L19_THET2	169	41	499	1.08024	1	0.998874	99.9563
GOTERM_CC_FAT	GO:0030313~cell envelope	13	1.19926	0.583214	Q72JG5_THET2, Q72JA6_THET2, Q72GX4_THET2, Q72GQ8_THET2, Q72KF0_THET2, Q72IW4_THET2, Q72K21_THET2, Q72JA2_THET2, Q72J15_THET2, Q72HN0_THET2, MURG_THET2, Q72L19_THET2, Q72KH0_THET2	169	36	499	1.06624	1	0.992794	99.9854
GOTERM_CC_FAT	GO:0031975~envelope	13	1.19926	0.583214	Q72JG5_THET2, Q72JA6_THET2, Q72GX4_THET2, Q72GQ8_THET2, Q72KF0_THET2, Q72IW4_THET2, Q72K21_THET2, Q72JA2_THET2, Q72J15_THET2, Q72HN0_THET2, MURG_THET2, Q72L19_THET2, Q72KH0_THET2	169	36	499	1.06624	1	0.992794	99.9854
GOTERM_CC_FAT	GO:0044462~external encapsulating structure part	9	0.830258	0.743096	Q72JG5_THET2, Q72JA6_THET2, Q72GQ8_THET2, Q72IW4_THET2, Q72K21_THET2, Q72J15_THET2, Q72HN0_THET2, Q72L19_THET2, Q72KH0_THET2	169	27	499	0.984221	1	0.996366	99.9999
GOTERM_CC_FAT	GO:0030288~outer membrane-bounded periplasmic space	8	0.738007	0.795217	Q72JG5_THET2, Q72JA6_THET2, Q72GQ8_THET2, Q72K21_THET2, Q72J15_THET2, Q72HN0_THET2, Q72L19_THET2, Q72KH0_THET2	169	25	499	0.944852	1	0.995756	100
GOTERM_CC_FAT	GO:0042597~periplasmic space	8	0.738007	0.795217	Q72JG5_THET2, Q72JA6_THET2, Q72GQ8_THET2, Q72K21_THET2, Q72J15_THET2, Q72HN0_THET2, Q72L19_THET2, Q72KH0_THET2	169	25	499	0.944852	1	0.995756	100
Annotation Cluster 75	Enrichment Score: 0.1703127442162228
Category	Term	Count	%	PValue	Genes	List Total	Pop Hits	Pop Total	Fold Enrichment	Bonferroni	Benjamini	FDR
INTERPRO	IPR016038:Thiolase-like, subgroup	5	0.461255	0.502464	Q72KX0_THET2, Q72L72_THET2, Q72LL0_THET2, Q72LL4_THET2, Q72JZ5_THET2	965	13	3493	1.39219	1	1	99.9992
INTERPRO	IPR002155:Thiolase	3	0.276753	0.694527	Q72KX0_THET2, Q72L72_THET2, Q72JZ5_THET2	965	8	3493	1.35738	1	1	100
PIR_SUPERFAMILY	PIRSF000429:acetyl-CoA acetyltransferase	3	0.276753	0.77264	Q72KX0_THET2, Q72L72_THET2, Q72JZ5_THET2	677	8	2150	1.19092	1	1	100
PIR_SUPERFAMILY	PIRSF000429:Ac-CoA_Ac_transf	3	0.276753	0.77264	Q72KX0_THET2, Q72L72_THET2, Q72JZ5_THET2	677	8	2150	1.19092	1	1	100
Annotation Cluster 76	Enrichment Score: 0.15214182654808672
Category	Term	Count	%	PValue	Genes	List Total	Pop Hits	Pop Total	Fold Enrichment	Bonferroni	Benjamini	FDR
INTERPRO	IPR013027:FAD-dependent pyridine nucleotide-disulphide oxidoreductase	7	0.645756	0.687015	Q72HD8_THET2, Q72JI3_THET2, Q72GS8_THET2, Q72JC5_THET2, Q72HK3_THET2, FENR_THET2, Q72JZ9_THET2	965	24	3493	1.05574	1	1	100
INTERPRO	IPR000103:Pyridine nucleotide-disulphide oxidoreductase, class-II	3	0.276753	0.694527	Q72HD8_THET2, Q72JC5_THET2, FENR_THET2	965	8	3493	1.35738	1	1	100
INTERPRO	IPR001327:Pyridine nucleotide-disulphide oxidoreductase, NAD-binding region	5	0.461255	0.732688	Q72HD8_THET2, Q72JI3_THET2, Q72JC5_THET2, Q72HK3_THET2, FENR_THET2	965	17	3493	1.06461	1	1	100
Annotation Cluster 77	Enrichment Score: 0.14833528236955495
Category	Term	Count	%	PValue	Genes	List Total	Pop Hits	Pop Total	Fold Enrichment	Bonferroni	Benjamini	FDR
GOTERM_MF_FAT	GO:0016878~acid-thiol ligase activity	4	0.369004	0.584374	Q72L91_THET2, Q72GY5_THET2, Q72J60_THET2, ACSA_THET2	667	9	2095	1.39597	1	0.999938	99.9998
GOTERM_MF_FAT	GO:0016405~CoA-ligase activity	3	0.276753	0.778957	Q72L91_THET2, Q72J60_THET2, ACSA_THET2	667	8	2095	1.17785	1	0.999996	100
GOTERM_MF_FAT	GO:0016877~ligase activity, forming carbon-sulfur bonds	4	0.369004	0.788478	Q72L91_THET2, Q72GY5_THET2, Q72J60_THET2, ACSA_THET2	667	12	2095	1.04698	1	0.999997	100
Annotation Cluster 78	Enrichment Score: 0.14265482956088496
Category	Term	Count	%	PValue	Genes	List Total	Pop Hits	Pop Total	Fold Enrichment	Bonferroni	Benjamini	FDR
KEGG_PATHWAY	tth00790:Folate biosynthesis	4	0.369004	0.500242	Q72J06_THET2, Q72H55_THET2, Q72GQ3_THET2, Q72GQ2_THET2	454	7	1244	1.56576	1	0.86096	99.9683
GOTERM_BP_FAT	GO:0006760~folic acid and derivative metabolic process	6	0.553506	0.837684	FOLD_THET2, Q72GP5_THET2, Q72J06_THET2, Q72H55_THET2, Q72GQ3_THET2, Q72GQ2_THET2	582	20	1772	0.913402	1	0.999952	100
GOTERM_BP_FAT	GO:0009396~folic acid and derivative biosynthetic process	5	0.461255	0.890789	FOLD_THET2, Q72GP5_THET2, Q72J06_THET2, Q72H55_THET2, Q72GQ3_THET2	582	18	1772	0.845743	1	0.999984	100
Annotation Cluster 79	Enrichment Score: 0.1392411535289142
Category	Term	Count	%	PValue	Genes	List Total	Pop Hits	Pop Total	Fold Enrichment	Bonferroni	Benjamini	FDR
KEGG_PATHWAY	tth00740:Riboflavin metabolism	4	0.369004	0.500242	Q72JR9_THET2, Q72JS1_THET2, Q72JS0_THET2, Q72LA0_THET2	454	7	1244	1.56576	1	0.86096	99.9683
GOTERM_BP_FAT	GO:0042726~riboflavin and derivative metabolic process	3	0.276753	0.796441	Q72JR9_THET2, Q72JS1_THET2, Q72LA0_THET2	582	8	1772	1.14175	1	0.999905	100
GOTERM_BP_FAT	GO:0006771~riboflavin metabolic process	3	0.276753	0.796441	Q72JR9_THET2, Q72JS1_THET2, Q72LA0_THET2	582	8	1772	1.14175	1	0.999905	100
GOTERM_BP_FAT	GO:0042727~riboflavin and derivative biosynthetic process	3	0.276753	0.796441	Q72JR9_THET2, Q72JS1_THET2, Q72LA0_THET2	582	8	1772	1.14175	1	0.999905	100
GOTERM_BP_FAT	GO:0009231~riboflavin biosynthetic process	3	0.276753	0.796441	Q72JR9_THET2, Q72JS1_THET2, Q72LA0_THET2	582	8	1772	1.14175	1	0.999905	100
Annotation Cluster 80	Enrichment Score: 0.13848872657443378
Category	Term	Count	%	PValue	Genes	List Total	Pop Hits	Pop Total	Fold Enrichment	Bonferroni	Benjamini	FDR
GOTERM_BP_FAT	GO:0031327~negative regulation of cellular biosynthetic process	3	0.276753	0.726961	Q72L24_THET2, Q72K09_THET2, NPD_THET2, REX_THET2	582	7	1772	1.30486	1	0.999809	100
GOTERM_BP_FAT	GO:0010605~negative regulation of macromolecule metabolic process	3	0.276753	0.726961	Q72L24_THET2, Q72K09_THET2, NPD_THET2, REX_THET2	582	7	1772	1.30486	1	0.999809	100
GOTERM_BP_FAT	GO:0045934~negative regulation of nucleobase, nucleoside, nucleotide and nucleic acid metabolic process	3	0.276753	0.726961	Q72L24_THET2, Q72K09_THET2, NPD_THET2, REX_THET2	582	7	1772	1.30486	1	0.999809	100
GOTERM_BP_FAT	GO:0010558~negative regulation of macromolecule biosynthetic process	3	0.276753	0.726961	Q72L24_THET2, Q72K09_THET2, NPD_THET2, REX_THET2	582	7	1772	1.30486	1	0.999809	100
GOTERM_BP_FAT	GO:0051172~negative regulation of nitrogen compound metabolic process	3	0.276753	0.726961	Q72L24_THET2, Q72K09_THET2, NPD_THET2, REX_THET2	582	7	1772	1.30486	1	0.999809	100
GOTERM_BP_FAT	GO:0010629~negative regulation of gene expression	3	0.276753	0.726961	Q72L24_THET2, Q72K09_THET2, NPD_THET2, REX_THET2	582	7	1772	1.30486	1	0.999809	100
GOTERM_BP_FAT	GO:0009890~negative regulation of biosynthetic process	3	0.276753	0.726961	Q72L24_THET2, Q72K09_THET2, NPD_THET2, REX_THET2	582	7	1772	1.30486	1	0.999809	100
GOTERM_BP_FAT	GO:0016481~negative regulation of transcription	3	0.276753	0.726961	Q72L24_THET2, Q72K09_THET2, NPD_THET2, REX_THET2	582	7	1772	1.30486	1	0.999809	100
Annotation Cluster 81	Enrichment Score: 0.1359254337415453
Category	Term	Count	%	PValue	Genes	List Total	Pop Hits	Pop Total	Fold Enrichment	Bonferroni	Benjamini	FDR
SP_PIR_KEYWORDS	Rotamase	3	0.276753	0.644461	Q72H58_THET2, Q72H64_THET2, TIG_THET2	1084	8	4254	1.47163	1	0.941798	99.9997
GOTERM_MF_FAT	GO:0016859~cis-trans isomerase activity	3	0.276753	0.778957	Q72H58_THET2, Q72H64_THET2, TIG_THET2	667	8	2095	1.17785	1	0.999996	100
GOTERM_MF_FAT	GO:0003755~peptidyl-prolyl cis-trans isomerase activity	3	0.276753	0.778957	Q72H58_THET2, Q72H64_THET2, TIG_THET2	667	8	2095	1.17785	1	0.999996	100
Annotation Cluster 82	Enrichment Score: 0.12988571534814203
Category	Term	Count	%	PValue	Genes	List Total	Pop Hits	Pop Total	Fold Enrichment	Bonferroni	Benjamini	FDR
INTERPRO	IPR006674:Metal-dependent phosphohydrolase, HD region, subdomain	7	0.645756	0.542838	Q72JY5_THET2, Q72JY9_THET2, Q746F3_THET2, Q72IX1_THET2, Q72HX7_THET2, Q72LL5_THET2, Q72HR6_THET2	965	21	3493	1.20656	1	1	99.9998
SMART	SM00471:HDc	6	0.553506	0.783731	Q72JY5_THET2, Q72JY9_THET2, Q72IX1_THET2, Q72HX7_THET2, Q72LL5_THET2, Q72HR6_THET2	143	24	552	0.965035	1	0.999885	100
INTERPRO	IPR003607:Metal-dependent phosphohydrolase, HD region	6	0.553506	0.834423	Q72JY5_THET2, Q72JY9_THET2, Q72IX1_THET2, Q72HX7_THET2, Q72LL5_THET2, Q72HR6_THET2	965	24	3493	0.904922	1	1	100
INTERPRO	IPR006675:HDIG	3	0.276753	0.851596	Q72JY5_THET2, Q72IX1_THET2, Q72LL5_THET2	965	11	3493	0.987188	1	1	100
Annotation Cluster 83	Enrichment Score: 0.12660271606309975
Category	Term	Count	%	PValue	Genes	List Total	Pop Hits	Pop Total	Fold Enrichment	Bonferroni	Benjamini	FDR
GOTERM_MF_FAT	GO:0010181~FMN binding	6	0.553506	0.725601	Q72K23_THET2, Q72LK7_THET2, Q72GV4_THET2, Q72GD3_THET2, Q72HI0_THET2, Q72ID7_THET2	667	18	2095	1.04698	1	0.999992	100
INTERPRO	IPR012349:FMN-binding split barrel	3	0.276753	0.758136	Q72K23_THET2, Q72LK7_THET2, Q72HI0_THET2	965	9	3493	1.20656	1	1	100
INTERPRO	IPR002563:Flavin reductase-like, FMN-binding	3	0.276753	0.758136	Q72K23_THET2, Q72LK7_THET2, Q72HI0_THET2	965	9	3493	1.20656	1	1	100
Annotation Cluster 84	Enrichment Score: 0.11488559069871178
Category	Term	Count	%	PValue	Genes	List Total	Pop Hits	Pop Total	Fold Enrichment	Bonferroni	Benjamini	FDR
GOTERM_BP_FAT	GO:0032774~RNA biosynthetic process	8	0.738007	0.499967	RPOC_THET2, NUSB_THET2, Q72KG4_THET2, RPOZ_THET2, RPOA_THET2, Q72J83_THET2, RPOB_THET2, Q72GW1_THET2	582	20	1772	1.21787	1	0.999686	99.9967
GOTERM_BP_FAT	GO:0006351~transcription, DNA-dependent	7	0.645756	0.568918	RPOC_THET2, NUSB_THET2, Q72KG4_THET2, RPOZ_THET2, RPOA_THET2, RPOB_THET2, Q72GW1_THET2	582	18	1772	1.18404	1	0.999714	99.9996
SP_PIR_KEYWORDS	Transcription	18	1.66052	0.791637	NUSB_THET2, RPOZ_THET2, Q72KG4_THET2, RPOA_THET2, RPOB_THET2, ARGR_THET2, Q72IY7_THET2, Q72L08_THET2, RPOC_THET2, Q72J83_THET2, Q72IB7_THET2, Q72L24_THET2, Q72GP8_THET2, Q72K09_THET2, REX_THET2, Q72ID0_THET2, NRDR_THET2, Q72GM9_THET2, Q72GW1_THET2	1084	77	4254	0.917382	1	0.975589	100
GOTERM_MF_FAT	GO:0030528~transcription regulator activity	29	2.67528	0.956858	COAX_THET2, Q72K75_THET2, Q72G70_THET2, Q72JY5_THET2, Q72L08_THET2, Q72GN0_THET2, Q72GW8_THET2, Q72JJ5_THET2, Q72IY4_THET2, Q72L24_THET2, Q72K09_THET2, Q72GJ8_THET2, Q72ID0_THET2, Q72GJ9_THET2, Q746J7_THET2, NUSB_THET2, Q72KG4_THET2, SYN_THET2, ARGR_THET2, Q72JH4_THET2, Q72KB4_THET2, Q72IY7_THET2, Q72H56_THET2, Q72IB7_THET2, Q72GP8_THET2, Q72LC7_THET2, Q72JI1_THET2, REX_THET2, Q72KW6_THET2, NRDR_…	667	112	2095	0.813276	1	1	100
SP_PIR_KEYWORDS	transcription regulation	13	1.19926	0.959233	NUSB_THET2, Q72KG4_THET2, ARGR_THET2, Q72IY7_THET2, Q72L08_THET2, Q72IB7_THET2, Q72L24_THET2, Q72GP8_THET2, Q72K09_THET2, REX_THET2, Q72ID0_THET2, NRDR_THET2, Q72GM9_THET2, Q72GW1_THET2	1084	69	4254	0.739371	1	0.998704	100
GOTERM_BP_FAT	GO:0006350~transcription	18	1.66052	0.98946	NUSB_THET2, RPOZ_THET2, Q72KG4_THET2, RPOA_THET2, RPOB_THET2, ARGR_THET2, Q72IY7_THET2, Q72L08_THET2, RPOC_THET2, Q72J83_THET2, Q72IB7_THET2, Q72L24_THET2, Q72GP8_THET2, Q72K09_THET2, REX_THET2, Q72ID0_THET2, NRDR_THET2, Q72GM9_THET2, Q72GW1_THET2	582	78	1772	0.702617	1	1	100
Annotation Cluster 85	Enrichment Score: 0.11238885198149487
Category	Term	Count	%	PValue	Genes	List Total	Pop Hits	Pop Total	Fold Enrichment	Bonferroni	Benjamini	FDR
INTERPRO	IPR016162:Aldehyde dehydrogenase, N-terminal	4	0.369004	0.685772	Q72K14_THET2, Q72IB9_THET2, Q72K25_THET2, PROA_THET2	965	12	3493	1.20656	1	1	100
INTERPRO	IPR015590:Aldehyde dehydrogenase	4	0.369004	0.787808	Q72K14_THET2, Q72IB9_THET2, Q72K25_THET2, PROA_THET2	965	14	3493	1.0342	1	1	100
INTERPRO	IPR016160:Aldehyde dehydrogenase, conserved site	3	0.276753	0.851596	Q72K14_THET2, Q72IB9_THET2, Q72K25_THET2	965	11	3493	0.987188	1	1	100
Annotation Cluster 86	Enrichment Score: 0.10433075852697642
Category	Term	Count	%	PValue	Genes	List Total	Pop Hits	Pop Total	Fold Enrichment	Bonferroni	Benjamini	FDR
SP_PIR_KEYWORDS	respiratory chain	3	0.276753	0.644461	Q72H24_THET2, Q72JK2_THET2, Q72H23_THET2	1084	8	4254	1.47163	1	0.941798	99.9997
SP_PIR_KEYWORDS	electron transport	4	0.369004	0.732314	Q72H24_THET2, Q72JK2_THET2, Q72HC8_THET2, Q72H23_THET2	1084	14	4254	1.12124	1	0.959267	100
GOTERM_BP_FAT	GO:0022900~electron transport chain	8	0.738007	0.800882	Q72H24_THET2, Q72GE0_THET2, Q72JK2_THET2, Q72GD4_THET2, Q72GE1_THET2, Q72GD9_THET2, Q72HC8_THET2, Q72H23_THET2	582	26	1772	0.936823	1	0.999909	100
GOTERM_CC_FAT	GO:0070469~respiratory chain	3	0.276753	0.812525	Q72H24_THET2, Q72JK2_THET2, Q72H23_THET2	169	8	499	1.10725	1	0.995759	100
GOTERM_MF_FAT	GO:0020037~heme binding	8	0.738007	0.979596	Q72H24_THET2, Q72JK2_THET2, Q72HC5_THET2, Q746J6_THET2, Q72KM0_THET2, Q72IU7_THET2, Q72H23_THET2, Q72IS4_THET2	667	38	2095	0.661248	1	1	100
Annotation Cluster 87	Enrichment Score: 0.10351795566652158
Category	Term	Count	%	PValue	Genes	List Total	Pop Hits	Pop Total	Fold Enrichment	Bonferroni	Benjamini	FDR
INTERPRO	IPR017941:Rieske [2Fe-2S] iron-sulphur domain	3	0.276753	0.617647	Q72IU8_THET2, Q72HC7_THET2, Q72HJ7_THET2	965	7	3493	1.5513	1	1	100
SP_PIR_KEYWORDS	2Fe-2S	3	0.276753	0.812557	Q72IU8_THET2, Q72HC7_THET2, Q72HJ7_THET2	1084	11	4254	1.07028	1	0.979044	100
GOTERM_MF_FAT	GO:0051537~2 iron, 2 sulfur cluster binding	3	0.276753	0.974657	Q72IU8_THET2, Q72HC7_THET2, Q72HJ7_THET2	667	15	2095	0.628186	1	1	100
Annotation Cluster 88	Enrichment Score: 0.10174727901777114
Category	Term	Count	%	PValue	Genes	List Total	Pop Hits	Pop Total	Fold Enrichment	Bonferroni	Benjamini	FDR
GOTERM_MF_FAT	GO:0046873~metal ion transmembrane transporter activity	7	0.645756	0.53247	Q745X6_THET2, Q72HB7_THET2, Q72KN7_THET2, Q72HW1_THET2, Q72KV1_THET2, Q72KF9_THET2, Q72HZ0_THET2	667	18	2095	1.22147	1	0.999919	99.999
INTERPRO	IPR002491:Periplasmic binding protein	3	0.276753	0.694527	Q745X6_THET2, Q72KN7_THET2, Q72KV1_THET2	965	8	3493	1.35738	1	1	100
GOTERM_MF_FAT	GO:0005381~iron ion transmembrane transporter activity	3	0.276753	0.778957	Q745X6_THET2, Q72KN7_THET2, Q72KV1_THET2	667	8	2095	1.17785	1	0.999996	100
GOTERM_MF_FAT	GO:0046915~transition metal ion transmembrane transporter activity	4	0.369004	0.788478	Q745X6_THET2, Q72KN7_THET2, Q72HW1_THET2, Q72KV1_THET2	667	12	2095	1.04698	1	0.999997	100
GOTERM_MF_FAT	GO:0015082~di-, tri-valent inorganic cation transmembrane transporter activity	4	0.369004	0.788478	Q745X6_THET2, Q72KN7_THET2, Q72HW1_THET2, Q72KV1_THET2	667	12	2095	1.04698	1	0.999997	100
GOTERM_BP_FAT	GO:0006827~high-affinity iron ion transport	3	0.276753	0.796441	Q745X6_THET2, Q72KN7_THET2, Q72KV1_THET2	582	8	1772	1.14175	1	0.999905	100
GOTERM_BP_FAT	GO:0034755~iron ion transmembrane transport	3	0.276753	0.796441	Q745X6_THET2, Q72KN7_THET2, Q72KV1_THET2	582	8	1772	1.14175	1	0.999905	100
GOTERM_BP_FAT	GO:0000041~transition metal ion transport	4	0.369004	0.936047	Q745X6_THET2, Q72KN7_THET2, Q72HW1_THET2, Q72KV1_THET2	582	16	1772	0.761168	1	0.999997	100
GOTERM_BP_FAT	GO:0006826~iron ion transport	3	0.276753	0.942347	Q745X6_THET2, Q72KN7_THET2, Q72KV1_THET2	582	12	1772	0.761168	1	0.999997	100
GOTERM_BP_FAT	GO:0015674~di-, tri-valent inorganic cation transport	3	0.276753	0.958596	Q745X6_THET2, Q72KN7_THET2, Q72KV1_THET2	582	13	1772	0.702617	1	0.999999	100
Annotation Cluster 89	Enrichment Score: 0.0975266740358537
Category	Term	Count	%	PValue	Genes	List Total	Pop Hits	Pop Total	Fold Enrichment	Bonferroni	Benjamini	FDR
INTERPRO	IPR000445:Helix-hairpin-helix motif	3	0.276753	0.526634	Q72H92_THET2, RUVA_THET2, Q72HF2_THET2	965	6	3493	1.80984	1	1	99.9996
SMART	SM00278:HhH1	4	0.369004	0.980703	RPOA_THET2, Q72H92_THET2, RUVA_THET2, Q72HF2_THET2	143	26	552	0.593868	1	1	100
INTERPRO	IPR003583:Helix-hairpin-helix DNA-binding, class 1	4	0.369004	0.987127	RPOA_THET2, Q72H92_THET2, RUVA_THET2, Q72HF2_THET2	965	26	3493	0.556875	1	1	100
Annotation Cluster 90	Enrichment Score: 0.09399706490035035
Category	Term	Count	%	PValue	Genes	List Total	Pop Hits	Pop Total	Fold Enrichment	Bonferroni	Benjamini	FDR
KEGG_PATHWAY	tth00730:Thiamine metabolism	5	0.461255	0.426668	Q72HV9_THET2, Q72LH2_THET2, THII_THET2, Q72LK3_THET2, THIE_THET2	454	9	1244	1.52227	1	0.831383	99.8436
SP_PIR_KEYWORDS	thiamine biosynthesis	3	0.276753	0.710826	THII_THET2, THIE_THET2, DXS_THET2	1084	9	4254	1.30812	1	0.952776	100
GOTERM_BP_FAT	GO:0009228~thiamin biosynthetic process	4	0.369004	0.914967	THII_THET2, Q72LK3_THET2, THIE_THET2, DXS_THET2	582	15	1772	0.811913	1	0.999994	100
GOTERM_BP_FAT	GO:0044272~sulfur compound biosynthetic process	12	1.10701	0.917416	MTNA_THET2, LIPA_THET2, FOLD_THET2, SYS_THET2, THII_THET2, Q72LK3_THET2, THIE_THET2, Q72H39_THET2, DXS_THET2, Q72L83_THET2, Q746J7_THET2, LIPB_THET2	582	45	1772	0.811913	1	0.999994	100
GOTERM_BP_FAT	GO:0006772~thiamin metabolic process	4	0.369004	0.952208	THII_THET2, Q72LK3_THET2, THIE_THET2, DXS_THET2	582	17	1772	0.716394	1	0.999999	100
GOTERM_BP_FAT	GO:0042724~thiamin and derivative biosynthetic process	4	0.369004	0.952208	THII_THET2, Q72LK3_THET2, THIE_THET2, DXS_THET2	582	17	1772	0.716394	1	0.999999	100
GOTERM_BP_FAT	GO:0042723~thiamin and derivative metabolic process	4	0.369004	0.952208	THII_THET2, Q72LK3_THET2, THIE_THET2, DXS_THET2	582	17	1772	0.716394	1	0.999999	100
Annotation Cluster 91	Enrichment Score: 0.09244867625918873
Category	Term	Count	%	PValue	Genes	List Total	Pop Hits	Pop Total	Fold Enrichment	Bonferroni	Benjamini	FDR
INTERPRO	IPR002586:Cobyrinic acid a,c-diamide synthase	3	0.276753	0.758136	Q72JA0_THET2, Q746Q1_THET2, Q746N0_THET2	965	9	3493	1.20656	1	1	100
GOTERM_MF_FAT	GO:0042242~cobyrinic acid a,c-diamide synthase activity	3	0.276753	0.834552	Q72JA0_THET2, Q746Q1_THET2, Q746N0_THET2	667	9	2095	1.04698	1	0.999999	100
GOTERM_MF_FAT	GO:0004359~glutaminase activity	3	0.276753	0.834552	Q72JA0_THET2, Q746Q1_THET2, Q746N0_THET2	667	9	2095	1.04698	1	0.999999	100
Annotation Cluster 92	Enrichment Score: 0.08922490107473154
Category	Term	Count	%	PValue	Genes	List Total	Pop Hits	Pop Total	Fold Enrichment	Bonferroni	Benjamini	FDR
GOTERM_BP_FAT	GO:0045333~cellular respiration	13	1.19926	0.624404	MDH_THET2, Q72H24_THET2, Q72GE1_THET2, Q72L91_THET2, Q72GE0_THET2, Q72JK2_THET2, Q72GZ6_THET2, Q72GD4_THET2, Q72GD9_THET2, Q72IP3_THET2, Q72HC8_THET2, CAPP_THET2, Q72H23_THET2	582	38	1772	1.0416	1	0.999738	100
GOTERM_BP_FAT	GO:0015980~energy derivation by oxidation of organic compounds	14	1.29151	0.730653	MDH_THET2, Q72H24_THET2, Q72GE1_THET2, Q72L91_THET2, Q72GE0_THET2, Q72JK2_THET2, Q72GZ6_THET2, GPDA_THET2, Q72GD4_THET2, Q72GD9_THET2, Q72IP3_THET2, Q72HC8_THET2, CAPP_THET2, Q72H23_THET2	582	44	1772	0.96876	1	0.99981	100
GOTERM_BP_FAT	GO:0009060~aerobic respiration	7	0.645756	0.77975	MDH_THET2, Q72H24_THET2, Q72JK2_THET2, Q72GZ6_THET2, Q72IP3_THET2, Q72L91_THET2, CAPP_THET2	582	22	1772	0.96876	1	0.99991	100
GOTERM_BP_FAT	GO:0009109~coenzyme catabolic process	6	0.553506	0.837684	MDH_THET2, Q72GZ6_THET2, Q72IP3_THET2, Q72L91_THET2, CAPP_THET2, Q72ID7_THET2	582	20	1772	0.913402	1	0.999952	100
GOTERM_BP_FAT	GO:0051187~cofactor catabolic process	6	0.553506	0.837684	MDH_THET2, Q72GZ6_THET2, Q72IP3_THET2, Q72L91_THET2, CAPP_THET2, Q72ID7_THET2	582	20	1772	0.913402	1	0.999952	100
SP_PIR_KEYWORDS	tricarboxylic acid cycle	3	0.276753	0.850333	MDH_THET2, Q72L91_THET2, CAPP_THET2	1084	12	4254	0.981089	1	0.985423	100
GOTERM_BP_FAT	GO:0006099~tricarboxylic acid cycle	5	0.461255	0.890789	MDH_THET2, Q72GZ6_THET2, Q72IP3_THET2, Q72L91_THET2, CAPP_THET2	582	18	1772	0.845743	1	0.999984	100
GOTERM_BP_FAT	GO:0046356~acetyl-CoA catabolic process	5	0.461255	0.890789	MDH_THET2, Q72GZ6_THET2, Q72IP3_THET2, Q72L91_THET2, CAPP_THET2	582	18	1772	0.845743	1	0.999984	100
GOTERM_BP_FAT	GO:0006084~acetyl-CoA metabolic process	5	0.461255	0.934425	MDH_THET2, Q72GZ6_THET2, Q72IP3_THET2, Q72L91_THET2, CAPP_THET2	582	20	1772	0.761168	1	0.999996	100
Annotation Cluster 93	Enrichment Score: 0.08694156282085455
Category	Term	Count	%	PValue	Genes	List Total	Pop Hits	Pop Total	Fold Enrichment	Bonferroni	Benjamini	FDR
GOTERM_BP_FAT	GO:0006575~cellular amino acid derivative metabolic process	10	0.922509	0.693848	MTNA_THET2, PANC_THET2, SPEE_THET2, PANB_THET2, Q72GB9_THET2, TRPA_THET2, Q72ID7_THET2, Q72I55_THET2, Q72HJ4_THET2, Q72K54_THET2	582	30	1772	1.01489	1	0.999735	100
GOTERM_BP_FAT	GO:0042398~cellular amino acid derivative biosynthetic process	8	0.738007	0.719582	PANC_THET2, SPEE_THET2, PANB_THET2, Q72GB9_THET2, TRPA_THET2, Q72I55_THET2, Q72HJ4_THET2, Q72K54_THET2	582	24	1772	1.01489	1	0.999792	100
GOTERM_BP_FAT	GO:0008295~spermidine biosynthetic process	3	0.276753	0.796441	SPEE_THET2, Q72I55_THET2, Q72K54_THET2	582	8	1772	1.14175	1	0.999905	100
GOTERM_BP_FAT	GO:0042401~biogenic amine biosynthetic process	6	0.553506	0.837684	SPEE_THET2, Q72GB9_THET2, TRPA_THET2, Q72I55_THET2, Q72HJ4_THET2, Q72K54_THET2	582	20	1772	0.913402	1	0.999952	100
GOTERM_BP_FAT	GO:0008216~spermidine metabolic process	3	0.276753	0.849783	SPEE_THET2, Q72I55_THET2, Q72K54_THET2	582	9	1772	1.01489	1	0.999959	100
GOTERM_BP_FAT	GO:0006576~biogenic amine metabolic process	6	0.553506	0.869545	SPEE_THET2, Q72GB9_THET2, TRPA_THET2, Q72I55_THET2, Q72HJ4_THET2, Q72K54_THET2	582	21	1772	0.869907	1	0.999973	100
GOTERM_BP_FAT	GO:0006596~polyamine biosynthetic process	3	0.276753	0.890084	SPEE_THET2, Q72I55_THET2, Q72K54_THET2	582	10	1772	0.913402	1	0.999985	100
GOTERM_BP_FAT	GO:0006595~polyamine metabolic process	3	0.276753	0.920149	SPEE_THET2, Q72I55_THET2, Q72K54_THET2	582	11	1772	0.830366	1	0.999994	100
Annotation Cluster 94	Enrichment Score: 0.08091846317360522
Category	Term	Count	%	PValue	Genes	List Total	Pop Hits	Pop Total	Fold Enrichment	Bonferroni	Benjamini	FDR
INTERPRO	IPR002559:Transposase, IS4-like	8	0.738007	0.405704	Q72GG7_THET2, Q72KZ2_THET2, Q746G3_THET2, Q745U7_THET2	965	22	3493	1.31625	1	1	99.9839
GOTERM_MF_FAT	GO:0004803~transposase activity	8	0.738007	0.987272	Q72GG7_THET2, Q72KZ2_THET2, Q746G3_THET2, Q745U7_THET2	667	40	2095	0.628186	1	1	100
GOTERM_BP_FAT	GO:0006313~transposition, DNA-mediated	8	0.738007	0.991043	Q72GG7_THET2, Q72KZ2_THET2, Q746G3_THET2, Q745U7_THET2	582	40	1772	0.608935	1	1	100
GOTERM_BP_FAT	GO:0032196~transposition	8	0.738007	0.995903	Q72GG7_THET2, Q72KZ2_THET2, Q746G3_THET2, Q745U7_THET2	582	43	1772	0.566451	1	1	100
GOTERM_BP_FAT	GO:0006310~DNA recombination	14	1.29151	0.996444	Q72G97_THET2, Q72JG9_THET2, RECA_THET2, Q72J77_THET2, Q72GG7_THET2, RUVA_THET2, Q72KZ2_THET2, Q72J86_THET2, Q746G3_THET2, RUVC_THET2, Q745U7_THET2	582	68	1772	0.626845	1	1	100
Annotation Cluster 95	Enrichment Score: 0.07296569910843985
Category	Term	Count	%	PValue	Genes	List Total	Pop Hits	Pop Total	Fold Enrichment	Bonferroni	Benjamini	FDR
GOTERM_BP_FAT	GO:0042398~cellular amino acid derivative biosynthetic process	8	0.738007	0.719582	PANC_THET2, SPEE_THET2, PANB_THET2, Q72GB9_THET2, TRPA_THET2, Q72I55_THET2, Q72HJ4_THET2, Q72K54_THET2	582	24	1772	1.01489	1	0.999792	100
GOTERM_BP_FAT	GO:0009072~aromatic amino acid family metabolic process	9	0.830258	0.785824	AROA_THET2, Q72IW1_THET2, Q72GB9_THET2, TRPA_THET2, AROC_THET2, AROE_THET2, AROK_THET2, Q72KK0_THET2, Q72HJ4_THET2	582	29	1772	0.944899	1	0.999901	100
GOTERM_BP_FAT	GO:0009073~aromatic amino acid family biosynthetic process	9	0.830258	0.785824	AROA_THET2, Q72IW1_THET2, Q72GB9_THET2, TRPA_THET2, AROC_THET2, AROE_THET2, AROK_THET2, Q72KK0_THET2, Q72HJ4_THET2	582	29	1772	0.944899	1	0.999901	100
GOTERM_BP_FAT	GO:0046417~chorismate metabolic process	9	0.830258	0.785824	AROA_THET2, Q72IW1_THET2, Q72GB9_THET2, TRPA_THET2, AROC_THET2, AROE_THET2, AROK_THET2, Q72KK0_THET2, Q72HJ4_THET2	582	29	1772	0.944899	1	0.999901	100
GOTERM_BP_FAT	GO:0042401~biogenic amine biosynthetic process	6	0.553506	0.837684	SPEE_THET2, Q72GB9_THET2, TRPA_THET2, Q72I55_THET2, Q72HJ4_THET2, Q72K54_THET2	582	20	1772	0.913402	1	0.999952	100
GOTERM_BP_FAT	GO:0006576~biogenic amine metabolic process	6	0.553506	0.869545	SPEE_THET2, Q72GB9_THET2, TRPA_THET2, Q72I55_THET2, Q72HJ4_THET2, Q72K54_THET2	582	21	1772	0.869907	1	0.999973	100
GOTERM_BP_FAT	GO:0042435~indole derivative biosynthetic process	3	0.276753	0.890084	Q72GB9_THET2, TRPA_THET2, Q72HJ4_THET2	582	10	1772	0.913402	1	0.999985	100
GOTERM_BP_FAT	GO:0042434~indole derivative metabolic process	3	0.276753	0.890084	Q72GB9_THET2, TRPA_THET2, Q72HJ4_THET2	582	10	1772	0.913402	1	0.999985	100
GOTERM_BP_FAT	GO:0042430~indole and derivative metabolic process	3	0.276753	0.890084	Q72GB9_THET2, TRPA_THET2, Q72HJ4_THET2	582	10	1772	0.913402	1	0.999985	100
GOTERM_BP_FAT	GO:0006586~indolalkylamine metabolic process	3	0.276753	0.890084	Q72GB9_THET2, TRPA_THET2, Q72HJ4_THET2	582	10	1772	0.913402	1	0.999985	100
GOTERM_BP_FAT	GO:0006568~tryptophan metabolic process	3	0.276753	0.890084	Q72GB9_THET2, TRPA_THET2, Q72HJ4_THET2	582	10	1772	0.913402	1	0.999985	100
GOTERM_BP_FAT	GO:0000162~tryptophan biosynthetic process	3	0.276753	0.890084	Q72GB9_THET2, TRPA_THET2, Q72HJ4_THET2	582	10	1772	0.913402	1	0.999985	100
GOTERM_BP_FAT	GO:0046219~indolalkylamine biosynthetic process	3	0.276753	0.890084	Q72GB9_THET2, TRPA_THET2, Q72HJ4_THET2	582	10	1772	0.913402	1	0.999985	100
Annotation Cluster 96	Enrichment Score: 0.06800888954703711
Category	Term	Count	%	PValue	Genes	List Total	Pop Hits	Pop Total	Fold Enrichment	Bonferroni	Benjamini	FDR
SP_PIR_KEYWORDS	cell inner membrane	8	0.738007	0.673685	SECA_THET2, NUOI_THET2, COXX_THET2, UPPP_THET2, NUOC_THET2, NUOD_THET2, CCME_THET2, MURG_THET2	1084	30	4254	1.04649	1	0.947638	99.9999
GOTERM_BP_FAT	GO:0019684~photosynthesis, light reaction	3	0.276753	0.849783	NUOI_THET2, NUOC_THET2, NUOD_THET2	582	9	1772	1.01489	1	0.999959	100
GOTERM_BP_FAT	GO:0015979~photosynthesis	4	0.369004	0.852976	NUOI_THET2, NUOC_THET2, NUOD_THET2, Q72GR3_THET2	582	13	1772	0.936823	1	0.999957	100
SP_PIR_KEYWORDS	quinone	4	0.369004	0.945173	NUOI_THET2, Q72GC8_THET2, NUOC_THET2, NUOD_THET2	1084	22	4254	0.713519	1	0.997759	100
GOTERM_MF_FAT	GO:0048038~quinone binding	4	0.369004	0.990245	NUOI_THET2, Q72GC8_THET2, NUOC_THET2, NUOD_THET2	667	23	2095	0.546249	1	1	100
Annotation Cluster 97	Enrichment Score: 0.06744460456855393
Category	Term	Count	%	PValue	Genes	List Total	Pop Hits	Pop Total	Fold Enrichment	Bonferroni	Benjamini	FDR
SP_PIR_KEYWORDS	cell inner membrane	8	0.738007	0.673685	SECA_THET2, NUOI_THET2, COXX_THET2, UPPP_THET2, NUOC_THET2, NUOD_THET2, CCME_THET2, MURG_THET2	1084	30	4254	1.04649	1	0.947638	99.9999
GOTERM_CC_FAT	GO:0009898~internal side of plasma membrane	3	0.276753	0.965172	SECA_THET2, NUOC_THET2, NUOD_THET2	169	13	499	0.681384	1	0.99997	100
GOTERM_CC_FAT	GO:0044459~plasma membrane part	3	0.276753	0.965172	SECA_THET2, NUOC_THET2, NUOD_THET2	169	13	499	0.681384	1	0.99997	100
Annotation Cluster 98	Enrichment Score: 0.06684733185043741
Category	Term	Count	%	PValue	Genes	List Total	Pop Hits	Pop Total	Fold Enrichment	Bonferroni	Benjamini	FDR
SP_PIR_KEYWORDS	pyrimidine biosynthesis	4	0.369004	0.681437	PYRE_THET2, CARB_THET2, PYRF_THET2, CARA_THET2	1084	13	4254	1.20749	1	0.948751	99.9999
GOTERM_BP_FAT	GO:0006220~pyrimidine nucleotide metabolic process	5	0.461255	0.949691	PYRE_THET2, KCY_THET2, CARB_THET2, PYRF_THET2, CARA_THET2	582	21	1772	0.724922	1	0.999998	100
GOTERM_BP_FAT	GO:0006221~pyrimidine nucleotide biosynthetic process	4	0.369004	0.973757	PYRE_THET2, CARB_THET2, PYRF_THET2, CARA_THET2	582	19	1772	0.640984	1	1	100
Annotation Cluster 99	Enrichment Score: 0.06658518783281044
Category	Term	Count	%	PValue	Genes	List Total	Pop Hits	Pop Total	Fold Enrichment	Bonferroni	Benjamini	FDR
SP_PIR_KEYWORDS	transmembrane	47	4.33579	0.668757	UPPP_THET2, Q72LI4_THET2, Q72JA5_THET2, Q72HW1_THET2, Q72IA4_THET2, Q72GW2_THET2, Q72IY3_THET2, Q72J44_THET2, Q72JG2_THET2, Q72KV0_THET2, Q72JZ3_THET2, Q72HC8_THET2, Q72KF0_THET2, CCME_THET2, Q72HI2_THET2, Q72KF9_THET2, Q72HK5_THET2, Q72H24_THET2, Q72GE1_THET2, Q72G87_THET2, Q72I67_THET2, Q72IM4_THET2, Q72JK2_THET2, Q72KS3_THET2, Q72L43_THET2, Q72HI3_THET2, Q72GC8_THET2, Q72G86_THET2, Q72GE0_THET…	1084	189	4254	0.975898	1	0.947748	99.9999
SP_PIR_KEYWORDS	transport	40	3.69004	0.705256	SECA_THET2, Q72G86_THET2, NUOC_THET2, Q72IW4_THET2, Q72JA5_THET2, Q72I66_THET2, Q72GW2_THET2, Q72L36_THET2, Q72J44_THET2, Q72JG2_THET2, Q72I62_THET2, Q72KV0_THET2, Q72KF0_THET2, Q72HC8_THET2, Q72HI2_THET2, Q72H23_THET2, Q72H24_THET2, Q72KP1_THET2, Q72KH1_THET2, VATB_THET2, VATA_THET2, Q72G87_THET2, Q72JA4_THET2, VATE_THET2, Q72I67_THET2, Q72IM4_THET2, VATC_THET2, Q72L52_THET2, VATD_THET2, Q72K84_…	1084	163	4254	0.963032	1	0.95245	100
SP_PIR_KEYWORDS	membrane	39	3.59779	0.840288	SECA_THET2, UPPP_THET2, NUOC_THET2, Q72G86_THET2, Q72LI4_THET2, Q72JA5_THET2, Q72IA4_THET2, Q72GW2_THET2, Q72IY3_THET2, Q72J44_THET2, NUOI_THET2, Q72JG2_THET2, Q72I62_THET2, Q72KV0_THET2, Q72JZ3_THET2, Q72KF0_THET2, Q72HI2_THET2, CCME_THET2, Q72IJ3_THET2, Q72HK5_THET2, Q72KH1_THET2, Q72G87_THET2, Q72JA4_THET2, Y686_THET2, Q72GS3_THET2, Q72L34_THET2, Q72I67_THET2, COXX_THET2, Q72HG2_THET2, Q72J13_…	1084	169	4254	0.90562	1	0.983964	100
SP_PIR_KEYWORDS	cell membrane	38	3.50554	0.862857	SECA_THET2, UPPP_THET2, NUOC_THET2, Q72G86_THET2, Q72LI4_THET2, Q72JA5_THET2, Q72GW2_THET2, Q72J44_THET2, NUOI_THET2, Q72J80_THET2, Q72JG2_THET2, Q72I62_THET2, Q72L96_THET2, Q72KV0_THET2, Q72KF0_THET2, Q72HI2_THET2, CCME_THET2, Q72HK5_THET2, Q72KH1_THET2, Q72G87_THET2, Q72JA4_THET2, Y686_THET2, Q72GS3_THET2, Q72L34_THET2, Q72I67_THET2, COXX_THET2, Q72HG2_THET2, Q72J13_THET2, Q72GR6_THET2, Q72GX4_…	1084	167	4254	0.892967	1	0.987359	100
GOTERM_CC_FAT	GO:0016021~integral to membrane	73	6.73432	0.999913	Q72GX6_THET2, UPPP_THET2, Q72GS0_THET2, Q72LI4_THET2, Q746P8_THET2, Q72HW1_THET2, Q72JA5_THET2, Q72IM2_THET2, Q72IA4_THET2, Q72GW2_THET2, Q746N4_THET2, Q72JF5_THET2, Q72J44_THET2, Q72IY3_THET2, Q72JG2_THET2, Q72J05_THET2, Q72KV0_THET2, Q72JZ3_THET2, Q72GQ7_THET2, Q72HC8_THET2, Q72KF0_THET2, Q72H92_THET2, CCME_THET2, Q72HI2_THET2, Q72KF9_THET2, Q72HK5_THET2, Q72HN9_THET2, Q72H24_THET2, Q72GE1_THET…	169	271	499	0.795367	1	1	100
GOTERM_CC_FAT	GO:0031224~intrinsic to membrane	73	6.73432	0.999913	Q72GX6_THET2, UPPP_THET2, Q72GS0_THET2, Q72LI4_THET2, Q746P8_THET2, Q72HW1_THET2, Q72JA5_THET2, Q72IM2_THET2, Q72IA4_THET2, Q72GW2_THET2, Q746N4_THET2, Q72JF5_THET2, Q72J44_THET2, Q72IY3_THET2, Q72JG2_THET2, Q72J05_THET2, Q72KV0_THET2, Q72JZ3_THET2, Q72GQ7_THET2, Q72HC8_THET2, Q72KF0_THET2, Q72H92_THET2, CCME_THET2, Q72HI2_THET2, Q72KF9_THET2, Q72HK5_THET2, Q72HN9_THET2, Q72H24_THET2, Q72GE1_THET…	169	271	499	0.795367	1	1	100
GOTERM_CC_FAT	GO:0005886~plasma membrane	37	3.41328	0.999992	SECA_THET2, Q72GX6_THET2, UPPP_THET2, NUOC_THET2, Q746P8_THET2, Q72LI4_THET2, Q72JA5_THET2, Q72HW1_THET2, Q72GW2_THET2, Q72J44_THET2, NUOI_THET2, Q72I62_THET2, Q72KV0_THET2, Q72KK9_THET2, Q72KF0_THET2, Q72HI2_THET2, CCME_THET2, Q72HK5_THET2, Q72H24_THET2, Q72KH1_THET2, Q72JA4_THET2, Y686_THET2, Q72GS3_THET2, Q72I67_THET2, Q72LP0_THET2, COXX_THET2, Q72HG2_THET2, Q72J13_THET2, Q72GX4_THET2, NUOD_TH…	169	168	499	0.650289	1	1	100
Annotation Cluster 100	Enrichment Score: 0.04984895493611056
Category	Term	Count	%	PValue	Genes	List Total	Pop Hits	Pop Total	Fold Enrichment	Bonferroni	Benjamini	FDR
GOTERM_MF_FAT	GO:0015103~inorganic anion transmembrane transporter activity	4	0.369004	0.788478	Q72HN9_THET2, Q72KH1_THET2, Q72GX4_THET2, Q72KH0_THET2	667	12	2095	1.04698	1	0.999997	100
GOTERM_MF_FAT	GO:0008509~anion transmembrane transporter activity	5	0.461255	0.840352	Q72HN9_THET2, Q72KH1_THET2, Q72GX4_THET2, Q72L34_THET2, Q72KH0_THET2	667	17	2095	0.923803	1	1	100
GOTERM_BP_FAT	GO:0006820~anion transport	6	0.553506	0.969561	Q72HN9_THET2, Q72KH1_THET2, Q72GX4_THET2, Q72L34_THET2, Q72I74_THET2, Q72KH0_THET2	582	27	1772	0.676594	1	1	100
GOTERM_BP_FAT	GO:0015698~inorganic anion transport	5	0.461255	0.98351	Q72KH1_THET2, Q72GX4_THET2, Q72L34_THET2, Q72I74_THET2, Q72KH0_THET2	582	25	1772	0.608935	1	1	100
Annotation Cluster 101	Enrichment Score: 0.042967940194171494
Category	Term	Count	%	PValue	Genes	List Total	Pop Hits	Pop Total	Fold Enrichment	Bonferroni	Benjamini	FDR
PIR_SUPERFAMILY	PIRSF031673:uncharacterized conserved protein	4	0.369004	0.828069	Q72JB1_THET2, Q72GG1_THET2, Q72HY3_THET2, Q72JB0_THET2	677	13	2150	0.977162	1	1	100
INTERPRO	IPR012296:Nuclease, putative, TT1808	5	0.461255	0.930775	Q72JB1_THET2, Q72JB6_THET2, Q72GG1_THET2, Q72HY3_THET2, Q72JB0_THET2	965	24	3493	0.754102	1	1	100
INTERPRO	IPR008538:Protein of unknown function DUF820	6	0.553506	0.96424	Q72JB1_THET2, Q72JB6_THET2, Q72IQ4_THET2, Q72GG1_THET2, Q72HY3_THET2, Q72JB0_THET2	965	32	3493	0.678692	1	1	100
Annotation Cluster 102	Enrichment Score: 0.04193812961612371
Category	Term	Count	%	PValue	Genes	List Total	Pop Hits	Pop Total	Fold Enrichment	Bonferroni	Benjamini	FDR
GOTERM_BP_FAT	GO:0008653~lipopolysaccharide metabolic process	3	0.276753	0.849783	Q72KZ1_THET2, FABZ_THET2, Q72J33_THET2	582	9	1772	1.01489	1	0.999959	100
GOTERM_BP_FAT	GO:0009103~lipopolysaccharide biosynthetic process	3	0.276753	0.849783	Q72KZ1_THET2, FABZ_THET2, Q72J33_THET2	582	9	1772	1.01489	1	0.999959	100
GOTERM_BP_FAT	GO:0034637~cellular carbohydrate biosynthetic process	9	0.830258	0.92987	Q72K29_THET2, TPIS_THET2, GPDA_THET2, Q72KV4_THET2, Q72KZ1_THET2, MURG_THET2, FABZ_THET2, Q72J33_THET2, Q72K30_THET2	582	35	1772	0.782916	1	0.999996	100
GOTERM_BP_FAT	GO:0033692~cellular polysaccharide biosynthetic process	3	0.276753	0.958596	Q72KZ1_THET2, FABZ_THET2, Q72J33_THET2	582	13	1772	0.702617	1	0.999999	100
GOTERM_BP_FAT	GO:0044264~cellular polysaccharide metabolic process	3	0.276753	0.958596	Q72KZ1_THET2, FABZ_THET2, Q72J33_THET2	582	13	1772	0.702617	1	0.999999	100
Annotation Cluster 103	Enrichment Score: 0.03831132262055824
Category	Term	Count	%	PValue	Genes	List Total	Pop Hits	Pop Total	Fold Enrichment	Bonferroni	Benjamini	FDR
SP_PIR_KEYWORDS	two-component regulatory system	7	0.645756	0.682829	Q72IY4_THET2, Q72KV3_THET2, Q72GJ8_THET2, Q72IA4_THET2, Q72IJ3_THET2, Q72GJ9_THET2, Q72G70_THET2, Q72IY3_THET2	1084	26	4254	1.05656	1	0.947217	99.9999
GOTERM_BP_FAT	GO:0000160~two-component signal transduction system (phosphorelay)	12	1.10701	0.930992	Q72IA4_THET2, Q72JF5_THET2, Q72G70_THET2, Q72IY3_THET2, Q72LA1_THET2, Q72JY5_THET2, Q72JY9_THET2, Q72JJ5_THET2, Q72IY4_THET2, Q72KV3_THET2, Q72GJ8_THET2, Q72IJ3_THET2, Q72GJ9_THET2	582	46	1772	0.794263	1	0.999996	100
INTERPRO	IPR001867:Signal transduction response regulator, C-terminal	3	0.276753	0.931465	Q72IY4_THET2, Q72GJ8_THET2, Q72GJ9_THET2, Q72G70_THET2	965	14	3493	0.775648	1	1	100
COG_ONTOLOGY	Signal transduction mechanisms / Transcription	4	0.369004	0.940008	Q72IY4_THET2, Q72HX7_THET2, Q72GJ8_THET2, Q72GJ9_THET2, Q72G70_THET2	187	21	718	0.731347	1	0.999209	100
SMART	SM00448:REC	5	0.461255	0.957472	Q72JY5_THET2, Q72IY4_THET2, Q72JJ5_THET2, Q72GJ8_THET2, Q72GJ9_THET2, Q72G70_THET2	143	28	552	0.689311	1	0.999999	100
PIR_SUPERFAMILY	PIRSF003173:response regulator, OmpR type	3	0.276753	0.962836	Q72IY4_THET2, Q72GJ8_THET2, Q72GJ9_THET2, Q72G70_THET2	677	14	2150	0.680523	1	1	100
INTERPRO	IPR001789:Signal transduction response regulator, receiver region	5	0.461255	0.971128	Q72JY5_THET2, Q72IY4_THET2, Q72JJ5_THET2, Q72GJ8_THET2, Q72GJ9_THET2, Q72G70_THET2	965	28	3493	0.646373	1	1	100
GOTERM_MF_FAT	GO:0000156~two-component response regulator activity	5	0.461255	0.99083	Q72JY5_THET2, Q72IY4_THET2, Q72JJ5_THET2, Q72GJ8_THET2, Q72GJ9_THET2, Q72G70_THET2	667	28	2095	0.56088	1	1	100
Annotation Cluster 104	Enrichment Score: 0.03596265760559294
Category	Term	Count	%	PValue	Genes	List Total	Pop Hits	Pop Total	Fold Enrichment	Bonferroni	Benjamini	FDR
COG_ONTOLOGY	Lipid metabolism	9	0.830258	0.757267	Q72GR1_THET2, Q72HC0_THET2, Q72GT0_THET2, ISPE_THET2, Q72GZ8_THET2, Q72IE0_THET2, Q72L25_THET2, Q72GU9_THET2, Q72HE1_THET2	187	36	718	0.959893	1	0.985698	99.9996
PIR_SUPERFAMILY	PIRSF000182:acyl-CoA dehydrogenase	3	0.276753	0.905511	Q72HC0_THET2, Q72L25_THET2, Q72HE1_THET2	677	11	2150	0.866121	1	1	100
INTERPRO	IPR013786:Acyl-CoA dehydrogenase/oxidase, N-terminal	3	0.276753	0.910943	Q72HC0_THET2, Q72L25_THET2, Q72HE1_THET2	965	13	3493	0.835313	1	1	100
INTERPRO	IPR006092:Acyl-CoA dehydrogenase, N-terminal	3	0.276753	0.910943	Q72HC0_THET2, Q72L25_THET2, Q72HE1_THET2	965	13	3493	0.835313	1	1	100
INTERPRO	IPR006089:Acyl-CoA dehydrogenase, conserved site	3	0.276753	0.931465	Q72HC0_THET2, Q72L25_THET2, Q72HE1_THET2	965	14	3493	0.775648	1	1	100
INTERPRO	IPR006090:Acyl-CoA oxidase/dehydrogenase, type 1	3	0.276753	0.947455	Q72HC0_THET2, Q72L25_THET2, Q72HE1_THET2	965	15	3493	0.723938	1	1	100
INTERPRO	IPR013764:Acyl-CoA oxidase/dehydrogenase, type1/2, C-terminal	3	0.276753	0.976758	Q72HC0_THET2, Q72L25_THET2, Q72HE1_THET2	965	18	3493	0.603282	1	1	100
INTERPRO	IPR006091:Acyl-CoA oxidase/dehydrogenase, central region	3	0.276753	0.976758	Q72HC0_THET2, Q72L25_THET2, Q72HE1_THET2	965	18	3493	0.603282	1	1	100
GOTERM_MF_FAT	GO:0003995~acyl-CoA dehydrogenase activity	3	0.276753	0.990632	Q72HC0_THET2, Q72L25_THET2, Q72HE1_THET2	667	18	2095	0.523488	1	1	100
Annotation Cluster 105	Enrichment Score: 0.03530176071668965
Category	Term	Count	%	PValue	Genes	List Total	Pop Hits	Pop Total	Fold Enrichment	Bonferroni	Benjamini	FDR
SMART	SM00729:Elp3	5	0.461255	0.904492	LIPA_THET2, RLMN_THET2, Q72I78_THET2, RIMO_THET2, Q72KR6_THET2	143	24	552	0.804196	1	0.999998	100
INTERPRO	IPR007197:Radical SAM	5	0.461255	0.930775	LIPA_THET2, RLMN_THET2, Q72I78_THET2, RIMO_THET2, Q72KR6_THET2	965	24	3493	0.754102	1	1	100
INTERPRO	IPR006638:Elongator protein 3/MiaB/NifB	5	0.461255	0.930775	LIPA_THET2, RLMN_THET2, Q72I78_THET2, RIMO_THET2, Q72KR6_THET2	965	24	3493	0.754102	1	1	100
Annotation Cluster 106	Enrichment Score: 0.03443693012528202
Category	Term	Count	%	PValue	Genes	List Total	Pop Hits	Pop Total	Fold Enrichment	Bonferroni	Benjamini	FDR
INTERPRO	IPR002198:Short-chain dehydrogenase/reductase SDR	8	0.738007	0.888177	Q72LN2_THET2, Q72LL2_THET2, Q72JA9_THET2, Q72KU7_THET2, Q72KW9_THET2, Q72L28_THET2, Q72GI7_THET2, Q72H17_THET2	965	35	3493	0.827358	1	1	100
INTERPRO	IPR002347:Glucose/ribitol dehydrogenase	7	0.645756	0.92643	Q72LL2_THET2, Q72JA9_THET2, Q72KU7_THET2, Q72KW9_THET2, Q72L28_THET2, Q72GI7_THET2, Q72H17_THET2	965	33	3493	0.767813	1	1	100
PIR_SUPERFAMILY	PIRSF000092:short-chain dehydrogenase	6	0.553506	0.958025	Q72LN2_THET2, Q72LL2_THET2, Q72JA9_THET2, Q72KU7_THET2, Q72KW9_THET2, Q72L28_THET2	677	27	2150	0.705728	1	1	100
Annotation Cluster 107	Enrichment Score: 0.034211004340720885
Category	Term	Count	%	PValue	Genes	List Total	Pop Hits	Pop Total	Fold Enrichment	Bonferroni	Benjamini	FDR
GOTERM_MF_FAT	GO:0016407~acetyltransferase activity	10	0.922509	0.770129	ARGJ_THET2, Q72GY5_THET2, Q72GP6_THET2, Q72KX0_THET2, Q72IC2_THET2, Q72L72_THET2, Q72KC8_THET2, Q72GH3_THET2, Q72G93_THET2, Q72GU4_THET2	667	33	2095	0.951797	1	0.999996	100
INTERPRO	IPR016181:Acyl-CoA N-acyltransferase	5	0.461255	0.930775	Q72JN2_THET2, Q72GY5_THET2, Q72IC2_THET2, Q72KC8_THET2, Q72G93_THET2	965	24	3493	0.754102	1	1	100
INTERPRO	IPR000182:GCN5-related N-acetyltransferase	4	0.369004	0.965139	Q72GY5_THET2, Q72IC2_THET2, Q72KC8_THET2, Q72G93_THET2	965	22	3493	0.658125	1	1	100
GOTERM_MF_FAT	GO:0008080~N-acetyltransferase activity	5	0.461255	0.983893	ARGJ_THET2, Q72GY5_THET2, Q72IC2_THET2, Q72KC8_THET2, Q72G93_THET2	667	26	2095	0.604025	1	1	100
GOTERM_MF_FAT	GO:0016410~N-acyltransferase activity	5	0.461255	0.99083	ARGJ_THET2, Q72GY5_THET2, Q72IC2_THET2, Q72KC8_THET2, Q72G93_THET2	667	28	2095	0.56088	1	1	100
Annotation Cluster 108	Enrichment Score: 0.024895328262121784
Category	Term	Count	%	PValue	Genes	List Total	Pop Hits	Pop Total	Fold Enrichment	Bonferroni	Benjamini	FDR
INTERPRO	IPR003088:Cytochrome c, class I	4	0.369004	0.860702	Q72HC5_THET2, Q72IU7_THET2, Q72H23_THET2, Q72IS4_THET2	965	16	3493	0.904922	1	1	100
GOTERM_MF_FAT	GO:0046906~tetrapyrrole binding	12	1.10701	0.955313	Q72H24_THET2, Q72JK2_THET2, Q72HC5_THET2, Q72J97_THET2, Q746J6_THET2, Q72KM0_THET2, Q72IU7_THET2, Q72H23_THET2, Q72JU2_THET2, Q72JU1_THET2, Q746J7_THET2, Q72IS4_THET2	667	50	2095	0.753823	1	1	100
GOTERM_MF_FAT	GO:0020037~heme binding	8	0.738007	0.979596	Q72H24_THET2, Q72JK2_THET2, Q72HC5_THET2, Q746J6_THET2, Q72KM0_THET2, Q72IU7_THET2, Q72H23_THET2, Q72IS4_THET2	667	38	2095	0.661248	1	1	100
INTERPRO	IPR009056:Cytochrome c, monohaem	4	0.369004	0.987127	Q72HC5_THET2, Q72IU7_THET2, Q72H23_THET2, Q72IS4_THET2	965	26	3493	0.556875	1	1	100
Annotation Cluster 109	Enrichment Score: 0.02472937400406983
Category	Term	Count	%	PValue	Genes	List Total	Pop Hits	Pop Total	Fold Enrichment	Bonferroni	Benjamini	FDR
INTERPRO	IPR015467:Thioredoxin, core	3	0.276753	0.809937	Q72HU9_THET2, Q72IL5_THET2, Q72KI7_THET2	965	10	3493	1.08591	1	1	100
GOTERM_MF_FAT	GO:0016667~oxidoreductase activity, acting on sulfur group of donors	6	0.553506	0.921113	Q72HU9_THET2, Q72HD8_THET2, Q72KL2_THET2, Q72JC5_THET2, Q72IL5_THET2, Q72L19_THET2	667	24	2095	0.785232	1	1	100
GOTERM_MF_FAT	GO:0015036~disulfide oxidoreductase activity	3	0.276753	0.933674	Q72HU9_THET2, Q72IL5_THET2, Q72L19_THET2	667	12	2095	0.785232	1	1	100
GOTERM_MF_FAT	GO:0015035~protein disulfide oxidoreductase activity	3	0.276753	0.933674	Q72HU9_THET2, Q72IL5_THET2, Q72L19_THET2	667	12	2095	0.785232	1	1	100
INTERPRO	IPR012335:Thioredoxin fold	7	0.645756	0.949251	Q72HU9_THET2, Q72KI9_THET2, Q72JZ6_THET2, Q72IL5_THET2, Q72GD2_THET2, Q72L19_THET2, Q72KI7_THET2	965	35	3493	0.723938	1	1	100
INTERPRO	IPR017936:Thioredoxin-like	4	0.369004	0.978691	Q72HU9_THET2, Q72IL5_THET2, Q72L19_THET2, Q72KI7_THET2	965	24	3493	0.603282	1	1	100
GOTERM_BP_FAT	GO:0045454~cell redox homeostasis	6	0.553506	0.995583	Q72HU9_THET2, Q72JI3_THET2, Q72HK3_THET2, Q72IL5_THET2, Q72L19_THET2, Q72KI7_THET2	582	34	1772	0.537295	1	1	100
GOTERM_BP_FAT	GO:0042592~homeostatic process	7	0.645756	0.997159	Q72HU9_THET2, Q72JI3_THET2, Q72HK3_THET2, Q72IL5_THET2, LUXS_THET2, Q72L19_THET2, Q72KI7_THET2	582	40	1772	0.532818	1	1	100
GOTERM_BP_FAT	GO:0019725~cellular homeostasis	6	0.553506	0.998648	Q72HU9_THET2, Q72JI3_THET2, Q72HK3_THET2, Q72IL5_THET2, Q72L19_THET2, Q72KI7_THET2	582	38	1772	0.480738	1	1	100
Annotation Cluster 110	Enrichment Score: 0.024442376931769226
Category	Term	Count	%	PValue	Genes	List Total	Pop Hits	Pop Total	Fold Enrichment	Bonferroni	Benjamini	FDR
GOTERM_BP_FAT	GO:0034637~cellular carbohydrate biosynthetic process	9	0.830258	0.92987	Q72K29_THET2, TPIS_THET2, GPDA_THET2, Q72KV4_THET2, Q72KZ1_THET2, MURG_THET2, FABZ_THET2, Q72J33_THET2, Q72K30_THET2	582	35	1772	0.782916	1	0.999996	100
GOTERM_BP_FAT	GO:0046165~alcohol biosynthetic process	4	0.369004	0.936047	TPIS_THET2, GPDA_THET2, Q72KV4_THET2, MURG_THET2	582	16	1772	0.761168	1	0.999997	100
GOTERM_BP_FAT	GO:0046364~monosaccharide biosynthetic process	3	0.276753	0.970405	TPIS_THET2, Q72KV4_THET2, MURG_THET2	582	14	1772	0.65243	1	1	100
Annotation Cluster 111	Enrichment Score: 0.024059555966163812
Category	Term	Count	%	PValue	Genes	List Total	Pop Hits	Pop Total	Fold Enrichment	Bonferroni	Benjamini	FDR
SP_PIR_KEYWORDS	Protease	13	1.19926	0.82077	Q72KH9_THET2, Q72IK2_THET2, Q72J25_THET2, Q72I26_THET2, Q72GW9_THET2, Q72GE3_THET2, Q72IX7_THET2, Q72L01_THET2, Q72IX8_THET2, Q72L86_THET2, Q72J50_THET2, Q72J79_THET2, Q72KS5_THET2	1084	57	4254	0.895028	1	0.980166	100
GOTERM_MF_FAT	GO:0008237~metallopeptidase activity	15	1.38376	0.923973	Q72IK4_THET2, Q72KH9_THET2, LYSK_THET2, Q72LC6_THET2, Q72IG4_THET2, Q72I26_THET2, Q72GW9_THET2, Q72IZ5_THET2, Q72GY3_THET2, Q72JR3_THET2, Q72H05_THET2, Q72HI6_THET2, Q72JR5_THET2, Q72J31_THET2, Q72LM3_THET2, Q72J79_THET2	667	58	2095	0.812309	1	1	100
GOTERM_MF_FAT	GO:0004222~metalloendopeptidase activity	7	0.645756	0.949937	Q72IK4_THET2, Q72JR3_THET2, Q72KH9_THET2, Q72IG4_THET2, Q72HI6_THET2, Q72LM3_THET2, Q72J31_THET2, Q72J79_THET2	667	30	2095	0.732884	1	1	100
GOTERM_BP_FAT	GO:0006508~proteolysis	25	2.30627	0.974285	Q72IK4_THET2, LYSK_THET2, Q72LC6_THET2, Q72IG4_THET2, Q72I26_THET2, Q72J25_THET2, Q72IZ5_THET2, Q72GY3_THET2, Q72JR3_THET2, Q72H05_THET2, Q72GE3_THET2, Q72GA0_THET2, Q72J50_THET2, Q72LM3_THET2, Q72J79_THET2, Q72KS5_THET2, Q72KH9_THET2, Q72IK2_THET2, Q72HM9_THET2, Q72GW9_THET2, Q72HI6_THET2, Q72IX8_THET2, Q72JR5_THET2, Q72J31_THET2, Q72HF8_THET2, Q72JI4_THET2	582	98	1772	0.776702	1	1	100
GOTERM_MF_FAT	GO:0070011~peptidase activity, acting on L-amino acid peptides	25	2.30627	0.982704	Q72IK4_THET2, LYSK_THET2, Q72LC6_THET2, Q72IG4_THET2, Q72I26_THET2, Q72J25_THET2, Q72IZ5_THET2, Q72GY3_THET2, Q72JR3_THET2, Q72H05_THET2, Q72GE3_THET2, Q72GA0_THET2, Q72L01_THET2, Q72J50_THET2, Q72LM3_THET2, Q72J79_THET2, Q72KS5_THET2, Q72KH9_THET2, Q72HM9_THET2, Q72GW9_THET2, Q72HI6_THET2, Q72IX8_THET2, Q72JR5_THET2, Q72J31_THET2, Q72HF8_THET2, Q72JI4_THET2	667	104	2095	0.755031	1	1	100
GOTERM_MF_FAT	GO:0008233~peptidase activity	28	2.58303	0.987338	Q72IK4_THET2, LYSK_THET2, Q72LC6_THET2, Q72IG4_THET2, Q72J25_THET2, Q72I26_THET2, Q72IZ5_THET2, Q72GY3_THET2, Q72JR3_THET2, Q72H05_THET2, Q72GA0_THET2, Q72GE3_THET2, Q72L01_THET2, Q72J50_THET2, Q72LM3_THET2, Q72KS5_THET2, Q72J79_THET2, Q72KH9_THET2, Q72HM9_THET2, Q72IK2_THET2, Q72GW9_THET2, Q72IX7_THET2, Q72HI6_THET2, Q72IX8_THET2, Q72JR5_THET2, Q72L86_THET2, Q72HF8_THET2, Q72J31_THET2, Q72JI4_TH…	667	117	2095	0.751675	1	1	100
GOTERM_MF_FAT	GO:0004175~endopeptidase activity	11	1.01476	0.996398	Q72IK4_THET2, Q72JR3_THET2, Q72KH9_THET2, Q72GA0_THET2, Q72GE3_THET2, Q72IG4_THET2, Q72HI6_THET2, Q72J25_THET2, Q72LM3_THET2, Q72J31_THET2, Q72J79_THET2, Q72KS5_THET2	667	58	2095	0.595694	1	1	100
Annotation Cluster 112	Enrichment Score: 0.023485452048633674
Category	Term	Count	%	PValue	Genes	List Total	Pop Hits	Pop Total	Fold Enrichment	Bonferroni	Benjamini	FDR
SP_PIR_KEYWORDS	dna-binding	25	2.30627	0.798285	RECA_THET2, Q72GV7_THET2, RUVA_THET2, Q72JY0_THET2, FPG_THET2, Q72L08_THET2, Q72I50_THET2, Q72GW8_THET2, Q72L24_THET2, Q72K09_THET2, Q72ID0_THET2, Q746J7_THET2, Q72GX7_THET2, Q72L87_THET2, Q72GB7_THET2, ARGR_THET2, Q72IQ7_THET2, Q72IY7_THET2, Q72H56_THET2, Q72IS0_THET2, Q72IB7_THET2, Q72GP8_THET2, Q72LC7_THET2, Q72JI1_THET2, REX_THET2, NRDR_THET2, Q72GM9_THET2	1084	107	4254	0.916905	1	0.976296	100
GOTERM_MF_FAT	GO:0003700~transcription factor activity	19	1.75277	0.955668	Q72KG4_THET2, SYN_THET2, ARGR_THET2, Q72JH4_THET2, Q72KB4_THET2, Q72K75_THET2, Q72IY7_THET2, Q72H56_THET2, Q72GN0_THET2, Q72GW8_THET2, Q72IB7_THET2, Q72L24_THET2, Q72GP8_THET2, Q72LC7_THET2, Q72K09_THET2, Q72JI1_THET2, REX_THET2, Q72ID0_THET2, Q72KW6_THET2, Q746J7_THET2, Q72GM9_THET2	667	76	2095	0.785232	1	1	100
GOTERM_MF_FAT	GO:0030528~transcription regulator activity	29	2.67528	0.956858	COAX_THET2, Q72K75_THET2, Q72G70_THET2, Q72JY5_THET2, Q72L08_THET2, Q72GN0_THET2, Q72GW8_THET2, Q72JJ5_THET2, Q72IY4_THET2, Q72L24_THET2, Q72K09_THET2, Q72GJ8_THET2, Q72ID0_THET2, Q72GJ9_THET2, Q746J7_THET2, NUSB_THET2, Q72KG4_THET2, SYN_THET2, ARGR_THET2, Q72JH4_THET2, Q72KB4_THET2, Q72IY7_THET2, Q72H56_THET2, Q72IB7_THET2, Q72GP8_THET2, Q72LC7_THET2, Q72JI1_THET2, REX_THET2, Q72KW6_THET2, NRDR_…	667	112	2095	0.813276	1	1	100
SP_PIR_KEYWORDS	transcription regulation	13	1.19926	0.959233	NUSB_THET2, Q72KG4_THET2, ARGR_THET2, Q72IY7_THET2, Q72L08_THET2, Q72IB7_THET2, Q72L24_THET2, Q72GP8_THET2, Q72K09_THET2, REX_THET2, Q72ID0_THET2, NRDR_THET2, Q72GM9_THET2, Q72GW1_THET2	1084	69	4254	0.739371	1	0.998704	100
GOTERM_BP_FAT	GO:0045449~regulation of transcription	36	3.32103	0.991898	COAX_THET2, Q72K75_THET2, Q72G70_THET2, Q72JY5_THET2, Q72L08_THET2, Q72GN0_THET2, Q72JJ5_THET2, Q72GA0_THET2, Q72GW8_THET2, Q72IY4_THET2, Q72L24_THET2, NPD_THET2, Q72K09_THET2, Q72GJ8_THET2, Q72ID0_THET2, Q72GJ9_THET2, Q72H69_THET2, Q746J7_THET2, Q72JJ4_THET2, NUSB_THET2, SYN_THET2, Q72KG4_THET2, ARGR_THET2, Q72JH4_THET2, Q72KB4_THET2, Q72IY7_THET2, Q72H56_THET2, Q72JY9_THET2, Q72GP8_THET2, Q72IB…	582	144	1772	0.761168	1	1	100
GOTERM_BP_FAT	GO:0006355~regulation of transcription, DNA-dependent	34	3.13653	0.991901	Q72K75_THET2, Q72G70_THET2, Q72JY5_THET2, Q72L08_THET2, Q72GN0_THET2, Q72JJ5_THET2, Q72GA0_THET2, Q72GW8_THET2, Q72IY4_THET2, Q72L24_THET2, NPD_THET2, Q72K09_THET2, Q72GJ8_THET2, Q72ID0_THET2, Q72GJ9_THET2, Q72H69_THET2, Q746J7_THET2, Q72JJ4_THET2, NUSB_THET2, SYN_THET2, Q72KG4_THET2, ARGR_THET2, Q72JH4_THET2, Q72KB4_THET2, Q72IY7_THET2, Q72H56_THET2, Q72JY9_THET2, Q72GP8_THET2, Q72IB7_THET2, Q72…	582	137	1772	0.755612	1	1	100
GOTERM_BP_FAT	GO:0051252~regulation of RNA metabolic process	34	3.13653	0.9941	Q72K75_THET2, Q72G70_THET2, Q72JY5_THET2, Q72L08_THET2, Q72GN0_THET2, Q72JJ5_THET2, Q72GA0_THET2, Q72GW8_THET2, Q72IY4_THET2, Q72L24_THET2, NPD_THET2, Q72K09_THET2, Q72GJ8_THET2, Q72ID0_THET2, Q72GJ9_THET2, Q72H69_THET2, Q746J7_THET2, Q72JJ4_THET2, NUSB_THET2, SYN_THET2, Q72KG4_THET2, ARGR_THET2, Q72JH4_THET2, Q72KB4_THET2, Q72IY7_THET2, Q72H56_THET2, Q72JY9_THET2, Q72GP8_THET2, Q72IB7_THET2, Q72…	582	139	1772	0.74474	1	1	100
Annotation Cluster 113	Enrichment Score: 0.015538523039440654
Category	Term	Count	%	PValue	Genes	List Total	Pop Hits	Pop Total	Fold Enrichment	Bonferroni	Benjamini	FDR
GOTERM_MF_FAT	GO:0004536~deoxyribonuclease activity	3	0.276753	0.951658	Q72IQ7_THET2, RUVC_THET2, NFI_THET2	667	13	2095	0.72483	1	1	100
GOTERM_MF_FAT	GO:0004520~endodeoxyribonuclease activity	3	0.276753	0.951658	Q72IQ7_THET2, RUVC_THET2, NFI_THET2	667	13	2095	0.72483	1	1	100
GOTERM_MF_FAT	GO:0004519~endonuclease activity	6	0.553506	0.991798	Q72GP2_THET2, Q72HF2_THET2, Q72IQ7_THET2, Q72I36_THET2, RUVC_THET2, NFI_THET2	667	33	2095	0.571078	1	1	100

## Sheet: 5b-34_total
Annotation Cluster 1	Enrichment Score: 6.514590848325939
Category	Term	Count	%	PValue	Genes	List Total	Pop Hits	Pop Total	Fold Enrichment	Bonferroni	Benjamini	FDR
GOTERM_BP_FAT	GO:0006412~translation	65	7.91717	1.08062e-11	Q72GJ6_THET2, SYD_THET2, RL10_THET2, RS9_THET2, SYE_THET2, SYFB_THET2, RL18_THET2, SYP_THET2, SYS_THET2, DEF_THET2, RL23_THET2, SYA_THET2, RS11_THET2, GATB_THET2, RS18_THET2, RL33_THET2, SYG_THET2, Q72JB4_THET2, RL27_THET2, SYH_THET2, SYI_THET2, RL9_THET2, IF2_THET2, RS15_THET2, RL7_THET2, RL19_THET2, EFTS_THET2, RRF_THET2, SYT_THET2, RS8_THET2, EFTU_THET2, RL4_THET2, Q72J48_THET2, RS4_THET2, RL1…	447	121	1772	2.12953	6.33246e-09	6.33246e-09	1.59084e-08
SP_PIR_KEYWORDS	ribosomal protein	35	4.26309	2.01264e-10	RS8_THET2, RL4_THET2, RS4_THET2, RL13_THET2, RL10_THET2, RL24_THET2, RS9_THET2, RL18_THET2, RS13_THET2, RL6_THET2, RL23_THET2, RS5_THET2, RS11_THET2, RL25_THET2, RS20_THET2, RS18_THET2, RL35_THET2, RL33_THET2, RL1_THET2, RL21_THET2, RL27_THET2, RL32_THET2, RL9_THET2, Q72GM4_THET2, Q72HE6_THET2, RL17_THET2, RS15_THET2, RL20_THET2, RL7_THET2, RL19_THET2, RS7_THET2, RL30_THET2, Q72K74_THET2, RS2_THE…	821	61	4254	2.97298	3.50199e-08	3.50199e-08	2.46502e-07
SP_PIR_KEYWORDS	ribonucleoprotein	32	3.89769	5.15375e-09	RS8_THET2, RL4_THET2, RS4_THET2, RL13_THET2, RL10_THET2, RL24_THET2, RS9_THET2, RL18_THET2, RS13_THET2, RL6_THET2, RL23_THET2, RS5_THET2, RS11_THET2, RL25_THET2, RS18_THET2, RS20_THET2, RL33_THET2, RL35_THET2, RL1_THET2, RL21_THET2, RL27_THET2, RL32_THET2, RL9_THET2, RL17_THET2, RS15_THET2, RL20_THET2, RL7_THET2, RL19_THET2, RS7_THET2, RL30_THET2, RS2_THET2, RL3_THET2	821	58	4254	2.85875	8.96751e-07	2.98917e-07	6.31216e-06
GOTERM_CC_FAT	GO:0030529~ribonucleoprotein complex	37	4.5067	1.14164e-08	RS8_THET2, RL4_THET2, RS4_THET2, RL13_THET2, RL10_THET2, RL24_THET2, RS9_THET2, RL18_THET2, RS13_THET2, RL6_THET2, RL23_THET2, RS5_THET2, RS11_THET2, RL25_THET2, RS20_THET2, RS18_THET2, RL35_THET2, RL33_THET2, RL1_THET2, RL21_THET2, RL27_THET2, RL32_THET2, RL9_THET2, Q72GM4_THET2, RIMM_THET2, Q72HE6_THET2, RL17_THET2, RL20_THET2, RS15_THET2, RL7_THET2, RL19_THET2, RS7_THET2, RL30_THET2, Q72K74_TH…	127	64	499	2.27153	6.62151e-07	6.62151e-07	1.13586e-05
GOTERM_CC_FAT	GO:0005840~ribosome	36	4.3849	1.72661e-08	RS8_THET2, RL4_THET2, RS4_THET2, RL13_THET2, RL10_THET2, RL24_THET2, RS9_THET2, RL18_THET2, RS13_THET2, RL6_THET2, RL23_THET2, RS5_THET2, RS11_THET2, RL25_THET2, RS20_THET2, RS18_THET2, RL35_THET2, RL33_THET2, RL1_THET2, RL21_THET2, RL27_THET2, RL32_THET2, RL9_THET2, Q72GM4_THET2, RIMM_THET2, Q72HE6_THET2, RL17_THET2, RS15_THET2, RL20_THET2, RL7_THET2, RL19_THET2, RS7_THET2, RL30_THET2, Q72K74_TH…	127	62	499	2.28143	1.00144e-06	5.00718e-07	1.71787e-05
GOTERM_CC_FAT	GO:0043228~non-membrane-bounded organelle	41	4.99391	8.45531e-08	Q72J57_THET2, RS8_THET2, Q72IZ1_THET2, RL4_THET2, RS4_THET2, RL10_THET2, RL24_THET2, RL13_THET2, RS9_THET2, Q72J83_THET2, RL18_THET2, RS13_THET2, RL6_THET2, RL23_THET2, RS5_THET2, RS11_THET2, RL25_THET2, RS18_THET2, RS20_THET2, RL35_THET2, RL33_THET2, Q72GB7_THET2, RL1_THET2, RL21_THET2, RL27_THET2, RL32_THET2, RL9_THET2, Q72GM4_THET2, RIMM_THET2, Q72HE6_THET2, RL17_THET2, RL20_THET2, RS15_THET2,…	127	79	499	2.03917	4.90407e-06	1.63469e-06	8.41248e-05
GOTERM_CC_FAT	GO:0043232~intracellular non-membrane-bounded organelle	41	4.99391	8.45531e-08	Q72J57_THET2, RS8_THET2, Q72IZ1_THET2, RL4_THET2, RS4_THET2, RL10_THET2, RL24_THET2, RL13_THET2, RS9_THET2, Q72J83_THET2, RL18_THET2, RS13_THET2, RL6_THET2, RL23_THET2, RS5_THET2, RS11_THET2, RL25_THET2, RS18_THET2, RS20_THET2, RL35_THET2, RL33_THET2, Q72GB7_THET2, RL1_THET2, RL21_THET2, RL27_THET2, RL32_THET2, RL9_THET2, Q72GM4_THET2, RIMM_THET2, Q72HE6_THET2, RL17_THET2, RL20_THET2, RS15_THET2,…	127	79	499	2.03917	4.90407e-06	1.63469e-06	8.41248e-05
KEGG_PATHWAY	tth03010:Ribosome	33	4.01949	2.10665e-07	RS8_THET2, RL4_THET2, RS4_THET2, RL13_THET2, RL10_THET2, RL24_THET2, RS9_THET2, RL18_THET2, RS13_THET2, RL6_THET2, RL23_THET2, RS5_THET2, RS11_THET2, RL25_THET2, RS20_THET2, RS18_THET2, RL35_THET2, RL33_THET2, RL1_THET2, RL21_THET2, RL27_THET2, RL32_THET2, RL9_THET2, Q72GM4_THET2, RL17_THET2, RS15_THET2, RL20_THET2, RL7_THET2, RL19_THET2, RS7_THET2, RL30_THET2, RS2_THET2, RL3_THET2	347	52	1244	2.27511	2.52794e-05	1.26398e-05	0.000241828
GOTERM_MF_FAT	GO:0005198~structural molecule activity	33	4.01949	5.4003e-07	RS8_THET2, RL4_THET2, RS4_THET2, RL13_THET2, RL24_THET2, RS9_THET2, RL18_THET2, RS13_THET2, RL6_THET2, RL23_THET2, RS5_THET2, RS11_THET2, RL25_THET2, RS18_THET2, RS20_THET2, RL33_THET2, RL35_THET2, Q72I60_THET2, RL1_THET2, RL21_THET2, RL27_THET2, RL32_THET2, RL9_THET2, Q72GM4_THET2, RL17_THET2, RS15_THET2, RL20_THET2, RL7_THET2, RL19_THET2, RS7_THET2, RL30_THET2, RS2_THET2, RL3_THET2	522	58	2095	2.28349	0.000328824	0.000328824	0.000799205
GOTERM_MF_FAT	GO:0003735~structural constituent of ribosome	32	3.89769	7.42271e-07	RS8_THET2, RL4_THET2, RS4_THET2, RL13_THET2, RL24_THET2, RS9_THET2, RL18_THET2, RS13_THET2, RL6_THET2, RL23_THET2, RS5_THET2, RS11_THET2, RL25_THET2, RS18_THET2, RS20_THET2, RL33_THET2, RL35_THET2, RL1_THET2, RL21_THET2, RL27_THET2, RL32_THET2, RL9_THET2, Q72GM4_THET2, RL17_THET2, RS15_THET2, RL20_THET2, RL7_THET2, RL19_THET2, RS7_THET2, RL30_THET2, RS2_THET2, RL3_THET2	522	56	2095	2.29338	0.000451941	0.000225996	0.00109851
SP_PIR_KEYWORDS	rrna-binding	24	2.92326	1.45534e-06	RL33_THET2, RS8_THET2, RL4_THET2, RL1_THET2, RL21_THET2, RS4_THET2, RL24_THET2, RL9_THET2, RS9_THET2, RS15_THET2, RL20_THET2, RL18_THET2, RL19_THET2, RS13_THET2, RL6_THET2, RS7_THET2, RL23_THET2, RS5_THET2, RS11_THET2, RL25_THET2, RS2_THET2, RL3_THET2, RS20_THET2, RS18_THET2	821	45	4254	2.76346	0.000253198	3.61751e-05	0.00178245
SP_PIR_KEYWORDS	rna-binding	32	3.89769	2.62417e-05	RS8_THET2, RL4_THET2, Q72J48_THET2, RS4_THET2, RL24_THET2, RS9_THET2, SYFB_THET2, RL18_THET2, RS13_THET2, RL6_THET2, RL23_THET2, THII_THET2, SYA_THET2, RS5_THET2, RS11_THET2, RL25_THET2, PNP_THET2, RS18_THET2, RS20_THET2, RL33_THET2, Q72KG4_THET2, RL1_THET2, RL21_THET2, Q72K93_THET2, MNMA_THET2, RL9_THET2, RS15_THET2, RL20_THET2, RL19_THET2, RS7_THET2, RS2_THET2, RL3_THET2	821	79	4254	2.09883	0.00455571	0.000456508	0.0321354
GOTERM_MF_FAT	GO:0019843~rRNA binding	24	2.92326	0.000113953	RL33_THET2, RS8_THET2, RL4_THET2, RL1_THET2, RL21_THET2, RS4_THET2, RL24_THET2, RL9_THET2, RS9_THET2, RS15_THET2, RL20_THET2, RL18_THET2, RL19_THET2, RS13_THET2, RL6_THET2, RS7_THET2, RL23_THET2, RS5_THET2, RS11_THET2, RL25_THET2, RS2_THET2, RL3_THET2, RS20_THET2, RS18_THET2	522	45	2095	2.14049	0.067048	0.0228683	0.168511
KEGG_PATHWAY	ttj03010:Ribosome	30	3.65408	0.000293419	RS8_THET2, RL4_THET2, RS4_THET2, RL13_THET2, RL10_THET2, RL24_THET2, RS9_THET2, RL18_THET2, RS13_THET2, RL6_THET2, RL23_THET2, RS5_THET2, RS20_THET2, RS18_THET2, RL33_THET2, RL35_THET2, RL1_THET2, RL21_THET2, RL27_THET2, RL32_THET2, RL9_THET2, Q72GM4_THET2, RS15_THET2, RL20_THET2, RL17_THET2, RL7_THET2, RL19_THET2, RL30_THET2, RS2_THET2, RL3_THET2	347	59	1244	1.82289	0.0346026	0.00701835	0.336308
GOTERM_MF_FAT	GO:0003723~RNA binding	45	5.48112	0.0112162	RS8_THET2, RL4_THET2, Q72GY4_THET2, Q72J48_THET2, RS4_THET2, RL24_THET2, RS9_THET2, TRUA_THET2, SYFB_THET2, RL18_THET2, RS13_THET2, Q72HM4_THET2, RL6_THET2, RL23_THET2, THII_THET2, RS5_THET2, RS11_THET2, RL25_THET2, PROB_THET2, PNP_THET2, RS18_THET2, RS20_THET2, RL33_THET2, NUSB_THET2, TRMD_THET2, Q72KG4_THET2, RL1_THET2, RL21_THET2, Q72K93_THET2, MNMA_THET2, TRUD_THET2, Q72JU6_THET2, RL9_THET2, …	522	130	2095	1.38926	0.998961	0.681736	15.3741
Annotation Cluster 2	Enrichment Score: 4.099191348821276
Category	Term	Count	%	PValue	Genes	List Total	Pop Hits	Pop Total	Fold Enrichment	Bonferroni	Benjamini	FDR
SP_PIR_KEYWORDS	protein biosynthesis	33	4.01949	9.91016e-10	EFTU_THET2, RS8_THET2, Q72J48_THET2, SYD_THET2, SYE_THET2, SYFB_THET2, SYP_THET2, SYS_THET2, SYK_THET2, RL6_THET2, DEF_THET2, SYA_THET2, SYR_THET2, Q72GM3_THET2, GATB_THET2, SYN_THET2, SYG_THET2, Q72JB4_THET2, FMT_THET2, SYH_THET2, SYI_THET2, SYV_THET2, IF2_THET2, EFG_THET2, RS15_THET2, Q72L79_THET2, SYC_THET2, GATA_THET2, EFTS_THET2, RRF_THET2, RS2_THET2, SYT_THET2	821	58	4254	2.94809	1.72437e-07	8.62183e-08	1.21377e-06
KEGG_PATHWAY	tth00970:Aminoacyl-tRNA biosynthesis	22	2.67966	2.07417e-08	SYG_THET2, SYN_THET2, Q72JB4_THET2, Q72J48_THET2, SYD_THET2, FMT_THET2, SYH_THET2, SYI_THET2, SYV_THET2, SYE_THET2, SYFB_THET2, Q72L79_THET2, SYC_THET2, SYP_THET2, GATA_THET2, SYS_THET2, SYK_THET2, SYA_THET2, SYR_THET2, GATB_THET2, Q72GM3_THET2, SYT_THET2	347	26	1244	3.03347	2.489e-06	2.489e-06	2.381e-05
SP_PIR_KEYWORDS	ligase	44	5.35932	4.32643e-06	ACCD_THET2, Q72H76_THET2, PANC_THET2, PURL_THET2, Q72J48_THET2, SYD_THET2, Q72JI9_THET2, PURQ_THET2, SYE_THET2, Q72JQ4_THET2, SYFB_THET2, SYP_THET2, Q72GY5_THET2, SYK_THET2, SYS_THET2, CARA_THET2, SYA_THET2, SYR_THET2, Q72JP8_THET2, Q72GM3_THET2, GATB_THET2, SYN_THET2, SYG_THET2, Q72JB4_THET2, Q72L91_THET2, CARB_THET2, Q72GE4_THET2, FTHS_THET2, SYH_THET2, MURD_THET2, SYI_THET2, Q72JL4_THET2, Q72I…	821	116	4254	1.96539	0.000752516	9.40955e-05	0.00529876
SP_PIR_KEYWORDS	Aminoacyl-tRNA synthetase	19	2.31425	1.09407e-05	SYG_THET2, SYN_THET2, Q72JB4_THET2, Q72J48_THET2, SYD_THET2, SYH_THET2, SYI_THET2, SYV_THET2, SYE_THET2, SYFB_THET2, Q72L79_THET2, SYC_THET2, SYP_THET2, SYK_THET2, SYS_THET2, SYA_THET2, SYR_THET2, Q72GM3_THET2, SYT_THET2	821	34	4254	2.89554	0.00190188	0.000211499	0.013399
GOTERM_BP_FAT	GO:0043038~amino acid activation	20	2.43605	0.000111747	SYG_THET2, SYN_THET2, Q72JB4_THET2, Q72J48_THET2, SYD_THET2, SYH_THET2, SYI_THET2, SYV_THET2, SYE_THET2, HISZ_THET2, SYFB_THET2, Q72L79_THET2, SYC_THET2, SYP_THET2, SYK_THET2, SYS_THET2, SYA_THET2, SYR_THET2, Q72GM3_THET2, SYT_THET2	447	34	1772	2.33189	0.0633892	0.0322135	0.164383
GOTERM_BP_FAT	GO:0043039~tRNA aminoacylation	20	2.43605	0.000111747	SYG_THET2, SYN_THET2, Q72JB4_THET2, Q72J48_THET2, SYD_THET2, SYH_THET2, SYI_THET2, SYV_THET2, SYE_THET2, HISZ_THET2, SYFB_THET2, Q72L79_THET2, SYC_THET2, SYP_THET2, SYK_THET2, SYS_THET2, SYA_THET2, SYR_THET2, Q72GM3_THET2, SYT_THET2	447	34	1772	2.33189	0.0633892	0.0322135	0.164383
GOTERM_BP_FAT	GO:0006418~tRNA aminoacylation for protein translation	20	2.43605	0.000111747	SYG_THET2, SYN_THET2, Q72JB4_THET2, Q72J48_THET2, SYD_THET2, SYH_THET2, SYI_THET2, SYV_THET2, SYE_THET2, HISZ_THET2, SYFB_THET2, Q72L79_THET2, SYC_THET2, SYP_THET2, SYK_THET2, SYS_THET2, SYA_THET2, SYR_THET2, Q72GM3_THET2, SYT_THET2	447	34	1772	2.33189	0.0633892	0.0322135	0.164383
GOTERM_MF_FAT	GO:0016875~ligase activity, forming carbon-oxygen bonds	20	2.43605	0.000162143	SYG_THET2, SYN_THET2, Q72JB4_THET2, Q72J48_THET2, SYD_THET2, SYH_THET2, SYI_THET2, SYV_THET2, SYE_THET2, HISZ_THET2, SYFB_THET2, Q72L79_THET2, SYC_THET2, SYP_THET2, SYK_THET2, SYS_THET2, SYA_THET2, SYR_THET2, Q72GM3_THET2, SYT_THET2	522	35	2095	2.29338	0.0940336	0.024386	0.239693
GOTERM_MF_FAT	GO:0016876~ligase activity, forming aminoacyl-tRNA and related compounds	20	2.43605	0.000162143	SYG_THET2, SYN_THET2, Q72JB4_THET2, Q72J48_THET2, SYD_THET2, SYH_THET2, SYI_THET2, SYV_THET2, SYE_THET2, HISZ_THET2, SYFB_THET2, Q72L79_THET2, SYC_THET2, SYP_THET2, SYK_THET2, SYS_THET2, SYA_THET2, SYR_THET2, Q72GM3_THET2, SYT_THET2	522	35	2095	2.29338	0.0940336	0.024386	0.239693
GOTERM_MF_FAT	GO:0004812~aminoacyl-tRNA ligase activity	20	2.43605	0.000162143	SYG_THET2, SYN_THET2, Q72JB4_THET2, Q72J48_THET2, SYD_THET2, SYH_THET2, SYI_THET2, SYV_THET2, SYE_THET2, HISZ_THET2, SYFB_THET2, Q72L79_THET2, SYC_THET2, SYP_THET2, SYK_THET2, SYS_THET2, SYA_THET2, SYR_THET2, Q72GM3_THET2, SYT_THET2	522	35	2095	2.29338	0.0940336	0.024386	0.239693
GOTERM_BP_FAT	GO:0006399~tRNA metabolic process	30	3.65408	0.00098797	TRMFO_THET2, MIAA_THET2, Q72J48_THET2, SYD_THET2, HISZ_THET2, SYE_THET2, SYFB_THET2, TRUA_THET2, SYP_THET2, SYS_THET2, SYK_THET2, MNME_THET2, SYA_THET2, SYR_THET2, Q72GM3_THET2, TRMD_THET2, SYN_THET2, SYG_THET2, Q72JB4_THET2, TGT_THET2, TRUD_THET2, MNMA_THET2, SYH_THET2, SYI_THET2, SYV_THET2, TRMI_THET2, Q72L79_THET2, SYC_THET2, TRUB_THET2, SYT_THET2	447	68	1772	1.74891	0.439674	0.175583	1.44462
GOTERM_BP_FAT	GO:0034660~ncRNA metabolic process	34	4.14129	0.00244626	Q72L94_THET2, TRMFO_THET2, MIAA_THET2, Q72J48_THET2, SYD_THET2, RSMG_THET2, HISZ_THET2, SYE_THET2, SYFB_THET2, TRUA_THET2, SYP_THET2, SYS_THET2, SYK_THET2, MNME_THET2, SYA_THET2, SYR_THET2, Q72K73_THET2, Q72GM3_THET2, TRMD_THET2, SYN_THET2, SYG_THET2, Q72JB4_THET2, TGT_THET2, TRUD_THET2, MNMA_THET2, SYH_THET2, SYI_THET2, SYV_THET2, RIMM_THET2, TRMI_THET2, Q72L79_THET2, SYC_THET2, TRUB_THET2, SYT_…	447	84	1772	1.60456	0.761948	0.301497	3.54145
INTERPRO	IPR006195:Aminoacyl-tRNA synthetase, class II, conserved region	9	1.09622	0.00563516	HISZ_THET2, SYG_THET2, SYN_THET2, SYP_THET2, SYK_THET2, SYS_THET2, SYD_THET2, SYH_THET2, SYT_THET2	733	15	3493	2.85921	0.999517	0.999517	8.85391
INTERPRO	IPR001412:Aminoacyl-tRNA synthetase, class I, conserved site	8	0.974421	0.00902465	SYE_THET2, Q72JB4_THET2, Q72L79_THET2, SYC_THET2, SYI_THET2, SYR_THET2, Q72GM3_THET2, SYV_THET2	733	13	3493	2.93252	0.999995	0.99781	13.8191
KEGG_PATHWAY	ttj00970:Aminoacyl-tRNA biosynthesis	13	1.58343	0.0457135	SYE_THET2, SYN_THET2, SYC_THET2, GATA_THET2, SYK_THET2, SYD_THET2, SYH_THET2, SYA_THET2, SYI_THET2, SYR_THET2, GATB_THET2, SYV_THET2, Q72GM3_THET2	347	27	1244	1.72612	0.996357	0.267976	41.5578
Annotation Cluster 3	Enrichment Score: 2.5407193605162917
Category	Term	Count	%	PValue	Genes	List Total	Pop Hits	Pop Total	Fold Enrichment	Bonferroni	Benjamini	FDR
SP_PIR_KEYWORDS	atp-binding	102	12.4239	3.8209e-08	Q72H76_THET2, MIAA_THET2, RECA_THET2, Q72IA2_THET2, Q72IA4_THET2, PURQ_THET2, Q72J51_THET2, Q72IY3_THET2, NDK_THET2, Q72J05_THET2, Q72HK4_THET2, KGUA_THET2, SYP_THET2, Q72HJ8_THET2, SYS_THET2, Q72GJ8_THET2, SYA_THET2, Q72KF9_THET2, Q72H73_THET2, Q72G97_THET2, Q72GB7_THET2, SYG_THET2, CH60_THET2, PGK_THET2, Q72GB4_THET2, DDL_THET2, Q72LF8_THET2, ISPE_THET2, GUAA_THET2, SYT_THET2, Q72IK4_THET2, PAN…	821	321	4254	1.64645	6.64835e-06	1.32967e-06	4.67974e-05
SP_PIR_KEYWORDS	nucleotide-binding	107	13.0329	9.63073e-08	Q72H76_THET2, MIAA_THET2, RECA_THET2, Q72IA2_THET2, Q72IA4_THET2, PURQ_THET2, Q72J51_THET2, Q72IY3_THET2, NDK_THET2, Q72J05_THET2, Q72HK4_THET2, KGUA_THET2, SYP_THET2, SYS_THET2, Q72GJ8_THET2, SYA_THET2, Q72KF9_THET2, Q72G97_THET2, Q72GB7_THET2, SYG_THET2, CH60_THET2, PGK_THET2, Q72GB4_THET2, DDL_THET2, Q72JP4_THET2, Q72LF8_THET2, ISPE_THET2, GUAA_THET2, SYT_THET2, EFTU_THET2, Q72IK4_THET2, PANC_…	821	347	4254	1.59775	1.67573e-05	2.79291e-06	0.000117954
GOTERM_MF_FAT	GO:0032555~purine ribonucleotide binding	127	15.4689	0.0109539	Q72H76_THET2, MIAA_THET2, MUTL_THET2, RECA_THET2, Q72IA2_THET2, Q72IA4_THET2, PURQ_THET2, Q72J51_THET2, Q72IY3_THET2, NDK_THET2, Q72J05_THET2, Q72HK4_THET2, KGUA_THET2, SYP_THET2, Q72HJ8_THET2, SYS_THET2, Q72IH4_THET2, Q72GJ8_THET2, Q72H73_THET2, Q72KF9_THET2, SYA_THET2, Q72G97_THET2, VATB_THET2, Q72GB7_THET2, SYG_THET2, CH60_THET2, PGK_THET2, Q72GB4_THET2, DDL_THET2, VATD_THET2, Q72JP4_THET2, Q7…	522	430	2095	1.18536	0.998779	0.73856	15.0413
GOTERM_MF_FAT	GO:0032553~ribonucleotide binding	127	15.4689	0.0109539	Q72H76_THET2, MIAA_THET2, MUTL_THET2, RECA_THET2, Q72IA2_THET2, Q72IA4_THET2, PURQ_THET2, Q72J51_THET2, Q72IY3_THET2, NDK_THET2, Q72J05_THET2, Q72HK4_THET2, KGUA_THET2, SYP_THET2, Q72HJ8_THET2, SYS_THET2, Q72IH4_THET2, Q72GJ8_THET2, Q72H73_THET2, Q72KF9_THET2, SYA_THET2, Q72G97_THET2, VATB_THET2, Q72GB7_THET2, SYG_THET2, CH60_THET2, PGK_THET2, Q72GB4_THET2, DDL_THET2, VATD_THET2, Q72JP4_THET2, Q7…	522	430	2095	1.18536	0.998779	0.73856	15.0413
GOTERM_MF_FAT	GO:0005524~ATP binding	115	14.0073	0.023379	Q72H76_THET2, MIAA_THET2, MUTL_THET2, RECA_THET2, Q72IA2_THET2, Q72IA4_THET2, PURQ_THET2, Q72J51_THET2, Q72IY3_THET2, NDK_THET2, Q72J05_THET2, Q72HK4_THET2, KGUA_THET2, SYP_THET2, Q72HJ8_THET2, SYS_THET2, Q72GJ8_THET2, Q72H73_THET2, Q72KF9_THET2, SYA_THET2, Q72G97_THET2, Q72GB7_THET2, VATB_THET2, SYG_THET2, CH60_THET2, PGK_THET2, Q72GB4_THET2, DDL_THET2, VATD_THET2, Q72LF8_THET2, ISPE_THET2, GUAA…	522	394	2095	1.17143	0.999999	0.834843	29.5384
GOTERM_MF_FAT	GO:0032559~adenyl ribonucleotide binding	115	14.0073	0.023379	Q72H76_THET2, MIAA_THET2, MUTL_THET2, RECA_THET2, Q72IA2_THET2, Q72IA4_THET2, PURQ_THET2, Q72J51_THET2, Q72IY3_THET2, NDK_THET2, Q72J05_THET2, Q72HK4_THET2, KGUA_THET2, SYP_THET2, Q72HJ8_THET2, SYS_THET2, Q72GJ8_THET2, Q72H73_THET2, Q72KF9_THET2, SYA_THET2, Q72G97_THET2, Q72GB7_THET2, VATB_THET2, SYG_THET2, CH60_THET2, PGK_THET2, Q72GB4_THET2, DDL_THET2, VATD_THET2, Q72LF8_THET2, ISPE_THET2, GUAA…	522	394	2095	1.17143	0.999999	0.834843	29.5384
GOTERM_MF_FAT	GO:0000166~nucleotide binding	160	19.4884	0.025664	Q72H76_THET2, MIAA_THET2, MUTL_THET2, RECA_THET2, Q72IA2_THET2, Q72IA4_THET2, PURQ_THET2, Q72J51_THET2, Q72IY3_THET2, LEU3_THET2, Q72J05_THET2, NDK_THET2, Q72HK4_THET2, KGUA_THET2, SYP_THET2, Q72HJ8_THET2, Q72IH4_THET2, SYS_THET2, NPD_THET2, Q72GJ8_THET2, Q72H73_THET2, Q72KF9_THET2, SYA_THET2, Q72G97_THET2, VATB_THET2, Q72JI3_THET2, Q72GB7_THET2, SYG_THET2, Q72K32_THET2, CH60_THET2, Q72JH4_THET2,…	522	568	2095	1.13054	1	0.82783	31.9392
GOTERM_MF_FAT	GO:0017076~purine nucleotide binding	138	16.8088	0.040346	Q72H76_THET2, MIAA_THET2, MUTL_THET2, RECA_THET2, Q72IA2_THET2, Q72IA4_THET2, PURQ_THET2, Q72J51_THET2, Q72IY3_THET2, NDK_THET2, Q72J05_THET2, Q72HK4_THET2, KGUA_THET2, SYP_THET2, Q72HJ8_THET2, Q72IH4_THET2, SYS_THET2, Q72GJ8_THET2, Q72H73_THET2, Q72KF9_THET2, SYA_THET2, Q72G97_THET2, VATB_THET2, Q72JI3_THET2, Q72GB7_THET2, SYG_THET2, CH60_THET2, PGK_THET2, Q72GB4_THET2, DDL_THET2, Q72KT2_THET2, …	522	490	2095	1.13031	1	0.91857	45.6363
GOTERM_MF_FAT	GO:0001882~nucleoside binding	127	15.4689	0.0739922	Q72H76_THET2, MIAA_THET2, MUTL_THET2, RECA_THET2, Q72IA2_THET2, Q72IA4_THET2, PURQ_THET2, Q72J51_THET2, Q72IY3_THET2, NDK_THET2, Q72J05_THET2, Q72HK4_THET2, KGUA_THET2, SYP_THET2, Q72HJ8_THET2, SYS_THET2, Q72GJ8_THET2, Q72H73_THET2, Q72KF9_THET2, SYA_THET2, Q72G97_THET2, VATB_THET2, Q72JI3_THET2, Q72GB7_THET2, SYG_THET2, CH60_THET2, PGK_THET2, Q72GB4_THET2, DDL_THET2, Q72KT2_THET2, VATD_THET2, Q7…	522	457	2095	1.11532	1	0.979784	67.9433
GOTERM_MF_FAT	GO:0001883~purine nucleoside binding	126	15.3471	0.0780873	Q72H76_THET2, MIAA_THET2, MUTL_THET2, RECA_THET2, Q72IA2_THET2, Q72IA4_THET2, PURQ_THET2, Q72J51_THET2, Q72IY3_THET2, NDK_THET2, Q72J05_THET2, Q72HK4_THET2, KGUA_THET2, SYP_THET2, Q72HJ8_THET2, SYS_THET2, Q72GJ8_THET2, Q72H73_THET2, Q72KF9_THET2, SYA_THET2, Q72G97_THET2, VATB_THET2, Q72JI3_THET2, Q72GB7_THET2, SYG_THET2, CH60_THET2, PGK_THET2, Q72GB4_THET2, DDL_THET2, Q72KT2_THET2, VATD_THET2, Q7…	522	454	2095	1.11385	1	0.963153	69.9785
GOTERM_MF_FAT	GO:0030554~adenyl nucleotide binding	126	15.3471	0.0780873	Q72H76_THET2, MIAA_THET2, MUTL_THET2, RECA_THET2, Q72IA2_THET2, Q72IA4_THET2, PURQ_THET2, Q72J51_THET2, Q72IY3_THET2, NDK_THET2, Q72J05_THET2, Q72HK4_THET2, KGUA_THET2, SYP_THET2, Q72HJ8_THET2, SYS_THET2, Q72GJ8_THET2, Q72H73_THET2, Q72KF9_THET2, SYA_THET2, Q72G97_THET2, VATB_THET2, Q72JI3_THET2, Q72GB7_THET2, SYG_THET2, CH60_THET2, PGK_THET2, Q72GB4_THET2, DDL_THET2, Q72KT2_THET2, VATD_THET2, Q7…	522	454	2095	1.11385	1	0.963153	69.9785
Annotation Cluster 4	Enrichment Score: 1.9459936897010661
Category	Term	Count	%	PValue	Genes	List Total	Pop Hits	Pop Total	Fold Enrichment	Bonferroni	Benjamini	FDR
KEGG_PATHWAY	tth00190:Oxidative phosphorylation	24	2.92326	4.94028e-06	Q72H24_THET2, VATB_THET2, VATA_THET2, Q72GC8_THET2, Q72H95_THET2, Q72GE1_THET2, NUOC_THET2, NUOK_THET2, Q72J68_THET2, VATE_THET2, Q72GD3_THET2, VATC_THET2, COXX_THET2, Q746J9_THET2, Q72GE0_THET2, Q72GD7_THET2, VATD_THET2, Q72GD4_THET2, Q72GD9_THET2, Q72HC8_THET2, NUOD_THET2, Q72J67_THET2, Q72LK2_THET2, Q72GD2_THET2	347	36	1244	2.39001	0.000592659	0.000148198	0.00567096
GOTERM_BP_FAT	GO:0006119~oxidative phosphorylation	13	1.58343	0.0396645	Q72H24_THET2, VATB_THET2, VATA_THET2, Q72GE1_THET2, NUOK_THET2, VATE_THET2, Q72J68_THET2, VATC_THET2, Q72GE0_THET2, VATD_THET2, Q72GD4_THET2, Q72GD9_THET2, Q72J67_THET2	447	29	1772	1.77706	1	0.991291	44.8888
GOTERM_BP_FAT	GO:0006793~phosphorus metabolic process	28	3.41048	0.097399	UPPP_THET2, KHSE_THET2, Q72H95_THET2, Q72J68_THET2, Q72IA2_THET2, Q72IA4_THET2, Q72JF5_THET2, Q72IY3_THET2, Q72GE0_THET2, Q72GJ2_THET2, Q72GJ8_THET2, Q72IJ3_THET2, Q72GJ9_THET2, Q72JJ4_THET2, Q72H24_THET2, VATB_THET2, VATA_THET2, Q72GE1_THET2, NUOK_THET2, VATE_THET2, VATC_THET2, VATD_THET2, GPDA_THET2, Q72GD4_THET2, Q72GD9_THET2, ISPE_THET2, Q72JF6_THET2, Q72J67_THET2, Q72L37_THET2	447	85	1772	1.30586	1	0.999812	77.8777
GOTERM_BP_FAT	GO:0006796~phosphate metabolic process	28	3.41048	0.097399	UPPP_THET2, KHSE_THET2, Q72H95_THET2, Q72J68_THET2, Q72IA2_THET2, Q72IA4_THET2, Q72JF5_THET2, Q72IY3_THET2, Q72GE0_THET2, Q72GJ2_THET2, Q72GJ8_THET2, Q72IJ3_THET2, Q72GJ9_THET2, Q72JJ4_THET2, Q72H24_THET2, VATB_THET2, VATA_THET2, Q72GE1_THET2, NUOK_THET2, VATE_THET2, VATC_THET2, VATD_THET2, GPDA_THET2, Q72GD4_THET2, Q72GD9_THET2, ISPE_THET2, Q72JF6_THET2, Q72J67_THET2, Q72L37_THET2	447	85	1772	1.30586	1	0.999812	77.8777
GOTERM_BP_FAT	GO:0016310~phosphorylation	24	2.92326	0.100177	Q72H24_THET2, VATB_THET2, KHSE_THET2, VATA_THET2, Q72GE1_THET2, NUOK_THET2, Q72J68_THET2, VATE_THET2, Q72IA2_THET2, Q72IA4_THET2, Q72JF5_THET2, Q72IY3_THET2, VATC_THET2, Q72GE0_THET2, VATD_THET2, Q72GD4_THET2, Q72GD9_THET2, Q72GJ2_THET2, ISPE_THET2, Q72GJ8_THET2, Q72J67_THET2, Q72IJ3_THET2, Q72GJ9_THET2, Q72L37_THET2, Q72JJ4_THET2	447	71	1772	1.34001	1	0.999561	78.8593
Annotation Cluster 5	Enrichment Score: 1.7165347969443354
Category	Term	Count	%	PValue	Genes	List Total	Pop Hits	Pop Total	Fold Enrichment	Bonferroni	Benjamini	FDR
KEGG_PATHWAY	tth00190:Oxidative phosphorylation	24	2.92326	4.94028e-06	Q72H24_THET2, VATB_THET2, VATA_THET2, Q72GC8_THET2, Q72H95_THET2, Q72GE1_THET2, NUOC_THET2, NUOK_THET2, Q72J68_THET2, VATE_THET2, Q72GD3_THET2, VATC_THET2, COXX_THET2, Q746J9_THET2, Q72GE0_THET2, Q72GD7_THET2, VATD_THET2, Q72GD4_THET2, Q72GD9_THET2, Q72HC8_THET2, NUOD_THET2, Q72J67_THET2, Q72LK2_THET2, Q72GD2_THET2	347	36	1244	2.39001	0.000592659	0.000148198	0.00567096
GOTERM_MF_FAT	GO:0008137~NADH dehydrogenase (ubiquinone) activity	11	1.33983	0.0193643	Q746J9_THET2, Q72GE0_THET2, Q72GD7_THET2, Q72GC8_THET2, Q72GD4_THET2, Q72GE1_THET2, Q72GD9_THET2, NUOK_THET2, NUOC_THET2, Q72GD3_THET2, Q72GD2_THET2	522	21	2095	2.10226	0.999993	0.81754	25.128
GOTERM_MF_FAT	GO:0016655~oxidoreductase activity, acting on NADH or NADPH, quinone or similar compound as acceptor	13	1.58343	0.0761911	Q72GE0_THET2, Q746J9_THET2, Q72GD7_THET2, Q72GD4_THET2, Q72GC8_THET2, Q72GE1_THET2, Q72GD9_THET2, NUOC_THET2, NUOK_THET2, Q72GL5_THET2, NUOD_THET2, Q72GD3_THET2, Q72GD2_THET2	522	32	2095	1.63045	1	0.968171	69.0516
GOTERM_MF_FAT	GO:0003954~NADH dehydrogenase activity	13	1.58343	0.0761911	Q72GE0_THET2, Q746J9_THET2, Q72GD7_THET2, Q72GD4_THET2, Q72GC8_THET2, Q72GE1_THET2, Q72GD9_THET2, NUOC_THET2, NUOK_THET2, NUOD_THET2, Q72GD3_THET2, Q72LK2_THET2, Q72GD2_THET2	522	32	2095	1.63045	1	0.968171	69.0516
GOTERM_MF_FAT	GO:0050136~NADH dehydrogenase (quinone) activity	12	1.46163	0.100986	Q746J9_THET2, Q72GE0_THET2, Q72GD7_THET2, Q72GC8_THET2, Q72GD4_THET2, Q72GE1_THET2, Q72GD9_THET2, NUOK_THET2, NUOC_THET2, NUOD_THET2, Q72GD3_THET2, Q72GD2_THET2	522	30	2095	1.60536	1	0.982613	79.3095
GOTERM_MF_FAT	GO:0016651~oxidoreductase activity, acting on NADH or NADPH	16	1.94884	0.107187	Q72HD8_THET2, Q72GC8_THET2, Q72GE1_THET2, Q72GS0_THET2, NUOK_THET2, NUOC_THET2, Q72GD3_THET2, Q746J9_THET2, Q72GE0_THET2, Q72GD7_THET2, Q72GD4_THET2, Q72GD9_THET2, Q72GL5_THET2, NUOD_THET2, Q72LK2_THET2, Q72GD2_THET2	522	44	2095	1.45942	1	0.982779	81.3239
GOTERM_BP_FAT	GO:0042773~ATP synthesis coupled electron transport	6	0.730816	0.16043	Q72H24_THET2, Q72GE0_THET2, Q72GD4_THET2, Q72GE1_THET2, Q72GD9_THET2, NUOK_THET2	447	12	1772	1.9821	1	0.997589	92.3792
Annotation Cluster 6	Enrichment Score: 1.4793354090289452
Category	Term	Count	%	PValue	Genes	List Total	Pop Hits	Pop Total	Fold Enrichment	Bonferroni	Benjamini	FDR
INTERPRO	IPR006195:Aminoacyl-tRNA synthetase, class II, conserved region	9	1.09622	0.00563516	HISZ_THET2, SYG_THET2, SYN_THET2, SYP_THET2, SYK_THET2, SYS_THET2, SYD_THET2, SYH_THET2, SYT_THET2	733	15	3493	2.85921	0.999517	0.999517	8.85391
INTERPRO	IPR002314:Aminoacyl-tRNA synthetase, class II (G, H, P and S), conserved region	6	0.730816	0.039306	HISZ_THET2, SYG_THET2, SYP_THET2, SYS_THET2, SYH_THET2, SYT_THET2	733	10	3493	2.85921	1	0.99998	48.2027
INTERPRO	IPR004154:Anticodon-binding	4	0.487211	0.164675	SYG_THET2, SYP_THET2, SYH_THET2, SYT_THET2	733	7	3493	2.72306	1	1	94.7756
Annotation Cluster 7	Enrichment Score: 1.1664644124069627
Category	Term	Count	%	PValue	Genes	List Total	Pop Hits	Pop Total	Fold Enrichment	Bonferroni	Benjamini	FDR
SP_PIR_KEYWORDS	Chaperone	11	1.33983	0.00455757	HSLO_THET2, RIMM_THET2, DNAJ_THET2, CH60_THET2, Q72L01_THET2, GRPE_THET2, Q72LJ2_THET2, CLPX_THET2, Q72IK7_THET2, CLPB_THET2, Q72L86_THET2, TIG_THET2	821	22	4254	2.59074	0.548342	0.0593091	5.44111
GOTERM_BP_FAT	GO:0006457~protein folding	8	0.974421	0.218474	HSLO_THET2, Q72H58_THET2, DNAJ_THET2, CH60_THET2, GRPE_THET2, CLPX_THET2, Q72IK7_THET2, Q72H64_THET2, TIG_THET2	447	20	1772	1.58568	1	0.998971	97.3456
GOTERM_MF_FAT	GO:0051082~unfolded protein binding	4	0.487211	0.318035	HSLO_THET2, DNAJ_THET2, CH60_THET2, CLPX_THET2, Q72IK7_THET2	522	8	2095	2.0067	1	0.999145	99.6534
Annotation Cluster 8	Enrichment Score: 1.0991214813113024
Category	Term	Count	%	PValue	Genes	List Total	Pop Hits	Pop Total	Fold Enrichment	Bonferroni	Benjamini	FDR
SP_PIR_KEYWORDS	cell division	15	1.82704	0.0138294	Q72IK4_THET2, Q72JQ5_THET2, Q72GE4_THET2, MURD_THET2, Q72JB5_THET2, Q72J51_THET2, Q72JP6_THET2, Q72JP4_THET2, Q72JQ4_THET2, Q72JA0_THET2, Q72JP5_THET2, Q72JA1_THET2, Q72JR4_THET2, MURG_THET2, Q72LM3_THET2, TIG_THET2	821	40	4254	1.94306	0.911355	0.12595	15.6808
GOTERM_BP_FAT	GO:0051301~cell division	16	1.94884	0.115937	Q72IK4_THET2, Q72JQ5_THET2, Q72GE4_THET2, MURD_THET2, Q72JB5_THET2, Q72J51_THET2, Q72JP6_THET2, Q72JP4_THET2, Q72JQ4_THET2, Q72JA0_THET2, Q72JP5_THET2, Q72JA1_THET2, Q72JR4_THET2, MURG_THET2, Q72JP8_THET2, Q72LM3_THET2, TIG_THET2	447	44	1772	1.44153	1	0.999269	83.7013
GOTERM_BP_FAT	GO:0007049~cell cycle	13	1.58343	0.145305	Q72GW7_THET2, Q72JQ4_THET2, Q72JP4_THET2, Q72JP5_THET2, Q72JA1_THET2, RSMG_THET2, Q72GE4_THET2, Q72JA2_THET2, Q72IW8_THET2, MURD_THET2, MURG_THET2, Q72JB5_THET2, TIG_THET2	447	35	1772	1.47242	1	0.998601	90.0881
SP_PIR_KEYWORDS	cell cycle	7	0.852619	0.172269	Q72JQ4_THET2, Q72JP4_THET2, Q72GE4_THET2, MURD_THET2, MURG_THET2, Q72JB5_THET2, TIG_THET2	821	20	4254	1.81352	1	0.619999	90.1298
Annotation Cluster 9	Enrichment Score: 1.0348154832351761
Category	Term	Count	%	PValue	Genes	List Total	Pop Hits	Pop Total	Fold Enrichment	Bonferroni	Benjamini	FDR
SP_PIR_KEYWORDS	dna-directed rna polymerase	5	0.609013	0.0497126	RPOC_THET2, RPOZ_THET2, RPOA_THET2, Q72J83_THET2, RPOB_THET2	821	8	4254	3.23843	0.99986	0.344591	46.4483
KEGG_PATHWAY	tth03020:RNA polymerase	4	0.487211	0.0677975	RPOC_THET2, RPOZ_THET2, RPOA_THET2, RPOB_THET2	347	4	1244	3.58501	0.999781	0.306697	55.3318
GOTERM_BP_FAT	GO:0032774~RNA biosynthetic process	9	1.09622	0.103893	RPOC_THET2, NUSB_THET2, Q72KG4_THET2, RPOZ_THET2, RPOA_THET2, Q72J83_THET2, RPOB_THET2, Q745Z1_THET2, Q72GW1_THET2	447	20	1772	1.78389	1	0.999209	80.1087
GOTERM_MF_FAT	GO:0003899~DNA-directed RNA polymerase activity	5	0.609013	0.111593	RPOC_THET2, RPOZ_THET2, RPOA_THET2, Q72J83_THET2, RPOB_THET2	522	8	2095	2.50838	1	0.977464	82.6423
GOTERM_MF_FAT	GO:0034062~RNA polymerase activity	5	0.609013	0.111593	RPOC_THET2, RPOZ_THET2, RPOA_THET2, Q72J83_THET2, RPOB_THET2	522	8	2095	2.50838	1	0.977464	82.6423
GOTERM_BP_FAT	GO:0006351~transcription, DNA-dependent	8	0.974421	0.141764	RPOC_THET2, NUSB_THET2, Q72KG4_THET2, RPOZ_THET2, RPOA_THET2, RPOB_THET2, Q745Z1_THET2, Q72GW1_THET2	447	18	1772	1.76187	1	0.998983	89.4661
Annotation Cluster 10	Enrichment Score: 1.0308734666740613
Category	Term	Count	%	PValue	Genes	List Total	Pop Hits	Pop Total	Fold Enrichment	Bonferroni	Benjamini	FDR
INTERPRO	IPR006195:Aminoacyl-tRNA synthetase, class II, conserved region	9	1.09622	0.00563516	HISZ_THET2, SYG_THET2, SYN_THET2, SYP_THET2, SYK_THET2, SYS_THET2, SYD_THET2, SYH_THET2, SYT_THET2	733	15	3493	2.85921	0.999517	0.999517	8.85391
INTERPRO	IPR004365:Nucleic acid binding, OB-fold, tRNA/helicase-type	5	0.609013	0.138013	Q72G97_THET2, Q72GP2_THET2, SYN_THET2, SYK_THET2, SYD_THET2	733	10	3493	2.38267	1	1	91.2525
INTERPRO	IPR004364:Aminoacyl-tRNA synthetase, class II (D, K and N)	3	0.365408	0.195574	SYN_THET2, SYK_THET2, SYD_THET2	733	4	3493	3.57401	1	1	97.1849
INTERPRO	IPR018150:Aminoacyl-tRNA synthetase, class II (D, K and N)-like	3	0.365408	0.195574	SYN_THET2, SYK_THET2, SYD_THET2	733	4	3493	3.57401	1	1	97.1849
PIR_SUPERFAMILY	PIRSF001525:lysine-tRNA ligase	3	0.365408	0.235603	SYN_THET2, SYK_THET2, SYD_THET2	505	4	2150	3.19307	1	1	98.0174
Annotation Cluster 11	Enrichment Score: 0.9859021034451315
Category	Term	Count	%	PValue	Genes	List Total	Pop Hits	Pop Total	Fold Enrichment	Bonferroni	Benjamini	FDR
INTERPRO	IPR001412:Aminoacyl-tRNA synthetase, class I, conserved site	8	0.974421	0.00902465	SYE_THET2, Q72JB4_THET2, Q72L79_THET2, SYC_THET2, SYI_THET2, SYR_THET2, Q72GM3_THET2, SYV_THET2	733	13	3493	2.93252	0.999995	0.99781	13.8191
INTERPRO	IPR002300:Aminoacyl-tRNA synthetase, class Ia	3	0.365408	0.11326	SYI_THET2, Q72GM3_THET2, SYV_THET2	733	3	3493	4.76535	1	1	86.0813
INTERPRO	IPR013155:Valyl/Leucyl/Isoleucyl-tRNA synthetase, class I, anticodon-binding	3	0.365408	0.11326	SYI_THET2, Q72GM3_THET2, SYV_THET2	733	3	3493	4.76535	1	1	86.0813
KEGG_PATHWAY	ttj00290:Valine, leucine and isoleucine biosynthesis	3	0.365408	0.983583	SYI_THET2, Q72GM3_THET2, SYV_THET2	347	19	1244	0.566055	1	0.999797	100
Annotation Cluster 12	Enrichment Score: 0.9834260527737717
Category	Term	Count	%	PValue	Genes	List Total	Pop Hits	Pop Total	Fold Enrichment	Bonferroni	Benjamini	FDR
SP_PIR_KEYWORDS	potassium	4	0.487211	0.0900427	Q72JG2_THET2, Q72G87_THET2, Q72G86_THET2, Q72LJ5_THET2, MNME_THET2, METK_THET2	821	6	4254	3.45432	1	0.455606	68.5152
GOTERM_MF_FAT	GO:0031420~alkali metal ion binding	5	0.609013	0.111593	Q72JG2_THET2, Q72H84_THET2, Q72G87_THET2, Q72G86_THET2, Q72LJ5_THET2, MNME_THET2, METK_THET2	522	8	2095	2.50838	1	0.977464	82.6423
GOTERM_MF_FAT	GO:0030955~potassium ion binding	5	0.609013	0.111593	Q72JG2_THET2, Q72H84_THET2, Q72G87_THET2, Q72G86_THET2, Q72LJ5_THET2, MNME_THET2, METK_THET2	522	8	2095	2.50838	1	0.977464	82.6423
Annotation Cluster 13	Enrichment Score: 0.8238490369788659
Category	Term	Count	%	PValue	Genes	List Total	Pop Hits	Pop Total	Fold Enrichment	Bonferroni	Benjamini	FDR
INTERPRO	IPR001412:Aminoacyl-tRNA synthetase, class I, conserved site	8	0.974421	0.00902465	SYE_THET2, Q72JB4_THET2, Q72L79_THET2, SYC_THET2, SYI_THET2, SYR_THET2, Q72GM3_THET2, SYV_THET2	733	13	3493	2.93252	0.999995	0.99781	13.8191
UP_SEQ_FEATURE	short sequence motif:"HIGH" region	5	0.609013	0.211846	SYE_THET2, SYC_THET2, SYI_THET2, SYR_THET2, SYV_THET2	185	8	593	2.00338	1	1	96.0742
UP_SEQ_FEATURE	short sequence motif:"KMSKS" region	4	0.487211	0.376102	SYE_THET2, SYC_THET2, SYI_THET2, SYV_THET2	185	7	593	1.83166	1	1	99.8365
UP_SEQ_FEATURE	binding site:ATP	6	0.730816	0.704446	SYE_THET2, NDK_THET2, SYC_THET2, PGK_THET2, SYI_THET2, SYV_THET2	185	18	593	1.06847	1	1	100
Annotation Cluster 14	Enrichment Score: 0.7579771862242528
Category	Term	Count	%	PValue	Genes	List Total	Pop Hits	Pop Total	Fold Enrichment	Bonferroni	Benjamini	FDR
GOTERM_MF_FAT	GO:0008137~NADH dehydrogenase (ubiquinone) activity	11	1.33983	0.0193643	Q746J9_THET2, Q72GE0_THET2, Q72GD7_THET2, Q72GC8_THET2, Q72GD4_THET2, Q72GE1_THET2, Q72GD9_THET2, NUOK_THET2, NUOC_THET2, Q72GD3_THET2, Q72GD2_THET2	522	21	2095	2.10226	0.999993	0.81754	25.128
GOTERM_BP_FAT	GO:0042773~ATP synthesis coupled electron transport	6	0.730816	0.16043	Q72H24_THET2, Q72GE0_THET2, Q72GD4_THET2, Q72GE1_THET2, Q72GD9_THET2, NUOK_THET2	447	12	1772	1.9821	1	0.997589	92.3792
GOTERM_BP_FAT	GO:0022904~respiratory electron transport chain	7	0.852619	0.28769	Q72H24_THET2, Q72GE0_THET2, Q72GD4_THET2, Q72GE1_THET2, Q72GD9_THET2, NUOK_THET2, Q72HC8_THET2	447	18	1772	1.54164	1	0.999366	99.3223
INTERPRO	IPR001750:NADH:ubiquinone/plastoquinone oxidoreductase	3	0.365408	0.368145	Q72GE0_THET2, Q72GE1_THET2, Q72GD9_THET2	733	6	3493	2.38267	1	1	99.9464
GOTERM_BP_FAT	GO:0022900~electron transport chain	8	0.974421	0.493038	Q72H24_THET2, Q72GE0_THET2, Q72GD4_THET2, Q72GE1_THET2, Q72GD9_THET2, NUOK_THET2, Q72HC8_THET2, Q72LJ2_THET2	447	26	1772	1.21976	1	0.998955	99.9955
Annotation Cluster 15	Enrichment Score: 0.7577233688739113
Category	Term	Count	%	PValue	Genes	List Total	Pop Hits	Pop Total	Fold Enrichment	Bonferroni	Benjamini	FDR
GOTERM_BP_FAT	GO:0006544~glycine metabolic process	6	0.730816	0.0795378	Q72HL8_THET2, GCSH_THET2, GCST_THET2, GCSPB_THET2, Q72LA9_THET2, GLYA_THET2	447	10	1772	2.37852	1	0.999695	70.4802
KEGG_PATHWAY	tth00260:Glycine, serine and threonine metabolism	10	1.21803	0.127909	Q72KV4_THET2, KHSE_THET2, Q72GY8_THET2, Q72K32_THET2, AK_THET2, GCST_THET2, GCSPB_THET2, TDH_THET2, Q72LA9_THET2, GLYA_THET2	347	22	1244	1.62955	1	0.468296	79.2179
GOTERM_BP_FAT	GO:0009069~serine family amino acid metabolic process	8	0.974421	0.141764	Q72HL8_THET2, GCSH_THET2, Q72K32_THET2, SYS_THET2, GCST_THET2, GCSPB_THET2, Q72LA9_THET2, GLYA_THET2	447	18	1772	1.76187	1	0.998983	89.4661
GOTERM_BP_FAT	GO:0009063~cellular amino acid catabolic process	7	0.852619	0.193224	Q72HL8_THET2, GCSH_THET2, GCST_THET2, GCSPB_THET2, TDH_THET2, PDXT_THET2, Q72I55_THET2	447	16	1772	1.73434	1	0.998669	95.761
GOTERM_BP_FAT	GO:0016054~organic acid catabolic process	7	0.852619	0.193224	Q72HL8_THET2, GCSH_THET2, GCST_THET2, GCSPB_THET2, TDH_THET2, PDXT_THET2, Q72I55_THET2	447	16	1772	1.73434	1	0.998669	95.761
GOTERM_BP_FAT	GO:0046395~carboxylic acid catabolic process	7	0.852619	0.193224	Q72HL8_THET2, GCSH_THET2, GCST_THET2, GCSPB_THET2, TDH_THET2, PDXT_THET2, Q72I55_THET2	447	16	1772	1.73434	1	0.998669	95.761
GOTERM_BP_FAT	GO:0009310~amine catabolic process	7	0.852619	0.239048	Q72HL8_THET2, GCSH_THET2, GCST_THET2, GCSPB_THET2, TDH_THET2, PDXT_THET2, Q72I55_THET2	447	17	1772	1.63232	1	0.999309	98.2078
GOTERM_BP_FAT	GO:0006546~glycine catabolic process	4	0.487211	0.246825	Q72HL8_THET2, GCSH_THET2, GCST_THET2, GCSPB_THET2	447	7	1772	2.26526	1	0.99927	98.4593
GOTERM_BP_FAT	GO:0009071~serine family amino acid catabolic process	4	0.487211	0.246825	Q72HL8_THET2, GCSH_THET2, GCST_THET2, GCSPB_THET2	447	7	1772	2.26526	1	0.99927	98.4593
Annotation Cluster 16	Enrichment Score: 0.7324415747151823
Category	Term	Count	%	PValue	Genes	List Total	Pop Hits	Pop Total	Fold Enrichment	Bonferroni	Benjamini	FDR
INTERPRO	IPR005475:Transketolase, central region	5	0.609013	0.0985305	ODBB_THET2, Q72GF2_THET2, DXS_THET2, Q72GZ7_THET2, Q72K50_THET2	733	9	3493	2.64742	1	1	81.7623
INTERPRO	IPR005476:Transketolase, C-terminal	4	0.487211	0.224327	ODBB_THET2, Q72GF2_THET2, DXS_THET2, Q72K50_THET2	733	8	3493	2.38267	1	1	98.4506
INTERPRO	IPR015941:Transketolase C-terminal-like	4	0.487211	0.287225	ODBB_THET2, Q72GF2_THET2, DXS_THET2, Q72K50_THET2	733	9	3493	2.11793	1	1	99.613
Annotation Cluster 17	Enrichment Score: 0.6325183550395813
Category	Term	Count	%	PValue	Genes	List Total	Pop Hits	Pop Total	Fold Enrichment	Bonferroni	Benjamini	FDR
KEGG_PATHWAY	tth03430:Mismatch repair	9	1.09622	0.00242377	Q72GP2_THET2, Q72JG9_THET2, Q72I50_THET2, Q72IS0_THET2, MUTL_THET2, Q72GV7_THET2, Q72H86_THET2, Q72HH8_THET2, Q72HA7_THET2	347	11	1244	2.93319	0.252638	0.0357461	2.74726
KEGG_PATHWAY	tth03440:Homologous recombination	9	1.09622	0.0484278	Q72G97_THET2, Q72GP2_THET2, Q72JG9_THET2, RECA_THET2, Q72GV7_THET2, Q72H86_THET2, Q72HH8_THET2, RUVC_THET2, Q72HA7_THET2	347	16	1244	2.01657	0.997412	0.269126	43.4379
KEGG_PATHWAY	tth03030:DNA replication	6	0.730816	0.21998	Q72GP2_THET2, Q72J83_THET2, Q72GV7_THET2, Q72H86_THET2, Q72HH8_THET2, Q72HA7_THET2	347	12	1244	1.79251	1	0.617753	94.2264
GOTERM_MF_FAT	GO:0004527~exonuclease activity	7	0.852619	0.427805	Q72GP2_THET2, Q72JG9_THET2, Q72J56_THET2, Q72K93_THET2, Q72H86_THET2, Q72L57_THET2, PNP_THET2	522	21	2095	1.3378	1	0.999836	99.9742
SP_PIR_KEYWORDS	dna-directed dna polymerase	3	0.365408	0.541833	Q72GP2_THET2, Q72H86_THET2, Q72L57_THET2	821	9	4254	1.72716	1	0.899929	99.9929
SP_PIR_KEYWORDS	dna replication	6	0.730816	0.543612	Q72GP2_THET2, Q72J83_THET2, DNAJ_THET2, Q72GV7_THET2, Q72IK7_THET2, Q72H86_THET2, Q72L57_THET2	821	25	4254	1.24356	1	0.897182	99.9933
GOTERM_BP_FAT	GO:0006260~DNA replication	10	1.21803	0.83723	Q72GP2_THET2, Q72GB7_THET2, Q72I50_THET2, Q72J83_THET2, DNAJ_THET2, Q72GV7_THET2, Q72GR3_THET2, Q72IK7_THET2, Q72H86_THET2, Q72L57_THET2, Q72HA7_THET2	447	45	1772	0.880935	1	0.99996	100
GOTERM_MF_FAT	GO:0003887~DNA-directed DNA polymerase activity	4	0.487211	0.863097	Q72GP2_THET2, Q72H86_THET2, Q72L57_THET2, Q72HA7_THET2	522	18	2095	0.891869	1	1	100
GOTERM_MF_FAT	GO:0034061~DNA polymerase activity	4	0.487211	0.863097	Q72GP2_THET2, Q72H86_THET2, Q72L57_THET2, Q72HA7_THET2	522	18	2095	0.891869	1	1	100
Annotation Cluster 18	Enrichment Score: 0.6101881968402332
Category	Term	Count	%	PValue	Genes	List Total	Pop Hits	Pop Total	Fold Enrichment	Bonferroni	Benjamini	FDR
KEGG_PATHWAY	tth00521:Streptomycin biosynthesis	5	0.609013	0.0540127	Q72GC0_THET2, Q72GT6_THET2, Q72H65_THET2, Q72H07_THET2, Q72K80_THET2	347	6	1244	2.98751	0.998723	0.283342	47.1336
KEGG_PATHWAY	tth00052:Galactose metabolism	6	0.730816	0.344494	Q745T5_THET2, Q72H65_THET2, Q72H07_THET2, Q745T7_THET2, Q72K80_THET2, Q72L37_THET2	347	14	1244	1.53643	1	0.745836	99.2158
KEGG_PATHWAY	tth00500:Starch and sucrose metabolism	4	0.487211	0.793886	Q72H65_THET2, Q72H07_THET2, Q72J82_THET2, Q72K80_THET2	347	14	1244	1.02429	1	0.972008	100
Annotation Cluster 19	Enrichment Score: 0.5870001800963947
Category	Term	Count	%	PValue	Genes	List Total	Pop Hits	Pop Total	Fold Enrichment	Bonferroni	Benjamini	FDR
SMART	SM00382:AAA	31	3.77588	0.0483896	Q72IK4_THET2, Q72KU9_THET2, RECA_THET2, Q72GR3_THET2, Q72GK4_THET2, CLPX_THET2, Q72I66_THET2, Q72J51_THET2, Q72J05_THET2, Q72HK4_THET2, Q72I50_THET2, Q72J43_THET2, Q72L01_THET2, Q72LM3_THET2, Q72L45_THET2, Q72L87_THET2, Q72J04_THET2, Q72H74_THET2, Q72GB4_THET2, CLPB_THET2, Q72IQ7_THET2, Q72JH7_THET2, Q72HA7_THET2, Q72IN7_THET2, Q72HG0_THET2, Q72LI8_THET2, Q72LF8_THET2, Q72J12_THET2, Q72LJ1_THET2,…	108	119	552	1.33147	0.962129	0.962129	39.7776
INTERPRO	IPR003593:ATPase, AAA+ type, core	31	3.77588	0.148146	Q72IK4_THET2, Q72KU9_THET2, RECA_THET2, Q72GR3_THET2, Q72GK4_THET2, CLPX_THET2, Q72I66_THET2, Q72J51_THET2, Q72J05_THET2, Q72HK4_THET2, Q72I50_THET2, Q72J43_THET2, Q72L01_THET2, Q72LM3_THET2, Q72L45_THET2, Q72L87_THET2, Q72J04_THET2, Q72H74_THET2, Q72GB4_THET2, CLPB_THET2, Q72IQ7_THET2, Q72JH7_THET2, Q72HA7_THET2, Q72IN7_THET2, Q72HG0_THET2, Q72LI8_THET2, Q72LF8_THET2, Q72J12_THET2, Q72LJ1_THET2,…	733	119	3493	1.24139	1	1	92.7949
INTERPRO	IPR003439:ABC transporter-like	18	2.19245	0.472295	Q72KU9_THET2, Q72J04_THET2, Q72GB4_THET2, Q72I66_THET2, Q72IQ7_THET2, Q72JH7_THET2, Q72J51_THET2, Q72IN7_THET2, Q72J05_THET2, Q72HG0_THET2, Q72HK4_THET2, Q72LI8_THET2, Q72LF8_THET2, Q72J43_THET2, Q72J12_THET2, Q72HK0_THET2, Q72KS2_THET2, Q72JN6_THET2, Q72L45_THET2	733	78	3493	1.0997	1	1	99.9972
INTERPRO	IPR017871:ABC transporter, conserved site	15	1.82704	0.503337	Q72KU9_THET2, Q72J04_THET2, Q72GB4_THET2, Q72I66_THET2, Q72JH7_THET2, Q72IQ7_THET2, Q72J51_THET2, Q72HG0_THET2, Q72HK4_THET2, Q72LI8_THET2, Q72LF8_THET2, Q72J43_THET2, Q72HK0_THET2, Q72KS2_THET2, Q72JN6_THET2	733	65	3493	1.0997	1	1	99.999
GOTERM_MF_FAT	GO:0016887~ATPase activity	32	3.89769	0.681532	Q72KU9_THET2, RECA_THET2, CLPX_THET2, Q72I66_THET2, Q72KH0_THET2, Q72J51_THET2, Q72J05_THET2, Q72HK4_THET2, Q72J43_THET2, Q72L01_THET2, Q72HK0_THET2, Q72KF9_THET2, Q72L45_THET2, Q72G97_THET2, VATB_THET2, VATA_THET2, Q72J04_THET2, VATE_THET2, Q72GB4_THET2, Q72KB4_THET2, Q72IQ7_THET2, Q72JH7_THET2, Q72IN7_THET2, VATD_THET2, Q72JA0_THET2, Q72HG0_THET2, Q72LI8_THET2, CBID_THET2, Q72IS0_THET2, Q72LF8_…	522	132	2095	0.972948	1	0.999984	100
Annotation Cluster 20	Enrichment Score: 0.5733993693388839
Category	Term	Count	%	PValue	Genes	List Total	Pop Hits	Pop Total	Fold Enrichment	Bonferroni	Benjamini	FDR
KEGG_PATHWAY	tth00250:Alanine, aspartate and glutamate metabolism	9	1.09622	0.204196	Q72IC1_THET2, GLMS_THET2, CARB_THET2, Q72GS8_THET2, CARA_THET2, Q72IC0_THET2, Q72KD6_THET2, Q72IM8_THET2, Q72IH6_THET2	347	21	1244	1.53643	1	0.598927	92.7336
KEGG_PATHWAY	tth00910:Nitrogen metabolism	5	0.609013	0.221367	Q72IC1_THET2, GCST_THET2, Q72KM0_THET2, Q72IC0_THET2, Q72IM8_THET2	347	9	1244	1.99167	1	0.608711	94.3432
GOTERM_MF_FAT	GO:0016638~oxidoreductase activity, acting on the CH-NH2 group of donors	6	0.730816	0.308776	Q72IC1_THET2, Q72GS8_THET2, GCSPB_THET2, Q72LA9_THET2, Q72IC0_THET2, Q72IM8_THET2	522	15	2095	1.60536	1	0.999113	99.5769
GOTERM_MF_FAT	GO:0016639~oxidoreductase activity, acting on the CH-NH2 group of donors, NAD or NADP as acceptor	3	0.365408	0.364416	Q72IC1_THET2, Q72IC0_THET2, Q72IM8_THET2	522	5	2095	2.40805	1	0.999532	99.8778
Annotation Cluster 21	Enrichment Score: 0.5683407327874835
Category	Term	Count	%	PValue	Genes	List Total	Pop Hits	Pop Total	Fold Enrichment	Bonferroni	Benjamini	FDR
GOTERM_BP_FAT	GO:0009150~purine ribonucleotide metabolic process	17	2.07065	0.125824	Q72H76_THET2, VATB_THET2, VATA_THET2, Q72K86_THET2, PURL_THET2, Q72J68_THET2, VATE_THET2, Q72LJ5_THET2, Q72LL5_THET2, PURQ_THET2, VATC_THET2, VATD_THET2, NDK_THET2, GUAA_THET2, Q72KF9_THET2, Q72J67_THET2, Q72LC2_THET2	447	48	1772	1.40399	1	0.999226	86.1883
GOTERM_BP_FAT	GO:0009259~ribonucleotide metabolic process	18	2.19245	0.135086	Q72H76_THET2, VATB_THET2, VATA_THET2, Q72IE8_THET2, Q72K86_THET2, PURL_THET2, Q72J68_THET2, VATE_THET2, Q72LJ5_THET2, Q72LL5_THET2, PURQ_THET2, VATC_THET2, VATD_THET2, NDK_THET2, GUAA_THET2, Q72KF9_THET2, Q72J67_THET2, Q72LC2_THET2	447	52	1772	1.37223	1	0.999164	88.1929
GOTERM_BP_FAT	GO:0009152~purine ribonucleotide biosynthetic process	16	1.94884	0.157031	Q72H76_THET2, VATB_THET2, VATA_THET2, Q72K86_THET2, PURL_THET2, Q72J68_THET2, VATE_THET2, Q72LJ5_THET2, PURQ_THET2, VATC_THET2, VATD_THET2, NDK_THET2, GUAA_THET2, Q72KF9_THET2, Q72J67_THET2, Q72LC2_THET2	447	46	1772	1.37885	1	0.998736	91.9122
GOTERM_BP_FAT	GO:0009260~ribonucleotide biosynthetic process	17	2.07065	0.166937	Q72H76_THET2, VATB_THET2, VATA_THET2, Q72IE8_THET2, Q72K86_THET2, PURL_THET2, Q72J68_THET2, VATE_THET2, Q72LJ5_THET2, PURQ_THET2, VATC_THET2, VATD_THET2, NDK_THET2, GUAA_THET2, Q72KF9_THET2, Q72J67_THET2, Q72LC2_THET2	447	50	1772	1.34783	1	0.997384	93.2039
SP_PIR_KEYWORDS	purine biosynthesis	6	0.730816	0.180154	Q72H76_THET2, Q72K86_THET2, PURL_THET2, Q72LJ5_THET2, GUAA_THET2, PURQ_THET2	821	16	4254	1.94306	1	0.627501	91.2216
GOTERM_BP_FAT	GO:0006163~purine nucleotide metabolic process	18	2.19245	0.198765	Q72H76_THET2, VATB_THET2, VATA_THET2, Q72K86_THET2, PURL_THET2, Q72J68_THET2, VATE_THET2, Q72LJ5_THET2, Q72LL5_THET2, PURQ_THET2, VATC_THET2, VATD_THET2, NDK_THET2, KGUA_THET2, GUAA_THET2, Q72KF9_THET2, Q72J67_THET2, Q72LC2_THET2	447	55	1772	1.29738	1	0.998486	96.17
GOTERM_BP_FAT	GO:0009127~purine nucleoside monophosphate biosynthetic process	7	0.852619	0.239048	Q72H76_THET2, Q72K86_THET2, PURL_THET2, Q72LJ5_THET2, GUAA_THET2, PURQ_THET2, Q72LC2_THET2	447	17	1772	1.63232	1	0.999309	98.2078
GOTERM_BP_FAT	GO:0009126~purine nucleoside monophosphate metabolic process	7	0.852619	0.239048	Q72H76_THET2, Q72K86_THET2, PURL_THET2, Q72LJ5_THET2, GUAA_THET2, PURQ_THET2, Q72LC2_THET2	447	17	1772	1.63232	1	0.999309	98.2078
GOTERM_BP_FAT	GO:0009167~purine ribonucleoside monophosphate metabolic process	7	0.852619	0.239048	Q72H76_THET2, Q72K86_THET2, PURL_THET2, Q72LJ5_THET2, GUAA_THET2, PURQ_THET2, Q72LC2_THET2	447	17	1772	1.63232	1	0.999309	98.2078
GOTERM_BP_FAT	GO:0009168~purine ribonucleoside monophosphate biosynthetic process	7	0.852619	0.239048	Q72H76_THET2, Q72K86_THET2, PURL_THET2, Q72LJ5_THET2, GUAA_THET2, PURQ_THET2, Q72LC2_THET2	447	17	1772	1.63232	1	0.999309	98.2078
GOTERM_BP_FAT	GO:0009156~ribonucleoside monophosphate biosynthetic process	8	0.974421	0.261409	Q72H76_THET2, Q72IE8_THET2, Q72K86_THET2, PURL_THET2, Q72LJ5_THET2, GUAA_THET2, PURQ_THET2, Q72LC2_THET2	447	21	1772	1.51017	1	0.999388	98.8447
GOTERM_BP_FAT	GO:0009161~ribonucleoside monophosphate metabolic process	8	0.974421	0.261409	Q72H76_THET2, Q72IE8_THET2, Q72K86_THET2, PURL_THET2, Q72LJ5_THET2, GUAA_THET2, PURQ_THET2, Q72LC2_THET2	447	21	1772	1.51017	1	0.999388	98.8447
GOTERM_BP_FAT	GO:0006164~purine nucleotide biosynthetic process	16	1.94884	0.316513	Q72H76_THET2, VATB_THET2, VATA_THET2, Q72K86_THET2, PURL_THET2, Q72J68_THET2, VATE_THET2, Q72LJ5_THET2, PURQ_THET2, VATC_THET2, VATD_THET2, NDK_THET2, GUAA_THET2, Q72KF9_THET2, Q72J67_THET2, Q72LC2_THET2	447	52	1772	1.21976	1	0.999409	99.631
GOTERM_BP_FAT	GO:0009124~nucleoside monophosphate biosynthetic process	8	0.974421	0.399854	Q72H76_THET2, Q72IE8_THET2, Q72K86_THET2, PURL_THET2, Q72LJ5_THET2, GUAA_THET2, PURQ_THET2, Q72LC2_THET2	447	24	1772	1.3214	1	0.999049	99.9456
GOTERM_BP_FAT	GO:0009123~nucleoside monophosphate metabolic process	8	0.974421	0.399854	Q72H76_THET2, Q72IE8_THET2, Q72K86_THET2, PURL_THET2, Q72LJ5_THET2, GUAA_THET2, PURQ_THET2, Q72LC2_THET2	447	24	1772	1.3214	1	0.999049	99.9456
GOTERM_BP_FAT	GO:0006188~IMP biosynthetic process	5	0.609013	0.484889	Q72H76_THET2, Q72K86_THET2, PURL_THET2, PURQ_THET2, Q72LC2_THET2	447	14	1772	1.41579	1	0.998908	99.9943
GOTERM_BP_FAT	GO:0046040~IMP metabolic process	5	0.609013	0.484889	Q72H76_THET2, Q72K86_THET2, PURL_THET2, PURQ_THET2, Q72LC2_THET2	447	14	1772	1.41579	1	0.998908	99.9943
GOTERM_BP_FAT	GO:0009165~nucleotide biosynthetic process	23	2.80146	0.557605	Q72H76_THET2, PYRE_THET2, KAD_THET2, VATB_THET2, NADD_THET2, VATA_THET2, CARB_THET2, Q72IE8_THET2, Q72K86_THET2, PURL_THET2, Q72J68_THET2, VATE_THET2, Q72LJ5_THET2, PURQ_THET2, VATC_THET2, VATD_THET2, NDK_THET2, PYRF_THET2, CARA_THET2, GUAA_THET2, Q72KF9_THET2, Q72J67_THET2, Q72LC2_THET2	447	88	1772	1.0361	1	0.999359	99.9994
GOTERM_BP_FAT	GO:0006189~'de novo' IMP biosynthetic process	4	0.487211	0.673353	Q72H76_THET2, PURL_THET2, PURQ_THET2, Q72LC2_THET2	447	13	1772	1.21976	1	0.999776	100
Annotation Cluster 22	Enrichment Score: 0.5406931488177834
Category	Term	Count	%	PValue	Genes	List Total	Pop Hits	Pop Total	Fold Enrichment	Bonferroni	Benjamini	FDR
KEGG_PATHWAY	tth00550:Peptidoglycan biosynthesis	9	1.09622	0.00552253	Q72JQ4_THET2, UPPP_THET2, Q72JQ5_THET2, Q72J59_THET2, Q72GE4_THET2, MURD_THET2, MURG_THET2, Q72JP8_THET2, DDL_THET2	347	12	1244	2.68876	0.48549	0.0642941	6.15922
GOTERM_MF_FAT	GO:0016881~acid-amino acid ligase activity	9	1.09622	0.0745036	Q72JQ4_THET2, PANC_THET2, Q72GE4_THET2, Q72J06_THET2, Q72H55_THET2, MURD_THET2, Q72ID7_THET2, Q72JP8_THET2, DDL_THET2	522	19	2095	1.90109	1	0.973406	68.2043
INTERPRO	IPR004101:Mur ligase, C-terminal	6	0.730816	0.085589	Q72JQ4_THET2, Q72GE4_THET2, Q72J06_THET2, Q72H55_THET2, MURD_THET2, Q72JP8_THET2	733	12	3493	2.38267	1	1	76.9578
INTERPRO	IPR013221:Mur ligase, central	6	0.730816	0.085589	Q72JQ4_THET2, Q72GE4_THET2, Q72J06_THET2, Q72H55_THET2, MURD_THET2, Q72JP8_THET2	733	12	3493	2.38267	1	1	76.9578
SP_PIR_KEYWORDS	cell cycle	7	0.852619	0.172269	Q72JQ4_THET2, Q72JP4_THET2, Q72GE4_THET2, MURD_THET2, MURG_THET2, Q72JB5_THET2, TIG_THET2	821	20	4254	1.81352	1	0.619999	90.1298
SP_PIR_KEYWORDS	cell wall biogenesis/degradation	7	0.852619	0.273801	Q72JQ4_THET2, UPPP_THET2, Q72GE4_THET2, Q72JF3_THET2, MURD_THET2, MURG_THET2, DDL_THET2	821	23	4254	1.57697	1	0.734311	98.0128
SP_PIR_KEYWORDS	cell shape	7	0.852619	0.273801	Q72JQ4_THET2, UPPP_THET2, Q72GE4_THET2, Q72JF3_THET2, MURD_THET2, MURG_THET2, DDL_THET2	821	23	4254	1.57697	1	0.734311	98.0128
SP_PIR_KEYWORDS	peptidoglycan synthesis	7	0.852619	0.273801	Q72JQ4_THET2, UPPP_THET2, Q72GE4_THET2, Q72JF3_THET2, MURD_THET2, MURG_THET2, DDL_THET2	821	23	4254	1.57697	1	0.734311	98.0128
PIR_SUPERFAMILY	PIRSF001562:UDP-N-acetylmuramate-alanine ligase	4	0.487211	0.282894	Q72JQ4_THET2, Q72GE4_THET2, MURD_THET2, Q72JP8_THET2	505	8	2150	2.12871	1	1	99.2193
GOTERM_BP_FAT	GO:0000270~peptidoglycan metabolic process	11	1.33983	0.30587	Q72JQ4_THET2, UPPP_THET2, Q72JN2_THET2, Q72GE4_THET2, Q72KA2_THET2, Q72JF3_THET2, MURD_THET2, Q72IX5_THET2, MURG_THET2, Q72JP8_THET2, DDL_THET2	447	33	1772	1.3214	1	0.999375	99.5368
GOTERM_BP_FAT	GO:0006022~aminoglycan metabolic process	11	1.33983	0.30587	Q72JQ4_THET2, UPPP_THET2, Q72JN2_THET2, Q72GE4_THET2, Q72KA2_THET2, Q72JF3_THET2, MURD_THET2, Q72IX5_THET2, MURG_THET2, Q72JP8_THET2, DDL_THET2	447	33	1772	1.3214	1	0.999375	99.5368
GOTERM_BP_FAT	GO:0030203~glycosaminoglycan metabolic process	11	1.33983	0.30587	Q72JQ4_THET2, UPPP_THET2, Q72JN2_THET2, Q72GE4_THET2, Q72KA2_THET2, Q72JF3_THET2, MURD_THET2, Q72IX5_THET2, MURG_THET2, Q72JP8_THET2, DDL_THET2	447	33	1772	1.3214	1	0.999375	99.5368
INTERPRO	IPR000713:Mur ligase, N-terminal	3	0.365408	0.368145	Q72JQ4_THET2, Q72GE4_THET2, Q72JP8_THET2	733	6	3493	2.38267	1	1	99.9464
GOTERM_BP_FAT	GO:0022604~regulation of cell morphogenesis	10	1.21803	0.373968	Q72JQ4_THET2, UPPP_THET2, Q72GE4_THET2, Q72JA2_THET2, Q72JF3_THET2, MURD_THET2, Q72JE5_THET2, MURG_THET2, Q72JP8_THET2, DDL_THET2	447	31	1772	1.27878	1	0.998953	99.8987
GOTERM_BP_FAT	GO:0008360~regulation of cell shape	10	1.21803	0.373968	Q72JQ4_THET2, UPPP_THET2, Q72GE4_THET2, Q72JA2_THET2, Q72JF3_THET2, MURD_THET2, Q72JE5_THET2, MURG_THET2, Q72JP8_THET2, DDL_THET2	447	31	1772	1.27878	1	0.998953	99.8987
GOTERM_BP_FAT	GO:0009273~peptidoglycan-based cell wall biogenesis	10	1.21803	0.414928	Q72JQ4_THET2, UPPP_THET2, Q72JN2_THET2, Q72JQ5_THET2, Q72GE4_THET2, Q72JF3_THET2, MURD_THET2, MURG_THET2, Q72JP8_THET2, DDL_THET2	447	32	1772	1.23881	1	0.998748	99.9626
GOTERM_BP_FAT	GO:0042546~cell wall biogenesis	10	1.21803	0.414928	Q72JQ4_THET2, UPPP_THET2, Q72JN2_THET2, Q72JQ5_THET2, Q72GE4_THET2, Q72JF3_THET2, MURD_THET2, MURG_THET2, Q72JP8_THET2, DDL_THET2	447	32	1772	1.23881	1	0.998748	99.9626
GOTERM_BP_FAT	GO:0009252~peptidoglycan biosynthetic process	9	1.09622	0.451732	Q72JQ4_THET2, UPPP_THET2, Q72JN2_THET2, Q72GE4_THET2, Q72JF3_THET2, MURD_THET2, MURG_THET2, Q72JP8_THET2, DDL_THET2	447	29	1772	1.23027	1	0.998855	99.9856
GOTERM_BP_FAT	GO:0006023~aminoglycan biosynthetic process	9	1.09622	0.451732	Q72JQ4_THET2, UPPP_THET2, Q72JN2_THET2, Q72GE4_THET2, Q72JF3_THET2, MURD_THET2, MURG_THET2, Q72JP8_THET2, DDL_THET2	447	29	1772	1.23027	1	0.998855	99.9856
GOTERM_BP_FAT	GO:0006024~glycosaminoglycan biosynthetic process	9	1.09622	0.451732	Q72JQ4_THET2, UPPP_THET2, Q72JN2_THET2, Q72GE4_THET2, Q72JF3_THET2, MURD_THET2, MURG_THET2, Q72JP8_THET2, DDL_THET2	447	29	1772	1.23027	1	0.998855	99.9856
GOTERM_BP_FAT	GO:0010382~cellular cell wall macromolecule metabolic process	9	1.09622	0.451732	Q72JQ4_THET2, UPPP_THET2, Q72JN2_THET2, Q72GE4_THET2, Q72JF3_THET2, MURD_THET2, MURG_THET2, Q72JP8_THET2, DDL_THET2	447	29	1772	1.23027	1	0.998855	99.9856
GOTERM_BP_FAT	GO:0044038~cell wall macromolecule biosynthetic process	9	1.09622	0.451732	Q72JQ4_THET2, UPPP_THET2, Q72JN2_THET2, Q72GE4_THET2, Q72JF3_THET2, MURD_THET2, MURG_THET2, Q72JP8_THET2, DDL_THET2	447	29	1772	1.23027	1	0.998855	99.9856
GOTERM_BP_FAT	GO:0070589~cellular component macromolecule biosynthetic process	9	1.09622	0.451732	Q72JQ4_THET2, UPPP_THET2, Q72JN2_THET2, Q72GE4_THET2, Q72JF3_THET2, MURD_THET2, MURG_THET2, Q72JP8_THET2, DDL_THET2	447	29	1772	1.23027	1	0.998855	99.9856
GOTERM_BP_FAT	GO:0044036~cell wall macromolecule metabolic process	10	1.21803	0.455825	Q72JQ4_THET2, UPPP_THET2, Q72GX9_THET2, Q72JN2_THET2, Q72GE4_THET2, Q72JF3_THET2, MURD_THET2, MURG_THET2, Q72JP8_THET2, DDL_THET2	447	33	1772	1.20127	1	0.998644	99.9871
GOTERM_BP_FAT	GO:0005976~polysaccharide metabolic process	14	1.70524	0.467336	UPPP_THET2, Q72GE4_THET2, Q72KZ1_THET2, MURD_THET2, Q72HU6_THET2, Q72IX5_THET2, DDL_THET2, Q72JQ4_THET2, Q72JN2_THET2, Q72KA2_THET2, Q72JF3_THET2, MURG_THET2, Q72JP8_THET2, FABZ_THET2	447	49	1772	1.13263	1	0.998782	99.9906
GOTERM_CC_FAT	GO:0005618~cell wall	5	0.609013	0.488477	Q72KF0_THET2, Q72JA2_THET2, Q72JF3_THET2, MURG_THET2, DDL_THET2	127	14	499	1.40326	1	0.979516	99.8731
GOTERM_BP_FAT	GO:0016051~carbohydrate biosynthetic process	17	2.07065	0.503221	Q72K29_THET2, TPIS_THET2, UPPP_THET2, Q72KV4_THET2, Q72KZ1_THET2, Q72GE4_THET2, MURD_THET2, DDL_THET2, Q72JQ4_THET2, Q72JN2_THET2, GPDA_THET2, GLMS_THET2, Q72JF3_THET2, MURG_THET2, Q72JP8_THET2, FABZ_THET2, Q72K30_THET2	447	62	1772	1.08696	1	0.998656	99.9966
GOTERM_BP_FAT	GO:0045229~external encapsulating structure organization	7	0.852619	0.539716	Q72JQ4_THET2, UPPP_THET2, Q72GE4_THET2, Q72JF3_THET2, MURD_THET2, MURG_THET2, DDL_THET2	447	23	1772	1.2065	1	0.999179	99.9989
GOTERM_BP_FAT	GO:0007047~cell wall organization	7	0.852619	0.539716	Q72JQ4_THET2, UPPP_THET2, Q72GE4_THET2, Q72JF3_THET2, MURD_THET2, MURG_THET2, DDL_THET2	447	23	1772	1.2065	1	0.999179	99.9989
GOTERM_BP_FAT	GO:0000271~polysaccharide biosynthetic process	11	1.33983	0.606775	Q72JQ4_THET2, UPPP_THET2, Q72JN2_THET2, Q72GE4_THET2, Q72KZ1_THET2, Q72JF3_THET2, MURD_THET2, MURG_THET2, Q72JP8_THET2, FABZ_THET2, DDL_THET2	447	41	1772	1.06357	1	0.999549	99.9999
Annotation Cluster 23	Enrichment Score: 0.5210444748774171
Category	Term	Count	%	PValue	Genes	List Total	Pop Hits	Pop Total	Fold Enrichment	Bonferroni	Benjamini	FDR
SP_PIR_KEYWORDS	gtp-binding	9	1.09622	0.132115	EFTU_THET2, Q72JP4_THET2, OBG_THET2, IF2_THET2, EFG_THET2, Q72JS1_THET2, MNME_THET2, Y1664_THET2	821	27	4254	1.72716	1	0.537206	82.368
INTERPRO	IPR005225:Small GTP-binding protein	6	0.730816	0.189338	EFTU_THET2, OBG_THET2, IF2_THET2, EFG_THET2, MNME_THET2	733	15	3493	1.90614	1	1	96.8047
GOTERM_MF_FAT	GO:0019001~guanyl nucleotide binding	13	1.58343	0.215198	EFTU_THET2, Q72JP4_THET2, OBG_THET2, IF2_THET2, EFG_THET2, Q72JS1_THET2, Q72IH4_THET2, Q72LJ1_THET2, MNME_THET2, Q72JU4_THET2, Y1664_THET2, Q72JF0_THET2	522	38	2095	1.37301	1	0.995771	97.2297
GOTERM_MF_FAT	GO:0005525~GTP binding	13	1.58343	0.215198	EFTU_THET2, Q72JP4_THET2, OBG_THET2, IF2_THET2, EFG_THET2, Q72JS1_THET2, Q72IH4_THET2, Q72LJ1_THET2, MNME_THET2, Q72JU4_THET2, Y1664_THET2, Q72JF0_THET2	522	38	2095	1.37301	1	0.995771	97.2297
GOTERM_MF_FAT	GO:0032561~guanyl ribonucleotide binding	13	1.58343	0.215198	EFTU_THET2, Q72JP4_THET2, OBG_THET2, IF2_THET2, EFG_THET2, Q72JS1_THET2, Q72IH4_THET2, Q72LJ1_THET2, MNME_THET2, Q72JU4_THET2, Y1664_THET2, Q72JF0_THET2	522	38	2095	1.37301	1	0.995771	97.2297
GOTERM_MF_FAT	GO:0003924~GTPase activity	7	0.852619	0.229943	EFTU_THET2, Q72JP4_THET2, IF2_THET2, EFG_THET2, Q72IH4_THET2, MNME_THET2	522	17	2095	1.65258	1	0.99586	97.9077
UP_SEQ_FEATURE	nucleotide phosphate-binding region:GTP	7	0.852619	0.307509	EFTU_THET2, OBG_THET2, IF2_THET2, EFG_THET2, MNME_THET2, Y1664_THET2	185	15	593	1.49586	1	1	99.3244
GOTERM_BP_FAT	GO:0006414~translational elongation	4	0.487211	0.404079	EFTU_THET2, EFG_THET2, EFTS_THET2	447	9	1772	1.76187	1	0.998986	99.951
INTERPRO	IPR004161:Translation elongation factor EFTu/EF1A, domain 2	4	0.487211	0.414378	EFTU_THET2, IF2_THET2, EFG_THET2	733	11	3493	1.73285	1	1	99.9846
SP_PIR_KEYWORDS	elongation factor	4	0.487211	0.415948	EFTU_THET2, EFG_THET2, EFTS_THET2	821	12	4254	1.72716	1	0.840343	99.8621
INTERPRO	IPR000795:Protein synthesis factor, GTP-binding	4	0.487211	0.475455	EFTU_THET2, IF2_THET2, EFG_THET2	733	12	3493	1.58845	1	1	99.9975
GOTERM_MF_FAT	GO:0008135~translation factor activity, nucleic acid binding	6	0.730816	0.476325	EFTU_THET2, IF2_THET2, EFG_THET2, Q72GJ6_THET2, EFTS_THET2	522	18	2095	1.3378	1	0.999871	99.993
GOTERM_MF_FAT	GO:0003746~translation elongation factor activity	4	0.487211	0.605797	EFTU_THET2, EFG_THET2, EFTS_THET2	522	12	2095	1.3378	1	0.999967	99.9999
Annotation Cluster 24	Enrichment Score: 0.519304534850032
Category	Term	Count	%	PValue	Genes	List Total	Pop Hits	Pop Total	Fold Enrichment	Bonferroni	Benjamini	FDR
KEGG_PATHWAY	tth00250:Alanine, aspartate and glutamate metabolism	9	1.09622	0.204196	Q72IC1_THET2, GLMS_THET2, CARB_THET2, Q72GS8_THET2, CARA_THET2, Q72IC0_THET2, Q72KD6_THET2, Q72IM8_THET2, Q72IH6_THET2	347	21	1244	1.53643	1	0.598927	92.7336
INTERPRO	IPR000583:Glutamine amidotransferase, class-II	3	0.365408	0.368145	GLMS_THET2, Q72IM8_THET2, Q72IH6_THET2	733	6	3493	2.38267	1	1	99.9464
INTERPRO	IPR017932:Glutamine amidotransferase, type II	3	0.365408	0.368145	GLMS_THET2, Q72IM8_THET2, Q72IH6_THET2	733	6	3493	2.38267	1	1	99.9464
Annotation Cluster 25	Enrichment Score: 0.5015195317579119
Category	Term	Count	%	PValue	Genes	List Total	Pop Hits	Pop Total	Fold Enrichment	Bonferroni	Benjamini	FDR
INTERPRO	IPR014721:Ribosomal protein S5 domain 2-type fold	6	0.730816	0.230889	KHSE_THET2, EFG_THET2, ISPE_THET2, RS5_THET2, RS9_THET2, Q72L37_THET2	733	16	3493	1.78701	1	1	98.6521
INTERPRO	IPR013750:GHMP kinase, C-terminal	3	0.365408	0.368145	KHSE_THET2, ISPE_THET2, Q72L37_THET2	733	6	3493	2.38267	1	1	99.9464
INTERPRO	IPR006204:GHMP kinase	3	0.365408	0.368145	KHSE_THET2, ISPE_THET2, Q72L37_THET2	733	6	3493	2.38267	1	1	99.9464
Annotation Cluster 26	Enrichment Score: 0.491510142785989
Category	Term	Count	%	PValue	Genes	List Total	Pop Hits	Pop Total	Fold Enrichment	Bonferroni	Benjamini	FDR
INTERPRO	IPR000878:Tetrapyrrole methylase	6	0.730816	0.150816	Q746P0_THET2, Q746P2_THET2, Q746P3_THET2, Q746N6_THET2, Q746P1_THET2, Q72H97_THET2	733	14	3493	2.04229	1	1	93.1566
INTERPRO	IPR014777:Tetrapyrrole methylase, subdomain 1	6	0.730816	0.150816	Q746P0_THET2, Q746P2_THET2, Q746P3_THET2, Q746N6_THET2, Q746P1_THET2, Q72H97_THET2	733	14	3493	2.04229	1	1	93.1566
INTERPRO	IPR003043:Uroporphiryn-III C-methyltransferase, conserved site	3	0.365408	0.524602	Q746P2_THET2, Q746N6_THET2, Q746P1_THET2	733	8	3493	1.78701	1	1	99.9995
INTERPRO	IPR014776:Tetrapyrrole methylase, subdomain 2	3	0.365408	0.524602	Q746N6_THET2, Q746P1_THET2, Q72H97_THET2	733	8	3493	1.78701	1	1	99.9995
SP_PIR_KEYWORDS	s-adenosyl-l-methionine	8	0.974421	0.557053	TRMD_THET2, TRMI_THET2, LIPA_THET2, Q746P2_THET2, RSMG_THET2, Q746N6_THET2, Q746P1_THET2, Q72H97_THET2	821	36	4254	1.15144	1	0.901998	99.9953
Annotation Cluster 27	Enrichment Score: 0.48607249978040296
Category	Term	Count	%	PValue	Genes	List Total	Pop Hits	Pop Total	Fold Enrichment	Bonferroni	Benjamini	FDR
SP_PIR_KEYWORDS	glutamine amidotransferase	7	0.852619	0.11537	GLMS_THET2, CARA_THET2, Q746Q1_THET2, GUAA_THET2, PDXT_THET2, Q746N0_THET2, PURQ_THET2	821	18	4254	2.01502	1	0.49745	77.7181
GOTERM_MF_FAT	GO:0016884~carbon-nitrogen ligase activity, with glutamine as amido-N-donor	8	0.974421	0.135024	CARB_THET2, GATA_THET2, PURL_THET2, CARA_THET2, GUAA_THET2, PURQ_THET2, GATB_THET2, Q72HP0_THET2	522	18	2095	1.78374	1	0.985102	88.3129
GOTERM_BP_FAT	GO:0006541~glutamine metabolic process	7	0.852619	0.440643	GLMS_THET2, CARA_THET2, Q746Q1_THET2, GUAA_THET2, PDXT_THET2, Q746N0_THET2, PURQ_THET2	447	21	1772	1.3214	1	0.998896	99.9807
INTERPRO	IPR017926:Glutamine amidotransferase type 1	3	0.365408	0.705705	CARA_THET2, GUAA_THET2, PURQ_THET2	733	11	3493	1.29964	1	1	100
UP_SEQ_FEATURE	domain:Glutamine amidotransferase type-1	3	0.365408	0.766347	CARA_THET2, GUAA_THET2, PURQ_THET2	185	8	593	1.20203	1	1	100
Annotation Cluster 28	Enrichment Score: 0.482336152888526
Category	Term	Count	%	PValue	Genes	List Total	Pop Hits	Pop Total	Fold Enrichment	Bonferroni	Benjamini	FDR
SP_PIR_KEYWORDS	metal-binding	54	6.57734	0.00809341	LYSK_THET2, Q72KC7_THET2, Q72LJ5_THET2, RUVC_THET2, LEU3_THET2, ENO_THET2, FPG_THET2, NDK_THET2, HISX_THET2, SYFB_THET2, Q72J83_THET2, Q72H65_THET2, NPD_THET2, DEF_THET2, Q72LB5_THET2, GLMM_THET2, TGT_THET2, SYI_THET2, ODBA_THET2, ILVD_THET2, DDL_THET2, HEMH_THET2, Q72GD4_THET2, DNAJ_THET2, LEUC_THET2, PSUG_THET2, Q746J6_THET2, Q72GR2_THET2, SYT_THET2, ACCD_THET2, Q72KM0_THET2, RS4_THET2, Q72I26_…	821	202	4254	1.38515	0.756827	0.0845815	9.47364
GOTERM_MF_FAT	GO:0046872~metal ion binding	87	10.5968	0.796474	Q72LK4_THET2, LYSK_THET2, Q72IG9_THET2, MIAA_THET2, Q72LJ5_THET2, APGM_THET2, RUVC_THET2, LEU3_THET2, FPG_THET2, ENO_THET2, Q72JG2_THET2, NDK_THET2, Q72JG9_THET2, SYFB_THET2, HISX_THET2, Q72J83_THET2, Q72H65_THET2, NPD_THET2, DEF_THET2, Q72LB5_THET2, Q72KF9_THET2, Q72H24_THET2, HSLO_THET2, Q72JI3_THET2, GLMM_THET2, Q72K12_THET2, TGT_THET2, Q72G87_THET2, Q746P5_THET2, Q72LL5_THET2, SYI_THET2, ODBA…	522	369	2095	0.946251	1	0.999998	100
GOTERM_MF_FAT	GO:0043169~cation binding	90	10.9622	0.819323	Q72LK4_THET2, LYSK_THET2, Q72IG9_THET2, MIAA_THET2, Q72LJ5_THET2, APGM_THET2, RUVC_THET2, LEU3_THET2, FPG_THET2, ENO_THET2, Q72JG2_THET2, NDK_THET2, Q72JG9_THET2, SYFB_THET2, HISX_THET2, Q72J83_THET2, Q72H65_THET2, NPD_THET2, DEF_THET2, Q72LB5_THET2, Q72KF9_THET2, Q72H24_THET2, HSLO_THET2, Q745T5_THET2, Q72JI3_THET2, GLMM_THET2, Q72K12_THET2, TGT_THET2, Q72G87_THET2, Q746P5_THET2, Q72LL5_THET2, S…	522	384	2095	0.940643	1	0.999999	100
GOTERM_MF_FAT	GO:0043167~ion binding	90	10.9622	0.819323	Q72LK4_THET2, LYSK_THET2, Q72IG9_THET2, MIAA_THET2, Q72LJ5_THET2, APGM_THET2, RUVC_THET2, LEU3_THET2, FPG_THET2, ENO_THET2, Q72JG2_THET2, NDK_THET2, Q72JG9_THET2, SYFB_THET2, HISX_THET2, Q72J83_THET2, Q72H65_THET2, NPD_THET2, DEF_THET2, Q72LB5_THET2, Q72KF9_THET2, Q72H24_THET2, HSLO_THET2, Q745T5_THET2, Q72JI3_THET2, GLMM_THET2, Q72K12_THET2, TGT_THET2, Q72G87_THET2, Q746P5_THET2, Q72LL5_THET2, S…	522	384	2095	0.940643	1	0.999999	100
GOTERM_MF_FAT	GO:0046914~transition metal ion binding	58	7.06456	0.895582	LYSK_THET2, Q72IG9_THET2, LEU3_THET2, FPG_THET2, Q72JG9_THET2, HISX_THET2, Q72J83_THET2, NPD_THET2, DEF_THET2, HSLO_THET2, Q72H24_THET2, Q72JI3_THET2, Q72K12_THET2, TGT_THET2, SYI_THET2, ILVD_THET2, DDL_THET2, HEMH_THET2, Q72GD4_THET2, Q72HC5_THET2, Q72K10_THET2, DNAJ_THET2, LEUC_THET2, Q746J6_THET2, Q72HI6_THET2, Q72GR2_THET2, Q72HY6_THET2, Q72IU7_THET2, Q72KW6_THET2, SYT_THET2, Q72IK4_THET2, Q7…	522	260	2095	0.895299	1	1	100
Annotation Cluster 29	Enrichment Score: 0.4820824835748317
Category	Term	Count	%	PValue	Genes	List Total	Pop Hits	Pop Total	Fold Enrichment	Bonferroni	Benjamini	FDR
GOTERM_MF_FAT	GO:0031406~carboxylic acid binding	14	1.70524	0.125502	Q72KI3_THET2, Q72LQ4_THET2, GCSH_THET2, Q72GZ6_THET2, ACP_THET2, Q72KV4_THET2, Q72JQ5_THET2, Q72JL3_THET2, Q72K32_THET2, AK_THET2, Q72LF6_THET2, Q72HX7_THET2, Q72JF3_THET2, Q72JL4_THET2, Q72GU4_THET2	522	38	2095	1.47862	1	0.983152	86.2575
INTERPRO	IPR002912:Amino acid-binding ACT	5	0.609013	0.33491	Q72KI3_THET2, Q72KV4_THET2, Q72K32_THET2, AK_THET2, Q72LF6_THET2, Q72HX7_THET2	733	14	3493	1.70191	1	1	99.8757
GOTERM_MF_FAT	GO:0043176~amine binding	6	0.730816	0.529719	Q72KI3_THET2, ACP_THET2, Q72KV4_THET2, Q72K32_THET2, AK_THET2, Q72LF6_THET2, Q72HX7_THET2	522	19	2095	1.26739	1	0.99993	99.9986
GOTERM_MF_FAT	GO:0016597~amino acid binding	6	0.730816	0.529719	Q72KI3_THET2, ACP_THET2, Q72KV4_THET2, Q72K32_THET2, AK_THET2, Q72LF6_THET2, Q72HX7_THET2	522	19	2095	1.26739	1	0.99993	99.9986
Annotation Cluster 30	Enrichment Score: 0.46900041107010404
Category	Term	Count	%	PValue	Genes	List Total	Pop Hits	Pop Total	Fold Enrichment	Bonferroni	Benjamini	FDR
SP_PIR_KEYWORDS	glycolysis	6	0.730816	0.0867597	ENO_THET2, LDH_THET2, TPIS_THET2, Q72H84_THET2, PGK_THET2, APGM_THET2	821	13	4254	2.39146	1	0.455217	67.0954
GOTERM_BP_FAT	GO:0006096~glycolysis	8	0.974421	0.218474	MDH_THET2, ENO_THET2, LDH_THET2, TPIS_THET2, Q72H84_THET2, PGK_THET2, APGM_THET2, Q72GZ7_THET2	447	20	1772	1.58568	1	0.998971	97.3456
GOTERM_BP_FAT	GO:0044275~cellular carbohydrate catabolic process	10	1.21803	0.293677	MDH_THET2, ENO_THET2, LDH_THET2, TPIS_THET2, GPDA_THET2, Q72H84_THET2, PGK_THET2, APGM_THET2, Q72GZ7_THET2, Q72GU9_THET2	447	29	1772	1.36697	1	0.999308	99.4015
GOTERM_BP_FAT	GO:0046164~alcohol catabolic process	10	1.21803	0.293677	MDH_THET2, ENO_THET2, LDH_THET2, TPIS_THET2, GPDA_THET2, Q72H84_THET2, PGK_THET2, APGM_THET2, Q72GZ7_THET2, Q72GU9_THET2	447	29	1772	1.36697	1	0.999308	99.4015
GOTERM_BP_FAT	GO:0016052~carbohydrate catabolic process	13	1.58343	0.325361	ENO_THET2, MDH_THET2, LDH_THET2, TPIS_THET2, GPDA_THET2, Q72H84_THET2, PGK_THET2, Q72KA2_THET2, Q72IX5_THET2, APGM_THET2, Q72GZ7_THET2, Q72GU9_THET2, Q72H29_THET2	447	41	1772	1.25694	1	0.999413	99.6954
GOTERM_BP_FAT	GO:0046365~monosaccharide catabolic process	9	1.09622	0.364462	MDH_THET2, ENO_THET2, LDH_THET2, TPIS_THET2, Q72H84_THET2, PGK_THET2, APGM_THET2, Q72GZ7_THET2, Q72GU9_THET2	447	27	1772	1.3214	1	0.999079	99.8735
GOTERM_BP_FAT	GO:0006007~glucose catabolic process	9	1.09622	0.364462	MDH_THET2, ENO_THET2, LDH_THET2, TPIS_THET2, Q72H84_THET2, PGK_THET2, APGM_THET2, Q72GZ7_THET2, Q72GU9_THET2	447	27	1772	1.3214	1	0.999079	99.8735
GOTERM_BP_FAT	GO:0019320~hexose catabolic process	9	1.09622	0.364462	MDH_THET2, ENO_THET2, LDH_THET2, TPIS_THET2, Q72H84_THET2, PGK_THET2, APGM_THET2, Q72GZ7_THET2, Q72GU9_THET2	447	27	1772	1.3214	1	0.999079	99.8735
GOTERM_BP_FAT	GO:0019318~hexose metabolic process	12	1.46163	0.603071	MDH_THET2, ENO_THET2, LDH_THET2, TPIS_THET2, Q72KV4_THET2, Q72H84_THET2, PGK_THET2, Q72K98_THET2, APGM_THET2, Q72GZ7_THET2, Q72GU9_THET2, Q72L37_THET2	447	45	1772	1.05712	1	0.999563	99.9999
GOTERM_BP_FAT	GO:0006006~glucose metabolic process	11	1.33983	0.606775	MDH_THET2, ENO_THET2, LDH_THET2, TPIS_THET2, Q72KV4_THET2, Q72H84_THET2, PGK_THET2, Q72K98_THET2, APGM_THET2, Q72GZ7_THET2, Q72GU9_THET2	447	41	1772	1.06357	1	0.999549	99.9999
GOTERM_BP_FAT	GO:0005996~monosaccharide metabolic process	14	1.70524	0.7359	LDH_THET2, MDH_THET2, TPIS_THET2, Q72KV4_THET2, Q72H84_THET2, ISPH_THET2, PGK_THET2, APGM_THET2, ENO_THET2, Q72K98_THET2, MURG_THET2, Q72GU9_THET2, Q72GZ7_THET2, Q72L37_THET2	447	58	1772	0.956877	1	0.999844	100
Annotation Cluster 31	Enrichment Score: 0.4554123956619513
Category	Term	Count	%	PValue	Genes	List Total	Pop Hits	Pop Total	Fold Enrichment	Bonferroni	Benjamini	FDR
KEGG_PATHWAY	tth00520:Amino sugar and nucleotide sugar metabolism	9	1.09622	0.164035	GLMM_THET2, GLMS_THET2, Q72J01_THET2, NPD_THET2, Q72H65_THET2, Q72H07_THET2, Q72HU6_THET2, Q72K80_THET2, Q72L37_THET2	347	20	1244	1.61326	1	0.523548	87.2129
GOTERM_MF_FAT	GO:0016868~intramolecular transferase activity, phosphotransferases	6	0.730816	0.202138	GLMM_THET2, Q72H36_THET2, Q72H65_THET2, Q72H77_THET2, APGM_THET2, Q72K80_THET2	522	13	2095	1.85234	1	0.995917	96.4633
INTERPRO	IPR005846:Alpha-D-phosphohexomutase, alpha/beta/alpha domain III	3	0.365408	0.368145	GLMM_THET2, Q72H65_THET2, Q72K80_THET2	733	6	3493	2.38267	1	1	99.9464
INTERPRO	IPR005843:Alpha-D-phosphohexomutase, C-terminal	3	0.365408	0.368145	GLMM_THET2, Q72H65_THET2, Q72K80_THET2	733	6	3493	2.38267	1	1	99.9464
INTERPRO	IPR016055:Alpha-D-phosphohexomutase, alpha/beta/alpha I, II and III	3	0.365408	0.524602	GLMM_THET2, Q72H65_THET2, Q72K80_THET2	733	8	3493	1.78701	1	1	99.9995
INTERPRO	IPR005845:Alpha-D-phosphohexomutase, alpha/beta/alpha domain II	3	0.365408	0.524602	GLMM_THET2, Q72H65_THET2, Q72K80_THET2	733	8	3493	1.78701	1	1	99.9995
INTERPRO	IPR005844:Alpha-D-phosphohexomutase, alpha/beta/alpha domain I	3	0.365408	0.524602	GLMM_THET2, Q72H65_THET2, Q72K80_THET2	733	8	3493	1.78701	1	1	99.9995
Annotation Cluster 32	Enrichment Score: 0.45008069555934993
Category	Term	Count	%	PValue	Genes	List Total	Pop Hits	Pop Total	Fold Enrichment	Bonferroni	Benjamini	FDR
KEGG_PATHWAY	tth00340:Histidine metabolism	9	1.09622	0.164035	HISZ_THET2, Q72GU8_THET2, HISX_THET2, Q72K88_THET2, Q72LK7_THET2, Q72LJ9_THET2, Q72LF1_THET2, Q72KD3_THET2, HIS4_THET2	347	20	1244	1.61326	1	0.523548	87.2129
KEGG_PATHWAY	tth00626:Naphthalene and anthracene degradation	4	0.487211	0.392465	Q72GU8_THET2, Q72K88_THET2, Q72LK7_THET2, Q72LF1_THET2	347	8	1244	1.79251	1	0.775759	99.6722
KEGG_PATHWAY	tth00350:Tyrosine metabolism	6	0.730816	0.693458	Q72GU8_THET2, Q72K88_THET2, Q72LJ9_THET2, Q72LF1_THET2, Q72JD0_THET2, Q72G93_THET2	347	20	1244	1.0755	1	0.941443	99.9999
Annotation Cluster 33	Enrichment Score: 0.44120296419722593
Category	Term	Count	%	PValue	Genes	List Total	Pop Hits	Pop Total	Fold Enrichment	Bonferroni	Benjamini	FDR
GOTERM_MF_FAT	GO:0015300~solute:solute antiporter activity	6	0.730816	0.254084	Q72GX6_THET2, Q72JG2_THET2, Q72K84_THET2, Q72JZ3_THET2, Q72G87_THET2, Q72G86_THET2, Q72KK9_THET2, Q72IM4_THET2	522	14	2095	1.72003	1	0.996845	98.6941
GOTERM_MF_FAT	GO:0015299~solute:hydrogen antiporter activity	6	0.730816	0.254084	Q72GX6_THET2, Q72JG2_THET2, Q72K84_THET2, Q72JZ3_THET2, Q72G87_THET2, Q72G86_THET2, Q72KK9_THET2, Q72IM4_THET2	522	14	2095	1.72003	1	0.996845	98.6941
GOTERM_MF_FAT	GO:0015298~solute:cation antiporter activity	6	0.730816	0.254084	Q72GX6_THET2, Q72JG2_THET2, Q72K84_THET2, Q72JZ3_THET2, Q72G87_THET2, Q72G86_THET2, Q72KK9_THET2, Q72IM4_THET2	522	14	2095	1.72003	1	0.996845	98.6941
GOTERM_MF_FAT	GO:0015297~antiporter activity	6	0.730816	0.254084	Q72GX6_THET2, Q72JG2_THET2, Q72K84_THET2, Q72JZ3_THET2, Q72G87_THET2, Q72G86_THET2, Q72KK9_THET2, Q72IM4_THET2	522	14	2095	1.72003	1	0.996845	98.6941
GOTERM_BP_FAT	GO:0046677~response to antibiotic	4	0.487211	0.325511	Q72GX6_THET2, UPPP_THET2, Q72JZ3_THET2, Q72KK9_THET2	447	8	1772	1.9821	1	0.999262	99.6964
GOTERM_MF_FAT	GO:0042895~antibiotic transporter activity	3	0.365408	0.364416	Q72GX6_THET2, Q72JZ3_THET2, Q72KK9_THET2	522	5	2095	2.40805	1	0.999532	99.8778
GOTERM_MF_FAT	GO:0008493~tetracycline transporter activity	3	0.365408	0.364416	Q72GX6_THET2, Q72JZ3_THET2, Q72KK9_THET2	522	5	2095	2.40805	1	0.999532	99.8778
GOTERM_MF_FAT	GO:0015307~drug:hydrogen antiporter activity	3	0.365408	0.364416	Q72GX6_THET2, Q72JZ3_THET2, Q72KK9_THET2	522	5	2095	2.40805	1	0.999532	99.8778
GOTERM_MF_FAT	GO:0015520~tetracycline:hydrogen antiporter activity	3	0.365408	0.364416	Q72GX6_THET2, Q72JZ3_THET2, Q72KK9_THET2	522	5	2095	2.40805	1	0.999532	99.8778
GOTERM_MF_FAT	GO:0015238~drug transporter activity	3	0.365408	0.364416	Q72GX6_THET2, Q72JZ3_THET2, Q72KK9_THET2	522	5	2095	2.40805	1	0.999532	99.8778
GOTERM_BP_FAT	GO:0015893~drug transport	3	0.365408	0.370763	Q72GX6_THET2, Q72JZ3_THET2, Q72KK9_THET2	447	5	1772	2.37852	1	0.999051	99.8908
GOTERM_BP_FAT	GO:0015904~tetracycline transport	3	0.365408	0.370763	Q72GX6_THET2, Q72JZ3_THET2, Q72KK9_THET2	447	5	1772	2.37852	1	0.999051	99.8908
GOTERM_BP_FAT	GO:0015850~organic alcohol transport	3	0.365408	0.370763	Q72GX6_THET2, Q72JZ3_THET2, Q72KK9_THET2	447	5	1772	2.37852	1	0.999051	99.8908
GOTERM_BP_FAT	GO:0042891~antibiotic transport	3	0.365408	0.370763	Q72GX6_THET2, Q72JZ3_THET2, Q72KK9_THET2	447	5	1772	2.37852	1	0.999051	99.8908
GOTERM_BP_FAT	GO:0042493~response to drug	3	0.365408	0.370763	Q72GX6_THET2, Q72JZ3_THET2, Q72KK9_THET2	447	5	1772	2.37852	1	0.999051	99.8908
INTERPRO	IPR006153:Cation/H+ exchanger	3	0.365408	0.592424	Q72JG2_THET2, Q72K84_THET2, Q72G87_THET2, Q72G86_THET2, Q72IM4_THET2	733	9	3493	1.58845	1	1	100
INTERPRO	IPR011701:Major facilitator superfamily MFS-1	7	0.852619	0.872919	Q72GX6_THET2, Q72JZ3_THET2, Q72KK9_THET2, Q72KC2_THET2, Q72GR5_THET2, Q72GQ5_THET2, Q72H63_THET2	733	40	3493	0.833936	1	1	100
Annotation Cluster 34	Enrichment Score: 0.4408242005764268
Category	Term	Count	%	PValue	Genes	List Total	Pop Hits	Pop Total	Fold Enrichment	Bonferroni	Benjamini	FDR
GOTERM_BP_FAT	GO:0006119~oxidative phosphorylation	13	1.58343	0.0396645	Q72H24_THET2, VATB_THET2, VATA_THET2, Q72GE1_THET2, NUOK_THET2, VATE_THET2, Q72J68_THET2, VATC_THET2, Q72GE0_THET2, VATD_THET2, Q72GD4_THET2, Q72GD9_THET2, Q72J67_THET2	447	29	1772	1.77706	1	0.991291	44.8888
GOTERM_BP_FAT	GO:0009150~purine ribonucleotide metabolic process	17	2.07065	0.125824	Q72H76_THET2, VATB_THET2, VATA_THET2, Q72K86_THET2, PURL_THET2, Q72J68_THET2, VATE_THET2, Q72LJ5_THET2, Q72LL5_THET2, PURQ_THET2, VATC_THET2, VATD_THET2, NDK_THET2, GUAA_THET2, Q72KF9_THET2, Q72J67_THET2, Q72LC2_THET2	447	48	1772	1.40399	1	0.999226	86.1883
GOTERM_BP_FAT	GO:0009259~ribonucleotide metabolic process	18	2.19245	0.135086	Q72H76_THET2, VATB_THET2, VATA_THET2, Q72IE8_THET2, Q72K86_THET2, PURL_THET2, Q72J68_THET2, VATE_THET2, Q72LJ5_THET2, Q72LL5_THET2, PURQ_THET2, VATC_THET2, VATD_THET2, NDK_THET2, GUAA_THET2, Q72KF9_THET2, Q72J67_THET2, Q72LC2_THET2	447	52	1772	1.37223	1	0.999164	88.1929
GOTERM_BP_FAT	GO:0009152~purine ribonucleotide biosynthetic process	16	1.94884	0.157031	Q72H76_THET2, VATB_THET2, VATA_THET2, Q72K86_THET2, PURL_THET2, Q72J68_THET2, VATE_THET2, Q72LJ5_THET2, PURQ_THET2, VATC_THET2, VATD_THET2, NDK_THET2, GUAA_THET2, Q72KF9_THET2, Q72J67_THET2, Q72LC2_THET2	447	46	1772	1.37885	1	0.998736	91.9122
GOTERM_BP_FAT	GO:0009260~ribonucleotide biosynthetic process	17	2.07065	0.166937	Q72H76_THET2, VATB_THET2, VATA_THET2, Q72IE8_THET2, Q72K86_THET2, PURL_THET2, Q72J68_THET2, VATE_THET2, Q72LJ5_THET2, PURQ_THET2, VATC_THET2, VATD_THET2, NDK_THET2, GUAA_THET2, Q72KF9_THET2, Q72J67_THET2, Q72LC2_THET2	447	50	1772	1.34783	1	0.997384	93.2039
SP_PIR_KEYWORDS	atp synthesis	5	0.609013	0.186284	VATB_THET2, VATD_THET2, VATA_THET2, VATE_THET2, VATC_THET2	821	12	4254	2.15895	1	0.620701	91.9925
GOTERM_BP_FAT	GO:0006163~purine nucleotide metabolic process	18	2.19245	0.198765	Q72H76_THET2, VATB_THET2, VATA_THET2, Q72K86_THET2, PURL_THET2, Q72J68_THET2, VATE_THET2, Q72LJ5_THET2, Q72LL5_THET2, PURQ_THET2, VATC_THET2, VATD_THET2, NDK_THET2, KGUA_THET2, GUAA_THET2, Q72KF9_THET2, Q72J67_THET2, Q72LC2_THET2	447	55	1772	1.29738	1	0.998486	96.17
GOTERM_BP_FAT	GO:0015985~energy coupled proton transport, down electrochemical gradient	7	0.852619	0.239048	VATB_THET2, VATD_THET2, VATA_THET2, VATE_THET2, Q72J68_THET2, Q72J67_THET2, VATC_THET2	447	17	1772	1.63232	1	0.999309	98.2078
GOTERM_BP_FAT	GO:0015986~ATP synthesis coupled proton transport	7	0.852619	0.239048	VATB_THET2, VATD_THET2, VATA_THET2, VATE_THET2, Q72J68_THET2, Q72J67_THET2, VATC_THET2	447	17	1772	1.63232	1	0.999309	98.2078
GOTERM_CC_FAT	GO:0016469~proton-transporting two-sector ATPase complex	7	0.852619	0.239352	VATB_THET2, VATD_THET2, VATA_THET2, VATE_THET2, Q72J68_THET2, Q72J67_THET2, VATC_THET2	127	17	499	1.61788	1	0.958147	93.4256
GOTERM_BP_FAT	GO:0034220~ion transmembrane transport	9	1.09622	0.279148	VATB_THET2, VATD_THET2, VATA_THET2, VATE_THET2, Q72J68_THET2, Q72KN7_THET2, Q72KV1_THET2, Q72J67_THET2, VATC_THET2	447	25	1772	1.42711	1	0.999535	99.1923
GOTERM_BP_FAT	GO:0009144~purine nucleoside triphosphate metabolic process	10	1.21803	0.293677	VATB_THET2, NDK_THET2, VATD_THET2, VATA_THET2, VATE_THET2, Q72J68_THET2, Q72KF9_THET2, Q72J67_THET2, Q72LL5_THET2, VATC_THET2	447	29	1772	1.36697	1	0.999308	99.4015
GOTERM_BP_FAT	GO:0009205~purine ribonucleoside triphosphate metabolic process	10	1.21803	0.293677	VATB_THET2, NDK_THET2, VATD_THET2, VATA_THET2, VATE_THET2, Q72J68_THET2, Q72KF9_THET2, Q72J67_THET2, Q72LL5_THET2, VATC_THET2	447	29	1772	1.36697	1	0.999308	99.4015
GOTERM_BP_FAT	GO:0009199~ribonucleoside triphosphate metabolic process	10	1.21803	0.293677	VATB_THET2, NDK_THET2, VATD_THET2, VATA_THET2, VATE_THET2, Q72J68_THET2, Q72KF9_THET2, Q72J67_THET2, Q72LL5_THET2, VATC_THET2	447	29	1772	1.36697	1	0.999308	99.4015
GOTERM_BP_FAT	GO:0006164~purine nucleotide biosynthetic process	16	1.94884	0.316513	Q72H76_THET2, VATB_THET2, VATA_THET2, Q72K86_THET2, PURL_THET2, Q72J68_THET2, VATE_THET2, Q72LJ5_THET2, PURQ_THET2, VATC_THET2, VATD_THET2, NDK_THET2, GUAA_THET2, Q72KF9_THET2, Q72J67_THET2, Q72LC2_THET2	447	52	1772	1.21976	1	0.999409	99.631
SP_PIR_KEYWORDS	Hydrogen ion transport	5	0.609013	0.324685	VATB_THET2, VATD_THET2, VATA_THET2, VATE_THET2, VATC_THET2	821	15	4254	1.72716	1	0.788273	99.1837
GOTERM_BP_FAT	GO:0055085~transmembrane transport	11	1.33983	0.343553	SECA_THET2, VATB_THET2, VATD_THET2, VATA_THET2, Q72KF0_THET2, VATE_THET2, Q72J68_THET2, Q72KN7_THET2, Q72KV1_THET2, Q72J67_THET2, VATC_THET2	447	34	1772	1.28254	1	0.999293	99.7963
GOTERM_MF_FAT	GO:0046933~hydrogen ion transporting ATP synthase activity, rotational mechanism	5	0.609013	0.346963	VATB_THET2, VATD_THET2, VATA_THET2, VATE_THET2, VATC_THET2	522	12	2095	1.67225	1	0.999516	99.8175
GOTERM_MF_FAT	GO:0015077~monovalent inorganic cation transmembrane transporter activity	9	1.09622	0.350691	Q72H24_THET2, VATB_THET2, VATD_THET2, VATA_THET2, VATE_THET2, Q72J68_THET2, Q72HC7_THET2, Q72J67_THET2, VATC_THET2	522	27	2095	1.3378	1	0.999455	99.8324
GOTERM_MF_FAT	GO:0015078~hydrogen ion transmembrane transporter activity	9	1.09622	0.350691	Q72H24_THET2, VATB_THET2, VATD_THET2, VATA_THET2, VATE_THET2, Q72J68_THET2, Q72HC7_THET2, Q72J67_THET2, VATC_THET2	522	27	2095	1.3378	1	0.999455	99.8324
GOTERM_BP_FAT	GO:0006812~cation transport	23	2.80146	0.353174	Q72G86_THET2, Q72J68_THET2, Q72KN7_THET2, Q72JG2_THET2, Q72KF9_THET2, Q72JS3_THET2, VATB_THET2, VATA_THET2, Q72G87_THET2, VATE_THET2, Q72HB7_THET2, Q72JG3_THET2, Q72L34_THET2, Q746P5_THET2, Q72HZ0_THET2, Q72KV1_THET2, Q72IM4_THET2, Q72HZ3_THET2, VATC_THET2, Q72K84_THET2, VATD_THET2, Q72JU0_THET2, Q72IL9_THET2, Q72J67_THET2, Q72HX6_THET2	447	80	1772	1.13971	1	0.999321	99.8361
GOTERM_BP_FAT	GO:0042777~plasma membrane ATP synthesis coupled proton transport	5	0.609013	0.356267	VATB_THET2, VATD_THET2, VATA_THET2, VATE_THET2, VATC_THET2	447	12	1772	1.65175	1	0.999231	99.8473
GOTERM_BP_FAT	GO:0009145~purine nucleoside triphosphate biosynthetic process	9	1.09622	0.364462	VATB_THET2, NDK_THET2, VATD_THET2, VATA_THET2, VATE_THET2, Q72J68_THET2, Q72KF9_THET2, Q72J67_THET2, VATC_THET2	447	27	1772	1.3214	1	0.999079	99.8735
GOTERM_BP_FAT	GO:0009201~ribonucleoside triphosphate biosynthetic process	9	1.09622	0.364462	VATB_THET2, NDK_THET2, VATD_THET2, VATA_THET2, VATE_THET2, Q72J68_THET2, Q72KF9_THET2, Q72J67_THET2, VATC_THET2	447	27	1772	1.3214	1	0.999079	99.8735
GOTERM_BP_FAT	GO:0009206~purine ribonucleoside triphosphate biosynthetic process	9	1.09622	0.364462	VATB_THET2, NDK_THET2, VATD_THET2, VATA_THET2, VATE_THET2, Q72J68_THET2, Q72KF9_THET2, Q72J67_THET2, VATC_THET2	447	27	1772	1.3214	1	0.999079	99.8735
GOTERM_BP_FAT	GO:0015992~proton transport	7	0.852619	0.389433	VATB_THET2, VATD_THET2, VATA_THET2, VATE_THET2, Q72J68_THET2, Q72J67_THET2, VATC_THET2	447	20	1772	1.38747	1	0.998976	99.9299
GOTERM_BP_FAT	GO:0006818~hydrogen transport	7	0.852619	0.389433	VATB_THET2, VATD_THET2, VATA_THET2, VATE_THET2, Q72J68_THET2, Q72J67_THET2, VATC_THET2	447	20	1772	1.38747	1	0.998976	99.9299
GOTERM_BP_FAT	GO:0009141~nucleoside triphosphate metabolic process	10	1.21803	0.414928	VATB_THET2, NDK_THET2, VATD_THET2, VATA_THET2, VATE_THET2, Q72J68_THET2, Q72KF9_THET2, Q72J67_THET2, Q72LL5_THET2, VATC_THET2	447	32	1772	1.23881	1	0.998748	99.9626
GOTERM_BP_FAT	GO:0015672~monovalent inorganic cation transport	11	1.33983	0.420654	VATB_THET2, VATA_THET2, Q72G87_THET2, Q72G86_THET2, Q72J68_THET2, VATE_THET2, Q72L34_THET2, VATC_THET2, Q72HZ3_THET2, VATD_THET2, Q72JG2_THET2, Q72IL9_THET2, Q72J67_THET2	447	36	1772	1.21129	1	0.998724	99.9676
SP_PIR_KEYWORDS	ion transport	6	0.730816	0.422681	Q72JG2_THET2, VATB_THET2, VATD_THET2, VATA_THET2, Q72G87_THET2, Q72G86_THET2, VATE_THET2, VATC_THET2	821	22	4254	1.41313	1	0.840903	99.8804
GOTERM_MF_FAT	GO:0015405~P-P-bond-hydrolysis-driven transmembrane transporter activity	11	1.33983	0.442238	Q72I24_THET2, Q72J05_THET2, VATB_THET2, VATD_THET2, VATA_THET2, CBID_THET2, Q72KF0_THET2, Q72J04_THET2, VATE_THET2, Q72KF9_THET2, Q72KH0_THET2	522	37	2095	1.19318	1	0.999862	99.9823
GOTERM_MF_FAT	GO:0015399~primary active transmembrane transporter activity	11	1.33983	0.442238	Q72I24_THET2, Q72J05_THET2, VATB_THET2, VATD_THET2, VATA_THET2, CBID_THET2, Q72KF0_THET2, Q72J04_THET2, VATE_THET2, Q72KF9_THET2, Q72KH0_THET2	522	37	2095	1.19318	1	0.999862	99.9823
GOTERM_BP_FAT	GO:0046034~ATP metabolic process	8	0.974421	0.446795	VATB_THET2, VATD_THET2, VATA_THET2, VATE_THET2, Q72J68_THET2, Q72KF9_THET2, Q72J67_THET2, VATC_THET2	447	25	1772	1.26855	1	0.998889	99.9836
GOTERM_BP_FAT	GO:0006754~ATP biosynthetic process	8	0.974421	0.446795	VATB_THET2, VATD_THET2, VATA_THET2, VATE_THET2, Q72J68_THET2, Q72KF9_THET2, Q72J67_THET2, VATC_THET2	447	25	1772	1.26855	1	0.998889	99.9836
GOTERM_MF_FAT	GO:0019829~cation-transporting ATPase activity	4	0.487211	0.470633	VATB_THET2, VATD_THET2, VATA_THET2, VATE_THET2	522	10	2095	1.60536	1	0.999878	99.9918
GOTERM_MF_FAT	GO:0046961~proton-transporting ATPase activity, rotational mechanism	4	0.487211	0.470633	VATB_THET2, VATD_THET2, VATA_THET2, VATE_THET2	522	10	2095	1.60536	1	0.999878	99.9918
GOTERM_CC_FAT	GO:0033177~proton-transporting two-sector ATPase complex, proton-transporting domain	3	0.365408	0.472624	Q72J68_THET2, Q72J67_THET2, VATC_THET2	127	6	499	1.96457	1	0.983811	99.8281
GOTERM_BP_FAT	GO:0009142~nucleoside triphosphate biosynthetic process	9	1.09622	0.494763	VATB_THET2, NDK_THET2, VATD_THET2, VATA_THET2, VATE_THET2, Q72J68_THET2, Q72KF9_THET2, Q72J67_THET2, VATC_THET2	447	30	1772	1.18926	1	0.998865	99.9957
GOTERM_CC_FAT	GO:0033178~proton-transporting two-sector ATPase complex, catalytic domain	4	0.487211	0.55417	VATB_THET2, VATD_THET2, VATA_THET2, VATE_THET2	127	11	499	1.42878	1	0.979848	99.9677
GOTERM_BP_FAT	GO:0009165~nucleotide biosynthetic process	23	2.80146	0.557605	Q72H76_THET2, PYRE_THET2, KAD_THET2, VATB_THET2, NADD_THET2, VATA_THET2, CARB_THET2, Q72IE8_THET2, Q72K86_THET2, PURL_THET2, Q72J68_THET2, VATE_THET2, Q72LJ5_THET2, PURQ_THET2, VATC_THET2, VATD_THET2, NDK_THET2, PYRF_THET2, CARA_THET2, GUAA_THET2, Q72KF9_THET2, Q72J67_THET2, Q72LC2_THET2	447	88	1772	1.0361	1	0.999359	99.9994
GOTERM_MF_FAT	GO:0043492~ATPase activity, coupled to movement of substances	9	1.09622	0.561632	Q72J05_THET2, VATB_THET2, VATD_THET2, VATA_THET2, CBID_THET2, Q72J04_THET2, VATE_THET2, Q72KF9_THET2, Q72KH0_THET2	522	32	2095	1.12877	1	0.999947	99.9995
GOTERM_MF_FAT	GO:0042626~ATPase activity, coupled to transmembrane movement of substances	9	1.09622	0.561632	Q72J05_THET2, VATB_THET2, VATD_THET2, VATA_THET2, CBID_THET2, Q72J04_THET2, VATE_THET2, Q72KF9_THET2, Q72KH0_THET2	522	32	2095	1.12877	1	0.999947	99.9995
GOTERM_MF_FAT	GO:0022890~inorganic cation transmembrane transporter activity	11	1.33983	0.589163	Q72H24_THET2, VATB_THET2, VATD_THET2, VATA_THET2, VATE_THET2, Q72J68_THET2, Q72KN7_THET2, Q72KV1_THET2, Q72HC7_THET2, Q72J67_THET2, VATC_THET2	522	41	2095	1.07677	1	0.999964	99.9998
GOTERM_MF_FAT	GO:0042625~ATPase activity, coupled to transmembrane movement of ions	6	0.730816	0.672562	VATB_THET2, VATD_THET2, VATA_THET2, VATE_THET2, Q72KF9_THET2, Q72KH0_THET2	522	22	2095	1.09457	1	0.999986	100
GOTERM_BP_FAT	GO:0034654~nucleobase, nucleoside, nucleotide and nucleic acid biosynthetic process	25	3.04507	0.690551	Q72H76_THET2, PYRE_THET2, KAD_THET2, VATB_THET2, NADD_THET2, VATA_THET2, CARB_THET2, Q72IE8_THET2, TGT_THET2, Q72K86_THET2, PURL_THET2, Q72J68_THET2, VATE_THET2, Q72LJ5_THET2, Q72IH6_THET2, PURQ_THET2, VATC_THET2, NDK_THET2, VATD_THET2, PYRF_THET2, CARA_THET2, GUAA_THET2, Q72KF9_THET2, Q72J67_THET2, Q72LC2_THET2	447	102	1772	0.971619	1	0.999814	100
GOTERM_BP_FAT	GO:0034404~nucleobase, nucleoside and nucleotide biosynthetic process	25	3.04507	0.690551	Q72H76_THET2, PYRE_THET2, KAD_THET2, VATB_THET2, NADD_THET2, VATA_THET2, CARB_THET2, Q72IE8_THET2, TGT_THET2, Q72K86_THET2, PURL_THET2, Q72J68_THET2, VATE_THET2, Q72LJ5_THET2, Q72IH6_THET2, PURQ_THET2, VATC_THET2, NDK_THET2, VATD_THET2, PYRF_THET2, CARA_THET2, GUAA_THET2, Q72KF9_THET2, Q72J67_THET2, Q72LC2_THET2	447	102	1772	0.971619	1	0.999814	100
GOTERM_MF_FAT	GO:0042623~ATPase activity, coupled	13	1.58343	0.725274	Q72G97_THET2, VATB_THET2, VATD_THET2, Q72J05_THET2, VATA_THET2, CBID_THET2, Q72IS0_THET2, Q72J04_THET2, VATE_THET2, RECA_THET2, Q72KF9_THET2, Q72KB4_THET2, Q72KH0_THET2	522	54	2095	0.966191	1	0.999991	100
GOTERM_BP_FAT	GO:0006811~ion transport	25	3.04507	0.782879	Q72G86_THET2, Q72J68_THET2, Q72KN7_THET2, Q72KH0_THET2, Q72JG2_THET2, Q72KF9_THET2, Q72JS3_THET2, Q72KH1_THET2, VATB_THET2, VATA_THET2, Q72G87_THET2, VATE_THET2, Q72JG3_THET2, Q72HB7_THET2, Q72L34_THET2, Q746P5_THET2, Q72KV1_THET2, Q72HZ0_THET2, Q72IM4_THET2, VATC_THET2, Q72HZ3_THET2, Q72K84_THET2, VATD_THET2, Q72JU0_THET2, Q72IL9_THET2, Q72J67_THET2, Q72HX6_THET2	447	107	1772	0.926216	1	0.999902	100
GOTERM_BP_FAT	GO:0030001~metal ion transport	11	1.33983	0.783209	Q72G87_THET2, Q72G86_THET2, Q72HB7_THET2, Q72L34_THET2, Q72KN7_THET2, Q746P5_THET2, Q72HZ0_THET2, Q72KV1_THET2, Q72HZ3_THET2, Q72JG2_THET2, Q72IL9_THET2, Q72KF9_THET2, Q72HX6_THET2	447	47	1772	0.927793	1	0.999893	100
GOTERM_MF_FAT	GO:0016820~hydrolase activity, acting on acid anhydrides, catalyzing transmembrane movement of substances	10	1.21803	0.845117	Q72J05_THET2, VATB_THET2, VATD_THET2, VATA_THET2, CBID_THET2, Q72J04_THET2, VATE_THET2, Q72KF9_THET2, Q72I66_THET2, Q72KH0_THET2	522	46	2095	0.87248	1	0.999999	100
Annotation Cluster 35	Enrichment Score: 0.4288670771998353
Category	Term	Count	%	PValue	Genes	List Total	Pop Hits	Pop Total	Fold Enrichment	Bonferroni	Benjamini	FDR
INTERPRO	IPR011761:ATP-grasp fold	5	0.609013	0.282311	Q72HE6_THET2, CARB_THET2, Q72JL4_THET2, DDL_THET2, Q72LC2_THET2	733	13	3493	1.83283	1	1	99.5669
INTERPRO	IPR013817:Pre-ATP-grasp fold	4	0.487211	0.287225	CARB_THET2, Q72JL4_THET2, DDL_THET2, Q72LC2_THET2	733	9	3493	2.11793	1	1	99.613
INTERPRO	IPR013816:ATP-grasp fold, subdomain 2	4	0.487211	0.637452	CARB_THET2, Q72JL4_THET2, DDL_THET2, Q72LC2_THET2	733	15	3493	1.27076	1	1	100
Annotation Cluster 36	Enrichment Score: 0.42873369931039185
Category	Term	Count	%	PValue	Genes	List Total	Pop Hits	Pop Total	Fold Enrichment	Bonferroni	Benjamini	FDR
KEGG_PATHWAY	tth00061:Fatty acid biosynthesis	8	0.974421	0.0251353	ACCD_THET2, Q72JL3_THET2, Q72KU7_THET2, Q72JL4_THET2, Q72LL1_THET2, Q72LL0_THET2, FABZ_THET2, Q72LL4_THET2	347	12	1244	2.39001	0.952867	0.173805	25.3399
GOTERM_MF_FAT	GO:0004312~fatty-acid synthase activity	5	0.609013	0.346963	Q72GI7_THET2, Q72LL1_THET2, Q72LL0_THET2, Q72L26_THET2, Q72LL4_THET2	522	12	2095	1.67225	1	0.999516	99.8175
GOTERM_MF_FAT	GO:0016885~ligase activity, forming carbon-carbon bonds	4	0.487211	0.395636	ACCD_THET2, Q72JL3_THET2, Q72JI9_THET2, Q72IE0_THET2	522	9	2095	1.78374	1	0.999749	99.942
GOTERM_BP_FAT	GO:0006633~fatty acid biosynthetic process	9	1.09622	0.40813	ACCD_THET2, ACP_THET2, Q72JL3_THET2, Q72JI9_THET2, Q72LL1_THET2, Q72LL0_THET2, FABZ_THET2, Q72L26_THET2, Q72LL4_THET2	447	28	1772	1.27421	1	0.998919	99.9557
GOTERM_BP_FAT	GO:0006631~fatty acid metabolic process	9	1.09622	0.577395	ACCD_THET2, ACP_THET2, Q72JL3_THET2, Q72JI9_THET2, Q72LL1_THET2, Q72LL0_THET2, FABZ_THET2, Q72L26_THET2, Q72LL4_THET2	447	32	1772	1.11493	1	0.999402	99.9997
SP_PIR_KEYWORDS	lipid synthesis	3	0.365408	0.602203	ACCD_THET2, ACP_THET2, FABZ_THET2	821	10	4254	1.55445	1	0.915214	99.9988
GOTERM_MF_FAT	GO:0003989~acetyl-CoA carboxylase activity	3	0.365408	0.630084	ACCD_THET2, Q72JL3_THET2, Q72JI9_THET2	522	8	2095	1.50503	1	0.99998	100
GOTERM_CC_FAT	GO:0009317~acetyl-CoA carboxylase complex	3	0.365408	0.641043	ACCD_THET2, Q72JL3_THET2, Q72JI9_THET2	127	8	499	1.47343	1	0.980967	99.9963
GOTERM_BP_FAT	GO:0008610~lipid biosynthetic process	16	1.94884	0.700219	ACCD_THET2, ACP_THET2, Q72JL3_THET2, ISPH_THET2, Q72JI9_THET2, Q72KZ1_THET2, ISPD_THET2, Q72L26_THET2, Q72LL4_THET2, GPDA_THET2, ISPE_THET2, DXS_THET2, Q72LL1_THET2, Q72LL0_THET2, Q72LG9_THET2, FABZ_THET2	447	65	1772	0.975805	1	0.999818	100
Annotation Cluster 37	Enrichment Score: 0.4245845531525943
Category	Term	Count	%	PValue	Genes	List Total	Pop Hits	Pop Total	Fold Enrichment	Bonferroni	Benjamini	FDR
KEGG_PATHWAY	tth00290:Valine, leucine and isoleucine biosynthesis	11	1.33983	0.0185077	Q72GY8_THET2, LEUC_THET2, Q72JC6_THET2, Q72JC9_THET2, SYI_THET2, Q72GM3_THET2, SYV_THET2, ILVD_THET2, Q72K50_THET2, ILVC_THET2, LEU3_THET2	347	19	1244	2.07553	0.893726	0.158392	19.3012
SP_PIR_KEYWORDS	branched-chain amino acid biosynthesis	6	0.730816	0.180154	LEUC_THET2, Q72JC6_THET2, Q72JC9_THET2, ILVD_THET2, ILVC_THET2, LEU3_THET2	821	16	4254	1.94306	1	0.627501	91.2216
SP_PIR_KEYWORDS	leucine biosynthesis	3	0.365408	0.475362	LEUC_THET2, Q72JC9_THET2, LEU3_THET2	821	8	4254	1.94306	1	0.870061	99.9629
KEGG_PATHWAY	tth00770:Pantothenate and CoA biosynthesis	5	0.609013	0.575969	PANC_THET2, Q72JC6_THET2, Q72ID7_THET2, ILVD_THET2, ILVC_THET2	347	14	1244	1.28036	1	0.898517	99.9947
GOTERM_BP_FAT	GO:0009082~branched chain family amino acid biosynthetic process	6	0.730816	0.724615	LEUC_THET2, Q72JC6_THET2, Q72JC9_THET2, ILVD_THET2, ILVC_THET2, LEU3_THET2	447	23	1772	1.03414	1	0.999847	100
GOTERM_BP_FAT	GO:0009081~branched chain family amino acid metabolic process	7	0.852619	0.744804	LEUC_THET2, Q72JC6_THET2, Q72JC9_THET2, ILVD_THET2, Q72GU9_THET2, ILVC_THET2, LEU3_THET2	447	28	1772	0.991051	1	0.999833	100
GOTERM_BP_FAT	GO:0006551~leucine metabolic process	3	0.365408	0.902354	LEUC_THET2, Q72JC9_THET2, LEU3_THET2	447	14	1772	0.849473	1	0.999983	100
GOTERM_BP_FAT	GO:0009098~leucine biosynthetic process	3	0.365408	0.902354	LEUC_THET2, Q72JC9_THET2, LEU3_THET2	447	14	1772	0.849473	1	0.999983	100
Annotation Cluster 38	Enrichment Score: 0.41059555875841264
Category	Term	Count	%	PValue	Genes	List Total	Pop Hits	Pop Total	Fold Enrichment	Bonferroni	Benjamini	FDR
KEGG_PATHWAY	tth03060:Protein export	8	0.974421	0.0417206	SECA_THET2, Q72I24_THET2, Q72KF0_THET2, Q72G85_THET2, Q72LJ1_THET2, Q72IX8_THET2, Q72JU4_THET2, Q72LN9_THET2	347	13	1244	2.20616	0.993987	0.259788	38.6885
KEGG_PATHWAY	tth03070:Bacterial secretion system	8	0.974421	0.0640398	SECA_THET2, Q72I24_THET2, Q72GK3_THET2, Q72KF0_THET2, Q72LJ1_THET2, Q72GK4_THET2, Q72JU4_THET2, Q72LN9_THET2	347	14	1244	2.04858	0.999644	0.303017	53.2206
GOTERM_BP_FAT	GO:0045184~establishment of protein localization	10	1.21803	0.414928	SECA_THET2, Q72I24_THET2, Q72GK3_THET2, Q72KP0_THET2, Q72KF0_THET2, Q72LJ1_THET2, Q72IW4_THET2, CLPX_THET2, Q72JU4_THET2, TIG_THET2	447	32	1772	1.23881	1	0.998748	99.9626
GOTERM_BP_FAT	GO:0015031~protein transport	10	1.21803	0.414928	SECA_THET2, Q72I24_THET2, Q72GK3_THET2, Q72KP0_THET2, Q72KF0_THET2, Q72LJ1_THET2, Q72IW4_THET2, CLPX_THET2, Q72JU4_THET2, TIG_THET2	447	32	1772	1.23881	1	0.998748	99.9626
GOTERM_BP_FAT	GO:0008104~protein localization	10	1.21803	0.496243	SECA_THET2, Q72I24_THET2, Q72GK3_THET2, Q72KP0_THET2, Q72KF0_THET2, Q72LJ1_THET2, Q72IW4_THET2, CLPX_THET2, Q72JU4_THET2, TIG_THET2	447	34	1772	1.16594	1	0.998765	99.9959
GOTERM_BP_FAT	GO:0006605~protein targeting	3	0.365408	0.55962	SECA_THET2, Q72LJ1_THET2, Q72JU4_THET2	447	7	1772	1.69895	1	0.999312	99.9994
GOTERM_BP_FAT	GO:0006886~intracellular protein transport	4	0.487211	0.673353	SECA_THET2, Q72KF0_THET2, Q72LJ1_THET2, Q72JU4_THET2	447	13	1772	1.21976	1	0.999776	100
GOTERM_BP_FAT	GO:0046907~intracellular transport	4	0.487211	0.673353	SECA_THET2, Q72KF0_THET2, Q72LJ1_THET2, Q72JU4_THET2	447	13	1772	1.21976	1	0.999776	100
GOTERM_BP_FAT	GO:0070727~cellular macromolecule localization	4	0.487211	0.769607	SECA_THET2, Q72KF0_THET2, Q72LJ1_THET2, Q72JU4_THET2	447	15	1772	1.05712	1	0.999883	100
GOTERM_BP_FAT	GO:0034613~cellular protein localization	4	0.487211	0.769607	SECA_THET2, Q72KF0_THET2, Q72LJ1_THET2, Q72JU4_THET2	447	15	1772	1.05712	1	0.999883	100
GOTERM_MF_FAT	GO:0008565~protein transporter activity	4	0.487211	0.887342	Q72I24_THET2, Q72GK3_THET2, Q72KP0_THET2, Q72KF0_THET2	522	19	2095	0.844928	1	1	100
Annotation Cluster 39	Enrichment Score: 0.4076011834041377
Category	Term	Count	%	PValue	Genes	List Total	Pop Hits	Pop Total	Fold Enrichment	Bonferroni	Benjamini	FDR
SP_PIR_KEYWORDS	pyridoxal phosphate	12	1.46163	0.150761	LYSN_THET2, Q72GY8_THET2, Q72LJ9_THET2, Q72L50_THET2, GCSPB_THET2, Q72KD6_THET2, PDXT_THET2, Q72GN5_THET2, Q72I55_THET2, GLYA_THET2, Q72K94_THET2, Q72H54_THET2	821	41	4254	1.51653	1	0.57753	86.4861
INTERPRO	IPR015421:Pyridoxal phosphate-dependent transferase, major region, subdomain 1	13	1.58343	0.172606	LYSN_THET2, Q72LH2_THET2, Q72LJ9_THET2, Q72LA9_THET2, Q72H54_THET2, Q72K94_THET2, Q72I76_THET2, Q72KV7_THET2, Q72L50_THET2, GCSPB_THET2, Q72KD6_THET2, Q72GN5_THET2, GLYA_THET2	733	43	3493	1.44069	1	1	95.5325
SP_PIR_KEYWORDS	Aminotransferase	9	1.09622	0.180622	LYSN_THET2, Q72I76_THET2, GLMS_THET2, Q72LJ9_THET2, GCST_THET2, Q72KD6_THET2, Q72GN5_THET2, Q72K94_THET2, Q72H54_THET2	821	29	4254	1.60805	1	0.618196	91.2828
GOTERM_MF_FAT	GO:0019842~vitamin binding	22	2.67966	0.454807	LYSN_THET2, ACP_THET2, Q72GY8_THET2, Q72LH2_THET2, Q72JL3_THET2, Q72LJ9_THET2, Q72LA9_THET2, Q72JL4_THET2, Q72JU2_THET2, Q72H54_THET2, Q72K94_THET2, Q72I76_THET2, Q72J97_THET2, Q72KV7_THET2, Q72L50_THET2, Q72JC6_THET2, GCSPB_THET2, Q72KD6_THET2, Q72GZ7_THET2, Q72GN5_THET2, Q72JU1_THET2, GLYA_THET2	522	81	2095	1.09006	1	0.999878	99.9874
GOTERM_MF_FAT	GO:0008483~transaminase activity	9	1.09622	0.521066	LYSN_THET2, Q72I76_THET2, GLMS_THET2, Q72LJ9_THET2, GCST_THET2, Q72KD6_THET2, Q72GN5_THET2, Q72K94_THET2, Q72H54_THET2	522	31	2095	1.16518	1	0.999928	99.9981
GOTERM_MF_FAT	GO:0016769~transferase activity, transferring nitrogenous groups	9	1.09622	0.637842	LYSN_THET2, Q72I76_THET2, GLMS_THET2, Q72LJ9_THET2, GCST_THET2, Q72KD6_THET2, Q72GN5_THET2, Q72K94_THET2, Q72H54_THET2	522	34	2095	1.06237	1	0.999981	100
GOTERM_MF_FAT	GO:0070279~vitamin B6 binding	14	1.70524	0.664992	LYSN_THET2, Q72GY8_THET2, Q72LH2_THET2, Q72LJ9_THET2, Q72LA9_THET2, Q72H54_THET2, Q72K94_THET2, Q72I76_THET2, Q72KV7_THET2, Q72L50_THET2, GCSPB_THET2, Q72KD6_THET2, Q72GN5_THET2, GLYA_THET2	522	56	2095	1.00335	1	0.999985	100
GOTERM_MF_FAT	GO:0030170~pyridoxal phosphate binding	14	1.70524	0.664992	LYSN_THET2, Q72GY8_THET2, Q72LH2_THET2, Q72LJ9_THET2, Q72LA9_THET2, Q72H54_THET2, Q72K94_THET2, Q72I76_THET2, Q72KV7_THET2, Q72L50_THET2, GCSPB_THET2, Q72KD6_THET2, Q72GN5_THET2, GLYA_THET2	522	56	2095	1.00335	1	0.999985	100
INTERPRO	IPR004839:Aminotransferase, class I and II	4	0.487211	0.68298	LYSN_THET2, Q72I76_THET2, Q72LJ9_THET2, Q72H54_THET2	733	16	3493	1.19134	1	1	100
Annotation Cluster 40	Enrichment Score: 0.40498463088880965
Category	Term	Count	%	PValue	Genes	List Total	Pop Hits	Pop Total	Fold Enrichment	Bonferroni	Benjamini	FDR
INTERPRO	IPR002559:Transposase, IS4-like	10	1.21803	0.0264785	Q72GG7_THET2, Q72KZ2_THET2, Q746G3_THET2, Q72KK4_THET2, Q745U7_THET2	733	22	3493	2.16607	1	0.999884	35.6115
GOTERM_MF_FAT	GO:0004803~transposase activity	10	1.21803	0.695613	Q72GG7_THET2, Q72KZ2_THET2, Q746G3_THET2, Q72KK4_THET2, Q745U7_THET2	522	40	2095	1.00335	1	0.999986	100
GOTERM_BP_FAT	GO:0006313~transposition, DNA-mediated	10	1.21803	0.711185	Q72GG7_THET2, Q72KZ2_THET2, Q746G3_THET2, Q72KK4_THET2, Q745U7_THET2	447	40	1772	0.991051	1	0.999809	100
GOTERM_BP_FAT	GO:0032196~transposition	10	1.21803	0.793004	Q72GG7_THET2, Q72KZ2_THET2, Q746G3_THET2, Q72KK4_THET2, Q745U7_THET2	447	43	1772	0.921908	1	0.999911	100
GOTERM_BP_FAT	GO:0006310~DNA recombination	14	1.70524	0.908986	Q72G97_THET2, Q72JG9_THET2, RECA_THET2, Q72GG7_THET2, Q72KZ2_THET2, Q746G3_THET2, Q72KK4_THET2, RUVC_THET2, Q745U7_THET2	447	68	1772	0.81616	1	0.999986	100
Annotation Cluster 41	Enrichment Score: 0.39280341609870856
Category	Term	Count	%	PValue	Genes	List Total	Pop Hits	Pop Total	Fold Enrichment	Bonferroni	Benjamini	FDR
SP_PIR_KEYWORDS	trna processing	10	1.21803	0.0598514	TRMD_THET2, TRMI_THET2, TRUA_THET2, TRMFO_THET2, MIAA_THET2, TGT_THET2, MNME_THET2, TRUD_THET2, MNMA_THET2, TRUB_THET2	821	27	4254	1.91907	0.999978	0.37306	53.0411
UP_SEQ_FEATURE	active site:Nucleophile	10	1.21803	0.260371	TRUA_THET2, TGT_THET2, CARA_THET2, TRUD_THET2, MNMA_THET2, GUAA_THET2, PDXT_THET2, TRUB_THET2, PURQ_THET2, HEM1_THET2	185	23	593	1.39365	1	1	98.3457
GOTERM_BP_FAT	GO:0006400~tRNA modification	8	0.974421	0.261409	TRMD_THET2, TRMI_THET2, TRUA_THET2, TGT_THET2, MNME_THET2, TRUD_THET2, MNMA_THET2, TRUB_THET2	447	21	1772	1.51017	1	0.999388	98.8447
GOTERM_BP_FAT	GO:0031119~tRNA pseudouridine synthesis	3	0.365408	0.370763	TRUA_THET2, TRUD_THET2, TRUB_THET2	447	5	1772	2.37852	1	0.999051	99.8908
GOTERM_BP_FAT	GO:0008033~tRNA processing	11	1.33983	0.420654	TRMD_THET2, TRMI_THET2, SYFB_THET2, TRUA_THET2, TRMFO_THET2, MIAA_THET2, TGT_THET2, MNME_THET2, TRUD_THET2, MNMA_THET2, TRUB_THET2	447	36	1772	1.21129	1	0.998724	99.9676
GOTERM_BP_FAT	GO:0034470~ncRNA processing	15	1.82704	0.43706	TRMD_THET2, Q72L94_THET2, TRMFO_THET2, TGT_THET2, MIAA_THET2, RSMG_THET2, MNMA_THET2, TRUD_THET2, RIMM_THET2, TRMI_THET2, TRUA_THET2, SYFB_THET2, MNME_THET2, TRUB_THET2, Q72K73_THET2	447	52	1772	1.14352	1	0.998963	99.9788
GOTERM_BP_FAT	GO:0006396~RNA processing	19	2.31425	0.532657	TRMD_THET2, RL1_THET2, Q72L94_THET2, TRMFO_THET2, MIAA_THET2, TGT_THET2, Q72GY4_THET2, RSMG_THET2, TRUD_THET2, MNMA_THET2, RIMM_THET2, TRMI_THET2, TRUA_THET2, SYFB_THET2, MNME_THET2, Q72JF4_THET2, TRUB_THET2, Q72K73_THET2, PNP_THET2	447	71	1772	1.06084	1	0.999155	99.9986
GOTERM_MF_FAT	GO:0008175~tRNA methyltransferase activity	4	0.487211	0.541089	TRMD_THET2, TRMI_THET2, TRMFO_THET2, MNMA_THET2	522	11	2095	1.45942	1	0.999938	99.999
GOTERM_BP_FAT	GO:0009451~RNA modification	9	1.09622	0.577395	TRMD_THET2, TRMI_THET2, TRUA_THET2, Q72L94_THET2, TGT_THET2, MNME_THET2, TRUD_THET2, MNMA_THET2, TRUB_THET2	447	32	1772	1.11493	1	0.999402	99.9997
GOTERM_MF_FAT	GO:0008173~RNA methyltransferase activity	8	0.974421	0.647179	TRMD_THET2, TRMI_THET2, Q72L94_THET2, TRMFO_THET2, Q72GY4_THET2, RSMG_THET2, MNMA_THET2, Q72JF4_THET2	522	30	2095	1.07024	1	0.999982	100
GOTERM_MF_FAT	GO:0009982~pseudouridine synthase activity	3	0.365408	0.80092	TRUA_THET2, TRUD_THET2, TRUB_THET2	522	11	2095	1.09457	1	0.999998	100
GOTERM_BP_FAT	GO:0001522~pseudouridine synthesis	3	0.365408	0.807249	TRUA_THET2, TRUD_THET2, TRUB_THET2	447	11	1772	1.08115	1	0.999935	100
Annotation Cluster 42	Enrichment Score: 0.3579989475293589
Category	Term	Count	%	PValue	Genes	List Total	Pop Hits	Pop Total	Fold Enrichment	Bonferroni	Benjamini	FDR
KEGG_PATHWAY	tth00860:Porphyrin and chlorophyll metabolism	17	2.07065	0.00154712	Q746P0_THET2, Q746P2_THET2, Q746N9_THET2, Q72L33_THET2, DCUP_THET2, Q746N0_THET2, Q746N4_THET2, HEM1_THET2, SYE_THET2, COXX_THET2, HEMH_THET2, CBID_THET2, Q746P3_THET2, Q72KM1_THET2, Q746N6_THET2, Q746Q1_THET2, Q746P1_THET2	347	29	1244	2.10156	0.169559	0.0261935	1.76167
GOTERM_BP_FAT	GO:0033013~tetrapyrrole metabolic process	18	2.19245	0.357791	Q746P0_THET2, Q746P2_THET2, Q746N9_THET2, Q72GR3_THET2, Q72L33_THET2, DCUP_THET2, Q746N0_THET2, Q746N4_THET2, HEM1_THET2, COXX_THET2, HEMH_THET2, Q72JA0_THET2, CBID_THET2, Q746P3_THET2, Q72KM1_THET2, Q746N6_THET2, Q746Q1_THET2, Q746P1_THET2	447	61	1772	1.16977	1	0.9991	99.8525
GOTERM_BP_FAT	GO:0033014~tetrapyrrole biosynthetic process	18	2.19245	0.357791	Q746P0_THET2, Q746P2_THET2, Q746N9_THET2, Q72GR3_THET2, Q72L33_THET2, DCUP_THET2, Q746N0_THET2, Q746N4_THET2, HEM1_THET2, COXX_THET2, HEMH_THET2, Q72JA0_THET2, CBID_THET2, Q746P3_THET2, Q72KM1_THET2, Q746N6_THET2, Q746Q1_THET2, Q746P1_THET2	447	61	1772	1.16977	1	0.9991	99.8525
GOTERM_BP_FAT	GO:0006779~porphyrin biosynthetic process	17	2.07065	0.412598	Q746P0_THET2, Q746P2_THET2, Q746N9_THET2, Q72GR3_THET2, Q72L33_THET2, DCUP_THET2, Q746N0_THET2, Q746N4_THET2, HEM1_THET2, COXX_THET2, HEMH_THET2, Q72JA0_THET2, CBID_THET2, Q746P3_THET2, Q746N6_THET2, Q746Q1_THET2, Q746P1_THET2	447	59	1772	1.14223	1	0.998861	99.9603
GOTERM_BP_FAT	GO:0006778~porphyrin metabolic process	17	2.07065	0.412598	Q746P0_THET2, Q746P2_THET2, Q746N9_THET2, Q72GR3_THET2, Q72L33_THET2, DCUP_THET2, Q746N0_THET2, Q746N4_THET2, HEM1_THET2, COXX_THET2, HEMH_THET2, Q72JA0_THET2, CBID_THET2, Q746P3_THET2, Q746N6_THET2, Q746Q1_THET2, Q746P1_THET2	447	59	1772	1.14223	1	0.998861	99.9603
GOTERM_BP_FAT	GO:0051188~cofactor biosynthetic process	37	4.5067	0.45271	Q72LK4_THET2, Q746P0_THET2, PANC_THET2, Q746P2_THET2, Q746N9_THET2, Q72GR3_THET2, Q746N0_THET2, Q72HV8_THET2, Q72HL9_THET2, Q746N4_THET2, Q72KR6_THET2, Q72GF4_THET2, Q72HJ8_THET2, Q746N6_THET2, PDXT_THET2, Q72GQ3_THET2, Q746P1_THET2, Q72I60_THET2, NADD_THET2, FTHS_THET2, Q72L33_THET2, DCUP_THET2, Q72ID7_THET2, COMB_THET2, Q72HU7_THET2, HEM1_THET2, COXX_THET2, HEMH_THET2, Q72JA0_THET2, LIPA_THET2,…	447	139	1772	1.05522	1	0.998725	99.986
GOTERM_BP_FAT	GO:0009235~cobalamin metabolic process	9	1.09622	0.616298	Q746P0_THET2, Q72JA0_THET2, Q746P2_THET2, CBID_THET2, Q746N9_THET2, Q746P3_THET2, Q746Q1_THET2, Q746N0_THET2, Q746N4_THET2	447	33	1772	1.08115	1	0.999492	99.9999
GOTERM_BP_FAT	GO:0009236~cobalamin biosynthetic process	9	1.09622	0.616298	Q746P0_THET2, Q72JA0_THET2, Q746P2_THET2, CBID_THET2, Q746N9_THET2, Q746P3_THET2, Q746Q1_THET2, Q746N0_THET2, Q746N4_THET2	447	33	1772	1.08115	1	0.999492	99.9999
GOTERM_BP_FAT	GO:0051186~cofactor metabolic process	43	5.23752	0.62551	Q72LK4_THET2, MDH_THET2, TPIS_THET2, Q746P0_THET2, PANC_THET2, Q746P2_THET2, Q746N9_THET2, Q72GR3_THET2, Q746N0_THET2, Q72HV8_THET2, Q72HL9_THET2, Q746N4_THET2, Q72KR6_THET2, Q72GZ6_THET2, Q72GF4_THET2, Q72HJ8_THET2, Q746N6_THET2, CAPP_THET2, PDXT_THET2, Q72GQ3_THET2, Q72GU9_THET2, Q746P1_THET2, Q72I60_THET2, NADD_THET2, Q72L91_THET2, FTHS_THET2, Q72L33_THET2, DCUP_THET2, Q72ID7_THET2, COMB_THET2…	447	172	1772	0.991051	1	0.999535	99.9999
GOTERM_BP_FAT	GO:0018130~heterocycle biosynthetic process	31	3.77588	0.8466	Q746P0_THET2, Q746P2_THET2, Q746N9_THET2, Q72GR3_THET2, Q746N0_THET2, Q72HL9_THET2, Q746N4_THET2, HISZ_THET2, HISX_THET2, Q72GF4_THET2, Q746N6_THET2, THII_THET2, Q746P1_THET2, PROB_THET2, Q72L33_THET2, DCUP_THET2, HIS4_THET2, HEM1_THET2, P5CR_THET2, COXX_THET2, HEMH_THET2, Q72JA0_THET2, LIPA_THET2, Q72GB9_THET2, CBID_THET2, Q72KM1_THET2, Q746P3_THET2, Q746Q1_THET2, DXS_THET2, PROA_THET2, LIPB_THE…	447	137	1772	0.89701	1	0.999958	100
GOTERM_BP_FAT	GO:0009108~coenzyme biosynthetic process	15	1.82704	0.849021	Q72LK4_THET2, NADD_THET2, PANC_THET2, FTHS_THET2, Q72ID7_THET2, COMB_THET2, Q72HL9_THET2, Q72HU7_THET2, Q72GF4_THET2, LIPA_THET2, Q72J06_THET2, Q72H55_THET2, PDXT_THET2, Q72GQ3_THET2, LIPB_THET2	447	68	1772	0.874457	1	0.999958	100
GOTERM_BP_FAT	GO:0006732~coenzyme metabolic process	21	2.55786	0.894021	Q72LK4_THET2, MDH_THET2, TPIS_THET2, NADD_THET2, PANC_THET2, Q72L91_THET2, FTHS_THET2, Q72ID7_THET2, Q72HU7_THET2, COMB_THET2, Q72HL9_THET2, Q72GZ6_THET2, Q72GF4_THET2, LIPA_THET2, CAPP_THET2, Q72J06_THET2, Q72H55_THET2, PDXT_THET2, Q72GQ3_THET2, Q72GU9_THET2, LIPB_THET2	447	98	1772	0.849473	1	0.999977	100
GOTERM_BP_FAT	GO:0042364~water-soluble vitamin biosynthetic process	15	1.82704	0.939853	Q746P0_THET2, Q72JA0_THET2, NADD_THET2, Q746P2_THET2, Q72JR9_THET2, CBID_THET2, Q72JS1_THET2, Q746N9_THET2, Q746P3_THET2, THII_THET2, Q746Q1_THET2, DXS_THET2, PDXT_THET2, Q746N0_THET2, Q746N4_THET2	447	76	1772	0.782409	1	0.999995	100
GOTERM_BP_FAT	GO:0006767~water-soluble vitamin metabolic process	15	1.82704	0.939853	Q746P0_THET2, Q72JA0_THET2, NADD_THET2, Q746P2_THET2, Q72JR9_THET2, CBID_THET2, Q72JS1_THET2, Q746N9_THET2, Q746P3_THET2, THII_THET2, Q746Q1_THET2, DXS_THET2, PDXT_THET2, Q746N0_THET2, Q746N4_THET2	447	76	1772	0.782409	1	0.999995	100
GOTERM_BP_FAT	GO:0009110~vitamin biosynthetic process	15	1.82704	0.953321	Q746P0_THET2, Q72JA0_THET2, NADD_THET2, Q746P2_THET2, Q72JR9_THET2, CBID_THET2, Q72JS1_THET2, Q746N9_THET2, Q746P3_THET2, THII_THET2, Q746Q1_THET2, DXS_THET2, PDXT_THET2, Q746N0_THET2, Q746N4_THET2	447	78	1772	0.762347	1	0.999998	100
GOTERM_BP_FAT	GO:0006766~vitamin metabolic process	15	1.82704	0.953321	Q746P0_THET2, Q72JA0_THET2, NADD_THET2, Q746P2_THET2, Q72JR9_THET2, CBID_THET2, Q72JS1_THET2, Q746N9_THET2, Q746P3_THET2, THII_THET2, Q746Q1_THET2, DXS_THET2, PDXT_THET2, Q746N0_THET2, Q746N4_THET2	447	78	1772	0.762347	1	0.999998	100
Annotation Cluster 43	Enrichment Score: 0.3461949652531547
Category	Term	Count	%	PValue	Genes	List Total	Pop Hits	Pop Total	Fold Enrichment	Bonferroni	Benjamini	FDR
GOTERM_BP_FAT	GO:0006457~protein folding	8	0.974421	0.218474	HSLO_THET2, Q72H58_THET2, DNAJ_THET2, CH60_THET2, GRPE_THET2, CLPX_THET2, Q72IK7_THET2, Q72H64_THET2, TIG_THET2	447	20	1772	1.58568	1	0.998971	97.3456
SP_PIR_KEYWORDS	Rotamase	3	0.365408	0.475362	Q72H58_THET2, Q72H64_THET2, TIG_THET2	821	8	4254	1.94306	1	0.870061	99.9629
GOTERM_MF_FAT	GO:0016859~cis-trans isomerase activity	3	0.365408	0.630084	Q72H58_THET2, Q72H64_THET2, TIG_THET2	522	8	2095	1.50503	1	0.99998	100
GOTERM_MF_FAT	GO:0003755~peptidyl-prolyl cis-trans isomerase activity	3	0.365408	0.630084	Q72H58_THET2, Q72H64_THET2, TIG_THET2	522	8	2095	1.50503	1	0.99998	100
Annotation Cluster 44	Enrichment Score: 0.3380568024163923
Category	Term	Count	%	PValue	Genes	List Total	Pop Hits	Pop Total	Fold Enrichment	Bonferroni	Benjamini	FDR
GOTERM_MF_FAT	GO:0008408~3'-5' exonuclease activity	4	0.487211	0.240619	Q72GP2_THET2, Q72K93_THET2, Q72H86_THET2, PNP_THET2	522	7	2095	2.29338	1	0.996256	98.2983
GOTERM_MF_FAT	GO:0004527~exonuclease activity	7	0.852619	0.427805	Q72GP2_THET2, Q72JG9_THET2, Q72J56_THET2, Q72K93_THET2, Q72H86_THET2, Q72L57_THET2, PNP_THET2	522	21	2095	1.3378	1	0.999836	99.9742
GOTERM_MF_FAT	GO:0004518~nuclease activity	11	1.33983	0.940272	Q72GP2_THET2, Q72JG9_THET2, Q72J56_THET2, Q72K93_THET2, Q72IG1_THET2, Q72HF2_THET2, Q72H86_THET2, Q72IQ7_THET2, Q72L57_THET2, PNP_THET2, RUVC_THET2	522	58	2095	0.761164	1	1	100
Annotation Cluster 45	Enrichment Score: 0.31958185816182566
Category	Term	Count	%	PValue	Genes	List Total	Pop Hits	Pop Total	Fold Enrichment	Bonferroni	Benjamini	FDR
KEGG_PATHWAY	tth00380:Tryptophan metabolism	5	0.609013	0.366252	Q72KT2_THET2, Q72JB4_THET2, Q72KD3_THET2, Q72L72_THET2, Q72GZ7_THET2	347	11	1244	1.62955	1	0.75424	99.4677
KEGG_PATHWAY	tth00310:Lysine degradation	5	0.609013	0.366252	Q72KT2_THET2, Q72GZ6_THET2, Q72KD3_THET2, Q72L72_THET2, Q72GZ7_THET2	347	11	1244	1.62955	1	0.75424	99.4677
KEGG_PATHWAY	tth00071:Fatty acid metabolism	5	0.609013	0.819773	Q72KT2_THET2, Q72HC0_THET2, Q72KD3_THET2, Q72L72_THET2, Q72L25_THET2	347	19	1244	0.943425	1	0.977804	100
Annotation Cluster 46	Enrichment Score: 0.31786328037880146
Category	Term	Count	%	PValue	Genes	List Total	Pop Hits	Pop Total	Fold Enrichment	Bonferroni	Benjamini	FDR
KEGG_PATHWAY	tth00300:Lysine biosynthesis	8	0.974421	0.126482	LYSN_THET2, Q72JQ4_THET2, Q72HE6_THET2, LYSK_THET2, AK_THET2, Q72GE4_THET2, ARGC_THET2, HOSC_THET2	347	16	1244	1.79251	1	0.477478	78.8242
GOTERM_BP_FAT	GO:0006553~lysine metabolic process	5	0.609013	0.484889	Q72HE6_THET2, LYSK_THET2, AK_THET2, ARGC_THET2, HOSC_THET2	447	14	1772	1.41579	1	0.998908	99.9943
GOTERM_BP_FAT	GO:0009085~lysine biosynthetic process	5	0.609013	0.484889	Q72HE6_THET2, LYSK_THET2, AK_THET2, ARGC_THET2, HOSC_THET2	447	14	1772	1.41579	1	0.998908	99.9943
SP_PIR_KEYWORDS	Lysine biosynthesis	4	0.487211	0.524657	LYSK_THET2, AK_THET2, ARGC_THET2, HOSC_THET2	821	14	4254	1.48042	1	0.892595	99.9889
GOTERM_BP_FAT	GO:0009066~aspartate family amino acid metabolic process	8	0.974421	0.860751	Q72HE6_THET2, KHSE_THET2, LYSK_THET2, AK_THET2, ARGC_THET2, TDH_THET2, Q72IE7_THET2, HOSC_THET2	447	37	1772	0.857126	1	0.999964	100
GOTERM_BP_FAT	GO:0009067~aspartate family amino acid biosynthetic process	7	0.852619	0.922051	Q72HE6_THET2, KHSE_THET2, LYSK_THET2, AK_THET2, ARGC_THET2, Q72IE7_THET2, HOSC_THET2	447	36	1772	0.770818	1	0.999992	100
Annotation Cluster 47	Enrichment Score: 0.31476540158325134
Category	Term	Count	%	PValue	Genes	List Total	Pop Hits	Pop Total	Fold Enrichment	Bonferroni	Benjamini	FDR
GOTERM_BP_FAT	GO:0043933~macromolecular complex subunit organization	12	1.46163	0.2813	COXX_THET2, Q72JP4_THET2, NUSB_THET2, Q72IU1_THET2, Q72IU4_THET2, Q72KG4_THET2, RL20_THET2, Q72GJ6_THET2, Q745Z1_THET2, RRF_THET2, Q72IU0_THET2, Q72GW1_THET2	447	36	1772	1.3214	1	0.999415	99.227
GOTERM_BP_FAT	GO:0034621~cellular macromolecular complex subunit organization	10	1.21803	0.333395	Q72JP4_THET2, NUSB_THET2, Q72IU1_THET2, Q72IU4_THET2, Q72KG4_THET2, RL20_THET2, Q72GJ6_THET2, RRF_THET2, Q72IU0_THET2, Q72GW1_THET2	447	30	1772	1.3214	1	0.999255	99.7447
GOTERM_BP_FAT	GO:0022411~cellular component disassembly	5	0.609013	0.356267	NUSB_THET2, Q72KG4_THET2, Q72GJ6_THET2, RRF_THET2, Q72GW1_THET2	447	12	1772	1.65175	1	0.999231	99.8473
GOTERM_BP_FAT	GO:0034623~cellular macromolecular complex disassembly	5	0.609013	0.356267	NUSB_THET2, Q72KG4_THET2, Q72GJ6_THET2, RRF_THET2, Q72GW1_THET2	447	12	1772	1.65175	1	0.999231	99.8473
GOTERM_BP_FAT	GO:0032984~macromolecular complex disassembly	5	0.609013	0.356267	NUSB_THET2, Q72KG4_THET2, Q72GJ6_THET2, RRF_THET2, Q72GW1_THET2	447	12	1772	1.65175	1	0.999231	99.8473
GOTERM_BP_FAT	GO:0043624~cellular protein complex disassembly	5	0.609013	0.356267	NUSB_THET2, Q72KG4_THET2, Q72GJ6_THET2, RRF_THET2, Q72GW1_THET2	447	12	1772	1.65175	1	0.999231	99.8473
GOTERM_BP_FAT	GO:0043241~protein complex disassembly	5	0.609013	0.356267	NUSB_THET2, Q72KG4_THET2, Q72GJ6_THET2, RRF_THET2, Q72GW1_THET2	447	12	1772	1.65175	1	0.999231	99.8473
SP_PIR_KEYWORDS	transcription termination	3	0.365408	0.403321	NUSB_THET2, Q72KG4_THET2, Q72GW1_THET2	821	7	4254	2.22064	1	0.840173	99.8208
GOTERM_MF_FAT	GO:0051184~cofactor transporter activity	3	0.365408	0.463085	Q72IU1_THET2, Q72IU4_THET2, Q72IU0_THET2	522	6	2095	2.0067	1	0.999879	99.9899
GOTERM_MF_FAT	GO:0015232~heme transporter activity	3	0.365408	0.463085	Q72IU1_THET2, Q72IU4_THET2, Q72IU0_THET2	522	6	2095	2.0067	1	0.999879	99.9899
GOTERM_BP_FAT	GO:0051181~cofactor transport	3	0.365408	0.47025	Q72IU1_THET2, Q72IU4_THET2, Q72IU0_THET2	447	6	1772	1.9821	1	0.998704	99.9913
GOTERM_BP_FAT	GO:0015886~heme transport	3	0.365408	0.47025	Q72IU1_THET2, Q72IU4_THET2, Q72IU0_THET2	447	6	1772	1.9821	1	0.998704	99.9913
GOTERM_BP_FAT	GO:0065003~macromolecular complex assembly	7	0.852619	0.586337	COXX_THET2, Q72JP4_THET2, Q72IU1_THET2, Q72IU4_THET2, RL20_THET2, Q745Z1_THET2, Q72IU0_THET2	447	24	1772	1.15623	1	0.999445	99.9998
GOTERM_BP_FAT	GO:0006353~transcription termination	3	0.365408	0.637657	NUSB_THET2, Q72KG4_THET2, Q72GW1_THET2	447	8	1772	1.48658	1	0.999601	100
GOTERM_BP_FAT	GO:0034622~cellular macromolecular complex assembly	5	0.609013	0.70127	Q72JP4_THET2, Q72IU1_THET2, Q72IU4_THET2, RL20_THET2, Q72IU0_THET2	447	18	1772	1.10117	1	0.999803	100
GOTERM_BP_FAT	GO:0070271~protein complex biogenesis	6	0.730816	0.724615	COXX_THET2, Q72JP4_THET2, Q72IU1_THET2, Q72IU4_THET2, Q745Z1_THET2, Q72IU0_THET2	447	23	1772	1.03414	1	0.999847	100
GOTERM_BP_FAT	GO:0006461~protein complex assembly	6	0.730816	0.724615	COXX_THET2, Q72JP4_THET2, Q72IU1_THET2, Q72IU4_THET2, Q745Z1_THET2, Q72IU0_THET2	447	23	1772	1.03414	1	0.999847	100
GOTERM_BP_FAT	GO:0043623~cellular protein complex assembly	4	0.487211	0.84139	Q72JP4_THET2, Q72IU1_THET2, Q72IU4_THET2, Q72IU0_THET2	447	17	1772	0.932754	1	0.999962	100
GOTERM_BP_FAT	GO:0017004~cytochrome complex assembly	3	0.365408	0.876982	Q72IU1_THET2, Q72IU4_THET2, Q72IU0_THET2	447	13	1772	0.914817	1	0.99997	100
Annotation Cluster 48	Enrichment Score: 0.3144719358903026
Category	Term	Count	%	PValue	Genes	List Total	Pop Hits	Pop Total	Fold Enrichment	Bonferroni	Benjamini	FDR
GOTERM_CC_FAT	GO:0030312~external encapsulating structure	13	1.58343	0.325965	Q72JA6_THET2, Q72K56_THET2, Q72IW4_THET2, DDL_THET2, Q72KH0_THET2, Q72JG5_THET2, Q72GQ8_THET2, Q72KF0_THET2, Q72JA2_THET2, Q72JF3_THET2, MURG_THET2, Q72HN0_THET2, Q72L19_THET2	127	41	499	1.24582	1	0.977923	98.0253
GOTERM_CC_FAT	GO:0030313~cell envelope	11	1.33983	0.424433	Q72JG5_THET2, Q72JA6_THET2, Q72GQ8_THET2, Q72K56_THET2, Q72KF0_THET2, Q72IW4_THET2, Q72JA2_THET2, Q72HN0_THET2, MURG_THET2, Q72L19_THET2, Q72KH0_THET2	127	36	499	1.20057	1	0.981774	99.5897
GOTERM_CC_FAT	GO:0031975~envelope	11	1.33983	0.424433	Q72JG5_THET2, Q72JA6_THET2, Q72GQ8_THET2, Q72K56_THET2, Q72KF0_THET2, Q72IW4_THET2, Q72JA2_THET2, Q72HN0_THET2, MURG_THET2, Q72L19_THET2, Q72KH0_THET2	127	36	499	1.20057	1	0.981774	99.5897
GOTERM_CC_FAT	GO:0044462~external encapsulating structure part	8	0.974421	0.543979	Q72JG5_THET2, Q72JA6_THET2, Q72GQ8_THET2, Q72K56_THET2, Q72IW4_THET2, Q72HN0_THET2, Q72L19_THET2, Q72KH0_THET2	127	27	499	1.16419	1	0.984081	99.9595
GOTERM_CC_FAT	GO:0030288~outer membrane-bounded periplasmic space	7	0.852619	0.63738	Q72JG5_THET2, Q72JA6_THET2, Q72GQ8_THET2, Q72K56_THET2, Q72HN0_THET2, Q72L19_THET2, Q72KH0_THET2	127	25	499	1.10016	1	0.985042	99.9959
GOTERM_CC_FAT	GO:0042597~periplasmic space	7	0.852619	0.63738	Q72JG5_THET2, Q72JA6_THET2, Q72GQ8_THET2, Q72K56_THET2, Q72HN0_THET2, Q72L19_THET2, Q72KH0_THET2	127	25	499	1.10016	1	0.985042	99.9959
Annotation Cluster 49	Enrichment Score: 0.281381157221594
Category	Term	Count	%	PValue	Genes	List Total	Pop Hits	Pop Total	Fold Enrichment	Bonferroni	Benjamini	FDR
SMART	SM00028:TPR	5	0.609013	0.425636	Q72G67_THET2, Q72LK6_THET2, Q72IC8_THET2, Q72IU7_THET2, Q72I37_THET2	108	17	552	1.50327	1	0.999995	99.655
INTERPRO	IPR011990:Tetratricopeptide-like helical	7	0.852619	0.43036	Q72G67_THET2, Q72LK6_THET2, Q72IC8_THET2, Q72IU7_THET2, Q72H51_THET2, Q72HK1_THET2, Q72I37_THET2	733	25	3493	1.3343	1	1	99.9902
INTERPRO	IPR001440:Tetratricopeptide TPR-1	5	0.609013	0.491073	Q72G67_THET2, Q72LK6_THET2, Q72IC8_THET2, Q72IU7_THET2, Q72I37_THET2	733	17	3493	1.40157	1	1	99.9985
INTERPRO	IPR019734:Tetratricopeptide repeat	5	0.609013	0.491073	Q72G67_THET2, Q72LK6_THET2, Q72IC8_THET2, Q72IU7_THET2, Q72I37_THET2	733	17	3493	1.40157	1	1	99.9985
INTERPRO	IPR013026:Tetratricopeptide region	5	0.609013	0.586305	Q72G67_THET2, Q72LK6_THET2, Q72IC8_THET2, Q72IU7_THET2, Q72I37_THET2	733	19	3493	1.25404	1	1	99.9999
INTERPRO	IPR013105:Tetratricopeptide TPR2	3	0.365408	0.791457	Q72G67_THET2, Q72LK6_THET2, Q72I37_THET2	733	13	3493	1.0997	1	1	100
Annotation Cluster 50	Enrichment Score: 0.27365966828972277
Category	Term	Count	%	PValue	Genes	List Total	Pop Hits	Pop Total	Fold Enrichment	Bonferroni	Benjamini	FDR
GOTERM_MF_FAT	GO:0016878~acid-thiol ligase activity	4	0.487211	0.395636	Q72L91_THET2, Q72GY5_THET2, Q72J93_THET2, Q72J60_THET2	522	9	2095	1.78374	1	0.999749	99.942
GOTERM_MF_FAT	GO:0016877~ligase activity, forming carbon-sulfur bonds	4	0.487211	0.605797	Q72L91_THET2, Q72GY5_THET2, Q72J93_THET2, Q72J60_THET2	522	12	2095	1.3378	1	0.999967	99.9999
GOTERM_MF_FAT	GO:0016405~CoA-ligase activity	3	0.365408	0.630084	Q72L91_THET2, Q72J93_THET2, Q72J60_THET2	522	8	2095	1.50503	1	0.99998	100
Annotation Cluster 51	Enrichment Score: 0.2729613897068812
Category	Term	Count	%	PValue	Genes	List Total	Pop Hits	Pop Total	Fold Enrichment	Bonferroni	Benjamini	FDR
INTERPRO	IPR014710:RmlC-like jelly roll fold	5	0.609013	0.440163	Q72J01_THET2, Q72ID0_THET2, Q72IN5_THET2, Q72IR0_THET2, Q72IY7_THET2	733	16	3493	1.48917	1	1	99.9926
SMART	SM00419:HTH_CRP	3	0.365408	0.479433	Q72ID0_THET2, Q72IR0_THET2, Q72IY7_THET2	108	8	552	1.91667	1	0.999819	99.8738
INTERPRO	IPR001808:Bacterial regulatory protein, Crp	3	0.365408	0.524602	Q72ID0_THET2, Q72IR0_THET2, Q72IY7_THET2	733	8	3493	1.78701	1	1	99.9995
INTERPRO	IPR012318:Helix-turn-helix motif, Crp-type	3	0.365408	0.524602	Q72ID0_THET2, Q72IR0_THET2, Q72IY7_THET2	733	8	3493	1.78701	1	1	99.9995
SMART	SM00100:cNMP	3	0.365408	0.607424	Q72ID0_THET2, Q72IR0_THET2, Q72IY7_THET2	108	10	552	1.53333	1	0.999966	99.993
INTERPRO	IPR000595:Cyclic nucleotide-binding	3	0.365408	0.652737	Q72ID0_THET2, Q72IR0_THET2, Q72IY7_THET2	733	10	3493	1.4296	1	1	100
Annotation Cluster 52	Enrichment Score: 0.2679158143262521
Category	Term	Count	%	PValue	Genes	List Total	Pop Hits	Pop Total	Fold Enrichment	Bonferroni	Benjamini	FDR
SP_PIR_KEYWORDS	lipoyl	3	0.365408	0.475362	GCSH_THET2, Q72GZ6_THET2, Q72GU4_THET2	821	8	4254	1.94306	1	0.870061	99.9629
INTERPRO	IPR003016:2-oxo acid dehydrogenase, lipoyl-binding site	3	0.365408	0.524602	GCSH_THET2, Q72GZ6_THET2, Q72GU4_THET2	733	8	3493	1.78701	1	1	99.9995
GOTERM_MF_FAT	GO:0031405~lipoic acid binding	3	0.365408	0.630084	GCSH_THET2, Q72GZ6_THET2, Q72GU4_THET2	522	8	2095	1.50503	1	0.99998	100
Annotation Cluster 53	Enrichment Score: 0.2521064455296468
Category	Term	Count	%	PValue	Genes	List Total	Pop Hits	Pop Total	Fold Enrichment	Bonferroni	Benjamini	FDR
GOTERM_BP_FAT	GO:0010605~negative regulation of macromolecule metabolic process	3	0.365408	0.55962	Q72L24_THET2, Q72K09_THET2, NPD_THET2, REX_THET2	447	7	1772	1.69895	1	0.999312	99.9994
GOTERM_BP_FAT	GO:0010558~negative regulation of macromolecule biosynthetic process	3	0.365408	0.55962	Q72L24_THET2, Q72K09_THET2, NPD_THET2, REX_THET2	447	7	1772	1.69895	1	0.999312	99.9994
GOTERM_BP_FAT	GO:0010629~negative regulation of gene expression	3	0.365408	0.55962	Q72L24_THET2, Q72K09_THET2, NPD_THET2, REX_THET2	447	7	1772	1.69895	1	0.999312	99.9994
GOTERM_BP_FAT	GO:0051172~negative regulation of nitrogen compound metabolic process	3	0.365408	0.55962	Q72L24_THET2, Q72K09_THET2, NPD_THET2, REX_THET2	447	7	1772	1.69895	1	0.999312	99.9994
GOTERM_BP_FAT	GO:0045934~negative regulation of nucleobase, nucleoside, nucleotide and nucleic acid metabolic process	3	0.365408	0.55962	Q72L24_THET2, Q72K09_THET2, NPD_THET2, REX_THET2	447	7	1772	1.69895	1	0.999312	99.9994
GOTERM_BP_FAT	GO:0031327~negative regulation of cellular biosynthetic process	3	0.365408	0.55962	Q72L24_THET2, Q72K09_THET2, NPD_THET2, REX_THET2	447	7	1772	1.69895	1	0.999312	99.9994
GOTERM_BP_FAT	GO:0016481~negative regulation of transcription	3	0.365408	0.55962	Q72L24_THET2, Q72K09_THET2, NPD_THET2, REX_THET2	447	7	1772	1.69895	1	0.999312	99.9994
GOTERM_BP_FAT	GO:0009890~negative regulation of biosynthetic process	3	0.365408	0.55962	Q72L24_THET2, Q72K09_THET2, NPD_THET2, REX_THET2	447	7	1772	1.69895	1	0.999312	99.9994
Annotation Cluster 54	Enrichment Score: 0.2517798720576899
Category	Term	Count	%	PValue	Genes	List Total	Pop Hits	Pop Total	Fold Enrichment	Bonferroni	Benjamini	FDR
SP_PIR_KEYWORDS	proline biosynthesis	3	0.365408	0.247908	P5CR_THET2, PROB_THET2, PROA_THET2	821	5	4254	3.10889	1	0.710413	96.9479
GOTERM_BP_FAT	GO:0009084~glutamine family amino acid biosynthetic process	8	0.974421	0.697858	P5CR_THET2, CARB_THET2, ARGJ_THET2, ARGC_THET2, CARA_THET2, Q72IM8_THET2, PROB_THET2, PROA_THET2	447	31	1772	1.02302	1	0.999826	100
GOTERM_BP_FAT	GO:0006561~proline biosynthetic process	3	0.365408	0.704393	P5CR_THET2, PROB_THET2, PROA_THET2	447	9	1772	1.3214	1	0.999797	100
GOTERM_BP_FAT	GO:0006560~proline metabolic process	3	0.365408	0.807249	P5CR_THET2, PROB_THET2, PROA_THET2	447	11	1772	1.08115	1	0.999935	100
Annotation Cluster 55	Enrichment Score: 0.25099355451240857
Category	Term	Count	%	PValue	Genes	List Total	Pop Hits	Pop Total	Fold Enrichment	Bonferroni	Benjamini	FDR
GOTERM_BP_FAT	GO:0022613~ribonucleoprotein complex biogenesis	7	0.852619	0.389433	RIMM_THET2, RL20_THET2, RIMP_THET2, Q72L94_THET2, RSMG_THET2, RL10_THET2, Q72K73_THET2	447	20	1772	1.38747	1	0.998976	99.9299
GOTERM_BP_FAT	GO:0042254~ribosome biogenesis	7	0.852619	0.389433	RIMM_THET2, RL20_THET2, RIMP_THET2, Q72L94_THET2, RSMG_THET2, RL10_THET2, Q72K73_THET2	447	20	1772	1.38747	1	0.998976	99.9299
GOTERM_BP_FAT	GO:0006364~rRNA processing	4	0.487211	0.808313	RIMM_THET2, Q72L94_THET2, RSMG_THET2, Q72K73_THET2	447	16	1772	0.991051	1	0.999931	100
GOTERM_BP_FAT	GO:0016072~rRNA metabolic process	4	0.487211	0.808313	RIMM_THET2, Q72L94_THET2, RSMG_THET2, Q72K73_THET2	447	16	1772	0.991051	1	0.999931	100
Annotation Cluster 56	Enrichment Score: 0.2457065997337853
Category	Term	Count	%	PValue	Genes	List Total	Pop Hits	Pop Total	Fold Enrichment	Bonferroni	Benjamini	FDR
SP_PIR_KEYWORDS	amino-acid biosynthesis	24	2.92326	0.0941899	KHSE_THET2, LYSK_THET2, AROA_THET2, CARB_THET2, ARGJ_THET2, AK_THET2, AROC_THET2, Q72IE7_THET2, HOSC_THET2, HIS4_THET2, ILVD_THET2, ILVC_THET2, LEU3_THET2, HISZ_THET2, P5CR_THET2, HISX_THET2, Q72GB9_THET2, LEUC_THET2, Q72JC6_THET2, ARGC_THET2, CARA_THET2, Q72JC9_THET2, PROB_THET2, PROA_THET2	821	91	4254	1.36655	1	0.436602	70.2283
GOTERM_BP_FAT	GO:0046394~carboxylic acid biosynthetic process	41	4.99391	0.741792	ACCD_THET2, KHSE_THET2, LYSK_THET2, AROC_THET2, Q72JI9_THET2, Q72IE7_THET2, HOSC_THET2, Q72IM8_THET2, ILVC_THET2, Q72L26_THET2, Q72LL4_THET2, LEU3_THET2, HISZ_THET2, HISX_THET2, SYS_THET2, Q72JC9_THET2, CARA_THET2, Q72LN8_THET2, Q72LL1_THET2, PROB_THET2, FABZ_THET2, ACP_THET2, Q72JL3_THET2, AROA_THET2, Q72IW1_THET2, CARB_THET2, ARGJ_THET2, Q72K32_THET2, AK_THET2, HIS4_THET2, ILVD_THET2, P5CR_THET…	447	171	1772	0.950482	1	0.999852	100
GOTERM_BP_FAT	GO:0016053~organic acid biosynthetic process	41	4.99391	0.741792	ACCD_THET2, KHSE_THET2, LYSK_THET2, AROC_THET2, Q72JI9_THET2, Q72IE7_THET2, HOSC_THET2, Q72IM8_THET2, ILVC_THET2, Q72L26_THET2, Q72LL4_THET2, LEU3_THET2, HISZ_THET2, HISX_THET2, SYS_THET2, Q72JC9_THET2, CARA_THET2, Q72LN8_THET2, Q72LL1_THET2, PROB_THET2, FABZ_THET2, ACP_THET2, Q72JL3_THET2, AROA_THET2, Q72IW1_THET2, CARB_THET2, ARGJ_THET2, Q72K32_THET2, AK_THET2, HIS4_THET2, ILVD_THET2, P5CR_THET…	447	171	1772	0.950482	1	0.999852	100
GOTERM_BP_FAT	GO:0009309~amine biosynthetic process	33	4.01949	0.852268	KHSE_THET2, LYSK_THET2, AROC_THET2, Q72IE7_THET2, HOSC_THET2, Q72IM8_THET2, ILVC_THET2, LEU3_THET2, HISZ_THET2, HISX_THET2, SYS_THET2, Q72JC9_THET2, CARA_THET2, Q72LN8_THET2, PROB_THET2, Q72K54_THET2, Q72I55_THET2, AROA_THET2, Q72IW1_THET2, CARB_THET2, ARGJ_THET2, SPEE_THET2, Q72K32_THET2, AK_THET2, HIS4_THET2, ILVD_THET2, P5CR_THET2, Q72HE6_THET2, Q72GB9_THET2, LEUC_THET2, Q72JC6_THET2, ARGC_THE…	447	146	1772	0.896019	1	0.999959	100
GOTERM_BP_FAT	GO:0044271~nitrogen compound biosynthetic process	80	9.74421	0.861326	Q72H76_THET2, KAD_THET2, Q746P0_THET2, KHSE_THET2, LYSK_THET2, Q72J68_THET2, Q72LJ5_THET2, Q72GR3_THET2, Q72IE7_THET2, HOSC_THET2, Q72IM8_THET2, ILVC_THET2, Q746N4_THET2, PURQ_THET2, LEU3_THET2, NDK_THET2, HISX_THET2, SYS_THET2, Q746N6_THET2, Q72KF9_THET2, Q72LC2_THET2, Q72K54_THET2, VATB_THET2, VATA_THET2, Q72IW1_THET2, ARGJ_THET2, TGT_THET2, Q72K32_THET2, Q72K86_THET2, Q72L33_THET2, Q72IH6_THET…	447	343	1772	0.924596	1	0.999961	100
GOTERM_BP_FAT	GO:0008652~cellular amino acid biosynthetic process	30	3.65408	0.881957	KHSE_THET2, LYSK_THET2, AROC_THET2, Q72IE7_THET2, HOSC_THET2, Q72IM8_THET2, ILVC_THET2, LEU3_THET2, HISZ_THET2, HISX_THET2, SYS_THET2, CARA_THET2, Q72JC9_THET2, Q72LN8_THET2, PROB_THET2, AROA_THET2, Q72IW1_THET2, CARB_THET2, ARGJ_THET2, Q72K32_THET2, AK_THET2, HIS4_THET2, ILVD_THET2, P5CR_THET2, Q72HE6_THET2, Q72GB9_THET2, LEUC_THET2, Q72JC6_THET2, ARGC_THET2, PROA_THET2	447	136	1772	0.874457	1	0.999973	100
Annotation Cluster 57	Enrichment Score: 0.239142378331148
Category	Term	Count	%	PValue	Genes	List Total	Pop Hits	Pop Total	Fold Enrichment	Bonferroni	Benjamini	FDR
GOTERM_CC_FAT	GO:0005618~cell wall	5	0.609013	0.488477	Q72KF0_THET2, Q72JA2_THET2, Q72JF3_THET2, MURG_THET2, DDL_THET2	127	14	499	1.40326	1	0.979516	99.8731
GOTERM_CC_FAT	GO:0009274~peptidoglycan-based cell wall	4	0.487211	0.55417	Q72KF0_THET2, Q72JA2_THET2, Q72JF3_THET2, MURG_THET2	127	11	499	1.42878	1	0.979848	99.9677
GOTERM_CC_FAT	GO:0009276~Gram-negative-bacterium-type cell wall	3	0.365408	0.708085	Q72KF0_THET2, Q72JA2_THET2, MURG_THET2	127	9	499	1.30971	1	0.985018	99.9995
Annotation Cluster 58	Enrichment Score: 0.2161800379061202
Category	Term	Count	%	PValue	Genes	List Total	Pop Hits	Pop Total	Fold Enrichment	Bonferroni	Benjamini	FDR
SP_PIR_KEYWORDS	pyrimidine biosynthesis	4	0.487211	0.471578	PYRE_THET2, CARB_THET2, PYRF_THET2, CARA_THET2	821	13	4254	1.5943	1	0.871949	99.9595
GOTERM_BP_FAT	GO:0006220~pyrimidine nucleotide metabolic process	6	0.730816	0.640453	PYRE_THET2, NDK_THET2, KCY_THET2, CARB_THET2, PYRF_THET2, CARA_THET2	447	21	1772	1.13263	1	0.999584	100
GOTERM_BP_FAT	GO:0006221~pyrimidine nucleotide biosynthetic process	5	0.609013	0.743737	PYRE_THET2, NDK_THET2, CARB_THET2, PYRF_THET2, CARA_THET2	447	19	1772	1.04321	1	0.999844	100
Annotation Cluster 59	Enrichment Score: 0.2136876438061053
Category	Term	Count	%	PValue	Genes	List Total	Pop Hits	Pop Total	Fold Enrichment	Bonferroni	Benjamini	FDR
SP_PIR_KEYWORDS	phosphoprotein	11	1.33983	0.281292	ENO_THET2, LDH_THET2, GLMM_THET2, NDK_THET2, Q72L91_THET2, Q72GJ8_THET2, Q72KF9_THET2, Q72IA4_THET2, Q72IJ3_THET2, Q72GJ9_THET2, Q72IY3_THET2, Q72JJ4_THET2	821	42	4254	1.35706	1	0.737254	98.2498
SMART	SM00387:HATPase_c	7	0.852619	0.390397	MUTL_THET2, Q72GJ8_THET2, Q72IA4_THET2, Q72IJ3_THET2, Q72JF5_THET2, Q72GJ9_THET2, Q72IY3_THET2, Q72JJ4_THET2	108	26	552	1.37607	1	1	99.3658
INTERPRO	IPR003594:ATP-binding region, ATPase-like	7	0.852619	0.471305	MUTL_THET2, Q72GJ8_THET2, Q72IA4_THET2, Q72IJ3_THET2, Q72JF5_THET2, Q72GJ9_THET2, Q72IY3_THET2, Q72JJ4_THET2	733	26	3493	1.28298	1	1	99.9971
SMART	SM00388:HisKA	5	0.609013	0.473444	Q72GJ8_THET2, Q72IA4_THET2, Q72IJ3_THET2, Q72GJ9_THET2, Q72IY3_THET2, Q72JJ4_THET2	108	18	552	1.41975	1	0.999975	99.8581
INTERPRO	IPR005467:Signal transduction histidine kinase, core	6	0.730816	0.502392	Q72GJ8_THET2, Q72IA4_THET2, Q72IJ3_THET2, Q72JF5_THET2, Q72GJ9_THET2, Q72IY3_THET2, Q72JJ4_THET2	733	22	3493	1.29964	1	1	99.9989
INTERPRO	IPR003661:Signal transduction histidine kinase, subgroup 1, dimerisation and phosphoacceptor region	5	0.609013	0.539945	Q72GJ8_THET2, Q72IA4_THET2, Q72IJ3_THET2, Q72GJ9_THET2, Q72IY3_THET2, Q72JJ4_THET2	733	18	3493	1.32371	1	1	99.9997
INTERPRO	IPR004358:Signal transduction histidine kinase-related protein, C-terminal	5	0.609013	0.539945	Q72GJ8_THET2, Q72IA4_THET2, Q72IJ3_THET2, Q72GJ9_THET2, Q72IY3_THET2, Q72JJ4_THET2	733	18	3493	1.32371	1	1	99.9997
COG_ONTOLOGY	Signal transduction mechanisms	5	0.609013	0.643637	Q72GJ8_THET2, Q72ID0_THET2, Q72IA4_THET2, Q72JF5_THET2, Q72GJ9_THET2, Q72IR0_THET2	140	22	718	1.16558	1	0.983872	99.9822
GOTERM_BP_FAT	GO:0018202~peptidyl-histidine modification	6	0.730816	0.684419	Q72GJ8_THET2, Q72IA4_THET2, Q72IJ3_THET2, Q72JF5_THET2, Q72GJ9_THET2, Q72IY3_THET2, Q72JJ4_THET2	447	22	1772	1.08115	1	0.999807	100
GOTERM_BP_FAT	GO:0018106~peptidyl-histidine phosphorylation	6	0.730816	0.684419	Q72GJ8_THET2, Q72IA4_THET2, Q72IJ3_THET2, Q72JF5_THET2, Q72GJ9_THET2, Q72IY3_THET2, Q72JJ4_THET2	447	22	1772	1.08115	1	0.999807	100
SMART	SM00304:HAMP	3	0.365408	0.710332	Q72IA4_THET2, Q72IJ3_THET2, Q72IY3_THET2	108	12	552	1.27778	1	0.999992	99.9997
GOTERM_MF_FAT	GO:0000155~two-component sensor activity	6	0.730816	0.713221	Q72GJ8_THET2, Q72IA4_THET2, Q72IJ3_THET2, Q72JF5_THET2, Q72GJ9_THET2, Q72IY3_THET2, Q72JJ4_THET2	522	23	2095	1.04698	1	0.999988	100
GOTERM_MF_FAT	GO:0004673~protein histidine kinase activity	6	0.730816	0.713221	Q72GJ8_THET2, Q72IA4_THET2, Q72IJ3_THET2, Q72JF5_THET2, Q72GJ9_THET2, Q72IY3_THET2, Q72JJ4_THET2	522	23	2095	1.04698	1	0.999988	100
GOTERM_MF_FAT	GO:0016775~phosphotransferase activity, nitrogenous group as acceptor	6	0.730816	0.713221	Q72GJ8_THET2, Q72IA4_THET2, Q72IJ3_THET2, Q72JF5_THET2, Q72GJ9_THET2, Q72IY3_THET2, Q72JJ4_THET2	522	23	2095	1.04698	1	0.999988	100
GOTERM_BP_FAT	GO:0006468~protein amino acid phosphorylation	8	0.974421	0.731588	Q72GJ2_THET2, Q72IA2_THET2, Q72GJ8_THET2, Q72IA4_THET2, Q72IJ3_THET2, Q72JF5_THET2, Q72GJ9_THET2, Q72IY3_THET2, Q72JJ4_THET2	447	32	1772	0.991051	1	0.999843	100
GOTERM_MF_FAT	GO:0004672~protein kinase activity	8	0.974421	0.749868	Q72GJ2_THET2, Q72IA2_THET2, Q72GJ8_THET2, Q72IA4_THET2, Q72IJ3_THET2, Q72JF5_THET2, Q72GJ9_THET2, Q72IY3_THET2, Q72JJ4_THET2	522	33	2095	0.972948	1	0.999993	100
INTERPRO	IPR003660:HAMP linker domain	3	0.365408	0.751755	Q72IA4_THET2, Q72IJ3_THET2, Q72IY3_THET2	733	12	3493	1.19134	1	1	100
SP_PIR_KEYWORDS	two-component regulatory system	5	0.609013	0.767263	Q72GJ8_THET2, Q72IA4_THET2, Q72IJ3_THET2, Q72GJ9_THET2, Q72G70_THET2, Q72IY3_THET2	821	26	4254	0.99644	1	0.969034	100
GOTERM_BP_FAT	GO:0000160~two-component signal transduction system (phosphorelay)	7	0.852619	0.986885	Q72JY5_THET2, Q72GJ8_THET2, Q72IA4_THET2, Q72IJ3_THET2, Q72JF5_THET2, Q72GJ9_THET2, Q72G70_THET2, Q72IY3_THET2	447	46	1772	0.603249	1	1	100
Annotation Cluster 60	Enrichment Score: 0.21354210680728564
Category	Term	Count	%	PValue	Genes	List Total	Pop Hits	Pop Total	Fold Enrichment	Bonferroni	Benjamini	FDR
GOTERM_MF_FAT	GO:0016811~hydrolase activity, acting on carbon-nitrogen (but not peptide) bonds, in linear amides	8	0.974421	0.47861	Q72JA0_THET2, LYSK_THET2, NPD_THET2, DEF_THET2, Q72KA2_THET2, Q746Q1_THET2, Q746N0_THET2, Q72IX5_THET2	522	26	2095	1.2349	1	0.999851	99.9935
INTERPRO	IPR002586:Cobyrinic acid a,c-diamide synthase	3	0.365408	0.592424	Q72JA0_THET2, Q746Q1_THET2, Q746N0_THET2	733	9	3493	1.58845	1	1	100
GOTERM_BP_FAT	GO:0009235~cobalamin metabolic process	9	1.09622	0.616298	Q746P0_THET2, Q72JA0_THET2, Q746P2_THET2, CBID_THET2, Q746N9_THET2, Q746P3_THET2, Q746Q1_THET2, Q746N0_THET2, Q746N4_THET2	447	33	1772	1.08115	1	0.999492	99.9999
GOTERM_BP_FAT	GO:0009236~cobalamin biosynthetic process	9	1.09622	0.616298	Q746P0_THET2, Q72JA0_THET2, Q746P2_THET2, CBID_THET2, Q746N9_THET2, Q746P3_THET2, Q746Q1_THET2, Q746N0_THET2, Q746N4_THET2	447	33	1772	1.08115	1	0.999492	99.9999
GOTERM_MF_FAT	GO:0042242~cobyrinic acid a,c-diamide synthase activity	3	0.365408	0.697069	Q72JA0_THET2, Q746Q1_THET2, Q746N0_THET2	522	9	2095	1.3378	1	0.999984	100
GOTERM_MF_FAT	GO:0004359~glutaminase activity	3	0.365408	0.697069	Q72JA0_THET2, Q746Q1_THET2, Q746N0_THET2	522	9	2095	1.3378	1	0.999984	100
Annotation Cluster 61	Enrichment Score: 0.21278093639461876
Category	Term	Count	%	PValue	Genes	List Total	Pop Hits	Pop Total	Fold Enrichment	Bonferroni	Benjamini	FDR
GOTERM_MF_FAT	GO:0003684~damaged DNA binding	5	0.609013	0.220643	FPG_THET2, Q72L87_THET2, Q72I50_THET2, RECA_THET2, Q72KB4_THET2	522	10	2095	2.0067	1	0.995582	97.501
GOTERM_MF_FAT	GO:0043566~structure-specific DNA binding	4	0.487211	0.395636	Q72I50_THET2, MUTL_THET2, RECA_THET2, Q72GV7_THET2	522	9	2095	1.78374	1	0.999749	99.942
SP_PIR_KEYWORDS	dna repair	7	0.852619	0.601378	FPG_THET2, Q72L87_THET2, Q72I50_THET2, MUTL_THET2, RECA_THET2, Q72IQ7_THET2, RUVC_THET2	821	32	4254	1.13345	1	0.91796	99.9987
SP_PIR_KEYWORDS	DNA damage	7	0.852619	0.601378	FPG_THET2, Q72L87_THET2, Q72I50_THET2, MUTL_THET2, RECA_THET2, Q72IQ7_THET2, RUVC_THET2	821	32	4254	1.13345	1	0.91796	99.9987
GOTERM_BP_FAT	GO:0033554~cellular response to stress	16	1.94884	0.857855	Q72G97_THET2, Q72HD8_THET2, Q72L87_THET2, RPOA_THET2, MUTL_THET2, RECA_THET2, Q72KB4_THET2, Q72IQ7_THET2, RUVC_THET2, FPG_THET2, Q72JG9_THET2, Q72I50_THET2, Q72IS0_THET2, Q72ID3_THET2, Q72H92_THET2, Q72HF2_THET2	447	73	1772	0.868867	1	0.999963	100
GOTERM_BP_FAT	GO:0006974~response to DNA damage stimulus	15	1.82704	0.891111	Q72L87_THET2, Q72G97_THET2, RPOA_THET2, MUTL_THET2, RECA_THET2, Q72KB4_THET2, Q72IQ7_THET2, RUVC_THET2, FPG_THET2, Q72JG9_THET2, Q72I50_THET2, Q72IS0_THET2, Q72ID3_THET2, Q72H92_THET2, Q72HF2_THET2	447	71	1772	0.837508	1	0.999978	100
GOTERM_BP_FAT	GO:0006281~DNA repair	15	1.82704	0.891111	Q72L87_THET2, Q72G97_THET2, RPOA_THET2, MUTL_THET2, RECA_THET2, Q72KB4_THET2, Q72IQ7_THET2, RUVC_THET2, FPG_THET2, Q72JG9_THET2, Q72I50_THET2, Q72IS0_THET2, Q72ID3_THET2, Q72H92_THET2, Q72HF2_THET2	447	71	1772	0.837508	1	0.999978	100
GOTERM_BP_FAT	GO:0006259~DNA metabolic process	36	4.3849	0.922984	Q72GP2_THET2, Q72IZ1_THET2, RPOA_THET2, Q72J56_THET2, MUTL_THET2, RECA_THET2, Q72GR3_THET2, Q72GV7_THET2, Q746G3_THET2, RUVC_THET2, FPG_THET2, Q72JG9_THET2, Q72I50_THET2, Q72J83_THET2, Q72ID3_THET2, Q72H92_THET2, Q72GG7_THET2, Q72L57_THET2, Q72L87_THET2, Q72G97_THET2, Q72GB7_THET2, Q72KB4_THET2, Q72IQ7_THET2, Q72KK4_THET2, Q72HA7_THET2, Q745U7_THET2, Q72IS0_THET2, DNAJ_THET2, Q72KZ2_THET2, Q72IK7…	447	167	1772	0.854559	1	0.99999	100
Annotation Cluster 62	Enrichment Score: 0.2124771194443212
Category	Term	Count	%	PValue	Genes	List Total	Pop Hits	Pop Total	Fold Enrichment	Bonferroni	Benjamini	FDR
KEGG_PATHWAY	tth00790:Folate biosynthesis	4	0.487211	0.303659	Q72J06_THET2, Q72H55_THET2, Q72HU7_THET2, Q72GQ3_THET2	347	7	1244	2.04858	1	0.710863	98.4307
GOTERM_BP_FAT	GO:0009396~folic acid and derivative biosynthetic process	5	0.609013	0.70127	Q72J06_THET2, FTHS_THET2, Q72H55_THET2, Q72HU7_THET2, Q72GQ3_THET2	447	18	1772	1.10117	1	0.999803	100
GOTERM_BP_FAT	GO:0006760~folic acid and derivative metabolic process	5	0.609013	0.781452	Q72J06_THET2, FTHS_THET2, Q72H55_THET2, Q72HU7_THET2, Q72GQ3_THET2	447	20	1772	0.991051	1	0.999907	100
GOTERM_BP_FAT	GO:0009108~coenzyme biosynthetic process	15	1.82704	0.849021	Q72LK4_THET2, NADD_THET2, PANC_THET2, FTHS_THET2, Q72ID7_THET2, COMB_THET2, Q72HL9_THET2, Q72HU7_THET2, Q72GF4_THET2, LIPA_THET2, Q72J06_THET2, Q72H55_THET2, PDXT_THET2, Q72GQ3_THET2, LIPB_THET2	447	68	1772	0.874457	1	0.999958	100
Annotation Cluster 63	Enrichment Score: 0.18711682789004633
Category	Term	Count	%	PValue	Genes	List Total	Pop Hits	Pop Total	Fold Enrichment	Bonferroni	Benjamini	FDR
SP_PIR_KEYWORDS	cell inner membrane	8	0.974421	0.354033	SECA_THET2, COXX_THET2, UPPP_THET2, NUOK_THET2, NUOC_THET2, NUOD_THET2, PLSY_THET2, MURG_THET2	821	30	4254	1.38173	1	0.80853	99.5263
GOTERM_CC_FAT	GO:0044459~plasma membrane part	3	0.365408	0.88065	SECA_THET2, NUOC_THET2, NUOD_THET2	127	13	499	0.906723	1	0.99894	100
GOTERM_CC_FAT	GO:0009898~internal side of plasma membrane	3	0.365408	0.88065	SECA_THET2, NUOC_THET2, NUOD_THET2	127	13	499	0.906723	1	0.99894	100
Annotation Cluster 64	Enrichment Score: 0.18231923658769347
Category	Term	Count	%	PValue	Genes	List Total	Pop Hits	Pop Total	Fold Enrichment	Bonferroni	Benjamini	FDR
INTERPRO	IPR002085:Alcohol dehydrogenase superfamily, zinc-containing	4	0.487211	0.637452	Q72KT1_THET2, Q72IG9_THET2, Q72GL5_THET2, TDH_THET2	733	15	3493	1.27076	1	1	100
INTERPRO	IPR013154:Alcohol dehydrogenase GroES-like	4	0.487211	0.637452	Q72KT1_THET2, Q72IG9_THET2, Q72GL5_THET2, TDH_THET2	733	15	3493	1.27076	1	1	100
INTERPRO	IPR013149:Alcohol dehydrogenase, zinc-binding	4	0.487211	0.637452	Q72KT1_THET2, Q72IG9_THET2, Q72GL5_THET2, TDH_THET2	733	15	3493	1.27076	1	1	100
PIR_SUPERFAMILY	PIRSF000091:alcohol dehydrogenase	4	0.487211	0.720079	Q72KT1_THET2, Q72IG9_THET2, Q72GL5_THET2, TDH_THET2	505	15	2150	1.13531	1	1	100
Annotation Cluster 65	Enrichment Score: 0.16666073167685183
Category	Term	Count	%	PValue	Genes	List Total	Pop Hits	Pop Total	Fold Enrichment	Bonferroni	Benjamini	FDR
KEGG_PATHWAY	tth00340:Histidine metabolism	9	1.09622	0.164035	HISZ_THET2, Q72GU8_THET2, HISX_THET2, Q72K88_THET2, Q72LK7_THET2, Q72LJ9_THET2, Q72LF1_THET2, Q72KD3_THET2, HIS4_THET2	347	20	1244	1.61326	1	0.523548	87.2129
SP_PIR_KEYWORDS	Histidine biosynthesis	3	0.365408	0.783789	HISZ_THET2, HISX_THET2, HIS4_THET2	821	14	4254	1.11032	1	0.968595	100
GOTERM_BP_FAT	GO:0006547~histidine metabolic process	3	0.365408	0.939128	HISZ_THET2, HISX_THET2, HIS4_THET2	447	16	1772	0.743289	1	0.999995	100
GOTERM_BP_FAT	GO:0009076~histidine family amino acid biosynthetic process	3	0.365408	0.939128	HISZ_THET2, HISX_THET2, HIS4_THET2	447	16	1772	0.743289	1	0.999995	100
GOTERM_BP_FAT	GO:0009075~histidine family amino acid metabolic process	3	0.365408	0.939128	HISZ_THET2, HISX_THET2, HIS4_THET2	447	16	1772	0.743289	1	0.999995	100
GOTERM_BP_FAT	GO:0000105~histidine biosynthetic process	3	0.365408	0.939128	HISZ_THET2, HISX_THET2, HIS4_THET2	447	16	1772	0.743289	1	0.999995	100
Annotation Cluster 66	Enrichment Score: 0.16352157794402464
Category	Term	Count	%	PValue	Genes	List Total	Pop Hits	Pop Total	Fold Enrichment	Bonferroni	Benjamini	FDR
SP_PIR_KEYWORDS	iron-sulfur	11	1.33983	0.392316	Q72GD4_THET2, LIPA_THET2, LEUC_THET2, ISPH_THET2, Q72KM0_THET2, Q72GR2_THET2, Q72GD3_THET2, Q72HC7_THET2, Q72GN9_THET2, Q72HJ7_THET2, ILVD_THET2	821	46	4254	1.23905	1	0.835626	99.7758
SP_PIR_KEYWORDS	iron	14	1.70524	0.441861	ISPH_THET2, Q72KM0_THET2, Q72GD3_THET2, Q72HC7_THET2, Q72GN9_THET2, Q72HJ7_THET2, ILVD_THET2, HEMH_THET2, Q72GD4_THET2, LIPA_THET2, LEUC_THET2, Q746J6_THET2, DEF_THET2, Q72GR2_THET2	821	63	4254	1.15144	1	0.852582	99.9209
SP_PIR_KEYWORDS	4fe-4s	7	0.852619	0.633349	Q72GD4_THET2, LIPA_THET2, LEUC_THET2, Q72KM0_THET2, Q72GD3_THET2, Q72GN9_THET2, ILVD_THET2	821	33	4254	1.0991	1	0.929008	99.9995
GOTERM_MF_FAT	GO:0051536~iron-sulfur cluster binding	22	2.67966	0.85027	Q72KV4_THET2, Q72I60_THET2, ISPH_THET2, Q72GL4_THET2, Q72KM0_THET2, Q72GD3_THET2, Q72HC7_THET2, Q72HV8_THET2, Q72JM0_THET2, Q72I78_THET2, Q72GN9_THET2, Q72HJ7_THET2, Q72KN3_THET2, ILVD_THET2, Q72KR6_THET2, Q72IY0_THET2, Q72GD4_THET2, LIPA_THET2, LEUC_THET2, Q72GR2_THET2, Q72HF2_THET2, Q745U5_THET2	522	100	2095	0.88295	1	0.999999	100
GOTERM_MF_FAT	GO:0051540~metal cluster binding	22	2.67966	0.85027	Q72KV4_THET2, Q72I60_THET2, ISPH_THET2, Q72GL4_THET2, Q72KM0_THET2, Q72GD3_THET2, Q72HC7_THET2, Q72HV8_THET2, Q72JM0_THET2, Q72I78_THET2, Q72GN9_THET2, Q72HJ7_THET2, Q72KN3_THET2, ILVD_THET2, Q72KR6_THET2, Q72IY0_THET2, Q72GD4_THET2, LIPA_THET2, LEUC_THET2, Q72GR2_THET2, Q72HF2_THET2, Q745U5_THET2	522	100	2095	0.88295	1	0.999999	100
GOTERM_MF_FAT	GO:0051539~4 iron, 4 sulfur cluster binding	12	1.46163	0.91364	Q72GD4_THET2, Q72KV4_THET2, LIPA_THET2, LEUC_THET2, Q72KM0_THET2, Q72GR2_THET2, Q72GD3_THET2, Q72HF2_THET2, Q72GN9_THET2, Q72KN3_THET2, ILVD_THET2, Q72KR6_THET2	522	60	2095	0.802682	1	1	100
GOTERM_MF_FAT	GO:0005506~iron ion binding	19	2.31425	0.988314	Q72H24_THET2, ISPH_THET2, Q72KM0_THET2, Q72GD3_THET2, Q72HC7_THET2, Q72HV8_THET2, Q72GN9_THET2, Q72HJ7_THET2, ILVD_THET2, HEMH_THET2, Q72GD4_THET2, LIPA_THET2, Q72HC5_THET2, LEUC_THET2, Q746J6_THET2, DEF_THET2, Q72GR2_THET2, Q72KW6_THET2, Q72IU7_THET2	522	109	2095	0.699585	1	1	100
Annotation Cluster 67	Enrichment Score: 0.15223174074221688
Category	Term	Count	%	PValue	Genes	List Total	Pop Hits	Pop Total	Fold Enrichment	Bonferroni	Benjamini	FDR
PIR_SUPERFAMILY	PIRSF000182:acyl-CoA dehydrogenase	4	0.487211	0.495875	Q72KT2_THET2, Q72HC0_THET2, Q72L25_THET2, Q72HE1_THET2	505	11	2150	1.54815	1	1	99.9954
INTERPRO	IPR013786:Acyl-CoA dehydrogenase/oxidase, N-terminal	4	0.487211	0.533398	Q72KT2_THET2, Q72HC0_THET2, Q72L25_THET2, Q72HE1_THET2	733	13	3493	1.46626	1	1	99.9996
INTERPRO	IPR006092:Acyl-CoA dehydrogenase, N-terminal	4	0.487211	0.533398	Q72KT2_THET2, Q72HC0_THET2, Q72L25_THET2, Q72HE1_THET2	733	13	3493	1.46626	1	1	99.9996
INTERPRO	IPR006089:Acyl-CoA dehydrogenase, conserved site	4	0.487211	0.587531	Q72KT2_THET2, Q72HC0_THET2, Q72L25_THET2, Q72HE1_THET2	733	14	3493	1.36153	1	1	100
INTERPRO	IPR006090:Acyl-CoA oxidase/dehydrogenase, type 1	4	0.487211	0.637452	Q72KT2_THET2, Q72HC0_THET2, Q72L25_THET2, Q72HE1_THET2	733	15	3493	1.27076	1	1	100
COG_ONTOLOGY	Lipid metabolism	7	0.852619	0.729139	Q72KT2_THET2, Q72HC0_THET2, ISPE_THET2, Q72IE0_THET2, Q72L25_THET2, Q72GU9_THET2, Q72HE1_THET2	140	36	718	0.997222	1	0.989658	99.9982
INTERPRO	IPR013764:Acyl-CoA oxidase/dehydrogenase, type1/2, C-terminal	4	0.487211	0.760935	Q72KT2_THET2, Q72HC0_THET2, Q72L25_THET2, Q72HE1_THET2	733	18	3493	1.05897	1	1	100
INTERPRO	IPR006091:Acyl-CoA oxidase/dehydrogenase, central region	4	0.487211	0.760935	Q72KT2_THET2, Q72HC0_THET2, Q72L25_THET2, Q72HE1_THET2	733	18	3493	1.05897	1	1	100
SP_PIR_KEYWORDS	FAD	7	0.852619	0.768732	Q72KT2_THET2, Q72HD8_THET2, Q72JI3_THET2, Q72HC0_THET2, TRMFO_THET2, Q72L25_THET2, Q72HE1_THET2	821	38	4254	0.954484	1	0.966523	100
KEGG_PATHWAY	tth00071:Fatty acid metabolism	5	0.609013	0.819773	Q72KT2_THET2, Q72HC0_THET2, Q72KD3_THET2, Q72L72_THET2, Q72L25_THET2	347	19	1244	0.943425	1	0.977804	100
GOTERM_MF_FAT	GO:0003995~acyl-CoA dehydrogenase activity	4	0.487211	0.863097	Q72KT2_THET2, Q72HC0_THET2, Q72L25_THET2, Q72HE1_THET2	522	18	2095	0.891869	1	1	100
SP_PIR_KEYWORDS	Flavoprotein	7	0.852619	0.890564	Q72KT2_THET2, Q72HD8_THET2, Q72JI3_THET2, Q72HC0_THET2, TRMFO_THET2, Q72L25_THET2, Q72HE1_THET2	821	45	4254	0.806009	1	0.990856	100
GOTERM_MF_FAT	GO:0050660~FAD binding	10	1.21803	0.971261	Q72KT2_THET2, Q72HD8_THET2, Q72JI3_THET2, Q72KK5_THET2, Q72HC0_THET2, TRMFO_THET2, Q72JC6_THET2, Q72HK3_THET2, Q72L25_THET2, Q72HE1_THET2	522	58	2095	0.691967	1	1	100
Annotation Cluster 68	Enrichment Score: 0.1440542244691256
Category	Term	Count	%	PValue	Genes	List Total	Pop Hits	Pop Total	Fold Enrichment	Bonferroni	Benjamini	FDR
SP_PIR_KEYWORDS	arginine biosynthesis	4	0.487211	0.57465	CARB_THET2, ARGJ_THET2, ARGC_THET2, CARA_THET2	821	15	4254	1.38173	1	0.909198	99.9972
GOTERM_BP_FAT	GO:0009084~glutamine family amino acid biosynthetic process	8	0.974421	0.697858	P5CR_THET2, CARB_THET2, ARGJ_THET2, ARGC_THET2, CARA_THET2, Q72IM8_THET2, PROB_THET2, PROA_THET2	447	31	1772	1.02302	1	0.999826	100
GOTERM_BP_FAT	GO:0006525~arginine metabolic process	6	0.730816	0.761003	CARB_THET2, ARGJ_THET2, ARGC_THET2, CARA_THET2, Q72I55_THET2, Q72K94_THET2	447	24	1772	0.991051	1	0.999867	100
GOTERM_BP_FAT	GO:0006526~arginine biosynthetic process	4	0.487211	0.869414	CARB_THET2, ARGJ_THET2, ARGC_THET2, CARA_THET2	447	18	1772	0.880935	1	0.999966	100
Annotation Cluster 69	Enrichment Score: 0.13951073126792868
Category	Term	Count	%	PValue	Genes	List Total	Pop Hits	Pop Total	Fold Enrichment	Bonferroni	Benjamini	FDR
GOTERM_MF_FAT	GO:0004494~methylmalonyl-CoA mutase activity	3	0.365408	0.463085	Q72J97_THET2, Q72JU2_THET2, Q72JU1_THET2	522	6	2095	2.0067	1	0.999879	99.9899
GOTERM_MF_FAT	GO:0031419~cobalamin binding	3	0.365408	0.839945	Q72J97_THET2, Q72JU2_THET2, Q72JU1_THET2	522	12	2095	1.00335	1	0.999999	100
GOTERM_MF_FAT	GO:0046906~tetrapyrrole binding	8	0.974421	0.980746	Q72H24_THET2, Q72HC5_THET2, Q72J97_THET2, Q746J6_THET2, Q72KM0_THET2, Q72IU7_THET2, Q72JU2_THET2, Q72JU1_THET2	522	50	2095	0.642146	1	1	100
Annotation Cluster 70	Enrichment Score: 0.12769949325963703
Category	Term	Count	%	PValue	Genes	List Total	Pop Hits	Pop Total	Fold Enrichment	Bonferroni	Benjamini	FDR
GOTERM_BP_FAT	GO:0045333~cellular respiration	11	1.33983	0.497543	MDH_THET2, Q72H24_THET2, Q72GE0_THET2, Q72GZ6_THET2, Q72GD4_THET2, Q72GE1_THET2, Q72GD9_THET2, Q72L91_THET2, NUOK_THET2, Q72HC8_THET2, CAPP_THET2	447	38	1772	1.14753	1	0.998655	99.996
GOTERM_BP_FAT	GO:0015980~energy derivation by oxidation of organic compounds	12	1.46163	0.569313	MDH_THET2, Q72H24_THET2, Q72GE0_THET2, Q72GZ6_THET2, GPDA_THET2, Q72GD4_THET2, Q72GE1_THET2, Q72GD9_THET2, Q72L91_THET2, NUOK_THET2, Q72HC8_THET2, CAPP_THET2	447	44	1772	1.08115	1	0.999369	99.9996
SP_PIR_KEYWORDS	tricarboxylic acid cycle	3	0.365408	0.704433	MDH_THET2, Q72L91_THET2, CAPP_THET2	821	12	4254	1.29537	1	0.949565	100
GOTERM_BP_FAT	GO:0009109~coenzyme catabolic process	5	0.609013	0.781452	MDH_THET2, Q72GZ6_THET2, Q72L91_THET2, CAPP_THET2, Q72ID7_THET2	447	20	1772	0.991051	1	0.999907	100
GOTERM_BP_FAT	GO:0051187~cofactor catabolic process	5	0.609013	0.781452	MDH_THET2, Q72GZ6_THET2, Q72L91_THET2, CAPP_THET2, Q72ID7_THET2	447	20	1772	0.991051	1	0.999907	100
GOTERM_BP_FAT	GO:0009060~aerobic respiration	5	0.609013	0.843563	MDH_THET2, Q72H24_THET2, Q72GZ6_THET2, Q72L91_THET2, CAPP_THET2	447	22	1772	0.900956	1	0.999961	100
GOTERM_BP_FAT	GO:0046356~acetyl-CoA catabolic process	4	0.487211	0.869414	MDH_THET2, Q72GZ6_THET2, Q72L91_THET2, CAPP_THET2	447	18	1772	0.880935	1	0.999966	100
GOTERM_BP_FAT	GO:0006099~tricarboxylic acid cycle	4	0.487211	0.869414	MDH_THET2, Q72GZ6_THET2, Q72L91_THET2, CAPP_THET2	447	18	1772	0.880935	1	0.999966	100
GOTERM_BP_FAT	GO:0006084~acetyl-CoA metabolic process	4	0.487211	0.912659	MDH_THET2, Q72GZ6_THET2, Q72L91_THET2, CAPP_THET2	447	20	1772	0.792841	1	0.999987	100
Annotation Cluster 71	Enrichment Score: 0.12401374871285105
Category	Term	Count	%	PValue	Genes	List Total	Pop Hits	Pop Total	Fold Enrichment	Bonferroni	Benjamini	FDR
GOTERM_BP_FAT	GO:0008654~phospholipid biosynthetic process	4	0.487211	0.724752	GPDA_THET2, ISPH_THET2, Q72LG9_THET2, FABZ_THET2	447	14	1772	1.13263	1	0.999832	100
GOTERM_BP_FAT	GO:0006644~phospholipid metabolic process	4	0.487211	0.724752	GPDA_THET2, ISPH_THET2, Q72LG9_THET2, FABZ_THET2	447	14	1772	1.13263	1	0.999832	100
GOTERM_BP_FAT	GO:0019637~organophosphate metabolic process	4	0.487211	0.808313	GPDA_THET2, ISPH_THET2, Q72LG9_THET2, FABZ_THET2	447	16	1772	0.991051	1	0.999931	100
Annotation Cluster 72	Enrichment Score: 0.11584592845953841
Category	Term	Count	%	PValue	Genes	List Total	Pop Hits	Pop Total	Fold Enrichment	Bonferroni	Benjamini	FDR
KEGG_PATHWAY	tth00900:Terpenoid backbone biosynthesis	5	0.609013	0.439388	ISPE_THET2, ISPH_THET2, DXS_THET2, ISPD_THET2, Q72L72_THET2	347	12	1244	1.49376	1	0.816187	99.8697
SP_PIR_KEYWORDS	Isoprene biosynthesis	4	0.487211	0.664175	ISPE_THET2, ISPH_THET2, DXS_THET2, ISPD_THET2	821	17	4254	1.21917	1	0.938708	99.9998
GOTERM_BP_FAT	GO:0016114~terpenoid biosynthetic process	4	0.487211	0.808313	ISPE_THET2, ISPH_THET2, DXS_THET2, ISPD_THET2	447	16	1772	0.991051	1	0.999931	100
GOTERM_BP_FAT	GO:0006721~terpenoid metabolic process	4	0.487211	0.808313	ISPE_THET2, ISPH_THET2, DXS_THET2, ISPD_THET2	447	16	1772	0.991051	1	0.999931	100
GOTERM_BP_FAT	GO:0019748~secondary metabolic process	7	0.852619	0.874714	TPIS_THET2, NADD_THET2, ISPE_THET2, ISPH_THET2, DXS_THET2, ISPD_THET2, Q72GU9_THET2	447	33	1772	0.840892	1	0.99997	100
GOTERM_BP_FAT	GO:0006720~isoprenoid metabolic process	4	0.487211	0.962633	ISPE_THET2, ISPH_THET2, DXS_THET2, ISPD_THET2	447	24	1772	0.660701	1	0.999999	100
GOTERM_BP_FAT	GO:0008299~isoprenoid biosynthetic process	4	0.487211	0.962633	ISPE_THET2, ISPH_THET2, DXS_THET2, ISPD_THET2	447	24	1772	0.660701	1	0.999999	100
Annotation Cluster 73	Enrichment Score: 0.10205500931743465
Category	Term	Count	%	PValue	Genes	List Total	Pop Hits	Pop Total	Fold Enrichment	Bonferroni	Benjamini	FDR
INTERPRO	IPR000836:Phosphoribosyltransferase	5	0.609013	0.670285	PYRE_THET2, Q72IE8_THET2, Q72I82_THET2, Q72I83_THET2, Q72IH6_THET2	733	21	3493	1.13461	1	1	100
GOTERM_BP_FAT	GO:0009116~nucleoside metabolic process	12	1.46163	0.818185	PYRE_THET2, NDK_THET2, Q72IE8_THET2, TGT_THET2, Q72I82_THET2, Q72HS4_THET2, Q72L73_THET2, Q72I83_THET2, Q72HX7_THET2, Q72IE7_THET2, Q72ID7_THET2, Q72IH6_THET2	447	53	1772	0.897556	1	0.999939	100
GOTERM_MF_FAT	GO:0016763~transferase activity, transferring pentosyl groups	6	0.730816	0.900998	PYRE_THET2, TGT_THET2, Q72I82_THET2, Q72HS4_THET2, Q72I83_THET2, Q72IH6_THET2	522	30	2095	0.802682	1	1	100
Annotation Cluster 74	Enrichment Score: 0.10140105638992555
Category	Term	Count	%	PValue	Genes	List Total	Pop Hits	Pop Total	Fold Enrichment	Bonferroni	Benjamini	FDR
SP_PIR_KEYWORDS	Transcription	17	2.07065	0.413196	NUSB_THET2, RPOZ_THET2, Q72KG4_THET2, RPOA_THET2, RPOB_THET2, Q745Z1_THET2, Q72IY7_THET2, RPOC_THET2, Q72J83_THET2, Q72IB7_THET2, Q72L24_THET2, Q72GP8_THET2, Q72K09_THET2, REX_THET2, Q72ID0_THET2, Q72IR0_THET2, Q72GM9_THET2, Q72GW1_THET2	821	77	4254	1.14396	1	0.843557	99.8539
SP_PIR_KEYWORDS	dna-binding	21	2.55786	0.601231	Q72L87_THET2, Q72GB7_THET2, Q745Z1_THET2, RECA_THET2, Q72GV7_THET2, Q72IQ7_THET2, Q72IY7_THET2, Q72LH3_THET2, FPG_THET2, Q72H56_THET2, Q72I50_THET2, Q72GW8_THET2, Q72IS0_THET2, Q72IB7_THET2, Q72GP8_THET2, Q72L24_THET2, Q72LC7_THET2, Q72K09_THET2, REX_THET2, Q72ID0_THET2, Q72IR0_THET2, Q72GM9_THET2	821	107	4254	1.01693	1	0.921072	99.9987
GOTERM_MF_FAT	GO:0003700~transcription factor activity	18	2.19245	0.737635	Q72KG4_THET2, SYN_THET2, Q72JH4_THET2, Q745Z1_THET2, Q72KB4_THET2, Q72IY7_THET2, Q72H56_THET2, Q72GN0_THET2, Q72GW8_THET2, Q72IB7_THET2, Q72L24_THET2, Q72GP8_THET2, Q72LC7_THET2, Q72K09_THET2, REX_THET2, Q72ID0_THET2, Q72KW6_THET2, Q72IR0_THET2, Q72GM9_THET2	522	76	2095	0.950544	1	0.999991	100
SP_PIR_KEYWORDS	transcription regulation	12	1.46163	0.803423	NUSB_THET2, Q72KG4_THET2, Q72L24_THET2, Q72IB7_THET2, Q72GP8_THET2, Q72K09_THET2, Q745Z1_THET2, REX_THET2, Q72ID0_THET2, Q72IR0_THET2, Q72GM9_THET2, Q72IY7_THET2, Q72GW1_THET2	821	69	4254	0.901128	1	0.972204	100
GOTERM_BP_FAT	GO:0006350~transcription	17	2.07065	0.866089	NUSB_THET2, RPOZ_THET2, Q72KG4_THET2, RPOA_THET2, RPOB_THET2, Q745Z1_THET2, Q72IY7_THET2, RPOC_THET2, Q72J83_THET2, Q72IB7_THET2, Q72L24_THET2, Q72GP8_THET2, Q72K09_THET2, REX_THET2, Q72ID0_THET2, Q72IR0_THET2, Q72GM9_THET2, Q72GW1_THET2	447	78	1772	0.863994	1	0.999964	100
GOTERM_MF_FAT	GO:0030528~transcription regulator activity	23	2.80146	0.926181	NUSB_THET2, Q72KG4_THET2, SYN_THET2, Q72JH4_THET2, Q745Z1_THET2, Q72KB4_THET2, Q72G70_THET2, Q72IY7_THET2, Q72H56_THET2, Q72JY5_THET2, Q72GN0_THET2, Q72GW8_THET2, Q72IB7_THET2, Q72GP8_THET2, Q72L24_THET2, Q72LC7_THET2, Q72K09_THET2, REX_THET2, Q72GJ8_THET2, Q72ID0_THET2, Q72KW6_THET2, Q72GJ9_THET2, Q72IR0_THET2, Q72GM9_THET2, Q72GW1_THET2	522	112	2095	0.824182	1	1	100
GOTERM_BP_FAT	GO:0006355~regulation of transcription, DNA-dependent	29	3.53228	0.926222	Q72G70_THET2, Q72JY5_THET2, Q72GN0_THET2, Q72GW8_THET2, Q72GA0_THET2, Q72L24_THET2, Q72K09_THET2, NPD_THET2, Q72GJ8_THET2, Q72ID0_THET2, Q72GJ9_THET2, Q72IR0_THET2, Q72H69_THET2, Q72JJ4_THET2, NUSB_THET2, Q72KG4_THET2, SYN_THET2, Q72JH4_THET2, Q745Z1_THET2, Q72KB4_THET2, Q72IY7_THET2, Q72H56_THET2, Q72IB7_THET2, Q72GP8_THET2, Q72LC7_THET2, REX_THET2, Q72KW6_THET2, Q72L86_THET2, Q72KE6_THET2, Q72G…	447	137	1772	0.839138	1	0.999991	100
GOTERM_BP_FAT	GO:0051252~regulation of RNA metabolic process	29	3.53228	0.938905	Q72G70_THET2, Q72JY5_THET2, Q72GN0_THET2, Q72GW8_THET2, Q72GA0_THET2, Q72L24_THET2, Q72K09_THET2, NPD_THET2, Q72GJ8_THET2, Q72ID0_THET2, Q72GJ9_THET2, Q72IR0_THET2, Q72H69_THET2, Q72JJ4_THET2, NUSB_THET2, Q72KG4_THET2, SYN_THET2, Q72JH4_THET2, Q745Z1_THET2, Q72KB4_THET2, Q72IY7_THET2, Q72H56_THET2, Q72IB7_THET2, Q72GP8_THET2, Q72LC7_THET2, REX_THET2, Q72KW6_THET2, Q72L86_THET2, Q72KE6_THET2, Q72G…	447	139	1772	0.827065	1	0.999996	100
GOTERM_BP_FAT	GO:0045449~regulation of transcription	29	3.53228	0.962888	Q72G70_THET2, Q72JY5_THET2, Q72GN0_THET2, Q72GW8_THET2, Q72GA0_THET2, Q72L24_THET2, Q72K09_THET2, NPD_THET2, Q72GJ8_THET2, Q72ID0_THET2, Q72GJ9_THET2, Q72IR0_THET2, Q72H69_THET2, Q72JJ4_THET2, NUSB_THET2, Q72KG4_THET2, SYN_THET2, Q72JH4_THET2, Q745Z1_THET2, Q72KB4_THET2, Q72IY7_THET2, Q72H56_THET2, Q72IB7_THET2, Q72GP8_THET2, Q72LC7_THET2, REX_THET2, Q72KW6_THET2, Q72L86_THET2, Q72KE6_THET2, Q72G…	447	144	1772	0.798347	1	0.999999	100
GOTERM_MF_FAT	GO:0003677~DNA binding	54	6.57734	0.97912	Q72GP2_THET2, MUTL_THET2, Q72GR3_THET2, Q72GV7_THET2, RECA_THET2, Q72LH3_THET2, FPG_THET2, Q72GN0_THET2, Q72J83_THET2, Q72GW8_THET2, Q72L24_THET2, Q72K09_THET2, Q72H92_THET2, Q72GJ8_THET2, Q72H69_THET2, Q72IR0_THET2, Q72GB7_THET2, RPOB_THET2, Q72JH4_THET2, Q745Z1_THET2, Q72KK4_THET2, Q72IB7_THET2, Q72KZ2_THET2, Q72KW6_THET2, Q72IZ1_THET2, RPOZ_THET2, RPOA_THET2, Q746G3_THET2, Q72G70_THET2, RPOC_T…	522	264	2095	0.820925	1	1	100
Annotation Cluster 75	Enrichment Score: 0.09499625187578471
Category	Term	Count	%	PValue	Genes	List Total	Pop Hits	Pop Total	Fold Enrichment	Bonferroni	Benjamini	FDR
SMART	SM00228:PDZ	3	0.365408	0.607424	Q72J25_THET2, Q72J50_THET2, Q72KS5_THET2	108	10	552	1.53333	1	0.999966	99.993
INTERPRO	IPR001478:PDZ/DHR/GLGF	3	0.365408	0.652737	Q72J25_THET2, Q72J50_THET2, Q72KS5_THET2	733	10	3493	1.4296	1	1	100
GOTERM_MF_FAT	GO:0017171~serine hydrolase activity	6	0.730816	0.862913	Q72GA0_THET2, Q72IX8_THET2, Q72J25_THET2, Q72J50_THET2, Q72KS5_THET2, CLPP_THET2	522	28	2095	0.860016	1	1	100
GOTERM_MF_FAT	GO:0008236~serine-type peptidase activity	6	0.730816	0.862913	Q72GA0_THET2, Q72IX8_THET2, Q72J25_THET2, Q72J50_THET2, Q72KS5_THET2, CLPP_THET2	522	28	2095	0.860016	1	1	100
GOTERM_MF_FAT	GO:0004252~serine-type endopeptidase activity	4	0.487211	0.938691	Q72GA0_THET2, Q72J25_THET2, Q72KS5_THET2, CLPP_THET2	522	22	2095	0.729711	1	1	100
GOTERM_MF_FAT	GO:0004175~endopeptidase activity	10	1.21803	0.971261	Q72IK4_THET2, Q72HS5_THET2, Q72GA0_THET2, Q72G85_THET2, Q72IG4_THET2, Q72HI6_THET2, Q72J25_THET2, Q72LM3_THET2, Q72J79_THET2, Q72KS5_THET2, CLPP_THET2	522	58	2095	0.691967	1	1	100
Annotation Cluster 76	Enrichment Score: 0.09126716373738412
Category	Term	Count	%	PValue	Genes	List Total	Pop Hits	Pop Total	Fold Enrichment	Bonferroni	Benjamini	FDR
INTERPRO	IPR006674:Metal-dependent phosphohydrolase, HD region, subdomain	5	0.609013	0.670285	Q72JY5_THET2, Q746F3_THET2, Q72HX7_THET2, Q72LL5_THET2, Q72HR6_THET2	733	21	3493	1.13461	1	1	100
SMART	SM00471:HDc	4	0.487211	0.87655	Q72JY5_THET2, Q72HX7_THET2, Q72LL5_THET2, Q72HR6_THET2	108	24	552	0.851852	1	1	100
INTERPRO	IPR003607:Metal-dependent phosphohydrolase, HD region	4	0.487211	0.90607	Q72JY5_THET2, Q72HX7_THET2, Q72LL5_THET2, Q72HR6_THET2	733	24	3493	0.794225	1	1	100
Annotation Cluster 77	Enrichment Score: 0.09047771787511313
Category	Term	Count	%	PValue	Genes	List Total	Pop Hits	Pop Total	Fold Enrichment	Bonferroni	Benjamini	FDR
GOTERM_BP_FAT	GO:0008295~spermidine biosynthetic process	3	0.365408	0.637657	SPEE_THET2, Q72I55_THET2, Q72K54_THET2	447	8	1772	1.48658	1	0.999601	100
GOTERM_BP_FAT	GO:0008216~spermidine metabolic process	3	0.365408	0.704393	SPEE_THET2, Q72I55_THET2, Q72K54_THET2	447	9	1772	1.3214	1	0.999797	100
GOTERM_BP_FAT	GO:0006596~polyamine biosynthetic process	3	0.365408	0.760564	SPEE_THET2, Q72I55_THET2, Q72K54_THET2	447	10	1772	1.18926	1	0.999877	100
GOTERM_BP_FAT	GO:0006595~polyamine metabolic process	3	0.365408	0.807249	SPEE_THET2, Q72I55_THET2, Q72K54_THET2	447	11	1772	1.08115	1	0.999935	100
GOTERM_BP_FAT	GO:0042398~cellular amino acid derivative biosynthetic process	5	0.609013	0.890126	PANC_THET2, SPEE_THET2, Q72GB9_THET2, Q72I55_THET2, Q72K54_THET2	447	24	1772	0.825876	1	0.999979	100
GOTERM_BP_FAT	GO:0006575~cellular amino acid derivative metabolic process	6	0.730816	0.907525	PANC_THET2, SPEE_THET2, Q72GB9_THET2, Q72ID7_THET2, Q72I55_THET2, Q72K54_THET2	447	30	1772	0.792841	1	0.999986	100
GOTERM_BP_FAT	GO:0042401~biogenic amine biosynthetic process	4	0.487211	0.912659	SPEE_THET2, Q72GB9_THET2, Q72I55_THET2, Q72K54_THET2	447	20	1772	0.792841	1	0.999987	100
GOTERM_BP_FAT	GO:0006576~biogenic amine metabolic process	4	0.487211	0.928997	SPEE_THET2, Q72GB9_THET2, Q72I55_THET2, Q72K54_THET2	447	21	1772	0.755087	1	0.999992	100
Annotation Cluster 78	Enrichment Score: 0.08642203023911557
Category	Term	Count	%	PValue	Genes	List Total	Pop Hits	Pop Total	Fold Enrichment	Bonferroni	Benjamini	FDR
GOTERM_MF_FAT	GO:0015036~disulfide oxidoreductase activity	4	0.487211	0.605797	Q72K56_THET2, Q72LJ2_THET2, Q72IL5_THET2, Q72L19_THET2	522	12	2095	1.3378	1	0.999967	99.9999
GOTERM_MF_FAT	GO:0015035~protein disulfide oxidoreductase activity	4	0.487211	0.605797	Q72K56_THET2, Q72LJ2_THET2, Q72IL5_THET2, Q72L19_THET2	522	12	2095	1.3378	1	0.999967	99.9999
GOTERM_MF_FAT	GO:0016667~oxidoreductase activity, acting on sulfur group of donors	6	0.730816	0.750183	Q72HD8_THET2, Q72KL2_THET2, Q72K56_THET2, Q72LJ2_THET2, Q72IL5_THET2, Q72L19_THET2	522	24	2095	1.00335	1	0.999992	100
INTERPRO	IPR012335:Thioredoxin fold	6	0.730816	0.885968	Q72K56_THET2, Q72IU5_THET2, Q72JZ6_THET2, Q72IL5_THET2, Q72GD2_THET2, Q72L19_THET2	733	35	3493	0.816917	1	1	100
INTERPRO	IPR017936:Thioredoxin-like	4	0.487211	0.90607	Q72K56_THET2, Q72IU5_THET2, Q72IL5_THET2, Q72L19_THET2	733	24	3493	0.794225	1	1	100
GOTERM_BP_FAT	GO:0045454~cell redox homeostasis	6	0.730816	0.954568	Q72JI3_THET2, Q72K56_THET2, Q72IU5_THET2, Q72HK3_THET2, Q72IL5_THET2, Q72L19_THET2	447	34	1772	0.699566	1	0.999998	100
GOTERM_BP_FAT	GO:0019725~cellular homeostasis	6	0.730816	0.978751	Q72JI3_THET2, Q72K56_THET2, Q72IU5_THET2, Q72HK3_THET2, Q72IL5_THET2, Q72L19_THET2	447	38	1772	0.625927	1	1	100
GOTERM_BP_FAT	GO:0042592~homeostatic process	6	0.730816	0.985697	Q72JI3_THET2, Q72K56_THET2, Q72IU5_THET2, Q72HK3_THET2, Q72IL5_THET2, Q72L19_THET2	447	40	1772	0.594631	1	1	100
Annotation Cluster 79	Enrichment Score: 0.08600648405867267
Category	Term	Count	%	PValue	Genes	List Total	Pop Hits	Pop Total	Fold Enrichment	Bonferroni	Benjamini	FDR
KEGG_PATHWAY	tth00400:Phenylalanine, tyrosine and tryptophan biosynthesis	8	0.974421	0.361464	Q72KD2_THET2, AROA_THET2, Q72IW1_THET2, Q72GB9_THET2, Q72LJ9_THET2, AROC_THET2, Q72LN8_THET2, Q72KC8_THET2	347	21	1244	1.36572	1	0.757453	99.4197
GOTERM_BP_FAT	GO:0043648~dicarboxylic acid metabolic process	8	0.974421	0.860751	MDH_THET2, AROA_THET2, Q72IW1_THET2, Q72GB9_THET2, AK_THET2, AROC_THET2, Q72LB5_THET2, Q72LN8_THET2	447	37	1772	0.857126	1	0.999964	100
SP_PIR_KEYWORDS	aromatic amino acid biosynthesis	3	0.365408	0.920748	AROA_THET2, Q72GB9_THET2, AROC_THET2	821	20	4254	0.777223	1	0.994759	100
GOTERM_BP_FAT	GO:0046417~chorismate metabolic process	5	0.609013	0.957581	AROA_THET2, Q72IW1_THET2, Q72GB9_THET2, AROC_THET2, Q72LN8_THET2	447	29	1772	0.683484	1	0.999998	100
GOTERM_BP_FAT	GO:0009073~aromatic amino acid family biosynthetic process	5	0.609013	0.957581	AROA_THET2, Q72IW1_THET2, Q72GB9_THET2, AROC_THET2, Q72LN8_THET2	447	29	1772	0.683484	1	0.999998	100
GOTERM_BP_FAT	GO:0009072~aromatic amino acid family metabolic process	5	0.609013	0.957581	AROA_THET2, Q72IW1_THET2, Q72GB9_THET2, AROC_THET2, Q72LN8_THET2	447	29	1772	0.683484	1	0.999998	100
GOTERM_BP_FAT	GO:0019438~aromatic compound biosynthetic process	9	1.09622	0.993903	Q72GF4_THET2, AROA_THET2, Q72IW1_THET2, Q72GB9_THET2, AROC_THET2, THII_THET2, DXS_THET2, Q72LN8_THET2, Q72HL9_THET2	447	61	1772	0.584883	1	1	100
Annotation Cluster 80	Enrichment Score: 0.07805267749352525
Category	Term	Count	%	PValue	Genes	List Total	Pop Hits	Pop Total	Fold Enrichment	Bonferroni	Benjamini	FDR
SP_PIR_KEYWORDS	methylation	4	0.487211	0.703475	Q72GL2_THET2, Q72GL0_THET2, Q72GK6_THET2, RL3_THET2	821	18	4254	1.15144	1	0.951281	100
INTERPRO	IPR001120:Prokaryotic N-terminal methylation site	3	0.365408	0.87885	Q72GL2_THET2, Q72GL0_THET2, Q72GK6_THET2	733	16	3493	0.893503	1	1	100
INTERPRO	IPR012902:Prepilin-type cleavage/methylation, N-terminal	3	0.365408	0.943363	Q72GL2_THET2, Q72GL0_THET2, Q72GK6_THET2	733	20	3493	0.714802	1	1	100
Annotation Cluster 81	Enrichment Score: 0.0749889551848533
Category	Term	Count	%	PValue	Genes	List Total	Pop Hits	Pop Total	Fold Enrichment	Bonferroni	Benjamini	FDR
GOTERM_BP_FAT	GO:0046165~alcohol biosynthetic process	4	0.487211	0.808313	TPIS_THET2, GPDA_THET2, Q72KV4_THET2, MURG_THET2	447	16	1772	0.991051	1	0.999931	100
GOTERM_BP_FAT	GO:0034637~cellular carbohydrate biosynthetic process	8	0.974421	0.816726	Q72K29_THET2, TPIS_THET2, GPDA_THET2, Q72KV4_THET2, Q72KZ1_THET2, MURG_THET2, FABZ_THET2, Q72K30_THET2	447	35	1772	0.906104	1	0.999942	100
GOTERM_BP_FAT	GO:0046364~monosaccharide biosynthetic process	3	0.365408	0.902354	TPIS_THET2, Q72KV4_THET2, MURG_THET2	447	14	1772	0.849473	1	0.999983	100
Annotation Cluster 82	Enrichment Score: 0.07179692009011357
Category	Term	Count	%	PValue	Genes	List Total	Pop Hits	Pop Total	Fold Enrichment	Bonferroni	Benjamini	FDR
GOTERM_MF_FAT	GO:0016407~acetyltransferase activity	8	0.974421	0.749868	ARGJ_THET2, Q72GY5_THET2, Q72L72_THET2, Q72KC8_THET2, Q72JD0_THET2, Q72GH3_THET2, Q72G93_THET2, Q72GU4_THET2	522	33	2095	0.972948	1	0.999993	100
INTERPRO	IPR016181:Acyl-CoA N-acyltransferase	5	0.609013	0.772758	Q72JN2_THET2, Q72GY5_THET2, Q72KC8_THET2, Q72JD0_THET2, Q72G93_THET2	733	24	3493	0.992781	1	1	100
INTERPRO	IPR000182:GCN5-related N-acetyltransferase	4	0.487211	0.870145	Q72GY5_THET2, Q72KC8_THET2, Q72JD0_THET2, Q72G93_THET2	733	22	3493	0.866427	1	1	100
GOTERM_MF_FAT	GO:0008080~N-acetyltransferase activity	5	0.609013	0.918911	ARGJ_THET2, Q72GY5_THET2, Q72KC8_THET2, Q72JD0_THET2, Q72G93_THET2	522	26	2095	0.77181	1	1	100
GOTERM_MF_FAT	GO:0016410~N-acyltransferase activity	5	0.609013	0.944326	ARGJ_THET2, Q72GY5_THET2, Q72KC8_THET2, Q72JD0_THET2, Q72G93_THET2	522	28	2095	0.71668	1	1	100
Annotation Cluster 83	Enrichment Score: 0.06367095668661878
Category	Term	Count	%	PValue	Genes	List Total	Pop Hits	Pop Total	Fold Enrichment	Bonferroni	Benjamini	FDR
SP_PIR_KEYWORDS	Aminopeptidase	3	0.365408	0.74677	Q72HM9_THET2, Q72I26_THET2, Q72JI4_THET2	821	13	4254	1.19573	1	0.963818	100
GOTERM_MF_FAT	GO:0004177~aminopeptidase activity	3	0.365408	0.91892	Q72HM9_THET2, Q72I26_THET2, Q72JI4_THET2	522	15	2095	0.802682	1	1	100
GOTERM_MF_FAT	GO:0008238~exopeptidase activity	4	0.487211	0.938691	Q72GY3_THET2, Q72HM9_THET2, Q72I26_THET2, Q72JI4_THET2	522	22	2095	0.729711	1	1	100
Annotation Cluster 84	Enrichment Score: 0.05457761760414175
Category	Term	Count	%	PValue	Genes	List Total	Pop Hits	Pop Total	Fold Enrichment	Bonferroni	Benjamini	FDR
SP_PIR_KEYWORDS	heme	3	0.365408	0.704433	Q72H24_THET2, Q746J6_THET2, Q72KM0_THET2	821	12	4254	1.29537	1	0.949565	100
GOTERM_MF_FAT	GO:0046906~tetrapyrrole binding	8	0.974421	0.980746	Q72H24_THET2, Q72HC5_THET2, Q72J97_THET2, Q746J6_THET2, Q72KM0_THET2, Q72IU7_THET2, Q72JU2_THET2, Q72JU1_THET2	522	50	2095	0.642146	1	1	100
GOTERM_MF_FAT	GO:0020037~heme binding	5	0.609013	0.992822	Q72H24_THET2, Q72HC5_THET2, Q746J6_THET2, Q72KM0_THET2, Q72IU7_THET2	522	38	2095	0.52808	1	1	100
Annotation Cluster 85	Enrichment Score: 0.04462317454348162
Category	Term	Count	%	PValue	Genes	List Total	Pop Hits	Pop Total	Fold Enrichment	Bonferroni	Benjamini	FDR
GOTERM_BP_FAT	GO:0032940~secretion by cell	3	0.365408	0.902354	Q72GK3_THET2, Q72KF0_THET2, Q72IW4_THET2	447	14	1772	0.849473	1	0.999983	100
GOTERM_BP_FAT	GO:0009306~protein secretion	3	0.365408	0.902354	Q72GK3_THET2, Q72KF0_THET2, Q72IW4_THET2	447	14	1772	0.849473	1	0.999983	100
GOTERM_BP_FAT	GO:0046903~secretion	3	0.365408	0.902354	Q72GK3_THET2, Q72KF0_THET2, Q72IW4_THET2	447	14	1772	0.849473	1	0.999983	100
Annotation Cluster 86	Enrichment Score: 0.04442949087827816
Category	Term	Count	%	PValue	Genes	List Total	Pop Hits	Pop Total	Fold Enrichment	Bonferroni	Benjamini	FDR
SP_PIR_KEYWORDS	transmembrane	34	4.14129	0.768399	UPPP_THET2, Q72GC8_THET2, Q72G86_THET2, Q72G85_THET2, Q72JA5_THET2, Q72IA4_THET2, Q72IY3_THET2, Q72J44_THET2, Q72GE0_THET2, Q72JG2_THET2, Q72I62_THET2, Q72KV0_THET2, Q72JZ3_THET2, Q72KF0_THET2, Q72HC8_THET2, Q72LJ2_THET2, Q72HI2_THET2, Q72KF9_THET2, Q72IJ3_THET2, Q72H24_THET2, Q72KH1_THET2, Q72KP0_THET2, Q72GE1_THET2, Q72G87_THET2, NUOK_THET2, Q72GS3_THET2, Q72IM4_THET2, COXX_THET2, Q72K84_THET2,…	821	189	4254	0.932119	1	0.967917	100
SP_PIR_KEYWORDS	transport	29	3.53228	0.78422	SECA_THET2, NUOC_THET2, Q72G86_THET2, Q72IW4_THET2, Q72JA5_THET2, Q72I66_THET2, Q72J44_THET2, Q72JG2_THET2, Q72I62_THET2, Q72KV0_THET2, Q72KF0_THET2, Q72HC8_THET2, Q72LJ2_THET2, Q72HI2_THET2, Q72H24_THET2, Q72KH1_THET2, VATB_THET2, VATA_THET2, Q72KP0_THET2, NUOK_THET2, Q72G87_THET2, VATE_THET2, Q72IM4_THET2, VATC_THET2, VATD_THET2, Q72K84_THET2, Q72HG2_THET2, Q72LF8_THET2, NUOD_THET2, Q72KS3_THET…	821	163	4254	0.921859	1	0.967316	100
SP_PIR_KEYWORDS	membrane	28	3.41048	0.888646	SECA_THET2, UPPP_THET2, NUOC_THET2, Q72G86_THET2, Q72JA5_THET2, Q72IA4_THET2, Q72IY3_THET2, Q72J44_THET2, Q72JG2_THET2, Q72I62_THET2, Q72KV0_THET2, Q72JZ3_THET2, Q72KF0_THET2, Q72LJ2_THET2, Q72HI2_THET2, Q72IJ3_THET2, Q72KH1_THET2, NUOK_THET2, Q72G87_THET2, Q72L34_THET2, Q72GS3_THET2, COXX_THET2, Q72HG2_THET2, Q72IL9_THET2, NUOD_THET2, PLSY_THET2, Q72KS3_THET2, Q72JR4_THET2, MURG_THET2, Q72HN1_TH…	821	169	4254	0.858471	1	0.991043	100
SP_PIR_KEYWORDS	cell membrane	27	3.28867	0.912529	SECA_THET2, UPPP_THET2, Q72G86_THET2, NUOC_THET2, Q72JA5_THET2, Q72J44_THET2, Q72JG2_THET2, Q72J80_THET2, Q72L96_THET2, Q72I62_THET2, Q72KV0_THET2, Q72KF0_THET2, Q72HI2_THET2, Q72KH1_THET2, Q72G87_THET2, NUOK_THET2, Q72GS3_THET2, Q72L34_THET2, COXX_THET2, Q72HG2_THET2, Q72GR6_THET2, Q72IL9_THET2, NUOD_THET2, PLSY_THET2, Q72KS3_THET2, Q72I35_THET2, Q72JR4_THET2, MURG_THET2, Q72HN1_THET2	821	167	4254	0.837725	1	0.99395	100
GOTERM_CC_FAT	GO:0016021~integral to membrane	49	5.96833	0.999993	Q72GX6_THET2, UPPP_THET2, Q72GS0_THET2, Q72JA5_THET2, Q72IA4_THET2, Q746N4_THET2, Q72JF5_THET2, Q72J44_THET2, Q72IY3_THET2, Q72J05_THET2, Q72JG2_THET2, Q72KV0_THET2, Q72JZ3_THET2, Q72GQ7_THET2, Q72HC8_THET2, Q72KF0_THET2, Q72H92_THET2, Q72LJ2_THET2, Q72HI2_THET2, Q72KF9_THET2, Q72H24_THET2, Q72GE1_THET2, Q72G87_THET2, Q746P5_THET2, Q72IM4_THET2, Q72KS3_THET2, PLSY_THET2, Q72IJ5_THET2, Q72IK4_THET…	127	271	499	0.710434	1	1	100
GOTERM_CC_FAT	GO:0031224~intrinsic to membrane	49	5.96833	0.999993	Q72GX6_THET2, UPPP_THET2, Q72GS0_THET2, Q72JA5_THET2, Q72IA4_THET2, Q746N4_THET2, Q72JF5_THET2, Q72J44_THET2, Q72IY3_THET2, Q72J05_THET2, Q72JG2_THET2, Q72KV0_THET2, Q72JZ3_THET2, Q72GQ7_THET2, Q72HC8_THET2, Q72KF0_THET2, Q72H92_THET2, Q72LJ2_THET2, Q72HI2_THET2, Q72KF9_THET2, Q72H24_THET2, Q72GE1_THET2, Q72G87_THET2, Q746P5_THET2, Q72IM4_THET2, Q72KS3_THET2, PLSY_THET2, Q72IJ5_THET2, Q72IK4_THET…	127	271	499	0.710434	1	1	100
GOTERM_CC_FAT	GO:0005886~plasma membrane	23	2.80146	0.999999	Q72GX6_THET2, Q72KH1_THET2, SECA_THET2, Q72H24_THET2, UPPP_THET2, NUOC_THET2, Q72G85_THET2, Q72JA5_THET2, Q72GS3_THET2, Q72J44_THET2, COXX_THET2, Q72I62_THET2, Q72HG2_THET2, Q72KV0_THET2, Q72KK9_THET2, Q72KF0_THET2, NUOD_THET2, Q72KS3_THET2, PLSY_THET2, Q72JR4_THET2, Q72HI2_THET2, MURG_THET2, Q72HN1_THET2	127	168	499	0.537917	1	1	100
Annotation Cluster 87	Enrichment Score: 0.03965547502935427
Category	Term	Count	%	PValue	Genes	List Total	Pop Hits	Pop Total	Fold Enrichment	Bonferroni	Benjamini	FDR
GOTERM_BP_FAT	GO:0009119~ribonucleoside metabolic process	4	0.487211	0.892978	NDK_THET2, TGT_THET2, Q72HX7_THET2, Q72ID7_THET2	447	19	1772	0.83457	1	0.999978	100
GOTERM_BP_FAT	GO:0042278~purine nucleoside metabolic process	3	0.365408	0.922776	TGT_THET2, Q72HX7_THET2, Q72ID7_THET2	447	15	1772	0.792841	1	0.999991	100
GOTERM_BP_FAT	GO:0046128~purine ribonucleoside metabolic process	3	0.365408	0.922776	TGT_THET2, Q72HX7_THET2, Q72ID7_THET2	447	15	1772	0.792841	1	0.999991	100
Annotation Cluster 88	Enrichment Score: 0.032287912023080144
Category	Term	Count	%	PValue	Genes	List Total	Pop Hits	Pop Total	Fold Enrichment	Bonferroni	Benjamini	FDR
SP_PIR_KEYWORDS	Protease	11	1.33983	0.683064	Q72IM1_THET2, Q72G85_THET2, Q72L01_THET2, Q72I26_THET2, Q72IX8_THET2, Q72J25_THET2, Q72L86_THET2, Q72J50_THET2, Q72J79_THET2, Q72KS5_THET2, CLPP_THET2	821	57	4254	0.999936	1	0.944846	99.9999
GOTERM_MF_FAT	GO:0004222~metalloendopeptidase activity	5	0.609013	0.962262	Q72IK4_THET2, Q72HS5_THET2, Q72IG4_THET2, Q72HI6_THET2, Q72LM3_THET2, Q72J79_THET2	522	30	2095	0.668902	1	1	100
GOTERM_MF_FAT	GO:0004175~endopeptidase activity	10	1.21803	0.971261	Q72IK4_THET2, Q72HS5_THET2, Q72GA0_THET2, Q72G85_THET2, Q72IG4_THET2, Q72HI6_THET2, Q72J25_THET2, Q72LM3_THET2, Q72J79_THET2, Q72KS5_THET2, CLPP_THET2	522	58	2095	0.691967	1	1	100
GOTERM_MF_FAT	GO:0070011~peptidase activity, acting on L-amino acid peptides	19	2.31425	0.977595	Q72IK4_THET2, Q72HS5_THET2, LYSK_THET2, Q72G85_THET2, Q72IG4_THET2, Q72HM9_THET2, Q72J25_THET2, Q72I26_THET2, Q72GY3_THET2, Q72H05_THET2, Q72GA0_THET2, Q72L01_THET2, Q72HI6_THET2, Q72IX8_THET2, Q72J50_THET2, Q72LM3_THET2, Q72KS5_THET2, Q72JI4_THET2, Q72J79_THET2, CLPP_THET2	522	104	2095	0.733219	1	1	100
GOTERM_BP_FAT	GO:0006508~proteolysis	18	2.19245	0.978163	Q72IK4_THET2, Q72HS5_THET2, LYSK_THET2, Q72G85_THET2, Q72IG4_THET2, Q72HM9_THET2, Q72J25_THET2, Q72I26_THET2, Q72GY3_THET2, Q72H05_THET2, Q72GA0_THET2, Q72HI6_THET2, Q72IX8_THET2, Q72J50_THET2, Q72LM3_THET2, Q72KS5_THET2, Q72JI4_THET2, Q72J79_THET2, CLPP_THET2	447	98	1772	0.728119	1	1	100
GOTERM_MF_FAT	GO:0008233~peptidase activity	21	2.55786	0.985452	Q72IK4_THET2, Q72HS5_THET2, LYSK_THET2, Q72IM1_THET2, Q72G85_THET2, Q72IG4_THET2, Q72HM9_THET2, Q72J25_THET2, Q72I26_THET2, Q72GY3_THET2, Q72H05_THET2, Q72GA0_THET2, Q72L01_THET2, Q72HI6_THET2, Q72IX8_THET2, Q72L86_THET2, Q72J50_THET2, Q72LM3_THET2, Q72KS5_THET2, Q72JI4_THET2, Q72J79_THET2, CLPP_THET2	522	117	2095	0.720356	1	1	100
GOTERM_MF_FAT	GO:0008237~metallopeptidase activity	9	1.09622	0.987843	Q72GY3_THET2, Q72IK4_THET2, Q72HS5_THET2, LYSK_THET2, Q72H05_THET2, Q72IG4_THET2, Q72HI6_THET2, Q72I26_THET2, Q72LM3_THET2, Q72J79_THET2	522	58	2095	0.622771	1	1	100
Annotation Cluster 89	Enrichment Score: 0.025192008289785617
Category	Term	Count	%	PValue	Genes	List Total	Pop Hits	Pop Total	Fold Enrichment	Bonferroni	Benjamini	FDR
GOTERM_MF_FAT	GO:0070035~purine NTP-dependent helicase activity	3	0.365408	0.91892	Q72G97_THET2, Q72IS0_THET2, Q72KB4_THET2	522	15	2095	0.802682	1	1	100
GOTERM_MF_FAT	GO:0008026~ATP-dependent helicase activity	3	0.365408	0.91892	Q72G97_THET2, Q72IS0_THET2, Q72KB4_THET2	522	15	2095	0.802682	1	1	100
SP_PIR_KEYWORDS	helicase	3	0.365408	0.944184	Q72G97_THET2, Q72IS0_THET2, Q72KB4_THET2	821	22	4254	0.706566	1	0.99728	100
GOTERM_MF_FAT	GO:0004386~helicase activity	3	0.365408	0.994535	Q72G97_THET2, Q72IS0_THET2, Q72KB4_THET2	522	26	2095	0.463086	1	1	100
Annotation Cluster 90	Enrichment Score: 0.022556747980420972
Category	Term	Count	%	PValue	Genes	List Total	Pop Hits	Pop Total	Fold Enrichment	Bonferroni	Benjamini	FDR
GOTERM_BP_FAT	GO:0019748~secondary metabolic process	7	0.852619	0.874714	TPIS_THET2, NADD_THET2, ISPE_THET2, ISPH_THET2, DXS_THET2, ISPD_THET2, Q72GU9_THET2	447	33	1772	0.840892	1	0.99997	100
GOTERM_BP_FAT	GO:0046496~nicotinamide nucleotide metabolic process	3	0.365408	0.95216	TPIS_THET2, NADD_THET2, Q72GU9_THET2	447	17	1772	0.699566	1	0.999998	100
GOTERM_BP_FAT	GO:0006769~nicotinamide metabolic process	3	0.365408	0.95216	TPIS_THET2, NADD_THET2, Q72GU9_THET2	447	17	1772	0.699566	1	0.999998	100
GOTERM_BP_FAT	GO:0009820~alkaloid metabolic process	3	0.365408	0.95216	TPIS_THET2, NADD_THET2, Q72GU9_THET2	447	17	1772	0.699566	1	0.999998	100
GOTERM_BP_FAT	GO:0006733~oxidoreduction coenzyme metabolic process	3	0.365408	0.970683	TPIS_THET2, NADD_THET2, Q72GU9_THET2	447	19	1772	0.625927	1	1	100
GOTERM_BP_FAT	GO:0019362~pyridine nucleotide metabolic process	3	0.365408	0.970683	TPIS_THET2, NADD_THET2, Q72GU9_THET2	447	19	1772	0.625927	1	1	100
GOTERM_BP_FAT	GO:0043603~cellular amide metabolic process	3	0.365408	0.97713	TPIS_THET2, NADD_THET2, Q72GU9_THET2	447	20	1772	0.594631	1	1	100
Annotation Cluster 91	Enrichment Score: 0.01277340866604515
Category	Term	Count	%	PValue	Genes	List Total	Pop Hits	Pop Total	Fold Enrichment	Bonferroni	Benjamini	FDR
SMART	SM00729:Elp3	3	0.365408	0.964476	LIPA_THET2, Q72I78_THET2, Q72KR6_THET2	108	24	552	0.638889	1	1	100
INTERPRO	IPR006638:Elongator protein 3/MiaB/NifB	3	0.365408	0.974303	LIPA_THET2, Q72I78_THET2, Q72KR6_THET2	733	24	3493	0.595668	1	1	100
INTERPRO	IPR007197:Radical SAM	3	0.365408	0.974303	LIPA_THET2, Q72I78_THET2, Q72KR6_THET2	733	24	3493	0.595668	1	1	100
Annotation Cluster 92	Enrichment Score: 0.009012634843932036
Category	Term	Count	%	PValue	Genes	List Total	Pop Hits	Pop Total	Fold Enrichment	Bonferroni	Benjamini	FDR
GOTERM_MF_FAT	GO:0008509~anion transmembrane transporter activity	3	0.365408	0.949341	Q72KH1_THET2, Q72L34_THET2, Q72KH0_THET2	522	17	2095	0.708249	1	1	100
GOTERM_BP_FAT	GO:0015698~inorganic anion transport	3	0.365408	0.993579	Q72KH1_THET2, Q72L34_THET2, Q72KH0_THET2	447	25	1772	0.475705	1	1	100
GOTERM_BP_FAT	GO:0006820~anion transport	3	0.365408	0.996179	Q72KH1_THET2, Q72L34_THET2, Q72KH0_THET2	447	27	1772	0.440467	1	1	100
Annotation Cluster 93	Enrichment Score: 0.004841437586348296
Category	Term	Count	%	PValue	Genes	List Total	Pop Hits	Pop Total	Fold Enrichment	Bonferroni	Benjamini	FDR
SMART	SM00448:REC	3	0.365408	0.983496	Q72JY5_THET2, Q72GJ8_THET2, Q72GJ9_THET2, Q72G70_THET2	108	28	552	0.547619	1	1	100
GOTERM_BP_FAT	GO:0000160~two-component signal transduction system (phosphorelay)	7	0.852619	0.986885	Q72JY5_THET2, Q72GJ8_THET2, Q72IA4_THET2, Q72IJ3_THET2, Q72JF5_THET2, Q72GJ9_THET2, Q72G70_THET2, Q72IY3_THET2	447	46	1772	0.603249	1	1	100
INTERPRO	IPR001789:Signal transduction response regulator, receiver region	3	0.365408	0.988597	Q72JY5_THET2, Q72GJ8_THET2, Q72GJ9_THET2, Q72G70_THET2	733	28	3493	0.510573	1	1	100
GOTERM_MF_FAT	GO:0000156~two-component response regulator activity	3	0.365408	0.996726	Q72JY5_THET2, Q72GJ8_THET2, Q72GJ9_THET2, Q72G70_THET2	522	28	2095	0.430008	1	1	100

## Sheet: 5c-12_34_common
Annotation Cluster 1	Enrichment Score: 6.353195045549165
Category	Term	Count	%	PValue	Genes	List Total	Pop Hits	Pop Total	Fold Enrichment	Bonferroni	Benjamini	FDR
GOTERM_BP_FAT	GO:0006412~translation	61	8.54342	2.29828e-11	Q72GJ6_THET2, SYD_THET2, RL10_THET2, RS9_THET2, SYFB_THET2, RL18_THET2, SYP_THET2, SYS_THET2, DEF_THET2, RL23_THET2, SYA_THET2, RS11_THET2, GATB_THET2, RS18_THET2, RL33_THET2, SYG_THET2, Q72JB4_THET2, RL27_THET2, SYH_THET2, SYI_THET2, RL9_THET2, IF2_THET2, RS15_THET2, RL7_THET2, RL19_THET2, EFTS_THET2, RRF_THET2, SYT_THET2, RS8_THET2, EFTU_THET2, RL4_THET2, Q72J48_THET2, RS4_THET2, RL13_THET2, PT…	407	121	1772	2.1949	1.27095e-08	1.27095e-08	3.35648e-08
SP_PIR_KEYWORDS	ribosomal protein	33	4.62185	1.30846e-10	RS8_THET2, RL4_THET2, RS4_THET2, RL13_THET2, RL10_THET2, RS9_THET2, RL18_THET2, RS13_THET2, RL6_THET2, RL23_THET2, RS5_THET2, RS11_THET2, RL25_THET2, RS18_THET2, RS20_THET2, RL33_THET2, RL35_THET2, RL1_THET2, RL21_THET2, RL27_THET2, RL32_THET2, RL9_THET2, Q72GM4_THET2, Q72HE6_THET2, RL17_THET2, RS15_THET2, RL20_THET2, RL7_THET2, RL19_THET2, RS7_THET2, Q72K74_THET2, RS2_THET2, RL3_THET2	714	61	4254	3.22317	2.22438e-08	2.22438e-08	1.5963e-07
SP_PIR_KEYWORDS	ribonucleoprotein	30	4.20168	4.26665e-09	RS8_THET2, RL4_THET2, RS4_THET2, RL13_THET2, RL10_THET2, RS9_THET2, RL18_THET2, RS13_THET2, RL6_THET2, RL23_THET2, RS5_THET2, RS11_THET2, RL25_THET2, RS18_THET2, RS20_THET2, RL33_THET2, RL35_THET2, RL1_THET2, RL21_THET2, RL27_THET2, RL32_THET2, RL9_THET2, RS15_THET2, RL20_THET2, RL17_THET2, RL7_THET2, RL19_THET2, RS7_THET2, RS2_THET2, RL3_THET2	714	58	4254	3.08172	7.2533e-07	2.41777e-07	5.20524e-06
GOTERM_CC_FAT	GO:0030529~ribonucleoprotein complex	34	4.7619	7.40053e-08	RS8_THET2, RL4_THET2, RS4_THET2, RL13_THET2, RL10_THET2, RS9_THET2, RL18_THET2, RS13_THET2, RL6_THET2, RL23_THET2, RS5_THET2, RS11_THET2, RL25_THET2, RS18_THET2, RS20_THET2, RL33_THET2, RL35_THET2, RL1_THET2, RL21_THET2, RL27_THET2, RL32_THET2, RL9_THET2, Q72GM4_THET2, Q72HE6_THET2, RL17_THET2, RS15_THET2, RL20_THET2, RL7_THET2, RL19_THET2, RS7_THET2, Q72K74_THET2, Q72JU4_THET2, RS2_THET2, RL3_TH…	116	64	499	2.28529	4.21829e-06	4.21829e-06	7.33555e-05
GOTERM_CC_FAT	GO:0005840~ribosome	33	4.62185	1.21946e-07	RS8_THET2, RL4_THET2, RS4_THET2, RL13_THET2, RL10_THET2, RS9_THET2, RL18_THET2, RS13_THET2, RL6_THET2, RL23_THET2, RS5_THET2, RS11_THET2, RL25_THET2, RS18_THET2, RS20_THET2, RL33_THET2, RL35_THET2, RL1_THET2, RL21_THET2, RL27_THET2, RL32_THET2, RL9_THET2, Q72GM4_THET2, Q72HE6_THET2, RL17_THET2, RS15_THET2, RL20_THET2, RL7_THET2, RL19_THET2, RS7_THET2, Q72K74_THET2, RS2_THET2, RL3_THET2	116	62	499	2.28963	6.95088e-06	3.47545e-06	0.000120875
GOTERM_CC_FAT	GO:0043232~intracellular non-membrane-bounded organelle	38	5.32213	2.60366e-07	Q72J57_THET2, RS8_THET2, Q72IZ1_THET2, RL4_THET2, RS4_THET2, RL10_THET2, RL13_THET2, RS9_THET2, Q72J83_THET2, RL18_THET2, RS13_THET2, RL6_THET2, RL23_THET2, RS5_THET2, RS11_THET2, RL25_THET2, RS18_THET2, RS20_THET2, RL35_THET2, RL33_THET2, Q72GB7_THET2, RL1_THET2, RL21_THET2, RL27_THET2, RL32_THET2, RL9_THET2, Q72GM4_THET2, Q72HE6_THET2, RL17_THET2, RL20_THET2, RS15_THET2, RL7_THET2, Q72KA4_THET2…	116	79	499	2.06918	1.48408e-05	4.94695e-06	0.00025808
GOTERM_CC_FAT	GO:0043228~non-membrane-bounded organelle	38	5.32213	2.60366e-07	Q72J57_THET2, RS8_THET2, Q72IZ1_THET2, RL4_THET2, RS4_THET2, RL10_THET2, RL13_THET2, RS9_THET2, Q72J83_THET2, RL18_THET2, RS13_THET2, RL6_THET2, RL23_THET2, RS5_THET2, RS11_THET2, RL25_THET2, RS18_THET2, RS20_THET2, RL35_THET2, RL33_THET2, Q72GB7_THET2, RL1_THET2, RL21_THET2, RL27_THET2, RL32_THET2, RL9_THET2, Q72GM4_THET2, Q72HE6_THET2, RL17_THET2, RL20_THET2, RS15_THET2, RL7_THET2, Q72KA4_THET2…	116	79	499	2.06918	1.48408e-05	4.94695e-06	0.00025808
KEGG_PATHWAY	tth03010:Ribosome	31	4.34174	3.64448e-07	RS8_THET2, RL4_THET2, RS4_THET2, RL13_THET2, RL10_THET2, RS9_THET2, RL18_THET2, RS13_THET2, RL6_THET2, RL23_THET2, RS5_THET2, RS11_THET2, RL25_THET2, RS18_THET2, RS20_THET2, RL33_THET2, RL35_THET2, RL1_THET2, RL21_THET2, RL27_THET2, RL32_THET2, RL9_THET2, Q72GM4_THET2, RL17_THET2, RS15_THET2, RL20_THET2, RL7_THET2, RL19_THET2, RS7_THET2, RS2_THET2, RL3_THET2	315	52	1244	2.35433	4.19107e-05	2.09555e-05	0.000415135
GOTERM_MF_FAT	GO:0005198~structural molecule activity	31	4.34174	5.06306e-07	RS8_THET2, RL4_THET2, RS4_THET2, RL13_THET2, RS9_THET2, RL18_THET2, RS13_THET2, RL6_THET2, RL23_THET2, RS5_THET2, RS11_THET2, RL25_THET2, RS18_THET2, RS20_THET2, RL33_THET2, RL35_THET2, Q72I60_THET2, RL1_THET2, RL21_THET2, RL27_THET2, RL32_THET2, RL9_THET2, Q72GM4_THET2, RS15_THET2, RL20_THET2, RL17_THET2, RL7_THET2, RL19_THET2, RS7_THET2, RS2_THET2, RL3_THET2	464	58	2095	2.41324	0.000290578	0.000290578	0.000743239
SP_PIR_KEYWORDS	rrna-binding	23	3.22129	5.4651e-07	RL33_THET2, RS8_THET2, RL4_THET2, RL1_THET2, RL21_THET2, RS4_THET2, RL9_THET2, RS9_THET2, RS15_THET2, RL20_THET2, RL18_THET2, RL19_THET2, RS13_THET2, RL6_THET2, RS7_THET2, RL23_THET2, RS5_THET2, RS11_THET2, RL25_THET2, RS2_THET2, RL3_THET2, RS20_THET2, RS18_THET2	714	45	4254	3.04519	9.29025e-05	1.32723e-05	0.000666731
GOTERM_MF_FAT	GO:0003735~structural constituent of ribosome	30	4.20168	7.66847e-07	RS8_THET2, RL4_THET2, RS4_THET2, RL13_THET2, RS9_THET2, RL18_THET2, RS13_THET2, RL6_THET2, RL23_THET2, RS5_THET2, RS11_THET2, RL25_THET2, RS18_THET2, RS20_THET2, RL33_THET2, RL35_THET2, RL1_THET2, RL21_THET2, RL27_THET2, RL32_THET2, RL9_THET2, Q72GM4_THET2, RS15_THET2, RL20_THET2, RL17_THET2, RL7_THET2, RL19_THET2, RS7_THET2, RS2_THET2, RL3_THET2	464	56	2095	2.4188	0.000440073	0.000220061	0.0011257
SP_PIR_KEYWORDS	rna-binding	30	4.20168	1.33203e-05	RS8_THET2, RL4_THET2, Q72J48_THET2, RS4_THET2, RS9_THET2, SYFB_THET2, RL18_THET2, RS13_THET2, RL6_THET2, THII_THET2, RL23_THET2, SYA_THET2, RS5_THET2, RS11_THET2, RL25_THET2, PNP_THET2, RS18_THET2, RS20_THET2, RL33_THET2, Q72KG4_THET2, RL1_THET2, RL21_THET2, Q72K93_THET2, RL9_THET2, RS15_THET2, RL20_THET2, RL19_THET2, RS7_THET2, RS2_THET2, RL3_THET2	714	79	4254	2.26253	0.00226191	0.000226422	0.0162494
GOTERM_MF_FAT	GO:0019843~rRNA binding	23	3.22129	5.62088e-05	RL33_THET2, RS8_THET2, RL4_THET2, RL1_THET2, RL21_THET2, RS4_THET2, RL9_THET2, RS9_THET2, RS15_THET2, RL20_THET2, RL18_THET2, RL19_THET2, RS13_THET2, RL6_THET2, RS7_THET2, RL23_THET2, RS5_THET2, RS11_THET2, RL25_THET2, RS2_THET2, RL3_THET2, RS20_THET2, RS18_THET2	464	45	2095	2.30771	0.0317498	0.0106973	0.082481
KEGG_PATHWAY	ttj03010:Ribosome	28	3.92157	0.000363498	RS8_THET2, RL4_THET2, RS4_THET2, RL13_THET2, RL10_THET2, RS9_THET2, RL18_THET2, RS13_THET2, RL6_THET2, RL23_THET2, RS5_THET2, RS18_THET2, RS20_THET2, RL33_THET2, RL35_THET2, RL1_THET2, RL21_THET2, RL27_THET2, RL32_THET2, RL9_THET2, Q72GM4_THET2, RS15_THET2, RL20_THET2, RL17_THET2, RL7_THET2, RL19_THET2, RS2_THET2, RL3_THET2	315	59	1244	1.8742	0.0409479	0.00832711	0.413273
GOTERM_MF_FAT	GO:0003723~RNA binding	39	5.46218	0.0304822	RS8_THET2, RL4_THET2, Q72J48_THET2, RS4_THET2, RS9_THET2, TRUA_THET2, SYFB_THET2, RL18_THET2, RS13_THET2, Q72HM4_THET2, RL6_THET2, RL23_THET2, THII_THET2, RS5_THET2, RS11_THET2, RL25_THET2, PROB_THET2, PNP_THET2, RS18_THET2, RS20_THET2, RL33_THET2, NUSB_THET2, Q72KG4_THET2, RL1_THET2, RL21_THET2, Q72K93_THET2, TRUD_THET2, RL9_THET2, Q72GM4_THET2, RL20_THET2, RS15_THET2, RL19_THET2, RS7_THET2, Q72…	464	130	2095	1.35453	1	0.801182	36.5191
Annotation Cluster 2	Enrichment Score: 3.783229073105872
Category	Term	Count	%	PValue	Genes	List Total	Pop Hits	Pop Total	Fold Enrichment	Bonferroni	Benjamini	FDR
SP_PIR_KEYWORDS	protein biosynthesis	32	4.48179	1.36978e-10	EFTU_THET2, RS8_THET2, Q72J48_THET2, SYD_THET2, SYFB_THET2, SYP_THET2, SYS_THET2, SYK_THET2, RL6_THET2, DEF_THET2, SYA_THET2, SYR_THET2, Q72GM3_THET2, GATB_THET2, SYN_THET2, SYG_THET2, Q72JB4_THET2, FMT_THET2, SYH_THET2, SYI_THET2, SYV_THET2, IF2_THET2, EFG_THET2, RS15_THET2, Q72L79_THET2, SYC_THET2, GATA_THET2, EFTS_THET2, RRF_THET2, RS2_THET2, SYT_THET2	714	58	4254	3.28716	2.32862e-08	1.16431e-08	1.67111e-07
KEGG_PATHWAY	tth00970:Aminoacyl-tRNA biosynthesis	21	2.94118	3.35454e-08	SYG_THET2, SYN_THET2, Q72JB4_THET2, Q72J48_THET2, SYD_THET2, FMT_THET2, SYH_THET2, SYI_THET2, SYV_THET2, SYFB_THET2, Q72L79_THET2, SYC_THET2, SYP_THET2, GATA_THET2, SYS_THET2, SYK_THET2, SYA_THET2, SYR_THET2, GATB_THET2, Q72GM3_THET2, SYT_THET2	315	26	1244	3.18974	3.85771e-06	3.85771e-06	3.82109e-05
SP_PIR_KEYWORDS	ligase	40	5.60224	5.44563e-06	ACCD_THET2, Q72H76_THET2, PANC_THET2, PURL_THET2, Q72J48_THET2, SYD_THET2, PURQ_THET2, Q72JQ4_THET2, SYFB_THET2, SYP_THET2, Q72GY5_THET2, SYK_THET2, SYS_THET2, CARA_THET2, SYA_THET2, SYR_THET2, Q72GM3_THET2, GATB_THET2, Q72JP8_THET2, SYN_THET2, SYG_THET2, Q72JB4_THET2, Q72L91_THET2, CARB_THET2, Q72GE4_THET2, SYH_THET2, MURD_THET2, SYI_THET2, Q72JL4_THET2, Q72IE0_THET2, SYV_THET2, DDL_THET2, Q72L7…	714	116	4254	2.05448	0.000925332	0.000115713	0.00664338
SP_PIR_KEYWORDS	Aminoacyl-tRNA synthetase	18	2.52101	7.43222e-06	SYG_THET2, SYN_THET2, Q72JB4_THET2, Q72J48_THET2, SYD_THET2, SYH_THET2, SYI_THET2, SYV_THET2, SYFB_THET2, Q72L79_THET2, SYP_THET2, SYC_THET2, SYK_THET2, SYS_THET2, SYA_THET2, SYR_THET2, Q72GM3_THET2, SYT_THET2	714	34	4254	3.15423	0.00126268	0.000140377	0.00906681
GOTERM_BP_FAT	GO:0043039~tRNA aminoacylation	18	2.52101	0.000443983	SYG_THET2, SYN_THET2, Q72JB4_THET2, Q72J48_THET2, SYD_THET2, SYH_THET2, SYI_THET2, SYV_THET2, SYFB_THET2, Q72L79_THET2, SYP_THET2, SYC_THET2, SYK_THET2, SYS_THET2, SYA_THET2, SYR_THET2, Q72GM3_THET2, SYT_THET2	407	34	1772	2.30496	0.217747	0.115549	0.646452
GOTERM_BP_FAT	GO:0043038~amino acid activation	18	2.52101	0.000443983	SYG_THET2, SYN_THET2, Q72JB4_THET2, Q72J48_THET2, SYD_THET2, SYH_THET2, SYI_THET2, SYV_THET2, SYFB_THET2, Q72L79_THET2, SYP_THET2, SYC_THET2, SYK_THET2, SYS_THET2, SYA_THET2, SYR_THET2, Q72GM3_THET2, SYT_THET2	407	34	1772	2.30496	0.217747	0.115549	0.646452
GOTERM_BP_FAT	GO:0006418~tRNA aminoacylation for protein translation	18	2.52101	0.000443983	SYG_THET2, SYN_THET2, Q72JB4_THET2, Q72J48_THET2, SYD_THET2, SYH_THET2, SYI_THET2, SYV_THET2, SYFB_THET2, Q72L79_THET2, SYP_THET2, SYC_THET2, SYK_THET2, SYS_THET2, SYA_THET2, SYR_THET2, Q72GM3_THET2, SYT_THET2	407	34	1772	2.30496	0.217747	0.115549	0.646452
GOTERM_MF_FAT	GO:0016875~ligase activity, forming carbon-oxygen bonds	18	2.52101	0.00044429	SYG_THET2, SYN_THET2, Q72JB4_THET2, Q72J48_THET2, SYD_THET2, SYH_THET2, SYI_THET2, SYV_THET2, SYFB_THET2, Q72L79_THET2, SYP_THET2, SYC_THET2, SYK_THET2, SYS_THET2, SYA_THET2, SYR_THET2, Q72GM3_THET2, SYT_THET2	464	35	2095	2.32204	0.225145	0.061779	0.650225
GOTERM_MF_FAT	GO:0016876~ligase activity, forming aminoacyl-tRNA and related compounds	18	2.52101	0.00044429	SYG_THET2, SYN_THET2, Q72JB4_THET2, Q72J48_THET2, SYD_THET2, SYH_THET2, SYI_THET2, SYV_THET2, SYFB_THET2, Q72L79_THET2, SYP_THET2, SYC_THET2, SYK_THET2, SYS_THET2, SYA_THET2, SYR_THET2, Q72GM3_THET2, SYT_THET2	464	35	2095	2.32204	0.225145	0.061779	0.650225
GOTERM_MF_FAT	GO:0004812~aminoacyl-tRNA ligase activity	18	2.52101	0.00044429	SYG_THET2, SYN_THET2, Q72JB4_THET2, Q72J48_THET2, SYD_THET2, SYH_THET2, SYI_THET2, SYV_THET2, SYFB_THET2, Q72L79_THET2, SYP_THET2, SYC_THET2, SYK_THET2, SYS_THET2, SYA_THET2, SYR_THET2, Q72GM3_THET2, SYT_THET2	464	35	2095	2.32204	0.225145	0.061779	0.650225
GOTERM_BP_FAT	GO:0006399~tRNA metabolic process	26	3.64146	0.00596089	TRMFO_THET2, MIAA_THET2, Q72J48_THET2, SYD_THET2, TRUA_THET2, SYFB_THET2, SYP_THET2, SYK_THET2, SYS_THET2, MNME_THET2, SYA_THET2, SYR_THET2, Q72GM3_THET2, SYN_THET2, SYG_THET2, Q72JB4_THET2, TGT_THET2, SYH_THET2, TRUD_THET2, SYI_THET2, SYV_THET2, TRMI_THET2, SYC_THET2, Q72L79_THET2, TRUB_THET2, SYT_THET2	407	68	1772	1.66469	0.963346	0.66782	8.36118
INTERPRO	IPR006195:Aminoacyl-tRNA synthetase, class II, conserved region	8	1.12045	0.0114377	SYG_THET2, SYN_THET2, SYP_THET2, SYK_THET2, SYS_THET2, SYD_THET2, SYH_THET2, SYT_THET2	645	15	3493	2.88827	1	1	17.0719
GOTERM_BP_FAT	GO:0034660~ncRNA metabolic process	29	4.06162	0.0166456	Q72L94_THET2, TRMFO_THET2, MIAA_THET2, Q72J48_THET2, RSMG_THET2, SYD_THET2, SYFB_THET2, TRUA_THET2, SYP_THET2, SYS_THET2, SYK_THET2, MNME_THET2, SYA_THET2, SYR_THET2, Q72K73_THET2, Q72GM3_THET2, SYG_THET2, SYN_THET2, Q72JB4_THET2, TGT_THET2, TRUD_THET2, SYH_THET2, SYI_THET2, SYV_THET2, TRMI_THET2, Q72L79_THET2, SYC_THET2, TRUB_THET2, SYT_THET2	407	84	1772	1.5031	0.999907	0.901787	21.7407
INTERPRO	IPR001412:Aminoacyl-tRNA synthetase, class I, conserved site	7	0.980392	0.0203384	Q72JB4_THET2, Q72L79_THET2, SYC_THET2, SYI_THET2, SYR_THET2, Q72GM3_THET2, SYV_THET2	645	13	3493	2.91604	1	0.999998	28.4214
KEGG_PATHWAY	ttj00970:Aminoacyl-tRNA biosynthesis	12	1.68067	0.0541687	SYN_THET2, GATA_THET2, SYC_THET2, SYK_THET2, SYD_THET2, SYH_THET2, SYA_THET2, SYI_THET2, SYR_THET2, Q72GM3_THET2, GATB_THET2, SYV_THET2	315	27	1244	1.7552	0.998346	0.286146	46.9729
Annotation Cluster 3	Enrichment Score: 2.7105537610684842
Category	Term	Count	%	PValue	Genes	List Total	Pop Hits	Pop Total	Fold Enrichment	Bonferroni	Benjamini	FDR
SP_PIR_KEYWORDS	atp-binding	92	12.8852	4.35008e-08	KAD_THET2, Q72H76_THET2, KHSE_THET2, MIAA_THET2, SYD_THET2, RECA_THET2, Q72GK4_THET2, Q72GR3_THET2, Q72IA2_THET2, Q72IA4_THET2, PURQ_THET2, Q72IY3_THET2, Q72JQ4_THET2, Q72J05_THET2, SYFB_THET2, KGUA_THET2, Q72GJ2_THET2, Q72J43_THET2, Q72HJ8_THET2, SYP_THET2, SYS_THET2, Q72L01_THET2, Q72GJ8_THET2, Q72H73_THET2, SYA_THET2, Q72KF9_THET2, GATB_THET2, Q72L45_THET2, Q72G97_THET2, Q72GB7_THET2, VATA_THE…	714	321	4254	1.70758	7.3951e-06	1.47902e-06	5.30702e-05
SP_PIR_KEYWORDS	nucleotide-binding	97	13.5854	6.67307e-08	Q72H76_THET2, MIAA_THET2, RECA_THET2, Q72IA2_THET2, Q72IA4_THET2, PURQ_THET2, Q72IY3_THET2, Q72J05_THET2, KGUA_THET2, SYP_THET2, SYS_THET2, Q72KF9_THET2, SYA_THET2, Q72GJ8_THET2, Q72G97_THET2, Q72GB7_THET2, SYG_THET2, CH60_THET2, PGK_THET2, Q72GB4_THET2, DDL_THET2, Q72JP4_THET2, Q72LF8_THET2, ISPE_THET2, GUAA_THET2, SYT_THET2, EFTU_THET2, Q72IK4_THET2, PANC_THET2, Q72J48_THET2, CLPX_THET2, Y1664_…	714	347	4254	1.66549	1.13442e-05	1.8907e-06	8.14103e-05
GOTERM_MF_FAT	GO:0032553~ribonucleotide binding	116	16.2465	0.00619218	Q72H76_THET2, MIAA_THET2, MUTL_THET2, RECA_THET2, Q72IA2_THET2, Q72IA4_THET2, PURQ_THET2, Q72IY3_THET2, Q72J05_THET2, KGUA_THET2, SYP_THET2, Q72HJ8_THET2, SYS_THET2, Q72IH4_THET2, Q72GJ8_THET2, Q72H73_THET2, SYA_THET2, Q72KF9_THET2, Q72G97_THET2, Q72GB7_THET2, VATB_THET2, SYG_THET2, CH60_THET2, PGK_THET2, Q72GB4_THET2, DDL_THET2, VATD_THET2, Q72JP4_THET2, Q72LF8_THET2, ISPE_THET2, Q72LJ1_THET2, G…	464	430	2095	1.21802	0.971713	0.509864	8.71483
GOTERM_MF_FAT	GO:0032555~purine ribonucleotide binding	116	16.2465	0.00619218	Q72H76_THET2, MIAA_THET2, MUTL_THET2, RECA_THET2, Q72IA2_THET2, Q72IA4_THET2, PURQ_THET2, Q72IY3_THET2, Q72J05_THET2, KGUA_THET2, SYP_THET2, Q72HJ8_THET2, SYS_THET2, Q72IH4_THET2, Q72GJ8_THET2, Q72H73_THET2, SYA_THET2, Q72KF9_THET2, Q72G97_THET2, Q72GB7_THET2, VATB_THET2, SYG_THET2, CH60_THET2, PGK_THET2, Q72GB4_THET2, DDL_THET2, VATD_THET2, Q72JP4_THET2, Q72LF8_THET2, ISPE_THET2, Q72LJ1_THET2, G…	464	430	2095	1.21802	0.971713	0.509864	8.71483
GOTERM_MF_FAT	GO:0000166~nucleotide binding	148	20.7283	0.00694626	Q72H76_THET2, MIAA_THET2, MUTL_THET2, RECA_THET2, Q72IA2_THET2, Q72IA4_THET2, PURQ_THET2, Q72IY3_THET2, LEU3_THET2, Q72J05_THET2, KGUA_THET2, SYP_THET2, Q72HJ8_THET2, Q72IH4_THET2, SYS_THET2, NPD_THET2, Q72GJ8_THET2, Q72H73_THET2, Q72KF9_THET2, SYA_THET2, Q72G97_THET2, VATB_THET2, Q72JI3_THET2, Q72GB7_THET2, SYG_THET2, Q72K32_THET2, CH60_THET2, Q72JH4_THET2, PGK_THET2, Q72GB4_THET2, DDL_THET2, VA…	464	568	2095	1.17647	0.981704	0.486674	9.72636
GOTERM_MF_FAT	GO:0032559~adenyl ribonucleotide binding	104	14.5658	0.020219	Q72H76_THET2, MIAA_THET2, MUTL_THET2, RECA_THET2, Q72IA2_THET2, Q72IA4_THET2, PURQ_THET2, Q72IY3_THET2, Q72J05_THET2, KGUA_THET2, SYP_THET2, Q72HJ8_THET2, SYS_THET2, Q72GJ8_THET2, Q72H73_THET2, SYA_THET2, Q72KF9_THET2, Q72G97_THET2, Q72GB7_THET2, VATB_THET2, SYG_THET2, CH60_THET2, PGK_THET2, Q72GB4_THET2, DDL_THET2, VATD_THET2, Q72LF8_THET2, ISPE_THET2, GUAA_THET2, SYT_THET2, Q72IK4_THET2, PANC_T…	464	394	2095	1.1918	0.999992	0.812682	25.9071
GOTERM_MF_FAT	GO:0005524~ATP binding	104	14.5658	0.020219	Q72H76_THET2, MIAA_THET2, MUTL_THET2, RECA_THET2, Q72IA2_THET2, Q72IA4_THET2, PURQ_THET2, Q72IY3_THET2, Q72J05_THET2, KGUA_THET2, SYP_THET2, Q72HJ8_THET2, SYS_THET2, Q72GJ8_THET2, Q72H73_THET2, SYA_THET2, Q72KF9_THET2, Q72G97_THET2, Q72GB7_THET2, VATB_THET2, SYG_THET2, CH60_THET2, PGK_THET2, Q72GB4_THET2, DDL_THET2, VATD_THET2, Q72LF8_THET2, ISPE_THET2, GUAA_THET2, SYT_THET2, Q72IK4_THET2, PANC_T…	464	394	2095	1.1918	0.999992	0.812682	25.9071
GOTERM_MF_FAT	GO:0017076~purine nucleotide binding	126	17.6471	0.0229554	Q72H76_THET2, MIAA_THET2, MUTL_THET2, RECA_THET2, Q72IA2_THET2, Q72IA4_THET2, PURQ_THET2, Q72IY3_THET2, Q72J05_THET2, KGUA_THET2, SYP_THET2, Q72HJ8_THET2, SYS_THET2, Q72IH4_THET2, Q72GJ8_THET2, Q72H73_THET2, SYA_THET2, Q72KF9_THET2, Q72G97_THET2, VATB_THET2, Q72JI3_THET2, Q72GB7_THET2, SYG_THET2, CH60_THET2, PGK_THET2, Q72GB4_THET2, DDL_THET2, VATD_THET2, Q72JP4_THET2, Q72LF8_THET2, ISPE_THET2, Q…	464	490	2095	1.16102	0.999998	0.811045	28.8874
GOTERM_MF_FAT	GO:0001882~nucleoside binding	115	16.1064	0.0568521	Q72H76_THET2, MIAA_THET2, MUTL_THET2, RECA_THET2, Q72IA2_THET2, Q72IA4_THET2, PURQ_THET2, Q72IY3_THET2, Q72J05_THET2, KGUA_THET2, SYP_THET2, Q72HJ8_THET2, SYS_THET2, Q72GJ8_THET2, Q72H73_THET2, SYA_THET2, Q72KF9_THET2, Q72G97_THET2, Q72JI3_THET2, Q72GB7_THET2, VATB_THET2, SYG_THET2, CH60_THET2, PGK_THET2, Q72GB4_THET2, DDL_THET2, VATD_THET2, Q72LF8_THET2, ISPE_THET2, GUAA_THET2, SYT_THET2, Q72IK4…	464	457	2095	1.13618	1	0.909266	57.6513
GOTERM_MF_FAT	GO:0030554~adenyl nucleotide binding	114	15.9664	0.0608484	Q72H76_THET2, MIAA_THET2, MUTL_THET2, RECA_THET2, Q72IA2_THET2, Q72IA4_THET2, PURQ_THET2, Q72IY3_THET2, Q72J05_THET2, KGUA_THET2, SYP_THET2, Q72HJ8_THET2, SYS_THET2, Q72GJ8_THET2, Q72H73_THET2, SYA_THET2, Q72KF9_THET2, Q72G97_THET2, Q72JI3_THET2, Q72GB7_THET2, VATB_THET2, SYG_THET2, CH60_THET2, PGK_THET2, Q72GB4_THET2, DDL_THET2, VATD_THET2, Q72LF8_THET2, ISPE_THET2, GUAA_THET2, SYT_THET2, Q72IK4…	464	454	2095	1.13374	1	0.909492	60.2105
GOTERM_MF_FAT	GO:0001883~purine nucleoside binding	114	15.9664	0.0608484	Q72H76_THET2, MIAA_THET2, MUTL_THET2, RECA_THET2, Q72IA2_THET2, Q72IA4_THET2, PURQ_THET2, Q72IY3_THET2, Q72J05_THET2, KGUA_THET2, SYP_THET2, Q72HJ8_THET2, SYS_THET2, Q72GJ8_THET2, Q72H73_THET2, SYA_THET2, Q72KF9_THET2, Q72G97_THET2, Q72JI3_THET2, Q72GB7_THET2, VATB_THET2, SYG_THET2, CH60_THET2, PGK_THET2, Q72GB4_THET2, DDL_THET2, VATD_THET2, Q72LF8_THET2, ISPE_THET2, GUAA_THET2, SYT_THET2, Q72IK4…	464	454	2095	1.13374	1	0.909492	60.2105
Annotation Cluster 4	Enrichment Score: 1.9429565119661323
Category	Term	Count	%	PValue	Genes	List Total	Pop Hits	Pop Total	Fold Enrichment	Bonferroni	Benjamini	FDR
[truncated: 749 more rows]

## Sheet: 5d_12_only
Annotation Cluster 1	Enrichment Score: 2.539245511294549
Category	Term	Count	%	PValue	Genes	List Total	Pop Hits	Pop Total	Fold Enrichment	Bonferroni	Benjamini	FDR
[truncated: 347 more rows]

## Sheet: 5e_34_only
Annotation Cluster 1	Enrichment Score: 0.7161548003767897
[truncated: 69 more rows]

## Sheet: 5f_nopeaks
Annotation Cluster 1	Enrichment Score: 1.7702557423338867
[truncated: 373 more rows]
