# Supplementary material
Source: HighWire-hosted journal article supplement (doi:10.1101/rna.075580.120)
Supplement: Supplemental_Table_5a.xlsx [file Supplemental_Table_5a.xlsx]

## Sheet: all_tRNA-related_genes
Accession-1	Product
TT_RS07480	alanine--tRNA ligase
TT_RS09405	alanyl-tRNA editing protein
TT_RS09705	arginine--tRNA ligase
TT_RS01810	asparagine--tRNA ligase
TT_RS01825	aspartate--tRNA ligase
TT_RS05490	aspartate--tRNA(Asn) ligase
TT_RS08205	aspartyl/glutamyl-tRNA(Asn/Gln) amidotransferase subunit B
TT_RS02640	aspartyl/glutamyl-tRNA(Asn/Gln) amidotransferase subunit C
TT_RS02720	cysteine--tRNA ligase
TT_RS02960	D-aminoacyl-tRNA deacylase
TT_RS05440	FADH(2)-oxidizing methylenetetrahydrofolate--tRNA-(uracil(54)-C(5))- methyltransferase TrmFO
TT_RS00345	glutamate--tRNA ligase
TT_RS00920	glutamine--tRNA ligase
TT_RS05770	glutamyl-tRNA reductase
TT_RS01040	glutamyl-tRNA(Gln) amidotransferase subunit A
TT_RS00890	glycine--tRNA ligase
TT_RS01830	histidine--tRNA ligase
TT_RS03570	isoleucine--tRNA ligase
TT_RS09285	leucine--tRNA ligase
TT_RS03455	lysine--tRNA ligase
TT_RS04710	methionine--tRNA ligase subunit beta
TT_RS08425	methionyl-tRNA formyltransferase
TT_RS06185	peptidyl-tRNA hydrolase
TT_RS08060	phenylalanine--tRNA ligase subunit alpha
TT_RS08065	phenylalanine--tRNA ligase subunit beta
TT_RS09610	proline--tRNA ligase
TT_RS06735	prolyl-tRNA editing protein
TT_RS02635	serine--tRNA ligase
TT_RS07650	threonine--tRNA ligase
TT_RS01235	tRNA (adenine(58)-N(1))-methyltransferase TrmI
TT_RS01035	tRNA (adenosine(37)-N6)-dimethylallyltransferase MiaA
TT_RS00040	tRNA (adenosine(37)-N6)-threonylcarbamoyltransferase complex dimerization subunit type 1 TsaB
TT_RS04495	tRNA (adenosine(37)-N6)-threonylcarbamoyltransferase complex transferase subunit TsaD
TT_RS06340	tRNA (guanine-N(7)-)-methyltransferase
TT_RS09505	tRNA (guanine-N2)-dimethyltransferase
TT_RS03410	tRNA (guanosine(37)-N1)-methyltransferase TrmD
TT_RS09270	tRNA (N6-adenosine(37)-N6)-threonylcarbamoyltransferase complex ATPase TsaE
TT_RS04760	tRNA (N6-isopentenyl adenosine(37)-C2)-methylthiotransferase MiaB
TT_RS08765	tRNA 2-thiouridine(34) synthase MnmA
TT_RS07300	tRNA 4-thiouridine(8) synthase ThiI
TT_RS10085	tRNA dihydrouridine(20/20a) synthase DusA
TT_RS08505	tRNA guanosine(34) transglycosylase Tgt
TT_RS06335	tRNA modifying enzyme
TT_RS03525	tRNA preQ1(34) S-adenosylmethionine ribosyltransferase-isomerase QueA
TT_RS05895	tRNA pseudouridine(13) synthase TruD
TT_RS06400	tRNA pseudouridine(38-40) synthase TruA
TT_RS09000	tRNA pseudouridine(55) synthase TruB
TT_RS08125	tRNA uridine-5-carboxymethylaminomethyl(34) synthesis enzyme MnmG
TT_RS02850	tRNA uridine-5-carboxymethylaminomethyl(34) synthesis GTPase MnmE
TT_RS00530	tRNA(Ile)-lysidine synthetase
TT_RS11410	tRNA(Ile)-lysidine synthetase
TT_RS02585	tRNA-Ala
TT_RS07190	tRNA-Ala
TT_RS09800	tRNA-Ala
TT_RS01340	tRNA-Arg
TT_RS07895	tRNA-Arg
TT_RS08265	tRNA-Arg
TT_RS09645	tRNA-Arg
TT_RS08850	tRNA-Asn
TT_RS05100	tRNA-Asp
TT_RS00620	tRNA-Cys
TT_RS04155	tRNA-Gln
TT_RS07860	tRNA-Gln
TT_RS07850	tRNA-Glu
TT_RS07855	tRNA-Glu
TT_RS08465	tRNA-Glu
TT_RS01345	tRNA-Gly
TT_RS08190	tRNA-Gly
TT_RS08810	tRNA-Gly
TT_RS10120	tRNA-Gly
TT_RS01260	tRNA-His
TT_RS09550	tRNA-Ile
TT_RS09590	tRNA-Ile
TT_RS00550	tRNA-Leu
TT_RS01265	tRNA-Leu
TT_RS01895	tRNA-Leu
TT_RS04375	tRNA-Leu
TT_RS09275	tRNA-Leu
TT_RS05575	tRNA-Lys
TT_RS08470	tRNA-Lys
TT_RS00460	tRNA-Met
TT_RS05945	tRNA-Met
TT_RS07330	tRNA-Met
TT_RS05105	tRNA-Phe
TT_RS01350	tRNA-Pro
TT_RS02830	tRNA-Pro
TT_RS09670	tRNA-Pro
TT_RS02425	tRNA-Ser
TT_RS05950	tRNA-Ser
TT_RS06780	tRNA-Ser
TT_RS06785	tRNA-Ser
TT_RS07200	tRNA-Thr
TT_RS08800	tRNA-Thr
TT_RS08815	tRNA-Thr
TT_RS07735	tRNA-Trp
TT_RS08805	tRNA-Tyr
TT_RS00625	tRNA-Val
TT_RS03315	tRNA-Val
TT_RS03385	tRNA-Val
TT_RS08460	tRNA-Val
TT_RS04370	tryptophan--tRNA ligase
TT_RS05225	tyrosine--tRNA ligase
TT_RS04075	valine--tRNA ligase

## Sheet: 12_total
Accession-1	Product
TT_RS00530	tRNA(Ile)-lysidine synthetase
TT_RS00550	tRNA-Leu
TT_RS00625	tRNA-Val
TT_RS01035	tRNA (adenosine(37)-N6)-dimethylallyltransferase MiaA
TT_RS01040	glutamyl-tRNA(Gln) amidotransferase subunit A
TT_RS01235	tRNA (adenine(58)-N(1))-methyltransferase TrmI
TT_RS01260	tRNA-His
TT_RS01265	tRNA-Leu
TT_RS01345	tRNA-Gly
TT_RS01350	tRNA-Pro
TT_RS02425	tRNA-Ser
TT_RS02830	tRNA-Pro
TT_RS02850	tRNA uridine-5-carboxymethylaminomethyl(34) synthesis GTPase MnmE
TT_RS03315	tRNA-Val
TT_RS03385	tRNA-Val
TT_RS03525	tRNA preQ1(34) S-adenosylmethionine ribosyltransferase-isomerase QueA
TT_RS04375	tRNA-Leu
TT_RS04760	tRNA (N6-isopentenyl adenosine(37)-C2)-methylthiotransferase MiaB
TT_RS05100	tRNA-Asp
TT_RS05105	tRNA-Phe
TT_RS05440	FADH(2)-oxidizing methylenetetrahydrofolate--tRNA-(uracil(54)-C(5))- methyltransferase TrmFO
TT_RS05575	tRNA-Lys
TT_RS05770	glutamyl-tRNA reductase
TT_RS05895	tRNA pseudouridine(13) synthase TruD
TT_RS05945	tRNA-Met
TT_RS05950	tRNA-Ser
TT_RS06185	peptidyl-tRNA hydrolase
TT_RS06335	tRNA modifying enzyme
TT_RS06340	tRNA (guanine-N(7)-)-methyltransferase
TT_RS06400	tRNA pseudouridine(38-40) synthase TruA
TT_RS06735	prolyl-tRNA editing protein
TT_RS06780	tRNA-Ser
TT_RS07190	tRNA-Ala
TT_RS07300	tRNA 4-thiouridine(8) synthase ThiI
TT_RS07330	tRNA-Met
TT_RS07735	tRNA-Trp
TT_RS07850	tRNA-Glu
TT_RS07855	tRNA-Glu
TT_RS07860	tRNA-Gln
TT_RS07895	tRNA-Arg
TT_RS08125	tRNA uridine-5-carboxymethylaminomethyl(34) synthesis enzyme MnmG
TT_RS08190	tRNA-Gly
TT_RS08205	aspartyl/glutamyl-tRNA(Asn/Gln) amidotransferase subunit B
TT_RS08425	methionyl-tRNA formyltransferase
TT_RS08460	tRNA-Val
TT_RS08465	tRNA-Glu
TT_RS08505	tRNA guanosine(34) transglycosylase Tgt
TT_RS08805	tRNA-Tyr
TT_RS08810	tRNA-Gly
TT_RS08815	tRNA-Thr
TT_RS08850	tRNA-Asn
TT_RS09000	tRNA pseudouridine(55) synthase TruB
TT_RS09270	tRNA (N6-adenosine(37)-N6)-threonylcarbamoyltransferase complex ATPase TsaE
TT_RS09275	tRNA-Leu
TT_RS09405	alanyl-tRNA editing protein
TT_RS09550	tRNA-Ile
TT_RS09590	tRNA-Ile
TT_RS09645	tRNA-Arg
TT_RS09670	tRNA-Pro
TT_RS09800	tRNA-Ala
TT_RS10085	tRNA dihydrouridine(20/20a) synthase DusA
TT_RS10120	tRNA-Gly
TT_RS11410	tRNA(Ile)-lysidine synthetase

## Sheet: 34_total
Accession-1	Product
TT_RS00530	tRNA(Ile)-lysidine synthetase
TT_RS01035	tRNA (adenosine(37)-N6)-dimethylallyltransferase MiaA
TT_RS01040	glutamyl-tRNA(Gln) amidotransferase subunit A
TT_RS01235	tRNA (adenine(58)-N(1))-methyltransferase TrmI
TT_RS01260	tRNA-His
TT_RS01265	tRNA-Leu
TT_RS02850	tRNA uridine-5-carboxymethylaminomethyl(34) synthesis GTPase MnmE
TT_RS03315	tRNA-Val
TT_RS04375	tRNA-Leu
TT_RS04760	tRNA (N6-isopentenyl adenosine(37)-C2)-methylthiotransferase MiaB
TT_RS05100	tRNA-Asp
TT_RS05105	tRNA-Phe
TT_RS05440	FADH(2)-oxidizing methylenetetrahydrofolate--tRNA-(uracil(54)-C(5))- methyltransferase TrmFO
TT_RS05770	glutamyl-tRNA reductase
TT_RS05895	tRNA pseudouridine(13) synthase TruD
TT_RS05945	tRNA-Met
TT_RS06185	peptidyl-tRNA hydrolase
TT_RS06335	tRNA modifying enzyme
TT_RS06400	tRNA pseudouridine(38-40) synthase TruA
TT_RS06780	tRNA-Ser
TT_RS07190	tRNA-Ala
TT_RS07300	tRNA 4-thiouridine(8) synthase ThiI
TT_RS07860	tRNA-Gln
TT_RS07895	tRNA-Arg
TT_RS08205	aspartyl/glutamyl-tRNA(Asn/Gln) amidotransferase subunit B
TT_RS08425	methionyl-tRNA formyltransferase
TT_RS08505	tRNA guanosine(34) transglycosylase Tgt
TT_RS08805	tRNA-Tyr
TT_RS08850	tRNA-Asn
TT_RS09000	tRNA pseudouridine(55) synthase TruB
TT_RS09270	tRNA (N6-adenosine(37)-N6)-threonylcarbamoyltransferase complex ATPase TsaE
TT_RS09275	tRNA-Leu
TT_RS09590	tRNA-Ile
TT_RS09670	tRNA-Pro
TT_RS09800	tRNA-Ala
TT_RS11410	tRNA(Ile)-lysidine synthetase
TT_RS02640	aspartyl/glutamyl-tRNA(Asn/Gln) amidotransferase subunit C
TT_RS03410	tRNA (guanosine(37)-N1)-methyltransferase TrmD
TT_RS04495	tRNA (adenosine(37)-N6)-threonylcarbamoyltransferase complex transferase subunit TsaD
TT_RS06785	tRNA-Ser
TT_RS08765	tRNA 2-thiouridine(34) synthase MnmA

## Sheet: 12_34_common
Accession-1	Product
TT_RS00530	tRNA(Ile)-lysidine synthetase
TT_RS01035	tRNA (adenosine(37)-N6)-dimethylallyltransferase MiaA
TT_RS01040	glutamyl-tRNA(Gln) amidotransferase subunit A
TT_RS01235	tRNA (adenine(58)-N(1))-methyltransferase TrmI
TT_RS01260	tRNA-His
TT_RS01265	tRNA-Leu
TT_RS02850	tRNA uridine-5-carboxymethylaminomethyl(34) synthesis GTPase MnmE
TT_RS03315	tRNA-Val
TT_RS04375	tRNA-Leu
TT_RS04760	tRNA (N6-isopentenyl adenosine(37)-C2)-methylthiotransferase MiaB
TT_RS05100	tRNA-Asp
TT_RS05105	tRNA-Phe
TT_RS05440	FADH(2)-oxidizing methylenetetrahydrofolate--tRNA-(uracil(54)-C(5))- methyltransferase TrmFO
TT_RS05770	glutamyl-tRNA reductase
TT_RS05895	tRNA pseudouridine(13) synthase TruD
TT_RS05945	tRNA-Met
TT_RS06185	peptidyl-tRNA hydrolase
TT_RS06335	tRNA modifying enzyme
TT_RS06400	tRNA pseudouridine(38-40) synthase TruA
TT_RS06780	tRNA-Ser
TT_RS07190	tRNA-Ala
TT_RS07300	tRNA 4-thiouridine(8) synthase ThiI
TT_RS07860	tRNA-Gln
TT_RS07895	tRNA-Arg
TT_RS08205	aspartyl/glutamyl-tRNA(Asn/Gln) amidotransferase subunit B
TT_RS08425	methionyl-tRNA formyltransferase
TT_RS08505	tRNA guanosine(34) transglycosylase Tgt
TT_RS08805	tRNA-Tyr
TT_RS08850	tRNA-Asn
TT_RS09000	tRNA pseudouridine(55) synthase TruB
TT_RS09270	tRNA (N6-adenosine(37)-N6)-threonylcarbamoyltransferase complex ATPase TsaE
TT_RS09275	tRNA-Leu
TT_RS09590	tRNA-Ile
TT_RS09670	tRNA-Pro
TT_RS09800	tRNA-Ala
TT_RS11410	tRNA(Ile)-lysidine synthetase

## Sheet: 12_only
Accession-1	Product
TT_RS00550	tRNA-Leu
TT_RS00625	tRNA-Val
TT_RS01345	tRNA-Gly
TT_RS01350	tRNA-Pro
TT_RS02425	tRNA-Ser
TT_RS02830	tRNA-Pro
TT_RS03385	tRNA-Val
TT_RS03525	tRNA preQ1(34) S-adenosylmethionine ribosyltransferase-isomerase QueA
TT_RS05575	tRNA-Lys
TT_RS05950	tRNA-Ser
TT_RS06340	tRNA (guanine-N(7)-)-methyltransferase
TT_RS06735	prolyl-tRNA editing protein
TT_RS07330	tRNA-Met
TT_RS07735	tRNA-Trp
TT_RS07850	tRNA-Glu
TT_RS07855	tRNA-Glu
TT_RS08125	tRNA uridine-5-carboxymethylaminomethyl(34) synthesis enzyme MnmG
TT_RS08190	tRNA-Gly
TT_RS08460	tRNA-Val
TT_RS08465	tRNA-Glu
TT_RS08810	tRNA-Gly
TT_RS08815	tRNA-Thr
TT_RS09405	alanyl-tRNA editing protein
TT_RS09550	tRNA-Ile
TT_RS09645	tRNA-Arg
TT_RS10085	tRNA dihydrouridine(20/20a) synthase DusA
TT_RS10120	tRNA-Gly

## Sheet: 34_only
Accession-1	Product
TT_RS02640	aspartyl/glutamyl-tRNA(Asn/Gln) amidotransferase subunit C
TT_RS03410	tRNA (guanosine(37)-N1)-methyltransferase TrmD
TT_RS04495	tRNA (adenosine(37)-N6)-threonylcarbamoyltransferase complex transferase subunit TsaD
TT_RS06785	tRNA-Ser
TT_RS08765	tRNA 2-thiouridine(34) synthase MnmA

## Sheet: nopeaks
Accession-1	Product
TT_RS00040	tRNA (adenosine(37)-N6)-threonylcarbamoyltransferase complex dimerization subunit type 1 TsaB
TT_RS00460	tRNA-Met
TT_RS00620	tRNA-Cys
TT_RS01340	tRNA-Arg
TT_RS01895	tRNA-Leu
TT_RS02585	tRNA-Ala
TT_RS02960	D-aminoacyl-tRNA deacylase
TT_RS04155	tRNA-Gln
TT_RS07200	tRNA-Thr
TT_RS08265	tRNA-Arg
TT_RS08470	tRNA-Lys
TT_RS08800	tRNA-Thr
TT_RS09505	tRNA (guanine-N2)-dimethyltransferase
