# Supplementary material
Source: HighWire-hosted journal article supplement (doi:10.1101/rna.075580.120)
Supplement: Supplemental_Table_5b.xlsx [file Supplemental_Table_5b.xlsx]

## Sheet: all_tRNA-genes
Accession-1	Left-End-Position	Right-End-Position	Product
TT_RS00460	81931	82006	tRNA-Met
TT_RS00550	98459	98545	tRNA-Leu
TT_RS00620	107423	107497	tRNA-Cys
TT_RS00625	107506	107582	tRNA-Val
TT_RS01260	236743	236819	tRNA-His
TT_RS01265	236870	236954	tRNA-Leu
TT_RS01340	253421	253496	tRNA-Arg
TT_RS01345	253532	253608	tRNA-Gly
TT_RS01350	253610	253686	tRNA-Pro
TT_RS01895	359615	359702	tRNA-Leu
TT_RS02425	466976	467069	tRNA-Ser
TT_RS02585	493891	493965	tRNA-Ala
TT_RS02830	544999	545075	tRNA-Pro
TT_RS03315	641868	641940	tRNA-Val
TT_RS03385	653144	653218	tRNA-Val
TT_RS04155	804744	804817	tRNA-Gln
TT_RS04375	840876	840962	tRNA-Leu
TT_RS05100	987923	987999	tRNA-Asp
TT_RS05105	988001	988076	tRNA-Phe
TT_RS05575	1071533	1071608	tRNA-Lys
TT_RS05945	1143997	1144073	tRNA-Met
TT_RS05950	1145622	1145713	tRNA-Ser
TT_RS06780	1278359	1278451	tRNA-Ser
TT_RS06785	1278459	1278549	tRNA-Ser
TT_RS07190	1347714	1347789	tRNA-Ala
TT_RS07200	1348123	1348197	tRNA-Thr
TT_RS07330	1371658	1371734	tRNA-Met
TT_RS07735	1459528	1459603	tRNA-Trp
TT_RS07850	1477266	1477341	tRNA-Glu
TT_RS07855	1477362	1477436	tRNA-Glu
TT_RS07860	1477443	1477516	tRNA-Gln
TT_RS07895	1482686	1482762	tRNA-Arg
TT_RS08190	1537593	1537668	tRNA-Gly
TT_RS08265	1553520	1553596	tRNA-Arg
TT_RS08460	1582278	1582354	tRNA-Val
TT_RS08465	1582356	1582430	tRNA-Glu
TT_RS08470	1582437	1582512	tRNA-Lys
TT_RS08800	1649501	1649576	tRNA-Thr
TT_RS08805	1649589	1649674	tRNA-Tyr
TT_RS08810	1649701	1649776	tRNA-Gly
TT_RS08815	1649780	1649855	tRNA-Thr
TT_RS08850	1653337	1653412	tRNA-Asn
TT_RS09275	1729381	1729467	tRNA-Leu
TT_RS09550	1778425	1778501	tRNA-Ile
TT_RS09590	1793287	1793358	tRNA-Ile
TT_RS09645	1804494	1804570	tRNA-Arg
TT_RS09670	1808314	1808390	tRNA-Pro
TT_RS09800	1831791	1831866	tRNA-Ala
TT_RS10120	1891638	1891713	tRNA-Gly

## Sheet: 12_total
TT_RS00550	tRNA-Leu
TT_RS00625	tRNA-Val
TT_RS01260	tRNA-His
TT_RS01265	tRNA-Leu
TT_RS01345	tRNA-Gly
TT_RS01350	tRNA-Pro
TT_RS02425	tRNA-Ser
TT_RS02830	tRNA-Pro
TT_RS03315	tRNA-Val
TT_RS03385	tRNA-Val
TT_RS04375	tRNA-Leu
TT_RS05100	tRNA-Asp
TT_RS05105	tRNA-Phe
TT_RS05575	tRNA-Lys
TT_RS05945	tRNA-Met
TT_RS05950	tRNA-Ser
TT_RS06780	tRNA-Ser
TT_RS07190	tRNA-Ala
TT_RS07330	tRNA-Met
TT_RS07735	tRNA-Trp
TT_RS07850	tRNA-Glu
TT_RS07855	tRNA-Glu
TT_RS07860	tRNA-Gln
TT_RS07895	tRNA-Arg
TT_RS08190	tRNA-Gly
TT_RS08460	tRNA-Val
TT_RS08465	tRNA-Glu
TT_RS08805	tRNA-Tyr
TT_RS08810	tRNA-Gly
TT_RS08815	tRNA-Thr
TT_RS08850	tRNA-Asn
TT_RS09275	tRNA-Leu
TT_RS09550	tRNA-Ile
TT_RS09590	tRNA-Ile
TT_RS09645	tRNA-Arg
TT_RS09670	tRNA-Pro
TT_RS09800	tRNA-Ala
TT_RS10120	tRNA-Gly

## Sheet: 34_total
Accession-1	Product
TT_RS01260	tRNA-His
TT_RS01265	tRNA-Leu
TT_RS03315	tRNA-Val
TT_RS04375	tRNA-Leu
TT_RS05100	tRNA-Asp
TT_RS05105	tRNA-Phe
TT_RS05945	tRNA-Met
TT_RS06780	tRNA-Ser
TT_RS07190	tRNA-Ala
TT_RS07860	tRNA-Gln
TT_RS07895	tRNA-Arg
TT_RS08805	tRNA-Tyr
TT_RS08850	tRNA-Asn
TT_RS09275	tRNA-Leu
TT_RS09590	tRNA-Ile
TT_RS09670	tRNA-Pro
TT_RS09800	tRNA-Ala
TT_RS06785	tRNA-Ser

## Sheet: 12_34_common
Accession-1	Product
TT_RS01260	tRNA-His
TT_RS01265	tRNA-Leu
TT_RS03315	tRNA-Val
TT_RS04375	tRNA-Leu
TT_RS05100	tRNA-Asp
TT_RS05105	tRNA-Phe
TT_RS05945	tRNA-Met
TT_RS06780	tRNA-Ser
TT_RS07190	tRNA-Ala
TT_RS07860	tRNA-Gln
TT_RS07895	tRNA-Arg
TT_RS08805	tRNA-Tyr
TT_RS08850	tRNA-Asn
TT_RS09275	tRNA-Leu
TT_RS09590	tRNA-Ile
TT_RS09670	tRNA-Pro
TT_RS09800	tRNA-Ala

## Sheet: 12_only
Accession-1	Product
TT_RS00550	tRNA-Leu
TT_RS00625	tRNA-Val
TT_RS01345	tRNA-Gly
TT_RS01350	tRNA-Pro
TT_RS02425	tRNA-Ser
TT_RS02830	tRNA-Pro
TT_RS03385	tRNA-Val
TT_RS05575	tRNA-Lys
TT_RS05950	tRNA-Ser
TT_RS07330	tRNA-Met
TT_RS07735	tRNA-Trp
TT_RS07850	tRNA-Glu
TT_RS07855	tRNA-Glu
TT_RS08190	tRNA-Gly
TT_RS08460	tRNA-Val
TT_RS08465	tRNA-Glu
TT_RS08810	tRNA-Gly
TT_RS08815	tRNA-Thr
TT_RS09550	tRNA-Ile
TT_RS09645	tRNA-Arg
TT_RS10120	tRNA-Gly

## Sheet: 34_only
Accession-1	Product
TT_RS06785	tRNA-Ser

## Sheet: nopeaks
Accession-1	Product
TT_RS00460	tRNA-Met
TT_RS00620	tRNA-Cys
TT_RS01340	tRNA-Arg
TT_RS01895	tRNA-Leu
TT_RS02585	tRNA-Ala
TT_RS04155	tRNA-Gln
TT_RS07200	tRNA-Thr
TT_RS08265	tRNA-Arg
TT_RS08470	tRNA-Lys
TT_RS08800	tRNA-Thr
