# Supplementary material
Source: HighWire-hosted journal article supplement (doi:10.1101/rna.075580.120)
Supplement: Supplemental_Table_5c.xlsx [file Supplemental_Table_5c.xlsx]

## Sheet: all_tRNA-ligase_genes
Accession-1	Left-End-Position	Right-End-Position	Product
TT_RS00345	60991	62397	glutamate--tRNA ligase
TT_RS00890	157809	159329	glycine--tRNA ligase
TT_RS00920	162273	163919	glutamine--tRNA ligase
TT_RS01810	342469	343785	asparagine--tRNA ligase
TT_RS01825	345569	347311	aspartate--tRNA ligase
TT_RS01830	347336	348601	histidine--tRNA ligase
TT_RS02635	503269	504534	serine--tRNA ligase
TT_RS02720	523312	524754	cysteine--tRNA ligase
TT_RS03455	662915	664393	lysine--tRNA ligase
TT_RS03570	686997	690128	isoleucine--tRNA ligase
TT_RS04075	785301	787889	valine--tRNA ligase
TT_RS04370	839818	840831	tryptophan--tRNA ligase
TT_RS04710	911534	913390	methionine--tRNA ligase subunit beta
TT_RS05225	1008870	1010168	tyrosine--tRNA ligase
TT_RS07480	1401661	1404309	alanine--tRNA ligase
TT_RS07650	1438773	1440752	threonine--tRNA ligase
TT_RS08060	1509124	1510176	phenylalanine--tRNA ligase subunit alpha
TT_RS08065	1510173	1512530	phenylalanine--tRNA ligase subunit beta
TT_RS09285	1731471	1734107	leucine--tRNA ligase
TT_RS09610	1796200	1797633	proline--tRNA ligase
TT_RS09705	1813283	1815061	arginine--tRNA ligase

## Sheet: 12_total
Accession-1	Product
TT_RS00890	glycine--tRNA ligase
TT_RS00920	glutamine--tRNA ligase
TT_RS01810	asparagine--tRNA ligase
TT_RS01825	aspartate--tRNA ligase
TT_RS01830	histidine--tRNA ligase
TT_RS02635	serine--tRNA ligase
TT_RS02720	cysteine--tRNA ligase
TT_RS03455	lysine--tRNA ligase
TT_RS03570	isoleucine--tRNA ligase
TT_RS04075	valine--tRNA ligase
TT_RS04370	tryptophan--tRNA ligase
TT_RS04710	methionine--tRNA ligase subunit beta
TT_RS05225	tyrosine--tRNA ligase
TT_RS05490	aspartate--tRNA(Asn) ligase
TT_RS07480	alanine--tRNA ligase
TT_RS07650	threonine--tRNA ligase
TT_RS08060	phenylalanine--tRNA ligase subunit alpha
TT_RS08065	phenylalanine--tRNA ligase subunit beta
TT_RS09285	leucine--tRNA ligase
TT_RS09610	proline--tRNA ligase
TT_RS09705	arginine--tRNA ligase

## Sheet: 34_total
Accession-1	Product
TT_RS00890	glycine--tRNA ligase
TT_RS00920	glutamine--tRNA ligase
TT_RS01810	asparagine--tRNA ligase
TT_RS01825	aspartate--tRNA ligase
TT_RS01830	histidine--tRNA ligase
TT_RS02635	serine--tRNA ligase
TT_RS02720	cysteine--tRNA ligase
TT_RS03455	lysine--tRNA ligase
TT_RS03570	isoleucine--tRNA ligase
TT_RS04075	valine--tRNA ligase
TT_RS04370	tryptophan--tRNA ligase
TT_RS04710	methionine--tRNA ligase subunit beta
TT_RS07480	alanine--tRNA ligase
TT_RS07650	threonine--tRNA ligase
TT_RS08065	phenylalanine--tRNA ligase subunit beta
TT_RS09285	leucine--tRNA ligase
TT_RS09610	proline--tRNA ligase
TT_RS09705	arginine--tRNA ligase
TT_RS00345	glutamate--tRNA ligase

## Sheet: 12_34_common
Accession-1	Product
TT_RS00890	glycine--tRNA ligase
TT_RS00920	glutamine--tRNA ligase
TT_RS01810	asparagine--tRNA ligase
TT_RS01825	aspartate--tRNA ligase
TT_RS01830	histidine--tRNA ligase
TT_RS02635	serine--tRNA ligase
TT_RS02720	cysteine--tRNA ligase
TT_RS03455	lysine--tRNA ligase
TT_RS03570	isoleucine--tRNA ligase
TT_RS04075	valine--tRNA ligase
TT_RS04370	tryptophan--tRNA ligase
TT_RS04710	methionine--tRNA ligase subunit beta
TT_RS07480	alanine--tRNA ligase
TT_RS07650	threonine--tRNA ligase
TT_RS08065	phenylalanine--tRNA ligase subunit beta
TT_RS09285	leucine--tRNA ligase
TT_RS09610	proline--tRNA ligase
TT_RS09705	arginine--tRNA ligase

## Sheet: 12_only
Accession-1	Product
TT_RS05225	tyrosine--tRNA ligase
TT_RS05490	aspartate--tRNA(Asn) ligase
TT_RS08060	phenylalanine--tRNA ligase subunit alpha

## Sheet: 34_only
Accession-1	Product
TT_RS00345	glutamate--tRNA ligase
